# Supplementary material for: Transcriptome sequencing unveils a novel mechanism underlying breed distinctions between thin- and fat-tailed sheep
Source: Research Square preprint supplement (doi:10.21203/rs.3.rs-6146587/v1), 2025-03-06
Supplement: Supplementary file 1 [file 4f61e52a94c1613f080af5bc.xlsx]

## Sheet: HUS vs SFK
GO_accession	Description	Term_type	Over_represented_pValue	Corrected_pValue	CAD_item	CAD_list	Bg_item	Bg_list	Gene_names
GO:0005126	cytokine receptor binding	molecular_function	6.7048e-41	3.0098e-37	70	1056	176	19038	114112835,101122820,101118148,105601956,114113008,114113086,101103623,114112826,114112837,114113004,101122496,114112846,101103702,114113019,101102957,101104401,101104661,101105135,114113208,114113089,100135696,101111520,114113206,121818508,121818657,101108765,114112843,114112829,114112844,105608320,114113006,114112840,114112842,114113084,121818510,114113147,114112830,114112821,114113003,114112827…
GO:0006952	defense response	biological_process	4.7379e-21	1.0634e-17	73	1056	379	19038	114112822,101102963,114113005,101106415,492823,101103872,101117183,114113207,114112819,101109364,101115969,114113016,114113090,114112820,101105632,114112832,114112828,106990900,101106400,114112883,101103376,100137070,114112818,121818510,101107943,114113084,114112827,114113003,114112821,114112830,114113147,114112824,121818509,105601948,121818512,101111466,114112825,101111435,101110078,114113206,10…
GO:0006955	immune response	biological_process	1.9296e-17	2.8874e-14	56	1056	276	19038	101122559,101113217,101107908,101104151,114116137,114116088,101102699,114108725,443442,100135696,101114089,114108855,101104866,114116113,101108765,101123078,443441,100171394,114116130,114108665,114109642,114116134,101112480,443380,114109640,114109639,114116078,101110103,114116224,XLOC_114822,101102047,443540,106990117,101111694,101118148,101122820,101110725,106991302,101122496,101102917,101105860…
GO:0002376	immune system process	biological_process	3.955e-17	4.4385e-14	60	1056	317	19038	101107908,101122559,101113217,114116113,101114089,101104866,114108855,114108725,443442,100135696,101102699,114116137,114116088,101104151,114108665,114116130,100171394,114112680,101108765,101123078,443441,114116134,114109642,114109639,443380,114109640,105608906,101112480,101115969,114115360,114116078,443540,101102047,XLOC_114822,114116224,101110103,101111694,106990117,101118148,101122820,101110725…
GO:0019882	antigen processing and presentation	biological_process	6.5379e-11	5.8697e-08	17	1056	44	19038	100171394,106991302,101107908,101113217,114116113,101104866,114108725,114116088,101102047,114109630,XLOC_114822,101119545,114116085,101111694,101103958,106990117,114116078
GO:0005102	receptor binding	molecular_function	3.5333e-10	2.6435e-07	88	1056	798	19038	114112832,101105632,443540,114112828,106990900,101106400,114112883,114112818,101103376,443380,114113016,114113090,101121484,114112820,101103872,114108665,101123078,114113207,114112819,114112822,101117600,101117613,114113005,101102963,492823,780460,101104151,101102699,114112825,101111435,114112824,121818509,105601948,121818512,114112827,114113003,114112821,114112830,101117633,114113147,121818510,1…
GO:0005576	extracellular region	cellular_component	1.7713e-09	1.1359e-06	151	1056	1711	19038	106990900,101105960,114112832,101105632,443380,101123376,101105321,105616456,101117020,101122183,114113016,101110458,101120348,114113207,101118240,101117613,101104151,114116113,492823,114112825,114109630,101110078,443469,121818509,121818512,114113003,101116078,101117290,114112827,101115572,114113147,114112830,101106490,121818510,114118872,114118738,101114859,101111837,101102047,114112842,10110998…
GO:0006950	response to stress	biological_process	2.1305e-09	1.1955e-06	115	1056	1201	19038	101110078,101111435,101121486,114109630,114112825,101111466,105604930,121818512,105601948,121818509,114112824,114113147,114112821,114112830,114113003,114112827,106991182,114113084,101107943,101103339,101123507,121818510,114112818,100137070,101103376,114112883,101106400,106990900,114112828,101121229,443155,114109364,114112832,101105632,114112820,101122097,114113090,101115969,114113016,101105321,10…
GO:0005515	protein binding	molecular_function	5.4591e-08	2.7229e-05	406	1056	6006	19038	443441,101117983,105605912,114113207,101120348,101121729,114109642,101113095,101103311,101121071,492823,101104151,101121640,114112832,100526763,106990900,101117081,114117768,101102630,101105756,101116992,105616456,101106209,443380,101117900,101103140,114113003,101106971,114112830,114113147,121818510,106990146,101113744,101112273,114112825,443469,101113112,101111901,101119678,101118230,121818509,1…
GO:0005488	binding	molecular_function	6.3037e-08	2.8297e-05	712	1056	11509	19038	101105527,114118066,101118350,101114452,105607536,101121231,101105389,101103233,101116260,100307045,101106631,101103702,105610305,100302084,101111082,101122820,114108616,105609437,101118562,114112835,101118218,101123365,101106237,101119088,101119865,101120572,105601956,101110796,101111654,101111837,101102047,101121901,101114859,101121914,114118738,101104029,101115630,101102339,101108724,101121179…
GO:0017053	transcriptional repressor complex	cellular_component	1.8288e-07	7.4633e-05	10	1056	23	19038	1.14113e+89
GO:0007156	homophilic cell adhesion	biological_process	3.0628e-06	0.0011458	18	1056	94	19038	1.01102e+161
GO:0050896	response to stimulus	biological_process	6.6483e-06	0.0022957	314	1056	4527	19038	101103702,100302084,101110699,101105860,114112837,101118148,105601956,101123365,114112835,101122820,554261,101121048,114113089,100144425,101106764,114116085,101105527,101114452,101115824,101118296,101108765,101105547,100171394,114112680,101118762,114116134,101102343,114114866,101107908,101114925,114108725,100135696,114118738,554257,101102047,101111837,106990117,101112480,101115374,114116078,10111…
GO:0016337	cell-cell adhesion	biological_process	1.4293e-05	0.0045831	19	1056	114	19038	1.01105e+170
GO:0042611	MHC protein complex	cellular_component	2.1074e-05	0.0059126	8	1056	23	19038	1.14116e+71
GO:0042613	MHC class II protein complex	cellular_component	2.1074e-05	0.0059126	8	1056	23	19038	1.06991e+71
GO:0005164	tumor necrosis factor receptor binding	molecular_function	0.00010246	0.025553	7	1056	21	19038	4.4354e+59
GO:0032813	tumor necrosis factor receptor superfamily binding	molecular_function	0.00010246	0.025553	7	1056	21	19038	1.01109e+59
GO:0005506	iron ion binding	molecular_function	0.00045941	0.10854	24	1056	206	19038	4.43533e+212
GO:0019900	kinase binding	molecular_function	0.0006383	0.14327	9	1056	45	19038	1.01118e+80
GO:0019901	protein kinase binding	molecular_function	0.00090534	0.19353	8	1056	38	19038	1.01103e+71
GO:0043169	cation binding	molecular_function	0.0010554	0.21218	226	1056	3417	19038	101110591,101123376,101107672,105616456,101122045,101102059,101117691,101117081,101121174,101103720,101105756,101112275,101102630,114117992,101117613,101106047,101117763,101103840,101103311,101121441,114114885,101121510,101118441,101119599,101117184,101110423,105605912,101103227,101122993,101117955,101121347,101118230,100145857,105606599,105616742,101112864,101122928,101104979,101123120,101102726…
GO:0046872	metal ion binding	molecular_function	0.0010871	0.21218	225	1056	3402	19038	101118159,101118398,101103914,105601907,101111046,101102378,101112872,101107192,XLOC_069361,114117880,101108241,101122194,101116988,101111508,101113685,101117102,114116429,101111966,101122213,101105773,101119041,101119938,101107593,101123079,101112384,101113906,101102480,100145858,101106760,106991171,105604882,101116741,101106373,101122615,114117799,100125618,101106425,101108604,101123658,1011116…
GO:0000079	regulation of cyclin-dependent protein serine/threonine kinase activity	biological_process	0.0014989	0.26915	3	1056	5	19038	1.01118e+26
GO:0071900	regulation of protein serine/threonine kinase activity	biological_process	0.0014989	0.26915	3	1056	5	19038	1.01118e+26
GO:0016705	oxidoreductase activity, acting on paired donors, with incorporation or reduction of molecular oxygen	molecular_function	0.001748	0.30179	23	1056	216	19038	1.00568e+200
GO:0019646	aerobic electron transport chain	biological_process	0.0028577	0.47512	2	1056	2	19038	1.01109e+17
GO:0072527	pyrimidine-containing compound metabolic process	biological_process	0.0034537	0.5537	10	1056	67	19038	114116607,101116528,121819509,105616742,101119865,XLOC_069361,101113998,101102378,101113871,101114859
GO:0009200	deoxyribonucleoside triphosphate metabolic process	biological_process	0.0062194	0.90061	4	1056	14	19038	XLOC_069361,114116607,105616742,121819509
GO:0009211	pyrimidine deoxyribonucleoside triphosphate metabolic process	biological_process	0.0062194	0.90061	4	1056	14	19038	121819509,105616742,XLOC_069361,114116607
GO:0046080	dUTP metabolic process	biological_process	0.0062194	0.90061	4	1056	14	19038	121819509,105616742,114116607,XLOC_069361
GO:0009219	pyrimidine deoxyribonucleotide metabolic process	biological_process	0.0080844	1	4	1056	15	19038	105616742,121819509,114116607,XLOC_069361
GO:0009394	2'-deoxyribonucleotide metabolic process	biological_process	0.0080844	1	4	1056	15	19038	105616742,121819509,XLOC_069361,114116607
GO:0019692	deoxyribose phosphate metabolic process	biological_process	0.0080844	1	4	1056	15	19038	114116607,XLOC_069361,121819509,105616742
GO:0043158	heterocyst differentiation	biological_process	0.0082684	1	2	1056	3	19038	1.01115e+17
GO:0003810	protein-glutamine gamma-glutamyltransferase activity	molecular_function	0.0093868	1	4	1056	16	19038	1.01114e+35
GO:0004558	alpha-glucosidase activity	molecular_function	0.010606	1	3	1056	9	19038	1.01103e+26
GO:0004564	beta-fructofuranosidase activity	molecular_function	0.010606	1	3	1056	9	19038	1.01103e+26
GO:0004575	sucrose alpha-glucosidase activity	molecular_function	0.010606	1	3	1056	9	19038	1.01111e+26
GO:0015926	glucosidase activity	molecular_function	0.010606	1	3	1056	9	19038	1.01111e+26
GO:0009262	deoxyribonucleotide metabolic process	biological_process	0.013024	1	4	1056	17	19038	114116607,XLOC_069361,121819509,105616742
GO:0043167	ion binding	molecular_function	0.01334	1	322	1056	5289	19038	101120796,121816444,101117440,114108597,101117358,114115360,101114786,101111450,101114767,101123336,101109924,101123528,101119770,101119413,101114518,101105454,100527962,101113859,101102259,101113174,101101915,101116317,101121889,101107820,101110289,101102668,101110124,101115278,101121740,105613287,101116056,101113358,101102310,101104745,101103714,443078,101114773,101122521,101119014,114118047,10…
GO:0006220	pyrimidine nucleotide metabolic process	biological_process	0.013341	1	6	1056	36	19038	121819509,105616742,101119865,101114859,114116607,XLOC_069361
GO:0044459	plasma membrane part	cellular_component	0.014073	1	20	1056	213	19038	1.01121e+179
GO:0018149	peptide cross-linking	biological_process	0.014597	1	4	1056	18	19038	1.01112e+35
GO:0004517	nitric-oxide synthase activity	molecular_function	0.016175	1	2	1056	4	19038	443078443533
GO:0006809	nitric oxide biosynthetic process	biological_process	0.016175	1	2	1056	4	19038	443533443078
GO:0046209	nitric oxide metabolic process	biological_process	0.016175	1	2	1056	4	19038	443533443078
GO:0030117	membrane coat	cellular_component	0.017085	1	14	1056	137	19038	1.01112e+125
GO:0048475	coated membrane	cellular_component	0.017085	1	14	1056	137	19038	1.01102e+125
GO:0005788	endoplasmic reticulum lumen	cellular_component	0.017224	1	2	1056	4	19038	1.05616e+17
GO:0048309	endoplasmic reticulum inheritance	biological_process	0.01971	1	3	1056	11	19038	1.00359e+23
GO:0020037	heme binding	molecular_function	0.020434	1	17	1056	177	19038	1.01123e+152
GO:0016746	transferase activity, transferring acyl groups	molecular_function	0.021062	1	23	1056	266	19038	1.01121e+206
GO:0005509	calcium ion binding	molecular_function	0.023179	1	42	1056	558	19038	101112525,101123632,101113020,101120979,101102449,101103472,101116580,101122600,101117633,101103233,106991171,101104745,101112321,101102726,101123120,105608322,101104912,101105527,101119678,101108165,101102310,101121093,101118669,101107820,101121889,114114885,101102480,100145858,105605912,101122993,443001,101118159,101123376,101104029,101114786,101102059,101111450,101114767,101119604,101122194,10…
GO:1901617	organic hydroxy compound biosynthetic process	biological_process	0.024867	1	3	1056	12	19038	1.01108e+26
GO:0016646	oxidoreductase activity, acting on the CH-NH group of donors, NAD or NADP as acceptor	molecular_function	0.025164	1	5	1056	31	19038	1.14109e+44
GO:0007029	endoplasmic reticulum organization	biological_process	0.025533	1	4	1056	21	19038	1.00359e+32
GO:0043903	regulation of symbiosis, encompassing mutualism through parasitism	biological_process	0.031284	1	3	1056	13	19038	1.14118e+26
GO:0006206	pyrimidine nucleobase metabolic process	biological_process	0.031396	1	3	1056	13	19038	1.01114e+26
GO:0019856	pyrimidine nucleobase biosynthetic process	biological_process	0.031396	1	3	1056	13	19038	1.01114e+26
GO:0046906	tetrapyrrole binding	molecular_function	0.032269	1	17	1056	187	19038	1.00568e+152
GO:0031503	protein complex localization	biological_process	0.037127	1	2	1056	6	19038	1.01113e+17
GO:0030131	clathrin adaptor complex	cellular_component	0.037188	1	3	1056	14	19038	1.01102e+26
GO:0004852	uroporphyrinogen-III synthase activity	molecular_function	0.038157	1	2	1056	6	19038	1.01115e+17
GO:0005654	nucleoplasm	cellular_component	0.038604	1	28	1056	356	19038	101104487,101102976,101119854,101110936,101114511,114112822,101111979,114113008,114113005,114112826,114113207,114113147,114116130,101108604,101122097,114112824,114112829,101110976,101113034,443469,101119408,101119036,101120428,114113264,101102047,114112842,101104660,114112825
GO:0044451	nucleoplasm part	cellular_component	0.038604	1	28	1056	356	19038	114116130,114113207,114112826,114113147,114112822,101114511,114113005,114113008,101111979,101104487,101110936,101119854,101102976,114112842,101102047,114112825,101104660,101119036,101120428,443469,101119408,114113264,114112829,114112824,101110976,101113034,101122097,101108604
GO:0004932	mating-type factor pheromone receptor activity	molecular_function	0.039036	1	2	1056	6	19038	780448114117771
GO:0046165	alcohol biosynthetic process	biological_process	0.03914	1	2	1056	6	19038	1.01104e+17
GO:0009147	pyrimidine nucleoside triphosphate metabolic process	biological_process	0.041774	1	4	1056	24	19038	121819509,105616742,114116607,XLOC_069361
GO:0015097	mercury ion transmembrane transporter activity	molecular_function	0.04397	1	3	1056	15	19038	1.0112e+26
GO:0015694	mercury ion transport	biological_process	0.04397	1	3	1056	15	19038	1.0112e+26
GO:0046689	response to mercury ion	biological_process	0.04397	1	3	1056	15	19038	1.0112e+26
GO:0050787	detoxification of mercury ion	biological_process	0.04397	1	3	1056	15	19038	1.0112e+26
GO:0009112	nucleobase metabolic process	biological_process	0.046287	1	3	1056	15	19038	1.01114e+26
GO:0046112	nucleobase biosynthetic process	biological_process	0.046287	1	3	1056	15	19038	1.01114e+26
GO:0055086	nucleobase-containing small molecule metabolic process	biological_process	0.046298	1	25	1056	318	19038	100188975,101105429,101115005,114116607,114110625,101105735,101119865,101123332,100302103,101113998,101118367,101122097,101104979,121819509,101117043,105616742,101119460,101116528,101108687,XLOC_069361,101113871,101102378,101114859,101120875,101111683
GO:0016747	transferase activity, transferring acyl groups other than amino-acyl groups	molecular_function	0.046401	1	15	1056	169	19038	1.01118e+134
GO:0006278	RNA-dependent DNA replication	biological_process	0.046646	1	3	1056	15	19038	105616742,XLOC_069361,114116607
GO:0019069	viral capsid assembly	biological_process	0.048345	1	5	1056	36	19038	1.01111e+44
GO:0033178	proton-transporting two-sector ATPase complex, catalytic domain	cellular_component	0.052983	1	7	1056	62	19038	1.01107e+62
GO:0005520	insulin-like growth factor binding	molecular_function	0.053005	1	4	1056	26	19038	1.01122e+29
GO:0043549	regulation of kinase activity	biological_process	0.053083	1	4	1056	26	19038	1.01118e+35
GO:0045859	regulation of protein kinase activity	biological_process	0.053083	1	4	1056	26	19038	1.01118e+35
GO:0051338	regulation of transferase activity	biological_process	0.053083	1	4	1056	26	19038	1.01118e+35
GO:0052636	arabinosyltransferase activity	molecular_function	0.053483	1	1	1056	1	19038	101110286
GO:0071766	Actinobacterium-type cell wall biogenesis	biological_process	0.053483	1	1	1056	1	19038	101110286
GO:0008703	5-amino-6-(5-phosphoribosylamino)uracil reductase activity	molecular_function	0.053483	1	1	1056	1	19038	101115974
GO:0015562	efflux transmembrane transporter activity	molecular_function	0.053483	1	1	1056	1	19038	101120350
GO:0034639	L-amino acid efflux transmembrane transporter activity	molecular_function	0.053483	1	1	1056	1	19038	101120350
GO:0005518	collagen binding	molecular_function	0.053483	1	1	1056	1	19038	100527962
GO:0009249	protein lipoylation	biological_process	0.053483	1	1	1056	1	19038	101115676
GO:0018065	protein-cofactor linkage	biological_process	0.053483	1	1	1056	1	19038	101115676
GO:0009233	menaquinone metabolic process	biological_process	0.053483	1	1	1056	1	19038	101121954
GO:0009234	menaquinone biosynthetic process	biological_process	0.053483	1	1	1056	1	19038	101121954
GO:0016755	transferase activity, transferring amino-acyl groups	molecular_function	0.053864	1	5	1056	38	19038	1.01112e+44
GO:0005784	Sec61 translocon complex	cellular_component	0.054152	1	2	1056	7	19038	1.01118e+17
GO:0071256	translocon complex	cellular_component	0.054152	1	2	1056	7	19038	1.01118e+17
GO:0008829	dCTP deaminase activity	molecular_function	0.055171	1	1	1056	1	19038	105616742
GO:0019899	enzyme binding	molecular_function	0.056699	1	10	1056	104	19038	1.01103e+89
GO:0004222	metalloendopeptidase activity	molecular_function	0.058973	1	14	1056	161	19038	1.01104e+122
GO:0019838	growth factor binding	molecular_function	0.059945	1	4	1056	27	19038	4.43469e+29
GO:0001558	regulation of cell growth	biological_process	0.060019	1	4	1056	27	19038	1.01114e+29
GO:0008150	biological_process	biological_process	0.060395	1	809	1056	14189	19038	100302360,100302303,101115676,101102644,101110809,105605648,114110625,101118552,101106382,101107348,101107641,101103084,101118056,101118819,114118047,101114267,101110976,443078,101119014,101122521,101110124,105613287,101105135,101110258,101102310,101104661,114113206,101113217,101101915,114108855,101116317,101107820,101113438,101113859,114116076,101114518,101105454,100527962,105608906,101113034,11…
GO:0048869	cellular developmental process	biological_process	0.06161	1	21	1056	266	19038	1.01118e+182
GO:0048308	organelle inheritance	biological_process	0.062325	1	3	1056	17	19038	1.00359e+23
GO:0004488	methylenetetrahydrofolate dehydrogenase (NADP+) activity	molecular_function	0.063714	1	3	1056	17	19038	1.01105e+26
GO:0043900	regulation of multi-organism process	biological_process	0.064222	1	3	1056	17	19038	1.14119e+26
GO:0003964	RNA-directed DNA polymerase activity	molecular_function	0.064849	1	3	1056	17	19038	114116607,XLOC_069361,105616742
GO:0004176	ATP-dependent peptidase activity	molecular_function	0.064859	1	2	1056	8	19038	1.01104e+17
GO:0007155	cell adhesion	biological_process	0.065003	1	28	1056	377	19038	101108165,101107462,101102310,101102761,101103720,101117068,101104745,101123120,105608322,101102726,101104029,101114615,101102059,101110976,443001,106991171,101103233,101123376,105608906,101102480,101122600,101119731,101105151,101115115,101103472,114114885,101123632,101113020
GO:0050792	regulation of viral process	biological_process	0.068429	1	2	1056	8	19038	1.01115e+17
GO:0008137	NADH dehydrogenase (ubiquinone) activity	molecular_function	0.069581	1	6	1056	53	19038	1.01118e+53
GO:0050136	NADH dehydrogenase (quinone) activity	molecular_function	0.069581	1	6	1056	53	19038	1.01109e+53
GO:0008408	3'-5' exonuclease activity	molecular_function	0.070574	1	5	1056	41	19038	1.01117e+44
GO:0050497	transferase activity, transferring alkylthio groups	molecular_function	0.070694	1	2	1056	8	19038	1.01103e+17
GO:0050524	coenzyme-B sulfoethylthiotransferase activity	molecular_function	0.070694	1	2	1056	8	19038	1.01103e+17
GO:0040008	regulation of growth	biological_process	0.073984	1	4	1056	29	19038	1.01114e+29
GO:0016049	cell growth	biological_process	0.074124	1	4	1056	29	19038	1.01114e+29
GO:0005267	potassium channel activity	molecular_function	0.075718	1	12	1056	138	19038	1.01115e+107
GO:0005773	vacuole	cellular_component	0.077148	1	4	1056	30	19038	1.01114e+35
GO:0008610	lipid biosynthetic process	biological_process	0.077269	1	16	1056	197	19038	1.05609e+143
GO:0006816	calcium ion transport	biological_process	0.077896	1	4	1056	30	19038	1.01105e+35
GO:0022843	voltage-gated cation channel activity	molecular_function	0.078329	1	11	1056	124	19038	1.01124e+98
GO:0005244	voltage-gated ion channel activity	molecular_function	0.080362	1	12	1056	139	19038	1.01102e+107
GO:0022832	voltage-gated channel activity	molecular_function	0.080362	1	12	1056	139	19038	1.01108e+107
GO:0004185	serine-type carboxypeptidase activity	molecular_function	0.081997	1	2	1056	9	19038	1.01107e+17
GO:0005261	cation channel activity	molecular_function	0.082189	1	20	1056	261	19038	1.01111e+179
GO:0009396	folic acid-containing compound biosynthetic process	biological_process	0.083162	1	3	1056	19	19038	1.01116e+26
GO:0042301	phosphate ion binding	molecular_function	0.08644	1	2	1056	9	19038	1.01115e+17
GO:0022610	biological adhesion	biological_process	0.087337	1	28	1056	389	19038	105608906,101123376,101110976,443001,101103233,106991171,101102059,101114615,101104029,101123120,101102726,105608322,101117068,101104745,101103720,101108165,101102310,101102761,101107462,101113020,101123632,114114885,101103472,101115115,101105151,101119731,101122600,101102480
GO:0009141	nucleoside triphosphate metabolic process	biological_process	0.088135	1	11	1056	126	19038	101120875,101118367,XLOC_069361,100302103,101123332,121819509,105616742,101119460,101122097,101115005,114116607
GO:1901615	organic hydroxy compound metabolic process	biological_process	0.09064	1	5	1056	44	19038	1.01122e+44
GO:0043233	organelle lumen	cellular_component	0.091782	1	36	1056	518	19038	101110936,114113005,101111979,114112822,114113207,114116130,101122097,105616092,114115360,101113034,114112829,114113264,101120428,101119408,443155,114112842,101102047,101119854,101102976,101104487,114113008,101114511,114113147,114112826,101119619,101110893,101108604,101110976,114112824,114117337,101119870,101119036,101110342,443469,114112825,101104660
GO:0070013	intracellular organelle lumen	cellular_component	0.091782	1	36	1056	518	19038	114113008,101114511,101119854,101102976,101104487,101119619,114113147,114112826,101110976,114112824,101108604,101110893,114112825,101104660,114117337,101119870,101119036,443469,101110342,114113005,101111979,114112822,101110936,114116130,114113207,101113034,114112829,101122097,105616092,114115360,443155,114112842,101102047,114113264,101120428,101119408
GO:0030119	AP-type membrane coat adaptor complex	cellular_component	0.092096	1	3	1056	20	19038	1.01116e+26
GO:0005242	inward rectifier potassium channel activity	molecular_function	0.093997	1	3	1056	20	19038	1.01115e+26
GO:0005249	voltage-gated potassium channel activity	molecular_function	0.094175	1	9	1056	99	19038	1.01108e+80
GO:0016655	oxidoreductase activity, acting on NAD(P)H, quinone or similar compound as acceptor	molecular_function	0.094545	1	7	1056	71	19038	1.14118e+62
GO:0006547	histidine metabolic process	biological_process	0.097313	1	4	1056	32	19038	1.01115e+35
GO:0052803	imidazole-containing compound metabolic process	biological_process	0.097313	1	4	1056	32	19038	1.01109e+35
GO:0072528	pyrimidine-containing compound biosynthetic process	biological_process	0.098193	1	5	1056	45	19038	1.01114e+44
GO:0001932	regulation of protein phosphorylation	biological_process	0.098349	1	4	1056	32	19038	1.01118e+35
GO:0010827	regulation of glucose transport	biological_process	0.098711	1	2	1056	10	19038	101102366,XLOC_125215
GO:0010829	negative regulation of glucose transport	biological_process	0.098711	1	2	1056	10	19038	XLOC_125215,101102366
GO:0015758	glucose transport	biological_process	0.098711	1	2	1056	10	19038	101102366,XLOC_125215
GO:0046323	glucose import	biological_process	0.098711	1	2	1056	10	19038	XLOC_125215,101102366
GO:0046324	regulation of glucose import	biological_process	0.098711	1	2	1056	10	19038	101102366,XLOC_125215
GO:0046325	negative regulation of glucose import	biological_process	0.098711	1	2	1056	10	19038	XLOC_125215,101102366
GO:0016776	phosphotransferase activity, phosphate group as acceptor	molecular_function	0.098858	1	14	1056	173	19038	1.01109e+125
GO:0018958	phenol-containing compound metabolic process	biological_process	0.098928	1	2	1056	10	19038	1.01108e+17
GO:0030269	tetrahydromethanopterin S-methyltransferase activity	molecular_function	0.09936	1	2	1056	10	19038	1.01103e+17
GO:0042086	5-methyl-5,6,7,8-tetrahydromethanopterin-dependent methyltransferase activity	molecular_function	0.09936	1	2	1056	10	19038	1.01108e+17
GO:0071107	response to parathyroid hormone stimulus	biological_process	0.10116	1	2	1056	10	19038	1.0112e+17
GO:0005643	nuclear pore	cellular_component	0.10219	1	3	1056	21	19038	1.0112e+26
GO:0030154	cell differentiation	biological_process	0.10256	1	16	1056	206	19038	1.01115e+137
GO:0031974	membrane-enclosed lumen	cellular_component	0.10386	1	36	1056	524	19038	114112829,101113034,114115360,105616092,101122097,114112842,101102047,443155,101119408,101120428,114113264,114112822,101111979,114113005,101110936,114116130,114113207,114112824,101110976,101110893,101108604,101104660,114112825,101110342,443469,101119036,114117337,101119870,101114511,114113008,101104487,101102976,101119854,101119619,114112826,114113147
GO:0015179	L-amino acid transmembrane transporter activity	molecular_function	0.10411	1	1	1056	2	19038	101120350
GO:0006515	misfolded or incompletely synthesized protein catabolic process	biological_process	0.10411	1	1	1056	2	19038	101110809
GO:0031144	proteasome localization	biological_process	0.10411	1	1	1056	2	19038	101110809
GO:0034629	cellular protein complex localization	biological_process	0.10411	1	1	1056	2	19038	101110809
GO:0035966	response to topologically incorrect protein	biological_process	0.10411	1	1	1056	2	19038	101110809
GO:0035967	cellular response to topologically incorrect protein	biological_process	0.10411	1	1	1056	2	19038	101110809
GO:0051788	response to misfolded protein	biological_process	0.10411	1	1	1056	2	19038	101110809
GO:0071218	cellular response to misfolded protein	biological_process	0.10411	1	1	1056	2	19038	101110809
GO:0071630	nucleus-associated proteasomal ubiquitin-dependent protein catabolic process	biological_process	0.10411	1	1	1056	2	19038	101110809
GO:0004525	ribonuclease III activity	molecular_function	0.10411	1	1	1056	2	19038	101115827
GO:0004590	orotidine-5'-phosphate decarboxylase activity	molecular_function	0.10413	1	1	1056	2	19038	101116528
GO:0006207	'de novo' pyrimidine nucleobase biosynthetic process	biological_process	0.10413	1	1	1056	2	19038	101116528
GO:0005335	serotonin:sodium symporter activity	molecular_function	0.10416	1	1	1056	2	19038	101120935
GO:0031647	regulation of protein stability	biological_process	0.10472	1	2	1056	10	19038	1.01115e+17
GO:0050821	protein stabilization	biological_process	0.10472	1	2	1056	10	19038	1.21818e+17
GO:0009712	catechol-containing compound metabolic process	biological_process	0.1049	1	1	1056	2	19038	101113346
GO:0018576	catechol 1,2-dioxygenase activity	molecular_function	0.1049	1	1	1056	2	19038	101113346
GO:0019114	catechol dioxygenase activity	molecular_function	0.1049	1	1	1056	2	19038	101113346
GO:0016645	oxidoreductase activity, acting on the CH-NH group of donors	molecular_function	0.10535	1	5	1056	46	19038	1.14109e+44
GO:0005542	folic acid binding	molecular_function	0.10547	1	1	1056	2	19038	101106741
GO:0072341	modified amino acid binding	molecular_function	0.10547	1	1	1056	2	19038	101106741
GO:0042157	lipoprotein metabolic process	biological_process	0.10586	1	8	1056	87	19038	1.01102e+71
GO:0018196	peptidyl-asparagine modification	biological_process	0.10591	1	1	1056	2	19038	100037660
GO:0018279	protein N-linked glycosylation via asparagine	biological_process	0.10591	1	1	1056	2	19038	100037660
GO:0004089	carbonate dehydratase activity	molecular_function	0.10605	1	1	1056	2	19038	101106373
GO:0031981	nuclear lumen	cellular_component	0.10636	1	34	1056	493	19038	101119619,114112826,114113147,101114511,114113008,101104487,101119854,101102976,114112825,101104660,101119036,101110342,443469,114117337,114112824,101110976,101108604,101110893,114116130,114113207,114112822,114113005,101111979,101110936,101102047,114112842,443155,101120428,101119408,114113264,114112829,101113034,114115360,101122097
GO:0004017	adenylate kinase activity	molecular_function	0.10637	1	13	1056	160	19038	1.01122e+116
GO:0019060	intracellular transport of viral proteins in host cell	biological_process	0.10685	1	1	1056	2	19038	101116769
GO:0030581	symbiont intracellular protein transport in host	biological_process	0.10685	1	1	1056	2	19038	101116769
GO:0046719	regulation by virus of viral protein levels in host cell	biological_process	0.10685	1	1	1056	2	19038	101116769
GO:0051708	intracellular protein transport in other organism involved in symbiotic interaction	biological_process	0.10685	1	1	1056	2	19038	101116769
GO:0003877	ATP adenylyltransferase activity	molecular_function	0.10821	1	1	1056	2	19038	101122928
GO:0000977	RNA polymerase II regulatory region sequence-specific DNA binding	molecular_function	0.10852	1	1	1056	2	19038	101107196
GO:0000978	RNA polymerase II core promoter proximal region sequence-specific DNA binding	molecular_function	0.10852	1	1	1056	2	19038	101107196
GO:0000982	RNA polymerase II core promoter proximal region sequence-specific DNA binding transcription factor activity	molecular_function	0.10852	1	1	1056	2	19038	101107196
GO:0000987	core promoter proximal region sequence-specific DNA binding	molecular_function	0.10852	1	1	1056	2	19038	101107196
GO:0001012	RNA polymerase II regulatory region DNA binding	molecular_function	0.10852	1	1	1056	2	19038	101107196
GO:0001159	core promoter proximal region DNA binding	molecular_function	0.10852	1	1	1056	2	19038	101107196
GO:0006050	mannosamine metabolic process	biological_process	0.10934	1	1	1056	2	19038	101104144
GO:0006051	N-acetylmannosamine metabolic process	biological_process	0.10934	1	1	1056	2	19038	101104144
GO:0047465	N-acylglucosamine-6-phosphate 2-epimerase activity	molecular_function	0.10934	1	1	1056	2	19038	101104144
GO:0009607	response to biotic stimulus	biological_process	0.10944	1	16	1056	207	19038	1.14113e+143
GO:0015109	chromate transmembrane transporter activity	molecular_function	0.1096	1	1	1056	2	19038	101112188
GO:0015703	chromate transport	biological_process	0.1096	1	1	1056	2	19038	101112188
GO:0030278	regulation of ossification	biological_process	0.10969	1	1	1056	2	19038	101120412
GO:0030282	bone mineralization	biological_process	0.10969	1	1	1056	2	19038	101120412
GO:0030500	regulation of bone mineralization	biological_process	0.10969	1	1	1056	2	19038	101120412
GO:0046848	hydroxyapatite binding	molecular_function	0.10969	1	1	1056	2	19038	101120412
GO:0004618	phosphoglycerate kinase activity	molecular_function	0.10989	1	1	1056	2	19038	100216440
GO:0003954	NADH dehydrogenase activity	molecular_function	0.11153	1	6	1056	60	19038	1.01118e+53
GO:0022836	gated channel activity	molecular_function	0.11237	1	22	1056	304	19038	1.01118e+197
GO:0022839	ion gated channel activity	molecular_function	0.11237	1	22	1056	304	19038	1.01117e+197
GO:0015079	potassium ion transmembrane transporter activity	molecular_function	0.11252	1	12	1056	148	19038	1.01108e+107
GO:0046930	pore complex	cellular_component	0.11396	1	3	1056	22	19038	1.0112e+26
GO:0008009	chemokine activity	molecular_function	0.11516	1	5	1056	45	19038	1.01104e+41
GO:0042379	chemokine receptor binding	molecular_function	0.11516	1	5	1056	45	19038	4.4338e+41
GO:0009507	chloroplast	cellular_component	0.11595	1	2	1056	11	19038	1.01122e+17
GO:0009536	plastid	cellular_component	0.11595	1	2	1056	11	19038	1.01119e+17
GO:0042559	pteridine-containing compound biosynthetic process	biological_process	0.11853	1	3	1056	22	19038	1.01109e+26
GO:0043531	ADP binding	molecular_function	0.11898	1	5	1056	48	19038	1.01123e+44
GO:0019229	regulation of vasoconstriction	biological_process	0.11971	1	2	1056	11	19038	1.01123e+17
GO:0042310	vasoconstriction	biological_process	0.11971	1	2	1056	11	19038	1.01107e+17
GO:0003674	molecular_function	molecular_function	0.12119	1	940	1056	16731	19038	101115387,101123601,101110535,101122988,100135438,101109077,101122459,105612052,101117536,105608322,443413,101110249,101105735,101115680,101103339,101104863,101106419,101123507,101108969,101122875,101109695,101119719,106991182,114112820,101116587,114118046,114114525,101121706,443001,105601985,114116880,101121697,101122744,101103376,101123403,101120981,101104815,101121482,101119091,101107157,10110…
GO:0009847	spore germination	biological_process	0.12166	1	2	1056	11	19038	1.01118e+17
GO:0006269	DNA replication, synthesis of RNA primer	biological_process	0.1228	1	2	1056	11	19038	1.01117e+17
GO:0008237	metallopeptidase activity	molecular_function	0.12317	1	16	1056	213	19038	1.01104e+140
GO:0018995	host	cellular_component	0.12401	1	13	1056	166	19038	1.1411e+113
GO:0043245	extraorganismal space	cellular_component	0.12401	1	13	1056	166	19038	1.14118e+113
GO:0043657	host cell	cellular_component	0.12401	1	13	1056	166	19038	1.01102e+113
GO:0044215	other organism	cellular_component	0.12401	1	13	1056	166	19038	1.0112e+113
GO:0044216	other organism cell	cellular_component	0.12401	1	13	1056	166	19038	1.1411e+113
GO:0044217	other organism part	cellular_component	0.12401	1	13	1056	166	19038	1.1411e+113
GO:0044283	small molecule biosynthetic process	biological_process	0.12736	1	17	1056	229	19038	1.0111e+152
GO:0030118	clathrin coat	cellular_component	0.12748	1	3	1056	23	19038	1.01102e+26
GO:0010181	FMN binding	molecular_function	0.12847	1	3	1056	23	19038	4.43078e+20
GO:0003918	DNA topoisomerase type II (ATP-hydrolyzing) activity	molecular_function	0.13268	1	3	1056	23	19038	1.01111e+26
GO:0061505	DNA topoisomerase II activity	molecular_function	0.13268	1	3	1056	23	19038	1.01114e+26
GO:0012507	ER to Golgi transport vesicle membrane	cellular_component	0.13312	1	4	1056	36	19038	1.01112e+35
GO:0030127	COPII vesicle coat	cellular_component	0.13312	1	4	1056	36	19038	1.01121e+35
GO:0030134	ER to Golgi transport vesicle	cellular_component	0.13312	1	4	1056	36	19038	1.01121e+35
GO:0008172	S-methyltransferase activity	molecular_function	0.13521	1	2	1056	12	19038	1.01108e+17
GO:1901981	phosphatidylinositol phosphate binding	molecular_function	0.1367	1	2	1056	12	19038	1.01104e+17
GO:0000221	vacuolar proton-transporting V-type ATPase, V1 domain	cellular_component	0.13902	1	3	1056	24	19038	1.01107e+26
GO:0016471	vacuolar proton-transporting V-type ATPase complex	cellular_component	0.13902	1	3	1056	24	19038	1.01107e+26
GO:0004864	protein phosphatase inhibitor activity	molecular_function	0.13974	1	2	1056	12	19038	1.0111e+17
GO:0019212	phosphatase inhibitor activity	molecular_function	0.13974	1	2	1056	12	19038	1.0111e+17
GO:0009061	anaerobic respiration	biological_process	0.14001	1	3	1056	24	19038	1.01108e+26
GO:0015948	methanogenesis	biological_process	0.14001	1	3	1056	24	19038	1.01108e+26
GO:0015975	energy derivation by oxidation of reduced inorganic compounds	biological_process	0.14001	1	3	1056	24	19038	1.01103e+26
GO:0043447	alkane biosynthetic process	biological_process	0.14001	1	3	1056	24	19038	1.01103e+26
GO:0008242	omega peptidase activity	molecular_function	0.14052	1	3	1056	24	19038	1.01115e+26
GO:0070403	NAD+ binding	molecular_function	0.14076	1	2	1056	12	19038	1.01121e+17
GO:0005747	mitochondrial respiratory chain complex I	cellular_component	0.14198	1	3	1056	24	19038	1.01103e+26
GO:0030964	NADH dehydrogenase complex	cellular_component	0.14198	1	3	1056	24	19038	1.01116e+26
GO:0045271	respiratory chain complex I	cellular_component	0.14198	1	3	1056	24	19038	1.05606e+26
GO:0016567	protein ubiquitination	biological_process	0.14681	1	6	1056	65	19038	1.01106e+53
GO:0051049	regulation of transport	biological_process	0.14817	1	4	1056	38	19038	XLOC_125215,114110560,101114773,101102366
GO:0009306	protein secretion	biological_process	0.14822	1	5	1056	51	19038	1.01106e+44
GO:0005085	guanyl-nucleotide exchange factor activity	molecular_function	0.14856	1	10	1056	127	19038	1.01107e+89
GO:0008094	DNA-dependent ATPase activity	molecular_function	0.14961	1	5	1056	51	19038	1.01114e+44
GO:0016812	hydrolase activity, acting on carbon-nitrogen (but not peptide) bonds, in cyclic amides	molecular_function	0.15203	1	1	1056	3	19038	101107196
GO:0006171	cAMP biosynthetic process	biological_process	0.15206	1	2	1056	13	19038	1.01106e+17
GO:0046058	cAMP metabolic process	biological_process	0.15206	1	2	1056	13	19038	1.01112e+17
GO:0003872	6-phosphofructokinase activity	molecular_function	0.15209	1	1	1056	3	19038	443489
GO:0006230	TMP biosynthetic process	biological_process	0.15215	1	1	1056	3	19038	101119865
GO:0009173	pyrimidine ribonucleoside monophosphate metabolic process	biological_process	0.15215	1	1	1056	3	19038	101119865
GO:0009174	pyrimidine ribonucleoside monophosphate biosynthetic process	biological_process	0.15215	1	1	1056	3	19038	101119865
GO:0046044	TMP metabolic process	biological_process	0.15215	1	1	1056	3	19038	101119865
GO:0008113	peptide-methionine (S)-S-oxide reductase activity	molecular_function	0.15216	1	1	1056	3	19038	101117221
GO:0046782	regulation of viral transcription	biological_process	0.15256	1	1	1056	3	19038	101115254
GO:0004398	histidine decarboxylase activity	molecular_function	0.15278	1	1	1056	3	19038	101114859
GO:0042274	ribosomal small subunit biogenesis	biological_process	0.15278	1	1	1056	3	19038	780511
GO:0015947	methane metabolic process	biological_process	0.15279	1	3	1056	25	19038	1.01108e+26
GO:0043446	cellular alkane metabolic process	biological_process	0.15279	1	3	1056	25	19038	1.01103e+26
GO:0004126	cytidine deaminase activity	molecular_function	0.15297	1	1	1056	3	19038	101102378
GO:0006216	cytidine catabolic process	biological_process	0.15297	1	1	1056	3	19038	101102378
GO:0009972	cytidine deamination	biological_process	0.15297	1	1	1056	3	19038	101102378
GO:0046087	cytidine metabolic process	biological_process	0.15297	1	1	1056	3	19038	101102378
GO:0046133	pyrimidine ribonucleoside catabolic process	biological_process	0.15297	1	1	1056	3	19038	101102378
GO:0046135	pyrimidine nucleoside catabolic process	biological_process	0.15297	1	1	1056	3	19038	101102378
GO:0072529	pyrimidine-containing compound catabolic process	biological_process	0.15297	1	1	1056	3	19038	101102378
GO:0006545	glycine biosynthetic process	biological_process	0.15329	1	1	1056	3	19038	101117043
GO:0009070	serine family amino acid biosynthetic process	biological_process	0.15329	1	1	1056	3	19038	101117043
GO:0004489	methylenetetrahydrofolate reductase (NADPH) activity	molecular_function	0.1533	1	1	1056	3	19038	114108841
GO:0016073	snRNA metabolic process	biological_process	0.15342	1	1	1056	3	19038	101121962
GO:0016180	snRNA processing	biological_process	0.15342	1	1	1056	3	19038	101121962
GO:0034472	snRNA 3'-end processing	biological_process	0.15342	1	1	1056	3	19038	101121962
GO:0034477	U6 snRNA 3'-end processing	biological_process	0.15342	1	1	1056	3	19038	101121962
GO:0043628	ncRNA 3'-end processing	biological_process	0.15342	1	1	1056	3	19038	101121962
GO:0009636	response to toxic substance	biological_process	0.15355	1	4	1056	38	19038	1.0112e+35
GO:0042181	ketone biosynthetic process	biological_process	0.15384	1	2	1056	13	19038	1.01107e+17
GO:1901661	quinone metabolic process	biological_process	0.15384	1	2	1056	13	19038	1.01122e+17
GO:1901663	quinone biosynthetic process	biological_process	0.15384	1	2	1056	13	19038	1.01107e+17
GO:0070588	calcium ion transmembrane transport	biological_process	0.15387	1	2	1056	13	19038	1.01105e+17
GO:0015066	alpha-amylase inhibitor activity	molecular_function	0.15448	1	1	1056	3	19038	101108765
GO:0008645	hexose transport	biological_process	0.15544	1	2	1056	13	19038	101102366,XLOC_125215
GO:0016247	channel regulator activity	molecular_function	0.15565	1	11	1056	142	19038	1.01121e+95
GO:0004631	phosphomevalonate kinase activity	molecular_function	0.15573	1	1	1056	3	19038	101109104
GO:0006695	cholesterol biosynthetic process	biological_process	0.15573	1	1	1056	3	19038	101109104
GO:0016126	sterol biosynthetic process	biological_process	0.15573	1	1	1056	3	19038	101109104
GO:0004345	glucose-6-phosphate dehydrogenase activity	molecular_function	0.15611	1	1	1056	3	19038	101114124
GO:0044711	single-organism biosynthetic process	biological_process	0.15633	1	18	1056	253	19038	1.0111e+161
GO:0019074	viral RNA genome packaging	biological_process	0.15638	1	1	1056	3	19038	101121093
GO:0006813	potassium ion transport	biological_process	0.15647	1	12	1056	158	19038	1.01124e+107
GO:0004512	inositol-3-phosphate synthase activity	molecular_function	0.15665	1	1	1056	3	19038	101103983
GO:0006021	inositol biosynthetic process	biological_process	0.15665	1	1	1056	3	19038	101103983
GO:0046173	polyol biosynthetic process	biological_process	0.15665	1	1	1056	3	19038	101103983
GO:0005135	interleukin-3 receptor binding	molecular_function	0.15713	1	1	1056	3	19038	101122496
GO:0006760	folic acid-containing compound metabolic process	biological_process	0.15749	1	3	1056	25	19038	1.01105e+26
GO:0004161	dimethylallyltranstransferase activity	molecular_function	0.15749	1	1	1056	3	19038	101111964
GO:0008942	nitrite reductase [NAD(P)H] activity	molecular_function	0.15807	1	1	1056	3	19038	101118054
GO:0046857	oxidoreductase activity, acting on other nitrogenous compounds as donors, with NAD or NADP as acceptor	molecular_function	0.15807	1	1	1056	3	19038	101118054
GO:0030248	cellulose binding	molecular_function	0.16105	1	2	1056	13	19038	1.01118e+17
GO:0007623	circadian rhythm	biological_process	0.16105	1	2	1056	13	19038	1.2182e+17
GO:0050795	regulation of behavior	biological_process	0.1613	1	1	1056	3	19038	105612052
GO:0050920	regulation of chemotaxis	biological_process	0.1613	1	1	1056	3	19038	105612052
GO:0034457	Mpp10 complex	cellular_component	0.1626	1	2	1056	13	19038	1.14117e+17
GO:0051051	negative regulation of transport	biological_process	0.16276	1	3	1056	26	19038	XLOC_125215,114110560,101102366
GO:0008236	serine-type peptidase activity	molecular_function	0.16345	1	23	1056	334	19038	1.01122e+206
GO:0017171	serine hydrolase activity	molecular_function	0.16345	1	23	1056	334	19038	1.01115e+206
GO:0072511	divalent inorganic cation transport	biological_process	0.16415	1	11	1056	143	19038	1.01105e+98
GO:0005774	vacuolar membrane	cellular_component	0.16487	1	3	1056	26	19038	1.01107e+26
GO:0044437	vacuolar part	cellular_component	0.16487	1	3	1056	26	19038	1.01108e+26
GO:0033180	proton-transporting V-type ATPase, V1 domain	cellular_component	0.16487	1	3	1056	26	19038	1.01108e+26
GO:0016831	carboxy-lyase activity	molecular_function	0.16599	1	7	1056	83	19038	1.01114e+62
GO:0010038	response to metal ion	biological_process	0.16603	1	3	1056	26	19038	1.01112e+26
GO:0004016	adenylate cyclase activity	molecular_function	0.17162	1	2	1056	14	19038	1.01112e+17
GO:0005539	glycosaminoglycan binding	molecular_function	0.17168	1	4	1056	40	19038	4.43001e+29
GO:0006487	protein N-linked glycosylation	biological_process	0.17218	1	2	1056	14	19038	1.00038e+17
GO:0001503	ossification	biological_process	0.17286	1	3	1056	26	19038	1.0112e+23
GO:0046149	pigment catabolic process	biological_process	0.17413	1	2	1056	14	19038	1.01115e+17
GO:0008677	2-dehydropantoate 2-reductase activity	molecular_function	0.17568	1	2	1056	14	19038	1.01118e+17
GO:0005852	eukaryotic translation initiation factor 3 complex	cellular_component	0.17624	1	2	1056	14	19038	1.01113e+17
GO:0019054	modulation by virus of host process	biological_process	0.1767	1	4	1056	40	19038	114115360,114118872,XLOC_069361,101114615
GO:0044068	modulation by symbiont of host cellular process	biological_process	0.1767	1	4	1056	40	19038	XLOC_069361,114118872,101114615,114115360
GO:0045333	cellular respiration	biological_process	0.1772	1	8	1056	99	19038	1.05604e+71
GO:0031399	regulation of protein modification process	biological_process	0.17795	1	4	1056	40	19038	1.1411e+35
GO:0006948	induction by virus of host cell-cell fusion	biological_process	0.17838	1	2	1056	14	19038	101114615,XLOC_069361
GO:0032446	protein modification by small protein conjugation	biological_process	0.17851	1	6	1056	69	19038	1.01122e+53
GO:0044461	bacterial-type flagellum part	cellular_component	0.18091	1	2	1056	14	19038	101102047780452
GO:0030686	90S preribosome	cellular_component	0.18241	1	2	1056	14	19038	1.14117e+17
GO:0009117	nucleotide metabolic process	biological_process	0.18281	1	18	1056	259	19038	101105735,101115005,114116607,101119865,101123332,100302103,101118367,101104979,101122097,101119460,101108687,101117043,121819509,105616742,XLOC_069361,101111683,101120875,101114859
GO:0008200	ion channel inhibitor activity	molecular_function	0.18749	1	10	1056	132	19038	1.14118e+86
GO:0016248	channel inhibitor activity	molecular_function	0.18749	1	10	1056	132	19038	1.14118e+86
GO:0005886	plasma membrane	cellular_component	0.18792	1	26	1056	392	19038	101116646,101113744,101103958,101123578,114116085,101115114,101123528,101118819,101106373,101106408,114116078,114115360,106991302,101120935,101106362,101108724,101104978,101107908,101117600,114116088,114108725,101114097,101110936,100135696,101105735,114116113
GO:0008104	protein localization	biological_process	0.18915	1	50	1056	802	19038	101119619,101101879,101106631,101104887,101115680,101120572,101122306,101116769,100302360,114110560,101110809,101114648,101113504,101119870,101113077,101101892,101112734,101122615,101101940,101118296,101122054,101114615,101110893,101108027,101118583,101105547,101123169,114117822,101106160,101107055,101103792,101120350,101101929,101117600,101111508,101103411,101121962,101115974,101115883,101102047…
GO:0030120	vesicle coat	cellular_component	0.19061	1	5	1056	56	19038	1.01121e+44
GO:0030135	coated vesicle	cellular_component	0.19061	1	5	1056	56	19038	1.01112e+44
GO:0030662	coated vesicle membrane	cellular_component	0.19061	1	5	1056	56	19038	1.01123e+44
GO:0007266	Rho protein signal transduction	biological_process	0.19092	1	6	1056	72	19038	1.01102e+53
GO:0035023	regulation of Rho protein signal transduction	biological_process	0.19092	1	6	1056	72	19038	1.01121e+53
GO:0048013	ephrin receptor signaling pathway	biological_process	0.19131	1	2	1056	15	19038	1.01123e+17
GO:0019201	nucleotide kinase activity	molecular_function	0.19235	1	13	1056	179	19038	1.01122e+116
GO:0008201	heparin binding	molecular_function	0.19407	1	2	1056	15	19038	780460101111593
GO:0090544	BAF-type complex	cellular_component	0.19738	1	1	1056	4	19038	101115263
GO:0004074	biliverdin reductase activity	molecular_function	0.19739	1	1	1056	4	19038	101115278
GO:0042167	heme catabolic process	biological_process	0.19739	1	1	1056	4	19038	101115278
GO:0003883	CTP synthase activity	molecular_function	0.1974	1	1	1056	4	19038	101114859
GO:0000281	mitotic cytokinesis	biological_process	0.19741	1	1	1056	4	19038	101112734
GO:0040001	establishment of mitotic spindle localization	biological_process	0.19741	1	1	1056	4	19038	101112734
GO:0051293	establishment of spindle localization	biological_process	0.19741	1	1	1056	4	19038	101112734
GO:0051653	spindle localization	biological_process	0.19741	1	1	1056	4	19038	101112734
GO:0016708	oxidoreductase activity, acting on paired donors, with incorporation or reduction of molecular oxygen, NAD(P)H as one donor, and incorporation of two atoms of oxygen into one donor	molecular_function	0.19747	1	1	1056	4	19038	101120054
GO:0015925	galactosidase activity	molecular_function	0.19799	1	2	1056	15	19038	1.05604e+17
GO:0018189	pyrroloquinoline quinone biosynthetic process	biological_process	0.19825	1	1	1056	4	19038	101107196
GO:0018212	peptidyl-tyrosine modification	biological_process	0.19825	1	1	1056	4	19038	101107196
GO:0009129	pyrimidine nucleoside monophosphate metabolic process	biological_process	0.19897	1	1	1056	4	19038	101119865
GO:0009130	pyrimidine nucleoside monophosphate biosynthetic process	biological_process	0.19897	1	1	1056	4	19038	101119865
GO:0006888	ER to Golgi vesicle-mediated transport	biological_process	0.19952	1	4	1056	42	19038	1.01121e+35
GO:0007213	G-protein coupled acetylcholine receptor signaling pathway	biological_process	0.19956	1	1	1056	4	19038	101122306
GO:0043113	receptor clustering	biological_process	0.19956	1	1	1056	4	19038	101122306
GO:0043236	laminin binding	molecular_function	0.19956	1	1	1056	4	19038	101122306
GO:0072657	protein localization to membrane	biological_process	0.19956	1	1	1056	4	19038	101122306
GO:0004645	phosphorylase activity	molecular_function	0.19991	1	1	1056	4	19038	554320
GO:0008184	glycogen phosphorylase activity	molecular_function	0.19991	1	1	1056	4	19038	554320
GO:0030472	mitotic spindle organization in nucleus	biological_process	0.20008	1	1	1056	4	19038	101110893
GO:0018492	carbon-monoxide dehydrogenase (acceptor) activity	molecular_function	0.20038	1	1	1056	4	19038	101104266
GO:0019072	viral genome packaging	biological_process	0.20091	1	2	1056	15	19038	1.01121e+17
GO:0048511	rhythmic process	biological_process	0.20108	1	2	1056	15	19038	1.01105e+17
GO:0030659	cytoplasmic vesicle membrane	cellular_component	0.2011	1	5	1056	57	19038	1.01119e+44
GO:0006636	unsaturated fatty acid biosynthetic process	biological_process	0.20133	1	1	1056	4	19038	101121761
GO:0006690	icosanoid metabolic process	biological_process	0.20133	1	1	1056	4	19038	101121761
GO:0006691	leukotriene metabolic process	biological_process	0.20133	1	1	1056	4	19038	101121761
GO:0019370	leukotriene biosynthetic process	biological_process	0.20133	1	1	1056	4	19038	101121761
GO:0033559	unsaturated fatty acid metabolic process	biological_process	0.20133	1	1	1056	4	19038	101121761
GO:0046456	icosanoid biosynthetic process	biological_process	0.20133	1	1	1056	4	19038	101121761
GO:1901568	fatty acid derivative metabolic process	biological_process	0.20133	1	1	1056	4	19038	101121761
GO:1901570	fatty acid derivative biosynthetic process	biological_process	0.20133	1	1	1056	4	19038	101121761
GO:0006047	UDP-N-acetylglucosamine metabolic process	biological_process	0.20134	1	1	1056	4	19038	101108687
GO:0004057	arginyltransferase activity	molecular_function	0.20146	1	1	1056	4	19038	101110286
GO:0016598	protein arginylation	biological_process	0.20146	1	1	1056	4	19038	101110286
GO:0019205	nucleobase-containing compound kinase activity	molecular_function	0.2017	1	14	1056	197	19038	1.21816e+125
GO:0051213	dioxygenase activity	molecular_function	0.20274	1	6	1056	72	19038	1.01113e+53
GO:0042623	ATPase activity, coupled	molecular_function	0.2032	1	13	1056	182	19038	1.01115e+116
GO:0004609	phosphatidylserine decarboxylase activity	molecular_function	0.20322	1	1	1056	4	19038	101113438
GO:0048472	threonine-phosphate decarboxylase activity	molecular_function	0.20446	1	1	1056	4	19038	101107623
GO:0016661	oxidoreductase activity, acting on other nitrogenous compounds as donors	molecular_function	0.20448	1	1	1056	4	19038	101118054
GO:0005791	rough endoplasmic reticulum	cellular_component	0.20476	1	2	1056	15	19038	1.01111e+17
GO:0030867	rough endoplasmic reticulum membrane	cellular_component	0.20476	1	2	1056	15	19038	1.01111e+17
GO:0000976	transcription regulatory region sequence-specific DNA binding	molecular_function	0.20558	1	1	1056	4	19038	101107196
GO:0016592	mediator complex	cellular_component	0.20618	1	11	1056	151	19038	1.01112e+95
GO:0009251	glucan catabolic process	biological_process	0.2067	1	1	1056	4	19038	101113336
GO:0030245	cellulose catabolic process	biological_process	0.2067	1	1	1056	4	19038	101113336
GO:0044247	cellular polysaccharide catabolic process	biological_process	0.2067	1	1	1056	4	19038	101113336
GO:0051275	beta-glucan catabolic process	biological_process	0.2067	1	1	1056	4	19038	101113336
GO:0009317	acetyl-CoA carboxylase complex	cellular_component	0.20738	1	1	1056	4	19038	101106373
GO:0004557	alpha-galactosidase activity	molecular_function	0.20741	1	1	1056	4	19038	100145858
GO:0010257	NADH dehydrogenase complex assembly	biological_process	0.20939	1	1	1056	4	19038	101111245
GO:0032981	mitochondrial respiratory chain complex I assembly	biological_process	0.20939	1	1	1056	4	19038	101111245
GO:0097031	mitochondrial respiratory chain complex I biogenesis	biological_process	0.20939	1	1	1056	4	19038	101111245
GO:0006338	chromatin remodeling	biological_process	0.20956	1	3	1056	29	19038	1.14113e+26
GO:0004014	adenosylmethionine decarboxylase activity	molecular_function	0.21038	1	1	1056	4	19038	101113906
GO:0006595	polyamine metabolic process	biological_process	0.21038	1	1	1056	4	19038	101113906
GO:0006596	polyamine biosynthetic process	biological_process	0.21038	1	1	1056	4	19038	101113906
GO:0008216	spermidine metabolic process	biological_process	0.21038	1	1	1056	4	19038	101113906
GO:0008295	spermidine biosynthetic process	biological_process	0.21038	1	1	1056	4	19038	101113906
GO:0030133	transport vesicle	cellular_component	0.2113	1	5	1056	58	19038	1.01121e+44
GO:0033036	macromolecule localization	biological_process	0.21302	1	59	1056	967	19038	101122306,101120572,101115680,100302360,101116769,114110560,101110809,101114648,101119619,101101879,101106631,101104887,101101892,101112734,101106373,101110893,101114615,101101940,101122615,101118296,101122054,101118583,101108027,101115095,101113504,105612052,497271,101119870,101111901,101113077,101101929,101105069,101111508,101117600,101103411,101115974,101121962,101123169,101105547,101107055,10…
GO:0051607	defense response to virus	biological_process	0.21315	1	4	1056	43	19038	1.14113e+35
GO:0000105	histidine biosynthetic process	biological_process	0.21433	1	3	1056	29	19038	1.01104e+26
GO:0042558	pteridine-containing compound metabolic process	biological_process	0.21483	1	3	1056	29	19038	1.01105e+26
GO:0015749	monosaccharide transport	biological_process	0.21545	1	2	1056	16	19038	101102366,XLOC_125215
GO:0032502	developmental process	biological_process	0.21553	1	37	1056	585	19038	101117408,105605912,101123169,114116076,114116130,101121640,101113706,101122559,101112844,101119408,101114859,443168,105608906,101118159,114118382,101114012,101106741,114111269,101102712,101118778,101116203,101106490,101114341,101104863,101102171,101120412,100196905,101123014,443469,101114683,101119848,101107980,101118151,101104535,100135438,101115937,105605978
GO:0030261	chromosome condensation	biological_process	0.21609	1	2	1056	16	19038	1.14119e+17
GO:0042325	regulation of phosphorylation	biological_process	0.21627	1	4	1056	43	19038	1.01122e+35
GO:0006753	nucleoside phosphate metabolic process	biological_process	0.21792	1	18	1056	267	19038	101119865,101123332,101115005,114116607,101105735,101118367,100302103,121819509,101117043,105616742,101108687,101119460,101104979,101122097,101111683,101120875,101114859,XLOC_069361
GO:0019751	polyol metabolic process	biological_process	0.21846	1	2	1056	16	19038	1.01122e+17
GO:0022904	respiratory electron transport chain	biological_process	0.22529	1	5	1056	59	19038	1.00136e+44
GO:0034613	cellular protein localization	biological_process	0.22598	1	41	1056	661	19038	114110560,101114648,101110809,101122306,101115680,101120572,101116769,101106631,101101879,101104887,101119619,101114615,101110893,101122615,101101940,101118296,101118583,101108027,101101892,101113077,101113504,101115974,101121962,101101929,101111508,101117600,101120350,101103792,101123169,101106160,101107055,114117822,101121484,100359412,101110591,101109364,101111654,101114679,101110723,101102047…
GO:0070727	cellular macromolecule localization	biological_process	0.22598	1	41	1056	661	19038	101123169,101106160,101107055,114117822,101120350,101103792,101101929,101111508,101117600,101115974,101121962,101102047,101115883,101110723,101111654,101114679,101110591,101109364,101121484,100359412,101119619,101101879,101106631,101104887,101122306,101120572,101115680,101116769,114110560,101110809,101114648,101113504,101113077,101101892,101114615,101110893,101101940,101122615,101118296,101118583…
GO:0016503	pheromone receptor activity	molecular_function	0.22627	1	3	1056	29	19038	7.80448e+23
GO:0003916	DNA topoisomerase activity	molecular_function	0.22935	1	5	1056	60	19038	1.01111e+44
GO:0012506	vesicle membrane	cellular_component	0.23134	1	5	1056	60	19038	1.01121e+44
GO:0030658	transport vesicle membrane	cellular_component	0.23235	1	4	1056	45	19038	1.01121e+35
GO:0055114	oxidation-reduction process	biological_process	0.2348	1	76	1056	1274	19038	101115278,105613287,106990140,101108664,100170111,443078,101122521,101108604,101115797,114118047,105604882,101116260,101107641,101120054,101113346,101123649,101103257,101103472,101114097,101117509,101119865,101117221,101102644,101118148,101104908,101110351,114108597,101111046,101108864,105601907,101118398,105603772,101112384,101114518,101119041,101115974,101115005,100135696,101113685,114114084,10…
GO:0005887	integral to plasma membrane	cellular_component	0.23519	1	8	1056	107	19038	1.01124e+71
GO:0005088	Ras guanyl-nucleotide exchange factor activity	molecular_function	0.2355	1	6	1056	77	19038	1.01102e+53
GO:0005089	Rho guanyl-nucleotide exchange factor activity	molecular_function	0.2355	1	6	1056	77	19038	1.01102e+53
GO:0055036	virion membrane	cellular_component	0.23577	1	2	1056	17	19038	443519101110381
GO:0016011	dystroglycan complex	cellular_component	0.23752	1	2	1056	17	19038	1.01115e+17
GO:0016012	sarcoglycan complex	cellular_component	0.23752	1	2	1056	17	19038	1.01115e+17
GO:0030684	preribosome	cellular_component	0.23786	1	7	1056	91	19038	1.0111e+62
GO:0042221	response to chemical stimulus	biological_process	0.23821	1	19	1056	290	19038	1.00136e+170
GO:0009156	ribonucleoside monophosphate biosynthetic process	biological_process	0.2392	1	2	1056	17	19038	1.0112e+17
GO:0009161	ribonucleoside monophosphate metabolic process	biological_process	0.2392	1	2	1056	17	19038	1.01105e+17
GO:0043190	ATP-binding cassette (ABC) transporter complex	cellular_component	0.24032	1	1	1056	5	19038	105605636
GO:0072350	tricarboxylic acid metabolic process	biological_process	0.24114	1	1	1056	5	19038	101107196
GO:0072351	tricarboxylic acid biosynthetic process	biological_process	0.24114	1	1	1056	5	19038	101107196
GO:0009273	peptidoglycan-based cell wall biogenesis	biological_process	0.24137	1	1	1056	5	19038	101110286
GO:0006544	glycine metabolic process	biological_process	0.24169	1	1	1056	5	19038	101117043
GO:0006694	steroid biosynthetic process	biological_process	0.2418	1	3	1056	31	19038	1.0112e+26
GO:0015980	energy derivation by oxidation of organic compounds	biological_process	0.24215	1	8	1056	108	19038	1.14118e+71
GO:0015204	urea transmembrane transporter activity	molecular_function	0.24224	1	1	1056	5	19038	101105365
GO:0015840	urea transport	biological_process	0.24224	1	1	1056	5	19038	101105365
GO:0019755	one-carbon compound transport	biological_process	0.24224	1	1	1056	5	19038	101105365
GO:0042887	amide transmembrane transporter activity	molecular_function	0.24224	1	1	1056	5	19038	101105365
GO:0071918	urea transmembrane transport	biological_process	0.24224	1	1	1056	5	19038	101105365
GO:0072509	divalent inorganic cation transmembrane transporter activity	molecular_function	0.24225	1	12	1056	172	19038	1.0112e+107
GO:0010033	response to organic substance	biological_process	0.24247	1	8	1056	109	19038	1.01115e+71
GO:0005245	voltage-gated calcium channel activity	molecular_function	0.24256	1	1	1056	5	19038	101104978
GO:0015627	type II protein secretion system complex	cellular_component	0.24257	1	1	1056	5	19038	101122054
GO:0015628	protein secretion by the type II secretion system	biological_process	0.24257	1	1	1056	5	19038	101122054
GO:0046873	metal ion transmembrane transporter activity	molecular_function	0.24283	1	34	1056	545	19038	101110976,101114155,101107395,101114615,101115095,101113744,101107980,101108165,101123578,101113020,101105791,101119372,101120989,101113595,101116078,101123528,105608906,101108864,101117892,100302624,101121174,101120286,114114866,101121071,101103311,101104978,101111508,101102032,101104643,101120935,101112385,101111268,101113095,101103792
GO:0048598	embryonic morphogenesis	biological_process	0.24287	1	1	1056	5	19038	101102171
GO:0072669	tRNA-splicing ligase complex	cellular_component	0.24287	1	1	1056	5	19038	101102171
GO:0006084	acetyl-CoA metabolic process	biological_process	0.24315	1	1	1056	5	19038	101104266
GO:0006637	acyl-CoA metabolic process	biological_process	0.24315	1	1	1056	5	19038	101104266
GO:0035383	thioester metabolic process	biological_process	0.24315	1	1	1056	5	19038	101104266
GO:0031226	intrinsic to plasma membrane	cellular_component	0.24329	1	8	1056	108	19038	1.01121e+71
GO:0006926	virus-infected cell apoptotic process	biological_process	0.24421	1	1	1056	5	19038	114118872
GO:0012502	induction of programmed cell death	biological_process	0.24421	1	1	1056	5	19038	114118872
GO:0019051	induction by virus of host apoptotic process	biological_process	0.24421	1	1	1056	5	19038	114118872
GO:0031343	positive regulation of cell killing	biological_process	0.24421	1	1	1056	5	19038	114118872
GO:0043902	positive regulation of multi-organism process	biological_process	0.24421	1	1	1056	5	19038	114118872
GO:0044533	positive regulation of apoptotic process in other organism	biological_process	0.24421	1	1	1056	5	19038	114118872
GO:0051709	regulation of killing of cells of other organism	biological_process	0.24421	1	1	1056	5	19038	114118872
GO:0051712	positive regulation of killing of cells of other organism	biological_process	0.24421	1	1	1056	5	19038	114118872
GO:0052042	positive regulation by symbiont of host programmed cell death	biological_process	0.24421	1	1	1056	5	19038	114118872
GO:0052151	positive regulation by symbiont of host apoptotic process	biological_process	0.24421	1	1	1056	5	19038	114118872
GO:0052330	positive regulation by organism of programmed cell death in other organism involved in symbiotic interaction	biological_process	0.24421	1	1	1056	5	19038	114118872
GO:0052501	positive regulation by organism of apoptotic process in other organism involved in symbiotic interaction	biological_process	0.24421	1	1	1056	5	19038	114118872
GO:0060139	positive regulation of apoptotic process by virus	biological_process	0.24421	1	1	1056	5	19038	114118872
GO:0097285	cell-type specific apoptotic process	biological_process	0.24421	1	1	1056	5	19038	114118872
GO:0030507	spectrin binding	molecular_function	0.24434	1	1	1056	5	19038	101107980
GO:0016717	oxidoreductase activity, acting on paired donors, with oxidation of a pair of donors resulting in the reduction of molecular oxygen to two molecules of water	molecular_function	0.24571	1	1	1056	5	19038	101103257
GO:0044452	nucleolar part	cellular_component	0.24594	1	2	1056	17	19038	1.14117e+17
GO:0042132	fructose 1,6-bisphosphate 1-phosphatase activity	molecular_function	0.24673	1	1	1056	5	19038	101106243
GO:0008918	lipopolysaccharide 3-alpha-galactosyltransferase activity	molecular_function	0.24675	1	1	1056	5	19038	105608906
GO:0035250	UDP-galactosyltransferase activity	molecular_function	0.24675	1	1	1056	5	19038	105608906
GO:0030354	melanin-concentrating hormone activity	molecular_function	0.24676	1	1	1056	5	19038	101111396
GO:0002161	aminoacyl-tRNA editing activity	molecular_function	0.24763	1	1	1056	5	19038	101106890
GO:0004318	enoyl-[acyl-carrier-protein] reductase (NADH) activity	molecular_function	0.24782	1	1	1056	5	19038	101117221
GO:0002252	immune effector process	biological_process	0.24806	1	4	1056	46	19038	1.14113e+35
GO:0006020	inositol metabolic process	biological_process	0.24874	1	1	1056	5	19038	101103983
GO:0030896	checkpoint clamp complex	cellular_component	0.24877	1	1	1056	5	19038	443155
GO:0016774	phosphotransferase activity, carboxyl group as acceptor	molecular_function	0.24924	1	1	1056	5	19038	100216440
GO:0005201	extracellular matrix structural constituent	molecular_function	0.25017	1	3	1056	32	19038	101106322,XLOC_114822,100196905
GO:0002694	regulation of leukocyte activation	biological_process	0.25048	1	1	1056	5	19038	101110725
GO:0050865	regulation of cell activation	biological_process	0.25048	1	1	1056	5	19038	101110725
GO:0051249	regulation of lymphocyte activation	biological_process	0.25048	1	1	1056	5	19038	101110725
GO:0010851	cyclase regulator activity	molecular_function	0.25157	1	1	1056	5	19038	101101892
GO:0010853	cyclase activator activity	molecular_function	0.25157	1	1	1056	5	19038	101101892
GO:0030249	guanylate cyclase regulator activity	molecular_function	0.25157	1	1	1056	5	19038	101101892
GO:0030250	guanylate cyclase activator activity	molecular_function	0.25157	1	1	1056	5	19038	101101892
GO:0009309	amine biosynthetic process	biological_process	0.25262	1	1	1056	5	19038	101113906
GO:0042401	cellular biogenic amine biosynthetic process	biological_process	0.25262	1	1	1056	5	19038	101113906
GO:0003896	DNA primase activity	molecular_function	0.25323	1	3	1056	32	19038	1.01117e+26
GO:0006720	isoprenoid metabolic process	biological_process	0.25452	1	4	1056	47	19038	1.00146e+35
GO:0008299	isoprenoid biosynthetic process	biological_process	0.25452	1	4	1056	47	19038	1.01119e+35
GO:0006787	porphyrin-containing compound catabolic process	biological_process	0.2553	1	2	1056	18	19038	1.01115e+17
GO:0033015	tetrapyrrole catabolic process	biological_process	0.2553	1	2	1056	18	19038	1.01115e+17
GO:0018142	protein-DNA covalent cross-linking	biological_process	0.2557	1	1	1056	5	19038	101123336
GO:0009060	aerobic respiration	biological_process	0.25759	1	2	1056	18	19038	1.01109e+17
GO:0000921	septin ring assembly	biological_process	0.25773	1	3	1056	32	19038	1.01123e+26
GO:0005940	septin ring	cellular_component	0.25773	1	3	1056	32	19038	1.14115e+26
GO:0031106	septin ring organization	biological_process	0.25773	1	3	1056	32	19038	1.01123e+26
GO:0032156	septin cytoskeleton	cellular_component	0.25773	1	3	1056	32	19038	1.14115e+26
GO:0032185	septin cytoskeleton organization	biological_process	0.25773	1	3	1056	32	19038	1.01123e+26
GO:1901607	alpha-amino acid biosynthetic process	biological_process	0.25866	1	7	1056	94	19038	1.0111e+62
GO:0009124	nucleoside monophosphate biosynthetic process	biological_process	0.2601	1	2	1056	18	19038	1.0112e+17
GO:0003013	circulatory system process	biological_process	0.26046	1	2	1056	18	19038	1.01123e+17
GO:0003018	vascular process in circulatory system	biological_process	0.26046	1	2	1056	18	19038	1.01107e+17
GO:0008015	blood circulation	biological_process	0.26046	1	2	1056	18	19038	1.01107e+17
GO:0035150	regulation of tube size	biological_process	0.26046	1	2	1056	18	19038	1.01123e+17
GO:0050880	regulation of blood vessel size	biological_process	0.26046	1	2	1056	18	19038	1.01123e+17
GO:0008641	small protein activating enzyme activity	molecular_function	0.26102	1	2	1056	18	19038	1.01115e+17
GO:0009405	pathogenesis	biological_process	0.26218	1	27	1056	430	19038	101105151,101115572,101103983,101102480,101106428,101110699,101105860,101111508,101117600,101122306,101112070,101110381,101121188,101102047,101114859,492300,114118738,101111721,101119091,101104072,114117880,101109364,101123528,101105321,101108864,100192427,101122097
GO:0045261	proton-transporting ATP synthase complex, catalytic core F(1)	cellular_component	0.26251	1	2	1056	18	19038	1.00302e+17
GO:0035556	intracellular signal transduction	biological_process	0.2629	1	48	1056	797	19038	101114452,101119014,105604930,100145877,101110078,101112187,114109630,101104660,101104846,101111683,101106382,101117602,101115534,101113595,101105735,101107078,101110397,101114341,101108118,101103716,101123365,100302303,101110699,101104720,101120630,101118410,101109765,101122297,100302084,106991182,101105574,101123321,101120830,101115374,101121257,105616456,101109364,101120796,114118738,101117358…
GO:0016702	oxidoreductase activity, acting on single donors with incorporation of molecular oxygen, incorporation of two atoms of oxygen	molecular_function	0.26353	1	4	1056	47	19038	1.01117e+35
GO:0010466	negative regulation of peptidase activity	biological_process	0.26385	1	2	1056	18	19038	1.01103e+17
GO:0010951	negative regulation of endopeptidase activity	biological_process	0.26385	1	2	1056	18	19038	1.05606e+17
GO:0046914	transition metal ion binding	molecular_function	0.26498	1	117	1056	2010	19038	101123649,101120054,101113346,105610305,101114658,101118205,101120301,101110699,101120572,101119088,101121761,101111593,101110809,101103714,106990140,101106681,114110562,101113358,101117336,101116733,101115278,105613287,106991171,101110976,101116741,101106373,105604882,101114452,114117799,101122615,101108604,101122521,101106425,101119014,100170111,101119041,114112680,101119938,101107593,101123079…
GO:0015085	calcium ion transmembrane transporter activity	molecular_function	0.26955	1	5	1056	63	19038	1.01109e+44
GO:0044281	small molecule metabolic process	biological_process	0.27039	1	49	1056	814	19038	101118367,101103983,100302103,101104144,101109811,101105117,101123332,101115005,101115974,101113871,101114859,101120875,101102378,101119091,101104908,XLOC_069361,101109224,101122194,121819509,101117043,101109364,101116528,101107196,114108841,101122097,101113998,101109104,101121954,101119865,101106890,105605809,101105429,114116607,114110625,101105735,100188975,101121761,101111683,105613287,1011063…
GO:0005246	calcium channel regulator activity	molecular_function	0.27064	1	3	1056	33	19038	1.01105e+26
GO:0016023	cytoplasmic membrane-bounded vesicle	cellular_component	0.27309	1	7	1056	96	19038	1.01111e+59
GO:0004518	nuclease activity	molecular_function	0.27383	1	23	1056	364	19038	101116260,101116513,101106373,101117900,101114615,101122097,101105406,101117078,101115762,101115506,XLOC_069361,101106681,101115129,101121486,101106415,101116988,101116203,101115827,101111593,114116607,101121962,101119719,101107041
GO:0030955	potassium ion binding	molecular_function	0.27411	1	5	1056	64	19038	1.01121e+44
GO:0031420	alkali metal ion binding	molecular_function	0.27411	1	5	1056	64	19038	1.01108e+44
GO:0042180	cellular ketone metabolic process	biological_process	0.27498	1	2	1056	19	19038	1.01107e+17
GO:0009615	response to virus	biological_process	0.27689	1	5	1056	64	19038	1.14113e+44
GO:0051187	cofactor catabolic process	biological_process	0.27763	1	2	1056	19	19038	1.01116e+17
GO:0015459	potassium channel regulator activity	molecular_function	0.2777	1	2	1056	19	19038	1.01109e+17
GO:0019870	potassium channel inhibitor activity	molecular_function	0.2777	1	2	1056	19	19038	1.01122e+17
GO:0005227	calcium activated cation channel activity	molecular_function	0.27881	1	3	1056	34	19038	1.01121e+26
GO:0015269	calcium-activated potassium channel activity	molecular_function	0.27881	1	3	1056	34	19038	1.01119e+26
GO:0019888	protein phosphatase regulator activity	molecular_function	0.27978	1	2	1056	19	19038	1.01104e+17
GO:0016701	oxidoreductase activity, acting on single donors with incorporation of molecular oxygen	molecular_function	0.27996	1	5	1056	64	19038	1.01114e+44
GO:0010035	response to inorganic substance	biological_process	0.28039	1	3	1056	34	19038	1.01112e+26
GO:0006555	methionine metabolic process	biological_process	0.28205	1	1	1056	6	19038	114108841
GO:0045444	fat cell differentiation	biological_process	0.28225	1	2	1056	19	19038	1.01122e+17
GO:0004146	dihydrofolate reductase activity	molecular_function	0.28255	1	1	1056	6	19038	101117043
GO:0019068	virion assembly	biological_process	0.28283	1	8	1056	112	19038	1.01115e+71
GO:0031047	gene silencing by RNA	biological_process	0.28354	1	1	1056	6	19038	101110621
GO:0030177	positive regulation of Wnt receptor signaling pathway	biological_process	0.28377	1	1	1056	6	19038	114114525
GO:0060070	canonical Wnt receptor signaling pathway	biological_process	0.28377	1	1	1056	6	19038	114114525
GO:0060828	regulation of canonical Wnt receptor signaling pathway	biological_process	0.28377	1	1	1056	6	19038	114114525
GO:0090263	positive regulation of canonical Wnt receptor signaling pathway	biological_process	0.28377	1	1	1056	6	19038	114114525
GO:0051056	regulation of small GTPase mediated signal transduction	biological_process	0.28411	1	7	1056	99	19038	1.01122e+62
GO:0035737	injection of substance in to other organism	biological_process	0.28417	1	1	1056	6	19038	101104887
GO:0035738	envenomation resulting in modification of morphology or physiology of other organism	biological_process	0.28417	1	1	1056	6	19038	101104887
GO:0044559	envenomation resulting in modulation of voltage-gated potassium channel activity in other organism	biological_process	0.28417	1	1	1056	6	19038	101104887
GO:0044560	envenomation resulting in modulation of ion channel activity in other organism	biological_process	0.28417	1	1	1056	6	19038	101104887
GO:0044562	envenomation resulting in negative regulation of voltage-gated potassium channel activity in other organism	biological_process	0.28417	1	1	1056	6	19038	101104887
GO:0044564	envenomation resulting in occlusion of the pore of voltage-gated potassium channel in other organism	biological_process	0.28417	1	1	1056	6	19038	101104887
GO:0004594	pantothenate kinase activity	molecular_function	0.2844	1	1	1056	6	19038	101109811
GO:0004867	serine-type endopeptidase inhibitor activity	molecular_function	0.28473	1	5	1056	65	19038	1.14118e+44
GO:0032266	phosphatidylinositol-3-phosphate binding	molecular_function	0.28476	1	1	1056	6	19038	101103774
GO:0006066	alcohol metabolic process	biological_process	0.28531	1	3	1056	34	19038	1.01104e+26
GO:0042438	melanin biosynthetic process	biological_process	0.28575	1	1	1056	6	19038	101107672
GO:0046189	phenol-containing compound biosynthetic process	biological_process	0.28575	1	1	1056	6	19038	101107672
GO:0009719	response to endogenous stimulus	biological_process	0.28584	1	7	1056	98	19038	1.01123e+62
GO:0047961	glycine N-acyltransferase activity	molecular_function	0.28592	1	1	1056	6	19038	101122097
GO:0000070	mitotic sister chromatid segregation	biological_process	0.2864	1	1	1056	6	19038	114118686
GO:0000796	condensin complex	cellular_component	0.2864	1	1	1056	6	19038	114118686
GO:0000819	sister chromatid segregation	biological_process	0.2864	1	1	1056	6	19038	114118686
GO:0007076	mitotic chromosome condensation	biological_process	0.2864	1	1	1056	6	19038	114118686
GO:0009225	nucleotide-sugar metabolic process	biological_process	0.28665	1	1	1056	6	19038	101108687
GO:0008203	cholesterol metabolic process	biological_process	0.2868	1	1	1056	6	19038	101109104
GO:0070273	phosphatidylinositol-4-phosphate binding	molecular_function	0.28694	1	1	1056	6	19038	101107318
GO:0016830	carbon-carbon lyase activity	molecular_function	0.28697	1	7	1056	98	19038	1.01124e+62
GO:0008653	lipopolysaccharide metabolic process	biological_process	0.28712	1	1	1056	6	19038	105608906
GO:0009103	lipopolysaccharide biosynthetic process	biological_process	0.28712	1	1	1056	6	19038	105608906
GO:0031344	regulation of cell projection organization	biological_process	0.28714	1	1	1056	6	19038	101119818
GO:0060491	regulation of cell projection assembly	biological_process	0.28714	1	1	1056	6	19038	101119818
GO:1902115	regulation of organelle assembly	biological_process	0.28714	1	1	1056	6	19038	101119818
GO:1902208	regulation of bacterial-type flagellum assembly	biological_process	0.28714	1	1	1056	6	19038	101119818
GO:0009288	bacterial-type flagellum	cellular_component	0.28782	1	4	1056	49	19038	1.14115e+32
GO:0018580	nitronate monooxygenase activity	molecular_function	0.28801	1	1	1056	6	19038	101104144
GO:0031341	regulation of cell killing	biological_process	0.28838	1	1	1056	6	19038	114118872
GO:0031214	biomineral tissue development	biological_process	0.28846	1	1	1056	6	19038	101120412
GO:0070167	regulation of biomineral tissue development	biological_process	0.28846	1	1	1056	6	19038	101120412
GO:0042025	host cell nucleus	cellular_component	0.28884	1	8	1056	114	19038	1.1411e+68
GO:0032040	small-subunit processome	cellular_component	0.28922	1	6	1056	81	19038	1.01116e+53
GO:0030243	cellulose metabolic process	biological_process	0.28931	1	1	1056	6	19038	101113336
GO:0032797	SMN complex	cellular_component	0.28956	1	1	1056	6	19038	121817857
GO:0005849	mRNA cleavage factor complex	cellular_component	0.28987	1	1	1056	6	19038	101104660
GO:0006378	mRNA polyadenylation	biological_process	0.28987	1	1	1056	6	19038	101104660
GO:0003989	acetyl-CoA carboxylase activity	molecular_function	0.28991	1	1	1056	6	19038	101106373
GO:0016421	CoA carboxylase activity	molecular_function	0.28991	1	1	1056	6	19038	101106373
GO:0016885	ligase activity, forming carbon-carbon bonds	molecular_function	0.28991	1	1	1056	6	19038	101106373
GO:0015031	protein transport	biological_process	0.29025	1	43	1056	716	19038	101105547,101123169,101107055,101106160,114117822,101120350,101103792,101101929,101111508,101117600,101103411,101115974,101121962,101102047,101115883,101114679,101111654,101110723,101110591,101121793,101109364,114115360,100359412,105616092,101106631,101101879,101104887,101120572,101115680,100302360,101116769,114110560,101113504,101119870,101101892,101114615,101110893,101122054,101122615,101118296…
GO:0001076	RNA polymerase II transcription factor binding transcription factor activity	molecular_function	0.29291	1	10	1056	148	19038	1.01122e+86
GO:0001104	RNA polymerase II transcription cofactor activity	molecular_function	0.29291	1	10	1056	148	19038	1.01102e+86
GO:0040007	growth	biological_process	0.29294	1	6	1056	81	19038	1.01122e+47
GO:0030695	GTPase regulator activity	molecular_function	0.29348	1	14	1056	217	19038	1.01121e+125
GO:0019073	viral DNA genome packaging	biological_process	0.29356	1	1	1056	6	19038	101102351
GO:0050662	coenzyme binding	molecular_function	0.2947	1	19	1056	301	19038	1.01121e+164
GO:0004519	endonuclease activity	molecular_function	0.29474	1	11	1056	164	19038	101115827,114116607,101116203,101106415,101107041,101121486,XLOC_069361,101115506,101117078,101115762,101105406
GO:0009116	nucleoside metabolic process	biological_process	0.29528	1	13	1056	198	19038	1.01117e+116
GO:1901657	glycosyl compound metabolic process	biological_process	0.29528	1	13	1056	198	19038	1.01123e+116
GO:0030176	integral to endoplasmic reticulum membrane	cellular_component	0.29799	1	4	1056	50	19038	1.01122e+35
GO:0031227	intrinsic to endoplasmic reticulum membrane	cellular_component	0.29799	1	4	1056	50	19038	1.01122e+35
GO:0044710	single-organism metabolic process	biological_process	0.29915	1	131	1056	2282	19038	101112384,101119041,101113685,101115005,101115974,101105117,101123332,101109811,XLOC_069361,101110351,101122194,114118432,101102378,101115927,105601907,101111046,101118398,121819509,101103472,101123649,101113998,101121761,101105429,101106890,101117221,106990140,101111683,101114996,101114703,101108604,101106373,105604882,101115797,101112942,101103983,101119116,443335,101113251,101105505,101111268,…
GO:0031988	membrane-bounded vesicle	cellular_component	0.29941	1	7	1056	99	19038	1.01111e+59
GO:0006265	DNA topological change	biological_process	0.30037	1	4	1056	51	19038	1.0112e+35
GO:0045184	establishment of protein localization	biological_process	0.30303	1	43	1056	720	19038	101101879,101106631,101104887,114110560,101120572,101115680,101116769,100302360,101119870,101113504,101110893,101114615,101118296,101122615,101122054,101101940,101118583,101108027,101101892,101120350,101103792,101105547,101123169,101106160,101107055,114117822,101103411,101115974,101121962,101101929,101111508,101117600,101110723,101114679,101111654,101102047,101115883,114115360,105616092,100359412…
GO:0031640	killing of cells of other organism	biological_process	0.30309	1	2	1056	20	19038	1.01112e+17
GO:0044364	disruption of cells of other organism	biological_process	0.30309	1	2	1056	20	19038	1.01112e+17
GO:0032101	regulation of response to external stimulus	biological_process	0.30315	1	2	1056	20	19038	1.05612e+17
GO:0031225	anchored to membrane	cellular_component	0.30458	1	2	1056	20	19038	1.01106e+17
GO:0006633	fatty acid biosynthetic process	biological_process	0.30494	1	3	1056	35	19038	1.01106e+26
GO:0009605	response to external stimulus	biological_process	0.30624	1	9	1056	132	19038	1.05612e+80
GO:0003682	chromatin binding	molecular_function	0.30644	1	5	1056	66	19038	105615356,XLOC_091011,101110976,101121093,101119775
GO:0006935	chemotaxis	biological_process	0.3071	1	5	1056	67	19038	1.00136e+44
GO:0004180	carboxypeptidase activity	molecular_function	0.30815	1	3	1056	36	19038	1.01104e+26
GO:0030001	metal ion transport	biological_process	0.3083	1	32	1056	529	19038	101121071,114114866,101103311,101105216,101104978,101111508,101102032,101112385,101113095,101103792,101123528,105608906,101108864,101107815,101117892,100302624,101121174,101120286,101113020,101105791,101119372,101113595,101114155,101114773,101107395,101114615,101118054,101115095,101113744,101107980,101108165,101123578
GO:0005732	small nucleolar ribonucleoprotein complex	cellular_component	0.3091	1	2	1056	20	19038	1.14117e+17
GO:0016651	oxidoreductase activity, acting on NAD(P)H	molecular_function	0.31005	1	12	1056	184	19038	1.05602e+107
GO:0006886	intracellular protein transport	biological_process	0.31016	1	34	1056	564	19038	101123169,101107055,101106160,114117822,101120350,101103792,101101929,101111508,101117600,101115974,101121962,101102047,101115883,101111654,101114679,101110723,101110591,101109364,100359412,101101879,101106631,101104887,101115680,101120572,101116769,101113504,101101892,101110893,101114615,101101940,101122615,101118296,101118583,101108027
GO:0000902	cell morphogenesis	biological_process	0.31281	1	7	1056	100	19038	1.01116e+62
GO:0032989	cellular component morphogenesis	biological_process	0.31281	1	7	1056	100	19038	1.01114e+62
GO:0005635	nuclear envelope	cellular_component	0.31456	1	3	1056	36	19038	1.0112e+26
GO:0006721	terpenoid metabolic process	biological_process	0.31499	1	3	1056	36	19038	1.01118e+26
GO:0016114	terpenoid biosynthetic process	biological_process	0.31499	1	3	1056	36	19038	1.00146e+26
GO:0052689	carboxylic ester hydrolase activity	molecular_function	0.31526	1	4	1056	52	19038	1.01124e+35
GO:0009991	response to extracellular stimulus	biological_process	0.31556	1	4	1056	51	19038	1.01116e+35
GO:0031668	cellular response to extracellular stimulus	biological_process	0.31556	1	4	1056	51	19038	1.1411e+35
GO:0071496	cellular response to external stimulus	biological_process	0.31556	1	4	1056	51	19038	1.0111e+35
GO:0042330	taxis	biological_process	0.3179	1	5	1056	68	19038	1.01114e+44
GO:0016668	oxidoreductase activity, acting on a sulfur group of donors, NAD(P) as acceptor	molecular_function	0.31943	1	6	1056	85	19038	1.06991e+53
GO:0047134	protein-disulfide reductase activity	molecular_function	0.31943	1	6	1056	85	19038	1.06991e+53
GO:0046034	ATP metabolic process	biological_process	0.31954	1	6	1056	84	19038	1.01118e+53
GO:0004470	malic enzyme activity	molecular_function	0.31957	1	1	1056	7	19038	101115188
GO:0004471	malate dehydrogenase (decarboxylating) activity	molecular_function	0.31957	1	1	1056	7	19038	101115188
GO:0072330	monocarboxylic acid biosynthetic process	biological_process	0.31984	1	3	1056	36	19038	1.01106e+26
GO:0019208	phosphatase regulator activity	molecular_function	0.32008	1	2	1056	21	19038	1.0111e+17
GO:0033647	host intracellular organelle	cellular_component	0.32087	1	8	1056	118	19038	1.0112e+68
GO:0033648	host intracellular membrane-bounded organelle	cellular_component	0.32087	1	8	1056	118	19038	1.01117e+68
GO:0004484	mRNA guanylyltransferase activity	molecular_function	0.32171	1	1	1056	7	19038	101116202
GO:0006370	7-methylguanosine mRNA capping	biological_process	0.32171	1	1	1056	7	19038	101116202
GO:0018836	alkylmercury lyase activity	molecular_function	0.32214	1	1	1056	7	19038	101104474
GO:0018941	organomercury metabolic process	biological_process	0.32214	1	1	1056	7	19038	101104474
GO:0018942	organometal metabolic process	biological_process	0.32214	1	1	1056	7	19038	101104474
GO:0046413	organomercury catabolic process	biological_process	0.32214	1	1	1056	7	19038	101104474
GO:0009123	nucleoside monophosphate metabolic process	biological_process	0.32271	1	2	1056	21	19038	1.0112e+17
GO:0030089	phycobilisome	cellular_component	0.32381	1	1	1056	7	19038	101118167
GO:0045048	protein insertion into ER membrane	biological_process	0.32382	1	1	1056	7	19038	101113077
GO:0071816	tail-anchored membrane protein insertion into ER membrane	biological_process	0.32382	1	1	1056	7	19038	101113077
GO:0005388	calcium-transporting ATPase activity	molecular_function	0.32408	1	1	1056	7	19038	101111268
GO:0008218	bioluminescence	biological_process	0.32428	1	1	1056	7	19038	101117509
GO:0004984	olfactory receptor activity	molecular_function	0.32438	1	1	1056	7	19038	101122570
GO:0004860	protein kinase inhibitor activity	molecular_function	0.32439	1	3	1056	36	19038	1.01106e+26
GO:0019210	kinase inhibitor activity	molecular_function	0.32439	1	3	1056	36	19038	1.01103e+26
GO:0048029	monosaccharide binding	molecular_function	0.3244	1	1	1056	7	19038	443048
GO:1901135	carbohydrate derivative metabolic process	biological_process	0.32477	1	31	1056	515	19038	XLOC_069361,101111683,101114703,101102378,101120875,101104979,101103203,114118046,101122097,101108687,101116528,101119460,121819509,105616742,105608906,101104887,101104089,101117633,100302103,101106160,101118367,101105735,114110625,114116607,101115005,101105429,100188975,100037660,101104144,101119865,101123332
GO:0001906	cell killing	biological_process	0.32504	1	2	1056	21	19038	1.01112e+17
GO:0003922	GMP synthase (glutamine-hydrolyzing) activity	molecular_function	0.32607	1	1	1056	7	19038	101104979
GO:0006177	GMP biosynthetic process	biological_process	0.32607	1	1	1056	7	19038	101104979
GO:0046037	GMP metabolic process	biological_process	0.32607	1	1	1056	7	19038	101104979
GO:0004371	glycerone kinase activity	molecular_function	0.32616	1	1	1056	7	19038	101122194
GO:0006071	glycerol metabolic process	biological_process	0.32616	1	1	1056	7	19038	101122194
GO:0006537	glutamate biosynthetic process	biological_process	0.32622	1	1	1056	7	19038	101104144
GO:0043650	dicarboxylic acid biosynthetic process	biological_process	0.32622	1	1	1056	7	19038	101104144
GO:0016817	hydrolase activity, acting on acid anhydrides	molecular_function	0.32667	1	62	1056	1063	19038	101108241,101111066,101120796,101120875,101106317,101123321,101104461,114115360,105608906,101106209,101111322,101121697,101109364,101102343,100302103,101119116,101120032,101104051,101119938,101111268,101105151,101118367,101102259,780452,101116317,101115005,101101915,101108399,114114866,101106047,101107908,101120116,100145877,101110499,101121740,101111069,101113744,101113504,101104745,101107395,10…
GO:0051287	NAD binding	molecular_function	0.327	1	7	1056	102	19038	1.01121e+62
GO:0007265	Ras protein signal transduction	biological_process	0.32703	1	6	1056	87	19038	1.0111e+53
GO:0046578	regulation of Ras protein signal transduction	biological_process	0.32703	1	6	1056	87	19038	1.01102e+53
GO:0032994	protein-lipid complex	cellular_component	0.32726	1	1	1056	7	19038	101111268
GO:0034358	plasma lipoprotein particle	cellular_component	0.32726	1	1	1056	7	19038	101111268
GO:0042627	chylomicron	cellular_component	0.32726	1	1	1056	7	19038	101111268
GO:0016872	intramolecular lyase activity	molecular_function	0.32752	1	1	1056	7	19038	101103983
GO:0009424	bacterial-type flagellum hook	cellular_component	0.32762	1	1	1056	7	19038	101102047
GO:0008384	IkappaB kinase activity	molecular_function	0.32766	1	1	1056	7	19038	101104167
GO:0002115	store-operated calcium entry	biological_process	0.32831	1	1	1056	7	19038	101114773
GO:0010959	regulation of metal ion transport	biological_process	0.32831	1	1	1056	7	19038	101114773
GO:0043269	regulation of ion transport	biological_process	0.32831	1	1	1056	7	19038	101114773
GO:0051924	regulation of calcium ion transport	biological_process	0.32831	1	1	1056	7	19038	101114773
GO:2001256	regulation of store-operated calcium entry	biological_process	0.32831	1	1	1056	7	19038	101114773
GO:0005185	neurohypophyseal hormone activity	molecular_function	0.32847	1	1	1056	7	19038	121820202
GO:0009379	Holliday junction helicase complex	cellular_component	0.32919	1	1	1056	7	19038	101115254
GO:0048476	Holliday junction resolvase complex	cellular_component	0.32919	1	1	1056	7	19038	101115254
GO:0071944	cell periphery	cellular_component	0.32997	1	37	1056	621	19038	101123528,101106408,443168,114116078,114115360,101117600,101104978,101107908,114108725,101121188,101110936,100135696,114116088,114116113,101123169,101120935,101108724,101115114,101110976,101106373,101118819,101101940,101116646,101114683,101113744,497271,101103958,114116085,101123014,101123578,443469,101120572,101114097,114110560,101105735,106991302,101106362
GO:0044262	cellular carbohydrate metabolic process	biological_process	0.33093	1	4	1056	53	19038	1.05609e+35
GO:0044275	cellular carbohydrate catabolic process	biological_process	0.33125	1	1	1056	7	19038	101113336
GO:0070647	protein modification by small protein conjugation or removal	biological_process	0.33138	1	9	1056	136	19038	1.0111e+80
GO:0015103	inorganic anion transmembrane transporter activity	molecular_function	0.3315	1	3	1056	37	19038	1.0112e+26
GO:0008661	1-deoxy-D-xylulose-5-phosphate synthase activity	molecular_function	0.33215	1	1	1056	7	19038	100145857
GO:0016744	transferase activity, transferring aldehyde or ketonic groups	molecular_function	0.33215	1	1	1056	7	19038	100145857
GO:0009425	bacterial-type flagellum basal body	cellular_component	0.33223	1	1	1056	7	19038	780452
GO:0008810	cellulase activity	molecular_function	0.33311	1	1	1056	7	19038	101113336
GO:0009164	nucleoside catabolic process	biological_process	0.33315	1	2	1056	22	19038	1.01122e+17
GO:0042454	ribonucleoside catabolic process	biological_process	0.33315	1	2	1056	22	19038	1.01102e+17
GO:1901658	glycosyl compound catabolic process	biological_process	0.33315	1	2	1056	22	19038	1.01102e+17
GO:0006613	cotranslational protein targeting to membrane	biological_process	0.33368	1	4	1056	53	19038	1.01105e+35
GO:0009259	ribonucleotide metabolic process	biological_process	0.33636	1	11	1056	171	19038	1.00302e+98
GO:0019693	ribose phosphate metabolic process	biological_process	0.33636	1	11	1056	171	19038	1.01105e+98
GO:0016053	organic acid biosynthetic process	biological_process	0.3373	1	11	1056	171	19038	1.01122e+98
GO:0046394	carboxylic acid biosynthetic process	biological_process	0.3373	1	11	1056	171	19038	1.01105e+98
GO:0007031	peroxisome organization	biological_process	0.33884	1	2	1056	22	19038	1.01108e+17
GO:0019033	viral tegument	cellular_component	0.33936	1	2	1056	22	19038	494440106991171
GO:0019067	viral assembly, maturation, egress, and release	biological_process	0.33978	1	9	1056	136	19038	1.01115e+80
GO:0005216	ion channel activity	molecular_function	0.34016	1	29	1056	486	19038	101108165,101118499,101110536,101115095,101113744,100302624,101117078,101107980,101121174,101117892,101108864,114118046,101110976,101123528,101118819,101120348,101105466,101111082,101120989,101102032,101119372,101113595,101104643,114116113,101121071,101112012,101111508,101104978,101110267
GO:0022838	substrate-specific channel activity	molecular_function	0.34016	1	29	1056	486	19038	101117892,101108864,114118046,101110976,101123528,101118819,101108165,101118499,101110536,101113744,101115095,100302624,101107980,101117078,101121174,101120989,101102032,101119372,101104643,101113595,114116113,101121071,101112012,101104978,101111508,101110267,101105466,101120348,101111082
GO:0044428	nuclear part	cellular_component	0.34043	1	42	1056	711	19038	101102976,101119854,101104487,114113008,101114511,114113147,114112826,101119619,101108604,101110893,101110976,101106373,114112824,114117337,101119036,101110342,443469,101106068,114112825,101104660,101115263,101119848,101110936,114113005,101111979,114112822,101102343,101108724,114113207,101120350,114116130,101122097,114115360,101113034,114112829,101109924,114113264,101120428,101119408,443155,10110…
GO:0005787	signal peptidase complex	cellular_component	0.34265	1	2	1056	22	19038	1.01111e+17
GO:0006465	signal peptide processing	biological_process	0.34265	1	2	1056	22	19038	1.01118e+17
GO:0005938	cell cortex	cellular_component	0.34266	1	7	1056	104	19038	1.14115e+62
GO:0001664	G-protein coupled receptor binding	molecular_function	0.34331	1	5	1056	68	19038	4.4338e+41
GO:0006221	pyrimidine nucleotide biosynthetic process	biological_process	0.34362	1	2	1056	22	19038	1.01115e+17
GO:0007049	cell cycle	biological_process	0.34418	1	31	1056	515	19038	114113147,114112826,114113207,101122875,101122455,101102973,101114326,114113005,101113020,114113008,101103311,114112822,497271,101106207,101103071,114112825,101108006,101108076,101116646,443155,114109364,114112842,101118334,114118686,101110893,101121484,100359412,114115360,114112829,114112824,101112734
GO:0016820	hydrolase activity, acting on acid anhydrides, catalyzing transmembrane movement of substances	molecular_function	0.34426	1	10	1056	155	19038	1.01118e+89
GO:0006006	glucose metabolic process	biological_process	0.3443	1	4	1056	54	19038	1.00216e+32
GO:0009725	response to hormone stimulus	biological_process	0.34613	1	6	1056	88	19038	1.0112e+53
GO:0006612	protein targeting to membrane	biological_process	0.3466	1	4	1056	54	19038	1.01109e+35
GO:0005578	proteinaceous extracellular matrix	cellular_component	0.34717	1	10	1056	155	19038	1.01115e+89
GO:0015672	monovalent inorganic cation transport	biological_process	0.34879	1	26	1056	434	19038	101118367,101113095,101103792,101123332,101121071,101111508,101106745,101102032,101119372,101115005,101113595,101113744,101115095,101120875,100302624,101107980,101113504,101121174,101108165,101123578,101123528,101119460,101117892,100359412,101108027,101118054
GO:0071103	DNA conformation change	biological_process	0.34927	1	9	1056	137	19038	1.01102e+80
GO:0015267	channel activity	molecular_function	0.35262	1	29	1056	489	19038	101115095,101113744,100302624,101107980,101117078,101121174,101108165,101110536,101118499,101110976,101123528,101118819,101117892,101108864,114118046,101111082,101120348,101105466,101121071,101112012,101111508,101104978,101110267,101120989,101119372,101102032,101113595,114116113,101104643
GO:0022803	passive transmembrane transporter activity	molecular_function	0.35262	1	29	1056	489	19038	101110976,101123528,101118819,101117892,101108864,114118046,101113744,101115095,100302624,101107980,101117078,101121174,101108165,101110536,101118499,101121071,101112012,101111508,101104978,101110267,101120989,101102032,101119372,114116113,101113595,101104643,101111082,101120348,101105466
GO:0015276	ligand-gated ion channel activity	molecular_function	0.35302	1	10	1056	156	19038	1.01115e+89
GO:0022834	ligand-gated channel activity	molecular_function	0.35302	1	10	1056	156	19038	1.01111e+89
GO:0016151	nickel cation binding	molecular_function	0.35539	1	11	1056	171	19038	1.01103e+98
GO:0016485	protein processing	biological_process	0.35546	1	5	1056	71	19038	1.01111e+44
GO:0051604	protein maturation	biological_process	0.35546	1	5	1056	71	19038	1.01118e+44
GO:0016108	tetraterpenoid metabolic process	biological_process	0.35701	1	2	1056	23	19038	1.01118e+17
GO:0016109	tetraterpenoid biosynthetic process	biological_process	0.35701	1	2	1056	23	19038	1.01118e+17
GO:0016116	carotenoid metabolic process	biological_process	0.35701	1	2	1056	23	19038	1.01118e+17
GO:0016117	carotenoid biosynthetic process	biological_process	0.35701	1	2	1056	23	19038	1.01118e+17
GO:0004668	protein-arginine deiminase activity	molecular_function	0.35751	1	1	1056	8	19038	101112525
GO:0003830	beta-1,4-mannosylglycoprotein 4-beta-N-acetylglucosaminyltransferase activity	molecular_function	0.35813	1	1	1056	8	19038	114118046
GO:0016458	gene silencing	biological_process	0.35818	1	1	1056	8	19038	101110621
GO:0004715	non-membrane spanning protein tyrosine kinase activity	molecular_function	0.35823	1	1	1056	8	19038	101110351
GO:0033227	dsRNA transport	biological_process	0.35826	1	1	1056	8	19038	101111901
GO:0051032	nucleic acid transmembrane transporter activity	molecular_function	0.35826	1	1	1056	8	19038	101111901
GO:0051033	RNA transmembrane transporter activity	molecular_function	0.35826	1	1	1056	8	19038	101111901
GO:0016709	oxidoreductase activity, acting on paired donors, with incorporation or reduction of molecular oxygen, NAD(P)H as one donor, and incorporation of one atom of oxygen	molecular_function	0.35839	1	2	1056	23	19038	443078443533
GO:0009295	nucleoid	cellular_component	0.35865	1	1	1056	8	19038	101104887
GO:0009916	alternative oxidase activity	molecular_function	0.35902	1	1	1056	8	19038	101117602
GO:0031175	neuron projection development	biological_process	0.35914	1	3	1056	39	19038	1.01114e+26
GO:0048666	neuron development	biological_process	0.35914	1	3	1056	39	19038	1.01114e+26
GO:0004797	thymidine kinase activity	molecular_function	0.36004	1	1	1056	8	19038	101119865
GO:0019136	deoxynucleoside kinase activity	molecular_function	0.36004	1	1	1056	8	19038	101119865
GO:0019206	nucleoside kinase activity	molecular_function	0.36004	1	1	1056	8	19038	101119865
GO:0006582	melanin metabolic process	biological_process	0.36013	1	1	1056	8	19038	101107672
GO:0008192	RNA guanylyltransferase activity	molecular_function	0.36049	1	1	1056	8	19038	101116202
GO:0070568	guanylyltransferase activity	molecular_function	0.36049	1	1	1056	8	19038	101116202
GO:0031369	translation initiation factor binding	molecular_function	0.36072	1	1	1056	8	19038	101112694
GO:0019013	viral nucleocapsid	cellular_component	0.36075	1	3	1056	39	19038	1.01121e+26
GO:0016614	oxidoreductase activity, acting on CH-OH group of donors	molecular_function	0.36111	1	10	1056	158	19038	1.01115e+89
GO:0006302	double-strand break repair	biological_process	0.36165	1	3	1056	39	19038	1.01117e+26
GO:0006536	glutamate metabolic process	biological_process	0.36227	1	1	1056	8	19038	101104144
GO:0008982	protein-N(PI)-phosphohistidine-sugar phosphotransferase activity	molecular_function	0.36258	1	1	1056	8	19038	101110976
GO:0001614	purinergic nucleotide receptor activity	molecular_function	0.3633	1	1	1056	8	19038	101118819
GO:0004931	extracellular ATP-gated cation channel activity	molecular_function	0.3633	1	1	1056	8	19038	101118819
GO:0014074	response to purine-containing compound	biological_process	0.3633	1	1	1056	8	19038	101118819
GO:0016502	nucleotide receptor activity	molecular_function	0.3633	1	1	1056	8	19038	101118819
GO:0033198	response to ATP	biological_process	0.3633	1	1	1056	8	19038	101118819
GO:0035381	ATP-gated ion channel activity	molecular_function	0.3633	1	1	1056	8	19038	101118819
GO:0035586	purinergic receptor activity	molecular_function	0.3633	1	1	1056	8	19038	101118819
GO:0046683	response to organophosphorus	biological_process	0.3633	1	1	1056	8	19038	101118819
GO:0017025	TBP-class protein binding	molecular_function	0.36361	1	1	1056	8	19038	101106207
GO:0006012	galactose metabolic process	biological_process	0.36395	1	1	1056	8	19038	105603785
GO:0004635	phosphoribosyl-AMP cyclohydrolase activity	molecular_function	0.36407	1	1	1056	8	19038	101109224
GO:0019855	calcium channel inhibitor activity	molecular_function	0.36409	1	2	1056	23	19038	1.01112e+17
GO:0016491	oxidoreductase activity	molecular_function	0.36416	1	80	1056	1397	19038	101122521,100170111,443078,101111396,114118047,101115797,105604882,101115278,105613287,101120042,106990140,101114097,101119865,101117221,101118148,101117509,101104266,101107641,101103257,101120054,101113346,101123649,105601907,101117892,101111046,121817553,101108864,101118398,101110351,101104908,114108597,101113685,101115974,101115005,114110594,101112384,101119041,101121738,101118054,101122988,10…
GO:0042126	nitrate metabolic process	biological_process	0.36418	1	1	1056	8	19038	101118054
GO:0042128	nitrate assimilation	biological_process	0.36418	1	1	1056	8	19038	101118054
GO:2001057	reactive nitrogen species metabolic process	biological_process	0.36418	1	1	1056	8	19038	101118054
GO:0007608	sensory perception of smell	biological_process	0.36421	1	1	1056	8	19038	101122570
GO:0019203	carbohydrate phosphatase activity	molecular_function	0.36447	1	1	1056	8	19038	101106243
GO:0050308	sugar-phosphatase activity	molecular_function	0.36447	1	1	1056	8	19038	101106243
GO:0016903	oxidoreductase activity, acting on the aldehyde or oxo group of donors	molecular_function	0.36481	1	3	1056	39	19038	1.01113e+26
GO:0006771	riboflavin metabolic process	biological_process	0.36605	1	1	1056	8	19038	101115974
GO:0009231	riboflavin biosynthetic process	biological_process	0.36605	1	1	1056	8	19038	101115974
GO:0042726	flavin-containing compound metabolic process	biological_process	0.36605	1	1	1056	8	19038	101115974
GO:0042727	flavin-containing compound biosynthetic process	biological_process	0.36605	1	1	1056	8	19038	101115974
GO:0044421	extracellular region part	cellular_component	0.36668	1	31	1056	524	19038	494440,101116580,101120348,114117771,114112680,101106322,101111268,114108725,114118872,114116113,101120979,101105541,101106490,101102644,101112070,101117600,101102085,101106681,101105527,100196905,114109630,101112321,101117020,101111450,114118046,101114786,101118159,121817953,105601985,101111396,101106373
GO:0004527	exonuclease activity	molecular_function	0.36703	1	10	1056	158	19038	1.01115e+89
GO:0046649	lymphocyte activation	biological_process	0.36786	1	1	1056	8	19038	101110725
GO:0044766	multi-organism transport	biological_process	0.3682	1	1	1056	8	19038	101116769
GO:0030479	actin cortical patch	cellular_component	0.36865	1	1	1056	8	19038	101110976
GO:0030863	cortical cytoskeleton	cellular_component	0.36865	1	1	1056	8	19038	101110976
GO:0030864	cortical actin cytoskeleton	cellular_component	0.36865	1	1	1056	8	19038	101110976
GO:0016810	hydrolase activity, acting on carbon-nitrogen (but not peptide) bonds	molecular_function	0.36884	1	6	1056	90	19038	1.01109e+53
GO:1901362	organic cyclic compound biosynthetic process	biological_process	0.37087	1	162	1056	2863	19038	101115005,101115974,101116988,101109811,101123332,101112041,XLOC_091011,494440,101123079,101119938,101107593,101111046,105601907,121819509,114112829,114112844,121817953,101120286,101108241,101104783,101119818,101112872,101115254,101121955,101117906,101118128,114113008,101118426,101113998,101122496,114117799,101108604,101115797,101117336,101122255,100169939,101120682,101123658,101111683,101104144,…
GO:0016469	proton-transporting two-sector ATPase complex	cellular_component	0.37184	1	11	1056	175	19038	1.01123e+98
GO:0015934	large ribosomal subunit	cellular_component	0.37431	1	1	1056	8	19038	101115275
GO:0042158	lipoprotein biosynthetic process	biological_process	0.37746	1	3	1056	40	19038	1.01116e+26
GO:0005262	calcium channel activity	molecular_function	0.37775	1	4	1056	56	19038	1.01105e+35
GO:0008202	steroid metabolic process	biological_process	0.37778	1	3	1056	40	19038	1.01109e+26
GO:0004857	enzyme inhibitor activity	molecular_function	0.3794	1	17	1056	279	19038	1.14115e+152
GO:0003854	3-beta-hydroxy-delta5-steroid dehydrogenase activity	molecular_function	0.38126	1	2	1056	24	19038	1.01115e+17
GO:0016229	steroid dehydrogenase activity	molecular_function	0.38126	1	2	1056	24	19038	1.0112e+17
GO:0033764	steroid dehydrogenase activity, acting on the CH-OH group of donors, NAD or NADP as acceptor	molecular_function	0.38126	1	2	1056	24	19038	1.0112e+17
GO:0016818	hydrolase activity, acting on acid anhydrides, in phosphorus-containing anhydrides	molecular_function	0.38306	1	54	1056	939	19038	101119116,101102343,100302103,101105151,101118367,101102259,101111268,101119938,101104051,101120032,101101915,101115005,101116317,780452,101120116,101106047,114114866,101108399,101120796,101108241,101111066,101106317,101120875,114115360,101104461,101123321,101121697,101109364,101111322,101106209,105608906,101104887,101108295,100302084,101122496,101115534,101115254,101114648,101123507,100302303,10…
GO:0016010	dystrophin-associated glycoprotein complex	cellular_component	0.3834	1	2	1056	24	19038	1.01115e+17
GO:0070838	divalent metal ion transport	biological_process	0.38411	1	8	1056	125	19038	1.01106e+71
GO:1901605	alpha-amino acid metabolic process	biological_process	0.38561	1	9	1056	143	19038	1.01115e+80
GO:0004252	serine-type endopeptidase activity	molecular_function	0.38614	1	16	1056	263	19038	1.14115e+143
GO:0016616	oxidoreductase activity, acting on the CH-OH group of donors, NAD or NADP as acceptor	molecular_function	0.38739	1	9	1056	144	19038	1.01108e+80
GO:0033643	host cell part	cellular_component	0.38744	1	10	1056	161	19038	1.0112e+86
GO:0009267	cellular response to starvation	biological_process	0.38782	1	2	1056	24	19038	1.1411e+17
GO:0031667	response to nutrient levels	biological_process	0.38782	1	2	1056	24	19038	1.1411e+17
GO:0031669	cellular response to nutrient levels	biological_process	0.38782	1	2	1056	24	19038	1.1411e+17
GO:0042594	response to starvation	biological_process	0.38782	1	2	1056	24	19038	1.1411e+17
GO:0033646	host intracellular part	cellular_component	0.38824	1	8	1056	126	19038	1.01111e+68
GO:0043656	intracellular region of host	cellular_component	0.38824	1	8	1056	126	19038	4.9444e+68
GO:0007264	small GTPase mediated signal transduction	biological_process	0.38941	1	23	1056	390	19038	1.0111e+206
GO:0044271	cellular nitrogen compound biosynthetic process	biological_process	0.39086	1	159	1056	2820	19038	101115946,101121188,101110936,114114866,101121093,101108399,100527962,101114518,101123244,100171394,114115360,100359412,101113034,101123336,101104908,114113264,121816444,101103071,101120428,101114859,101117358,114112842,101102047,101102976,114108616,101105652,101114648,101119865,101118148,101118218,101110699,114112826,101107348,105610305,101119014,443078,101105239,101110976,101114267,114118047,10…
GO:0052652	cyclic purine nucleotide metabolic process	biological_process	0.39214	1	2	1056	25	19038	1.01112e+17
GO:0032879	regulation of localization	biological_process	0.39249	1	6	1056	92	19038	101104395,101102366,114110560,101114773,XLOC_125215,105608906
GO:0009620	response to fungus	biological_process	0.39267	1	1	1056	9	19038	101109364
GO:0050832	defense response to fungus	biological_process	0.39267	1	1	1056	9	19038	101109364
GO:0005247	voltage-gated chloride channel activity	molecular_function	0.39269	1	1	1056	9	19038	101111082
GO:0005254	chloride channel activity	molecular_function	0.39269	1	1	1056	9	19038	101111082
GO:0008308	voltage-gated anion channel activity	molecular_function	0.39269	1	1	1056	9	19038	101111082
GO:0015108	chloride transmembrane transporter activity	molecular_function	0.39269	1	1	1056	9	19038	101111082
GO:0044448	cell cortex part	cellular_component	0.39274	1	6	1056	92	19038	1.14115e+53
GO:0009260	ribonucleotide biosynthetic process	biological_process	0.39349	1	9	1056	144	19038	1.00302e+80
GO:0046390	ribose phosphate biosynthetic process	biological_process	0.39349	1	9	1056	144	19038	1.0112e+80
GO:0016307	phosphatidylinositol phosphate kinase activity	molecular_function	0.39353	1	1	1056	9	19038	101107157
GO:0019207	kinase regulator activity	molecular_function	0.39368	1	4	1056	57	19038	1.01103e+35
GO:0017111	nucleoside-triphosphatase activity	molecular_function	0.39389	1	50	1056	871	19038	101107720,101113020,101105791,101123507,100302303,101118307,101115534,101115254,101114648,101122496,100302084,101108295,101104887,101114267,101101877,101106373,101107395,101120534,101113744,101111069,100145877,101121740,114114866,101106047,101108399,101120116,780452,101116317,101101915,101115005,101104051,101120032,101118367,101105151,101102259,101111268,100302103,101102343,101119116,101106209,10…
GO:0006493	protein O-linked glycosylation	biological_process	0.3942	1	1	1056	9	19038	101104887
GO:0005326	neurotransmitter transporter activity	molecular_function	0.39424	1	2	1056	25	19038	1.01121e+17
GO:0005328	neurotransmitter:sodium symporter activity	molecular_function	0.39424	1	2	1056	25	19038	1.01121e+17
GO:0016814	hydrolase activity, acting on carbon-nitrogen (but not peptide) bonds, in cyclic amidines	molecular_function	0.39448	1	3	1056	41	19038	1.01109e+26
GO:0005581	collagen	cellular_component	0.39453	1	2	1056	25	19038	1.00197e+17
GO:0001772	immunological synapse	cellular_component	0.39489	1	1	1056	9	19038	101116646
GO:0097197	tetraspanin-enriched microdomain	cellular_component	0.39489	1	1	1056	9	19038	101116646
GO:0007052	mitotic spindle organization	biological_process	0.39541	1	1	1056	9	19038	101110893
GO:0000213	tRNA-intron endonuclease activity	molecular_function	0.39561	1	1	1056	9	19038	101107041
GO:0016286	small conductance calcium-activated potassium channel activity	molecular_function	0.39588	1	1	1056	9	19038	101119372
GO:0004784	superoxide dismutase activity	molecular_function	0.39617	1	1	1056	9	19038	101103311
GO:0016721	oxidoreductase activity, acting on superoxide radicals as acceptor	molecular_function	0.39617	1	1	1056	9	19038	101103311
GO:0019400	alditol metabolic process	biological_process	0.39699	1	1	1056	9	19038	101122194
GO:0004806	triglyceride lipase activity	molecular_function	0.39726	1	1	1056	9	19038	101105505
GO:0001765	membrane raft assembly	biological_process	0.39727	1	1	1056	9	19038	105603087
GO:0031579	membrane raft organization	biological_process	0.39727	1	1	1056	9	19038	105603087
GO:0070836	caveola assembly	biological_process	0.39727	1	1	1056	9	19038	105603087
GO:0070603	SWI/SNF superfamily-type complex	cellular_component	0.39771	1	1	1056	9	19038	101115263
GO:0005746	mitochondrial respiratory chain	cellular_component	0.39791	1	3	1056	41	19038	1.01116e+26
GO:0019239	deaminase activity	molecular_function	0.39805	1	2	1056	25	19038	1.01102e+17
GO:0044212	transcription regulatory region DNA binding	molecular_function	0.39844	1	1	1056	9	19038	101107196
GO:0017176	phosphatidylinositol N-acetylglucosaminyltransferase activity	molecular_function	0.39885	1	1	1056	9	19038	101114362
GO:0018130	heterocycle biosynthetic process	biological_process	0.39895	1	159	1056	2824	19038	101116889,101114511,101114012,114113147,101103140,101109765,105603087,101121321,101104979,101108529,114111703,105606599,101110078,443469,101104912,101119036,114112825,114109630,101112344,101121441,101112975,101121510,101117613,101111979,101111927,101103311,100302103,101115026,101110423,114113207,101120348,101103105,114110261,101117020,101107196,101105321,101116528,101117043,101109224,101121174,10…
GO:0005540	hyaluronic acid binding	molecular_function	0.39964	1	2	1056	25	19038	443001101102761
GO:0015930	glutamate synthase activity	molecular_function	0.39974	1	1	1056	9	19038	101104144
GO:0017150	tRNA dihydrouridine synthase activity	molecular_function	0.40038	1	1	1056	9	19038	101104144
GO:0007217	tachykinin receptor signaling pathway	biological_process	0.40051	1	1	1056	9	19038	121819705
GO:0004521	endoribonuclease activity	molecular_function	0.40099	1	5	1056	75	19038	101117078,XLOC_069361,101107041,101115827,114116607
GO:0006357	regulation of transcription from RNA polymerase II promoter	biological_process	0.40251	1	11	1056	180	19038	1.01122e+95
GO:0018143	nucleic acid-protein covalent cross-linking	biological_process	0.40268	1	1	1056	9	19038	101123336
GO:0044463	cell projection part	cellular_component	0.40436	1	2	1056	25	19038	101102047780452
GO:0031012	extracellular matrix	cellular_component	0.40479	1	14	1056	233	19038	1.01104e+125
GO:0016192	vesicle-mediated transport	biological_process	0.40552	1	22	1056	376	19038	1.01112e+197
GO:0046933	proton-transporting ATP synthase activity, rotational mechanism	molecular_function	0.40574	1	1	1056	9	19038	101115005
GO:0031123	RNA 3'-end processing	biological_process	0.40594	1	2	1056	25	19038	1.01122e+17
GO:0005083	small GTPase regulator activity	molecular_function	0.40788	1	6	1056	95	19038	1.0111e+53
GO:0048037	cofactor binding	molecular_function	0.40961	1	22	1056	377	19038	1.01111e+191
GO:0005730	nucleolus	cellular_component	0.40983	1	2	1056	25	19038	1.14117e+17
GO:0006754	ATP biosynthetic process	biological_process	0.41051	1	5	1056	76	19038	1.01115e+44
GO:0031300	intrinsic to organelle membrane	cellular_component	0.41946	1	5	1056	77	19038	1.01122e+44
GO:0031301	integral to organelle membrane	cellular_component	0.41946	1	5	1056	77	19038	1.01122e+44
GO:0010627	regulation of intracellular protein kinase cascade	biological_process	0.42037	1	2	1056	26	19038	1.1411e+17
GO:0009144	purine nucleoside triphosphate metabolic process	biological_process	0.42077	1	7	1056	112	19038	1.00302e+62
GO:0009199	ribonucleoside triphosphate metabolic process	biological_process	0.42077	1	7	1056	112	19038	1.01115e+62
GO:0009205	purine ribonucleoside triphosphate metabolic process	biological_process	0.42077	1	7	1056	112	19038	1.01121e+62
GO:0030182	neuron differentiation	biological_process	0.42146	1	3	1056	43	19038	1.01103e+26
GO:0048699	generation of neurons	biological_process	0.42146	1	3	1056	43	19038	1.01114e+26
GO:0031082	BLOC complex	cellular_component	0.42184	1	2	1056	26	19038	1.0111e+17
GO:0031083	BLOC-1 complex	cellular_component	0.42184	1	2	1056	26	19038	1.0111e+17
GO:0004064	arylesterase activity	molecular_function	0.42353	1	1	1056	10	19038	101123514
GO:0048878	chemical homeostasis	biological_process	0.42388	1	6	1056	93	19038	1.01115e+53
GO:0004003	ATP-dependent DNA helicase activity	molecular_function	0.42439	1	2	1056	26	19038	1.01102e+17
GO:0019080	viral genome expression	biological_process	0.42543	1	3	1056	43	19038	1.01105e+26
GO:0005253	anion channel activity	molecular_function	0.42573	1	1	1056	10	19038	101111082
GO:0045766	positive regulation of angiogenesis	biological_process	0.42593	1	1	1056	10	19038	101114341
GO:0034599	cellular response to oxidative stress	biological_process	0.42858	1	1	1056	10	19038	101110976
GO:0015996	chlorophyll catabolic process	biological_process	0.42941	1	1	1056	10	19038	101115927
GO:0047746	chlorophyllase activity	molecular_function	0.42941	1	1	1056	10	19038	101115927
GO:0016884	carbon-nitrogen ligase activity, with glutamine as amido-N-donor	molecular_function	0.43037	1	1	1056	10	19038	101104979
GO:0004540	ribonuclease activity	molecular_function	0.4309	1	7	1056	113	19038	101117078,101119719,101107041,101115827,114116607,101117900,XLOC_069361
GO:0042440	pigment metabolic process	biological_process	0.431	1	5	1056	79	19038	1.01116e+44
GO:0010243	response to organonitrogen compound	biological_process	0.43198	1	1	1056	10	19038	101118819
GO:0005779	integral to peroxisomal membrane	cellular_component	0.43231	1	1	1056	10	19038	101116330
GO:0031231	intrinsic to peroxisomal membrane	cellular_component	0.43231	1	1	1056	10	19038	101116330
GO:0016462	pyrophosphatase activity	molecular_function	0.43284	1	50	1056	883	19038	100302084,101122496,101104887,101108295,100302303,101123507,101118307,101105791,101113020,101107720,101115534,101114648,101115254,101111069,101113744,101121740,100145877,101101877,101106373,101114267,101120534,101107395,101111268,101102259,101105151,101118367,101120032,101104051,101119116,100302103,101102343,101120116,101108399,101106047,114114866,101115005,101101915,101116317,780452,101106317,10…
GO:0006336	DNA replication-independent nucleosome assembly	biological_process	0.43284	1	1	1056	10	19038	114112844
GO:0031055	chromatin remodeling at centromere	biological_process	0.43284	1	1	1056	10	19038	114112844
GO:0034080	CENP-A containing nucleosome assembly at centromere	biological_process	0.43284	1	1	1056	10	19038	114112844
GO:0034724	DNA replication-independent nucleosome organization	biological_process	0.43284	1	1	1056	10	19038	114112844
GO:0043486	histone exchange	biological_process	0.43284	1	1	1056	10	19038	114112844
GO:0045321	leukocyte activation	biological_process	0.43372	1	1	1056	10	19038	101110725
GO:0005861	troponin complex	cellular_component	0.43443	1	1	1056	10	19038	101104467
GO:0005865	striated muscle thin filament	cellular_component	0.43443	1	1	1056	10	19038	101104467
GO:0030016	myofibril	cellular_component	0.43443	1	1	1056	10	19038	101104467
GO:0030017	sarcomere	cellular_component	0.43443	1	1	1056	10	19038	101104467
GO:0036379	myofilament	cellular_component	0.43443	1	1	1056	10	19038	101104467
GO:0043292	contractile fiber	cellular_component	0.43443	1	1	1056	10	19038	101104467
GO:0044449	contractile fiber part	cellular_component	0.43443	1	1	1056	10	19038	101104467
GO:0017089	glycolipid transporter activity	molecular_function	0.43457	1	1	1056	10	19038	101115095
GO:0046836	glycolipid transport	biological_process	0.43457	1	1	1056	10	19038	101115095
GO:0033176	proton-transporting V-type ATPase complex	cellular_component	0.43477	1	5	1056	79	19038	1.01114e+44
GO:0044433	cytoplasmic vesicle part	cellular_component	0.43552	1	5	1056	79	19038	1.01121e+44
GO:0034637	cellular carbohydrate biosynthetic process	biological_process	0.43647	1	2	1056	27	19038	1.01104e+17
GO:0003857	3-hydroxyacyl-CoA dehydrogenase activity	molecular_function	0.43661	1	2	1056	27	19038	1.05606e+17
GO:0022008	neurogenesis	biological_process	0.43665	1	3	1056	44	19038	1.01103e+26
GO:2000026	regulation of multicellular organismal development	biological_process	0.4369	1	3	1056	44	19038	1.0112e+26
GO:0033202	DNA helicase complex	cellular_component	0.43706	1	1	1056	10	19038	101115254
GO:0050852	T cell receptor signaling pathway	biological_process	0.43759	1	1	1056	10	19038	101102917
GO:0070070	proton-transporting V-type ATPase complex assembly	biological_process	0.43913	1	1	1056	10	19038	101111964
GO:0070072	vacuolar proton-transporting V-type ATPase complex assembly	biological_process	0.43913	1	1	1056	10	19038	101111964
GO:0051726	regulation of cell cycle	biological_process	0.44035	1	8	1056	130	19038	1.01113e+68
GO:0008026	ATP-dependent helicase activity	molecular_function	0.44078	1	3	1056	44	19038	1.01102e+26
GO:0070035	purine NTP-dependent helicase activity	molecular_function	0.44078	1	3	1056	44	19038	1.01119e+26
GO:0009150	purine ribonucleotide metabolic process	biological_process	0.44134	1	10	1056	168	19038	1.01119e+89
GO:0009790	embryo development	biological_process	0.44264	1	2	1056	27	19038	1.05609e+17
GO:0006869	lipid transport	biological_process	0.44279	1	6	1056	97	19038	1.01105e+53
GO:0022900	electron transport chain	biological_process	0.44307	1	7	1056	115	19038	1.01109e+62
GO:0050840	extracellular matrix binding	molecular_function	0.44328	1	2	1056	27	19038	1.01122e+17
GO:0005672	transcription factor TFIIA complex	cellular_component	0.44329	1	2	1056	27	19038	1.01119e+17
GO:0006366	transcription from RNA polymerase II promoter	biological_process	0.44342	1	16	1056	275	19038	1.01115e+140
GO:0019637	organophosphate metabolic process	biological_process	0.44489	1	25	1056	437	19038	100302103,101117633,101103983,101113438,101118367,101106160,114116607,101115005,101105735,101123332,101119865,XLOC_069361,101107157,101120875,101114859,101111683,101114703,101122097,101104979,121819509,101119420,101117043,105616742,101108687,101119460
GO:0006413	translational initiation	biological_process	0.44645	1	3	1056	44	19038	1.01124e+26
GO:0006631	fatty acid metabolic process	biological_process	0.448	1	5	1056	80	19038	1.01122e+44
GO:0019887	protein kinase regulator activity	molecular_function	0.44951	1	3	1056	44	19038	1.01103e+26
GO:0009165	nucleotide biosynthetic process	biological_process	0.45135	1	11	1056	187	19038	1.01118e+98
GO:1901293	nucleoside phosphate biosynthetic process	biological_process	0.45135	1	11	1056	187	19038	1.00302e+98
GO:0016891	endoribonuclease activity, producing 5'-phosphomonoesters	molecular_function	0.45215	1	4	1056	62	19038	101117078,114116607,101115827,XLOC_069361
GO:0044420	extracellular matrix part	cellular_component	0.45286	1	2	1056	28	19038	1.01106e+17
GO:0005231	excitatory extracellular ligand-gated ion channel activity	molecular_function	0.45364	1	2	1056	28	19038	1.01119e+17
GO:0006275	regulation of DNA replication	biological_process	0.45424	1	3	1056	45	19038	4.43155e+23
GO:0005996	monosaccharide metabolic process	biological_process	0.45523	1	7	1056	116	19038	1.05604e+56
GO:0016813	hydrolase activity, acting on carbon-nitrogen (but not peptide) bonds, in linear amidines	molecular_function	0.45556	1	1	1056	11	19038	101112525
GO:0007020	microtubule nucleation	biological_process	0.45566	1	1	1056	11	19038	101118866
GO:0010968	regulation of microtubule nucleation	biological_process	0.45566	1	1	1056	11	19038	101118866
GO:0090063	positive regulation of microtubule nucleation	biological_process	0.45566	1	1	1056	11	19038	101118866
GO:0070469	respiratory chain	cellular_component	0.45716	1	3	1056	45	19038	1.01116e+26
GO:0009108	coenzyme biosynthetic process	biological_process	0.45722	1	5	1056	81	19038	1.01105e+44
GO:0030126	COPI vesicle coat	cellular_component	0.45733	1	1	1056	11	19038	101118583
GO:0030137	COPI-coated vesicle	cellular_component	0.45733	1	1	1056	11	19038	101118583
GO:0030663	COPI-coated vesicle membrane	cellular_component	0.45733	1	1	1056	11	19038	101118583
GO:0030246	carbohydrate binding	molecular_function	0.4579	1	6	1056	98	19038	1.01118e+50
GO:0042546	cell wall biogenesis	biological_process	0.45813	1	1	1056	11	19038	101110286
GO:0015698	inorganic anion transport	biological_process	0.45825	1	4	1056	63	19038	1.0112e+35
GO:0006777	Mo-molybdopterin cofactor biosynthetic process	biological_process	0.45896	1	1	1056	11	19038	101119420
GO:0019720	Mo-molybdopterin cofactor metabolic process	biological_process	0.45896	1	1	1056	11	19038	101119420
GO:0090407	organophosphate biosynthetic process	biological_process	0.4593	1	16	1056	278	19038	1.01112e+143
GO:0004565	beta-galactosidase activity	molecular_function	0.45965	1	1	1056	11	19038	105603785
GO:0005125	cytokine activity	molecular_function	0.46003	1	5	1056	78	19038	1.01104e+41
GO:0051273	beta-glucan metabolic process	biological_process	0.46172	1	1	1056	11	19038	101113336
GO:0009069	serine family amino acid metabolic process	biological_process	0.46193	1	1	1056	11	19038	101117043
GO:0007157	heterophilic cell-cell adhesion	biological_process	0.46206	1	1	1056	11	19038	101105151
GO:0000186	activation of MAPKK activity	biological_process	0.46222	1	1	1056	11	19038	114109630
GO:0001678	cellular glucose homeostasis	biological_process	0.46222	1	1	1056	11	19038	114109630
GO:0008343	adult feeding behavior	biological_process	0.46222	1	1	1056	11	19038	114109630
GO:0030534	adult behavior	biological_process	0.46222	1	1	1056	11	19038	114109630
GO:0032094	response to food	biological_process	0.46222	1	1	1056	11	19038	114109630
GO:0032095	regulation of response to food	biological_process	0.46222	1	1	1056	11	19038	114109630
GO:0032096	negative regulation of response to food	biological_process	0.46222	1	1	1056	11	19038	114109630
GO:0032098	regulation of appetite	biological_process	0.46222	1	1	1056	11	19038	114109630
GO:0032099	negative regulation of appetite	biological_process	0.46222	1	1	1056	11	19038	114109630
GO:0032102	negative regulation of response to external stimulus	biological_process	0.46222	1	1	1056	11	19038	114109630
GO:0032104	regulation of response to extracellular stimulus	biological_process	0.46222	1	1	1056	11	19038	114109630
GO:0032105	negative regulation of response to extracellular stimulus	biological_process	0.46222	1	1	1056	11	19038	114109630
GO:0032107	regulation of response to nutrient levels	biological_process	0.46222	1	1	1056	11	19038	114109630
GO:0032108	negative regulation of response to nutrient levels	biological_process	0.46222	1	1	1056	11	19038	114109630
GO:0032147	activation of protein kinase activity	biological_process	0.46222	1	1	1056	11	19038	114109630
GO:0033500	carbohydrate homeostasis	biological_process	0.46222	1	1	1056	11	19038	114109630
GO:0033674	positive regulation of kinase activity	biological_process	0.46222	1	1	1056	11	19038	114109630
GO:0042593	glucose homeostasis	biological_process	0.46222	1	1	1056	11	19038	114109630
GO:0045860	positive regulation of protein kinase activity	biological_process	0.46222	1	1	1056	11	19038	114109630
GO:0051347	positive regulation of transferase activity	biological_process	0.46222	1	1	1056	11	19038	114109630
GO:0006900	membrane budding	biological_process	0.46226	1	1	1056	11	19038	114111619
GO:0006901	vesicle coating	biological_process	0.46226	1	1	1056	11	19038	114111619
GO:0007212	dopamine receptor signaling pathway	biological_process	0.46226	1	1	1056	11	19038	114111619
GO:0030276	clathrin binding	molecular_function	0.46226	1	1	1056	11	19038	114111619
GO:0032051	clathrin light chain binding	molecular_function	0.46226	1	1	1056	11	19038	114111619
GO:0048268	clathrin coat assembly	biological_process	0.46226	1	1	1056	11	19038	114111619
GO:0042287	MHC protein binding	molecular_function	0.46247	1	1	1056	11	19038	101102047
GO:0042289	MHC class II protein binding	molecular_function	0.46247	1	1	1056	11	19038	101102047
GO:0000439	core TFIIH complex	cellular_component	0.4625	1	1	1056	11	19038	101102343
GO:0000441	SSL2-core TFIIH complex	cellular_component	0.4625	1	1	1056	11	19038	101102343
GO:0032806	carboxy-terminal domain protein kinase complex	cellular_component	0.4625	1	1	1056	11	19038	101102343
GO:0008289	lipid binding	molecular_function	0.46295	1	16	1056	280	19038	1.01106e+143
GO:0008378	galactosyltransferase activity	molecular_function	0.46303	1	2	1056	28	19038	1.05609e+17
GO:0008443	phosphofructokinase activity	molecular_function	0.46304	1	2	1056	28	19038	443489100302303
GO:1901566	organonitrogen compound biosynthetic process	biological_process	0.46447	1	27	1056	478	19038	101123332,101119865,101104144,101109811,101115005,101115974,101105735,101118367,101113998,100302103,101115127,101113906,101107196,101107623,101110976,101119420,101117043,101116528,101109364,101115797,101104979,101120875,101113871,101114859,101111683,101104908,101109224
GO:0050790	regulation of catalytic activity	biological_process	0.46459	1	8	1056	135	19038	1.01103e+71
GO:0005549	odorant binding	molecular_function	0.46532	1	1	1056	11	19038	101122570
GO:0006284	base-excision repair	biological_process	0.46611	1	1	1056	11	19038	101119344
GO:0000272	polysaccharide catabolic process	biological_process	0.46722	1	1	1056	11	19038	101113336
GO:0006732	coenzyme metabolic process	biological_process	0.46898	1	6	1056	100	19038	1.01107e+53
GO:0070071	proton-transporting two-sector ATPase complex assembly	biological_process	0.47023	1	1	1056	11	19038	101111964
GO:0004674	protein serine/threonine kinase activity	molecular_function	0.47358	1	12	1056	209	19038	1.01116e+107
GO:0034061	DNA polymerase activity	molecular_function	0.47368	1	7	1056	118	19038	114116607,101112645,XLOC_069361,105616742,101104783,101108399,101110976
GO:0051537	2 iron, 2 sulfur cluster binding	molecular_function	0.47463	1	3	1056	47	19038	1.01118e+26
GO:0005777	peroxisome	cellular_component	0.47484	1	2	1056	29	19038	1.01108e+17
GO:0042579	microbody	cellular_component	0.47484	1	2	1056	29	19038	1.01108e+17
GO:0004602	glutathione peroxidase activity	molecular_function	0.47633	1	1	1056	11	19038	101121229
GO:0044264	cellular polysaccharide metabolic process	biological_process	0.47669	1	2	1056	29	19038	1.01113e+17
GO:0004523	ribonuclease H activity	molecular_function	0.47766	1	3	1056	46	19038	XLOC_069361,114116607,101117078
GO:0030234	enzyme regulator activity	molecular_function	0.47774	1	34	1056	606	19038	101104720,101120630,101109765,101113838,114110560,101111593,101107078,101103339,101110078,101105904,101110499,101104846,101111683,101101892,443325,105605978,101118819,101121729,114117771,101108765,101111268,101102133,101105216,101103720,101102884,101104783,101101993,101117020,101121484,101122183,101120830,114115360,101115374,101121257
GO:0007399	nervous system development	biological_process	0.47939	1	3	1056	47	19038	1.01114e+26
GO:0009119	ribonucleoside metabolic process	biological_process	0.48007	1	9	1056	155	19038	1.01119e+80
GO:0051052	regulation of DNA metabolic process	biological_process	0.48239	1	3	1056	47	19038	1.21818e+23
GO:0019318	hexose metabolic process	biological_process	0.48244	1	6	1056	101	19038	1.00302e+50
GO:0032065	cortical protein anchoring	biological_process	0.48366	1	1	1056	12	19038	114110560
GO:0051220	cytoplasmic sequestering of protein	biological_process	0.48366	1	1	1056	12	19038	114110560
GO:0051224	negative regulation of protein transport	biological_process	0.48366	1	1	1056	12	19038	114110560
GO:0004812	aminoacyl-tRNA ligase activity	molecular_function	0.48401	1	4	1056	65	19038	1.00135e+35
GO:0010876	lipid localization	biological_process	0.48407	1	7	1056	119	19038	1.01119e+62
GO:0051707	response to other organism	biological_process	0.48432	1	10	1056	173	19038	1.01108e+89
GO:0045259	proton-transporting ATP synthase complex	cellular_component	0.48516	1	4	1056	65	19038	1.01115e+35
GO:0001525	angiogenesis	biological_process	0.48593	1	1	1056	12	19038	101114341
GO:0001568	blood vessel development	biological_process	0.48593	1	1	1056	12	19038	101114341
GO:0001944	vasculature development	biological_process	0.48593	1	1	1056	12	19038	101114341
GO:0045765	regulation of angiogenesis	biological_process	0.48593	1	1	1056	12	19038	101114341
GO:0048514	blood vessel morphogenesis	biological_process	0.48593	1	1	1056	12	19038	101114341
GO:0072358	cardiovascular system development	biological_process	0.48593	1	1	1056	12	19038	101114341
GO:0072359	circulatory system development	biological_process	0.48593	1	1	1056	12	19038	101114341
GO:1901342	regulation of vasculature development	biological_process	0.48593	1	1	1056	12	19038	101114341
GO:0042375	quinone cofactor metabolic process	biological_process	0.48736	1	1	1056	12	19038	101107196
GO:0045426	quinone cofactor biosynthetic process	biological_process	0.48736	1	1	1056	12	19038	101107196
GO:0051656	establishment of organelle localization	biological_process	0.48748	1	1	1056	12	19038	101112734
GO:0006367	transcription initiation from RNA polymerase II promoter	biological_process	0.48772	1	4	1056	65	19038	1.01105e+35
GO:0009432	SOS response	biological_process	0.48775	1	1	1056	12	19038	101116317
GO:0016758	transferase activity, transferring hexosyl groups	molecular_function	0.48801	1	12	1056	210	19038	1.01108e+104
GO:0005521	lamin binding	molecular_function	0.48845	1	1	1056	12	19038	101109104
GO:0016901	oxidoreductase activity, acting on the CH-OH group of donors, quinone or similar compound as acceptor	molecular_function	0.48893	1	1	1056	12	19038	101111396
GO:0034654	nucleobase-containing compound biosynthetic process	biological_process	0.49005	1	148	1056	2671	19038	121817953,114112829,121819509,114112844,105601907,101111046,101104783,101119818,101112872,101108241,101120286,101123332,101116988,101115005,101107593,101119938,101123079,494440,101112041,XLOC_091011,114117799,101108604,101123658,101111683,100169939,101122255,101120682,101117336,101118128,114113008,101118426,101117906,101115254,101121955,101122496,101111888,114116880,101109364,101122097,101116716,…
GO:0003950	NAD+ ADP-ribosyltransferase activity	molecular_function	0.49007	1	2	1056	30	19038	1.0111e+17
GO:0016857	racemase and epimerase activity, acting on carbohydrates and derivatives	molecular_function	0.49034	1	1	1056	12	19038	101104144
GO:0016125	sterol metabolic process	biological_process	0.49051	1	1	1056	12	19038	101109104
GO:0000030	mannosyltransferase activity	molecular_function	0.49086	1	1	1056	12	19038	101104887
GO:0016765	transferase activity, transferring alkyl or aryl (other than methyl) groups	molecular_function	0.49105	1	3	1056	48	19038	1.01103e+26
GO:0004386	helicase activity	molecular_function	0.49119	1	12	1056	211	19038	1.01109e+107
GO:0060589	nucleoside-triphosphatase regulator activity	molecular_function	0.4912	1	15	1056	267	19038	1.14111e+134
GO:0006511	ubiquitin-dependent protein catabolic process	biological_process	0.49308	1	6	1056	102	19038	1.01102e+53
GO:0019941	modification-dependent protein catabolic process	biological_process	0.49308	1	6	1056	102	19038	1.01111e+53
GO:0043632	modification-dependent macromolecule catabolic process	biological_process	0.49308	1	6	1056	102	19038	1.01111e+53
GO:0006812	cation transport	biological_process	0.49441	1	43	1056	775	19038	101113095,101103792,101112385,101118367,101102032,101115005,114114866,101106047,101123332,101121071,101104978,101105216,101111508,101103311,101120286,101120875,100302624,101121174,101117892,101108864,101107815,100359412,101123528,105608906,101119372,101113595,101113020,101105791,101106745,101108165,101123578,101113744,101115095,101111069,101107980,101113504,101114615,101107395,101114773,101108027…
GO:0005801	cis-Golgi network	cellular_component	0.49525	1	2	1056	30	19038	1.01102e+17
GO:0000275	mitochondrial proton-transporting ATP synthase complex, catalytic core F(1)	cellular_component	0.49599	1	1	1056	12	19038	100302103
GO:0016624	oxidoreductase activity, acting on the aldehyde or oxo group of donors, disulfide as acceptor	molecular_function	0.49604	1	1	1056	12	19038	100145857
GO:0005975	carbohydrate metabolic process	biological_process	0.49607	1	32	1056	575	19038	101114124,101111396,101102848,100216440,101103203,105603785,101120570,101104887,101104089,105616599,100302303,100144763,105610042,100037660,101110249,101106382,101113336,101122194,443048,105608906,114118046,101111046,101114008,101103983,101119116,100145858,101118240,554320,101111508,101112844,101106243,443489
GO:0044724	single-organism carbohydrate catabolic process	biological_process	0.49642	1	3	1056	48	19038	4.43489e+23
GO:1901264	carbohydrate derivative transport	biological_process	0.49654	1	1	1056	12	19038	101115095
GO:0019438	aromatic compound biosynthetic process	biological_process	0.49754	1	155	1056	2802	19038	101110078,101104912,101119036,443469,114112825,114109630,101112344,101121321,105603087,101104979,101108529,105606599,114111703,114113147,101114012,101109765,101103140,101116889,101114511,101109224,101121174,114110261,101117020,101107196,101105321,101107672,101117043,100302103,101115026,101110423,114113207,101120348,101103105,101112975,101121441,101121510,101111979,101117613,101111927,101103311,10…
GO:0019082	viral protein processing	biological_process	0.49889	1	2	1056	30	19038	1.01105e+17
GO:0000077	DNA damage checkpoint	biological_process	0.49908	1	1	1056	12	19038	443155
GO:0031570	DNA integrity checkpoint	biological_process	0.49908	1	1	1056	12	19038	443155
GO:0015985	energy coupled proton transport, down electrochemical gradient	biological_process	0.4992	1	4	1056	66	19038	1.01115e+35
GO:0015986	ATP synthesis coupled proton transport	biological_process	0.4992	1	4	1056	66	19038	1.01115e+35
GO:0016887	ATPase activity	molecular_function	0.49927	1	23	1056	413	19038	1.01111e+206
GO:0032268	regulation of cellular protein metabolic process	biological_process	0.50022	1	4	1056	66	19038	1.1411e+35
GO:0008417	fucosyltransferase activity	molecular_function	0.50025	1	1	1056	12	19038	101104089
GO:0000988	protein binding transcription factor activity	molecular_function	0.50033	1	13	1056	231	19038	1.01111e+113
GO:0043234	protein complex	cellular_component	0.50162	1	111	1056	2006	19038	101102976,101114097,101115254,114113008,101116236,101120572,101118128,101106745,101104467,101106631,101101879,114112826,101103257,101119619,101110893,101108604,101118296,101122615,101122054,101118583,101108027,101115114,101110976,101116260,101119460,101106373,101106681,101110342,114116085,101104660,101106068,101119848,105605646,114116088,114108725,101110936,101115974,101121962,101115005,101123332…
GO:0051536	iron-sulfur cluster binding	molecular_function	0.50277	1	7	1056	122	19038	1.01107e+59
GO:0051540	metal cluster binding	molecular_function	0.50277	1	7	1056	122	19038	1.0112e+59
GO:1901681	sulfur compound binding	molecular_function	0.50284	1	3	1056	49	19038	7.8046e+23
GO:0009523	photosystem II	cellular_component	0.5067	1	5	1056	85	19038	1.01105e+44
GO:0006418	tRNA aminoacylation for protein translation	biological_process	0.50692	1	4	1056	67	19038	1.00135e+35
GO:0006576	cellular biogenic amine metabolic process	biological_process	0.50749	1	4	1056	67	19038	1.01109e+35
GO:0044106	cellular amine metabolic process	biological_process	0.50749	1	4	1056	67	19038	1.01114e+35
GO:0016044	cellular membrane organization	biological_process	0.50856	1	6	1056	104	19038	1.05609e+53
GO:0009110	vitamin biosynthetic process	biological_process	0.50911	1	3	1056	49	19038	1.01111e+26
GO:0042364	water-soluble vitamin biosynthetic process	biological_process	0.50911	1	3	1056	49	19038	1.01111e+26
GO:0051239	regulation of multicellular organismal process	biological_process	0.51122	1	6	1056	104	19038	1.01123e+53
GO:0051246	regulation of protein metabolic process	biological_process	0.51212	1	4	1056	67	19038	1.1411e+35
GO:0006040	amino sugar metabolic process	biological_process	0.51228	1	2	1056	31	19038	1.01109e+17
GO:0016615	malate dehydrogenase activity	molecular_function	0.51259	1	1	1056	13	19038	101115188
GO:0016597	amino acid binding	molecular_function	0.51332	1	1	1056	13	19038	101106741
GO:0009152	purine ribonucleotide biosynthetic process	biological_process	0.51401	1	8	1056	141	19038	1.00302e+71
GO:0044255	cellular lipid metabolic process	biological_process	0.51449	1	15	1056	270	19038	1.01122e+134
GO:0042278	purine nucleoside metabolic process	biological_process	0.51491	1	8	1056	141	19038	1.01121e+71
GO:0046128	purine ribonucleoside metabolic process	biological_process	0.51491	1	8	1056	141	19038	1.00302e+71
GO:0006629	lipid metabolic process	biological_process	0.51529	1	26	1056	471	19038	100145857,101106373,105612589,105608906,101118054,101119014,101114703,101114996,105613287,114118432,101107157,101119865,101106243,105605809,101121761,101115040,101106160,101113438,101111268,101105505,443335,101103983,101119116,101109104,101117633,101121954
GO:0032324	molybdopterin cofactor biosynthetic process	biological_process	0.51531	1	1	1056	13	19038	101119420
GO:0043545	molybdopterin cofactor metabolic process	biological_process	0.51531	1	1	1056	13	19038	101119420
GO:0005057	receptor signaling protein activity	molecular_function	0.51597	1	1	1056	13	19038	101104305
GO:0042398	cellular modified amino acid biosynthetic process	biological_process	0.51667	1	3	1056	50	19038	1.01105e+26
GO:0008272	sulfate transport	biological_process	0.51674	1	1	1056	13	19038	101119854
GO:0015116	sulfate transmembrane transporter activity	molecular_function	0.51674	1	1	1056	13	19038	101119854
GO:0007243	intracellular protein kinase cascade	biological_process	0.51697	1	2	1056	31	19038	1.01114e+17
GO:0004312	fatty acid synthase activity	molecular_function	0.51733	1	1	1056	13	19038	101117221
GO:0005891	voltage-gated calcium channel complex	cellular_component	0.51769	1	1	1056	13	19038	101104978
GO:0034704	calcium channel complex	cellular_component	0.51769	1	1	1056	13	19038	101104978
GO:0033588	Elongator holoenzyme complex	cellular_component	0.51781	1	1	1056	13	19038	101115117
GO:0006403	RNA localization	biological_process	0.51794	1	4	1056	68	19038	1.01112e+32
GO:0050657	nucleic acid transport	biological_process	0.51794	1	4	1056	68	19038	1.00359e+32
GO:0050658	RNA transport	biological_process	0.51794	1	4	1056	68	19038	1.00359e+32
GO:0051236	establishment of RNA localization	biological_process	0.51794	1	4	1056	68	19038	1.01112e+32
GO:0007275	multicellular organismal development	biological_process	0.518	1	20	1056	359	19038	1.01102e+179
GO:0007249	I-kappaB kinase/NF-kappaB cascade	biological_process	0.518	1	1	1056	13	19038	101114341
GO:0043122	regulation of I-kappaB kinase/NF-kappaB cascade	biological_process	0.518	1	1	1056	13	19038	101114341
GO:0043123	positive regulation of I-kappaB kinase/NF-kappaB cascade	biological_process	0.518	1	1	1056	13	19038	101114341
GO:0000989	transcription factor binding transcription factor activity	molecular_function	0.5182	1	11	1056	197	19038	1.01112e+95
GO:0003712	transcription cofactor activity	molecular_function	0.5182	1	11	1056	197	19038	1.01112e+95
GO:1901698	response to nitrogen compound	biological_process	0.51838	1	1	1056	13	19038	101118819
GO:0009142	nucleoside triphosphate biosynthetic process	biological_process	0.51869	1	5	1056	86	19038	1.00302e+44
GO:0009145	purine nucleoside triphosphate biosynthetic process	biological_process	0.51869	1	5	1056	86	19038	1.01123e+44
GO:0009201	ribonucleoside triphosphate biosynthetic process	biological_process	0.51869	1	5	1056	86	19038	1.01121e+44
GO:0009206	purine ribonucleoside triphosphate biosynthetic process	biological_process	0.51869	1	5	1056	86	19038	1.01123e+44
GO:0009279	cell outer membrane	cellular_component	0.51886	1	1	1056	13	19038	497271
GO:0009084	glutamine family amino acid biosynthetic process	biological_process	0.51902	1	1	1056	13	19038	101104144
GO:0007167	enzyme linked receptor protein signaling pathway	biological_process	0.51992	1	2	1056	32	19038	1.01123e+17
GO:0007169	transmembrane receptor protein tyrosine kinase signaling pathway	biological_process	0.51992	1	2	1056	32	19038	1.01123e+17
GO:0016892	endoribonuclease activity, producing 3'-phosphomonoesters	molecular_function	0.51998	1	1	1056	13	19038	101107041
GO:0000165	MAPK cascade	biological_process	0.52024	1	1	1056	13	19038	114109630
GO:0043408	regulation of MAPK cascade	biological_process	0.52024	1	1	1056	13	19038	114109630
GO:0009218	pyrimidine ribonucleotide metabolic process	biological_process	0.52025	1	1	1056	13	19038	101119865
GO:0009220	pyrimidine ribonucleotide biosynthetic process	biological_process	0.52025	1	1	1056	13	19038	101119865
GO:0046131	pyrimidine ribonucleoside metabolic process	biological_process	0.52071	1	1	1056	13	19038	101102378
GO:0019083	viral transcription	biological_process	0.5208	1	1	1056	13	19038	101115254
GO:0008191	metalloendopeptidase inhibitor activity	molecular_function	0.52107	1	1	1056	13	19038	101103339
GO:0010576	metalloenzyme regulator activity	molecular_function	0.52107	1	1	1056	13	19038	101103339
GO:0048551	metalloenzyme inhibitor activity	molecular_function	0.52107	1	1	1056	13	19038	101103339
GO:0006821	chloride transport	biological_process	0.52137	1	1	1056	13	19038	101111082
GO:0005942	phosphatidylinositol 3-kinase complex	cellular_component	0.52207	1	1	1056	13	19038	101104783
GO:0005944	1-phosphatidylinositol-4-phosphate 3-kinase, class IB complex	cellular_component	0.52207	1	1	1056	13	19038	101104783
GO:0035014	phosphatidylinositol 3-kinase regulator activity	molecular_function	0.52207	1	1	1056	13	19038	101104783
GO:0046935	1-phosphatidylinositol-3-kinase regulator activity	molecular_function	0.52207	1	1	1056	13	19038	101104783
GO:0042886	amide transport	biological_process	0.52252	1	1	1056	13	19038	101105365
GO:0032774	RNA biosynthetic process	biological_process	0.52285	1	137	1056	2487	19038	101122496,101118128,114113008,101118426,101117906,101115254,101121955,101123658,101122255,100169939,101120682,101117336,114117799,101108604,101119938,101107593,101123079,494440,101112041,XLOC_091011,101116988,101104783,101119818,101112872,101108241,101120286,121817953,114112829,121819509,114112844,105601907,101111046,101107089,101109695,101117537,106991182,101123507,101119854,101104487,101102102,…
GO:0051861	glycolipid binding	molecular_function	0.52299	1	1	1056	13	19038	101115095
GO:0003993	acid phosphatase activity	molecular_function	0.5236	1	7	1056	126	19038	1.01113e+62
GO:0097367	carbohydrate derivative binding	molecular_function	0.52413	1	4	1056	69	19038	1.01103e+29
GO:0008948	oxaloacetate decarboxylase activity	molecular_function	0.52493	1	2	1056	32	19038	1.01113e+17
GO:0035725	sodium ion transmembrane transport	biological_process	0.52493	1	2	1056	32	19038	1.01113e+17
GO:0071436	sodium ion export	biological_process	0.52493	1	2	1056	32	19038	1.01113e+17
GO:0071949	FAD binding	molecular_function	0.5253	1	2	1056	32	19038	1.0112e+17
GO:0015081	sodium ion transmembrane transporter activity	molecular_function	0.52585	1	6	1056	107	19038	1.01124e+53
GO:0007050	cell cycle arrest	biological_process	0.52598	1	1	1056	13	19038	101113020
GO:0070008	serine-type exopeptidase activity	molecular_function	0.52724	1	3	1056	51	19038	1.01107e+26
GO:0007218	neuropeptide signaling pathway	biological_process	0.52774	1	4	1056	69	19038	1.01109e+32
GO:0044057	regulation of system process	biological_process	0.52988	1	2	1056	32	19038	1.01107e+17
GO:0019867	outer membrane	cellular_component	0.53263	1	10	1056	180	19038	1.01106e+83
GO:0006505	GPI anchor metabolic process	biological_process	0.53508	1	3	1056	51	19038	1.01106e+26
GO:0019829	cation-transporting ATPase activity	molecular_function	0.53671	1	2	1056	32	19038	1.01111e+17
GO:0042625	ATPase activity, coupled to transmembrane movement of ions	molecular_function	0.53671	1	2	1056	32	19038	1.01115e+17
GO:0006766	vitamin metabolic process	biological_process	0.53692	1	3	1056	51	19038	1.01116e+26
GO:0006767	water-soluble vitamin metabolic process	biological_process	0.53692	1	3	1056	51	19038	1.01111e+26
GO:0009190	cyclic nucleotide biosynthetic process	biological_process	0.53718	1	2	1056	33	19038	1.01106e+17
GO:0019439	aromatic compound catabolic process	biological_process	0.53731	1	7	1056	126	19038	1.0112e+62
GO:0042262	DNA protection	biological_process	0.53762	1	1	1056	13	19038	101109971
GO:0001539	ciliary or bacterial-type flagellar motility	biological_process	0.53786	1	2	1056	32	19038	114115360780452
GO:0071973	bacterial-type flagellar cell motility	biological_process	0.53786	1	2	1056	32	19038	780452114115360
GO:0065009	regulation of molecular function	biological_process	0.5384	1	8	1056	144	19038	1.01118e+71
GO:0006836	neurotransmitter transport	biological_process	0.53878	1	2	1056	33	19038	1.01121e+17
GO:0009539	photosystem II reaction center	cellular_component	0.5388	1	3	1056	51	19038	1.01121e+26
GO:0007009	plasma membrane organization	biological_process	0.53974	1	1	1056	14	19038	101119420
GO:0031410	cytoplasmic vesicle	cellular_component	0.54009	1	7	1056	126	19038	1.01123e+59
GO:0015931	nucleobase-containing compound transport	biological_process	0.54163	1	4	1056	70	19038	4.97271e+32
GO:0030865	cortical cytoskeleton organization	biological_process	0.5423	1	1	1056	14	19038	114111326
GO:0030866	cortical actin cytoskeleton organization	biological_process	0.5423	1	1	1056	14	19038	114111326
GO:0006323	DNA packaging	biological_process	0.54243	1	5	1056	87	19038	1.01105e+44
GO:1901682	sulfur compound transmembrane transporter activity	molecular_function	0.54261	1	1	1056	14	19038	101119854
GO:0051640	organelle localization	biological_process	0.54278	1	1	1056	14	19038	101112734
GO:0043161	proteasomal ubiquitin-dependent protein catabolic process	biological_process	0.54327	1	1	1056	14	19038	101110809
GO:0000394	RNA splicing, via endonucleolytic cleavage and ligation	biological_process	0.54357	1	1	1056	14	19038	101107041
GO:0006388	tRNA splicing, via endonucleolytic cleavage and ligation	biological_process	0.54357	1	1	1056	14	19038	101107041
GO:0055082	cellular chemical homeostasis	biological_process	0.54555	1	5	1056	87	19038	1.01106e+44
GO:0044708	single-organism behavior	biological_process	0.54555	1	1	1056	14	19038	114109630
GO:0006164	purine nucleotide biosynthetic process	biological_process	0.54596	1	8	1056	145	19038	1.00302e+71
GO:0051539	4 iron, 4 sulfur cluster binding	molecular_function	0.54647	1	1	1056	14	19038	101119344
GO:0043631	RNA polyadenylation	biological_process	0.54726	1	1	1056	14	19038	101104660
GO:0009126	purine nucleoside monophosphate metabolic process	biological_process	0.54887	1	1	1056	14	19038	101104979
GO:0009127	purine nucleoside monophosphate biosynthetic process	biological_process	0.54887	1	1	1056	14	19038	101104979
GO:0009167	purine ribonucleoside monophosphate metabolic process	biological_process	0.54887	1	1	1056	14	19038	101104979
GO:0009168	purine ribonucleoside monophosphate biosynthetic process	biological_process	0.54887	1	1	1056	14	19038	101104979
GO:0044179	hemolysis in other organism	biological_process	0.5491	1	1	1056	14	19038	101111508
GO:0051715	cytolysis in other organism	biological_process	0.5491	1	1	1056	14	19038	101111508
GO:0009236	cobalamin biosynthetic process	biological_process	0.54916	1	2	1056	33	19038	1.01111e+17
GO:0005666	DNA-directed RNA polymerase III complex	cellular_component	0.55026	1	1	1056	14	19038	101110976
GO:0052547	regulation of peptidase activity	biological_process	0.55101	1	2	1056	33	19038	1.01103e+17
GO:0052548	regulation of endopeptidase activity	biological_process	0.55101	1	2	1056	33	19038	1.01103e+17
GO:0002429	immune response-activating cell surface receptor signaling pathway	biological_process	0.55106	1	1	1056	14	19038	101102917
GO:0002757	immune response-activating signal transduction	biological_process	0.55106	1	1	1056	14	19038	101102917
GO:0002768	immune response-regulating cell surface receptor signaling pathway	biological_process	0.55106	1	1	1056	14	19038	101102917
GO:0050851	antigen receptor-mediated signaling pathway	biological_process	0.55106	1	1	1056	14	19038	101102917
GO:0019200	carbohydrate kinase activity	molecular_function	0.55142	1	2	1056	33	19038	100302303443489
GO:0051016	barbed-end actin filament capping	biological_process	0.55177	1	1	1056	14	19038	101110976
GO:0006260	DNA replication	biological_process	0.55204	1	24	1056	441	19038	101119599,101117654,101107348,101115188,101116236,101108399,101116988,101116317,114116607,443155,114109630,101104783,XLOC_069361,101112645,101110342,101110976,121817953,101109364,101121697,101123336,101106958,105616742,100359412,101116716
GO:0048038	quinone binding	molecular_function	0.55211	1	1	1056	14	19038	101111396
GO:0031124	mRNA 3'-end processing	biological_process	0.55338	1	1	1056	14	19038	101104660
GO:0009187	cyclic nucleotide metabolic process	biological_process	0.55447	1	2	1056	34	19038	1.01106e+17
GO:0003899	DNA-directed RNA polymerase activity	molecular_function	0.5569	1	12	1056	220	19038	1.14117e+107
GO:0004553	hydrolase activity, hydrolyzing O-glycosyl compounds	molecular_function	0.55804	1	11	1056	203	19038	1.01112e+98
GO:0007409	axonogenesis	biological_process	0.56097	1	2	1056	34	19038	1.01114e+17
GO:0007411	axon guidance	biological_process	0.56097	1	2	1056	34	19038	1.01103e+17
GO:0048667	cell morphogenesis involved in neuron differentiation	biological_process	0.56097	1	2	1056	34	19038	1.01103e+17
GO:0048812	neuron projection morphogenesis	biological_process	0.56097	1	2	1056	34	19038	1.01114e+17
GO:0061564	axon development	biological_process	0.56097	1	2	1056	34	19038	1.01103e+17
GO:0097485	neuron projection guidance	biological_process	0.56097	1	2	1056	34	19038	1.01103e+17
GO:0000990	core RNA polymerase binding transcription factor activity	molecular_function	0.56127	1	2	1056	34	19038	1.01118e+17
GO:0000996	core DNA-dependent RNA polymerase binding promoter specificity activity	molecular_function	0.56127	1	2	1056	34	19038	1.01118e+17
GO:0016987	sigma factor activity	molecular_function	0.56127	1	2	1056	34	19038	1.01111e+17
GO:0015988	energy coupled proton transmembrane transport, against electrochemical gradient	biological_process	0.5621	1	6	1056	109	19038	1.01104e+53
GO:0015991	ATP hydrolysis coupled proton transport	biological_process	0.5621	1	6	1056	109	19038	1.01104e+53
GO:0006096	glycolysis	biological_process	0.56355	1	2	1056	34	19038	443489100216440
GO:0051641	cellular localization	biological_process	0.56424	1	49	1056	906	19038	101112734,101101892,101118583,101108027,101114615,101110893,101122615,101122054,101118296,101101940,101113504,101113077,101119870,101116769,101122306,101115680,101120572,101114648,101110809,114110560,101119619,101104887,101106631,101101879,114112844,101107318,101109364,101110591,114115360,105616092,100359412,101121484,101102047,101115883,101110723,101111654,101114679,101111508,101117600,101101929…
GO:0048193	Golgi vesicle transport	biological_process	0.56499	1	8	1056	147	19038	1.01111e+71
GO:0003678	DNA helicase activity	molecular_function	0.56528	1	6	1056	110	19038	1.01115e+53
GO:0031982	vesicle	cellular_component	0.56552	1	7	1056	129	19038	4.43078e+59
GO:0090066	regulation of anatomical structure size	biological_process	0.56553	1	3	1056	53	19038	1.01123e+26
GO:0031625	ubiquitin protein ligase binding	molecular_function	0.56613	1	1	1056	15	19038	101101892
GO:0044389	small conjugating protein ligase binding	molecular_function	0.56613	1	1	1056	15	19038	101101892
GO:0019835	cytolysis	biological_process	0.5664	1	1	1056	15	19038	100192427
GO:0072348	sulfur compound transport	biological_process	0.56725	1	1	1056	15	19038	101119854
GO:0010498	proteasomal protein catabolic process	biological_process	0.56955	1	1	1056	15	19038	101110809
GO:0000096	sulfur amino acid metabolic process	biological_process	0.56968	1	1	1056	15	19038	114108841
GO:0010740	positive regulation of intracellular protein kinase cascade	biological_process	0.57001	1	1	1056	15	19038	101114341
GO:0043044	ATP-dependent chromatin remodeling	biological_process	0.57001	1	1	1056	15	19038	114112844
GO:0016703	oxidoreductase activity, acting on single donors with incorporation of molecular oxygen, incorporation of one atom of oxygen (internal monooxygenases or internal mixed function oxidases)	molecular_function	0.57009	1	1	1056	15	19038	101104144
GO:0004535	poly(A)-specific ribonuclease activity	molecular_function	0.57049	1	1	1056	15	19038	101119719
GO:0003743	translation initiation factor activity	molecular_function	0.57119	1	3	1056	53	19038	1.01113e+26
GO:0009360	DNA polymerase III complex	cellular_component	0.57193	1	1	1056	15	19038	101108399
GO:0042575	DNA polymerase complex	cellular_component	0.57193	1	1	1056	15	19038	101108399
GO:0019238	cyclohydrolase activity	molecular_function	0.57217	1	1	1056	15	19038	101109224
GO:0008544	epidermis development	biological_process	0.57332	1	2	1056	34	19038	1.01105e+17
GO:0043588	skin development	biological_process	0.57332	1	2	1056	34	19038	1.01105e+17
GO:0016671	oxidoreductase activity, acting on a sulfur group of donors, disulfide as acceptor	molecular_function	0.57472	1	1	1056	15	19038	101117221
GO:0032940	secretion by cell	biological_process	0.57479	1	6	1056	111	19038	1.14115e+53
GO:0039526	modulation by virus of host apoptotic process	biological_process	0.57507	1	1	1056	15	19038	114118872
GO:0044531	modulation of programmed cell death in other organism	biological_process	0.57507	1	1	1056	15	19038	114118872
GO:0044532	modulation of apoptotic process in other organism	biological_process	0.57507	1	1	1056	15	19038	114118872
GO:0052040	modulation by symbiont of host programmed cell death	biological_process	0.57507	1	1	1056	15	19038	114118872
GO:0052150	modulation by symbiont of host apoptotic process	biological_process	0.57507	1	1	1056	15	19038	114118872
GO:0052248	modulation of programmed cell death in other organism involved in symbiotic interaction	biological_process	0.57507	1	1	1056	15	19038	114118872
GO:0052433	modulation by organism of apoptotic process in other organism involved in symbiotic interaction	biological_process	0.57507	1	1	1056	15	19038	114118872
GO:0070887	cellular response to chemical stimulus	biological_process	0.57559	1	5	1056	93	19038	1.01112e+44
GO:0002764	immune response-regulating signaling pathway	biological_process	0.57568	1	1	1056	15	19038	101102917
GO:0006303	double-strand break repair via nonhomologous end joining	biological_process	0.57622	1	1	1056	15	19038	101121889
GO:0033108	mitochondrial respiratory chain complex assembly	biological_process	0.57632	1	1	1056	15	19038	101111245
GO:0005179	hormone activity	molecular_function	0.57666	1	14	1056	259	19038	1.14113e+122
GO:0008375	acetylglucosaminyltransferase activity	molecular_function	0.57703	1	2	1056	35	19038	1.14118e+17
GO:0046961	proton-transporting ATPase activity, rotational mechanism	molecular_function	0.57862	1	1	1056	15	19038	101115005
GO:0044391	ribosomal subunit	cellular_component	0.57951	1	1	1056	15	19038	101115275
GO:0043085	positive regulation of catalytic activity	biological_process	0.57957	1	2	1056	35	19038	1.01104e+17
GO:0044093	positive regulation of molecular function	biological_process	0.57957	1	2	1056	35	19038	1.01104e+17
GO:0016628	oxidoreductase activity, acting on the CH-CH group of donors, NAD or NADP as acceptor	molecular_function	0.58	1	2	1056	35	19038	1.01117e+17
GO:0006818	hydrogen transport	biological_process	0.58072	1	10	1056	186	19038	1.01104e+89
GO:0015992	proton transport	biological_process	0.58072	1	10	1056	186	19038	1.01108e+89
GO:0009235	cobalamin metabolic process	biological_process	0.58205	1	2	1056	35	19038	1.01108e+17
GO:0009966	regulation of signal transduction	biological_process	0.58225	1	12	1056	226	19038	1.01102e+107
GO:0046903	secretion	biological_process	0.5843	1	6	1056	112	19038	1.14115e+53
GO:0015370	solute:sodium symporter activity	molecular_function	0.58585	1	2	1056	36	19038	1.01121e+17
GO:0035821	modification of morphology or physiology of other organism	biological_process	0.58661	1	7	1056	131	19038	114115360,114118872,XLOC_069361,101114615,101116769,101117537,101111508
GO:0008654	phospholipid biosynthetic process	biological_process	0.58708	1	4	1056	74	19038	1.01104e+35
GO:0006351	transcription, DNA-dependent	biological_process	0.58764	1	134	1056	2464	19038	121817953,114112844,121819509,114112829,105601907,101111046,101112872,101119818,101104783,101108241,101120286,101116988,101107593,101119938,101123079,494440,XLOC_091011,101112041,101108604,114117799,101123658,101120682,100169939,101122255,101117336,114113008,101118426,101118128,101117906,101121955,101122496,101111888,101109364,114116880,101122097,101107815,114118046,101107860,101119408,100302349,…
GO:0007610	behavior	biological_process	0.58782	1	3	1056	55	19038	1.1411e+26
GO:0044432	endoplasmic reticulum part	cellular_component	0.58841	1	10	1056	188	19038	1.01111e+89
GO:0005044	scavenger receptor activity	molecular_function	0.58939	1	3	1056	56	19038	4.43148e+23
GO:0038024	cargo receptor activity	molecular_function	0.58939	1	3	1056	56	19038	1.0699e+23
GO:0008238	exopeptidase activity	molecular_function	0.59026	1	7	1056	133	19038	1.01104e+62
GO:0008652	cellular amino acid biosynthetic process	biological_process	0.59036	1	7	1056	132	19038	1.01116e+62
GO:1901068	guanosine-containing compound metabolic process	biological_process	0.59038	1	2	1056	36	19038	1.01105e+17
GO:0005272	sodium channel activity	molecular_function	0.59039	1	2	1056	36	19038	1.01108e+17
GO:0003729	mRNA binding	molecular_function	0.59041	1	1	1056	16	19038	101104660
GO:0019842	vitamin binding	molecular_function	0.59101	1	2	1056	36	19038	1.00146e+17
GO:0032787	monocarboxylic acid metabolic process	biological_process	0.59131	1	5	1056	94	19038	1.01118e+44
GO:0004866	endopeptidase inhibitor activity	molecular_function	0.59183	1	7	1056	131	19038	1.01103e+62
GO:0061135	endopeptidase regulator activity	molecular_function	0.59183	1	7	1056	131	19038	1.01112e+62
GO:0006879	cellular iron ion homeostasis	biological_process	0.5919	1	2	1056	34	19038	1.01106e+17
GO:0055072	iron ion homeostasis	biological_process	0.5919	1	2	1056	34	19038	1.01115e+17
GO:0072522	purine-containing compound biosynthetic process	biological_process	0.59245	1	8	1056	151	19038	1.01115e+71
GO:0044380	protein localization to cytoskeleton	biological_process	0.59247	1	1	1056	16	19038	101121484
GO:0071988	protein localization to spindle pole body	biological_process	0.59247	1	1	1056	16	19038	101121484
GO:0005778	peroxisomal membrane	cellular_component	0.59263	1	1	1056	16	19038	101116330
GO:0031903	microbody membrane	cellular_component	0.59263	1	1	1056	16	19038	101116330
GO:0044438	microbody part	cellular_component	0.59263	1	1	1056	16	19038	101116330
GO:0044439	peroxisomal part	cellular_component	0.59263	1	1	1056	16	19038	101116330
GO:0016854	racemase and epimerase activity	molecular_function	0.59266	1	1	1056	16	19038	101104144
GO:0003688	DNA replication origin binding	molecular_function	0.59282	1	1	1056	16	19038	114109630
GO:0007268	synaptic transmission	biological_process	0.59288	1	1	1056	16	19038	101111396
GO:0019226	transmission of nerve impulse	biological_process	0.59288	1	1	1056	16	19038	101111396
GO:0035637	multicellular organismal signaling	biological_process	0.59288	1	1	1056	16	19038	101111396
GO:0051189	prosthetic group metabolic process	biological_process	0.59319	1	1	1056	16	19038	101119420
GO:0006163	purine nucleotide metabolic process	biological_process	0.59359	1	10	1056	189	19038	1.01121e+89
GO:0005874	microtubule	cellular_component	0.5939	1	2	1056	36	19038	1.0112e+17
GO:0017080	sodium channel regulator activity	molecular_function	0.59462	1	2	1056	36	19038	1.14118e+17
GO:0019871	sodium channel inhibitor activity	molecular_function	0.59462	1	2	1056	36	19038	1.14118e+17
GO:0006817	phosphate ion transport	biological_process	0.59509	1	1	1056	16	19038	101104441
GO:0015662	ATPase activity, coupled to transmembrane movement of ions, phosphorylative mechanism	molecular_function	0.5952	1	1	1056	16	19038	101111268
GO:0016894	endonuclease activity, active with either ribo- or deoxyribonucleic acids and producing 3'-phosphomonoesters	molecular_function	0.59577	1	1	1056	16	19038	101107041
GO:0042451	purine nucleoside biosynthetic process	biological_process	0.59592	1	6	1056	113	19038	1.01105e+53
GO:0046129	purine ribonucleoside biosynthetic process	biological_process	0.59592	1	6	1056	113	19038	1.01121e+53
GO:0009888	tissue development	biological_process	0.59618	1	3	1056	55	19038	1.01105e+26
GO:0001907	killing by symbiont of host cells	biological_process	0.59713	1	1	1056	16	19038	114118872
GO:0044004	disruption by symbiont of host cell	biological_process	0.59713	1	1	1056	16	19038	114118872
GO:0019220	regulation of phosphate metabolic process	biological_process	0.59823	1	5	1056	94	19038	1.01122e+44
GO:0051174	regulation of phosphorus metabolic process	biological_process	0.59823	1	5	1056	94	19038	1.01122e+44
GO:0009967	positive regulation of signal transduction	biological_process	0.59899	1	2	1056	36	19038	1.01114e+17
GO:0010647	positive regulation of cell communication	biological_process	0.59899	1	2	1056	36	19038	1.01114e+17
GO:0023056	positive regulation of signaling	biological_process	0.59899	1	2	1056	36	19038	1.01114e+17
GO:0071702	organic substance transport	biological_process	0.59989	1	57	1056	1064	19038	101102047,101115883,101110723,101111654,101114679,101119091,114110561,101109364,101121793,101110591,101105321,114115360,100359412,105616092,101105365,101107055,101106160,114117822,101123169,101105547,101120350,101103792,101119078,101111508,101105069,101117600,101101929,101115974,101121962,101103411,101113504,101115095,101111901,XLOC_125215,105612052,101119870,497271,101106373,101110976,101101892,…
GO:1901564	organonitrogen compound metabolic process	biological_process	0.60095	1	48	1056	899	19038	101115005,101115974,101105117,101123332,101104144,101109811,100302103,101113906,101104473,101118367,101122097,114108841,101107196,101117043,121819509,101119420,101109364,101116528,101104908,XLOC_069361,101109224,101110723,101119091,101120796,101113871,101114859,101102378,101120875,101115927,100188975,101105429,101106890,114116607,114110625,101105735,101118128,101119865,101115127,101113998,1011049…
GO:0051346	negative regulation of hydrolase activity	biological_process	0.60142	1	2	1056	36	19038	1.05606e+17
GO:0009617	response to bacterium	biological_process	0.60158	1	4	1056	75	19038	1.0112e+35
GO:0042742	defense response to bacterium	biological_process	0.60158	1	4	1056	75	19038	1.0112e+35
GO:0003924	GTPase activity	molecular_function	0.60165	1	20	1056	376	19038	1.01116e+179
GO:0051028	mRNA transport	biological_process	0.60172	1	3	1056	56	19038	1.00359e+23
GO:0044769	ATPase activity, coupled to transmembrane movement of ions, rotational mechanism	molecular_function	0.60273	1	1	1056	16	19038	101115005
GO:0046916	cellular transition metal ion homeostasis	biological_process	0.60667	1	2	1056	35	19038	1.01115e+17
GO:0005230	extracellular ligand-gated ion channel activity	molecular_function	0.60716	1	5	1056	96	19038	1.01105e+44
GO:0032880	regulation of protein localization	biological_process	0.60816	1	1	1056	17	19038	114110560
GO:0051223	regulation of protein transport	biological_process	0.60816	1	1	1056	17	19038	114110560
GO:0070201	regulation of establishment of protein localization	biological_process	0.60816	1	1	1056	17	19038	114110560
GO:0016875	ligase activity, forming carbon-oxygen bonds	molecular_function	0.60961	1	4	1056	76	19038	1.01107e+35
GO:0016876	ligase activity, forming aminoacyl-tRNA and related compounds	molecular_function	0.60961	1	4	1056	76	19038	1.01119e+35
GO:0004383	guanylate cyclase activity	molecular_function	0.60989	1	1	1056	17	19038	101105735
GO:0006182	cGMP biosynthetic process	biological_process	0.60989	1	1	1056	17	19038	101105735
GO:0046068	cGMP metabolic process	biological_process	0.60989	1	1	1056	17	19038	101105735
GO:0046488	phosphatidylinositol metabolic process	biological_process	0.61209	1	4	1056	77	19038	1.01118e+35
GO:0010646	regulation of cell communication	biological_process	0.61276	1	12	1056	231	19038	1.01123e+107
GO:0046700	heterocycle catabolic process	biological_process	0.61349	1	6	1056	116	19038	1.01116e+53
GO:0005516	calmodulin binding	molecular_function	0.61411	1	2	1056	37	19038	1.01108e+17
GO:0016782	transferase activity, transferring sulfur-containing groups	molecular_function	0.6145	1	4	1056	77	19038	1.00302e+35
GO:0009975	cyclase activity	molecular_function	0.61469	1	2	1056	38	19038	1.01106e+17
GO:0015932	nucleobase-containing compound transmembrane transporter activity	molecular_function	0.61471	1	1	1056	17	19038	101111901
GO:0000175	3'-5'-exoribonuclease activity	molecular_function	0.61524	1	1	1056	17	19038	101119719
GO:0006091	generation of precursor metabolites and energy	biological_process	0.61553	1	12	1056	231	19038	1.14118e+104
GO:0006979	response to oxidative stress	biological_process	0.61579	1	2	1056	37	19038	1.01111e+17
GO:0010608	posttranscriptional regulation of gene expression	biological_process	0.61631	1	2	1056	37	19038	1.01115e+17
GO:0001934	positive regulation of protein phosphorylation	biological_process	0.61706	1	1	1056	17	19038	114109630
GO:0042327	positive regulation of phosphorylation	biological_process	0.61706	1	1	1056	17	19038	114109630
GO:0034453	microtubule anchoring	biological_process	0.6172	1	2	1056	38	19038	1.0112e+17
GO:0007131	reciprocal meiotic recombination	biological_process	0.61721	1	1	1056	17	19038	114115360
GO:0035825	reciprocal DNA recombination	biological_process	0.61721	1	1	1056	17	19038	114115360
GO:0031683	G-protein beta/gamma-subunit complex binding	molecular_function	0.61731	1	5	1056	95	19038	1.01106e+44
GO:0051205	protein insertion into membrane	biological_process	0.61756	1	1	1056	17	19038	101113077
GO:0051668	localization within membrane	biological_process	0.61756	1	1	1056	17	19038	101113077
GO:0006261	DNA-dependent DNA replication	biological_process	0.61832	1	6	1056	115	19038	1.01117e+53
GO:1901070	guanosine-containing compound biosynthetic process	biological_process	0.61871	1	1	1056	17	19038	101104979
GO:0023051	regulation of signaling	biological_process	0.61924	1	12	1056	232	19038	1.01107e+107
GO:0034702	ion channel complex	cellular_component	0.61924	1	2	1056	38	19038	1.01105e+17
GO:0034703	cation channel complex	cellular_component	0.61924	1	2	1056	38	19038	1.01105e+17
GO:0051818	disruption of cells of other organism involved in symbiotic interaction	biological_process	0.61932	1	1	1056	17	19038	114118872
GO:0051883	killing of cells in other organism involved in symbiotic interaction	biological_process	0.61932	1	1	1056	17	19038	114118872
GO:0044000	movement in host	biological_process	0.61938	1	1	1056	17	19038	101104661
GO:0046739	spread of virus in multicellular host	biological_process	0.61938	1	1	1056	17	19038	101104661
GO:0046740	spread of virus in host, cell to cell	biological_process	0.61938	1	1	1056	17	19038	101104661
GO:0051814	movement in other organism involved in symbiotic interaction	biological_process	0.61938	1	1	1056	17	19038	101104661
GO:0019048	modulation by virus of host morphology or physiology	biological_process	0.6196	1	6	1056	116	19038	114115360,114118872,XLOC_069361,101114615,101116769,101117537
GO:0000726	non-recombinational repair	biological_process	0.62103	1	1	1056	17	19038	101121889
GO:0002253	activation of immune response	biological_process	0.62117	1	1	1056	17	19038	101102917
GO:0006401	RNA catabolic process	biological_process	0.62146	1	2	1056	38	19038	1.01105e+17
GO:0044270	cellular nitrogen compound catabolic process	biological_process	0.622	1	6	1056	117	19038	1.01105e+53
GO:0048583	regulation of response to stimulus	biological_process	0.62253	1	14	1056	270	19038	1.01123e+125
GO:0005543	phospholipid binding	molecular_function	0.62447	1	6	1056	118	19038	1.01104e+53
GO:0006007	glucose catabolic process	biological_process	0.62461	1	2	1056	38	19038	443489100216440
GO:0019320	hexose catabolic process	biological_process	0.62461	1	2	1056	38	19038	100216440443489
GO:0006873	cellular ion homeostasis	biological_process	0.6283	1	4	1056	76	19038	1.01105e+35
GO:0006875	cellular metal ion homeostasis	biological_process	0.6283	1	4	1056	76	19038	1.01105e+35
GO:0030003	cellular cation homeostasis	biological_process	0.6283	1	4	1056	76	19038	1.01105e+35
GO:0043038	amino acid activation	biological_process	0.62928	1	4	1056	78	19038	1.01107e+35
GO:0043039	tRNA aminoacylation	biological_process	0.62928	1	4	1056	78	19038	1.01119e+35
GO:0033013	tetrapyrrole metabolic process	biological_process	0.63046	1	6	1056	118	19038	1.01108e+53
GO:0040012	regulation of locomotion	biological_process	0.63058	1	2	1056	38	19038	1.05609e+17
GO:0046148	pigment biosynthetic process	biological_process	0.63068	1	3	1056	59	19038	1.01108e+26
GO:0051262	protein tetramerization	biological_process	0.63071	1	1	1056	18	19038	101115572
GO:0031406	carboxylic acid binding	molecular_function	0.63174	1	1	1056	18	19038	101106741
GO:0048584	positive regulation of response to stimulus	biological_process	0.63212	1	3	1056	58	19038	1.01114e+26
GO:0033644	host cell membrane	cellular_component	0.63251	1	2	1056	39	19038	1.14116e+17
GO:0044218	other organism cell membrane	cellular_component	0.63251	1	2	1056	39	19038	1.14116e+17
GO:0044279	other organism membrane	cellular_component	0.63251	1	2	1056	39	19038	1.01112e+17
GO:0016893	endonuclease activity, active with either ribo- or deoxyribonucleic acids and producing 5'-phosphomonoesters	molecular_function	0.63294	1	5	1056	98	19038	114116607,101115827,XLOC_069361,101117078,101115762
GO:0044257	cellular protein catabolic process	biological_process	0.63302	1	6	1056	117	19038	1.01111e+53
GO:0051603	proteolysis involved in cellular protein catabolic process	biological_process	0.63302	1	6	1056	117	19038	1.01111e+53
GO:0032801	receptor catabolic process	biological_process	0.63313	1	1	1056	18	19038	114116113
GO:0072521	purine-containing compound metabolic process	biological_process	0.63318	1	10	1056	195	19038	1.00302e+89
GO:0070011	peptidase activity, acting on L-amino acid peptides	molecular_function	0.6348	1	49	1056	925	19038	101114683,101112049,101116733,101111721,101102723,101110976,105603085,101121267,101112848,101106381,101105466,105605871,101118205,101120301,101106362,101121519,101121013,101112477,101115671,101110381,101118778,101121761,101115927,101116756,114118738,101114859,101116336,101118866,101104072,101118986,101111322,101107196,114115323,101110127,101104461,101104474,101104849,101104051,101105505,101108642…
GO:0004549	tRNA-specific ribonuclease activity	molecular_function	0.63482	1	1	1056	18	19038	101107041
GO:0004970	ionotropic glutamate receptor activity	molecular_function	0.63483	1	2	1056	39	19038	1.01105e+17
GO:0008066	glutamate receptor activity	molecular_function	0.63483	1	2	1056	39	19038	1.01105e+17
GO:0055076	transition metal ion homeostasis	biological_process	0.63498	1	2	1056	37	19038	1.01106e+17
GO:0042151	nematocyst	cellular_component	0.63583	1	1	1056	18	19038	101121188
GO:0004532	exoribonuclease activity	molecular_function	0.63584	1	1	1056	18	19038	101119719
GO:0016896	exoribonuclease activity, producing 5'-phosphomonoesters	molecular_function	0.63584	1	1	1056	18	19038	101119719
GO:0006959	humoral immune response	biological_process	0.6365	1	1	1056	18	19038	101110078
GO:0042381	hemolymph coagulation	biological_process	0.6365	1	1	1056	18	19038	101110078
GO:0016052	carbohydrate catabolic process	biological_process	0.63662	1	3	1056	59	19038	4.43489e+23
GO:0030111	regulation of Wnt receptor signaling pathway	biological_process	0.63745	1	1	1056	18	19038	114114525
GO:0006213	pyrimidine nucleoside metabolic process	biological_process	0.63865	1	1	1056	18	19038	101102378
GO:0030976	thiamine pyrophosphate binding	molecular_function	0.63899	1	1	1056	18	19038	100145857
GO:0030141	secretory granule	cellular_component	0.63933	1	1	1056	18	19038	443078
GO:0006497	protein lipidation	biological_process	0.63937	1	2	1056	39	19038	1.01115e+17
GO:0006506	GPI anchor biosynthetic process	biological_process	0.63937	1	2	1056	39	19038	1.01115e+17
GO:0006661	phosphatidylinositol biosynthetic process	biological_process	0.63937	1	2	1056	39	19038	1.01118e+17
GO:0071310	cellular response to organic substance	biological_process	0.63979	1	4	1056	80	19038	1.00287e+35
GO:0022884	macromolecule transmembrane transporter activity	molecular_function	0.63982	1	1	1056	18	19038	101111901
GO:0007051	spindle organization	biological_process	0.64094	1	1	1056	18	19038	101110893
GO:0046332	SMAD binding	molecular_function	0.64228	1	1	1056	18	19038	101117633
GO:0033554	cellular response to stress	biological_process	0.64229	1	32	1056	610	19038	101107593,101123079,100527962,101102343,101116988,101121889,101117102,101116317,101121510,443155,101117358,101112872,114109364,101119344,101122097,106991182,101110699,101104887,101123507,101116203,101110809,101115254,114109630,101113358,114110562,101121486,101109971,101110976,101119014,101122615,114117799,105604930
GO:0001871	pattern binding	molecular_function	0.64269	1	2	1056	39	19038	1.01118e+17
GO:0030247	polysaccharide binding	molecular_function	0.64269	1	2	1056	39	19038	1.01111e+17
GO:0016682	oxidoreductase activity, acting on diphenols and related substances as donors, oxygen as acceptor	molecular_function	0.64571	1	2	1056	40	19038	1.0111e+17
GO:0050801	ion homeostasis	biological_process	0.64762	1	4	1056	78	19038	1.01106e+35
GO:0055065	metal ion homeostasis	biological_process	0.64762	1	4	1056	78	19038	1.01106e+35
GO:0055080	cation homeostasis	biological_process	0.64762	1	4	1056	78	19038	1.01105e+35
GO:0034660	ncRNA metabolic process	biological_process	0.65011	1	16	1056	311	19038	1.01121e+143
GO:0006152	purine nucleoside catabolic process	biological_process	0.65035	1	1	1056	19	19038	101122097
GO:0006184	GTP catabolic process	biological_process	0.65035	1	1	1056	19	19038	101122097
GO:0009143	nucleoside triphosphate catabolic process	biological_process	0.65035	1	1	1056	19	19038	101122097
GO:0009146	purine nucleoside triphosphate catabolic process	biological_process	0.65035	1	1	1056	19	19038	101122097
GO:0009154	purine ribonucleotide catabolic process	biological_process	0.65035	1	1	1056	19	19038	101122097
GO:0009203	ribonucleoside triphosphate catabolic process	biological_process	0.65035	1	1	1056	19	19038	101122097
GO:0009207	purine ribonucleoside triphosphate catabolic process	biological_process	0.65035	1	1	1056	19	19038	101122097
GO:0009261	ribonucleotide catabolic process	biological_process	0.65035	1	1	1056	19	19038	101122097
GO:0033124	regulation of GTP catabolic process	biological_process	0.65035	1	1	1056	19	19038	101122097
GO:0043087	regulation of GTPase activity	biological_process	0.65035	1	1	1056	19	19038	101122097
GO:0046130	purine ribonucleoside catabolic process	biological_process	0.65035	1	1	1056	19	19038	101122097
GO:1901069	guanosine-containing compound catabolic process	biological_process	0.65035	1	1	1056	19	19038	101122097
GO:0000904	cell morphogenesis involved in differentiation	biological_process	0.65038	1	2	1056	40	19038	1.01103e+17
GO:0004629	phospholipase C activity	molecular_function	0.65056	1	1	1056	19	19038	105612589
GO:0006858	extracellular transport	biological_process	0.65093	1	1	1056	18	19038	101116769
GO:0004402	histone acetyltransferase activity	molecular_function	0.65519	1	1	1056	19	19038	101110423
GO:0005544	calcium-dependent phospholipid binding	molecular_function	0.65532	1	1	1056	19	19038	101102449
GO:0016209	antioxidant activity	molecular_function	0.65595	1	3	1056	60	19038	1.01103e+26
GO:0044462	external encapsulating structure part	cellular_component	0.65703	1	1	1056	19	19038	497271
GO:0006073	cellular glucan metabolic process	biological_process	0.65792	1	1	1056	19	19038	101113336
GO:0044042	glucan metabolic process	biological_process	0.65792	1	1	1056	19	19038	101113336
GO:0006468	protein phosphorylation	biological_process	0.65812	1	32	1056	622	19038	101110124,101122459,114118052,101122739,100217411,114109630,101122928,101118350,101103084,101118410,101108969,101120630,101105574,105605648,101122306,101115680,101111066,101111281,101122744,101110351,101120826,101118334,101115883,101108760,101102131,101117900,100194428,101105713,100302103,101102973,101122455,101123008
GO:0071941	nitrogen cycle metabolic process	biological_process	0.65873	1	1	1056	19	19038	101118054
GO:0005217	intracellular ligand-gated ion channel activity	molecular_function	0.65909	1	2	1056	40	19038	1.01105e+17
GO:0005218	intracellular ligand-gated calcium channel activity	molecular_function	0.65909	1	2	1056	40	19038	1.01111e+17
GO:0005219	ryanodine-sensitive calcium-release channel activity	molecular_function	0.65909	1	2	1056	40	19038	1.01105e+17
GO:0015278	calcium-release channel activity	molecular_function	0.65909	1	2	1056	40	19038	1.01105e+17
GO:0006281	DNA repair	biological_process	0.66	1	26	1056	504	19038	105604930,114117799,101122097,101119014,101121486,101119344,114110562,101113358,101112872,443155,101117358,101115254,101121510,101117102,101116203,101116317,101121889,101116988,101123507,101104887,101102343,101110699,100527962,101123079,106991182,101107593
GO:0019725	cellular homeostasis	biological_process	0.66032	1	8	1056	158	19038	1.01119e+71
GO:0050830	defense response to Gram-positive bacterium	biological_process	0.66036	1	1	1056	19	19038	101117183
GO:0043648	dicarboxylic acid metabolic process	biological_process	0.66061	1	1	1056	19	19038	101104144
GO:0046677	response to antibiotic	biological_process	0.66085	1	1	1056	19	19038	101118128
GO:0012505	endomembrane system	cellular_component	0.66087	1	16	1056	315	19038	1.01106e+143
GO:0044265	cellular macromolecule catabolic process	biological_process	0.66137	1	8	1056	160	19038	1.0112e+71
GO:0010883	regulation of lipid storage	biological_process	0.66192	1	1	1056	19	19038	101104395
GO:0010884	positive regulation of lipid storage	biological_process	0.66192	1	1	1056	19	19038	101104395
GO:0005834	heterotrimeric G-protein complex	cellular_component	0.66375	1	1	1056	19	19038	101114097
GO:0009898	internal side of plasma membrane	cellular_component	0.66375	1	1	1056	19	19038	101114097
GO:0019897	extrinsic to plasma membrane	cellular_component	0.66375	1	1	1056	19	19038	101114097
GO:0031234	extrinsic to internal side of plasma membrane	cellular_component	0.66375	1	1	1056	19	19038	101114097
GO:0002682	regulation of immune system process	biological_process	0.66387	1	2	1056	40	19038	1.01103e+17
GO:0046365	monosaccharide catabolic process	biological_process	0.66604	1	2	1056	41	19038	100216440443489
GO:0005184	neuropeptide hormone activity	molecular_function	0.66622	1	2	1056	41	19038	1.2182e+17
GO:0016787	hydrolase activity	molecular_function	0.66629	1	176	1056	3290	19038	100302103,101118240,443184,101106415,101117763,101106047,100820744,101103840,101109224,101110723,101117081,101115762,101117900,101110127,101107196,114115323,105612589,101106209,101108295,101105466,101112848,101121504,101117497,114116607,101112477,780511,100145877,101111069,101113744,101113504,101107395,101120534,101122928,105616742,101102343,101108642,101113174,101102259,101116317,101106243,10699…
GO:0043066	negative regulation of apoptotic process	biological_process	0.66659	1	2	1056	41	19038	1.01109e+17
GO:0043069	negative regulation of programmed cell death	biological_process	0.66659	1	2	1056	41	19038	1.01109e+17
GO:0060548	negative regulation of cell death	biological_process	0.66659	1	2	1056	41	19038	1.01114e+17
GO:0050793	regulation of developmental process	biological_process	0.66743	1	3	1056	62	19038	1.01114e+26
GO:0034470	ncRNA processing	biological_process	0.66816	1	12	1056	238	19038	1.01113e+107
GO:0046915	transition metal ion transmembrane transporter activity	molecular_function	0.66839	1	7	1056	141	19038	1.14115e+62
GO:0009653	anatomical structure morphogenesis	biological_process	0.66895	1	11	1056	220	19038	1.01114e+92
GO:0008643	carbohydrate transport	biological_process	0.66939	1	3	1056	62	19038	101110976,XLOC_125215,101102366
GO:0005234	extracellular-glutamate-gated ion channel activity	molecular_function	0.67097	1	1	1056	20	19038	101117078
GO:0007339	binding of sperm to zona pellucida	biological_process	0.67189	1	1	1056	20	19038	114108678
GO:0008037	cell recognition	biological_process	0.67189	1	1	1056	20	19038	114108678
GO:0009988	cell-cell recognition	biological_process	0.67189	1	1	1056	20	19038	114108678
GO:0035036	sperm-egg recognition	biological_process	0.67189	1	1	1056	20	19038	114108678
GO:0006874	cellular calcium ion homeostasis	biological_process	0.67191	1	2	1056	41	19038	1.01111e+17
GO:0055074	calcium ion homeostasis	biological_process	0.67191	1	2	1056	41	19038	1.01111e+17
GO:0072503	cellular divalent inorganic cation homeostasis	biological_process	0.67191	1	2	1056	41	19038	1.01105e+17
GO:0072507	divalent inorganic cation homeostasis	biological_process	0.67191	1	2	1056	41	19038	1.01105e+17
GO:0033692	cellular polysaccharide biosynthetic process	biological_process	0.67254	1	1	1056	20	19038	105608906
GO:0061024	membrane organization	biological_process	0.67274	1	7	1056	143	19038	1.05603e+59
GO:0001518	voltage-gated sodium channel complex	cellular_component	0.67316	1	1	1056	20	19038	101113744
GO:0005248	voltage-gated sodium channel activity	molecular_function	0.67316	1	1	1056	20	19038	101113744
GO:0034706	sodium channel complex	cellular_component	0.67316	1	1	1056	20	19038	101113744
GO:0005798	Golgi-associated vesicle	cellular_component	0.67325	1	1	1056	20	19038	101118583
GO:0030660	Golgi-associated vesicle membrane	cellular_component	0.67325	1	1	1056	20	19038	101118583
GO:0006352	DNA-dependent transcription, initiation	biological_process	0.6749	1	9	1056	178	19038	1.14112e+80
GO:0005665	DNA-directed RNA polymerase II, core complex	cellular_component	0.67597	1	1	1056	20	19038	101114511
GO:0006094	gluconeogenesis	biological_process	0.67627	1	1	1056	20	19038	101106243
GO:0019319	hexose biosynthetic process	biological_process	0.67627	1	1	1056	20	19038	101106243
GO:0046364	monosaccharide biosynthetic process	biological_process	0.67627	1	1	1056	20	19038	101106243
GO:1901361	organic cyclic compound catabolic process	biological_process	0.67719	1	6	1056	124	19038	1.01116e+53
GO:0007267	cell-cell signaling	biological_process	0.6772	1	1	1056	20	19038	101111396
GO:0016788	hydrolase activity, acting on ester bonds	molecular_function	0.67746	1	47	1056	908	19038	101113174,101105505,101106160,101106415,101116988,101106243,101115827,101121962,101117081,105601857,101115927,101115762,101117078,101122744,XLOC_069361,101111654,101110796,105612589,101122097,101117900,105616092,101104474,101119719,114108678,101123514,101102917,101105466,101107041,101106237,101117497,101116203,101106890,101111593,114116607,101105406,101102342,101114996,101115506,101106681,1011117…
GO:0031490	chromatin DNA binding	molecular_function	0.67833	1	1	1056	19	19038	105615356
GO:0031492	nucleosomal DNA binding	molecular_function	0.67833	1	1	1056	19	19038	105615356
GO:1901505	carbohydrate derivative transporter activity	molecular_function	0.67872	1	1	1056	20	19038	101115095
GO:0030163	protein catabolic process	biological_process	0.67943	1	6	1056	123	19038	1.01102e+53
GO:0046474	glycerophospholipid biosynthetic process	biological_process	0.67945	1	2	1056	42	19038	1.01118e+17
GO:0030042	actin filament depolymerization	biological_process	0.68074	1	1	1056	20	19038	101110976
GO:0030834	regulation of actin filament depolymerization	biological_process	0.68074	1	1	1056	20	19038	101110976
GO:0030835	negative regulation of actin filament depolymerization	biological_process	0.68074	1	1	1056	20	19038	101110976
GO:0030837	negative regulation of actin filament polymerization	biological_process	0.68074	1	1	1056	20	19038	101110976
GO:0031333	negative regulation of protein complex assembly	biological_process	0.68074	1	1	1056	20	19038	101110976
GO:0032272	negative regulation of protein polymerization	biological_process	0.68074	1	1	1056	20	19038	101110976
GO:0043242	negative regulation of protein complex disassembly	biological_process	0.68074	1	1	1056	20	19038	101110976
GO:0051261	protein depolymerization	biological_process	0.68074	1	1	1056	20	19038	101110976
GO:0051494	negative regulation of cytoskeleton organization	biological_process	0.68074	1	1	1056	20	19038	101110976
GO:0051693	actin filament capping	biological_process	0.68074	1	1	1056	20	19038	101110976
GO:1901879	regulation of protein depolymerization	biological_process	0.68074	1	1	1056	20	19038	101110976
GO:1901880	negative regulation of protein depolymerization	biological_process	0.68074	1	1	1056	20	19038	101110976
GO:0016070	RNA metabolic process	biological_process	0.68277	1	163	1056	3047	19038	101112041,XLOC_091011,494440,101123079,101119938,101107593,101121962,101115827,101116988,101105117,101120286,101108241,101119818,101104783,101112872,101111046,105601907,114112829,121819509,114112844,121817953,101107041,101122496,101106890,101115254,101121955,101117906,101112525,101118128,101118426,114113008,101117336,100169939,101122255,101120682,101123658,101104660,114117799,101108604,101118811,…
GO:0005096	GTPase activator activity	molecular_function	0.68337	1	4	1056	84	19038	1.01121e+35
GO:0009163	nucleoside biosynthetic process	biological_process	0.68384	1	6	1056	124	19038	1.01115e+53
GO:0042455	ribonucleoside biosynthetic process	biological_process	0.68384	1	6	1056	124	19038	1.01118e+53
GO:1901659	glycosyl compound biosynthetic process	biological_process	0.68384	1	6	1056	124	19038	1.01118e+53
GO:0051649	establishment of localization in cell	biological_process	0.68455	1	42	1056	813	19038	114115360,100359412,105616092,101110591,101107318,114112844,101109364,101110723,101114679,101111654,101102047,101115883,101115974,101121962,101101929,101111508,101117600,101120350,101103792,101105547,101123169,101106160,101107055,114117822,101114615,101110893,101122615,101118296,101122054,101101940,101118583,101108027,101101892,101112734,101119870,101113504,101115680,101120572,101116769,101106631…
GO:0048468	cell development	biological_process	0.68735	1	6	1056	125	19038	1.01103e+47
GO:0044455	mitochondrial membrane part	cellular_component	0.68759	1	6	1056	124	19038	1.00302e+53
GO:0034357	photosynthetic membrane	cellular_component	0.68864	1	6	1056	125	19038	1.01121e+53
GO:0000922	spindle pole	cellular_component	0.69058	1	1	1056	21	19038	101118866
GO:0043130	ubiquitin binding	molecular_function	0.69089	1	1	1056	21	19038	101103774
GO:0051094	positive regulation of developmental process	biological_process	0.6909	1	1	1056	21	19038	101114341
GO:0006486	protein glycosylation	biological_process	0.69103	1	5	1056	105	19038	1.00038e+44
GO:0043413	macromolecule glycosylation	biological_process	0.69103	1	5	1056	105	19038	1.00038e+44
GO:0042626	ATPase activity, coupled to transmembrane movement of substances	molecular_function	0.69103	1	5	1056	105	19038	1.01115e+44
GO:0043492	ATPase activity, coupled to movement of substances	molecular_function	0.69103	1	5	1056	105	19038	1.01122e+44
GO:0007599	hemostasis	biological_process	0.69146	1	7	1056	144	19038	1.0111e+62
GO:0050817	coagulation	biological_process	0.69146	1	7	1056	144	19038	1.0111e+62
GO:0050878	regulation of body fluid levels	biological_process	0.69146	1	7	1056	144	19038	1.01103e+62
GO:0043112	receptor metabolic process	biological_process	0.69207	1	1	1056	21	19038	114116113
GO:0070566	adenylyltransferase activity	molecular_function	0.69252	1	1	1056	21	19038	101122928
GO:0016226	iron-sulfur cluster assembly	biological_process	0.69268	1	1	1056	21	19038	443533
GO:0031163	metallo-sulfur cluster assembly	biological_process	0.69268	1	1	1056	21	19038	443533
GO:0032507	maintenance of protein location in cell	biological_process	0.69282	1	3	1056	65	19038	1.01115e+26
GO:0045185	maintenance of protein location	biological_process	0.69282	1	3	1056	65	19038	1.01115e+26
GO:0051235	maintenance of location	biological_process	0.69282	1	3	1056	65	19038	1.0112e+26
GO:0051651	maintenance of location in cell	biological_process	0.69282	1	3	1056	65	19038	1.01115e+26
GO:0051260	protein homooligomerization	biological_process	0.6939	1	3	1056	64	19038	1.01119e+26
GO:0042393	histone binding	molecular_function	0.69499	1	1	1056	21	19038	101102059
GO:0009308	amine metabolic process	biological_process	0.69514	1	4	1056	85	19038	1.01104e+35
GO:0050660	flavin adenine dinucleotide binding	molecular_function	0.69517	1	4	1056	86	19038	1.01123e+35
GO:0044780	bacterial-type flagellum assembly	biological_process	0.69537	1	1	1056	21	19038	101119818
GO:0060255	regulation of macromolecule metabolic process	biological_process	0.69565	1	117	1056	2210	19038	101112975,101121441,101121510,101111979,101117613,101111927,101103311,101104144,101115026,101110423,101118811,101120348,101103792,101103105,101102973,443519,101104051,101117020,101122097,114110261,101107815,114118046,101107196,101105321,101111888,101109364,100302349,101119408,101107860,443155,101121174,101119854,101116889,101123507,101114012,101109765,101107089,101109695,101103140,101117537,10699…
GO:0048731	system development	biological_process	0.69638	1	6	1056	125	19038	1.01103e+53
GO:0036094	small molecule binding	molecular_function	0.69719	1	116	1056	2208	19038	101106047,101101929,101104144,105608622,101103411,101119597,101111268,100302103,101122570,101119116,101106640,101106209,101105713,101121697,101109364,101117900,101104441,101108760,101120875,101115883,101106317,101120826,101122744,101119091,101105791,101115680,101122306,101123507,101115534,101117246,101115188,101119042,101108969,100135438,100145857,101101877,101107395,101118054,101122928,101104979…
GO:0042592	homeostatic process	biological_process	0.69858	1	9	1056	184	19038	1.01105e+80
GO:0008855	exodeoxyribonuclease VII activity	molecular_function	0.69923	1	5	1056	106	19038	1.01112e+44
GO:0009521	photosystem	cellular_component	0.69955	1	5	1056	106	19038	1.21818e+44
GO:0016032	viral process	biological_process	0.69963	1	32	1056	627	19038	101117020,101105693,114118046,114115360,101102351,XLOC_069361,101121093,114116113,443489,443227,101114518,101110976,101111396,106991171,105616742,114118047,101114773,101114615,101104535,443413,101108006,101104661,101122306,101116769,114118872,114116607,101115254,114108616,101109765,101117537,106991182,101119042
GO:0008509	anion transmembrane transporter activity	molecular_function	0.70078	1	7	1056	147	19038	1.01111e+59
GO:0005976	polysaccharide metabolic process	biological_process	0.70301	1	2	1056	44	19038	1.01113e+17
GO:0045017	glycerolipid biosynthetic process	biological_process	0.70467	1	2	1056	44	19038	1.01115e+17
GO:0032182	small conjugating protein binding	molecular_function	0.70575	1	2	1056	44	19038	780452101103774
GO:0044003	modification by symbiont of host morphology or physiology	biological_process	0.70611	1	6	1056	127	19038	114115360,101114615,XLOC_069361,114118872,101117537,101116769
GO:0009307	DNA restriction-modification system	biological_process	0.70629	1	1	1056	22	19038	101106415
GO:0044355	clearance of foreign intracellular DNA	biological_process	0.70629	1	1	1056	22	19038	101106415
GO:0007596	blood coagulation	biological_process	0.70637	1	6	1056	126	19038	1.01106e+53
GO:0004497	monooxygenase activity	molecular_function	0.70714	1	3	1056	66	19038	1.01104e+20
GO:0070085	glycosylation	biological_process	0.70724	1	5	1056	107	19038	1.00038e+44
GO:0003777	microtubule motor activity	molecular_function	0.70725	1	3	1056	67	19038	1.01102e+26
GO:0003724	RNA helicase activity	molecular_function	0.70748	1	4	1056	87	19038	1.01123e+35
GO:0030030	cell projection organization	biological_process	0.70821	1	4	1056	87	19038	1.01114e+35
GO:0016301	kinase activity	molecular_function	0.70849	1	57	1056	1108	19038	101102131,101117900,101105713,100194428,101122194,101111066,101111281,101110351,101122744,101114679,121816444,101107157,101117358,101108760,101120826,101112872,101115883,101121441,101123008,101121188,101121510,443489,114114866,101109811,101104167,100302103,101119014,114117799,101122928,100216440,101118350,101113358,101122459,101104661,101110124,100217411,114118052,101122739,101123658,105605648,10…
GO:0009271	phage shock	biological_process	0.70944	1	1	1056	22	19038	101105321
GO:0071554	cell wall organization or biogenesis	biological_process	0.7096	1	1	1056	22	19038	101110286
GO:0000794	condensed nuclear chromosome	cellular_component	0.71045	1	4	1056	87	19038	4.43155e+32
GO:0004659	prenyltransferase activity	molecular_function	0.71124	1	1	1056	22	19038	101111964
GO:0006664	glycolipid metabolic process	biological_process	0.71134	1	3	1056	66	19038	1.01118e+26
GO:0048856	anatomical structure development	biological_process	0.71194	1	16	1056	324	19038	1.01105e+137
GO:0051704	multi-organism process	biological_process	0.71231	1	67	1056	1290	19038	443413,105616742,101109765,106991182,101115572,101117537,101119042,101122306,101107943,101116769,114118872,101110381,114116607,101104072,101119091,101105321,101109364,101105693,101117020,101122097,114118046,100192427,101115969,101105151,101103983,101117183,101106428,101112070,101117600,114116113,101108006,492300,101104661,101111721,101110976,106991171,101111396,114118047,101114615,101114773,10110…
GO:0008233	peptidase activity	molecular_function	0.71257	1	51	1056	990	19038	101117763,443184,101103840,101116988,780452,101122213,106990118,101101924,101104051,101105505,101120751,101108642,114115323,101107196,101111322,101104849,101104474,101104461,101110127,101114859,114118738,101115927,101116756,101104072,101118986,101110723,101118866,101116336,101115671,101112477,101118128,101121013,101121761,101118778,101110381,101106381,101112848,101121519,101106362,105605871,10111…
GO:0044723	single-organism carbohydrate metabolic process	biological_process	0.71274	1	15	1056	306	19038	1.00038e+128
GO:0051817	modification of morphology or physiology of other organism involved in symbiotic interaction	biological_process	0.7132	1	6	1056	128	19038	114115360,101114615,XLOC_069361,114118872,101116769,101117537
GO:0006811	ion transport	biological_process	0.71336	1	60	1056	1163	19038	101113595,101119854,101119372,101120989,101106745,101113020,101105791,101105466,101111082,101108027,101118054,101114773,101107395,101114615,101114155,101119460,101123578,101108165,101113504,101107980,101112188,101111069,101113744,101115095,101115005,101102032,101120940,101110267,101103311,101111508,101105216,101104978,101112012,101106047,101123332,114114866,101121071,101120348,101103792,101113095…
GO:0005783	endoplasmic reticulum	cellular_component	0.71355	1	13	1056	267	19038	1.01118e+116
GO:0006518	peptide metabolic process	biological_process	0.71378	1	2	1056	45	19038	1.01111e+17
GO:0045995	regulation of embryonic development	biological_process	0.71416	1	1	1056	22	19038	105608906
GO:0006464	cellular protein modification process	biological_process	0.71422	1	72	1056	1390	19038	101122455,101110286,101123008,101118334,101110394,101117358,121816444,101111654,101111066,101111281,101110351,101117440,100194428,101123336,101111638,101102131,101105574,105610305,101103084,101118410,101104887,101120630,101102917,101115676,100302360,105605648,100037660,114118052,101114703,100217411,101110124,101107011,101106373,101103203,101118350,101106425,101119014,114117799,101102973,100302103…
GO:0036211	protein modification process	biological_process	0.71422	1	72	1056	1390	19038	101110124,101107011,114118052,101114703,100217411,101118350,101103203,114117799,101119014,101106425,101106373,101120630,101104887,101118410,101103084,101102917,105610305,101105574,105605648,100037660,100302360,101115676,101111654,121816444,101110351,101117440,101111066,101111281,101118334,101110394,101117358,101111638,101102131,101123336,100194428,101122455,101110286,101123008,101122459,101113504…
GO:0000975	regulatory region DNA binding	molecular_function	0.71457	1	1	1056	22	19038	101107196
GO:0001067	regulatory region nucleic acid binding	molecular_function	0.71457	1	1	1056	22	19038	101107196
GO:0001816	cytokine production	biological_process	0.71473	1	1	1056	22	19038	101104395
GO:0001817	regulation of cytokine production	biological_process	0.71473	1	1	1056	22	19038	101104395
GO:0001819	positive regulation of cytokine production	biological_process	0.71473	1	1	1056	22	19038	101104395
GO:0010468	regulation of gene expression	biological_process	0.71556	1	113	1056	2147	19038	101122496,105610305,101107348,101110699,101118128,101118148,101118426,101118218,101102976,101114648,101115254,114108616,101110302,101123658,100169939,101113358,101117336,101114267,101110976,114118047,114117799,101108604,101119014,101105239,100171394,101107593,101119938,101123244,101123079,101114631,101114518,494440,100527962,101112041,XLOC_091011,101121093,101108399,114114866,101116988,101121188,…
GO:0019915	lipid storage	biological_process	0.71638	1	1	1056	22	19038	101104395
GO:0015093	ferrous iron transmembrane transporter activity	molecular_function	0.71734	1	4	1056	87	19038	1.01113e+35
GO:0015684	ferrous iron transport	biological_process	0.71734	1	4	1056	87	19038	1.01107e+35
GO:0032786	positive regulation of DNA-dependent transcription, elongation	biological_process	0.7175	1	1	1056	22	19038	101104783
GO:0032968	positive regulation of transcription elongation from RNA polymerase II promoter	biological_process	0.7175	1	1	1056	22	19038	101104783
GO:0034243	regulation of transcription elongation from RNA polymerase II promoter	biological_process	0.7175	1	1	1056	22	19038	101104783
GO:2001141	regulation of RNA biosynthetic process	biological_process	0.71794	1	110	1056	2093	19038	101112041,XLOC_091011,101114518,494440,100527962,101123079,100171394,101107593,101119938,101123244,101121188,101115946,101116988,101108399,101121093,114114866,101103071,101120428,101120286,114113264,101108241,101104783,101119818,101102047,101112872,101117358,100359412,101111046,114115360,105601907,114112844,121817953,101113034,101110699,105610305,101107348,101122496,101114648,101115254,114108616,…
GO:0016757	transferase activity, transferring glycosyl groups	molecular_function	0.71815	1	17	1056	346	19038	1.05609e+149
GO:0016796	exonuclease activity, active with either ribo- or deoxyribonucleic acids and producing 5'-phosphomonoesters	molecular_function	0.71832	1	6	1056	129	19038	1.01106e+53
GO:0016579	protein deubiquitination	biological_process	0.7184	1	3	1056	67	19038	1.01117e+26
GO:0070646	protein modification by small protein removal	biological_process	0.7184	1	3	1056	67	19038	1.01114e+26
GO:0002684	positive regulation of immune system process	biological_process	0.71875	1	1	1056	22	19038	101102917
GO:0050778	positive regulation of immune response	biological_process	0.71875	1	1	1056	22	19038	101102917
GO:0051252	regulation of RNA metabolic process	biological_process	0.71976	1	110	1056	2094	19038	114118046,101107815,114110261,101122097,101117020,101109364,101111888,101105321,101107196,101119408,100302349,101121174,101107860,101121510,101121441,101112975,101111927,101103311,101104144,101117613,101111979,101103792,101120348,101118811,101115026,101110423,443519,101104051,101103105,100286739,105604930,114118686,105603087,101121321,105606599,443469,101104912,101110078,101110634,101112188,10111…
GO:0006644	phospholipid metabolic process	biological_process	0.72141	1	6	1056	130	19038	1.01118e+53
GO:0046907	intracellular transport	biological_process	0.72229	1	36	1056	712	19038	101101892,101114615,101110893,101122615,101118296,101101940,101118583,101108027,101113504,101115680,101120572,101116769,101106631,101101879,101104887,101110591,101109364,101107318,114112844,100359412,101102047,101115883,101110723,101114679,101111654,101101929,101111508,101117600,101115974,101121962,101123169,101107055,101106160,114117822,101120350,101103792
GO:0008047	enzyme activator activity	molecular_function	0.72248	1	5	1056	109	19038	1.01112e+44
GO:0009064	glutamine family amino acid metabolic process	biological_process	0.72442	1	1	1056	23	19038	101104144
GO:0034655	nucleobase-containing compound catabolic process	biological_process	0.72522	1	4	1056	89	19038	1.01105e+35
GO:0000075	cell cycle checkpoint	biological_process	0.72543	1	2	1056	45	19038	101108076443155
GO:0045786	negative regulation of cell cycle	biological_process	0.72552	1	2	1056	45	19038	1.01113e+17
GO:0030337	DNA polymerase processivity factor activity	molecular_function	0.72591	1	1	1056	23	19038	101117020
GO:0006575	cellular modified amino acid metabolic process	biological_process	0.72614	1	3	1056	68	19038	1.01116e+26
GO:0009452	7-methylguanosine RNA capping	biological_process	0.72714	1	1	1056	23	19038	101116202
GO:0036260	RNA capping	biological_process	0.72714	1	1	1056	23	19038	101116202
GO:0006614	SRP-dependent cotranslational protein targeting to membrane	biological_process	0.72725	1	2	1056	46	19038	1.01109e+17
GO:0045047	protein targeting to ER	biological_process	0.72725	1	2	1056	46	19038	1.01105e+17
GO:0072599	establishment of protein localization to endoplasmic reticulum	biological_process	0.72725	1	2	1056	46	19038	1.01109e+17
GO:0031491	nucleosome binding	molecular_function	0.72728	1	1	1056	22	19038	105615356
GO:0009401	phosphoenolpyruvate-dependent sugar phosphotransferase system	biological_process	0.72781	1	1	1056	23	19038	101110976
GO:0016853	isomerase activity	molecular_function	0.72787	1	10	1056	211	19038	1.01122e+86
GO:0009066	aspartate family amino acid metabolic process	biological_process	0.72796	1	1	1056	23	19038	114108841
GO:0008053	mitochondrial fusion	biological_process	0.72814	1	1	1056	23	19038	105608906
GO:0051186	cofactor metabolic process	biological_process	0.72925	1	8	1056	172	19038	1.01119e+71
GO:0005753	mitochondrial proton-transporting ATP synthase complex	cellular_component	0.72935	1	2	1056	46	19038	1.01121e+17
GO:0016798	hydrolase activity, acting on glycosyl bonds	molecular_function	0.72994	1	11	1056	232	19038	1.01116e+98
GO:0006508	proteolysis	biological_process	0.73085	1	37	1056	731	19038	101115927,101116756,101119408,101116336,114115323,101111322,101104849,101104474,101104461,101110127,101105505,101120751,101108642,443184,101123429,101103840,101116988,101107820,101122213,101110286,105616454,101102723,101116733,101112049,101101892,101121267,105603085,101112848,101121519,101118205,105605871,101120301,101115671,101112477,101121013,101121761,101110809
GO:0016298	lipase activity	molecular_function	0.73089	1	2	1056	47	19038	1.01106e+17
GO:0006399	tRNA metabolic process	biological_process	0.73096	1	11	1056	231	19038	1.01119e+98
GO:0044087	regulation of cellular component biogenesis	biological_process	0.73122	1	2	1056	46	19038	1.0112e+17
GO:0051920	peroxiredoxin activity	molecular_function	0.73214	1	1	1056	23	19038	101106703
GO:0014070	response to organic cyclic compound	biological_process	0.7325	1	3	1056	69	19038	1.01119e+26
GO:0016929	SUMO-specific protease activity	molecular_function	0.73307	1	1	1056	23	19038	780452
GO:0032183	SUMO binding	molecular_function	0.73307	1	1	1056	23	19038	780452
GO:0070122	isopeptidase activity	molecular_function	0.73307	1	1	1056	23	19038	780452
GO:0070138	small conjugating protein-specific isopeptidase activity	molecular_function	0.73307	1	1	1056	23	19038	780452
GO:0070140	SUMO-specific isopeptidase activity	molecular_function	0.73307	1	1	1056	23	19038	780452
GO:0004601	peroxidase activity	molecular_function	0.73348	1	1	1056	23	19038	101121229
GO:0016684	oxidoreductase activity, acting on peroxide as acceptor	molecular_function	0.73348	1	1	1056	23	19038	101121229
GO:0034062	RNA polymerase activity	molecular_function	0.73479	1	13	1056	271	19038	1.01122e+116
GO:0015399	primary active transmembrane transporter activity	molecular_function	0.73624	1	5	1056	111	19038	1.01115e+44
GO:0015405	P-P-bond-hydrolysis-driven transmembrane transporter activity	molecular_function	0.73624	1	5	1056	111	19038	1.01111e+44
GO:0000041	transition metal ion transport	biological_process	0.73666	1	7	1056	151	19038	1.0112e+62
GO:0004529	exodeoxyribonuclease activity	molecular_function	0.73707	1	5	1056	111	19038	1.01112e+44
GO:0016895	exodeoxyribonuclease activity, producing 5'-phosphomonoesters	molecular_function	0.73707	1	5	1056	111	19038	1.01112e+44
GO:0003995	acyl-CoA dehydrogenase activity	molecular_function	0.73846	1	1	1056	24	19038	101117509
GO:0006650	glycerophospholipid metabolic process	biological_process	0.7385	1	4	1056	91	19038	1.01106e+35
GO:0044550	secondary metabolite biosynthetic process	biological_process	0.73945	1	1	1056	24	19038	101107672
GO:0045263	proton-transporting ATP synthase complex, coupling factor F(o)	cellular_component	0.73948	1	2	1056	47	19038	1.01123e+17
GO:0000166	nucleotide binding	molecular_function	0.73949	1	113	1056	2175	19038	101113085,101113744,101122739,101114124,101122459,443533,100145877,100135438,101101877,101107395,101118054,101122928,101104979,101117246,101115188,101119042,101108969,101105791,101115680,101122306,101123507,101115534,101104441,101108760,101120875,101115883,101106317,101120826,101122744,101119091,101105713,101106640,101106209,101121697,101109364,101117900,101111268,100302103,101122570,101119116,10…
GO:1901265	nucleoside phosphate binding	molecular_function	0.73949	1	113	1056	2175	19038	101119460,101114267,101106760,101118350,443078,101114773,101110893,101104745,101111683,114118052,101104730,100217411,101110124,101121740,101115278,100302303,101123365,101118148,101120572,101113020,101119865,101107720,101110770,101106890,101115254,101114648,114108616,105605648,101113346,100302084,101105574,101107888,101122496,101104887,101120630,101107641,101103084,101118410,101103752,101118398,10…
GO:0016849	phosphorus-oxygen lyase activity	molecular_function	0.73957	1	2	1056	48	19038	1.01106e+17
GO:0042651	thylakoid membrane	cellular_component	0.73959	1	1	1056	24	19038	101118167
GO:0030313	cell envelope	cellular_component	0.74005	1	1	1056	24	19038	497271
GO:0009057	macromolecule catabolic process	biological_process	0.7404	1	10	1056	213	19038	1.01123e+89
GO:0019076	viral release from host cell	biological_process	0.74055	1	1	1056	24	19038	114116113
GO:0044781	bacterial-type flagellum organization	biological_process	0.74192	1	1	1056	24	19038	101119818
GO:0071806	protein transmembrane transport	biological_process	0.74217	1	1	1056	24	19038	101122054
GO:0015293	symporter activity	molecular_function	0.74219	1	2	1056	48	19038	1.01116e+17
GO:0015294	solute:cation symporter activity	molecular_function	0.74219	1	2	1056	48	19038	1.01121e+17
GO:0035091	phosphatidylinositol binding	molecular_function	0.74248	1	3	1056	70	19038	1.01104e+26
GO:0007631	feeding behavior	biological_process	0.74354	1	1	1056	24	19038	114109630
GO:0022890	inorganic cation transmembrane transporter activity	molecular_function	0.74355	1	38	1056	756	19038	101113020,101105791,101113595,101120989,101119372,101116078,101114155,101110976,101107395,101107980,101115095,101113744,101123578,101120042,101108165,101111508,101104978,114114866,101121071,101123332,101103774,101115005,101104643,101102032,101111268,101112385,101120935,101103792,101113095,101123528,101117892,101108864,121817553,100359412,101121174,101120875,100302624,101120286
GO:0042030	ATPase inhibitor activity	molecular_function	0.74474	1	1	1056	24	19038	101105216
GO:0048610	cellular process involved in reproduction	biological_process	0.74479	1	14	1056	293	19038	1.14109e+116
GO:0006355	regulation of transcription, DNA-dependent	biological_process	0.74653	1	109	1056	2090	19038	101118218,101118426,101118148,101118128,114108616,101114648,101102976,101107348,105610305,101122496,101110699,114118047,101110976,101114267,101105239,101108604,101119014,114117799,101123658,101110302,101117336,101113358,100169939,101116988,114114866,101108399,101121093,101115946,101121188,101123079,101123244,101119938,101107593,100171394,XLOC_091011,101112041,494440,100527962,101114518,114112844,…
GO:1901988	negative regulation of cell cycle phase transition	biological_process	0.74803	1	2	1056	47	19038	101108076443155
GO:0070851	growth factor receptor binding	molecular_function	0.74805	1	1	1056	24	19038	101122496
GO:0030414	peptidase inhibitor activity	molecular_function	0.74875	1	8	1056	173	19038	1.01121e+71
GO:0061134	peptidase regulator activity	molecular_function	0.74875	1	8	1056	173	19038	1.01114e+71
GO:0009101	glycoprotein biosynthetic process	biological_process	0.74989	1	5	1056	113	19038	1.00038e+44
GO:0003887	DNA-directed DNA polymerase activity	molecular_function	0.7506	1	4	1056	92	19038	1.01105e+35
GO:0016568	chromatin modification	biological_process	0.7518	1	3	1056	71	19038	1.01115e+26
GO:0007018	microtubule-based movement	biological_process	0.75233	1	3	1056	72	19038	1.01108e+26
GO:1901137	carbohydrate derivative biosynthetic process	biological_process	0.75357	1	17	1056	355	19038	1.0112e+152
GO:0016667	oxidoreductase activity, acting on a sulfur group of donors	molecular_function	0.75408	1	7	1056	155	19038	1.14118e+62
GO:0046486	glycerolipid metabolic process	biological_process	0.75427	1	4	1056	93	19038	1.01118e+35
GO:0045087	innate immune response	biological_process	0.75481	1	1	1056	25	19038	101110078
GO:0019064	viral entry into host cell via membrane fusion with the plasma membrane	biological_process	0.75495	1	1	1056	25	19038	443227
GO:0030474	spindle pole body duplication	biological_process	0.75528	1	1	1056	25	19038	101121484
GO:0051300	spindle pole body organization	biological_process	0.75528	1	1	1056	25	19038	101121484
GO:0015994	chlorophyll metabolic process	biological_process	0.75591	1	1	1056	25	19038	101115927
GO:0010562	positive regulation of phosphorus metabolic process	biological_process	0.75634	1	1	1056	25	19038	114109630
GO:0031401	positive regulation of protein modification process	biological_process	0.75634	1	1	1056	25	19038	114109630
GO:0045937	positive regulation of phosphate metabolic process	biological_process	0.75634	1	1	1056	25	19038	114109630
GO:0019028	viral capsid	cellular_component	0.75717	1	22	1056	452	19038	114116607,101110381,101117600,101121093,105601981,101103983,101121383,XLOC_063735,100359412,101116716,100192427,105604882,114111703,121819509,105616742,101111255,105608906,101103071,101122255,XLOC_069361,105612052,101119604
GO:0000981	sequence-specific DNA binding RNA polymerase II transcription factor activity	molecular_function	0.75737	1	1	1056	25	19038	101107196
GO:0045454	cell redox homeostasis	biological_process	0.75784	1	3	1056	71	19038	1.01124e+26
GO:0016055	Wnt receptor signaling pathway	biological_process	0.75857	1	3	1056	72	19038	1.01115e+26
GO:0003873	6-phosphofructo-2-kinase activity	molecular_function	0.76007	1	1	1056	25	19038	100302303
GO:0006000	fructose metabolic process	biological_process	0.76007	1	1	1056	25	19038	100302303
GO:0034641	cellular nitrogen compound metabolic process	biological_process	0.76057	1	228	1056	4296	19038	101109765,101103140,101115188,101114012,114113147,101114511,101102274,101116889,114116607,114112825,114109630,101113744,101112344,101110078,101104912,101119036,443469,101113112,101112645,101108529,101106958,114111703,105616742,105606599,101121321,105603087,101104979,101119599,101103105,101110423,100302103,101115026,101120348,114113207,101106415,101117613,101111979,101111927,101103311,101112975,10…
GO:0001775	cell activation	biological_process	0.76061	1	5	1056	113	19038	1.01106e+44
GO:1901360	organic cyclic compound metabolic process	biological_process	0.76094	1	227	1056	4278	19038	101116528,101117043,101105321,101107196,101107672,101117900,114110261,101117020,101121174,101109224,101103311,101111927,101117613,101111979,101106415,101121510,101112975,101121441,101115040,101119599,101103105,114113207,101120348,101115026,101110423,100302103,114111703,105606599,101106958,105616742,101108529,101104979,105603087,101121321,101112344,101113744,114109630,114112825,101112645,443469,10…
GO:0010628	positive regulation of gene expression	biological_process	0.76131	1	3	1056	72	19038	1.01116e+26
GO:0045893	positive regulation of transcription, DNA-dependent	biological_process	0.76131	1	3	1056	72	19038	1.1411e+26
GO:0000746	conjugation	biological_process	0.76146	1	1	1056	25	19038	114116187
GO:0042060	wound healing	biological_process	0.76175	1	7	1056	155	19038	1.01106e+62
GO:0009100	glycoprotein metabolic process	biological_process	0.7631	1	5	1056	115	19038	1.00038e+44
GO:0033014	tetrapyrrole biosynthetic process	biological_process	0.76344	1	4	1056	94	19038	1.01108e+35
GO:0004181	metallocarboxypeptidase activity	molecular_function	0.76423	1	1	1056	26	19038	101104474
GO:0010556	regulation of macromolecule biosynthetic process	biological_process	0.76568	1	111	1056	2138	19038	101103071,101120428,101120286,114113264,101108241,101104783,101119818,101102047,101112872,101117358,100359412,101111046,114115360,105601907,114112844,121817953,101113034,101112041,XLOC_091011,101114518,494440,100527962,101123079,100171394,101119938,101123244,101107593,101121188,101115946,101116988,101121093,101108399,114114866,101117336,100169939,101113358,101123658,101110302,101105239,114117799,…
GO:0031326	regulation of cellular biosynthetic process	biological_process	0.76568	1	111	1056	2138	19038	101110699,101122496,101107348,105610305,101102976,114108616,101114648,101115254,101118426,101118128,101118148,101118218,101113358,100169939,101117336,101110302,101123658,101108604,101119014,114117799,101105239,101110976,101114267,114118047,494440,100527962,101114518,XLOC_091011,101112041,101119938,101123244,101107593,100171394,101123079,101115946,101121188,114114866,101121093,101108399,101116988,…
GO:0045935	positive regulation of nucleobase-containing compound metabolic process	biological_process	0.76608	1	4	1056	94	19038	1.1411e+35
GO:0051173	positive regulation of nitrogen compound metabolic process	biological_process	0.76608	1	4	1056	94	19038	1.01116e+35
GO:0051254	positive regulation of RNA metabolic process	biological_process	0.76608	1	4	1056	94	19038	1.01116e+35
GO:0032990	cell part morphogenesis	biological_process	0.76613	1	2	1056	50	19038	1.01103e+17
GO:0048858	cell projection morphogenesis	biological_process	0.76613	1	2	1056	50	19038	1.01103e+17
GO:0000271	polysaccharide biosynthetic process	biological_process	0.76626	1	1	1056	26	19038	105608906
GO:0008033	tRNA processing	biological_process	0.76633	1	7	1056	157	19038	1.0112e+62
GO:0009755	hormone-mediated signaling pathway	biological_process	0.76664	1	3	1056	73	19038	1.01112e+26
GO:0032870	cellular response to hormone stimulus	biological_process	0.76664	1	3	1056	73	19038	1.01112e+26
GO:0051495	positive regulation of cytoskeleton organization	biological_process	0.76669	1	1	1056	26	19038	101118866
GO:0051128	regulation of cellular component organization	biological_process	0.76681	1	8	1056	177	19038	1.01111e+65
GO:0044249	cellular biosynthetic process	biological_process	0.76701	1	219	1056	4117	19038	101122097,114118046,101116716,101107815,101111888,101109364,101121697,114116880,100302349,101104815,101119091,101119408,101118866,101113871,101107860,443155,101120875,114113005,114112822,101104144,101118811,101103792,101119116,101103983,101104051,443519,101118367,114118686,101118054,100286739,105604930,101107623,100135438,114112824,443533,101115095,101112188,101110634,101119854,101104487,10110573…
GO:0006814	sodium ion transport	biological_process	0.76726	1	4	1056	95	19038	1.01124e+35
GO:0009889	regulation of biosynthetic process	biological_process	0.76746	1	111	1056	2139	19038	101121174,101107860,443155,101119408,100302349,101109364,101111888,101107196,101105321,114118046,101107815,114110261,101122097,101117020,101104051,443519,101103105,101103792,101120348,101118811,101110423,101115026,101104144,101111927,101103311,101117613,101111979,101121510,101121441,101112975,101110634,101112188,101112344,101115095,114109630,443469,101104912,101110078,105606599,100286739,10560493…
GO:0004197	cysteine-type endopeptidase activity	molecular_function	0.76765	1	6	1056	137	19038	1.01104e+53
GO:0006364	rRNA processing	biological_process	0.76833	1	4	1056	93	19038	1.01116e+35
GO:0016072	rRNA metabolic process	biological_process	0.76833	1	4	1056	93	19038	1.01116e+35
GO:0016627	oxidoreductase activity, acting on the CH-CH group of donors	molecular_function	0.769	1	4	1056	95	19038	1.01118e+35
GO:0010942	positive regulation of cell death	biological_process	0.76922	1	1	1056	26	19038	114118872
GO:0043065	positive regulation of apoptotic process	biological_process	0.76922	1	1	1056	26	19038	114118872
GO:0043068	positive regulation of programmed cell death	biological_process	0.76922	1	1	1056	26	19038	114118872
GO:0007127	meiosis I	biological_process	0.76981	1	1	1056	26	19038	114115360
GO:0005381	iron ion transmembrane transporter activity	molecular_function	0.77042	1	4	1056	94	19038	1.01113e+35
GO:0005667	transcription factor complex	cellular_component	0.77175	1	4	1056	93	19038	1.01113e+35
GO:0005742	mitochondrial outer membrane translocase complex	cellular_component	0.77201	1	1	1056	26	19038	101107055
GO:0008270	zinc ion binding	molecular_function	0.77278	1	85	1056	1661	19038	105616456,101111888,101110591,114114525,101104461,101106408,101122045,101118065,101119408,101105756,101112275,101103840,101117763,101121510,101118367,101104051,101112385,101119599,101103227,101118832,101110423,105616742,105606599,101118230,101104979,100286739,101112864,105604930,101112188,101110634,101112344,101120553,101112645,114111258,114118892,101107078,114116607,106991182,XLOC_063735,1011031…
GO:0019058	viral infectious cycle	biological_process	0.77301	1	15	1056	319	19038	1.14116e+134
GO:0032784	regulation of DNA-dependent transcription, elongation	biological_process	0.77368	1	1	1056	26	19038	101104783
GO:0016042	lipid catabolic process	biological_process	0.77479	1	2	1056	51	19038	1.05613e+17
GO:0043244	regulation of protein complex disassembly	biological_process	0.77574	1	1	1056	26	19038	101110976
GO:0019752	carboxylic acid metabolic process	biological_process	0.77678	1	19	1056	401	19038	1.01105e+170
GO:0019219	regulation of nucleobase-containing compound metabolic process	biological_process	0.77837	1	111	1056	2146	19038	101107196,101105321,101111888,101109364,101122097,114110261,101117020,101107815,114118046,443155,101107860,101121174,100302349,101119408,101111979,101117613,101103311,101111927,101104144,101121441,101112975,101121510,101103105,443519,101104051,101115026,101110423,101118811,101120348,101103792,105606599,101121321,114118686,105603087,100286739,105604930,114109630,101115095,101112344,101112188,10111…
GO:0051171	regulation of nitrogen compound metabolic process	biological_process	0.77837	1	111	1056	2146	19038	101119854,101116889,101123507,101114012,101109765,101107089,101103140,101109695,101117537,106991182,101121321,105603087,114118686,105604930,100286739,105606599,101110078,101104912,443469,114109630,101115095,101112344,101110634,101112188,101112975,101121441,101121510,101117613,101111979,101111927,101103311,101104144,101110423,101115026,101118811,101103792,101120348,101103105,101104051,443519,10112…
GO:0006725	cellular aromatic compound metabolic process	biological_process	0.7794	1	224	1056	4237	19038	101104051,443519,101118367,101118811,101103792,114113005,114112822,101104144,101113871,443155,101107860,101120875,100302349,101119091,101107157,101119408,101111888,101109364,101121697,114116880,101122097,101105693,101116716,101107815,114118046,105616092,101107089,101119719,101109695,101117537,106991182,101115127,101123507,100188975,101119854,101112862,101104487,101102102,101105735,101115095,10111…
GO:0008484	sulfuric ester hydrolase activity	molecular_function	0.77998	1	1	1056	27	19038	101111726
GO:0009058	biosynthetic process	biological_process	0.78072	1	228	1056	4295	19038	443533,101115095,101110634,101112188,114118686,101118054,100286739,105604930,101107623,100135438,114112824,101117633,101115127,101107089,101109695,101117537,106991182,101119854,101104487,101102102,101105735,101123507,100302349,101104815,101119091,101119408,101118866,101107860,101113871,443155,101120875,101122097,101116716,114118046,101107815,101111888,114113035,114116880,101121697,101109364,10111…
GO:0048284	organelle fusion	biological_process	0.78186	1	1	1056	27	19038	105608906
GO:0006289	nucleotide-excision repair	biological_process	0.78191	1	1	1056	27	19038	101102343
GO:0071495	cellular response to endogenous stimulus	biological_process	0.78266	1	3	1056	75	19038	1.01112e+26
GO:0000793	condensed chromosome	cellular_component	0.78267	1	5	1056	118	19038	1.01111e+41
GO:0007224	smoothened signaling pathway	biological_process	0.7827	1	1	1056	27	19038	101106317
GO:0006826	iron ion transport	biological_process	0.78386	1	4	1056	96	19038	1.01107e+35
GO:0003697	single-stranded DNA binding	molecular_function	0.78418	1	1	1056	27	19038	101116317
GO:0046483	heterocycle metabolic process	biological_process	0.78469	1	223	1056	4223	19038	101114511,114116607,101116889,101102274,101115188,101109765,101103140,114113147,101114012,114111703,105606599,101106958,105616742,101108529,101104979,101121321,105603087,101112344,114112825,114109630,101113744,101104912,101119036,443469,101112645,101113112,101110078,101103311,101111927,101106415,101117613,101111979,101121510,101121441,101112975,101103105,101119599,114113207,101120348,100302103,10…
GO:0006270	DNA replication initiation	biological_process	0.78503	1	4	1056	96	19038	1.01105e+35
GO:0015074	DNA integration	biological_process	0.78561	1	3	1056	74	19038	101107157,114116607,XLOC_069361
GO:0009891	positive regulation of biosynthetic process	biological_process	0.78764	1	4	1056	97	19038	1.01116e+35
GO:0010557	positive regulation of macromolecule biosynthetic process	biological_process	0.78764	1	4	1056	97	19038	1.0112e+35
GO:0031328	positive regulation of cellular biosynthetic process	biological_process	0.78764	1	4	1056	97	19038	1.1411e+35
GO:0042254	ribosome biogenesis	biological_process	0.78774	1	5	1056	117	19038	1.0111e+41
GO:0070972	protein localization to endoplasmic reticulum	biological_process	0.7878	1	2	1056	52	19038	1.01105e+17
GO:0006974	response to DNA damage stimulus	biological_process	0.78858	1	27	1056	559	19038	101119344,101121486,101113358,114110562,101112872,114109364,443155,101117358,105604930,101119014,101122097,114117799,101104887,100527962,101110699,101102343,106991182,101123079,101107593,101121510,101115254,101121889,101116317,101116203,101117102,101116988,101123507
GO:0008827	cytochrome o ubiquinol oxidase activity	molecular_function	0.78908	1	1	1056	28	19038	101109765
GO:0048513	organ development	biological_process	0.78982	1	3	1056	74	19038	1.01105e+26
GO:0015077	monovalent inorganic cation transmembrane transporter activity	molecular_function	0.79033	1	26	1056	542	19038	101123578,101120042,101108165,101107980,101121174,101113744,101115095,101120875,100302624,101117892,121817553,100359412,101123528,101103792,101113095,101116078,101120935,101113595,101115005,101103774,101120989,101102032,101119372,101111508,101123332,101121071
GO:0042168	heme metabolic process	biological_process	0.79054	1	1	1056	28	19038	101115278
GO:0044765	single-organism transport	biological_process	0.791	1	108	1056	2104	19038	101111082,101122496,101104887,101106745,101120572,101113020,101107980,492300,101123578,XLOC_125215,101106373,101119460,101110976,101108027,101102366,101114773,101122615,101118296,101101940,101122054,101114615,101110893,101105547,101119078,494440,101105216,101111508,101104978,114114866,101123332,101115005,114108606,101102032,101102047,101111654,101120286,114110561,114112844,101107318,101123528,105…
GO:0005524	ATP binding	molecular_function	0.79123	1	82	1056	1623	19038	101120630,101104887,101118410,101103084,101113346,101105574,101107888,101122496,101110770,101106890,101114648,101115254,105605648,114108616,100302303,101119865,101107720,101110124,114118052,101104745,100217411,101104730,101118350,101114773,101110893,101119460,101114267,101114518,101102259,101120032,101104473,101119938,101101915,101123008,101116317,101111508,101120116,101108399,101105117,114114866…
GO:2000112	regulation of cellular macromolecule biosynthetic process	biological_process	0.79135	1	110	1056	2135	19038	114110261,101122097,101117020,114118046,101107815,101107196,101105321,101111888,101109364,100302349,101119408,101107860,443155,101121174,101121441,101112975,101121510,101111979,101117613,101103311,101111927,101104144,101110423,101115026,101118811,101120348,101103792,101103105,101104051,443519,101121321,114118686,105603087,105604930,100286739,105606599,101110078,101104912,443469,114109630,10111509…
GO:0051259	protein oligomerization	biological_process	0.79165	1	5	1056	119	19038	1.01108e+44
GO:0051705	multi-organism behavior	biological_process	0.79205	1	1	1056	28	19038	101104887
GO:0043086	negative regulation of catalytic activity	biological_process	0.79271	1	2	1056	52	19038	1.05606e+17
GO:0044092	negative regulation of molecular function	biological_process	0.79271	1	2	1056	52	19038	1.05606e+17
GO:0000226	microtubule cytoskeleton organization	biological_process	0.79327	1	6	1056	142	19038	1.0112e+53
GO:0010948	negative regulation of cell cycle process	biological_process	0.79454	1	2	1056	52	19038	443155101108076
GO:0005213	structural constituent of chorion	molecular_function	0.79534	1	3	1056	76	19038	4.43168e+20
GO:0007292	female gamete generation	biological_process	0.79534	1	3	1056	76	19038	1.01123e+20
GO:0007304	chorion-containing eggshell formation	biological_process	0.79534	1	3	1056	76	19038	1.01123e+20
GO:0030703	eggshell formation	biological_process	0.79534	1	3	1056	76	19038	4.43168e+20
GO:0030707	ovarian follicle cell development	biological_process	0.79534	1	3	1056	76	19038	4.43168e+20
GO:0048477	oogenesis	biological_process	0.79534	1	3	1056	76	19038	4.43168e+20
GO:0033179	proton-transporting V-type ATPase, V0 domain	cellular_component	0.79539	1	2	1056	53	19038	1.01104e+17
GO:0032270	positive regulation of cellular protein metabolic process	biological_process	0.79551	1	1	1056	28	19038	114109630
GO:0051247	positive regulation of protein metabolic process	biological_process	0.79551	1	1	1056	28	19038	114109630
GO:0051336	regulation of hydrolase activity	biological_process	0.7956	1	3	1056	76	19038	1.01122e+26
GO:0044770	cell cycle phase transition	biological_process	0.79576	1	2	1056	52	19038	101108076443155
GO:1901987	regulation of cell cycle phase transition	biological_process	0.79576	1	2	1056	52	19038	443155101108076
GO:0042600	chorion	cellular_component	0.796	1	4	1056	98	19038	1.01115e+29
GO:0030155	regulation of cell adhesion	biological_process	0.79631	1	1	1056	28	19038	105608906
GO:0032559	adenyl ribonucleotide binding	molecular_function	0.79648	1	82	1056	1626	19038	101115534,101123507,101115680,101122306,101119042,101108969,101118054,101122928,101104979,101101877,100135438,101122459,101122739,101113085,101113744,101103411,105608622,101101929,101119116,100302103,101117900,101109364,101121697,101106209,101106640,101105713,101119091,101122744,101115883,101120826,101108760,101115254,101106890,101110770,101114648,105605648,114108616,100302303,101107720,101119865…
GO:0009247	glycolipid biosynthetic process	biological_process	0.79816	1	2	1056	53	19038	1.01118e+17
GO:0046467	membrane lipid biosynthetic process	biological_process	0.79816	1	2	1056	53	19038	1.01115e+17
GO:0005789	endoplasmic reticulum membrane	cellular_component	0.79855	1	8	1056	184	19038	1.01111e+71
GO:0004175	endopeptidase activity	molecular_function	0.79886	1	35	1056	717	19038	101106381,101112848,105605871,101120301,101118205,101121519,101106362,101105466,101121013,101118778,101121761,101110381,101114683,101102723,101116733,101112049,101111721,101110976,101121267,105603085,101104051,101120751,443184,101116988,101103840,106990118,101122213,114118738,101114859,101118986,101104072,101118866,114115323,101104849,101110127
GO:0034220	ion transmembrane transport	biological_process	0.79899	1	15	1056	326	19038	1.01124e+134
GO:0019843	rRNA binding	molecular_function	0.799	1	1	1056	27	19038	101102330
GO:0044764	multi-organism cellular process	biological_process	0.80091	1	33	1056	680	19038	114115360,114118046,101105693,101117020,XLOC_069361,101102351,443489,114116113,114116187,101121093,101114518,443227,101104535,101114615,101114773,114118047,105616742,106991171,101110976,101111396,101104661,101108006,443413,114108616,114116607,101115254,114118872,101116769,101122306,101119042,106991182,101117537,101109765
GO:0006793	phosphorus metabolic process	biological_process	0.80111	1	62	1056	1245	19038	101111654,101107157,101122744,101110351,XLOC_069361,101111281,101111066,101115883,101118334,101120826,101108760,101120875,101114859,101122097,101102131,101117900,101119420,121819509,101117043,100194428,101105713,101103983,100302103,101113438,101118367,101106160,101122455,101102973,101115005,101123008,101123332,101110124,101122459,101122739,101111683,101102342,114118052,101114703,100217411,1141096…
GO:0046039	GTP metabolic process	biological_process	0.80225	1	1	1056	29	19038	101122097
GO:0030076	light-harvesting complex	cellular_component	0.80308	1	1	1056	29	19038	101118167
GO:0006334	nucleosome assembly	biological_process	0.80345	1	2	1056	52	19038	1.01102e+17
GO:0031497	chromatin assembly	biological_process	0.80345	1	2	1056	52	19038	1.01102e+17
GO:0034728	nucleosome organization	biological_process	0.80345	1	2	1056	52	19038	1.14113e+17
GO:0080090	regulation of primary metabolic process	biological_process	0.80354	1	114	1056	2218	19038	101115946,101121188,114114866,101108399,101121093,101116988,100527962,494440,101114518,XLOC_091011,101112041,101119938,101107593,101123244,101122455,100171394,101123079,105601907,114115360,101111046,100359412,101113034,121817953,114112844,101108241,114113264,101120286,101103071,101120428,101117358,101112872,101102047,101118334,101119818,101104783,101102976,114108616,101114648,101115254,101118426,…
GO:0043248	proteasome assembly	biological_process	0.80384	1	1	1056	29	19038	101114679
GO:0016740	transferase activity	molecular_function	0.80399	1	135	1056	2621	19038	101115883,101120826,101102568,101108760,101110266,101117020,101117900,101108398,101110423,100302103,101114008,101119599,101120935,101114362,101121510,101121441,101112844,101111964,101112645,101113112,101110078,101122739,101122928,105616742,100145857,101108529,101104089,101105466,105616599,101122246,101122297,121817902,114116607,101120989,101114511,101114341,121816444,101117358,121817901,101111638…
GO:0051015	actin filament binding	molecular_function	0.80438	1	1	1056	29	19038	101119619
GO:0043168	anion binding	molecular_function	0.80461	1	114	1056	2235	19038	101117900,101106640,101105713,101106209,114113035,101121697,101109364,101122744,101119091,101108760,101120875,101115883,101106317,101120826,101103411,780460,101103774,101119597,101101929,101104144,105608622,100302103,101122570,101119116,101107395,101121661,101118054,101122928,101104979,100135438,100145857,101101877,443533,100145877,101122459,101113085,101113744,101122739,114110560,101115534,10110…
GO:0008284	positive regulation of cell proliferation	biological_process	0.80724	1	1	1056	29	19038	101104395
GO:0016477	cell migration	biological_process	0.80886	1	1	1056	29	19038	105608906
GO:0030334	regulation of cell migration	biological_process	0.80886	1	1	1056	29	19038	105608906
GO:0016050	vesicle organization	biological_process	0.80898	1	1	1056	29	19038	114111619
GO:0019222	regulation of metabolic process	biological_process	0.80925	1	124	1056	2409	19038	101115946,101121188,101116988,114114866,101121093,101108399,XLOC_091011,101112041,494440,100527962,101114518,101114631,101123079,101119938,101107593,101123244,114112680,100171394,101122455,114115360,101111046,100359412,105601907,121817901,114112844,101113034,121817953,101120286,101103071,101120428,101108241,114113264,101102047,101118334,101112872,101104783,101119818,101117358,114108616,101115254,…
GO:0006904	vesicle docking involved in exocytosis	biological_process	0.81171	1	1	1056	30	19038	101120572
GO:0004719	protein-L-isoaspartate (D-aspartate) O-methyltransferase activity	molecular_function	0.81217	1	1	1056	29	19038	101107011
GO:0051234	establishment of localization	biological_process	0.81359	1	142	1056	2758	19038	101110976,101119460,101114773,101118296,101101940,101108027,101102366,101119848,101120572,100302360,101114648,101111082,105603785,101106631,101123528,105608906,101107318,101108864,100359412,114115360,101102047,101111654,114114866,101105216,101102032,114108606,101101915,101105547,101119078,101112734,101123393,101107395,101111069,101113744,101113504,101119870,497271,101111901,101116769,101119372,10…
GO:0007338	single fertilization	biological_process	0.81467	1	1	1056	30	19038	114108678
GO:0009566	fertilization	biological_process	0.81467	1	1	1056	30	19038	114108678
GO:0007219	Notch signaling pathway	biological_process	0.81499	1	1	1056	30	19038	105605912
GO:0010941	regulation of cell death	biological_process	0.81534	1	6	1056	145	19038	1.01114e+50
GO:0042981	regulation of apoptotic process	biological_process	0.81534	1	6	1056	145	19038	5.54329e+50
GO:0043067	regulation of programmed cell death	biological_process	0.81534	1	6	1056	145	19038	5.54329e+50
GO:0030170	pyridoxal phosphate binding	molecular_function	0.81543	1	2	1056	56	19038	1.14113e+17
GO:0006643	membrane lipid metabolic process	biological_process	0.81612	1	3	1056	79	19038	1.01118e+26
GO:0006796	phosphate-containing compound metabolic process	biological_process	0.81658	1	61	1056	1234	19038	101115680,101119865,101122306,101117497,114116607,105605648,101105735,101105574,101117633,101102917,101120630,101108969,101118410,101103084,105616742,101119460,114118047,101108687,101118350,101122928,101104979,100217411,114109630,101122739,101111683,101102342,114118052,101114703,101122459,101110124,101123332,101123008,101115005,101122455,101102973,101113438,101106160,101118367,100302103,101103983…
GO:0010639	negative regulation of organelle organization	biological_process	0.8177	1	2	1056	55	19038	1.01108e+17
GO:0051240	positive regulation of multicellular organismal process	biological_process	0.81804	1	1	1056	30	19038	101104395
GO:0006139	nucleobase-containing compound metabolic process	biological_process	0.81822	1	213	1056	4066	19038	101108399,101121093,114114866,101116317,101121188,101110936,101115946,101121889,100171394,101123244,101102343,101114518,100527962,101113034,101123336,101116330,100359412,114115360,101102351,101117358,101114859,114112842,101102047,114113264,101103071,101120428,121816444,101118148,101119865,101116236,101118218,101102976,101105652,101114648,114108616,114110625,105610305,101107348,101110699,114112826…
GO:0051179	localization	biological_process	0.81909	1	150	1056	2912	19038	101114648,101110809,101120572,100302360,101106631,101119619,101111082,105603785,101101940,101114773,101118296,101108027,101102366,101110976,101119460,101113077,101119848,101102032,101101915,114108606,114114866,101105216,101119078,101105547,100359412,101108864,114115360,101123528,105608906,101107318,101111654,101102047,101119372,101120989,101113595,101112224,101116769,101105466,101116078,101107395…
GO:0006333	chromatin assembly or disassembly	biological_process	0.81971	1	2	1056	54	19038	1.01102e+17
GO:0016836	hydro-lyase activity	molecular_function	0.82023	1	3	1056	80	19038	1.01106e+26
GO:0016706	oxidoreductase activity, acting on paired donors, with incorporation or reduction of molecular oxygen, 2-oxoglutarate as one donor, and incorporation of one atom each of oxygen into both donors	molecular_function	0.82071	1	1	1056	31	19038	101110351
GO:0022613	ribonucleoprotein complex biogenesis	biological_process	0.82135	1	5	1056	123	19038	1.14117e+41
GO:0008194	UDP-glycosyltransferase activity	molecular_function	0.82148	1	3	1056	80	19038	1.14118e+26
GO:0007094	mitotic spindle assembly checkpoint	biological_process	0.82229	1	1	1056	30	19038	101108076
GO:0031577	spindle checkpoint	biological_process	0.82229	1	1	1056	30	19038	101108076
GO:0045839	negative regulation of mitosis	biological_process	0.82229	1	1	1056	30	19038	101108076
GO:0045841	negative regulation of mitotic metaphase/anaphase transition	biological_process	0.82229	1	1	1056	30	19038	101108076
GO:0051784	negative regulation of nuclear division	biological_process	0.82229	1	1	1056	30	19038	101108076
GO:0071173	spindle assembly checkpoint	biological_process	0.82229	1	1	1056	30	19038	101108076
GO:0071174	mitotic spindle checkpoint	biological_process	0.82229	1	1	1056	30	19038	101108076
GO:1902100	negative regulation of metaphase/anaphase transition of cell cycle	biological_process	0.82229	1	1	1056	30	19038	101108076
GO:0052126	movement in host environment	biological_process	0.82265	1	2	1056	56	19038	101104661443227
GO:0052192	movement in environment of other organism involved in symbiotic interaction	biological_process	0.82265	1	2	1056	56	19038	101104661443227
GO:0008235	metalloexopeptidase activity	molecular_function	0.82308	1	1	1056	31	19038	101104474
GO:0005743	mitochondrial inner membrane	cellular_component	0.82337	1	5	1056	124	19038	1.01121e+44
GO:0044707	single-multicellular organism process	biological_process	0.82341	1	36	1056	743	19038	105608906,101104395,101119408,101123403,101117600,101113706,114108725,114116130,114116076,105605912,101122570,101117408,101106373,105605978,101106510,101111396,101110976,101107980,101114683,114109630,100196905,101110078,101106681,101102171,101120412,101104863,101114341,780511,101103339,101106490,101102712,114108678,114111269,101123649,101106741,114118382
GO:0010506	regulation of autophagy	biological_process	0.82407	1	4	1056	103	19038	1.01116e+35
GO:0005615	extracellular space	cellular_component	0.82493	1	9	1056	209	19038	1.01107e+80
GO:0031323	regulation of cellular metabolic process	biological_process	0.8252	1	118	1056	2308	19038	114109630,101115095,101112344,101110634,101112188,101110078,101104912,443469,105606599,101121321,105603087,114118686,100286739,105604930,101109765,101107089,101109695,101103140,101117537,106991182,101114012,101114502,101123507,101119854,101116889,443155,101107860,101121174,100302349,101119408,101105321,101107196,101111888,101109364,101117020,101122097,114110261,101107815,101115969,114118046,10110…
GO:0043436	oxoacid metabolic process	biological_process	0.82525	1	19	1056	416	19038	1.01115e+170
GO:0032403	protein complex binding	molecular_function	0.82569	1	5	1056	124	19038	1.01121e+44
GO:0000428	DNA-directed RNA polymerase complex	cellular_component	0.82577	1	5	1056	124	19038	1.01115e+44
GO:0030880	RNA polymerase complex	cellular_component	0.82577	1	5	1056	124	19038	1.01111e+44
GO:0055029	nuclear DNA-directed RNA polymerase complex	cellular_component	0.82577	1	5	1056	124	19038	1.01104e+44
GO:0005876	spindle microtubule	cellular_component	0.82656	1	1	1056	31	19038	101119619
GO:0018193	peptidyl-amino acid modification	biological_process	0.8295	1	2	1056	57	19038	1.01107e+17
GO:0019898	extrinsic to membrane	cellular_component	0.8305	1	3	1056	81	19038	1.00359e+26
GO:0071705	nitrogen compound transport	biological_process	0.8307	1	8	1056	191	19038	1.01105e+68
GO:0006810	transport	biological_process	0.83121	1	141	1056	2753	19038	101113095,101120350,101120348,101120935,101120940,443184,101112012,101106047,101121071,101103311,101110267,101111412,101110536,101110723,100302624,101105960,101121174,101115883,101114882,101105365,101105321,101110591,101105466,101116078,101119372,101120989,101113595,101112224,101116769,497271,101119870,101111901,101111069,101113744,101113504,101123393,101107395,101119078,101105547,101102032,10110…
GO:0016410	N-acyltransferase activity	molecular_function	0.83158	1	3	1056	81	19038	1.01121e+26
GO:0044767	single-organism developmental process	biological_process	0.83194	1	13	1056	295	19038	1.01116e+110
GO:0005577	fibrinogen complex	cellular_component	0.83239	1	4	1056	103	19038	1.01118e+35
GO:0030168	platelet activation	biological_process	0.83239	1	4	1056	103	19038	1.01106e+35
GO:0007093	mitotic cell cycle checkpoint	biological_process	0.83249	1	1	1056	31	19038	101108076
GO:0010638	positive regulation of organelle organization	biological_process	0.83326	1	1	1056	32	19038	101118866
GO:0043603	cellular amide metabolic process	biological_process	0.83351	1	2	1056	58	19038	1.01118e+17
GO:0009579	thylakoid	cellular_component	0.83366	1	6	1056	149	19038	1.01121e+53
GO:0044436	thylakoid part	cellular_component	0.83366	1	6	1056	149	19038	1.01121e+53
GO:1901700	response to oxygen-containing compound	biological_process	0.83407	1	1	1056	32	19038	101118819
GO:0042175	nuclear outer membrane-endoplasmic reticulum membrane network	cellular_component	0.83418	1	8	1056	192	19038	1.01111e+71
GO:0030554	adenyl nucleotide binding	molecular_function	0.83596	1	82	1056	1650	19038	101110124,101104745,114118052,101104730,100217411,101118350,101110893,101114773,101119460,101114267,101118410,101103084,101104887,101120630,101105574,101113346,101122496,101107888,105605648,114108616,101106890,101114648,101110770,101115254,100302303,101119865,101107720,101120796,101111066,101108241,101111281,101110351,101115927,114115360,101102131,101123321,100194428,101119413,101114518,101102259…
GO:1901576	organic substance biosynthetic process	biological_process	0.83697	1	220	1056	4196	19038	101107860,101113871,101120875,443155,101104815,100302349,101119091,101119408,101118866,101121697,114116880,101109364,101111888,101107815,101116716,114118046,101122097,101118367,443519,101104051,101118811,101103792,101103983,101119116,114112822,101104144,114113005,101110634,101112188,101115095,114112824,101107623,100135438,101118054,100286739,105604930,114118686,101117537,106991182,101107089,10110…
GO:0007059	chromosome segregation	biological_process	0.83712	1	3	1056	83	19038	1.14119e+26
GO:0016763	transferase activity, transferring pentosyl groups	molecular_function	0.8372	1	3	1056	82	19038	1.0111e+26
GO:0048585	negative regulation of response to stimulus	biological_process	0.83735	1	1	1056	32	19038	114109630
GO:0048519	negative regulation of biological process	biological_process	0.83905	1	11	1056	255	19038	101102366,101110621,114110560,101114341,101110976,101113020,101109104,XLOC_125215,443155,101108076,114109630
GO:0006259	DNA metabolic process	biological_process	0.83913	1	59	1056	1199	19038	101102343,100527962,101123079,101117654,101119599,101107593,101121510,101117102,101116317,101121889,101116988,101120116,101108399,101106415,101107157,101119344,XLOC_069361,101111066,101104783,101112872,101102351,101117358,443155,100359412,101116716,114115360,101122097,101123336,101121697,101109364,114112844,121817953,101104887,101110699,101107348,101115188,106991182,101115254,101102274,114116607,…
GO:0006082	organic acid metabolic process	biological_process	0.83931	1	19	1056	421	19038	1.01119e+170
GO:0070206	protein trimerization	biological_process	0.83936	1	1	1056	32	19038	101107853
GO:0008380	RNA splicing	biological_process	0.83958	1	2	1056	59	19038	1.01107e+17
GO:0044403	symbiosis, encompassing mutualism through parasitism	biological_process	0.83963	1	32	1056	677	19038	114115360,114118046,101105693,101117020,XLOC_069361,101102351,443489,114116113,101121093,101114518,443227,101104535,101114615,101114773,114118047,105616742,106991171,101110976,101111396,101104661,101108006,443413,114108616,114116607,101115254,114118872,101116769,101122306,101119042,106991182,101117537,101109765
GO:0065008	regulation of biological quality	biological_process	0.83999	1	29	1056	617	19038	101111508,101116769,101117600,101103339,101118669,101104643,101114648,114108725,114110560,114118872,101123514,101114658,101114631,101123649,101117537,101119619,101106510,101106373,101110976,114115360,101114615,121817901,101105960,114109630,101110078,101123403,XLOC_069361,101106681,101119870
GO:0008608	attachment of spindle microtubules to kinetochore	biological_process	0.84105	1	1	1056	33	19038	101119619
GO:0016310	phosphorylation	biological_process	0.84107	1	33	1056	704	19038	101108760,101118334,101120826,101115883,101111281,101111066,101110351,101122744,101105713,100194428,101102131,101117900,101102973,101122455,100302103,101123008,100217411,114109630,114118052,101122739,101122459,101110124,114118047,101122928,101118350,101105574,101118410,101108969,101103084,101120630,101122306,101115680,105605648
GO:0009896	positive regulation of catabolic process	biological_process	0.84237	1	3	1056	83	19038	1.01115e+26
GO:0010508	positive regulation of autophagy	biological_process	0.84237	1	3	1056	83	19038	1.01109e+26
GO:0031331	positive regulation of cellular catabolic process	biological_process	0.84237	1	3	1056	83	19038	1.01116e+26
GO:1901565	organonitrogen compound catabolic process	biological_process	0.84273	1	4	1056	107	19038	1.01115e+35
GO:0003774	motor activity	molecular_function	0.84296	1	6	1056	153	19038	1.14115e+50
GO:0016861	intramolecular oxidoreductase activity, interconverting aldoses and ketoses	molecular_function	0.84318	1	1	1056	33	19038	101114859
GO:0008565	protein transporter activity	molecular_function	0.84349	1	3	1056	83	19038	1.01104e+26
GO:0008234	cysteine-type peptidase activity	molecular_function	0.84539	1	8	1056	195	19038	1.01104e+68
GO:0044445	cytosolic part	cellular_component	0.84552	1	3	1056	83	19038	1.01105e+26
GO:0044419	interspecies interaction between organisms	biological_process	0.84619	1	32	1056	680	19038	101108006,443413,101104661,114118047,105616742,101111396,101110976,106991171,101104535,101114615,101114773,106991182,101117537,101109765,101119042,101116769,101122306,114108616,114116607,101115254,114118872,101102351,XLOC_069361,114115360,114118046,101105693,101117020,443227,101114518,101121093,443489,114116113
GO:1901136	carbohydrate derivative catabolic process	biological_process	0.84666	1	2	1056	60	19038	1.01122e+17
GO:0042127	regulation of cell proliferation	biological_process	0.84685	1	1	1056	33	19038	101104395
GO:0006820	anion transport	biological_process	0.84744	1	8	1056	195	19038	1.01112e+68
GO:0016779	nucleotidyltransferase activity	molecular_function	0.84929	1	21	1056	464	19038	105616742,101106373,114116880,101108529,101110976,101116716,101122928,101104783,101117358,101116202,101112645,121816444,XLOC_069361,101120682,101110078,101108399,114116607,101121955,101119599,101104051,101110699
GO:0022406	membrane docking	biological_process	0.85024	1	1	1056	34	19038	101120572
GO:0048278	vesicle docking	biological_process	0.85024	1	1	1056	34	19038	101120572
GO:0022603	regulation of anatomical structure morphogenesis	biological_process	0.85059	1	1	1056	34	19038	101114341
GO:0004713	protein tyrosine kinase activity	molecular_function	0.8507	1	1	1056	34	19038	101110351
GO:0008324	cation transmembrane transporter activity	molecular_function	0.8511	1	43	1056	899	19038	101105791,101113020,101113595,101120989,101119372,101116078,101118819,101114155,101110976,101114615,101107395,101107980,101115095,101113744,101123578,101120042,101108165,101111508,101104978,101103311,114114866,101121071,101123332,101115005,101103774,101104643,114116113,101102032,101111268,101120935,101112385,101103792,101113095,105608906,101123528,101117892,100359412,121817553,101108864,101121174…
GO:1901991	negative regulation of mitotic cell cycle phase transition	biological_process	0.85123	1	1	1056	33	19038	101108076
GO:0010340	carboxyl-O-methyltransferase activity	molecular_function	0.85146	1	1	1056	33	19038	101107011
GO:0051998	protein carboxyl O-methyltransferase activity	molecular_function	0.85146	1	1	1056	33	19038	101107011
GO:0033993	response to lipid	biological_process	0.85158	1	2	1056	61	19038	1.01112e+17
GO:0043401	steroid hormone mediated signaling pathway	biological_process	0.85158	1	2	1056	61	19038	1.00287e+17
GO:0048545	response to steroid hormone stimulus	biological_process	0.85158	1	2	1056	61	19038	1.00287e+17
GO:0071383	cellular response to steroid hormone stimulus	biological_process	0.85158	1	2	1056	61	19038	1.00287e+17
GO:0071396	cellular response to lipid	biological_process	0.85158	1	2	1056	61	19038	1.00287e+17
GO:0071407	cellular response to organic cyclic compound	biological_process	0.85158	1	2	1056	61	19038	1.00287e+17
GO:0000145	exocyst	cellular_component	0.85196	1	1	1056	34	19038	101120572
GO:0000276	mitochondrial proton-transporting ATP synthase complex, coupling factor F(o)	cellular_component	0.85438	1	1	1056	34	19038	101120875
GO:0006520	cellular amino acid metabolic process	biological_process	0.85469	1	13	1056	303	19038	1.01107e+116
GO:0004536	deoxyribonuclease activity	molecular_function	0.8551	1	6	1056	154	19038	1.01106e+53
GO:0032553	ribonucleotide binding	molecular_function	0.85574	1	95	1056	1910	19038	101115534,101123507,101105791,101115680,101122306,101119042,101108969,101118054,101104979,101122928,101107395,101101877,100135438,100145877,443533,101122459,101122739,101113085,101113744,101103411,105608622,101101929,101119116,100302103,101117900,101121697,101109364,101106640,101105713,101106209,101119091,101122744,101115883,101120826,101106317,101108760,101120875,101106890,101110770,101114648,10…
GO:0007017	microtubule-based process	biological_process	0.8561	1	9	1056	221	19038	1.0112e+80
GO:0006383	transcription from RNA polymerase III promoter	biological_process	0.85617	1	1	1056	34	19038	101110976
GO:1901575	organic substance catabolic process	biological_process	0.85641	1	19	1056	427	19038	1.00216e+167
GO:0005829	cytosol	cellular_component	0.85648	1	3	1056	85	19038	1.01102e+26
GO:0004620	phospholipase activity	molecular_function	0.85691	1	1	1056	35	19038	105612589
GO:0051188	cofactor biosynthetic process	biological_process	0.85869	1	5	1056	133	19038	1.01107e+44
GO:0006402	mRNA catabolic process	biological_process	0.85906	1	1	1056	35	19038	101119719
GO:0007010	cytoskeleton organization	biological_process	0.85918	1	23	1056	510	19038	1.01118e+203
GO:0051130	positive regulation of cellular component organization	biological_process	0.86007	1	1	1056	35	19038	101118866
GO:0004672	protein kinase activity	molecular_function	0.8605	1	33	1056	713	19038	101122306,101115680,105605648,101105574,101118410,101108969,101103084,101120630,101106631,101122928,101118350,114118052,101122739,100217411,101110124,101104661,101122459,101104167,114114866,101123008,100302103,100194428,101105713,101117900,101102131,101120826,101115883,101108760,101114679,101111281,101111066,101122744,101110351
GO:0019866	organelle inner membrane	cellular_component	0.86119	1	5	1056	132	19038	1.00302e+44
GO:0051082	unfolded protein binding	molecular_function	0.86152	1	5	1056	132	19038	1.01106e+44
GO:0009378	four-way junction helicase activity	molecular_function	0.86272	1	2	1056	62	19038	1.01124e+17
GO:0008064	regulation of actin polymerization or depolymerization	biological_process	0.86322	1	1	1056	35	19038	101110976
GO:0008154	actin polymerization or depolymerization	biological_process	0.86322	1	1	1056	35	19038	101110976
GO:0030041	actin filament polymerization	biological_process	0.86322	1	1	1056	35	19038	101110976
GO:0030832	regulation of actin filament length	biological_process	0.86322	1	1	1056	35	19038	101110976
GO:0030833	regulation of actin filament polymerization	biological_process	0.86322	1	1	1056	35	19038	101110976
GO:0032271	regulation of protein polymerization	biological_process	0.86322	1	1	1056	35	19038	101110976
GO:0032535	regulation of cellular component size	biological_process	0.86322	1	1	1056	35	19038	101110976
GO:0032956	regulation of actin cytoskeleton organization	biological_process	0.86322	1	1	1056	35	19038	101110976
GO:0032970	regulation of actin filament-based process	biological_process	0.86322	1	1	1056	35	19038	101110976
GO:0043254	regulation of protein complex assembly	biological_process	0.86322	1	1	1056	35	19038	101110976
GO:0051270	regulation of cellular component movement	biological_process	0.86381	1	1	1056	35	19038	105608906
GO:2000145	regulation of cell motility	biological_process	0.86381	1	1	1056	35	19038	105608906
GO:0019012	virion	cellular_component	0.86428	1	33	1056	709	19038	101122255,105612052,443413,101122615,114111703,105616742,105604882,101109077,101110976,106991171,105601981,XLOC_063735,101123586,101109765,114116607,101110381,101103071,XLOC_069361,101119604,101116716,100359412,100192427,101105693,121819509,101111255,105608906,101103983,494440,101121383,443519,443489,101117600,101121093
GO:0009055	electron carrier activity	molecular_function	0.86459	1	6	1056	154	19038	1.14109e+53
GO:0043412	macromolecule modification	biological_process	0.86477	1	73	1056	1491	19038	101106415,100302103,101102973,101117900,101122045,114114525,114118046,101104461,101105713,101107196,101122744,101108760,101120826,101115883,101120989,101117497,101122306,101114341,101115680,101117633,101108969,101104089,101107089,121817549,106991182,101102712,101122928,101114463,101122459,101116878,114109630,101102342,101112188,101113504,101122739,101123008,101110286,101122455,101111638,101102131…
GO:0008146	sulfotransferase activity	molecular_function	0.86492	1	2	1056	63	19038	1.01114e+17
GO:0005319	lipid transporter activity	molecular_function	0.86598	1	1	1056	36	19038	101115095
GO:0007091	metaphase/anaphase transition of mitotic cell cycle	biological_process	0.86626	1	1	1056	35	19038	101108076
GO:0030071	regulation of mitotic metaphase/anaphase transition	biological_process	0.86626	1	1	1056	35	19038	101108076
GO:0044784	metaphase/anaphase transition of cell cycle	biological_process	0.86626	1	1	1056	35	19038	101108076
GO:1902099	regulation of metaphase/anaphase transition of cell cycle	biological_process	0.86626	1	1	1056	35	19038	101108076
GO:0009611	response to wounding	biological_process	0.86635	1	7	1056	177	19038	1.01124e+62
GO:0016888	endodeoxyribonuclease activity, producing 5'-phosphomonoesters	molecular_function	0.86706	1	1	1056	36	19038	101115762
GO:0050776	regulation of immune response	biological_process	0.86717	1	1	1056	35	19038	101102917
GO:0006140	regulation of nucleotide metabolic process	biological_process	0.86799	1	1	1056	36	19038	101122097
GO:0006195	purine nucleotide catabolic process	biological_process	0.86799	1	1	1056	36	19038	101122097
GO:0009118	regulation of nucleoside metabolic process	biological_process	0.86799	1	1	1056	36	19038	101122097
GO:0030811	regulation of nucleotide catabolic process	biological_process	0.86799	1	1	1056	36	19038	101122097
GO:0033121	regulation of purine nucleotide catabolic process	biological_process	0.86799	1	1	1056	36	19038	101122097
GO:0072523	purine-containing compound catabolic process	biological_process	0.86799	1	1	1056	36	19038	101122097
GO:1900542	regulation of purine nucleotide metabolic process	biological_process	0.86799	1	1	1056	36	19038	101122097
GO:0006304	DNA modification	biological_process	0.86813	1	1	1056	36	19038	101106415
GO:0050661	NADP binding	molecular_function	0.86916	1	1	1056	36	19038	101114124
GO:0015144	carbohydrate transmembrane transporter activity	molecular_function	0.87017	1	1	1056	36	19038	101110976
GO:1901476	carbohydrate transporter activity	molecular_function	0.87017	1	1	1056	36	19038	101110976
GO:0010629	negative regulation of gene expression	biological_process	0.8707	1	1	1056	36	19038	101110621
GO:0008017	microtubule binding	molecular_function	0.87146	1	4	1056	113	19038	1.01102e+35
GO:0031090	organelle membrane	cellular_component	0.87152	1	24	1056	533	19038	1.01107e+215
GO:0001882	nucleoside binding	molecular_function	0.87343	1	93	1056	1886	19038	101120630,101104887,101118410,101103084,101113346,100302084,101105574,101107888,101122496,101106890,101114648,101110770,101115254,114108616,105605648,100302303,101123365,101113020,101119865,101107720,101110124,101121740,101104745,114118052,101111683,101104730,100217411,101118350,101114773,101110893,101119460,101114267,101114518,101102259,101120032,101104473,101119938,101101915,101123008,101116317…
GO:0008135	translation factor activity, nucleic acid binding	molecular_function	0.87389	1	3	1056	88	19038	1.01113e+26
GO:0015171	amino acid transmembrane transporter activity	molecular_function	0.87423	1	2	1056	64	19038	1.0112e+17
GO:0005215	transporter activity	molecular_function	0.87442	1	83	1056	1690	19038	101118367,101111268,101120935,101112385,101120348,101103792,101120350,101113095,101114004,101111412,101103311,101110267,101121071,443184,101112012,101103774,114116113,101120940,101117078,101114882,101121174,101113871,101120875,101105960,100302624,101118499,101110536,114118046,101105365,101116078,101105466,101111847,101105791,101104748,101113595,101120989,101119372,101119854,101112188,101113504,10…
GO:0030312	external encapsulating structure	cellular_component	0.87447	1	5	1056	136	19038	4.43168e+35
GO:0008199	ferric iron binding	molecular_function	0.87474	1	1	1056	35	19038	101114658
GO:0007126	meiosis	biological_process	0.87613	1	1	1056	37	19038	114115360
GO:0006778	porphyrin-containing compound metabolic process	biological_process	0.87614	1	2	1056	65	19038	1.01116e+17
GO:0006944	cellular membrane fusion	biological_process	0.87682	1	1	1056	37	19038	105608906
GO:0022857	transmembrane transporter activity	molecular_function	0.87683	1	72	1056	1480	19038	494440,101119078,101111508,101104978,101123332,114114866,114108606,101104643,101115005,101102032,101120286,105608906,101123528,101117892,101108864,121817553,100359412,101122496,101111082,101106745,101113020,101114648,101107980,101110499,101123578,101120042,101119460,101118819,101110976,101108027,101114615,101118367,101111268,101120935,101112385,101120350,101103792,101120348,101113095,101114004,10…
GO:0051129	negative regulation of cellular component organization	biological_process	0.87687	1	2	1056	64	19038	1.01108e+17
GO:0033177	proton-transporting two-sector ATPase complex, proton-transporting domain	cellular_component	0.87697	1	4	1056	113	19038	1.01123e+35
GO:0008283	cell proliferation	biological_process	0.87813	1	1	1056	37	19038	101104395
GO:0022412	cellular process involved in reproduction in multicellular organism	biological_process	0.87841	1	3	1056	90	19038	4.43469e+20
GO:0005634	nucleus	cellular_component	0.87978	1	101	1056	2030	19038	101107348,101119619,101104887,101103084,114112826,114118382,101117792,114113008,101115254,101105652,101110809,114110625,101102976,101119848,101104745,101106068,101104660,101117336,101110342,101122255,101106373,101114267,101110976,101104535,114117269,101110893,101108604,101119938,101108724,XLOC_091011,101102343,101116988,101109811,101121093,101110936,101115946,101104783,114112842,101102047,1011219…
GO:0006865	amino acid transport	biological_process	0.88051	1	2	1056	65	19038	1.01119e+17
GO:0044423	virion part	cellular_component	0.88072	1	30	1056	658	19038	101103071,105612052,XLOC_069361,101122255,101119604,101116716,100192427,100359412,101122615,101109077,101111255,121819509,114111703,105604882,105616742,106991171,101110976,105608906,101103983,105601981,494440,XLOC_063735,101121383,443519,101109765,443489,114116607,101110381,101117600,101121093
GO:0005819	spindle	cellular_component	0.88097	1	4	1056	115	19038	1.01113e+35
GO:0008134	transcription factor binding	molecular_function	0.8823	1	7	1056	183	19038	1.01108e+62
GO:0042995	cell projection	cellular_component	0.88412	1	4	1056	115	19038	1.14115e+32
GO:0016591	DNA-directed RNA polymerase II, holoenzyme	cellular_component	0.88412	1	4	1056	114	19038	1.01115e+35
GO:0035639	purine ribonucleoside triphosphate binding	molecular_function	0.88514	1	92	1056	1877	19038	101104730,100217411,101111683,101104745,114118052,101121740,101110124,101114267,101119460,101110893,101114773,101118350,101122496,101107888,101105574,100302084,101113346,101118410,101103084,101120630,101104887,101107720,101119865,101113020,100302303,101123365,114108616,105605648,101106890,101115254,101110770,101114648,101115927,101111066,101111281,101108241,101110351,101120796,101119413,100194428…
GO:0048646	anatomical structure formation involved in morphogenesis	biological_process	0.88534	1	4	1056	116	19038	1.01114e+29
GO:0043624	cellular protein complex disassembly	biological_process	0.88542	1	1	1056	38	19038	101110976
GO:0040011	locomotion	biological_process	0.88629	1	10	1056	249	19038	1.05612e+83
GO:0006397	mRNA processing	biological_process	0.88639	1	7	1056	185	19038	1.14111e+62
GO:0004129	cytochrome-c oxidase activity	molecular_function	0.88744	1	3	1056	91	19038	1.21818e+26
GO:0016675	oxidoreductase activity, acting on a heme group of donors	molecular_function	0.88744	1	3	1056	91	19038	1.21818e+26
GO:0016676	oxidoreductase activity, acting on a heme group of donors, oxygen as acceptor	molecular_function	0.88744	1	3	1056	91	19038	1.01104e+26
GO:0051258	protein polymerization	biological_process	0.88764	1	5	1056	138	19038	1.14109e+44
GO:0044772	mitotic cell cycle phase transition	biological_process	0.88804	1	1	1056	38	19038	101108076
GO:1901990	regulation of mitotic cell cycle phase transition	biological_process	0.88804	1	1	1056	38	19038	101108076
GO:0031329	regulation of cellular catabolic process	biological_process	0.88837	1	5	1056	140	19038	1.01122e+44
GO:0001883	purine nucleoside binding	molecular_function	0.88843	1	92	1056	1880	19038	101113085,101113744,101122739,100145877,101122459,100135438,101101877,101107395,101118054,101104979,101122928,101119042,101108969,101105791,101115680,101122306,101123507,101115534,101108760,101120875,101115883,101120826,101106317,101122744,101119091,101106640,101105713,101106209,101109364,101121697,101117900,100302103,101119116,101101929,105608622,101103411,100217411,101104730,114118052,101104745…
GO:0032549	ribonucleoside binding	molecular_function	0.88843	1	92	1056	1880	19038	101108969,101119042,101115534,101122306,101115680,101105791,101123507,101122459,100145877,101113744,101113085,101122739,101107395,101122928,101104979,101118054,100135438,101101877,100302103,101119116,101103411,101101929,105608622,101122744,101119091,101120875,101108760,101120826,101106317,101115883,101117900,101106209,101105713,101106640,101121697,101109364,101118410,101103084,101104887,101120630…
GO:0032550	purine ribonucleoside binding	molecular_function	0.88843	1	92	1056	1880	19038	101114518,101104473,101120032,101119938,101102259,101116317,101123008,101101915,101108399,101105117,114114866,101111508,101120116,101110351,101108241,101111066,101111281,101120796,101115927,101123321,101102131,114115360,101119413,100194428,101104887,101120630,101118410,101103084,101107888,101122496,101113346,100302084,101105574,101106890,101114648,101110770,101115254,114108616,105605648,101113020…
GO:0051701	interaction with host	biological_process	0.88888	1	8	1056	207	19038	101117537,443227,XLOC_069361,101104661,101116769,114115360,114118872,101114615
GO:0061025	membrane fusion	biological_process	0.88891	1	2	1056	67	19038	443227105608906
GO:0031023	microtubule organizing center organization	biological_process	0.88917	1	1	1056	39	19038	101121484
GO:0016791	phosphatase activity	molecular_function	0.88976	1	12	1056	296	19038	1.01112e+107
GO:0030260	entry into host cell	biological_process	0.89094	1	1	1056	39	19038	443227
GO:0044409	entry into host	biological_process	0.89094	1	1	1056	39	19038	443227
GO:0046718	viral entry into host cell	biological_process	0.89094	1	1	1056	39	19038	443227
GO:0051806	entry into cell of other organism involved in symbiotic interaction	biological_process	0.89094	1	1	1056	39	19038	443227
GO:0051828	entry into other organism involved in symbiotic interaction	biological_process	0.89094	1	1	1056	39	19038	443227
GO:0016051	carbohydrate biosynthetic process	biological_process	0.89103	1	3	1056	93	19038	1.05609e+26
[truncated: 289 more rows]

## Sheet: SFK vs CSH
GO_accession	Description	Term_type	Over_represented_pValue	Corrected_pValue	CAD_item	CAD_list	Bg_item	Bg_list	Gene_names
GO:0005126	cytokine receptor binding	molecular_function	7.1407e-13	3.2055e-09	39	1160	176	19038	101111520,492823,114112840,121818512,114113207,100135696,XLOC_135037,101104661,114112835,443403,101104401,XLOC_037452,101101901,105601948,114112837,101105632,101106400,114112883,101103872,121818657,114108665,101104151,114112842,114113008,443380,114112844,101122820,114112843,443540,114113019,106990900,114112846,105608320,101108765,105601956,114113147,114113206,114113208,101123078
GO:0006955	immune response	biological_process	1.9752e-08	4.4333e-05	42	1160	276	19038	100144425,101104661,101107641,114109630,XLOC_135037,101113217,100135696,101119545,101110634,101122559,114108665,114116130,101105860,101107908,114109639,114108855,106990117,XLOC_037452,101104401,443423,443540,443442,443441,101122820,101111694,101104866,443380,101112480,101110103,101104151,100171394,114109642,106991302,101123078,114116224,XLOC_114822,101114089,101105609,105614484,114109640,10030513…
GO:0002376	immune system process	biological_process	1.8438e-07	0.00027589	44	1160	317	19038	114108665,101106451,101105860,114116130,114108855,114109639,101107908,106990117,XLOC_037452,101104401,114112680,100144425,101107641,101104661,114109630,XLOC_135037,101113217,101119545,100135696,101110634,101122559,106991302,101123078,101114089,XLOC_114822,114116224,105614484,101105609,114109640,100305130,101108765,443423,443540,443441,443442,101111694,101104866,101122820,101112480,443380,10111010…
GO:0006952	defense response	biological_process	1.0058e-06	0.0011288	48	1160	379	19038	114112846,105608320,106990900,114113019,101102332,114112843,114112844,101105976,114112842,114113008,100137070,101102746,101111466,121818084,114113208,114113206,114113147,105601956,101119441,101106973,114112835,443403,114112118,101105214,114113207,105616794,114112840,121818512,114111034,101111520,114111053,492823,101107943,121818657,101116332,101106451,101103872,101123125,101106400,114112883,10110…
GO:0050896	response to stimulus	biological_process	1.3731e-06	0.0012328	342	1160	4527	19038	443403,XLOC_063735,101122214,101123521,101106793,101105386,101105657,101116860,101117408,114111034,114118537,101121198,121818657,105616456,114118738,101107908,101102538,101121581,101121774,114112680,101117971,105608320,443423,554257,100302067,101117248,101121889,101113294,101114097,443465,XLOC_058935,554255,101110397,101101948,101115800,105601956,101117105,101105018,101106846,101113314,100527962,…
GO:0007156	homophilic cell adhesion	biological_process	6.558e-06	0.0049065	19	1160	94	19038	1.01103e+170
GO:0006950	response to stress	biological_process	1.2837e-05	0.0082323	109	1160	1201	19038	101120630,114113206,114113147,121818084,114113208,105605808,101116988,101119002,101107532,101121559,101111752,101105976,101106808,100137070,114113008,114118023,101102332,114112843,101117600,101121486,114112846,114113019,106990900,100526788,105601948,114112837,101101901,100125354,101105632,101117092,101121766,101120591,105601988,101106400,114112883,101123079,101123125,101121481,114118024,101116332…
GO:0016337	cell-cell adhesion	biological_process	2.913e-05	0.016346	20	1160	114	19038	1.01102e+179
GO:0007155	cell adhesion	biological_process	0.00010415	0.051949	43	1160	377	19038	105601988,101105176,101102726,101102059,101117068,101116332,101113628,114114885,101115115,100526788,100125354,101112563,101102480,105605921,101117204,106991171,101122600,XLOC_135037,101103472,101107386,443001,101123120,101103233,101104029,114117899,101107101,101102761,101107462,XLOC_093086,101104745,101102453,101102310,105608322,114117993,101103720,101118903,101113020,101111652,101123632,10112337…
GO:0022610	biological adhesion	biological_process	0.00020407	0.091609	43	1160	389	19038	101119747,101113971,105605823,101123376,101111652,101123632,101113020,101118903,101103720,114117993,105608322,101102310,101102453,101104745,XLOC_093086,101107462,101102761,101107101,114117899,101103233,101104029,101123120,443001,101107386,XLOC_135037,101103472,101122600,105605921,106991171,101117204,101102480,101112563,100125354,100526788,101115115,114114885,101113628,101117068,101116332,10110205…
GO:0019882	antigen processing and presentation	biological_process	0.0002301	0.093903	10	1160	44	19038	XLOC_114822,101107908,101104866,101113217,101111694,106990117,101119545,100171394,106991302,114109630
GO:0005576	extracellular region	cellular_component	0.00025279	0.094564	140	1160	1711	19038	101109052,443403,101121647,101106841,101106373,101111520,101123403,101102085,114111034,101103872,101113628,121818657,105616456,114118738,121818018,114112680,121817693,105608320,101108435,121820202,114111225,101118819,101111721,101117598,XLOC_058935,101108714,101102644,101117614,105601956,101105214,100294614,101106681,114112840,114117771,101107197,114108665,101118240,101122183,101106400,101105176,…
GO:0005515	protein binding	molecular_function	0.0014092	0.42608	417	1160	6006	19038	101111888,101109745,554261,101113326,101117793,114118023,101120569,101106322,443380,100137070,101118468,101117600,101121676,101121814,101122957,106990900,121817538,101108448,114112846,101114198,101102184,114113208,101112475,101116924,101116726,100037663,XLOC_003276,114108740,101117567,114117770,114117899,443534,101104867,114113207,101105233,101115424,101101939,101122043,101112156,101105989,114110…
GO:0009112	nucleobase metabolic process	biological_process	0.0014237	0.42608	5	1160	15	19038	1.01117e+44
GO:0046112	nucleobase biosynthetic process	biological_process	0.0014237	0.42608	5	1160	15	19038	1.01114e+44
GO:0004488	methylenetetrahydrofolate dehydrogenase (NADP+) activity	molecular_function	0.0026961	0.75642	5	1160	17	19038	1.06991e+41
GO:0006621	protein retention in ER lumen	biological_process	0.0037498	0.81382	3	1160	6	19038	1.00146e+26
GO:0035437	maintenance of protein localization in endoplasmic reticulum	biological_process	0.0037498	0.81382	3	1160	6	19038	1.00146e+26
GO:0046923	ER retention sequence binding	molecular_function	0.0037498	0.81382	3	1160	6	19038	1.01106e+26
GO:0072595	maintenance of protein localization in organelle	biological_process	0.0037498	0.81382	3	1160	6	19038	1.01122e+26
GO:0003877	ATP adenylyltransferase activity	molecular_function	0.0038071	0.81382	2	1160	2	19038	1.01123e+17
GO:0009396	folic acid-containing compound biosynthetic process	biological_process	0.0045644	0.90835	5	1160	19	19038	1.01117e+41
GO:0005102	receptor binding	molecular_function	0.0046541	0.90835	67	1160	798	19038	114110564,114108665,101106400,114112883,101111396,101105632,101104401,101104200,XLOC_037452,101101901,105601948,100526788,114112837,443412,100294614,114112835,XLOC_135037,114113207,101106681,443534,114112840,101123078,101112475,114113208,101108765,114113206,114113147,114113019,106990900,114112846,101117600,114112843,443540,101121814,114113008,443380,101111752,101121559,101109745,101103872,1218186…
GO:0006206	pyrimidine nucleobase metabolic process	biological_process	0.0060702	0.9777	4	1160	13	19038	1.01114e+35
GO:0019856	pyrimidine nucleobase biosynthetic process	biological_process	0.0060702	0.9777	4	1160	13	19038	1.01114e+35
GO:0018836	alkylmercury lyase activity	molecular_function	0.0063462	0.9777	3	1160	7	19038	1.01104e+26
GO:0018941	organomercury metabolic process	biological_process	0.0063462	0.9777	3	1160	7	19038	1.01104e+26
GO:0018942	organometal metabolic process	biological_process	0.0063462	0.9777	3	1160	7	19038	1.01107e+26
GO:0046413	organomercury catabolic process	biological_process	0.0063462	0.9777	3	1160	7	19038	1.01107e+26
GO:0008218	bioluminescence	biological_process	0.0065339	0.9777	3	1160	7	19038	1.01122e+26
GO:0005164	tumor necrosis factor receptor binding	molecular_function	0.0071778	0.99006	5	1160	21	19038	1.01123e+41
GO:0032813	tumor necrosis factor receptor superfamily binding	molecular_function	0.0071778	0.99006	5	1160	21	19038	1.00136e+41
GO:0005643	nuclear pore	cellular_component	0.0072782	0.99006	5	1160	21	19038	101112008,101118939,101106068,XLOC_058935,101118709
GO:0007029	endoplasmic reticulum organization	biological_process	0.007569	0.99933	5	1160	21	19038	1.01102e+41
GO:0042559	pteridine-containing compound biosynthetic process	biological_process	0.0088508	1	5	1160	22	19038	1.01117e+41
GO:0046930	pore complex	cellular_component	0.0089404	1	5	1160	22	19038	101118939,101112008,101118709,101106068,XLOC_058935
GO:0005048	signal sequence binding	molecular_function	0.0095865	1	3	1160	8	19038	1.01122e+26
GO:0007031	peroxisome organization	biological_process	0.0096439	1	5	1160	22	19038	101101901,101117137,101116330,XLOC_024284,101123274
GO:0033178	proton-transporting two-sector ATPase complex, catalytic domain	cellular_component	0.011457	1	9	1160	62	19038	1.01114e+80
GO:0055086	nucleobase-containing small molecule metabolic process	biological_process	0.01204	1	30	1160	318	19038	101104433,101102696,101110313,114110625,101123332,101105646,101111561,101115005,100305130,101121731,XLOC_037452,121819509,101116406,114115304,101104979,101119197,101117092,101113998,101116640,101117432,101105064,114114873,101116528,101111683,101113871,XLOC_058935,101119865,101106080,101118367,101119460
GO:0042277	peptide binding	molecular_function	0.013744	1	3	1160	9	19038	1.01122e+26
GO:0005778	peroxisomal membrane	cellular_component	0.014853	1	4	1160	16	19038	101117137,101123274,101116330,XLOC_024284
GO:0031903	microbody membrane	cellular_component	0.014853	1	4	1160	16	19038	101116330,101123274,XLOC_024284,101117137
GO:0044438	microbody part	cellular_component	0.014853	1	4	1160	16	19038	101116330,XLOC_024284,101123274,101117137
GO:0044439	peroxisomal part	cellular_component	0.014853	1	4	1160	16	19038	101116330,101123274,XLOC_024284,101117137
GO:0006760	folic acid-containing compound metabolic process	biological_process	0.015327	1	5	1160	25	19038	4.43409e+41
GO:0004867	serine-type endopeptidase inhibitor activity	molecular_function	0.01623	1	9	1160	65	19038	1.01121e+80
GO:0006818	hydrogen transport	biological_process	0.01787	1	19	1160	186	19038	100305130,101119197,101106745,114115304,105601988,101113504,101122198,101115005,101105646,101123332,101106080,XLOC_058935,101119460,101122445,101108027,101118367,443412,106991578,101103310
GO:0015992	proton transport	biological_process	0.01787	1	19	1160	186	19038	101106745,101119197,114115304,100305130,101123332,101115005,101105646,101122198,101113504,105601988,101119460,101118367,101122445,101108027,XLOC_058935,101106080,443412,106991578,101103310
GO:0033180	proton-transporting V-type ATPase, V1 domain	cellular_component	0.018004	1	5	1160	26	19038	1.01114e+44
GO:0005788	endoplasmic reticulum lumen	cellular_component	0.019878	1	2	1160	4	19038	1.05616e+17
GO:0000002	mitochondrial genome maintenance	biological_process	0.020406	1	2	1160	4	19038	1.01121e+17
GO:0005577	fibrinogen complex	cellular_component	0.02109	1	12	1160	103	19038	101113971,100526788,101106681,XLOC_058935,101111752,101121559,100526781,101106373,101117600,101121391,443487,100294614
GO:0030168	platelet activation	biological_process	0.02109	1	12	1160	103	19038	101106373,100526781,101121559,XLOC_058935,101111752,101106681,100526788,101113971,100294614,443487,101121391,101117600
GO:0033218	amide binding	molecular_function	0.024699	1	3	1160	11	19038	1.01106e+26
GO:0016973	poly(A)+ mRNA export from nucleus	biological_process	0.025493	1	3	1160	11	19038	101112008,XLOC_058935,101118709
GO:0042558	pteridine-containing compound metabolic process	biological_process	0.028091	1	5	1160	29	19038	1.01117e+41
GO:0016503	pheromone receptor activity	molecular_function	0.029941	1	5	1160	29	19038	1.14118e+41
GO:0009507	chloroplast	cellular_component	0.030425	1	3	1160	11	19038	1.01122e+26
GO:0009536	plastid	cellular_component	0.030425	1	3	1160	11	19038	1.01122e+26
GO:0005777	peroxisome	cellular_component	0.030969	1	5	1160	29	19038	101123274,101116330,XLOC_024284,101101901,101117137
GO:0042579	microbody	cellular_component	0.030969	1	5	1160	29	19038	XLOC_024284,101116330,101123274,101101901,101117137
GO:0030896	checkpoint clamp complex	cellular_component	0.031803	1	2	1160	5	19038	443155101119002
GO:0030414	peptidase inhibitor activity	molecular_function	0.032869	1	17	1160	173	19038	1.01112e+152
GO:0061134	peptidase regulator activity	molecular_function	0.032869	1	17	1160	173	19038	1.01111e+152
GO:0030674	protein binding, bridging	molecular_function	0.033818	1	13	1160	122	19038	443487,100294614,101121391,101117600,101108186,101106373,100526781,101121559,XLOC_058935,101111752,101106681,101113971,100526788
GO:0060090	binding, bridging	molecular_function	0.033818	1	13	1160	122	19038	101108186,101117600,101121391,443487,100294614,101106681,101121559,XLOC_058935,101111752,100526788,101113971,101106373,100526781
GO:0070008	serine-type exopeptidase activity	molecular_function	0.034011	1	7	1160	51	19038	1.14109e+62
GO:0007186	G-protein coupled receptor signaling pathway	biological_process	0.035351	1	118	1160	1663	19038	114114866,114118323,105602384,101123466,XLOC_063735,101122214,101115824,101121198,114118302,114118537,101110748,101103105,101116860,100568292,101105657,101121647,XLOC_038652,101106793,101120749,101102521,101102643,101110492,114118540,101102486,101121810,101117971,101121706,101110458,114118324,121816624,121817552,114118322,101121581,100528010,101117361,114118371,101121555,100302067,101115534,11411…
GO:0030246	carbohydrate binding	molecular_function	0.036409	1	11	1160	98	19038	1.01118e+95
GO:0004930	G-protein coupled receptor activity	molecular_function	0.036613	1	104	1160	1453	19038	101120814,101107382,101106428,101118574,101105913,101102262,114118544,101112465,101112713,443111,101104643,101110102,101122628,114118251,114109578,121818828,101119373,101112071,101117137,101104907,121819696,101108047,114109605,101115839,101111363,114118318,101106169,105606440,106991540,101122438,101112052,780448,114118464,114118560,101116235,101121048,114117915,101120948,101105777,114118325,10111…
GO:0008200	ion channel inhibitor activity	molecular_function	0.038173	1	14	1160	132	19038	1.01124e+125
GO:0016248	channel inhibitor activity	molecular_function	0.038173	1	14	1160	132	19038	1.01122e+125
GO:0016646	oxidoreductase activity, acting on the CH-NH group of donors, NAD or NADP as acceptor	molecular_function	0.038342	1	5	1160	31	19038	1.01117e+41
GO:0004872	receptor activity	molecular_function	0.039177	1	123	1160	1736	19038	101105777,101120948,114118325,101113314,101105943,101115569,101102391,101106846,101103766,101117105,443412,101116643,114118366,443528,101113579,114117771,114118440,101121648,101122570,101121301,443069,114118368,101122043,101115839,114118318,101111363,101106169,105606440,114108764,106991540,101122438,101112052,780448,114118464,114118560,101116235,101121048,114117915,101112465,101112713,443111,1011…
GO:0030248	cellulose binding	molecular_function	0.03921	1	3	1160	13	19038	1.01118e+26
GO:0001775	cell activation	biological_process	0.039763	1	12	1160	113	19038	100526781,101106373,100526788,101113971,XLOC_058935,101121559,101111752,101106681,100294614,443487,101121391,101117600
GO:0030243	cellulose metabolic process	biological_process	0.045838	1	2	1160	6	19038	1.14111e+17
GO:0017053	transcriptional repressor complex	cellular_component	0.047361	1	4	1160	23	19038	1.14113e+35
GO:0005509	calcium ion binding	molecular_function	0.047696	1	45	1160	558	19038	101104745,100270715,101102310,101114767,101114841,101120620,105608322,101102184,101119694,101103720,101113020,101112321,101122194,101102449,101121889,101111652,101123632,101111411,101123376,101110374,101105527,101119747,101122536,114111225,101104912,101102059,101102726,101114786,114114885,101119604,101102480,101122600,101116580,106991171,101103472,101122993,443001,101103233,101104029,101123120,10…
GO:0005780	extrinsic to intraperoxisomal membrane	cellular_component	0.047755	1	2	1160	6	19038	XLOC_024284,101123274
GO:0031312	extrinsic to organelle membrane	cellular_component	0.047755	1	2	1160	6	19038	XLOC_024284,101123274
GO:0045033	peroxisome inheritance	biological_process	0.047755	1	2	1160	6	19038	XLOC_024284,101123274
GO:0030436	asexual sporulation	biological_process	0.048451	1	3	1160	14	19038	1.01104e+26
GO:0033176	proton-transporting V-type ATPase complex	cellular_component	0.049139	1	9	1160	79	19038	101103310,443412,101113504,105601988,101122198,101106745,101108027,101122445,XLOC_058935
GO:0008009	chemokine activity	molecular_function	0.050886	1	6	1160	45	19038	114108665,443380,101104661,XLOC_037452,101104151,101104401
GO:0042379	chemokine receptor binding	molecular_function	0.050886	1	6	1160	45	19038	114108665,101104661,443380,101104151,XLOC_037452,101104401
GO:0004857	enzyme inhibitor activity	molecular_function	0.052961	1	24	1160	279	19038	101103720,101105904,101111796,114112673,105613402,101114295,101108765,101111268,101111308,106990163,101122183,101118819,101113516,101110499,105616794,101111824,114117771,XLOC_058935,101103901,101121257,101116002,101113780,101113838,101116267
GO:0004932	mating-type factor pheromone receptor activity	molecular_function	0.055801	1	2	1160	6	19038	114117771780448
GO:0005044	scavenger receptor activity	molecular_function	0.055836	1	7	1160	56	19038	1.14114e+59
GO:0038024	cargo receptor activity	molecular_function	0.055836	1	7	1160	56	19038	1.14114e+59
GO:0007165	signal transduction	biological_process	0.056124	1	216	1160	3209	19038	114117771,101106681,101109765,105604930,114118368,101119452,101107639,101113314,101102391,101120948,114118325,443412,100294614,101117105,443528,101103766,101106846,101116235,101122281,100526788,101112052,114118560,105604590,101121048,114117915,101122928,101115374,101120808,105601988,101111363,105606440,101105176,101116078,101123079,100216436,101122438,114118024,101117137,101105527,101104907,10111…
GO:0032040	small-subunit processome	cellular_component	0.057234	1	9	1160	81	19038	1.01109e+80
GO:0044700	single organism signaling	biological_process	0.057299	1	217	1160	3227	19038	101120630,101102262,101119694,101101993,100305130,105605808,101106428,101107382,101120814,101105913,101120296,XLOC_024284,101118574,101120796,101105527,101117137,101104907,101111752,101112071,101106808,101116052,121819696,101112713,101115711,101121257,101122628,101110102,101104643,101112008,101122281,100526788,101116235,114118560,101112052,105604590,101111396,101115374,101122928,114117915,1011210…
GO:0003854	3-beta-hydroxy-delta5-steroid dehydrogenase activity	molecular_function	0.057506	1	4	1160	24	19038	101119865,101122542,XLOC_011152,101115040
GO:0016229	steroid dehydrogenase activity	molecular_function	0.057506	1	4	1160	24	19038	XLOC_011152,101115040,101119865,101122542
GO:0033764	steroid dehydrogenase activity, acting on the CH-OH group of donors, NAD or NADP as acceptor	molecular_function	0.057506	1	4	1160	24	19038	XLOC_011152,101115040,101122542,101119865
GO:0009116	nucleoside metabolic process	biological_process	0.058899	1	18	1160	198	19038	XLOC_058935,101106080,101118367,101119460,101117432,101105064,114114873,101116528,100305130,XLOC_037452,114115304,101104979,101119197,101117092,114110625,101123332,101105646,101115005
GO:1901657	glycosyl compound metabolic process	biological_process	0.058899	1	18	1160	198	19038	114115304,101104979,101117092,101119197,XLOC_037452,100305130,101105646,101115005,114110625,101123332,101118367,101119460,101106080,XLOC_058935,101116528,101105064,114114873,101117432
GO:0016645	oxidoreductase activity, acting on the CH-NH group of donors	molecular_function	0.058996	1	6	1160	46	19038	1.01117e+50
GO:0034069	aminoglycoside N-acetyltransferase activity	molecular_function	0.059946	1	1	1160	1	19038	101105386
GO:0046353	aminoglycoside 3-N-acetyltransferase activity	molecular_function	0.059946	1	1	1160	1	19038	101105386
GO:0030699	glycine reductase activity	molecular_function	0.059946	1	1	1160	1	19038	100135692
GO:0030700	glycine reductase complex	cellular_component	0.059946	1	1	1160	1	19038	100135692
GO:0046992	oxidoreductase activity, acting on X-H and Y-H to form an X-Y bond	molecular_function	0.059946	1	1	1160	1	19038	100135692
GO:0050485	oxidoreductase activity, acting on X-H and Y-H to form an X-Y bond, with a disulfide as acceptor	molecular_function	0.059946	1	1	1160	1	19038	100135692
GO:0004751	ribose-5-phosphate isomerase activity	molecular_function	0.05997	1	1	1160	1	19038	101110313
GO:0009052	pentose-phosphate shunt, non-oxidative branch	biological_process	0.05997	1	1	1160	1	19038	101110313
GO:0009249	protein lipoylation	biological_process	0.060007	1	1	1160	1	19038	101115676
GO:0018065	protein-cofactor linkage	biological_process	0.060007	1	1	1160	1	19038	101115676
GO:0005518	collagen binding	molecular_function	0.060556	1	1	1160	1	19038	100527962
GO:0006090	pyruvate metabolic process	biological_process	0.060832	1	1	1160	1	19038	101102453
GO:0009240	isopentenyl diphosphate biosynthetic process	biological_process	0.060832	1	1	1160	1	19038	101102453
GO:0016726	oxidoreductase activity, acting on CH or CH2 groups, NAD or NADP as acceptor	molecular_function	0.060832	1	1	1160	1	19038	101102453
GO:0019288	isopentenyl diphosphate biosynthetic process, mevalonate-independent pathway	biological_process	0.060832	1	1	1160	1	19038	101102453
GO:0019682	glyceraldehyde-3-phosphate metabolic process	biological_process	0.060832	1	1	1160	1	19038	101102453
GO:0046490	isopentenyl diphosphate metabolic process	biological_process	0.060832	1	1	1160	1	19038	101102453
GO:0050992	dimethylallyl diphosphate biosynthetic process	biological_process	0.060832	1	1	1160	1	19038	101102453
GO:0050993	dimethylallyl diphosphate metabolic process	biological_process	0.060832	1	1	1160	1	19038	101102453
GO:0051745	4-hydroxy-3-methylbut-2-en-1-yl diphosphate reductase activity	molecular_function	0.060832	1	1	1160	1	19038	101102453
GO:0023052	signaling	biological_process	0.061129	1	217	1160	3233	19038	101121198,101110748,114118537,101117408,101116860,101105657,101106373,101121647,101106793,101123521,105602384,XLOC_063735,101122126,101122214,101106973,101117971,101104660,101121706,121817552,121816624,101121774,101121581,105616456,101117361,114118738,101121810,XLOC_058935,114118442,101102359,101119014,443465,101107043,101114097,101113294,114118371,101121555,100302067,554257,101105411,101115800,1…
GO:0004883	glucocorticoid receptor activity	molecular_function	0.06117	1	1	1160	1	19038	443412
GO:0031958	corticosteroid receptor signaling pathway	biological_process	0.06117	1	1	1160	1	19038	443412
GO:0031960	response to corticosteroid stimulus	biological_process	0.06117	1	1	1160	1	19038	443412
GO:0042921	glucocorticoid receptor signaling pathway	biological_process	0.06117	1	1	1160	1	19038	443412
GO:0043402	glucocorticoid mediated signaling pathway	biological_process	0.06117	1	1	1160	1	19038	443412
GO:0051384	response to glucocorticoid stimulus	biological_process	0.06117	1	1	1160	1	19038	443412
GO:0071384	cellular response to corticosteroid stimulus	biological_process	0.06117	1	1	1160	1	19038	443412
GO:0071385	cellular response to glucocorticoid stimulus	biological_process	0.06117	1	1	1160	1	19038	443412
GO:0005923	tight junction	cellular_component	0.061646	1	2	1160	7	19038	1.01104e+17
GO:0043296	apical junction complex	cellular_component	0.061646	1	2	1160	7	19038	1.01119e+17
GO:0070160	occluding junction	cellular_component	0.061646	1	2	1160	7	19038	1.01119e+17
GO:0008661	1-deoxy-D-xylulose-5-phosphate synthase activity	molecular_function	0.061648	1	2	1160	7	19038	1.01107e+17
GO:0016744	transferase activity, transferring aldehyde or ketonic groups	molecular_function	0.061648	1	2	1160	7	19038	1.01107e+17
GO:0045048	protein insertion into ER membrane	biological_process	0.063013	1	2	1160	7	19038	1.01113e+17
GO:0071816	tail-anchored membrane protein insertion into ER membrane	biological_process	0.063013	1	2	1160	7	19038	1.01113e+17
GO:0005635	nuclear envelope	cellular_component	0.063283	1	5	1160	36	19038	101118939,101112008,101118709,XLOC_058935,101106068
GO:0016247	channel regulator activity	molecular_function	0.063503	1	14	1160	142	19038	1.01124e+125
GO:0045454	cell redox homeostasis	biological_process	0.064647	1	8	1160	71	19038	1.14118e+71
GO:0047474	long-chain fatty acid luciferin component ligase activity	molecular_function	0.064859	1	1	1160	1	19038	101103193
GO:0016469	proton-transporting two-sector ATPase complex	cellular_component	0.064977	1	16	1160	175	19038	101106745,114115304,101115005,101123332,105601988,101113504,101122198,101119460,101118367,101108027,101122445,101106080,XLOC_058935,106991578,443412,101103310
GO:0015988	energy coupled proton transmembrane transport, against electrochemical gradient	biological_process	0.065264	1	11	1160	109	19038	101103310,443412,106991578,101122198,101113504,105601988,101108027,101122445,101119460,101106745,XLOC_058935
GO:0015991	ATP hydrolysis coupled proton transport	biological_process	0.065264	1	11	1160	109	19038	XLOC_058935,101106745,101119460,101108027,101122445,101113504,105601988,101122198,106991578,443412,101103310
GO:0019069	viral capsid assembly	biological_process	0.067014	1	5	1160	36	19038	1.01111e+44
GO:0043044	ATP-dependent chromatin remodeling	biological_process	0.067034	1	3	1160	15	19038	1.01108e+23
GO:0046034	ATP metabolic process	biological_process	0.067089	1	9	1160	84	19038	1.01115e+80
GO:0005520	insulin-like growth factor binding	molecular_function	0.067728	1	4	1160	26	19038	4.43469e+29
GO:0044769	ATPase activity, coupled to transmembrane movement of ions, rotational mechanism	molecular_function	0.067824	1	3	1160	16	19038	1.00305e+26
GO:0031082	BLOC complex	cellular_component	0.069198	1	4	1160	26	19038	1.01117e+35
GO:0031083	BLOC-1 complex	cellular_component	0.069198	1	4	1160	26	19038	1.0111e+35
GO:0038023	signaling receptor activity	molecular_function	0.070581	1	115	1160	1657	19038	101117708,101105411,101111519,101122694,101122191,101111964,121816725,101121936,101122949,101115064,114117997,114118442,114112174,443465,101118819,101107043,114118371,101121555,101117971,101121706,114118322,114118324,121817552,121816624,100528010,101121581,101117361,101102643,101102521,101112270,101110492,101102486,101121810,114118540,101121198,114118302,114118537,101103105,101110748,101116860,10…
GO:0004888	transmembrane signaling receptor activity	molecular_function	0.072416	1	111	1160	1598	19038	101112465,101112713,443111,101104643,101110102,101122628,114109578,114118251,101119373,121818828,101112071,101117137,101104907,121819696,101108047,101103750,114109605,101120814,101107382,101106428,101118574,101105913,101102262,114118544,101117078,554326,101120948,101105777,114118325,101113314,101105943,101102391,101115569,101106846,101103766,101117105,114118366,101116643,443528,101113579,11411777…
GO:0048013	ephrin receptor signaling pathway	biological_process	0.072591	1	3	1160	15	19038	1.01123e+26
GO:0034508	centromere complex assembly	biological_process	0.072834	1	6	1160	48	19038	101121445,101108714,101104558,114112844,443403,XLOC_024284
GO:0051258	protein polymerization	biological_process	0.073691	1	13	1160	138	19038	101106373,100526781,101111752,101121559,XLOC_058935,101106681,101113971,100526788,105601868,100294614,443487,101121391,101117600
GO:0003810	protein-glutamine gamma-glutamyltransferase activity	molecular_function	0.074298	1	3	1160	16	19038	1.01107e+26
GO:0001558	regulation of cell growth	biological_process	0.075861	1	4	1160	27	19038	4.43469e+29
GO:0019838	growth factor binding	molecular_function	0.075861	1	4	1160	27	19038	4.43133e+29
GO:0051716	cellular response to stimulus	biological_process	0.076875	1	245	1160	3706	19038	121816725,101115064,101111964,101122694,101122191,101115037,101123507,101103720,114112673,105610483,101112321,101108021,114118019,101114452,101117708,101114679,101123259,101103094,101113595,101121391,101120116,100526781,101113971,101115534,114112174,101102343,101102486,443487,114118540,101110492,101122744,XLOC_011152,101114786,101102643,101102521,101115595,114118018,101116580,100528010,114118322,…
GO:0015932	nucleobase-containing compound transmembrane transporter activity	molecular_function	0.078722	1	3	1160	17	19038	1.01112e+26
GO:0004800	thyroxine 5'-deiodinase activity	molecular_function	0.079113	1	2	1160	8	19038	1.14111e+17
GO:0033227	dsRNA transport	biological_process	0.079749	1	2	1160	8	19038	1.01112e+17
GO:0051032	nucleic acid transmembrane transporter activity	molecular_function	0.079749	1	2	1160	8	19038	1.01112e+17
GO:0051033	RNA transmembrane transporter activity	molecular_function	0.079749	1	2	1160	8	19038	1.14111e+17
GO:0051205	protein insertion into membrane	biological_process	0.079796	1	3	1160	17	19038	1.01113e+26
GO:0051668	localization within membrane	biological_process	0.079796	1	3	1160	17	19038	1.01113e+26
GO:0036128	CatSper complex	cellular_component	0.080218	1	2	1160	8	19038	1.01123e+17
GO:0003729	mRNA binding	molecular_function	0.080606	1	3	1160	16	19038	1.01105e+26
GO:0018342	protein prenylation	biological_process	0.080921	1	2	1160	8	19038	101106424,XLOC_011152
GO:0097354	prenylation	biological_process	0.080921	1	2	1160	8	19038	XLOC_011152,101106424
GO:0030695	GTPase regulator activity	molecular_function	0.081087	1	19	1160	217	19038	1.01122e+170
GO:0007596	blood coagulation	biological_process	0.083037	1	12	1160	126	19038	101121391,101117600,100294614,443487,101121559,101111752,XLOC_058935,101106681,101113971,100526788,101106373,100526781
GO:0048308	organelle inheritance	biological_process	0.083056	1	3	1160	17	19038	497271,101123274,XLOC_024284
GO:0042398	cellular modified amino acid biosynthetic process	biological_process	0.083198	1	6	1160	50	19038	1.01121e+50
GO:0016903	oxidoreductase activity, acting on the aldehyde or oxo group of donors	molecular_function	0.08323	1	5	1160	39	19038	1.0111e+44
GO:0007166	cell surface receptor signaling pathway	biological_process	0.084224	1	127	1160	1865	19038	101115824,101122214,XLOC_063735,101123466,105602384,114118323,114114866,101120749,101106793,XLOC_038652,101121647,101105657,100568292,101116860,114118302,114118537,101110748,101103105,101121198,101102486,101121810,114118540,101122744,101110492,101102521,101102643,101117361,100528010,101121581,121816624,114118324,121817552,114118322,101121706,101110458,101117971,101114679,100302067,101121555,11411…
GO:0015740	C4-dicarboxylate transport	biological_process	0.084595	1	3	1160	17	19038	1.14111e+26
GO:0044380	protein localization to cytoskeleton	biological_process	0.086081	1	3	1160	16	19038	1.01116e+26
GO:0071988	protein localization to spindle pole body	biological_process	0.086081	1	3	1160	16	19038	1.01112e+26
GO:0007154	cell communication	biological_process	0.086455	1	217	1160	3270	19038	106991540,101115839,101106169,114118318,780448,114118464,114118366,100286739,101116643,101106317,101117148,114109630,101115569,101105777,443069,101105306,101122043,114118440,101105642,105601990,101122570,101121301,101105233,101121648,101113579,114117899,443534,101114841,101120620,101122306,114118544,101107139,497271,114118251,101123376,114109578,443111,101119201,101121814,101112465,101117600,1011…
GO:0016049	cell growth	biological_process	0.093512	1	4	1160	29	19038	4.43469e+29
GO:0015085	calcium ion transmembrane transporter activity	molecular_function	0.094372	1	7	1160	63	19038	4.43326e+59
GO:0040008	regulation of growth	biological_process	0.094493	1	4	1160	29	19038	4.43133e+29
GO:0018149	peptide cross-linking	biological_process	0.097779	1	3	1160	18	19038	1.01112e+26
GO:0003012	muscle system process	biological_process	0.097868	1	2	1160	9	19038	1.01106e+17
GO:0006936	muscle contraction	biological_process	0.097868	1	2	1160	9	19038	1.01106e+17
GO:0006937	regulation of muscle contraction	biological_process	0.097868	1	2	1160	9	19038	1.01118e+17
GO:0006939	smooth muscle contraction	biological_process	0.097868	1	2	1160	9	19038	1.01106e+17
GO:0006940	regulation of smooth muscle contraction	biological_process	0.097868	1	2	1160	9	19038	1.01118e+17
GO:0090257	regulation of muscle system process	biological_process	0.097868	1	2	1160	9	19038	1.01106e+17
GO:0046933	proton-transporting ATP synthase activity, rotational mechanism	molecular_function	0.098153	1	2	1160	9	19038	1.00305e+17
GO:0045202	synapse	cellular_component	0.10048	1	3	1160	17	19038	1.01112e+26
GO:0009156	ribonucleoside monophosphate biosynthetic process	biological_process	0.1006	1	3	1160	17	19038	1.01104e+26
GO:0009161	ribonucleoside monophosphate metabolic process	biological_process	0.1006	1	3	1160	17	19038	1.01105e+26
GO:0004185	serine-type carboxypeptidase activity	molecular_function	0.10071	1	2	1160	9	19038	1.01109e+17
GO:0030684	preribosome	cellular_component	0.10098	1	9	1160	91	19038	1.01112e+80
GO:0006730	one-carbon metabolic process	biological_process	0.10115	1	2	1160	9	19038	1.0111e+17
GO:0042301	phosphate ion binding	molecular_function	0.10205	1	2	1160	9	19038	1.21818e+17
GO:0019725	cellular homeostasis	biological_process	0.10333	1	14	1160	158	19038	1.14118e+125
GO:0015035	protein disulfide oxidoreductase activity	molecular_function	0.1034	1	4	1160	30	19038	1.00136e+35
GO:0015036	disulfide oxidoreductase activity	molecular_function	0.1034	1	4	1160	30	19038	1.01106e+35
GO:0005773	vacuole	cellular_component	0.10525	1	4	1160	30	19038	1.01114e+35
GO:0006338	chromatin remodeling	biological_process	0.10557	1	4	1160	29	19038	1.01108e+32
GO:0009124	nucleoside monophosphate biosynthetic process	biological_process	0.11352	1	3	1160	18	19038	1.01105e+26
GO:0001664	G-protein coupled receptor binding	molecular_function	0.11472	1	7	1160	68	19038	114108665,101104661,443380,XLOC_037452,101109745,101104151,101104401
GO:0009117	nucleotide metabolic process	biological_process	0.11486	1	21	1160	259	19038	101110313,101123332,101105646,101115005,101104433,101102696,121819509,101116406,114115304,101119197,101104979,101117092,100305130,101111683,101116640,101117432,101118367,101119460,XLOC_058935,101119865,101106080
GO:0031225	anchored to membrane	cellular_component	0.11594	1	3	1160	20	19038	1.01106e+26
GO:0018759	methenyltetrahydromethanopterin cyclohydrolase activity	molecular_function	0.1163	1	1	1160	2	19038	101108788
GO:0050290	sphingomyelin phosphodiesterase D activity	molecular_function	0.1163	1	1	1160	2	19038	101119587
GO:0030597	RNA glycosylase activity	molecular_function	0.1163	1	1	1160	2	19038	101102200
GO:0030598	rRNA N-glycosylase activity	molecular_function	0.1163	1	1	1160	2	19038	101102200
GO:0004618	phosphoglycerate kinase activity	molecular_function	0.1163	1	1	1160	2	19038	100216440
GO:0004089	carbonate dehydratase activity	molecular_function	0.11631	1	1	1160	2	19038	101106373
GO:0004637	phosphoribosylamine-glycine ligase activity	molecular_function	0.11631	1	1	1160	2	19038	101121731
GO:0006144	purine nucleobase metabolic process	biological_process	0.11631	1	1	1160	2	19038	101121731
GO:0009113	purine nucleobase biosynthetic process	biological_process	0.11631	1	1	1160	2	19038	101121731
GO:0005335	serotonin:sodium symporter activity	molecular_function	0.11632	1	1	1160	2	19038	443491
GO:0034969	histone arginine methylation	biological_process	0.11633	1	1	1160	2	19038	101116921
GO:0043985	histone H4-R3 methylation	biological_process	0.11633	1	1	1160	2	19038	101116921
GO:0009002	serine-type D-Ala-D-Ala carboxypeptidase activity	molecular_function	0.11635	1	1	1160	2	19038	101108974
GO:0016759	cellulose synthase activity	molecular_function	0.11636	1	1	1160	2	19038	114111226
GO:0016760	cellulose synthase (UDP-forming) activity	molecular_function	0.11636	1	1	1160	2	19038	114111226
GO:0030244	cellulose biosynthetic process	biological_process	0.11636	1	1	1160	2	19038	114111226
GO:0004590	orotidine-5'-phosphate decarboxylase activity	molecular_function	0.11639	1	1	1160	2	19038	101116528
GO:0006207	'de novo' pyrimidine nucleobase biosynthetic process	biological_process	0.11639	1	1	1160	2	19038	101116528
GO:0004375	glycine dehydrogenase (decarboxylating) activity	molecular_function	0.11686	1	1	1160	2	19038	101117476
GO:0006546	glycine catabolic process	biological_process	0.11686	1	1	1160	2	19038	101117476
GO:0009071	serine family amino acid catabolic process	biological_process	0.11686	1	1	1160	2	19038	101117476
GO:0016642	oxidoreductase activity, acting on the CH-NH2 group of donors, disulfide as acceptor	molecular_function	0.11686	1	1	1160	2	19038	101117476
GO:0015672	monovalent inorganic cation transport	biological_process	0.11702	1	33	1160	434	19038	114115304,101119197,101106745,100305130,101119694,105605903,101109660,101123332,101105646,101115005,101122198,101123578,101123528,101118367,101111508,XLOC_058935,101106080,101106197,101109745,101117137,101113595,101103310,114115283,106991578,100302624,101105111,105601988,101113504,101108027,101122445,101119460,101118054,443412
GO:0000229	cytoplasmic chromosome	cellular_component	0.11735	1	1	1160	2	19038	101103644
GO:0000262	mitochondrial chromosome	cellular_component	0.11735	1	1	1160	2	19038	101103644
GO:0042645	mitochondrial nucleoid	cellular_component	0.11735	1	1	1160	2	19038	101103644
GO:0006403	RNA localization	biological_process	0.11739	1	7	1160	68	19038	101112008,101111901,101111678,101118709,XLOC_058935,114111226,497271
GO:0050657	nucleic acid transport	biological_process	0.11739	1	7	1160	68	19038	114111226,497271,101118709,XLOC_058935,101111678,101112008,101111901
GO:0050658	RNA transport	biological_process	0.11739	1	7	1160	68	19038	101111678,101112008,101111901,114111226,497271,101118709,XLOC_058935
GO:0051236	establishment of RNA localization	biological_process	0.11739	1	7	1160	68	19038	114111226,497271,XLOC_058935,101118709,101111678,101111901,101112008
GO:0015996	chlorophyll catabolic process	biological_process	0.11756	1	2	1160	10	19038	1.01116e+17
GO:0047746	chlorophyllase activity	molecular_function	0.11756	1	2	1160	10	19038	1.01116e+17
GO:0004169	dolichyl-phosphate-mannose-protein mannosyltransferase activity	molecular_function	0.11769	1	1	1160	2	19038	101107630
GO:0035268	protein mannosylation	biological_process	0.11769	1	1	1160	2	19038	101107630
GO:0035269	protein O-linked mannosylation	biological_process	0.11769	1	1	1160	2	19038	101107630
GO:0004525	ribonuclease III activity	molecular_function	0.11782	1	1	1160	2	19038	101115827
GO:0071107	response to parathyroid hormone stimulus	biological_process	0.11792	1	2	1160	10	19038	1.01123e+17
GO:0000270	peptidoglycan metabolic process	biological_process	0.11793	1	2	1160	10	19038	XLOC_135037,101121731
GO:0016556	mRNA modification	biological_process	0.12021	1	1	1160	2	19038	101122066
GO:0080009	mRNA methylation	biological_process	0.12021	1	1	1160	2	19038	101122066
GO:0006694	steroid biosynthetic process	biological_process	0.12026	1	4	1160	31	19038	101122542,101119865,XLOC_011152,101115040
GO:0000977	RNA polymerase II regulatory region sequence-specific DNA binding	molecular_function	0.12029	1	1	1160	2	19038	101107196
GO:0000978	RNA polymerase II core promoter proximal region sequence-specific DNA binding	molecular_function	0.12029	1	1	1160	2	19038	101107196
GO:0000982	RNA polymerase II core promoter proximal region sequence-specific DNA binding transcription factor activity	molecular_function	0.12029	1	1	1160	2	19038	101107196
GO:0000987	core promoter proximal region sequence-specific DNA binding	molecular_function	0.12029	1	1	1160	2	19038	101107196
GO:0001012	RNA polymerase II regulatory region DNA binding	molecular_function	0.12029	1	1	1160	2	19038	101107196
GO:0001159	core promoter proximal region DNA binding	molecular_function	0.12029	1	1	1160	2	19038	101107196
GO:0016877	ligase activity, forming carbon-sulfur bonds	molecular_function	0.12097	1	1	1160	2	19038	101103193
GO:0016878	acid-thiol ligase activity	molecular_function	0.12097	1	1	1160	2	19038	101103193
GO:0031647	regulation of protein stability	biological_process	0.12202	1	2	1160	10	19038	1.01115e+17
GO:0050821	protein stabilization	biological_process	0.12202	1	2	1160	10	19038	1.01115e+17
GO:0019067	viral assembly, maturation, egress, and release	biological_process	0.12412	1	12	1160	136	19038	1.14118e+107
GO:0004871	signal transducer activity	molecular_function	0.12448	1	124	1160	1847	19038	114118318,101111363,101106169,105606440,101115839,101122438,106991540,101116235,780448,114118464,114118560,101112052,114117915,101121048,101115569,101102391,101105943,101113314,114118325,101105777,101120948,443528,114118366,443412,101117105,101116643,101103766,101106846,101106317,114117771,101113579,101122043,114118368,443069,101122570,101121648,101121301,101119452,114118440,101106428,101107382,1…
GO:0060089	molecular transducer activity	molecular_function	0.12448	1	124	1160	1847	19038	101105411,101117708,101111519,101122191,101122694,121816725,101121936,101122949,101115064,101111964,101115534,114118442,114112174,114117997,101107043,101114097,101118819,443465,101121555,100302067,114118371,121816624,114118324,121817552,114118322,101117971,101121706,101117361,100528010,101121581,101102521,101102643,101112270,101102486,114118540,101121810,101110492,101116860,101121198,114118302,10…
GO:0019829	cation-transporting ATPase activity	molecular_function	0.12526	1	4	1160	32	19038	1.01115e+35
GO:0042625	ATPase activity, coupled to transmembrane movement of ions	molecular_function	0.12526	1	4	1160	32	19038	1.00305e+35
GO:0016757	transferase activity, transferring glycosyl groups	molecular_function	0.12539	1	27	1160	346	19038	101118027,101107639,101114008,101107465,101103203,101117764,101103907,101109477,101116640,101114374,101102585,101107908,101118189,101121025,XLOC_037452,114111226,554320,101118709,114112219,101106554,101107630,121817369,101115676,114115345,101102696,101117163,100270715
GO:0005779	integral to peroxisomal membrane	cellular_component	0.12676	1	2	1160	10	19038	1.01116e+17
GO:0031231	intrinsic to peroxisomal membrane	cellular_component	0.12676	1	2	1160	10	19038	1.01116e+17
GO:0005930	axoneme	cellular_component	0.12681	1	1	1160	2	19038	101123125
GO:0030990	intraflagellar transport particle	cellular_component	0.12681	1	1	1160	2	19038	101123125
GO:0030991	intraflagellar transport particle A	cellular_component	0.12681	1	1	1160	2	19038	101123125
GO:0044447	axoneme part	cellular_component	0.12681	1	1	1160	2	19038	101123125
GO:0005615	extracellular space	cellular_component	0.13065	1	17	1160	209	19038	101111268,443487,114112680,100526788,101114123,101117600,101121391,114109630,100294614,101106681,101111752,XLOC_058935,101121559,101102644,101113971,101106373,100526781
GO:0015931	nucleobase-containing compound transport	biological_process	0.13122	1	7	1160	70	19038	101111678,101112008,101111901,497271,114111226,101118709,XLOC_058935
GO:0005262	calcium channel activity	molecular_function	0.1326	1	6	1160	56	19038	1.01105e+50
GO:0005976	polysaccharide metabolic process	biological_process	0.1345	1	5	1160	44	19038	1.01113e+44
GO:0006336	DNA replication-independent nucleosome assembly	biological_process	0.13808	1	2	1160	10	19038	443403114112844
GO:0031055	chromatin remodeling at centromere	biological_process	0.13808	1	2	1160	10	19038	443403114112844
GO:0034080	CENP-A containing nucleosome assembly at centromere	biological_process	0.13808	1	2	1160	10	19038	114112844443403
GO:0034724	DNA replication-independent nucleosome organization	biological_process	0.13808	1	2	1160	10	19038	114112844443403
GO:0043486	histone exchange	biological_process	0.13808	1	2	1160	10	19038	114112844443403
GO:0072528	pyrimidine-containing compound biosynthetic process	biological_process	0.13961	1	5	1160	45	19038	1.01117e+44
GO:0051273	beta-glucan metabolic process	biological_process	0.13998	1	2	1160	11	19038	1.01113e+17
GO:0019722	calcium-mediated signaling	biological_process	0.14045	1	2	1160	11	19038	1.01106e+17
GO:0019932	second-messenger-mediated signaling	biological_process	0.14045	1	2	1160	11	19038	1.01115e+17
GO:0006900	membrane budding	biological_process	0.14093	1	2	1160	11	19038	114111619,XLOC_024284
GO:0006901	vesicle coating	biological_process	0.14093	1	2	1160	11	19038	XLOC_024284,114111619
GO:0007212	dopamine receptor signaling pathway	biological_process	0.14093	1	2	1160	11	19038	114111619,XLOC_024284
GO:0030276	clathrin binding	molecular_function	0.14093	1	2	1160	11	19038	XLOC_024284,114111619
GO:0032051	clathrin light chain binding	molecular_function	0.14093	1	2	1160	11	19038	XLOC_024284,114111619
GO:0048268	clathrin coat assembly	biological_process	0.14093	1	2	1160	11	19038	114111619,XLOC_024284
GO:0000272	polysaccharide catabolic process	biological_process	0.14129	1	2	1160	11	19038	1.01109e+17
GO:0005096	GTPase activator activity	molecular_function	0.1417	1	8	1160	84	19038	1.01112e+71
GO:0009144	purine nucleoside triphosphate metabolic process	biological_process	0.14234	1	10	1160	112	19038	1.01106e+89
GO:0009199	ribonucleoside triphosphate metabolic process	biological_process	0.14234	1	10	1160	112	19038	1.01119e+89
GO:0009205	purine ribonucleoside triphosphate metabolic process	biological_process	0.14234	1	10	1160	112	19038	1.01117e+89
GO:0009141	nucleoside triphosphate metabolic process	biological_process	0.14239	1	11	1160	126	19038	1.01106e+98
GO:0006753	nucleoside phosphate metabolic process	biological_process	0.14246	1	21	1160	267	19038	101119460,101118367,101106080,101119865,XLOC_058935,101111683,101117432,101116640,101104979,101119197,101117092,114115304,101116406,121819509,100305130,101115005,101105646,101123332,101110313,101102696,101104433
GO:0019068	virion assembly	biological_process	0.14279	1	10	1160	112	19038	1.01107e+89
GO:0072521	purine-containing compound metabolic process	biological_process	0.14298	1	16	1160	195	19038	100305130,101121731,114115304,101119197,101104979,101104433,101123332,101105646,101115005,XLOC_058935,101106080,101118367,101119460,101116640,101117432,101111683
GO:0008318	protein prenyltransferase activity	molecular_function	0.1438	1	2	1160	11	19038	XLOC_011152,101106424
GO:0009719	response to endogenous stimulus	biological_process	0.1478	1	9	1160	98	19038	1.01122e+77
GO:0004659	prenyltransferase activity	molecular_function	0.14844	1	3	1160	22	19038	101111964,XLOC_011152,101106424
GO:0016799	hydrolase activity, hydrolyzing N-glycosyl compounds	molecular_function	0.14905	1	3	1160	22	19038	1.01104e+26
GO:0030234	enzyme regulator activity	molecular_function	0.15098	1	44	1160	606	19038	105613402,101122281,101115374,101105904,101122542,101122183,106990163,100216436,101111268,101103901,114117899,101109765,114117771,105616794,101105233,101110499,101113838,101116267,101111683,101106973,101101993,101108765,101114295,101120630,114112673,101111796,101103720,101122198,XLOC_003276,101120620,101111308,XLOC_058935,101111824,101113294,100526781,101116052,101106808,101118819,101113516,10111…
GO:0006732	coenzyme metabolic process	biological_process	0.15356	1	9	1160	100	19038	1.01117e+77
GO:0006720	isoprenoid metabolic process	biological_process	0.15438	1	5	1160	47	19038	1.01118e+44
GO:0008299	isoprenoid biosynthetic process	biological_process	0.15438	1	5	1160	47	19038	1.01102e+44
GO:0006974	response to DNA damage stimulus	biological_process	0.15491	1	40	1160	559	19038	101121486,443155,121820019,101121889,101117248,114118023,101119002,101107532,101119014,101102359,101123507,105605808,114112673,105610483,101101948,101116988,114118019,101112758,101123503,114109364,101105018,100527962,101104819,101104015,101123380,101116521,100037690,105601990,105604930,101102466,XLOC_011152,101121481,101102343,114118024,101123079,105601988,101115595,101121766,114118018,101117092
GO:0009123	nucleoside monophosphate metabolic process	biological_process	0.15587	1	3	1160	21	19038	1.0112e+26
GO:0019033	viral tegument	cellular_component	0.15615	1	3	1160	22	19038	4.9444e+23
GO:0016929	SUMO-specific protease activity	molecular_function	0.15698	1	3	1160	23	19038	1.14112e+26
GO:0032183	SUMO binding	molecular_function	0.15698	1	3	1160	23	19038	1.01112e+26
GO:0070122	isopeptidase activity	molecular_function	0.15698	1	3	1160	23	19038	1.14112e+26
GO:0070138	small conjugating protein-specific isopeptidase activity	molecular_function	0.15698	1	3	1160	23	19038	1.14112e+26
GO:0070140	SUMO-specific isopeptidase activity	molecular_function	0.15698	1	3	1160	23	19038	1.01114e+26
GO:0060589	nucleoside-triphosphatase regulator activity	molecular_function	0.15729	1	21	1160	267	19038	101115374,101122281,101120630,101101993,100216436,101120620,XLOC_003276,101122198,101122542,101116052,101106808,101113294,100526781,101105233,101109765,XLOC_058935,114117899,101121257,101123259,101111683,101116986
GO:0016709	oxidoreductase activity, acting on paired donors, with incorporation or reduction of molecular oxygen, NAD(P)H as one donor, and incorporation of one atom of oxygen	molecular_function	0.1575	1	3	1160	23	19038	1.0111e+20
GO:0042592	homeostatic process	biological_process	0.15829	1	15	1160	184	19038	1.01109e+134
GO:0000077	DNA damage checkpoint	biological_process	0.15946	1	2	1160	12	19038	443155101119002
GO:0031570	DNA integrity checkpoint	biological_process	0.15946	1	2	1160	12	19038	443155101119002
GO:0016624	oxidoreductase activity, acting on the aldehyde or oxo group of donors, disulfide as acceptor	molecular_function	0.15964	1	2	1160	12	19038	1.0111e+17
GO:0004864	protein phosphatase inhibitor activity	molecular_function	0.15984	1	2	1160	12	19038	1.0111e+17
GO:0019212	phosphatase inhibitor activity	molecular_function	0.15984	1	2	1160	12	19038	1.0111e+17
GO:0051287	NAD binding	molecular_function	0.16053	1	9	1160	102	19038	4.43409e+77
GO:0044036	cell wall macromolecule metabolic process	biological_process	0.1619	1	2	1160	12	19038	XLOC_135037,101108572
GO:0016614	oxidoreductase activity, acting on CH-OH group of donors	molecular_function	0.16272	1	13	1160	158	19038	101122542,XLOC_011152,101107641,101119597,101114124,101115040,114115283,101118054,101119865,105605903,443409,101111396,101110890
GO:0007266	Rho protein signal transduction	biological_process	0.16287	1	7	1160	72	19038	1.01102e+62
GO:0035023	regulation of Rho protein signal transduction	biological_process	0.16287	1	7	1160	72	19038	1.0111e+62
GO:0016616	oxidoreductase activity, acting on the CH-OH group of donors, NAD or NADP as acceptor	molecular_function	0.16456	1	12	1160	144	19038	114115283,101118054,101107641,XLOC_011152,101119597,101114124,101115040,101122542,101110890,443409,105605903,101119865
GO:0051056	regulation of small GTPase mediated signal transduction	biological_process	0.16546	1	9	1160	99	19038	1.01113e+80
GO:0051726	regulation of cell cycle	biological_process	0.16595	1	11	1160	130	19038	1.0111e+95
GO:0019855	calcium channel inhibitor activity	molecular_function	0.16641	1	3	1160	23	19038	1.01112e+26
GO:0007599	hemostasis	biological_process	0.16826	1	12	1160	144	19038	101117600,101121391,443487,100294614,100526788,101113971,101106681,101111752,101121559,XLOC_058935,100526781,101106373
GO:0050817	coagulation	biological_process	0.16826	1	12	1160	144	19038	100526781,101106373,101113971,100526788,101111752,101121559,XLOC_058935,101106681,100294614,443487,101121391,101117600
GO:0050878	regulation of body fluid levels	biological_process	0.16826	1	12	1160	144	19038	101106681,XLOC_058935,101121559,101111752,101113971,100526788,101106373,100526781,101117600,101121391,100294614,443487
GO:0009259	ribonucleotide metabolic process	biological_process	0.16854	1	14	1160	171	19038	1.01106e+125
GO:0019693	ribose phosphate metabolic process	biological_process	0.16854	1	14	1160	171	19038	1.01117e+125
GO:0044456	synapse part	cellular_component	0.16894	1	1	1160	2	19038	101105111
GO:0048786	presynaptic active zone	cellular_component	0.16894	1	1	1160	2	19038	101105111
GO:0097458	neuron part	cellular_component	0.16894	1	1	1160	2	19038	101105111
GO:0043085	positive regulation of catalytic activity	biological_process	0.16901	1	4	1160	35	19038	1.01102e+35
GO:0044093	positive regulation of molecular function	biological_process	0.16901	1	4	1160	35	19038	1.01102e+35
GO:0000086	G2/M transition of mitotic cell cycle	biological_process	0.16928	1	1	1160	3	19038	101110255
GO:0008942	nitrite reductase [NAD(P)H] activity	molecular_function	0.16928	1	1	1160	3	19038	101118054
GO:0010389	regulation of G2/M transition of mitotic cell cycle	biological_process	0.16928	1	1	1160	3	19038	101110255
GO:0010972	negative regulation of G2/M transition of mitotic cell cycle	biological_process	0.16928	1	1	1160	3	19038	101110255
GO:0030336	negative regulation of cell migration	biological_process	0.16928	1	1	1160	3	19038	101110255
GO:0045930	negative regulation of mitotic cell cycle	biological_process	0.16928	1	1	1160	3	19038	101110255
GO:0046857	oxidoreductase activity, acting on other nitrogenous compounds as donors, with NAD or NADP as acceptor	molecular_function	0.16928	1	1	1160	3	19038	101118054
GO:0004019	adenylosuccinate synthase activity	molecular_function	0.16929	1	1	1160	3	19038	101116640
GO:0004866	endopeptidase inhibitor activity	molecular_function	0.16932	1	11	1160	131	19038	1.01114e+98
GO:0061135	endopeptidase regulator activity	molecular_function	0.16932	1	11	1160	131	19038	1.01114e+98
GO:0004345	glucose-6-phosphate dehydrogenase activity	molecular_function	0.16932	1	1	1160	3	19038	101114124
GO:0015098	molybdate ion transmembrane transporter activity	molecular_function	0.16947	1	1	1160	3	19038	101108195
GO:0015689	molybdate ion transport	biological_process	0.16947	1	1	1160	3	19038	101108195
GO:0004817	cysteine-tRNA ligase activity	molecular_function	0.16969	1	1	1160	3	19038	101112906
GO:0006423	cysteinyl-tRNA aminoacylation	biological_process	0.16969	1	1	1160	3	19038	101112906
GO:0046999	regulation of conjugation	biological_process	0.1701	1	1	1160	3	19038	106991578
GO:0034450	ubiquitin-ubiquitin ligase activity	molecular_function	0.1704	1	1	1160	3	19038	101113088
GO:0000790	nuclear chromatin	cellular_component	0.17041	1	1	1160	3	19038	101106673
GO:0031011	Ino80 complex	cellular_component	0.17041	1	1	1160	3	19038	101106673
GO:0097346	INO80-type complex	cellular_component	0.17041	1	1	1160	3	19038	101106673
GO:0006721	terpenoid metabolic process	biological_process	0.17049	1	4	1160	36	19038	1.01118e+35
GO:0016114	terpenoid biosynthetic process	biological_process	0.17049	1	4	1160	36	19038	1.01107e+35
GO:0006081	cellular aldehyde metabolic process	biological_process	0.17061	1	1	1160	3	19038	101102453
GO:0019089	transmission of virus	biological_process	0.17085	1	1	1160	3	19038	101107197
GO:0044007	dissemination or transmission of symbiont from host	biological_process	0.17085	1	1	1160	3	19038	101107197
GO:0051821	dissemination or transmission of organism from other organism involved in symbiotic interaction	biological_process	0.17085	1	1	1160	3	19038	101107197
GO:0015066	alpha-amylase inhibitor activity	molecular_function	0.17141	1	1	1160	3	19038	101108765
GO:0018537	coenzyme F420-dependent N5,N10-methenyltetrahydromethanopterin reductase activity	molecular_function	0.17146	1	1	1160	3	19038	101107482
GO:0046995	oxidoreductase activity, acting on hydrogen as donor, with other known acceptors	molecular_function	0.17146	1	1	1160	3	19038	101107482
GO:0047068	N5,N10-methenyltetrahydromethanopterin hydrogenase activity	molecular_function	0.17146	1	1	1160	3	19038	101107482
GO:0005085	guanyl-nucleotide exchange factor activity	molecular_function	0.17149	1	11	1160	127	19038	1.01121e+98
GO:0009982	pseudouridine synthase activity	molecular_function	0.17225	1	3	1160	24	19038	1.01113e+26
GO:0000702	oxidized base lesion DNA N-glycosylase activity	molecular_function	0.17256	1	1	1160	3	19038	101104015
GO:0008534	oxidized purine nucleobase lesion DNA N-glycosylase activity	molecular_function	0.17256	1	1	1160	3	19038	101104015
GO:0016812	hydrolase activity, acting on carbon-nitrogen (but not peptide) bonds, in cyclic amides	molecular_function	0.17345	1	1	1160	3	19038	101107196
GO:0000221	vacuolar proton-transporting V-type ATPase, V1 domain	cellular_component	0.17348	1	3	1160	24	19038	1.01114e+26
GO:0016471	vacuolar proton-transporting V-type ATPase complex	cellular_component	0.17348	1	3	1160	24	19038	1.01114e+26
GO:0009617	response to bacterium	biological_process	0.17364	1	7	1160	75	19038	1.01123e+62
GO:0042742	defense response to bacterium	biological_process	0.17364	1	7	1160	75	19038	1.01123e+62
GO:0009061	anaerobic respiration	biological_process	0.17373	1	3	1160	24	19038	1.01103e+26
GO:0015948	methanogenesis	biological_process	0.17373	1	3	1160	24	19038	1.01103e+26
GO:0015975	energy derivation by oxidation of reduced inorganic compounds	biological_process	0.17373	1	3	1160	24	19038	1.01107e+26
GO:0043447	alkane biosynthetic process	biological_process	0.17373	1	3	1160	24	19038	1.01103e+26
GO:0009725	response to hormone stimulus	biological_process	0.17427	1	8	1160	88	19038	1.01105e+68
GO:0010383	cell wall polysaccharide metabolic process	biological_process	0.17452	1	1	1160	3	19038	101108572
GO:0010410	hemicellulose metabolic process	biological_process	0.17452	1	1	1160	3	19038	101108572
GO:0045491	xylan metabolic process	biological_process	0.17452	1	1	1160	3	19038	101108572
GO:0045493	xylan catabolic process	biological_process	0.17452	1	1	1160	3	19038	101108572
GO:0046559	alpha-glucuronidase activity	molecular_function	0.17452	1	1	1160	3	19038	101108572
GO:0007265	Ras protein signal transduction	biological_process	0.17551	1	8	1160	87	19038	1.01105e+71
GO:0046578	regulation of Ras protein signal transduction	biological_process	0.17551	1	8	1160	87	19038	1.01105e+71
GO:0004161	dimethylallyltranstransferase activity	molecular_function	0.17671	1	1	1160	3	19038	101111964
GO:0019031	viral envelope	cellular_component	0.17807	1	22	1160	284	19038	101109765,101111752,XLOC_058935,101104867,101110526,105603811,100526781,100141297,101123303,101117600,101115966,100294614,100141296,100526788,101113088,121819509,105604590,100526782,101117614,121818722,443487,101107197
GO:0036338	viral membrane	cellular_component	0.17807	1	22	1160	284	19038	101104867,101111752,XLOC_058935,101109765,105603811,100526781,101110526,100141297,101117600,101123303,101115966,100294614,101113088,100526788,100141296,105604590,121819509,121818722,100526782,101117614,443487,101107197
GO:0008113	peptide-methionine (S)-S-oxide reductase activity	molecular_function	0.18101	1	1	1160	3	19038	101117221
GO:0034457	Mpp10 complex	cellular_component	0.18158	1	2	1160	13	19038	1.01109e+17
GO:0034622	cellular macromolecular complex assembly	biological_process	0.18285	1	27	1160	370	19038	XLOC_024284,105601868,101111964,443487,101104558,101101940,101118939,101103644,101121445,100526788,100294614,101114679,443403,101117600,101121391,XLOC_135037,101106373,114111619,100526781,114112844,114111225,101106681,101108714,101121559,101111752,XLOC_058935,101113971
GO:0015103	inorganic anion transmembrane transporter activity	molecular_function	0.18325	1	4	1160	37	19038	1.14118e+35
GO:0006163	purine nucleotide metabolic process	biological_process	0.18358	1	15	1160	189	19038	101111683,101123332,101105646,101115005,101116640,101104433,101117432,101118367,101119460,114115304,101119197,101104979,XLOC_058935,100305130,101106080
GO:0022607	cellular component assembly	biological_process	0.18367	1	54	1160	783	19038	101107052,105603509,101106373,101106754,101109765,101106681,101117176,443403,100294614,XLOC_135037,101104025,101115572,101111396,101102499,114118018,101118939,101122281,100526788,101121445,101111928,101103644,443487,101104558,121817369,101118623,101106451,101101940,114111225,100526781,114112844,114111619,101109312,101113971,XLOC_058935,101121559,101111752,101108714,101115966,101114679,106991578,1…
GO:0005213	structural constituent of chorion	molecular_function	0.18402	1	7	1160	76	19038	1.01108e+56
GO:0007292	female gamete generation	biological_process	0.18402	1	7	1160	76	19038	4.43168e+56
GO:0007304	chorion-containing eggshell formation	biological_process	0.18402	1	7	1160	76	19038	1.01108e+56
GO:0030703	eggshell formation	biological_process	0.18402	1	7	1160	76	19038	1.01108e+56
GO:0030707	ovarian follicle cell development	biological_process	0.18402	1	7	1160	76	19038	1.01108e+56
GO:0048477	oogenesis	biological_process	0.18402	1	7	1160	76	19038	1.01108e+56
GO:0042157	lipoprotein metabolic process	biological_process	0.18568	1	8	1160	87	19038	101115676,101117614,101106373,101107723,105604590,XLOC_058935,100125354,101107611
GO:0031224	intrinsic to membrane	cellular_component	0.18582	1	242	1160	3771	19038	101105411,114115302,101122949,101121936,101108981,101111901,101104388,101122198,101118819,101107043,101111721,443465,101106197,114118442,101108714,XLOC_058935,101103310,101121555,100135438,114118371,101106425,101105365,101102538,121818018,101117361,101107723,XLOC_024267,101121581,121817552,101117346,121816624,101117971,101121706,101110785,101121810,101113628,101102488,101103681,101113286,10110679…
GO:0005891	voltage-gated calcium channel complex	cellular_component	0.18872	1	2	1160	13	19038	1.01123e+17
GO:0034704	calcium channel complex	cellular_component	0.18872	1	2	1160	13	19038	1.01123e+17
GO:0005540	hyaluronic acid binding	molecular_function	0.18879	1	3	1160	25	19038	1.01107e+23
GO:0015947	methane metabolic process	biological_process	0.18908	1	3	1160	25	19038	1.01103e+26
GO:0043446	cellular alkane metabolic process	biological_process	0.18908	1	3	1160	25	19038	1.01103e+26
GO:0008146	sulfotransferase activity	molecular_function	0.18955	1	6	1160	63	19038	1.01123e+53
GO:0044463	cell projection part	cellular_component	0.19031	1	3	1160	25	19038	1.01123e+26
GO:0005125	cytokine activity	molecular_function	0.1904	1	7	1160	78	19038	101104661,443380,114108665,101104200,101104401,101104151,XLOC_037452
GO:0016782	transferase activity, transferring sulfur-containing groups	molecular_function	0.19319	1	7	1160	77	19038	1.01123e+62
GO:0043233	organelle lumen	cellular_component	0.19327	1	37	1160	518	19038	114113147,101118709,114113264,101110936,105616092,101119002,101102272,101119870,101108714,101116052,114112842,114113008,101104487,101114511,443155,101120683,101119854,101104660,101103644,114108856,101110342,101108700,101120980,114116130,101105176,101109807,101119619,101102976,101106673,101111979,101108511,114113207,101104025,105610459,101121053,101113762,443469
GO:0070013	intracellular organelle lumen	cellular_component	0.19327	1	37	1160	518	19038	105610459,101113762,101121053,443469,101104025,101106673,114113207,101108511,101111979,101102976,101109807,101119619,101120980,101108700,101105176,114116130,114108856,101110342,101120683,101104660,101103644,101119854,101114511,443155,101104487,101116052,114112842,114113008,101102272,101119870,101119002,101108714,105616092,101110936,114113264,114113147,101118709
GO:0006230	TMP biosynthetic process	biological_process	0.20022	1	1	1160	3	19038	101119865
GO:0009173	pyrimidine ribonucleoside monophosphate metabolic process	biological_process	0.20022	1	1	1160	3	19038	101119865
GO:0009174	pyrimidine ribonucleoside monophosphate biosynthetic process	biological_process	0.20022	1	1	1160	3	19038	101119865
GO:0046044	TMP metabolic process	biological_process	0.20022	1	1	1160	3	19038	101119865
GO:0033365	protein localization to organelle	biological_process	0.20052	1	18	1160	237	19038	1.01122e+158
GO:0015556	C4-dicarboxylate transmembrane transporter activity	molecular_function	0.20057	1	1	1160	3	19038	101102752
GO:0003674	molecular_function	molecular_function	0.20162	1	1030	1160	16731	19038	101102696,101123336,105602047,105603785,101123332,101106505,100141296,554326,101116336,443540,101106066,101108311,101121486,101116756,114113019,101106080,101104907,101112786,101112071,101111752,443184,101111082,121818722,106990163,101107630,121817369,101106451,101104401,101112052,443528,105610459,101103766,101110634,101106681,101108027,101116521,101106355,101122949,114108769,101105411,554320,1011…
GO:0006913	nucleocytoplasmic transport	biological_process	0.20174	1	13	1160	165	19038	100526788,XLOC_058935,101118709,100141296,100526781,100526782,101117600,101101940,100302307,100294614,443487,101112008,101106451
GO:0051169	nuclear transport	biological_process	0.20174	1	13	1160	165	19038	XLOC_058935,101118709,100141296,100526788,100526781,100526782,101117600,101101940,101106451,101112008,100294614,100302307,443487
GO:0016755	transferase activity, transferring amino-acyl groups	molecular_function	0.20239	1	4	1160	38	19038	101106629,101109916,XLOC_135037,101111638
GO:0015743	malate transport	biological_process	0.20338	1	2	1160	14	19038	1.14111e+17
GO:0004499	N,N-dimethylaniline monooxygenase activity	molecular_function	0.20362	1	2	1160	14	19038	101109936443409
GO:0005666	DNA-directed RNA polymerase III complex	cellular_component	0.2038	1	2	1160	14	19038	1.01121e+17
GO:0030686	90S preribosome	cellular_component	0.20384	1	2	1160	14	19038	1.01109e+17
GO:0042886	amide transport	biological_process	0.20406	1	2	1160	13	19038	443045101105365
GO:0046149	pigment catabolic process	biological_process	0.20408	1	2	1160	14	19038	1.01116e+17
GO:0016021	integral to membrane	cellular_component	0.20473	1	239	1160	3737	19038	101107382,101120814,101114438,101106428,101123528,101110936,XLOC_024284,101118574,101104172,101105913,101102262,101119694,101118709,101113020,101115586,101112713,101104643,101112008,114110616,101122628,101110102,105605823,101111752,101112071,101104587,101109690,101104907,101117137,121819696,443184,101105812,114117995,101103750,101112942,101103433,101116078,101123125,105606440,101111363,101118929,…
GO:0005774	vacuolar membrane	cellular_component	0.20512	1	3	1160	26	19038	1.01108e+26
GO:0044437	vacuolar part	cellular_component	0.20512	1	3	1160	26	19038	1.01108e+26
GO:0005852	eukaryotic translation initiation factor 3 complex	cellular_component	0.20532	1	2	1160	14	19038	1.01113e+17
GO:0052689	carboxylic ester hydrolase activity	molecular_function	0.20534	1	5	1160	52	19038	1.01106e+44
GO:0009306	protein secretion	biological_process	0.20543	1	5	1160	51	19038	1.05616e+44
GO:0008677	2-dehydropantoate 2-reductase activity	molecular_function	0.20594	1	2	1160	14	19038	1.01118e+17
GO:0042440	pigment metabolic process	biological_process	0.20626	1	7	1160	79	19038	1.01108e+62
GO:0044425	membrane part	cellular_component	0.20719	1	277	1160	4353	19038	101103403,101122542,101114882,101120980,101118583,101110423,101104200,101101901,101106317,101123274,114118366,XLOC_135037,101122570,101116460,114117899,101113579,114111226,101112425,114114510,101113825,101108047,114109605,121818828,101119373,101109745,XLOC_011152,101101940,101121229,101102521,101102643,100528010,101114631,101107611,114118324,101116330,101115824,101104661,101123466,101107904,49444…
GO:0005088	Ras guanyl-nucleotide exchange factor activity	molecular_function	0.20908	1	7	1160	77	19038	1.01121e+62
GO:0005089	Rho guanyl-nucleotide exchange factor activity	molecular_function	0.20908	1	7	1160	77	19038	1.01121e+62
GO:0015985	energy coupled proton transport, down electrochemical gradient	biological_process	0.20948	1	6	1160	66	19038	1.00305e+53
GO:0015986	ATP synthesis coupled proton transport	biological_process	0.20948	1	6	1160	66	19038	1.00305e+53
GO:0005488	binding	molecular_function	0.21111	1	718	1160	11509	19038	101104006,101108966,101109543,101122744,101103140,443487,101121429,101106958,101121025,101106424,101102480,101115827,101121228,101111281,443001,101114326,101106113,101115338,101117176,101106493,105608622,101110499,101121742,101109026,101111654,101121337,101108003,121816408,768095,114118019,101108021,101113063,114112673,105610483,101111796,100169939,101103720,101109574,101121391,101106165,10111476…
GO:0019783	small conjugating protein-specific protease activity	molecular_function	0.21152	1	4	1160	39	19038	1.01114e+35
GO:0044428	nuclear part	cellular_component	0.21177	1	49	1160	711	19038	101119619,101102343,101109807,114116130,101105176,101120980,101108700,101110342,101121766,101118939,114108856,101104660,101119854,101120683,101122651,101121053,101113762,443469,105610459,101108584,101104025,114113207,101106373,101108511,101111979,101106673,101115338,101106068,101102976,101110936,101117614,101118935,101112568,114113264,101118709,114113147,101116312,101112008,101111496,101114511,44…
GO:0031974	membrane-enclosed lumen	cellular_component	0.2132	1	37	1160	524	19038	105616092,101110936,101118709,114113147,114113264,101104487,443155,101114511,101108714,101102272,101119870,101119002,114112842,114113008,101116052,114116130,101105176,101120980,101108700,101119619,101109807,101104660,101103644,101119854,101120683,101110342,114108856,101104025,443469,101113762,101121053,105610459,101102976,101108511,114113207,101111979,101106673
GO:0030474	spindle pole body duplication	biological_process	0.21436	1	3	1160	25	19038	1.01116e+26
GO:0051300	spindle pole body organization	biological_process	0.21436	1	3	1160	25	19038	1.01116e+26
GO:0043566	structure-specific DNA binding	molecular_function	0.2158	1	8	1160	95	19038	1.0111e+71
GO:0009317	acetyl-CoA carboxylase complex	cellular_component	0.21909	1	1	1160	4	19038	101106373
GO:0016661	oxidoreductase activity, acting on other nitrogenous compounds as donors	molecular_function	0.21909	1	1	1160	4	19038	101118054
GO:0009251	glucan catabolic process	biological_process	0.21909	1	1	1160	4	19038	101113336
GO:0030245	cellulose catabolic process	biological_process	0.21909	1	1	1160	4	19038	101113336
GO:0044247	cellular polysaccharide catabolic process	biological_process	0.21909	1	1	1160	4	19038	101113336
GO:0051275	beta-glucan catabolic process	biological_process	0.21909	1	1	1160	4	19038	101113336
GO:0004609	phosphatidylserine decarboxylase activity	molecular_function	0.21909	1	1	1160	4	19038	101113438
GO:0036126	sperm flagellum	cellular_component	0.21909	1	1	1160	4	19038	101123466
GO:0097228	sperm principal piece	cellular_component	0.21909	1	1	1160	4	19038	101123466
GO:0006098	pentose-phosphate shunt	biological_process	0.21911	1	1	1160	4	19038	101110313
GO:0006740	NADPH regeneration	biological_process	0.21911	1	1	1160	4	19038	101110313
GO:0004645	phosphorylase activity	molecular_function	0.21922	1	1	1160	4	19038	554320
GO:0008184	glycogen phosphorylase activity	molecular_function	0.21922	1	1	1160	4	19038	554320
GO:0000288	nuclear-transcribed mRNA catabolic process, deadenylation-dependent decay	biological_process	0.21925	1	1	1160	4	19038	101106973
GO:0000290	deadenylation-dependent decapping of nuclear-transcribed mRNA	biological_process	0.21925	1	1	1160	4	19038	101106973
GO:0000281	mitotic cytokinesis	biological_process	0.2194	1	1	1160	4	19038	101112734
GO:0040001	establishment of mitotic spindle localization	biological_process	0.2194	1	1	1160	4	19038	101112734
GO:0051293	establishment of spindle localization	biological_process	0.2194	1	1	1160	4	19038	101112734
GO:0051653	spindle localization	biological_process	0.2194	1	1	1160	4	19038	101112734
GO:0006004	fucose metabolic process	biological_process	0.21956	1	1	1160	4	19038	114117960
GO:0008736	L-fucose isomerase activity	molecular_function	0.21956	1	1	1160	4	19038	114117960
GO:0009108	coenzyme biosynthetic process	biological_process	0.21988	1	7	1160	81	19038	1.01117e+59
GO:0009252	peptidoglycan biosynthetic process	biological_process	0.22013	1	1	1160	4	19038	XLOC_135037
GO:0031122	cytoplasmic microtubule organization	biological_process	0.22015	1	1	1160	4	19038	101109312
GO:0035058	nonmotile primary cilium assembly	biological_process	0.22015	1	1	1160	4	19038	101109312
GO:0018492	carbon-monoxide dehydrogenase (acceptor) activity	molecular_function	0.22047	1	1	1160	4	19038	101104266
GO:0008479	queuine tRNA-ribosyltransferase activity	molecular_function	0.22058	1	1	1160	4	19038	XLOC_037452
GO:0040007	growth	biological_process	0.2206	1	7	1160	81	19038	4.43469e+56
GO:0016592	mediator complex	cellular_component	0.22069	1	12	1160	151	19038	4.43469e+104
GO:0016708	oxidoreductase activity, acting on paired donors, with incorporation or reduction of molecular oxygen, NAD(P)H as one donor, and incorporation of two atoms of oxygen into one donor	molecular_function	0.22073	1	1	1160	4	19038	101119144
GO:0005539	glycosaminoglycan binding	molecular_function	0.221	1	4	1160	40	19038	1.01107e+29
GO:0016695	oxidoreductase activity, acting on hydrogen as donor	molecular_function	0.22114	1	1	1160	4	19038	101107482
GO:0004013	adenosylhomocysteinase activity	molecular_function	0.22147	1	1	1160	4	19038	101109660
GO:0016801	hydrolase activity, acting on ether bonds	molecular_function	0.22147	1	1	1160	4	19038	101109660
GO:0016802	trialkylsulfonium hydrolase activity	molecular_function	0.22147	1	1	1160	4	19038	101109660
GO:0004517	nitric-oxide synthase activity	molecular_function	0.22157	1	1	1160	4	19038	443533
GO:0006809	nitric oxide biosynthetic process	biological_process	0.22157	1	1	1160	4	19038	443533
GO:0046209	nitric oxide metabolic process	biological_process	0.22157	1	1	1160	4	19038	443533
GO:0004340	glucokinase activity	molecular_function	0.22192	1	1	1160	4	19038	101115891
GO:0004396	hexokinase activity	molecular_function	0.22192	1	1	1160	4	19038	101115891
GO:0051156	glucose 6-phosphate metabolic process	biological_process	0.22192	1	1	1160	4	19038	101115891
GO:0032978	protein insertion into membrane from inner side	biological_process	0.22248	1	1	1160	4	19038	101108178
GO:0032979	protein insertion into mitochondrial membrane from inner side	biological_process	0.22248	1	1	1160	4	19038	101108178
GO:0051204	protein insertion into mitochondrial membrane	biological_process	0.22248	1	1	1160	4	19038	101108178
GO:0000976	transcription regulatory region sequence-specific DNA binding	molecular_function	0.22278	1	1	1160	4	19038	101107196
GO:0000271	polysaccharide biosynthetic process	biological_process	0.22304	1	3	1160	26	19038	1.01112e+26
GO:0008174	mRNA methyltransferase activity	molecular_function	0.22326	1	1	1160	4	19038	101122066
GO:0016020	membrane	cellular_component	0.22425	1	394	1160	6240	19038	100528010,101114631,101107611,114118324,XLOC_011152,101110182,101115115,101102059,101101940,101121229,101102726,101102643,101102521,100135696,100568292,101120749,114118302,101122559,101103233,101116330,101115824,101104661,101123466,101107904,494440,114114866,114118323,100127210,443491,114117993,101116157,105608322,101113088,101111964,101115064,101117316,121816725,101106703,XLOC_093086,101102746,1…
GO:0018189	pyrroloquinoline quinone biosynthetic process	biological_process	0.22433	1	1	1160	4	19038	101107196
GO:0018212	peptidyl-tyrosine modification	biological_process	0.22433	1	1	1160	4	19038	101107196
GO:0072527	pyrimidine-containing compound metabolic process	biological_process	0.22482	1	6	1160	67	19038	1.0112e+53
GO:0006289	nucleotide-excision repair	biological_process	0.22538	1	3	1160	27	19038	101104015,XLOC_011152,101102343
GO:0010033	response to organic substance	biological_process	0.22538	1	9	1160	109	19038	1.01122e+77
GO:0009439	cyanate metabolic process	biological_process	0.22561	1	1	1160	4	19038	101117605
GO:0015105	arsenite transmembrane transporter activity	molecular_function	0.22567	1	1	1160	4	19038	114118019
GO:0015700	arsenite transport	biological_process	0.22567	1	1	1160	4	19038	114118019
GO:0019362	pyridine nucleotide metabolic process	biological_process	0.22634	1	2	1160	15	19038	1.01103e+17
GO:0046496	nicotinamide nucleotide metabolic process	biological_process	0.22634	1	2	1160	15	19038	1.01103e+17
GO:0072524	pyridine-containing compound metabolic process	biological_process	0.22634	1	2	1160	15	19038	1.01103e+17
GO:0046961	proton-transporting ATPase activity, rotational mechanism	molecular_function	0.22761	1	2	1160	15	19038	1.01115e+17
GO:0008202	steroid metabolic process	biological_process	0.22809	1	4	1160	40	19038	101119865,101122542,101115040,XLOC_011152
GO:0003697	single-stranded DNA binding	molecular_function	0.22826	1	3	1160	27	19038	1.05602e+26
GO:0019898	extrinsic to membrane	cellular_component	0.22865	1	7	1160	81	19038	100141296,101108311,443487,100526781,101114097,XLOC_024284,101123274
GO:0006006	glucose metabolic process	biological_process	0.22891	1	5	1160	54	19038	1.00216e+44
GO:0006278	RNA-dependent DNA replication	biological_process	0.22956	1	2	1160	15	19038	100037690,XLOC_060480
GO:0019637	organophosphate metabolic process	biological_process	0.23108	1	31	1160	437	19038	101116406,121819509,101107723,101119197,101104979,101117092,114115304,100305130,101107611,101123332,101110313,101115005,101105646,101102453,101117614,100270715,101104433,101120808,101102696,101119460,101118367,101119865,XLOC_058935,101106080,101113438,101117510,101115891,101111683,101106160,101117432,101116640
GO:0016682	oxidoreductase activity, acting on diphenols and related substances as donors, oxygen as acceptor	molecular_function	0.23136	1	4	1160	40	19038	101109765,XLOC_011152,101117602,XLOC_060480
GO:0009150	purine ribonucleotide metabolic process	biological_process	0.23171	1	13	1160	168	19038	1.01106e+116
GO:0006575	cellular modified amino acid metabolic process	biological_process	0.23217	1	6	1160	68	19038	1.01117e+50
GO:0005217	intracellular ligand-gated ion channel activity	molecular_function	0.23249	1	4	1160	40	19038	1.01109e+35
GO:0005218	intracellular ligand-gated calcium channel activity	molecular_function	0.23249	1	4	1160	40	19038	1.01121e+35
GO:0005219	ryanodine-sensitive calcium-release channel activity	molecular_function	0.23249	1	4	1160	40	19038	1.01105e+35
GO:0015278	calcium-release channel activity	molecular_function	0.23249	1	4	1160	40	19038	1.01105e+35
GO:0006606	protein import into nucleus	biological_process	0.23334	1	10	1160	126	19038	1.01102e+86
GO:0034504	protein localization to nucleus	biological_process	0.23334	1	10	1160	126	19038	1.00527e+86
GO:0044744	protein targeting to nucleus	biological_process	0.23334	1	10	1160	126	19038	4.43487e+86
GO:0051170	nuclear import	biological_process	0.23334	1	10	1160	126	19038	1.00141e+86
GO:0016820	hydrolase activity, acting on acid anhydrides, catalyzing transmembrane movement of substances	molecular_function	0.23408	1	12	1160	155	19038	101111268,101115005,106991578,101113504,101119460,101118367,101108027,101106745,101110499,100305130,XLOC_037452,101106197
GO:0009126	purine nucleoside monophosphate metabolic process	biological_process	0.23419	1	2	1160	14	19038	1.01104e+17
GO:0009127	purine nucleoside monophosphate biosynthetic process	biological_process	0.23419	1	2	1160	14	19038	1.01104e+17
GO:0009167	purine ribonucleoside monophosphate metabolic process	biological_process	0.23419	1	2	1160	14	19038	1.01105e+17
GO:0009168	purine ribonucleoside monophosphate biosynthetic process	biological_process	0.23419	1	2	1160	14	19038	1.01105e+17
GO:0042060	wound healing	biological_process	0.23502	1	12	1160	155	19038	101121391,101117600,100294614,443487,101113971,100526788,XLOC_058935,101111752,101121559,101106681,100526781,101106373
GO:0044421	extracellular region part	cellular_component	0.23569	1	37	1160	524	19038	101116580,101114123,101111396,114112680,100526788,101103403,101114786,443487,101111268,101116476,101106373,101106841,101102085,101106681,114117771,105601985,101107183,100294614,494440,114109630,121817953,101112321,101122692,101119694,101112710,101114841,101106322,100526781,101111752,XLOC_058935,101121559,101113971,101102644,101105527,101108381,101121391,101117600
GO:0008565	protein transporter activity	molecular_function	0.23649	1	7	1160	83	19038	1.00527e+59
GO:0019904	protein domain specific binding	molecular_function	0.23772	1	2	1160	15	19038	1.00302e+17
GO:0016758	transferase activity, transferring hexosyl groups	molecular_function	0.23823	1	16	1160	210	19038	1.14115e+140
GO:0009119	ribonucleoside metabolic process	biological_process	0.23842	1	12	1160	155	19038	100305130,XLOC_037452,101106080,101119460,101118367,101104979,101119197,114115304,101117432,101123332,101115005,101105646
GO:0043934	sporulation	biological_process	0.23905	1	3	1160	28	19038	1.01104e+26
GO:0007213	G-protein coupled acetylcholine receptor signaling pathway	biological_process	0.24054	1	1	1160	4	19038	101122306
GO:0043113	receptor clustering	biological_process	0.24054	1	1	1160	4	19038	101122306
GO:0043236	laminin binding	molecular_function	0.24054	1	1	1160	4	19038	101122306
GO:0072657	protein localization to membrane	biological_process	0.24054	1	1	1160	4	19038	101122306
GO:0018995	host	cellular_component	0.24237	1	13	1160	166	19038	1.01108e+113
GO:0043245	extraorganismal space	cellular_component	0.24237	1	13	1160	166	19038	1.01108e+113
GO:0043657	host cell	cellular_component	0.24237	1	13	1160	166	19038	4.9444e+113
GO:0044215	other organism	cellular_component	0.24237	1	13	1160	166	19038	1.01108e+113
GO:0044216	other organism cell	cellular_component	0.24237	1	13	1160	166	19038	1.14118e+113
GO:0044217	other organism part	cellular_component	0.24237	1	13	1160	166	19038	1.21818e+113
GO:0035556	intracellular signal transduction	biological_process	0.24345	1	54	1160	797	19038	101111683,101106317,101122126,101123321,101121228,114109630,101123521,114114866,101105306,105604930,101119452,101105642,105601990,101107639,101105233,101121648,101109765,100216436,114118024,105601988,101123079,114118738,114118018,105616456,101115374,101122281,101104660,101123259,101121257,101103094,101113595,101119201,100302067,101113294,100526781,101114119,101120116,101106808,114118023,101119014…
GO:0006919	activation of cysteine-type endopeptidase activity involved in apoptotic process	biological_process	0.24349	1	2	1160	15	19038	1.01102e+17
GO:0010950	positive regulation of endopeptidase activity	biological_process	0.24349	1	2	1160	15	19038	1.14115e+17
GO:0010952	positive regulation of peptidase activity	biological_process	0.24349	1	2	1160	15	19038	1.01102e+17
GO:0043280	positive regulation of cysteine-type endopeptidase activity involved in apoptotic process	biological_process	0.24349	1	2	1160	15	19038	1.01102e+17
GO:0097202	activation of cysteine-type endopeptidase activity	biological_process	0.24349	1	2	1160	15	19038	1.01102e+17
GO:2001056	positive regulation of cysteine-type endopeptidase activity	biological_process	0.24349	1	2	1160	15	19038	1.01102e+17
GO:0008047	enzyme activator activity	molecular_function	0.24359	1	9	1160	109	19038	1.01116e+80
GO:0005083	small GTPase regulator activity	molecular_function	0.24368	1	8	1160	95	19038	1.00216e+71
GO:1901135	carbohydrate derivative metabolic process	biological_process	0.24369	1	36	1160	515	19038	114115304,101104979,101119197,100305130,101121731,101123332,101105646,101102453,101115005,100270715,101118367,XLOC_058935,101119865,101106080,114114873,121819509,101107723,101121025,101117092,XLOC_037452,101107611,114110625,101107630,101104433,101120808,101119460,101103203,101118027,101103907,101116528,101111683,101115891,101117432,101106160,XLOC_135037,101105064
GO:0042278	purine nucleoside metabolic process	biological_process	0.24467	1	11	1160	141	19038	1.01119e+98
GO:0046128	purine ribonucleoside metabolic process	biological_process	0.24467	1	11	1160	141	19038	1.01106e+98
GO:0006874	cellular calcium ion homeostasis	biological_process	0.2458	1	4	1160	41	19038	1.01105e+35
GO:0055074	calcium ion homeostasis	biological_process	0.2458	1	4	1160	41	19038	1.01121e+35
GO:0072503	cellular divalent inorganic cation homeostasis	biological_process	0.2458	1	4	1160	41	19038	1.01105e+35
GO:0072507	divalent inorganic cation homeostasis	biological_process	0.2458	1	4	1160	41	19038	1.01121e+35
GO:0009129	pyrimidine nucleoside monophosphate metabolic process	biological_process	0.24817	1	1	1160	4	19038	101119865
GO:0009130	pyrimidine nucleoside monophosphate biosynthetic process	biological_process	0.24817	1	1	1160	4	19038	101119865
GO:0044085	cellular component biogenesis	biological_process	0.24862	1	60	1160	902	19038	105601868,101111964,XLOC_024284,101102351,101107566,105602047,101109026,101113707,443533,101122692,101118709,100141296,101114679,101115966,114118022,106991578,101117510,101121391,101117600,114111225,114112844,100526781,101107787,114111619,101109312,101113971,101111752,101108714,XLOC_058935,101121559,443487,101104558,101118623,121817369,101106451,101101940,101111396,101118939,114118018,101102499,1…
GO:0008610	lipid biosynthetic process	biological_process	0.24921	1	15	1160	197	19038	101118054,101102453,XLOC_011152,101113438,101115040,101119116,101122542,100270715,101106373,101107723,101107611,101119014,101110118,101119865,101107229
GO:0006835	dicarboxylic acid transport	biological_process	0.24957	1	3	1160	28	19038	1.14111e+26
GO:0008827	cytochrome o ubiquinol oxidase activity	molecular_function	0.24985	1	3	1160	28	19038	XLOC_011152,XLOC_060480,101109765
GO:0042600	chorion	cellular_component	0.25067	1	8	1160	98	19038	1.01115e+65
GO:0005882	intermediate filament	cellular_component	0.25069	1	16	1160	216	19038	1.01107e+140
GO:0045111	intermediate filament cytoskeleton	cellular_component	0.25069	1	16	1160	216	19038	1.01107e+140
GO:0014070	response to organic cyclic compound	biological_process	0.25155	1	6	1160	69	19038	1.01122e+50
GO:0051028	mRNA transport	biological_process	0.2529	1	5	1160	56	19038	497271,101118709,XLOC_058935,101111678,101112008
GO:0000151	ubiquitin ligase complex	cellular_component	0.25336	1	10	1160	129	19038	1.01113e+89
GO:0016050	vesicle organization	biological_process	0.25418	1	3	1160	29	19038	XLOC_024284,114111619,114110552
GO:0065008	regulation of biological quality	biological_process	0.25643	1	42	1160	617	19038	101122047,100526781,121817901,101111508,101113971,101119870,101123514,101117137,101108714,101111752,XLOC_058935,101121559,101104643,100145870,101121391,101117600,101108308,101103340,101117537,101104172,105601868,101122043,101119193,101120749,101106373,101123403,101106681,101110748,100294614,114109630,101105943,101114631,101106424,100135692,101106057,100526788,443487,100216436,101119619,121818722,…
GO:0006869	lipid transport	biological_process	0.25691	1	8	1160	97	19038	101106373,105604590,XLOC_058935,100125354,101107904,101107197,101117614,XLOC_135037
GO:0010927	cellular component assembly involved in morphogenesis	biological_process	0.2575	1	2	1160	16	19038	1.01109e+17
GO:0042384	cilium assembly	biological_process	0.2575	1	2	1160	16	19038	1.01109e+17
GO:0060271	cilium morphogenesis	biological_process	0.2575	1	2	1160	16	19038	1.05604e+17
GO:0019954	asexual reproduction	biological_process	0.26412	1	8	1160	100	19038	1.01119e+71
GO:0033554	cellular response to stress	biological_process	0.265	1	41	1160	610	19038	101102359,101107532,101119014,101119002,114118023,101117248,101121889,121820019,443155,101121486,101112758,114118019,101101948,101116988,105605808,105610483,114112673,101123507,101102466,105604930,100037690,105601990,101116521,101123380,114109630,101104015,101104819,100527962,101105018,114109364,101123503,101117092,114118018,101121766,101115595,105601988,101123079,114118024,101102343,101121481,XL…
GO:0032954	regulation of cytokinetic process	biological_process	0.26591	1	1	1160	5	19038	121817369
GO:0032955	regulation of barrier septum assembly	biological_process	0.26591	1	1	1160	5	19038	121817369
GO:1901891	regulation of cell septum assembly	biological_process	0.26591	1	1	1160	5	19038	121817369
GO:0004022	alcohol dehydrogenase (NAD) activity	molecular_function	0.26593	1	1	1160	5	19038	101110890
GO:0015945	methanol metabolic process	biological_process	0.26593	1	1	1160	5	19038	101110890
GO:0015946	methanol oxidation	biological_process	0.26593	1	1	1160	5	19038	101110890
GO:0034308	primary alcohol metabolic process	biological_process	0.26593	1	1	1160	5	19038	101110890
GO:0018142	protein-DNA covalent cross-linking	biological_process	0.26611	1	1	1160	5	19038	101123336
GO:0006189	'de novo' IMP biosynthetic process	biological_process	0.26621	1	1	1160	5	19038	101104433
GO:0030908	protein splicing	biological_process	0.26621	1	1	1160	5	19038	101121581
GO:0051345	positive regulation of hydrolase activity	biological_process	0.26628	1	2	1160	16	19038	1.01102e+17
GO:0030507	spectrin binding	molecular_function	0.26659	1	1	1160	5	19038	101111752
GO:0003726	double-stranded RNA adenosine deaminase activity	molecular_function	0.26666	1	1	1160	5	19038	101104169
GO:0003953	NAD+ nucleosidase activity	molecular_function	0.26671	1	1	1160	5	19038	105614340
GO:0030354	melanin-concentrating hormone activity	molecular_function	0.26681	1	1	1160	5	19038	101111396
GO:0016774	phosphotransferase activity, carboxyl group as acceptor	molecular_function	0.26692	1	1	1160	5	19038	100216440
GO:0006084	acetyl-CoA metabolic process	biological_process	0.26731	1	1	1160	5	19038	101104266
GO:0006637	acyl-CoA metabolic process	biological_process	0.26731	1	1	1160	5	19038	101104266
GO:0035383	thioester metabolic process	biological_process	0.26731	1	1	1160	5	19038	101104266
GO:0008156	negative regulation of DNA replication	biological_process	0.26732	1	1	1160	5	19038	101123380
GO:0048478	replication fork protection	biological_process	0.26732	1	1	1160	5	19038	101123380
GO:0051053	negative regulation of DNA metabolic process	biological_process	0.26732	1	1	1160	5	19038	101123380
GO:0090329	regulation of DNA-dependent DNA replication	biological_process	0.26732	1	1	1160	5	19038	101123380
GO:2000104	negative regulation of DNA-dependent DNA replication	biological_process	0.26732	1	1	1160	5	19038	101123380
GO:0002161	aminoacyl-tRNA editing activity	molecular_function	0.26737	1	1	1160	5	19038	101106890
GO:0015627	type II protein secretion system complex	cellular_component	0.26798	1	1	1160	5	19038	101122054
GO:0015628	protein secretion by the type II secretion system	biological_process	0.26798	1	1	1160	5	19038	101122054
GO:0009273	peptidoglycan-based cell wall biogenesis	biological_process	0.26854	1	1	1160	5	19038	XLOC_135037
GO:0006544	glycine metabolic process	biological_process	0.26881	1	1	1160	5	19038	101117476
GO:0000772	mating pheromone activity	molecular_function	0.26938	1	1	1160	5	19038	443412
GO:0043385	mycotoxin metabolic process	biological_process	0.26952	1	1	1160	5	19038	XLOC_058935
GO:0043386	mycotoxin biosynthetic process	biological_process	0.26952	1	1	1160	5	19038	XLOC_058935
GO:0045122	aflatoxin biosynthetic process	biological_process	0.26952	1	1	1160	5	19038	XLOC_058935
GO:0046222	aflatoxin metabolic process	biological_process	0.26952	1	1	1160	5	19038	XLOC_058935
GO:1901376	organic heteropentacyclic compound metabolic process	biological_process	0.26952	1	1	1160	5	19038	XLOC_058935
GO:1901378	organic heteropentacyclic compound biosynthetic process	biological_process	0.26952	1	1	1160	5	19038	XLOC_058935
GO:0031981	nuclear lumen	cellular_component	0.26961	1	34	1160	493	19038	105610459,101121053,101113762,443469,101104025,101106673,114113207,101108511,101111979,101102976,101109807,101119619,101120980,101108700,114116130,101105176,114108856,101110342,101120683,101104660,101119854,101114511,443155,101104487,101116052,114113008,114112842,101119002,101102272,101108714,101110936,114113264,114113147,101118709
GO:0007601	visual perception	biological_process	0.27054	1	1	1160	5	19038	101108572
GO:0030553	cGMP binding	molecular_function	0.27054	1	1	1160	5	19038	101108572
GO:0050953	sensory perception of light stimulus	biological_process	0.27054	1	1	1160	5	19038	101108572
GO:0019318	hexose metabolic process	biological_process	0.27232	1	8	1160	101	19038	1.01116e+71
GO:0072350	tricarboxylic acid metabolic process	biological_process	0.27262	1	1	1160	5	19038	101107196
GO:0072351	tricarboxylic acid biosynthetic process	biological_process	0.27262	1	1	1160	5	19038	101107196
GO:0044000	movement in host	biological_process	0.27279	1	2	1160	17	19038	1.01104e+17
GO:0046739	spread of virus in multicellular host	biological_process	0.27279	1	2	1160	17	19038	1.01105e+17
GO:0046740	spread of virus in host, cell to cell	biological_process	0.27279	1	2	1160	17	19038	1.01104e+17
GO:0051814	movement in other organism involved in symbiotic interaction	biological_process	0.27279	1	2	1160	17	19038	1.01105e+17
GO:0032182	small conjugating protein binding	molecular_function	0.27447	1	4	1160	44	19038	1.01104e+35
GO:0017070	U6 snRNA binding	molecular_function	0.2746	1	1	1160	5	19038	114118018
GO:0004318	enoyl-[acyl-carrier-protein] reductase (NADH) activity	molecular_function	0.27474	1	1	1160	5	19038	101117221
GO:0003964	RNA-directed DNA polymerase activity	molecular_function	0.27504	1	2	1160	17	19038	XLOC_060480,100037690
GO:0043623	cellular protein complex assembly	biological_process	0.27941	1	21	1160	301	19038	100526781,101106373,114111619,101113971,101106681,101111752,XLOC_058935,101121559,100294614,101114679,XLOC_135037,101117600,101121391,101118939,100526788,101103644,443487,XLOC_024284,101111964,105601868,101101940
GO:0044782	cilium organization	biological_process	0.28027	1	2	1160	17	19038	1.05604e+17
GO:0016052	carbohydrate catabolic process	biological_process	0.28366	1	5	1160	59	19038	1.00216e+44
GO:0001522	pseudouridine synthesis	biological_process	0.28516	1	3	1160	31	19038	1.01113e+26
GO:0044452	nucleolar part	cellular_component	0.28588	1	2	1160	17	19038	1.0111e+17
GO:0048646	anatomical structure formation involved in morphogenesis	biological_process	0.28909	1	9	1160	116	19038	1.00886e+74
GO:0009415	response to water stimulus	biological_process	0.29015	1	1	1160	5	19038	101106808
GO:0003707	steroid hormone receptor activity	molecular_function	0.29017	1	3	1160	31	19038	1.01122e+23
GO:0008238	exopeptidase activity	molecular_function	0.29121	1	10	1160	133	19038	1.01115e+89
GO:0046148	pigment biosynthetic process	biological_process	0.29326	1	5	1160	59	19038	1.01108e+44
GO:0022884	macromolecule transmembrane transporter activity	molecular_function	0.29508	1	2	1160	18	19038	1.01112e+17
GO:0009755	hormone-mediated signaling pathway	biological_process	0.29509	1	6	1160	73	19038	1.01122e+50
GO:0032870	cellular response to hormone stimulus	biological_process	0.29509	1	6	1160	73	19038	4.43412e+50
GO:0030976	thiamine pyrophosphate binding	molecular_function	0.29532	1	2	1160	18	19038	1.0111e+17
GO:0008641	small protein activating enzyme activity	molecular_function	0.29658	1	2	1160	18	19038	1.05606e+17
GO:0006787	porphyrin-containing compound catabolic process	biological_process	0.29683	1	2	1160	18	19038	1.01114e+17
GO:0033015	tetrapyrrole catabolic process	biological_process	0.29683	1	2	1160	18	19038	1.01116e+17
GO:0016044	cellular membrane organization	biological_process	0.29793	1	8	1160	104	19038	101107904,101122306,XLOC_024284,101113077,101110526,114111619,105604590,101108178
GO:0003690	double-stranded DNA binding	molecular_function	0.29864	1	4	1160	46	19038	1.2182e+35
GO:0008013	beta-catenin binding	molecular_function	0.30105	1	2	1160	18	19038	1.01116e+17
GO:0032801	receptor catabolic process	biological_process	0.3012	1	2	1160	18	19038	1.01108e+17
GO:0044763	single-organism cellular process	biological_process	0.30503	1	426	1160	6840	19038	XLOC_058935,101117598,101117983,101118367,101102430,443465,101114097,101113294,101105365,101121889,101108435,100302067,101117248,554257,100302307,101115800,101111749,101101948,101110397,554255,101121198,101110446,114118537,101117408,101116860,105603509,101106247,101105657,101106793,101106160,101123521,101104025,101122214,XLOC_063735,443403,101117971,101117346,101121774,101122600,101121581,1011202…
GO:0044057	regulation of system process	biological_process	0.30773	1	3	1160	32	19038	1.01123e+26
GO:0065004	protein-DNA complex assembly	biological_process	0.30869	1	7	1160	90	19038	114112844,101104558,443403,114111225,XLOC_024284,101121445,101108714
GO:0071824	protein-DNA complex subunit organization	biological_process	0.30869	1	7	1160	90	19038	101108714,101121445,114111225,443403,114112844,101104558,XLOC_024284
GO:0008236	serine-type peptidase activity	molecular_function	0.30887	1	23	1160	334	19038	1.01117e+206
GO:0017171	serine hydrolase activity	molecular_function	0.30887	1	23	1160	334	19038	1.01112e+206
GO:0005231	excitatory extracellular ligand-gated ion channel activity	molecular_function	0.30894	1	3	1160	28	19038	1.01106e+26
GO:0015721	bile acid and bile salt transport	biological_process	0.30992	1	1	1160	6	19038	101110182
GO:0046982	protein heterodimerization activity	molecular_function	0.30992	1	1	1160	6	19038	101110182
GO:0004749	ribose phosphate diphosphokinase activity	molecular_function	0.30993	1	1	1160	6	19038	101117092
GO:0005849	mRNA cleavage factor complex	cellular_component	0.30995	1	1	1160	6	19038	101104660
GO:0006378	mRNA polyadenylation	biological_process	0.30995	1	1	1160	6	19038	101104660
GO:0004514	nicotinate-nucleotide diphosphorylase (carboxylating) activity	molecular_function	0.3101	1	1	1160	6	19038	101102696
GO:0009435	NAD biosynthetic process	biological_process	0.3101	1	1	1160	6	19038	101102696
GO:0019674	NAD metabolic process	biological_process	0.3101	1	1	1160	6	19038	101102696
GO:0006027	glycosaminoglycan catabolic process	biological_process	0.31025	1	1	1160	6	19038	101121731
GO:0008745	N-acetylmuramoyl-L-alanine amidase activity	molecular_function	0.31025	1	1	1160	6	19038	101121731
GO:0009253	peptidoglycan catabolic process	biological_process	0.31025	1	1	1160	6	19038	101121731
GO:0034755	iron ion transmembrane transport	biological_process	0.31051	1	1	1160	6	19038	101113825
GO:0004852	uroporphyrinogen-III synthase activity	molecular_function	0.3111	1	1	1160	6	19038	101115005
GO:0019073	viral DNA genome packaging	biological_process	0.31123	1	1	1160	6	19038	101102351
GO:0031344	regulation of cell projection organization	biological_process	0.31163	1	1	1160	6	19038	101117510
GO:0060491	regulation of cell projection assembly	biological_process	0.31163	1	1	1160	6	19038	101117510
GO:1902115	regulation of organelle assembly	biological_process	0.31163	1	1	1160	6	19038	101117510
GO:1902208	regulation of bacterial-type flagellum assembly	biological_process	0.31163	1	1	1160	6	19038	101117510
GO:1901700	response to oxygen-containing compound	biological_process	0.31164	1	3	1160	32	19038	1.01108e+26
GO:0015204	urea transmembrane transporter activity	molecular_function	0.31177	1	1	1160	5	19038	101105365
GO:0015840	urea transport	biological_process	0.31177	1	1	1160	5	19038	101105365
GO:0019755	one-carbon compound transport	biological_process	0.31177	1	1	1160	5	19038	101105365
GO:0042887	amide transmembrane transporter activity	molecular_function	0.31177	1	1	1160	5	19038	101105365
GO:0071918	urea transmembrane transport	biological_process	0.31177	1	1	1160	5	19038	101105365
GO:0022412	cellular process involved in reproduction in multicellular organism	biological_process	0.31182	1	7	1160	90	19038	1.01108e+56
GO:0006754	ATP biosynthetic process	biological_process	0.31182	1	6	1160	76	19038	1.01118e+53
GO:0031503	protein complex localization	biological_process	0.31198	1	1	1160	6	19038	101112734
GO:0000795	synaptonemal complex	cellular_component	0.3121	1	1	1160	6	19038	101104025
GO:0032266	phosphatidylinositol-3-phosphate binding	molecular_function	0.31311	1	1	1160	6	19038	101103774
GO:1901988	negative regulation of cell cycle phase transition	biological_process	0.3134	1	4	1160	47	19038	4.43155e+32
GO:0003989	acetyl-CoA carboxylase activity	molecular_function	0.31534	1	1	1160	6	19038	101106373
GO:0016421	CoA carboxylase activity	molecular_function	0.31534	1	1	1160	6	19038	101106373
GO:0016885	ligase activity, forming carbon-carbon bonds	molecular_function	0.31534	1	1	1160	6	19038	101106373
GO:0071495	cellular response to endogenous stimulus	biological_process	0.31638	1	6	1160	75	19038	1.01105e+50
GO:0010876	lipid localization	biological_process	0.31707	1	9	1160	119	19038	101107904,101107197,101117614,101121305,XLOC_135037,101106373,105604590,XLOC_058935,100125354
GO:0006275	regulation of DNA replication	biological_process	0.31782	1	4	1160	45	19038	1.01123e+32
GO:0005544	calcium-dependent phospholipid binding	molecular_function	0.31811	1	2	1160	19	19038	1.01102e+17
GO:0042438	melanin biosynthetic process	biological_process	0.31885	1	1	1160	6	19038	101107672
GO:0046189	phenol-containing compound biosynthetic process	biological_process	0.31885	1	1	1160	6	19038	101107672
GO:0006073	cellular glucan metabolic process	biological_process	0.319	1	2	1160	19	19038	1.14111e+17
GO:0044042	glucan metabolic process	biological_process	0.319	1	2	1160	19	19038	1.14111e+17
GO:0019888	protein phosphatase regulator activity	molecular_function	0.31924	1	2	1160	19	19038	1.0111e+17
GO:0051187	cofactor catabolic process	biological_process	0.31944	1	2	1160	19	19038	1.01116e+17
GO:0072522	purine-containing compound biosynthetic process	biological_process	0.32062	1	11	1160	151	19038	1.00305e+98
GO:0006406	mRNA export from nucleus	biological_process	0.3218	1	3	1160	33	19038	XLOC_058935,101118709,101112008
GO:0033993	response to lipid	biological_process	0.32566	1	5	1160	61	19038	1.01122e+41
GO:0043401	steroid hormone mediated signaling pathway	biological_process	0.32566	1	5	1160	61	19038	1.01122e+41
GO:0048545	response to steroid hormone stimulus	biological_process	0.32566	1	5	1160	61	19038	1.01122e+41
GO:0071383	cellular response to steroid hormone stimulus	biological_process	0.32566	1	5	1160	61	19038	1.01122e+41
GO:0071396	cellular response to lipid	biological_process	0.32566	1	5	1160	61	19038	1.01122e+41
GO:0071407	cellular response to organic cyclic compound	biological_process	0.32566	1	5	1160	61	19038	1.01122e+41
GO:0004523	ribonuclease H activity	molecular_function	0.32593	1	4	1160	46	19038	1.01106e+35
GO:0000956	nuclear-transcribed mRNA catabolic process	biological_process	0.32664	1	2	1160	19	19038	1.01109e+17
GO:0005496	steroid binding	molecular_function	0.32672	1	3	1160	33	19038	1.01122e+23
GO:0043531	ADP binding	molecular_function	0.32798	1	4	1160	48	19038	1.01123e+35
GO:0044724	single-organism carbohydrate catabolic process	biological_process	0.32813	1	4	1160	48	19038	1.00216e+35
GO:0030117	membrane coat	cellular_component	0.32893	1	10	1160	137	19038	1.01107e+89
GO:0048475	coated membrane	cellular_component	0.32893	1	10	1160	137	19038	1.01112e+89
GO:0006364	rRNA processing	biological_process	0.32947	1	7	1160	93	19038	1.01112e+62
GO:0016072	rRNA metabolic process	biological_process	0.32947	1	7	1160	93	19038	1.01116e+62
GO:0016559	peroxisome fission	biological_process	0.33028	1	1	1160	6	19038	101117137
GO:0065003	macromolecular complex assembly	biological_process	0.33276	1	34	1160	514	19038	XLOC_024284,105601868,101111964,101107566,100526781,114112844,114111225,114111619,101113971,101108714,101111752,XLOC_058935,101121559,101114679,101115966,101117600,101121391,101118939,101102499,100526788,101121445,101111928,101103644,443487,101104558,101106451,101118623,101101940,101106373,101106681,100294614,443403,XLOC_135037,101115572
GO:0000228	nuclear chromosome	cellular_component	0.33325	1	9	1160	122	19038	1.0112e+77
GO:0044454	nuclear chromosome part	cellular_component	0.33439	1	8	1160	107	19038	1.01107e+68
GO:0005246	calcium channel regulator activity	molecular_function	0.33777	1	3	1160	33	19038	1.01112e+26
GO:0016667	oxidoreductase activity, acting on a sulfur group of donors	molecular_function	0.33989	1	11	1160	155	19038	1.01117e+98
GO:0005732	small nucleolar ribonucleoprotein complex	cellular_component	0.34034	1	2	1160	20	19038	1.0111e+17
GO:0016891	endoribonuclease activity, producing 5'-phosphomonoesters	molecular_function	0.34074	1	5	1160	62	19038	1.01106e+44
GO:0003008	system process	biological_process	0.34151	1	10	1160	140	19038	1.01123e+89
GO:0015459	potassium channel regulator activity	molecular_function	0.34172	1	2	1160	19	19038	1.01122e+17
GO:0019870	potassium channel inhibitor activity	molecular_function	0.34172	1	2	1160	19	19038	1.01122e+17
GO:0009288	bacterial-type flagellum	cellular_component	0.34244	1	4	1160	49	19038	1.01103e+35
GO:0006281	DNA repair	biological_process	0.34487	1	33	1160	504	19038	114118018,101121766,101115595,105601988,101123079,101102343,114118024,101121481,XLOC_011152,101102466,105604930,105601990,100037690,101116521,101104015,101104819,100527962,101105018,101123503,101112758,114118019,101116988,101101948,114112673,105610483,105605808,101123507,101119014,114118023,101121889,121820019,443155,101121486
GO:1901607	alpha-amino acid biosynthetic process	biological_process	0.34491	1	7	1160	94	19038	4.43409e+59
GO:0051052	regulation of DNA metabolic process	biological_process	0.34607	1	4	1160	47	19038	4.43155e+32
GO:0034220	ion transmembrane transport	biological_process	0.3474	1	22	1160	326	19038	101117137,101106080,XLOC_058935,101119460,101122445,101108027,101118367,101113825,106991578,443412,101103310,100305130,101108864,101106745,114115304,105601988,101113504,101123578,101122198,101115005,101119078,101123332
GO:0016791	phosphatase activity	molecular_function	0.34836	1	21	1160	296	19038	1.01123e+185
GO:0007264	small GTPase mediated signal transduction	biological_process	0.34996	1	26	1160	390	19038	100216436,101120796,101120620,101115374,101120630,101122281,101119694,101101993,101121257,101123259,101123321,101111683,101106317,101121228,101123521,100302067,114114866,101106808,101113294,101105306,100526781,101114119,101105233,101119452,101115534,101109765
GO:0008810	cellulase activity	molecular_function	0.35135	1	1	1160	7	19038	101113336
GO:0006188	IMP biosynthetic process	biological_process	0.35157	1	1	1160	7	19038	101104433
GO:0046040	IMP metabolic process	biological_process	0.35157	1	1	1160	7	19038	101104433
GO:0004814	arginine-tRNA ligase activity	molecular_function	0.35169	1	1	1160	7	19038	101112906
GO:0006420	arginyl-tRNA aminoacylation	biological_process	0.35169	1	1	1160	7	19038	101112906
GO:0000152	nuclear ubiquitin ligase complex	cellular_component	0.35205	1	9	1160	126	19038	1.01109e+80
GO:0005680	anaphase-promoting complex	cellular_component	0.35205	1	9	1160	126	19038	1.01116e+80
GO:0031461	cullin-RING ubiquitin ligase complex	cellular_component	0.35205	1	9	1160	126	19038	1.01119e+80
GO:0044038	cell wall macromolecule biosynthetic process	biological_process	0.35222	1	1	1160	7	19038	XLOC_135037
GO:0070589	cellular component macromolecule biosynthetic process	biological_process	0.35222	1	1	1160	7	19038	XLOC_135037
GO:0015833	peptide transport	biological_process	0.35252	1	1	1160	7	19038	443045
GO:0045005	maintenance of fidelity involved in DNA-dependent DNA replication	biological_process	0.35256	1	1	1160	7	19038	101123380
GO:0009424	bacterial-type flagellum hook	cellular_component	0.35269	1	1	1160	7	19038	101103310
GO:0048610	cellular process involved in reproduction	biological_process	0.35352	1	20	1160	293	19038	1.01123e+173
GO:0044275	cellular carbohydrate catabolic process	biological_process	0.35383	1	1	1160	7	19038	101113336
GO:0032994	protein-lipid complex	cellular_component	0.35386	1	1	1160	7	19038	101111268
GO:0034358	plasma lipoprotein particle	cellular_component	0.35386	1	1	1160	7	19038	101111268
GO:0042627	chylomicron	cellular_component	0.35386	1	1	1160	7	19038	101111268
GO:0005186	pheromone activity	molecular_function	0.35447	1	1	1160	7	19038	443412
GO:0051274	beta-glucan biosynthetic process	biological_process	0.35532	1	1	1160	7	19038	114111226
GO:0030089	phycobilisome	cellular_component	0.35535	1	1	1160	7	19038	XLOC_024284
GO:0030551	cyclic nucleotide binding	molecular_function	0.35541	1	1	1160	7	19038	101108572
GO:0004371	glycerone kinase activity	molecular_function	0.35551	1	1	1160	7	19038	101122194
GO:0006071	glycerol metabolic process	biological_process	0.35551	1	1	1160	7	19038	101122194
GO:0005654	nucleoplasm	cellular_component	0.35726	1	24	1160	356	19038	1.01112e+212
GO:0044451	nucleoplasm part	cellular_component	0.35726	1	24	1160	356	19038	1.14109e+212
GO:0016628	oxidoreductase activity, acting on the CH-CH group of donors, NAD or NADP as acceptor	molecular_function	0.35732	1	3	1160	35	19038	1.01117e+26
GO:0016742	hydroxymethyl-, formyl- and related transferase activity	molecular_function	0.3593	1	1	1160	7	19038	101121731
GO:0008107	galactoside 2-alpha-L-fucosyltransferase activity	molecular_function	0.35951	1	1	1160	6	19038	101107465
GO:0031127	alpha-(1,2)-fucosyltransferase activity	molecular_function	0.35951	1	1	1160	6	19038	101107465
GO:0005388	calcium-transporting ATPase activity	molecular_function	0.35973	1	1	1160	7	19038	101111268
GO:0009165	nucleotide biosynthetic process	biological_process	0.36163	1	13	1160	187	19038	1.01112e+116
GO:1901293	nucleoside phosphate biosynthetic process	biological_process	0.36163	1	13	1160	187	19038	1.01106e+116
GO:0019439	aromatic compound catabolic process	biological_process	0.36166	1	9	1160	126	19038	XLOC_058935,101108714,101112185,101116406,101115927,101117432,101113553,101119144,101106973
GO:0004984	olfactory receptor activity	molecular_function	0.36176	1	1	1160	7	19038	101122570
GO:0007167	enzyme linked receptor protein signaling pathway	biological_process	0.36362	1	3	1160	32	19038	1.01123e+26
GO:0007169	transmembrane receptor protein tyrosine kinase signaling pathway	biological_process	0.36362	1	3	1160	32	19038	1.01123e+26
GO:0030955	potassium ion binding	molecular_function	0.36451	1	5	1160	64	19038	1.01105e+44
GO:0031420	alkali metal ion binding	molecular_function	0.36451	1	5	1160	64	19038	1.01112e+44
GO:0007276	gamete generation	biological_process	0.36459	1	10	1160	142	19038	1.01108e+83
GO:0006402	mRNA catabolic process	biological_process	0.36546	1	3	1160	35	19038	1.01107e+26
GO:0045095	keratin filament	cellular_component	0.36584	1	5	1160	66	19038	1.01116e+44
GO:0070566	adenylyltransferase activity	molecular_function	0.36617	1	2	1160	21	19038	1.01104e+17
GO:0042393	histone binding	molecular_function	0.36736	1	2	1160	21	19038	1.01117e+17
GO:0043112	receptor metabolic process	biological_process	0.36833	1	2	1160	21	19038	1.01107e+17
GO:0050661	NADP binding	molecular_function	0.36875	1	3	1160	36	19038	1.01114e+23
GO:0019104	DNA N-glycosylase activity	molecular_function	0.36943	1	1	1160	7	19038	101104015
GO:0008094	DNA-dependent ATPase activity	molecular_function	0.36984	1	4	1160	51	19038	1.01102e+35
GO:0005185	neurohypophyseal hormone activity	molecular_function	0.36992	1	1	1160	7	19038	121820202
GO:0003917	DNA topoisomerase type I activity	molecular_function	0.37051	1	1	1160	7	19038	101117137
GO:0071310	cellular response to organic substance	biological_process	0.37102	1	6	1160	80	19038	1.01105e+50
GO:0005201	extracellular matrix structural constituent	molecular_function	0.37424	1	3	1160	32	19038	101107183,XLOC_114822,101106322
GO:0019953	sexual reproduction	biological_process	0.37792	1	12	1160	172	19038	1.00886e+101
GO:0044702	single organism reproductive process	biological_process	0.37792	1	12	1160	172	19038	1.01109e+101
GO:0043281	regulation of cysteine-type endopeptidase activity involved in apoptotic process	biological_process	0.37874	1	2	1160	21	19038	1.14115e+17
GO:2000116	regulation of cysteine-type endopeptidase activity	biological_process	0.37874	1	2	1160	21	19038	1.14115e+17
GO:0016579	protein deubiquitination	biological_process	0.3802	1	5	1160	67	19038	1.14112e+44
GO:0070646	protein modification by small protein removal	biological_process	0.3802	1	5	1160	67	19038	1.14112e+44
GO:0006813	potassium ion transport	biological_process	0.38109	1	11	1160	158	19038	1.01118e+98
GO:0004180	carboxypeptidase activity	molecular_function	0.38218	1	3	1160	36	19038	1.01107e+26
GO:0044770	cell cycle phase transition	biological_process	0.3827	1	4	1160	52	19038	1.01119e+32
GO:1901987	regulation of cell cycle phase transition	biological_process	0.3827	1	4	1160	52	19038	1.0111e+32
GO:0010948	negative regulation of cell cycle process	biological_process	0.38288	1	4	1160	52	19038	1.01119e+32
GO:0031491	nucleosome binding	molecular_function	0.38358	1	2	1160	22	19038	1.01108e+17
GO:0006265	DNA topological change	biological_process	0.38479	1	4	1160	51	19038	1.0112e+35
GO:0030983	mismatched DNA binding	molecular_function	0.38594	1	2	1160	22	19038	1.01116e+17
GO:0005911	cell-cell junction	cellular_component	0.38722	1	2	1160	21	19038	1.01119e+17
GO:0044445	cytosolic part	cellular_component	0.38819	1	6	1160	83	19038	1.01117e+53
GO:0042578	phosphoric ester hydrolase activity	molecular_function	0.38834	1	26	1160	378	19038	101117204,101119587,101122928,101110890,101111928,100305130,101118488,101103681,101122744,101113628,101106237,101117497,101111654,101113286,101111237,101120569,101111299,105601857,101108572,101117510,101122126,443403,101114374,101114996,101121162,101113174
GO:0006405	RNA export from nucleus	biological_process	0.38869	1	3	1160	37	19038	101112008,XLOC_058935,101118709
GO:0003682	chromatin binding	molecular_function	0.38878	1	5	1160	66	19038	4.43549e+41
GO:0006505	GPI anchor metabolic process	biological_process	0.38955	1	4	1160	51	19038	1.01108e+35
GO:0010608	posttranscriptional regulation of gene expression	biological_process	0.39016	1	3	1160	37	19038	1.01102e+26
GO:0017025	TBP-class protein binding	molecular_function	0.39042	1	1	1160	8	19038	101106207
GO:0050497	transferase activity, transferring alkylthio groups	molecular_function	0.39047	1	1	1160	8	19038	101103472
GO:0050524	coenzyme-B sulfoethylthiotransferase activity	molecular_function	0.39047	1	1	1160	8	19038	101103472
GO:0001614	purinergic nucleotide receptor activity	molecular_function	0.39049	1	1	1160	8	19038	101118819
GO:0004931	extracellular ATP-gated cation channel activity	molecular_function	0.39049	1	1	1160	8	19038	101118819
GO:0014074	response to purine-containing compound	biological_process	0.39049	1	1	1160	8	19038	101118819
GO:0016502	nucleotide receptor activity	molecular_function	0.39049	1	1	1160	8	19038	101118819
GO:0033198	response to ATP	biological_process	0.39049	1	1	1160	8	19038	101118819
GO:0035381	ATP-gated ion channel activity	molecular_function	0.39049	1	1	1160	8	19038	101118819
GO:0035586	purinergic receptor activity	molecular_function	0.39049	1	1	1160	8	19038	101118819
GO:0046683	response to organophosphorus	biological_process	0.39049	1	1	1160	8	19038	101118819
GO:0031369	translation initiation factor binding	molecular_function	0.39091	1	1	1160	8	19038	101112694
GO:0045158	electron transporter, transferring electrons within cytochrome b6/f complex of photosystem II activity	molecular_function	0.39125	1	1	1160	8	19038	101103644
GO:0009611	response to wounding	biological_process	0.39174	1	12	1160	177	19038	101106373,100526781,101106681,XLOC_058935,101121559,101111752,101113971,100526788,443487,100294614,101117600,101121391
GO:0003906	DNA-(apurinic or apyrimidinic site) lyase activity	molecular_function	0.39297	1	1	1160	8	19038	101104015
GO:0006457	protein folding	biological_process	0.39316	1	9	1160	131	19038	101108864,101105938,101119947,XLOC_003276,100141297,101117753,101108981,101117567,101105054
GO:0007006	mitochondrial membrane organization	biological_process	0.39327	1	1	1160	8	19038	101108178
GO:0007160	cell-matrix adhesion	biological_process	0.39334	1	1	1160	8	19038	101107101
GO:0006551	leucine metabolic process	biological_process	0.39361	1	1	1160	8	19038	101105233
GO:0009098	leucine biosynthetic process	biological_process	0.39361	1	1	1160	8	19038	101105233
GO:0009260	ribonucleotide biosynthetic process	biological_process	0.39409	1	10	1160	144	19038	1.01104e+89
GO:0046390	ribose phosphate biosynthetic process	biological_process	0.39409	1	10	1160	144	19038	1.01112e+89
GO:0009916	alternative oxidase activity	molecular_function	0.39524	1	1	1160	8	19038	101117602
GO:0009403	toxin biosynthetic process	biological_process	0.39632	1	1	1160	8	19038	XLOC_058935
GO:0050794	regulation of cellular process	biological_process	0.39637	1	340	1160	5506	19038	101103500,101117476,101104912,101121581,114118738,105616456,105615925,101117971,114112680,101102200,101121774,XLOC_063735,101122214,443403,101123521,101117336,101105657,101113186,101106793,101111517,101121198,101118683,114118537,101117408,101102976,101116860,101110397,554255,101117537,101115800,100913158,554257,121816411,100302067,101117248,443465,101114097,101113294,XLOC_058935,101117598,1218164…
GO:0045735	nutrient reservoir activity	molecular_function	0.39671	1	2	1160	20	19038	1.01103e+17
GO:0016778	diphosphotransferase activity	molecular_function	0.39685	1	1	1160	8	19038	101117092
GO:0005813	centrosome	cellular_component	0.39734	1	1	1160	8	19038	101109312
GO:0006164	purine nucleotide biosynthetic process	biological_process	0.39741	1	10	1160	145	19038	1.01106e+89
GO:0071554	cell wall organization or biogenesis	biological_process	0.39806	1	2	1160	22	19038	101108572,XLOC_135037
GO:0015078	hydrogen ion transmembrane transporter activity	molecular_function	0.39823	1	20	1160	301	19038	114118018,114115304,100305130,106990653,101123332,101115005,101122198,101118455,101118929,114118902,101103774,105601988,105601990,114118023,101122445,XLOC_058935,101106080,443412,106991578,101103310
GO:0006582	melanin metabolic process	biological_process	0.39916	1	1	1160	8	19038	101107672
GO:0007608	sensory perception of smell	biological_process	0.40003	1	1	1160	8	19038	101122570
GO:0015934	large ribosomal subunit	cellular_component	0.4005	1	1	1160	8	19038	101103403
GO:0019208	phosphatase regulator activity	molecular_function	0.40276	1	2	1160	21	19038	1.01104e+17
GO:0050829	defense response to Gram-negative bacterium	biological_process	0.40354	1	1	1160	8	19038	101123125
GO:0006007	glucose catabolic process	biological_process	0.40361	1	3	1160	38	19038	1.0111e+26
GO:0019320	hexose catabolic process	biological_process	0.40361	1	3	1160	38	19038	1.0111e+26
GO:0033179	proton-transporting V-type ATPase, V0 domain	cellular_component	0.40372	1	4	1160	53	19038	443412,101122198,XLOC_058935,105601988
GO:0003922	GMP synthase (glutamine-hydrolyzing) activity	molecular_function	0.40555	1	1	1160	7	19038	101104979
GO:0006177	GMP biosynthetic process	biological_process	0.40555	1	1	1160	7	19038	101104979
GO:0046037	GMP metabolic process	biological_process	0.40555	1	1	1160	7	19038	101104979
GO:0006733	oxidoreduction coenzyme metabolic process	biological_process	0.40566	1	2	1160	23	19038	1.01103e+17
GO:0008053	mitochondrial fusion	biological_process	0.40629	1	2	1160	23	19038	1.01111e+17
GO:0003918	DNA topoisomerase type II (ATP-hydrolyzing) activity	molecular_function	0.40642	1	2	1160	23	19038	1.01112e+17
GO:0061505	DNA topoisomerase II activity	molecular_function	0.40642	1	2	1160	23	19038	1.0112e+17
GO:0042611	MHC protein complex	cellular_component	0.40702	1	2	1160	23	19038	1.06991e+17
GO:0042613	MHC class II protein complex	cellular_component	0.40702	1	2	1160	23	19038	1.06991e+17
GO:0009295	nucleoid	cellular_component	0.40734	1	1	1160	8	19038	101103644
GO:0004190	aspartic-type endopeptidase activity	molecular_function	0.40759	1	10	1160	148	19038	1.01102e+89
GO:0070001	aspartic-type peptidase activity	molecular_function	0.40759	1	10	1160	148	19038	1.01109e+89
GO:0008982	protein-N(PI)-phosphohistidine-sugar phosphotransferase activity	molecular_function	0.40787	1	1	1160	8	19038	101117137
GO:0010181	FMN binding	molecular_function	0.40842	1	2	1160	23	19038	101103752443533
GO:0016108	tetraterpenoid metabolic process	biological_process	0.40954	1	2	1160	23	19038	1.01118e+17
GO:0016109	tetraterpenoid biosynthetic process	biological_process	0.40954	1	2	1160	23	19038	1.01119e+17
GO:0016116	carotenoid metabolic process	biological_process	0.40954	1	2	1160	23	19038	1.01118e+17
GO:0016117	carotenoid biosynthetic process	biological_process	0.40954	1	2	1160	23	19038	1.01119e+17
GO:0042254	ribosome biogenesis	biological_process	0.40985	1	8	1160	117	19038	1.01109e+71
GO:0005829	cytosol	cellular_component	0.41004	1	6	1160	85	19038	1.01117e+53
GO:0009372	quorum sensing	biological_process	0.41165	1	1	1160	8	19038	101117137
GO:0048872	homeostasis of number of cells	biological_process	0.41165	1	1	1160	8	19038	101117137
GO:0048874	homeostasis of number of cells in a free-living population	biological_process	0.41165	1	1	1160	8	19038	101117137
GO:0017119	Golgi transport complex	cellular_component	0.41244	1	3	1160	37	19038	101113971,XLOC_056616,101111752
GO:0005996	monosaccharide metabolic process	biological_process	0.41281	1	8	1160	116	19038	1.00216e+71
GO:0016668	oxidoreductase activity, acting on a sulfur group of donors, NAD(P) as acceptor	molecular_function	0.41287	1	6	1160	85	19038	1.01107e+53
GO:0047134	protein-disulfide reductase activity	molecular_function	0.41287	1	6	1160	85	19038	1.14118e+53
GO:0034702	ion channel complex	cellular_component	0.41415	1	3	1160	38	19038	1.0112e+26
GO:0034703	cation channel complex	cellular_component	0.41415	1	3	1160	38	19038	1.0112e+26
GO:0046700	heterocycle catabolic process	biological_process	0.41444	1	8	1160	116	19038	XLOC_058935,101108714,101116406,101115927,101112185,101113553,101117432,101106973
GO:0007049	cell cycle	biological_process	0.41459	1	33	1160	515	19038	101117248,101115966,443155,106991578,101119002,114112842,114113008,101109312,101119694,100141296,101118709,114113147,497271,101113020,101110255,101106207,101123380,101104025,101123466,101112734,101114326,114109364,101117176,101106754,101106247,114113207,101105176,101108700,121817369,101106451,101111928,101122281,101117092
GO:0019028	viral capsid	cellular_component	0.41501	1	29	1160	452	19038	XLOC_063735,100294614,101112462,100141297,101123303,101110381,101117600,100568292,101110526,101111255,100526781,101111752,XLOC_058935,101108740,105601981,101107197,101108091,101113628,443487,100526782,101117614,121819509,105604590,114118018,101116666,100141296,100526788,114111226,101119604
GO:0006401	RNA catabolic process	biological_process	0.41502	1	3	1160	38	19038	1.01109e+26
GO:0007339	binding of sperm to zona pellucida	biological_process	0.41532	1	2	1160	20	19038	1.01108e+17
GO:0008037	cell recognition	biological_process	0.41532	1	2	1160	20	19038	1.01108e+17
GO:0009988	cell-cell recognition	biological_process	0.41532	1	2	1160	20	19038	1.01108e+17
GO:0035036	sperm-egg recognition	biological_process	0.41532	1	2	1160	20	19038	1.01114e+17
GO:0004797	thymidine kinase activity	molecular_function	0.4169	1	1	1160	8	19038	101119865
GO:0019136	deoxynucleoside kinase activity	molecular_function	0.4169	1	1	1160	8	19038	101119865
GO:0019206	nucleoside kinase activity	molecular_function	0.4169	1	1	1160	8	19038	101119865
GO:0006012	galactose metabolic process	biological_process	0.41737	1	1	1160	8	19038	105603785
GO:0008150	biological_process	biological_process	0.41833	1	868	1160	14189	19038	105601868,101122306,101120620,101123078,101103913,121818084,101108765,114109640,443111,114118251,100145870,101111652,101123632,101117303,114111619,101114119,101107229,101119002,105614936,106991540,101116598,101111561,101109211,114118318,101109936,101120591,105605921,101119854,780448,101121855,105601948,101102752,101120134,114112118,114109364,101104278,101105777,101115572,101115569,101103472,10110…
GO:0001871	pattern binding	molecular_function	0.41872	1	3	1160	39	19038	1.01118e+26
GO:0030247	polysaccharide binding	molecular_function	0.41872	1	3	1160	39	19038	1.01109e+26
GO:0042126	nitrate metabolic process	biological_process	0.42071	1	1	1160	8	19038	101118054
GO:0042128	nitrate assimilation	biological_process	0.42071	1	1	1160	8	19038	101118054
GO:2001057	reactive nitrogen species metabolic process	biological_process	0.42071	1	1	1160	8	19038	101118054
GO:0016831	carboxy-lyase activity	molecular_function	0.42083	1	6	1160	83	19038	1.00038e+53
GO:0009142	nucleoside triphosphate biosynthetic process	biological_process	0.42092	1	6	1160	86	19038	1.01106e+53
GO:0009145	purine nucleoside triphosphate biosynthetic process	biological_process	0.42092	1	6	1160	86	19038	1.01115e+53
GO:0009201	ribonucleoside triphosphate biosynthetic process	biological_process	0.42092	1	6	1160	86	19038	1.00305e+53
GO:0009206	purine ribonucleoside triphosphate biosynthetic process	biological_process	0.42092	1	6	1160	86	19038	1.01106e+53
GO:0006793	phosphorus metabolic process	biological_process	0.42263	1	79	1160	1245	19038	101122739,101111299,XLOC_058935,101106456,105605648,101118367,101121162,101117248,101121391,101116640,101109574,101105428,101117510,101103094,101123008,114115304,101104881,101119197,100127210,101102746,101117614,101111654,101102453,101106493,101105786,101111281,101104888,101106160,101115891,101111683,101113438,101118488,101107611,101107723,101116406,101122186,101108265,101116114,101110313,1011227…
GO:0006468	protein phosphorylation	biological_process	0.42366	1	40	1160	622	19038	101103094,101117248,101105428,101109574,101121391,101123635,101116052,101120569,101122739,105605648,101106456,101108969,100217411,101122306,101102746,101104881,554326,100127210,101108308,101120630,101123008,101120826,101111281,XLOC_135037,114109630,101104888,101105786,101107639,101106493,101104774,114117899,100194428,101107630,101122744,101108265,101122186,101123003,101116114,101103762,101122928
GO:0044270	cellular nitrogen compound catabolic process	biological_process	0.42367	1	8	1160	117	19038	101106973,101117432,101113553,101115927,101116406,101112185,XLOC_058935,101108714
GO:0006664	glycolipid metabolic process	biological_process	0.42439	1	5	1160	66	19038	1.01106e+44
GO:0050909	sensory perception of taste	biological_process	0.42439	1	4	1160	55	19038	1.01117e+35
GO:0006644	phospholipid metabolic process	biological_process	0.42672	1	9	1160	130	19038	1.01118e+80
GO:0040013	negative regulation of locomotion	biological_process	0.42679	1	1	1160	9	19038	101110255
GO:0051271	negative regulation of cellular component movement	biological_process	0.42679	1	1	1160	9	19038	101110255
GO:2000146	negative regulation of cell motility	biological_process	0.42679	1	1	1160	9	19038	101110255
GO:0005351	sugar:hydrogen symporter activity	molecular_function	0.42715	1	1	1160	9	19038	101113155
GO:0015295	solute:hydrogen symporter activity	molecular_function	0.42715	1	1	1160	9	19038	101113155
GO:0001076	RNA polymerase II transcription factor binding transcription factor activity	molecular_function	0.42722	1	10	1160	148	19038	1.01103e+86
GO:0001104	RNA polymerase II transcription cofactor activity	molecular_function	0.42722	1	10	1160	148	19038	4.43469e+86
GO:0042162	telomeric DNA binding	molecular_function	0.42727	1	1	1160	9	19038	114112248
GO:0006739	NADP metabolic process	biological_process	0.42733	1	1	1160	9	19038	101110313
GO:0044441	cilium part	cellular_component	0.42733	1	1	1160	9	19038	101123466
GO:0051090	regulation of sequence-specific DNA binding transcription factor activity	biological_process	0.42746	1	1	1160	9	19038	101108511
GO:0004558	alpha-glucosidase activity	molecular_function	0.42764	1	1	1160	9	19038	101115827
GO:0004564	beta-fructofuranosidase activity	molecular_function	0.42764	1	1	1160	9	19038	101115827
GO:0004575	sucrose alpha-glucosidase activity	molecular_function	0.42764	1	1	1160	9	19038	101115827
GO:0015926	glucosidase activity	molecular_function	0.42764	1	1	1160	9	19038	101115827
GO:0007052	mitotic spindle organization	biological_process	0.42774	1	1	1160	9	19038	101109312
GO:0018143	nucleic acid-protein covalent cross-linking	biological_process	0.4286	1	1	1160	9	19038	101123336
GO:0005885	Arp2/3 protein complex	cellular_component	0.42861	1	1	1160	9	19038	105601868
GO:0007217	tachykinin receptor signaling pathway	biological_process	0.42888	1	1	1160	9	19038	XLOC_038652
GO:0004806	triglyceride lipase activity	molecular_function	0.42943	1	1	1160	9	19038	101105505
GO:0005247	voltage-gated chloride channel activity	molecular_function	0.42964	1	1	1160	9	19038	101111082
GO:0005254	chloride channel activity	molecular_function	0.42964	1	1	1160	9	19038	101111082
GO:0008308	voltage-gated anion channel activity	molecular_function	0.42964	1	1	1160	9	19038	101111082
GO:0015108	chloride transmembrane transporter activity	molecular_function	0.42964	1	1	1160	9	19038	101111082
GO:0003995	acyl-CoA dehydrogenase activity	molecular_function	0.4309	1	2	1160	24	19038	1.01122e+17
GO:0019400	alditol metabolic process	biological_process	0.43106	1	1	1160	9	19038	101122194
GO:0009401	phosphoenolpyruvate-dependent sugar phosphotransferase system	biological_process	0.43155	1	2	1160	23	19038	1.01117e+17
GO:0044212	transcription regulatory region DNA binding	molecular_function	0.43274	1	1	1160	9	19038	101107196
GO:0019076	viral release from host cell	biological_process	0.43337	1	2	1160	24	19038	1.01108e+17
GO:0017069	snRNA binding	molecular_function	0.43381	1	1	1160	9	19038	114118018
GO:0016491	oxidoreductase activity	molecular_function	0.43384	1	87	1160	1397	19038	101112008,105614373,114115283,101111306,101119865,101107229,101107532,114118023,101112942,101123635,101107382,101120814,101119144,101103774,101120296,101105646,101115005,114111226,105605903,105605808,101108864,101107763,101117221,106991186,101109765,100142657,101110118,101107639,105601990,101121662,101104266,101122545,101122542,101109936,101120808,101106419,105614340,114118024,100415906,XLOC_0604…
GO:0008242	omega peptidase activity	molecular_function	0.43532	1	2	1160	24	19038	1.01115e+17
GO:0007631	feeding behavior	biological_process	0.43675	1	2	1160	24	19038	1.1411e+17
GO:0000003	reproduction	biological_process	0.43698	1	31	1160	486	19038	101111396,114118018,101104204,101118939,443168,101118903,101107723,101122281,101122692,101111928,100141296,101118709,101121337,101113628,100885767,101102351,101108195,105602047,101107052,106992025,101108788,101104774,101106754,101108026,101109765,101117176,106991578,114118022,443469,101108435,101104025
GO:0070603	SWI/SNF superfamily-type complex	cellular_component	0.43703	1	1	1160	9	19038	101106673
GO:0006493	protein O-linked glycosylation	biological_process	0.43748	1	1	1160	9	19038	101107630
GO:0005234	extracellular-glutamate-gated ion channel activity	molecular_function	0.43776	1	2	1160	20	19038	1.01106e+17
GO:0070647	protein modification by small protein conjugation or removal	biological_process	0.43826	1	9	1160	136	19038	1.01114e+80
GO:0006796	phosphate-containing compound metabolic process	biological_process	0.43848	1	78	1160	1234	19038	101120826,100305130,101120630,101108308,554326,101104979,100270715,101117497,101102696,101122306,101108969,101123332,100217411,101105646,101115005,101119865,101106080,101111237,101120569,101116052,101123635,101114374,121819509,101122928,101103762,101117092,101104433,101123003,101120808,100194428,101107630,114117899,101104774,101107639,101119460,101117432,XLOC_135037,114109630,101123008,100127210,…
GO:0044550	secondary metabolite biosynthetic process	biological_process	0.43904	1	2	1160	24	19038	XLOC_058935,101107672
GO:0017038	protein import	biological_process	0.43959	1	10	1160	152	19038	1.00141e+86
GO:0034464	BBSome	cellular_component	0.43966	1	1	1160	9	19038	105603509
GO:0019321	pentose metabolic process	biological_process	0.4408	1	1	1160	9	19038	101110313
GO:0005261	cation channel activity	molecular_function	0.4414	1	17	1160	261	19038	1.01109e+149
GO:0051168	nuclear export	biological_process	0.44166	1	3	1160	40	19038	101112008,XLOC_058935,101118709
GO:0043933	macromolecular complex subunit organization	biological_process	0.44213	1	35	1160	556	19038	101102499,101118939,100526788,101111928,101121445,101103644,443487,101104558,101106451,101118623,101101940,101106373,101106681,100294614,443403,XLOC_135037,101115572,XLOC_024284,101111964,105601868,101107566,114112844,100526781,114111225,114111619,101109312,101113971,101111752,101108714,101121559,XLOC_058935,101115966,101114679,101117600,101121391
GO:0003006	developmental process involved in reproduction	biological_process	0.44317	1	7	1160	103	19038	4.43168e+56
GO:0016655	oxidoreductase activity, acting on NAD(P)H, quinone or similar compound as acceptor	molecular_function	0.44476	1	5	1160	71	19038	1.01122e+44
GO:0055082	cellular chemical homeostasis	biological_process	0.4462	1	6	1160	87	19038	1.01122e+53
GO:0043565	sequence-specific DNA binding	molecular_function	0.4469	1	32	1160	506	19038	101121532,101103403,101103500,101107196,101121774,101110302,443412,100286739,101104051,114109630,100913151,101106355,101117176,101105646,101114446,101116889,101104745,100192428,101116021,114112673,105610483,114118019,101122692,101112462,106991578,101116986,101103750,101111888,101119014,114112248,101112071,100171394
GO:0005326	neurotransmitter transporter activity	molecular_function	0.44792	1	2	1160	25	19038	101116078443491
GO:0005328	neurotransmitter:sodium symporter activity	molecular_function	0.44792	1	2	1160	25	19038	101116078443491
GO:0004721	phosphoprotein phosphatase activity	molecular_function	0.44856	1	9	1160	130	19038	1.01111e+80
GO:0016568	chromatin modification	biological_process	0.44925	1	5	1160	71	19038	1.01105e+41
GO:0019239	deaminase activity	molecular_function	0.44935	1	2	1160	25	19038	1.01107e+17
GO:0016747	transferase activity, transferring acyl groups other than amino-acyl groups	molecular_function	0.44943	1	11	1160	169	19038	1.01117e+95
GO:0030312	external encapsulating structure	cellular_component	0.4495	1	9	1160	136	19038	1.01119e+71
GO:0000794	condensed nuclear chromosome	cellular_component	0.45047	1	6	1160	87	19038	1.0112e+50
GO:0016746	transferase activity, transferring acyl groups	molecular_function	0.4505	1	17	1160	266	19038	101109916,101117792,101111638,443531,101122246,101107723,121817902,101110423,XLOC_135037,101102449,101117221,105601853,101114511,101105386,101106629,121817901,101117229
GO:0042470	melanosome	cellular_component	0.45142	1	1	1160	9	19038	101117742
GO:0048770	pigment granule	cellular_component	0.45142	1	1	1160	9	19038	101117742
GO:0004611	phosphoenolpyruvate carboxykinase activity	molecular_function	0.45216	1	1	1160	9	19038	100037690
GO:0046365	monosaccharide catabolic process	biological_process	0.45249	1	3	1160	41	19038	1.00216e+26
GO:0031023	microtubule organizing center organization	biological_process	0.45303	1	3	1160	39	19038	1.01112e+26
GO:0006996	organelle organization	biological_process	0.45451	1	62	1160	992	19038	497271,101116921,101101948,101111749,101103913,101120069,101104745,101113077,101115676,XLOC_024284,105601868,101115005,101117598,101108714,XLOC_058935,101117137,101102359,101117983,101109312,114111619,101102196,101108178,101104858,114112844,114111225,101116052,101108038,101106365,101117510,106991578,101102095,101115966,101111928,101121445,101103644,114110552,101101901,101120683,101112005,10111139…
[truncated: 1,385 more rows]

## Sheet: HUS vs CSH
GO_accession	Description	Term_type	Over_represented_pValue	Corrected_pValue	CAD_item	CAD_list	Bg_item	Bg_list	Gene_names
[truncated: 2,452 more rows]
