# Supplementary material for: Transcriptome sequencing unveils a novel mechanism underlying breed distinctions between thin- and fat-tailed sheep
Source: Research Square preprint supplement (doi:10.21203/rs.3.rs-6146587/v1), 2025-03-06
Supplement: Supplementary file 2 [file 8472cf1d2883165ac401d63c.xlsx]

## Sheet: SFK_vs_CSH.DEG_KEGG_pathway_enr
##Databases: KEGG PATHWAY
##Statistical test method: hypergeometric test / Fisher's exact test
##FDR correction method: Benjamini and Hochberg
#Term	Database	ID	Input number	Background number	P-Value	Corrected P-Value	Input	Hyperlink
Valine, leucine and isoleucine degradation	KEGG PATHWAY	bta00280	16	46	3.49047e-05	0.00911013	101105462|101118798|101112867|101113789|101122731|101104808|101120981|101102177|101106176|101122862|101113856|101102606|443450|101108127|101113939|101110625	http://www.genome.jp/kegg-bin/show_pathway?bta00280/bta:513967%09red/bta:280871%09red/bta:504301%09red/bta:507477%09red/bta:535804%09red/bta:280759%09red/bta:280969%09red/bta:327692%09red/bta:518393%09red/bta:281748%09red/bta:532785%09red/bta:512070%09red/bta:281643%09red/bta:508324%09red/bta:510440%09red/bta:282150%09red
AMPK signaling pathway	KEGG PATHWAY	bta04152	27	124	0.00012503	0.0115781	101107621|101111426|106991367|101117264|443264|101103267|100170327|101114816|100169940|101119242|443185|101115115|100169699|100534656|100037690|101113586|101116044|100144763|101112976|443434|100127210|101102230|443318|100329218|443193|443186|101110626	http://www.genome.jp/kegg-bin/show_pathway?bta04152/bta:509459%09red/bta:539361%09red/bta:100300012%09red/bta:509200%09red/bta:281152%09red/bta:281590%09red/bta:509084%09red/bta:533788%09red/bta:497205%09red/bta:282134%09red/bta:534928%09red/bta:509613%09red/bta:407234%09red/bta:534923%09red/bta:281239%09red/bta:282855%09red/bta:281052%09red/bta:538954%09red/bta:515338%09red/bta:534129%09red/bta:…
PPAR signaling pathway	KEGG PATHWAY	bta03320	19	71	0.000133081	0.0115781	101117285|494434|101108576|101111781|443185|101120355|101111845|101104743|101115115|101104317|443408|443193|443434|101110905|101117785|101108615|100037690|101110625|101102230	http://www.genome.jp/kegg-bin/show_pathway?bta03320/bta:509459%09red/bta:535727%09red/bta:282855%09red/bta:100848085%09red/bta:281052%09red/bta:509500%09red/bta:506812%09red/bta:281631%09red/bta:537062%09red/bta:536628%09red/bta:280924%09red/bta:537161%09red/bta:280843%09red/bta:509963%09red/bta:281561%09red/bta:521822%09red/bta:508918%09red/bta:508324%09red
Retinol metabolism	KEGG PATHWAY	bta00830	16	57	0.000280037	0.0182724	114115283|442993|114117814|443343|101104808|100534643|100534646|101105400|101123106|100534645|101117509|101115797|101109288|101116487|100302354|101121875	http://www.genome.jp/kegg-bin/show_pathway?bta00830/bta:510551%09red/bta:526726%09red/bta:533086%09red/bta:535075%09red/bta:614455%09red/bta:504769%09red/bta:286792%09red/bta:281615%09red/bta:281482%09red/bta:751790%09red/bta:534696%09red/bta:518393%09red/bta:282852%09red/bta:369021%09red
Fatty acid metabolism	KEGG PATHWAY	bta01212	14	47	0.000401414	0.0209538	100170327|101122862|101114816|443186|101111781|443185|443193|101112867|101108615|443434|101110905|101102606|101121049|101110625	http://www.genome.jp/kegg-bin/show_pathway?bta01212/bta:521822%09red/bta:509459%09red/bta:504301%09red/bta:281590%09red/bta:532785%09red/bta:506812%09red/bta:281421%09red/bta:536628%09red/bta:281152%09red/bta:537161%09red/bta:280924%09red/bta:515338%09red/bta:281748%09red/bta:508324%09red
Drug metabolism - cytochrome P450	KEGG PATHWAY	bta00982	15	57	0.000757779	0.0328611	443054|101109831|101107232|114115283|442993|101104808|101109936|100534646|101116273|100534645|100534643|114116333|101104165|101108092|101107831	http://www.genome.jp/kegg-bin/show_pathway?bta00982/bta:510551%09red/bta:615514%09red/bta:281167%09red/bta:533917%09red/bta:788719%09red/bta:286792%09red/bta:785216%09red/bta:507093%09red/bta:777644%09red/bta:327709%09red/bta:518393%09red/bta:751790%09red
Metabolism of xenobiotics by cytochrome P450	KEGG PATHWAY	bta00980	15	58	0.000881333	0.0328611	443054|101109831|101107232|114115283|442993|101111038|100534646|101116273|443409|100534645|100534643|114116333|101114663|101108092|101107831	http://www.genome.jp/kegg-bin/show_pathway?bta00980/bta:510551%09red/bta:535293%09red/bta:615514%09red/bta:533917%09red/bta:286792%09red/bta:785216%09red/bta:507093%09red/bta:282589%09red/bta:777644%09red/bta:327709%09red/bta:515946%09red/bta:751790%09red
Fatty acid degradation	KEGG PATHWAY	bta00071	12	42	0.00138052	0.0450394	114115283|101115592|101122862|101112867|101111781|443193|101118798|443434|101110905|101102606|101108127|101110625	http://www.genome.jp/kegg-bin/show_pathway?bta00071/bta:510551%09red/bta:513967%09red/bta:509459%09red/bta:504301%09red/bta:507477%09red/bta:506812%09red/bta:535174%09red/bta:536628%09red/bta:537161%09red/bta:532785%09red/bta:281748%09red/bta:508324%09red
Chemical carcinogenesis	KEGG PATHWAY	bta05204	16	69	0.00161392	0.0468038	443054|101109831|101107232|114115283|442993|101107831|101111038|100534646|101116273|443409|100534645|114117814|114116333|101114663|101108092|100534643	http://www.genome.jp/kegg-bin/show_pathway?bta05204/bta:510551%09red/bta:535293%09red/bta:615514%09red/bta:533917%09red/bta:286792%09red/bta:785216%09red/bta:507093%09red/bta:504769%09red/bta:282589%09red/bta:777644%09red/bta:327709%09red/bta:515946%09red/bta:751790%09red
ECM-receptor interaction	KEGG PATHWAY	bta04512	18	85	0.00205509	0.0536378	101122429|443209|101123066|101119919|101118494|105608408|443058|101106520|101115211|100820740|101116784|100216328|101106719|101105162|101115115|101115805|101105743|101102230	http://www.genome.jp/kegg-bin/show_pathway?bta04512/bta:282644%09red/bta:541281%09red/bta:520167%09red/bta:281052%09red/bta:508632%09red/bta:282654%09red/bta:520030%09red/bta:518914%09red/bta:523755%09red/bta:511043%09red/bta:100336616%09red/bta:281499%09red/bta:281069%09red/bta:504323%09red/bta:785805%09red/bta:506995%09red
Ascorbate and aldarate metabolism	KEGG PATHWAY	bta00053	8	22	0.00254956	0.060494	101118798|442993|100534646|101114271|100534645|100534643|100171395|101108127	http://www.genome.jp/kegg-bin/show_pathway?bta00053/bta:513967%09red/bta:507477%09red/bta:286792%09red/bta:280910%09red/bta:751790%09red/bta:281564%09red
Butanoate metabolism	KEGG PATHWAY	bta00650	9	28	0.00278653	0.060607	101120131|101102177|101105462|101112867|101121307|101120375|101122862|101104112|101112785	http://www.genome.jp/kegg-bin/show_pathway?bta00650/bta:534090%09red/bta:512227%09red/bta:532785%09red/bta:535804%09red/bta:280969%09red/bta:100298888%09red/bta:281748%09red/bta:533798%09red/bta:282576%09red
Pentose and glucuronate interconversions	KEGG PATHWAY	bta00040	9	30	0.00408091	0.0788497	101108802|101118798|442993|101115280|105606262|100534646|101114271|100534645|100534643	http://www.genome.jp/kegg-bin/show_pathway?bta00040/bta:513967%09red/bta:508954%09red/bta:100852322%09red/bta:286792%09red/bta:515687%09red/bta:751790%09red/bta:281564%09red
Adipocytokine signaling pathway	KEGG PATHWAY	bta04920	15	71	0.004749	0.0788497	101103267|100037690|101119242|106991367|101111781|101110905|443461|101111845|443193|101115115|443434|101116044|100127210|443264|101102230	http://www.genome.jp/kegg-bin/show_pathway?bta04920/bta:282855%09red/bta:509459%09red/bta:497205%09red/bta:282356%09red/bta:281052%09red/bta:407234%09red/bta:509500%09red/bta:100300012%09red/bta:506812%09red/bta:536628%09red/bta:537161%09red/bta:538954%09red/bta:534923%09red/bta:509084%09red
Axon guidance	KEGG PATHWAY	bta04360	22	124	0.00482616	0.0788497	101103800|101113454|101106389|101111871|101110391|780511|101119989|105607800|101115792|101109148|101104121|101112777|100125613|101121716|100125611|101120475|106991715|101118946|101118654|101103596|443076|101114604	http://www.genome.jp/kegg-bin/show_pathway?bta04360/bta:100337226%09red/bta:506037%09red/bta:536815%09red/bta:522767%09red/bta:534526%09red/bta:537455%09red/bta:540756%09red/bta:616742%09red/bta:510140%09red/bta:520004%09red/bta:512660%09red/bta:534164%09red/bta:785942%09red/bta:537176%09red/bta:539452%09red/bta:540907%09red/bta:280855%09red/bta:539996%09red/bta:510761%09red/bta:282041%09red/bta:…
Propanoate metabolism	KEGG PATHWAY	bta00640	8	25	0.0048337	0.0788497	101105462|101103801|101114816|443186|101122731|101106176|101112867|101114126	http://www.genome.jp/kegg-bin/show_pathway?bta00640/bta:280871%09red/bta:531552%09red/bta:280969%09red/bta:327692%09red/bta:281590%09red/bta:515338%09red/bta:281748%09red/bta:506459%09red
Porphyrin and chlorophyll metabolism	KEGG PATHWAY	bta00860	9	36	0.0108684	0.161563	101108802|443053|101118353|101105869|100534646|442993|100534645|100534643|101121993	http://www.genome.jp/kegg-bin/show_pathway?bta00860/bta:504596%09red/bta:286792%09red/bta:613425%09red/bta:515687%09red/bta:514194%09red/bta:526230%09red/bta:751790%09red
Glycerolipid metabolism	KEGG PATHWAY	bta00561	12	57	0.0111423	0.161563	101118798|101112654|101117659|101111235|101114659|101123166|101119394|101102020|443408|101120972|101108127|101120647	http://www.genome.jp/kegg-bin/show_pathway?bta00561/bta:497202%09red/bta:513967%09red/bta:541284%09red/bta:786474%09red/bta:507456%09red/bta:507477%09red/bta:518523%09red/bta:537224%09red/bta:519739%09red/bta:508493%09red/bta:280843%09red/bta:617707%09red
Fatty acid biosynthesis	KEGG PATHWAY	bta00061	5	13	0.0136942	0.188115	443186|101111781|100170327|101114816|101110905	http://www.genome.jp/kegg-bin/show_pathway?bta00061/bta:515338%09red/bta:536628%09red/bta:281152%09red/bta:281590%09red/bta:537161%09red
cAMP signaling pathway	KEGG PATHWAY	bta04024	29	199	0.0149944	0.195677	101111396|101103800|101123436|106991715|101117327|101118870|443528|101105703|101103544|100233164|101106989|101119242|101102089|101117275|100169699|101121046|443361|101119758|114117324|101113586|101108767|101112976|101102014|443274|101106534|101112196|101114783|443218|101109816	http://www.genome.jp/kegg-bin/show_pathway?bta04024/bta:519037%09red/bta:538759%09red/bta:613800%09red/bta:525416%09red/bta:280795%09red/bta:540830%09red/bta:282133%09red/bta:534923%09red/bta:513010%09red/bta:281701%09red/bta:515333%09red/bta:281604%09red/bta:504813%09red/bta:281601%09red/bta:408013%09red/bta:534129%09red/bta:282146%09red/bta:533048%09red/bta:101909126%09red/bta:517040%09red/bta:…
Malaria	KEGG PATHWAY	bta05144	11	53	0.0160296	0.199225	101112563|443045|443206|101114226|101115115|101115211|101116784|101113636|443076|100303608|101102230	http://www.genome.jp/kegg-bin/show_pathway?bta05144/bta:280855%09red/bta:541281%09red/bta:281249%09red/bta:281052%09red/bta:282118%09red/bta:534578%09red/bta:504323%09red/bta:282303%09red/bta:281839%09red
Salivary secretion	KEGG PATHWAY	bta04970	15	84	0.0170339	0.202084	105601930|114117324|100137068|101104339|100169940|101102089|101104079|101111289|101117327|443251|443528|101121046|101116575|100270685|101103585	http://www.genome.jp/kegg-bin/show_pathway?bta04970/bta:614878%09red/bta:287026%09red/bta:510708%09red/bta:539899%09red/bta:282134%09red/bta:404104%09red/bta:281604%09red/bta:616757%09red/bta:281601%09red/bta:282573%09red/bta:281102%09red/bta:613800%09red/bta:613600%09red/bta:282146%09red/bta:782368%09red
Arrhythmogenic right ventricular cardiomyopathy (ARVC)	KEGG PATHWAY	bta05412	13	69	0.0178461	0.202515	101105970|100170321|101118655|101108767|101104733|101116192|101119169|101122427|101105162|101117308|443209|101110347|101119919	http://www.genome.jp/kegg-bin/show_pathway?bta05412/bta:523755%09red/bta:282644%09red/bta:506995%09red/bta:508151%09red/bta:537784%09red/bta:281062%09red/bta:286800%09red/bta:538496%09red/bta:280765%09red/bta:408013%09red/bta:281128%09red/bta:514360%09red/bta:519331%09red
ABC transporters	KEGG PATHWAY	bta02010	9	42	0.0238475	0.254806	101106534|101121769|101115292|101115808|101107561|101116568|101108240|121819507|101107781	http://www.genome.jp/kegg-bin/show_pathway?bta02010/bta:100336913%09red/bta:504909%09red/bta:515333%09red/bta:504278%09red/bta:510497%09red/bta:281584%09red/bta:536724%09red/bta:511762%09red
Steroid hormone biosynthesis	KEGG PATHWAY	bta00140	11	57	0.0244067	0.254806	101122543|114117814|100913161|101120331|443409|100534646|101105400|442993|100534645|100534643|114108656	http://www.genome.jp/kegg-bin/show_pathway?bta00140/bta:533086%09red/bta:100337056%09red/bta:515710%09red/bta:286792%09red/bta:280934%09red/bta:504769%09red/bta:531192%09red/bta:282589%09red/bta:751790%09red
Focal adhesion	KEGG PATHWAY	bta04510	28	206	0.0338432	0.319206	101103800|101118494|101115211|101116784|443245|101106719|101105162|101115805|101110391|443088|101112600|443209|101119242|100820740|101102873|101119919|101110241|101104655|105608408|100144763|100216328|443318|443058|101106520|100147799|443076|101122429|101105743	http://www.genome.jp/kegg-bin/show_pathway?bta04510/bta:541281%09red/bta:520167%09red/bta:282654%09red/bta:520030%09red/bta:534526%09red/bta:281499%09red/bta:281069%09red/bta:518914%09red/bta:503620%09red/bta:524734%09red/bta:282644%09red/bta:523755%09red/bta:528415%09red/bta:534923%09red/bta:615414%09red/bta:281239%09red/bta:511043%09red/bta:286799%09red/bta:508632%09red/bta:785805%09red/bta:504…
Oxytocin signaling pathway	KEGG PATHWAY	bta04921	22	153	0.0346704	0.319206	101116150|101104339|101103800|101123436|106991715|101117327|101118870|101103267|101106197|101119495|101102089|101110347|101103585|101108767|100144763|101111289|100127210|443390|101105970|443218|101103450|101122427	http://www.genome.jp/kegg-bin/show_pathway?bta04921/bta:538496%09red/bta:286800%09red/bta:525416%09red/bta:280795%09red/bta:509084%09red/bta:287026%09red/bta:280888%09red/bta:531209%09red/bta:538954%09red/bta:519331%09red/bta:508029%09red/bta:281601%09red/bta:408013%09red/bta:613600%09red/bta:533048%09red/bta:510708%09red/bta:540740%09red/bta:282041%09red/bta:524530%09red/bta:539899%09red/bta:281…
Pyruvate metabolism	KEGG PATHWAY	bta00620	8	38	0.0347917	0.319206	101118798|101114816|443186|105608759|101102520|101114126|101108127|100037690	http://www.genome.jp/kegg-bin/show_pathway?bta00620/bta:513967%09red/bta:540335%09red/bta:767889%09red/bta:282855%09red/bta:507477%09red/bta:281590%09red/bta:515338%09red/bta:506459%09red
PI3K-Akt signaling pathway	KEGG PATHWAY	bta04151	43	346	0.0354674	0.319206	101113991|101111426|101114584|101107121|101117264|101118494|101115211|101122429|101116784|443245|101106719|101105162|101112600|443088|443209|101119242|101113586|100820740|443346|101115792|100192421|101102873|105608408|101113222|100144763|101112976|101107460|443076|100216328|100127210|780504|100037690|101119606|780460|443318|443058|101106520|101111138|101119919|100147799|497271|101115805|101105743	http://www.genome.jp/kegg-bin/show_pathway?bta04151/bta:532829%09red/bta:541281%09red/bta:520167%09red/bta:282654%09red/bta:520030%09red/bta:533929%09red/bta:281136%09red/bta:281069%09red/bta:281499%09red/bta:503620%09red/bta:617915%09red/bta:533788%09red/bta:616742%09red/bta:100299249%09red/bta:282644%09red/bta:518914%09red/bta:523755%09red/bta:509613%09red/bta:538954%09red/bta:534923%09red/bta:…
Wnt signaling pathway	KEGG PATHWAY	bta04310	20	138	0.0399376	0.347457	101109845|101123633|101121066|101123636|100192317|101104664|101103800|100144763|101121415|101123374|101113129|101118870|101109518|101106600|101107858|100147799|114118764|100302355|101122197|101103585	http://www.genome.jp/kegg-bin/show_pathway?bta04310/bta:287026%09red/bta:540179%09red/bta:533233%09red/bta:518004%09red/bta:282041%09red/bta:286794%09red/bta:282069%09red/bta:282068%09red/bta:524530%09red/bta:541161%09red/bta:510821%09red/bta:522467%09red/bta:508008%09red/bta:513742%09red/bta:525416%09red/bta:789390%09red/bta:539337%09red/bta:445418%09red/bta:615414%09red
Metabolic pathways	KEGG PATHWAY	bta01100	132	1239	0.0446293	0.37575	114110625|101113594|101103801|101114659|101106116|101111781|101116176|105610140|101105703|101117677|100337686|101117285|101114816|101120283|443544|101120124|101105869|101102606|101121049|100037690|101113196|101114663|101108314|101122731|101112819|101115615|101114271|101116418|101120131|100534646|100036762|100534645|100534643|100171395|101103923|101116487|106990363|101116150|101122238|101121984|10…	http://www.genome.jp/kegg-bin/show_pathway?bta01100/bta:541284%09red/bta:615813%09red/bta:518974%09red/bta:281779%09red/bta:537161%09red/bta:540771%09red/bta:617031%09red/bta:504769%09red/bta:534090%09red/bta:282073%09red/bta:281482%09red/bta:281781%09red/bta:616109%09red/bta:508918%09red/bta:506459%09red/bta:508324%09red/bta:509566%09red/bta:507456%09red/bta:286792%09red/bta:536409%09red/bta:539…
Renin-angiotensin system	KEGG PATHWAY	bta04614	5	20	0.0523608	0.427068	101117763|101123582|443335|101103622|105613829	http://www.genome.jp/kegg-bin/show_pathway?bta04614/bta:100295485%09red/bta:407157%09red/bta:504350%09red/bta:538650%09red/bta:509235%09red
Protein digestion and absorption	KEGG PATHWAY	bta04974	13	83	0.0554668	0.438084	100170324|101120758|494437|101116778|101118494|101103622|101119401|101111950|443514|100302549|101102453|101115805|101112329	http://www.genome.jp/kegg-bin/show_pathway?bta04974/bta:407112%09red/bta:282353%09red/bta:100139730%09red/bta:281122%09red/bta:521058%09red/bta:508632%09red/bta:535601%09red/bta:507107%09red/bta:781493%09red/bta:508222%09red/bta:282355%09red/bta:785805%09red/bta:509235%09red
Complement and coagulation cascades	KEGG PATHWAY	bta04610	12	75	0.0570684	0.438084	101117258|101115321|101112329|101102931|101102336|101114941|101105026|101114204|101112066|101108612|101107430|101122940	http://www.genome.jp/kegg-bin/show_pathway?bta04610/bta:513856%09red/bta:617881%09red/bta:507706%09red/bta:507339%09red/bta:526766%09red/bta:280897%09red/bta:515440%09red/bta:510522%09red/bta:508222%09red/bta:280816%09red/bta:282522%09red/bta:281652%09red
Glycine, serine and threonine metabolism	KEGG PATHWAY	bta00260	8	43	0.0590145	0.44008	101113594|101106116|100174904|443544|101102469|101120772|101111328|101108127	http://www.genome.jp/kegg-bin/show_pathway?bta00260/bta:414732%09red/bta:509002%09red/bta:319141%09red/bta:507477%09red/bta:317723%09red/bta:505103%09red/bta:504453%09red/bta:505218%09red
Adrenergic signaling in cardiomyocytes	KEGG PATHWAY	bta04261	20	146	0.0611515	0.443348	101105970|114117324|101113586|100169940|101119242|101102089|101117264|101113622|106991715|101112976|101117327|101108767|101118870|101122427|443528|101121046|443335|101112196|101110347|101103585	http://www.genome.jp/kegg-bin/show_pathway?bta04261/bta:538100%09red/bta:513010%09red/bta:287026%09red/bta:533788%09red/bta:510708%09red/bta:525416%09red/bta:286800%09red/bta:281601%09red/bta:282134%09red/bta:538496%09red/bta:281791%09red/bta:281604%09red/bta:613800%09red/bta:282146%09red/bta:408013%09red/bta:407157%09red/bta:534923%09red/bta:534129%09red/bta:537312%09red/bta:519331%09red
African trypanosomiasis	KEGG PATHWAY	bta05143	7	37	0.0701701	0.494984	101112563|443045|443206|101114226|101113636|101117785|101103585	http://www.genome.jp/kegg-bin/show_pathway?bta05143/bta:287026%09red/bta:281249%09red/bta:534578%09red/bta:282118%09red/bta:281631%09red/bta:281839%09red
Bile secretion	KEGG PATHWAY	bta04976	11	70	0.0727857	0.499923	101106534|494437|101121769|101102089|443461|101111038|443183|101117327|101105902|121819507|443535	http://www.genome.jp/kegg-bin/show_pathway?bta04976/bta:407112%09red/bta:535293%09red/bta:510708%09red/bta:282356%09red/bta:100297538%09red/bta:450206%09red/bta:515333%09red/bta:281276%09red/bta:281601%09red/bta:100336913%09red
Neuroactive ligand-receptor interaction	KEGG PATHWAY	bta04080	35	295	0.0843339	0.549834	101104053|101117078|101120810|101115624|121817145|101118819|101112066|443528|101121604|101103544|443264|101106989|101119614|100169940|100913155|101107224|101119532|443346|443361|101123662|101106846|101123170|114118428|101121717|101114332|443274|101107652|101114783|101107319|101110444|101109484|101109816|101111138|100528010|443335	http://www.genome.jp/kegg-bin/show_pathway?bta04080/bta:532829%09red/bta:539429%09red/bta:281198%09red/bta:404136%09red/bta:541160%09red/bta:539113%09red/bta:407157%09red/bta:281136%09red/bta:526363%09red/bta:532277%09red/bta:536367%09red/bta:537660%09red/bta:497205%09red/bta:282133%09red/bta:282134%09red/bta:533760%09red/bta:281231%09red/bta:281604%09red/bta:781872%09red/bta:504813%09red/bta:613…
Circadian entrainment	KEGG PATHWAY	bta04713	14	99	0.0874212	0.549834	101119495|101106989|101104339|443218|101108767|101102089|101108006|106991715|101111289|101117327|101118870|443274|100192421|101103585	http://www.genome.jp/kegg-bin/show_pathway?bta04713/bta:101909126%09red/bta:287026%09red/bta:510708%09red/bta:524212%09red/bta:539899%09red/bta:281601%09red/bta:613600%09red/bta:281791%09red/bta:281792%09red/bta:525416%09red/bta:511812%09red/bta:408013%09red/bta:539686%09red/bta:280795%09red
Starch and sucrose metabolism	KEGG PATHWAY	bta00500	8	48	0.0918095	0.549834	101108802|101107690|442993|101120124|100534646|101114271|100534645|100534643	http://www.genome.jp/kegg-bin/show_pathway?bta00500/bta:788926%09red/bta:615745%09red/bta:286792%09red/bta:515687%09red/bta:751790%09red/bta:281564%09red
Glycerophospholipid metabolism	KEGG PATHWAY	bta00564	13	91	0.0919233	0.549834	101116150|101112654|101111235|101114659|443090|101120283|XLOC_037183|101119394|101108119|101102020|101120972|101120062|101120647	http://www.genome.jp/kegg-bin/show_pathway?bta00564/bta:497202%09red/bta:541284%09red/bta:507456%09red/bta:614911%09red/bta:506802%09red/bta:518523%09red/bta:515361%09red/bta:525042%09red/bta:531209%09red/bta:519739%09red/bta:537224%09red/bta:504948%09red/bta:617707%09red
Nitrogen metabolism	KEGG PATHWAY	bta00910	4	17	0.0922511	0.549834	101117861|101109718|101111288|443309	http://www.genome.jp/kegg-bin/show_pathway?bta00910/bta:510801%09red/bta:614323%09red/bta:280741%09red/bta:280742%09red
beta-Alanine metabolism	KEGG PATHWAY	bta00410	6	32	0.0926923	0.549834	101109831|101118798|101105462|101112867|101106176|101108127	http://www.genome.jp/kegg-bin/show_pathway?bta00410/bta:513967%09red/bta:507477%09red/bta:280969%09red/bta:327692%09red/bta:507093%09red/bta:281748%09red
Insulin secretion	KEGG PATHWAY	bta04911	12	84	0.102458	0.577997	101113586|101108589|101108767|101102089|100620053|101112976|101117327|101118870|443461|101112196|100270685|101103585	http://www.genome.jp/kegg-bin/show_pathway?bta04911/bta:513010%09red/bta:287026%09red/bta:510708%09red/bta:282356%09red/bta:534568%09red/bta:540853%09red/bta:525416%09red/bta:281601%09red/bta:408013%09red/bta:282573%09red/bta:534129%09red/bta:537312%09red
HIF-1 signaling pathway	KEGG PATHWAY	bta04066	14	102	0.102892	0.577997	101113205|101107621|101117129|101107690|101119242|443318|443461|101122484|101118870|101107460|101111426|497271|101110626|443088	http://www.genome.jp/kegg-bin/show_pathway?bta04066/bta:617915%09red/bta:281239%09red/bta:280705%09red/bta:514889%09red/bta:282356%09red/bta:788926%09red/bta:534928%09red/bta:509613%09red/bta:528655%09red/bta:525416%09red/bta:282140%09red/bta:534923%09red/bta:407183%09red/bta:503620%09red
cGMP-PKG signaling pathway	KEGG PATHWAY	bta04022	21	167	0.104084	0.577997	100620053|114117324|101109357|101113586|100169940|101119242|101102089|101123436|101103800|101109816|106991715|101112976|101117327|101108767|443528|101121046|106991367|100147787|101103585|100270685|101104339	http://www.genome.jp/kegg-bin/show_pathway?bta04022/bta:533048%09red/bta:513010%09red/bta:287026%09red/bta:510708%09red/bta:282041%09red/bta:282133%09red/bta:281601%09red/bta:100300012%09red/bta:282134%09red/bta:281791%09red/bta:281604%09red/bta:613800%09red/bta:613600%09red/bta:281972%09red/bta:408013%09red/bta:282478%09red/bta:534923%09red/bta:282573%09red/bta:534129%09red/bta:534568%09red/bta:…
alpha-Linolenic acid metabolism	KEGG PATHWAY	bta00592	5	26	0.111517	0.606374	101120283|101116150|101120062|101108615|101110625	http://www.genome.jp/kegg-bin/show_pathway?bta00592/bta:531209%09red/bta:506802%09red/bta:521822%09red/bta:614911%09red/bta:508324%09red
Dilated cardiomyopathy	KEGG PATHWAY	bta05414	12	86	0.114829	0.611639	101105970|443209|101108767|101102089|443318|101117327|101122427|443528|101105162|101117308|101110347|101119919	http://www.genome.jp/kegg-bin/show_pathway?bta05414/bta:538496%09red/bta:281239%09red/bta:282644%09red/bta:510708%09red/bta:281601%09red/bta:523755%09red/bta:286800%09red/bta:281604%09red/bta:280765%09red/bta:408013%09red/bta:506995%09red/bta:519331%09red
Glutathione metabolism	KEGG PATHWAY	bta00480	8	52	0.124257	0.625394	443054|101107232|101113149|101116273|101108092|114116333|101104397|101107831	http://www.genome.jp/kegg-bin/show_pathway?bta00480/bta:615514%09red/bta:286809%09red/bta:533917%09red/bta:785216%09red/bta:281210%09red/bta:777644%09red/bta:327709%09red
Glutamatergic synapse	KEGG PATHWAY	bta04724	15	115	0.124446	0.625394	101119495|101116150|101106989|101107319|101111653|101110444|101108767|101102089|106991715|101117327|443514|443246|443274|100192421|101103585	http://www.genome.jp/kegg-bin/show_pathway?bta04724/bta:101909126%09red/bta:282353%09red/bta:510708%09red/bta:533760%09red/bta:518849%09red/bta:531209%09red/bta:524212%09red/bta:287026%09red/bta:281791%09red/bta:281792%09red/bta:511812%09red/bta:408013%09red/bta:281601%09red/bta:526363%09red/bta:282354%09red
Staphylococcus aureus infection	KEGG PATHWAY	bta05150	9	61	0.126835	0.625394	101118514|101114941|101115321|101112563|443045|101108962|101112066|101123401|101107430	http://www.genome.jp/kegg-bin/show_pathway?bta05150/bta:790858%09red/bta:503555%09red/bta:507706%09red/bta:280897%09red/bta:515440%09red/bta:282534%09red/bta:280816%09red/bta:281839%09red
Hypertrophic cardiomyopathy (HCM)	KEGG PATHWAY	bta05410	11	79	0.128388	0.625394	101105970|105613829|101108767|443318|101122427|101117308|101105162|100127210|443209|101110347|101119919	http://www.genome.jp/kegg-bin/show_pathway?bta05410/bta:538496%09red/bta:281239%09red/bta:282644%09red/bta:100295485%09red/bta:538954%09red/bta:523755%09red/bta:286800%09red/bta:280765%09red/bta:408013%09red/bta:506995%09red/bta:519331%09red
Fat digestion and absorption	KEGG PATHWAY	bta04975	7	44	0.129392	0.625394	101120062|101115115|101102020|101110266|101117785|101110939|101102230	http://www.genome.jp/kegg-bin/show_pathway?bta04975/bta:280868%09red/bta:614494%09red/bta:281631%09red/bta:614911%09red/bta:281052%09red/bta:617707%09red
Ovarian steroidogenesis	KEGG PATHWAY	bta04913	8	53	0.133199	0.632087	101116150|100913161|101102089|443318|101117327|443122|114108656|443535	http://www.genome.jp/kegg-bin/show_pathway?bta04913/bta:281276%09red/bta:281239%09red/bta:510708%09red/bta:515710%09red/bta:531209%09red/bta:100337056%09red/bta:281601%09red/bta:281507%09red
p53 signaling pathway	KEGG PATHWAY	bta04115	10	71	0.135868	0.633242	114113041|101113683|101103364|101119213|443318|100144763|101115240|101115970|100147799|106990363	http://www.genome.jp/kegg-bin/show_pathway?bta04115/bta:100850794%09red/bta:281239%09red/bta:509485%09red/bta:524530%09red/bta:281671%09red/bta:505463%09red/bta:614739%09red/bta:538226%09red/bta:534323%09red/bta:615414%09red
Rap1 signaling pathway	KEGG PATHWAY	bta04015	25	214	0.142098	0.644517	101108303|497271|106991715|101117327|443245|101105703|101112600|443088|101119495|101106989|101119242|101102089|101122295|101102873|101115792|101103585|443346|101107460|101112196|780504|780460|443318|101111138|101119747|443076	http://www.genome.jp/kegg-bin/show_pathway?bta04015/bta:532829%09red/bta:533929%09red/bta:281136%09red/bta:503620%09red/bta:617915%09red/bta:287026%09red/bta:281791%09red/bta:616742%09red/bta:534923%09red/bta:281239%09red/bta:286799%09red/bta:519037%09red/bta:281601%09red/bta:282140%09red/bta:280832%09red/bta:280855%09red/bta:510708%09red/bta:524212%09red/bta:286877%09red/bta:280894%09red/bta:519…
Drug metabolism - other enzymes	KEGG PATHWAY	bta00983	6	37	0.145125	0.644517	101108802|100534646|442993|100534645|100534643|101116336	http://www.genome.jp/kegg-bin/show_pathway?bta00983/bta:515687%09red/bta:512098%09red/bta:751790%09red/bta:286792%09red
Estrogen signaling pathway	KEGG PATHWAY	bta04915	13	100	0.147279	0.644517	101119495|101118565|443218|101119242|101102089|101113586|106991715|101112976|101117327|101103544|101103585|101110241|443228	http://www.genome.jp/kegg-bin/show_pathway?bta04915/bta:513010%09red/bta:517040%09red/bta:534129%09red/bta:510708%09red/bta:524734%09red/bta:287026%09red/bta:535704%09red/bta:281791%09red/bta:281792%09red/bta:281601%09red/bta:534923%09red/bta:280795%09red/bta:407238%09red
Vascular smooth muscle contraction	KEGG PATHWAY	bta04270	15	119	0.148902	0.644517	101110380|101116150|101120062|101104339|100169940|101108767|101102089|101123436|101103800|100620053|101117327|101121051|100528010|100270685|101103585	http://www.genome.jp/kegg-bin/show_pathway?bta04270/bta:533048%09red/bta:617017%09red/bta:287026%09red/bta:510708%09red/bta:614911%09red/bta:282041%09red/bta:534568%09red/bta:281601%09red/bta:282134%09red/bta:531209%09red/bta:515610%09red/bta:408013%09red/bta:538439%09red/bta:282573%09red/bta:613600%09red
Glycosaminoglycan biosynthesis - chondroitin sulfate / dermatan sulfate	KEGG PATHWAY	bta00532	4	21	0.150634	0.644517	101113667|101103732|101120469|101112877	http://www.genome.jp/kegg-bin/show_pathway?bta00532/bta:528057%09red/bta:528860%09red/bta:506758%09red/bta:535975%09red
Insulin signaling pathway	KEGG PATHWAY	bta04910	17	140	0.161156	0.675091	101115272|100170327|101111043|101111426|101107690|101114816|101106003|101119242|106991367|101122295|100329218|443186|100169699|101107865|100127210|100037690|101110241	http://www.genome.jp/kegg-bin/show_pathway?bta04910/bta:100139988%09red/bta:615866%09red/bta:524734%09red/bta:286877%09red/bta:286879%09red/bta:281152%09red/bta:282855%09red/bta:788926%09red/bta:100300012%09red/bta:539361%09red/bta:509613%09red/bta:282463%09red/bta:281590%09red/bta:538954%09red/bta:534923%09red/bta:515338%09red/bta:533171%09red
Sulfur metabolism	KEGG PATHWAY	bta00920	3	14	0.164224	0.675091	101113498|106990363|101122238	http://www.genome.jp/kegg-bin/show_pathway?bta00920/bta:100850794%09red/bta:536409%09red/bta:507858%09red
Cholinergic synapse	KEGG PATHWAY	bta04725	14	112	0.16554	0.675091	101106197|101119495|101113586|443218|101119242|101102089|101119532|106991715|101112976|101117327|101108767|101118870|100192421|101103585	http://www.genome.jp/kegg-bin/show_pathway?bta04725/bta:513010%09red/bta:287026%09red/bta:510708%09red/bta:540740%09red/bta:511812%09red/bta:281601%09red/bta:539113%09red/bta:281791%09red/bta:281792%09red/bta:525416%09red/bta:408013%09red/bta:534923%09red/bta:280795%09red/bta:534129%09red
Histidine metabolism	KEGG PATHWAY	bta00340	4	23	0.183986	0.724033	101109831|101108127|101102876|101118798	http://www.genome.jp/kegg-bin/show_pathway?bta00340/bta:507477%09red/bta:513967%09red/bta:613413%09red/bta:507093%09red
Cell adhesion molecules (CAMs)	KEGG PATHWAY	bta04514	18	154	0.188489	0.724033	101118514|101121229|100170321|101112563|443045|101112016|101108962|101115513|101116577|101113636|101114226|101113649|101119747|101112759|101106811|101106820|101115864|100303608	http://www.genome.jp/kegg-bin/show_pathway?bta04514/bta:790858%09red/bta:282118%09red/bta:281941%09red/bta:514998%09red/bta:537808%09red/bta:534578%09red/bta:282637%09red/bta:530042%09red/bta:281062%09red/bta:282534%09red/bta:508268%09red/bta:538761%09red/bta:509230%09red/bta:617453%09red/bta:281839%09red/bta:282303%09red/bta:539462%09red
Fructose and mannose metabolism	KEGG PATHWAY	bta00051	5	32	0.192047	0.724033	101115280|101107621|101107690|101110626|443085	http://www.genome.jp/kegg-bin/show_pathway?bta00051/bta:509566%09red/bta:788926%09red/bta:534928%09red/bta:508954%09red/bta:407183%09red
Small cell lung cancer	KEGG PATHWAY	bta05222	11	87	0.192802	0.724033	101122429|101119242|101111845|100144763|101106520|100216328|101106719|101119408|101115805|106990363|101105743	http://www.genome.jp/kegg-bin/show_pathway?bta05222/bta:100850794%09red/bta:511043%09red/bta:520167%09red/bta:509500%09red/bta:508632%09red/bta:524530%09red/bta:520030%09red/bta:507234%09red/bta:534923%09red/bta:518914%09red
GABAergic synapse	KEGG PATHWAY	bta04727	11	87	0.192802	0.724033	101105462|101119495|101108767|101102089|121817145|106991715|101117327|100913155|101117406|101103544|100192421	http://www.genome.jp/kegg-bin/show_pathway?bta04727/bta:517040%09red/bta:510708%09red/bta:511812%09red/bta:338472%09red/bta:281601%09red/bta:280969%09red/bta:281791%09red/bta:281792%09red/bta:613670%09red/bta:408013%09red/bta:540657%09red
Nicotine addiction	KEGG PATHWAY	bta05033	6	41	0.194805	0.724033	101106989|101111653|100913155|121817145|101119532|443274	http://www.genome.jp/kegg-bin/show_pathway?bta05033/bta:101909126%09red/bta:613670%09red/bta:518849%09red/bta:524212%09red/bta:539113%09red/bta:540657%09red
Rheumatoid arthritis	KEGG PATHWAY	bta05323	12	97	0.196959	0.724033	101118514|780517|101108962|101112563|443218|443045|443206|101104057|101120355|497271|101117677|443088	http://www.genome.jp/kegg-bin/show_pathway?bta05323/bta:790858%09red/bta:281249%09red/bta:100848085%09red/bta:518974%09red/bta:511839%09red/bta:282534%09red/bta:504507%09red/bta:282140%09red/bta:280795%09red/bta:281839%09red/bta:503620%09red
Calcium signaling pathway	KEGG PATHWAY	bta04020	21	188	0.216018	0.771053	101117327|101118773|101121067|101106989|114117324|100169940|101108767|101102089|101111344|101118819|101111289|101121717|101118870|443528|101121604|101105703|100147787|101103585|100528010|101115627|101121046	http://www.genome.jp/kegg-bin/show_pathway?bta04020/bta:618262%09red/bta:287026%09red/bta:510708%09red/bta:615813%09red/bta:524212%09red/bta:539899%09red/bta:281231%09red/bta:281601%09red/bta:282134%09red/bta:519037%09red/bta:281970%09red/bta:281604%09red/bta:613800%09red/bta:540771%09red/bta:282146%09red/bta:525416%09red/bta:404136%09red/bta:282478%09red/bta:408013%09red/bta:538439%09red/bta:281…
Leukocyte transendothelial migration	KEGG PATHWAY	bta04670	14	119	0.218733	0.771053	101121229|101114226|101112563|443045|101103800|101115513|106991715|101113636|101115864|101113649|101109906|101106811|101112196|100303608	http://www.genome.jp/kegg-bin/show_pathway?bta04670/bta:514998%09red/bta:282041%09red/bta:534578%09red/bta:282118%09red/bta:538761%09red/bta:281791%09red/bta:508268%09red/bta:614712%09red/bta:509230%09red/bta:617453%09red/bta:281839%09red/bta:282303%09red/bta:537312%09red
Glyoxylate and dicarboxylate metabolism	KEGG PATHWAY	bta00630	4	25	0.219459	0.771053	101112791|443544|101120772|101122731	http://www.genome.jp/kegg-bin/show_pathway?bta00630/bta:512995%09red/bta:509002%09red/bta:317723%09red/bta:280871%09red
Thyroid hormone synthesis	KEGG PATHWAY	bta04918	9	71	0.221567	0.771053	101115381|101116157|101113586|101102089|101112976|101117327|101108200|101104397|101103585	http://www.genome.jp/kegg-bin/show_pathway?bta04918/bta:100337021%09red/bta:287026%09red/bta:510708%09red/bta:513010%09red/bta:531519%09red/bta:281601%09red/bta:281210%09red/bta:509121%09red/bta:534129%09red
Inositol phosphate metabolism	KEGG PATHWAY	bta00562	8	62	0.226752	0.777726	101123108|101112848|101111344|101105968|101115627|101106176|101105703|101103585	http://www.genome.jp/kegg-bin/show_pathway?bta00562/bta:287026%09red/bta:511124%09red/bta:615813%09red/bta:513301%09red/bta:519037%09red/bta:327692%09red/bta:540771%09red/bta:534793%09red
Melanogenesis	KEGG PATHWAY	bta04916	12	101	0.232074	0.777726	101117327|101119495|101113586|101121415|101102089|780504|106991715|101123374|101113129|101118870|101122197|101103585	http://www.genome.jp/kegg-bin/show_pathway?bta04916/bta:513010%09red/bta:287026%09red/bta:510708%09red/bta:508008%09red/bta:522467%09red/bta:281791%09red/bta:281792%09red/bta:525416%09red/bta:281601%09red/bta:539337%09red/bta:280832%09red/bta:445418%09red
Non-alcoholic fatty liver disease (NAFLD)	KEGG PATHWAY	bta04932	18	161	0.236629	0.777726	101121420|101114007|100036762|101119242|101109923|106990363|100329218|101121018|101108778|101118232|101122593|101118899|101115694|106991367|100127210|101117965|101116044|443264	http://www.genome.jp/kegg-bin/show_pathway?bta04932/bta:100850794%09red/bta:327704%09red/bta:497205%09red/bta:327680%09red/bta:281480%09red/bta:538954%09red/bta:286885%09red/bta:100300012%09red/bta:539361%09red/bta:338046%09red/bta:338057%09red/bta:100851363%09red/bta:540225%09red/bta:616109%09red/bta:534923%09red/bta:537380%09red/bta:407234%09red/bta:327670%09red
Alanine, aspartate and glutamate metabolism	KEGG PATHWAY	bta00250	5	35	0.238277	0.777726	114110625|101116643|101105895|101120570|101105462	http://www.genome.jp/kegg-bin/show_pathway?bta00250/bta:100126042%09red/bta:530101%09red/bta:281779%09red/bta:280969%09red/bta:509652%09red
Glycolysis / Gluconeogenesis	KEGG PATHWAY	bta00010	8	63	0.238383	0.777726	101109831|114115283|101107690|443085|101114126|101118798|101108127|100037690	http://www.genome.jp/kegg-bin/show_pathway?bta00010/bta:510551%09red/bta:509566%09red/bta:513967%09red/bta:282855%09red/bta:507477%09red/bta:507093%09red/bta:788926%09red/bta:506459%09red
Arachidonic acid metabolism	KEGG PATHWAY	bta00590	9	73	0.243175	0.783565	101114663|101116150|101120062|101120283|101111361|114117814|101104397|114108656|101116418	http://www.genome.jp/kegg-bin/show_pathway?bta00590/bta:281210%09red/bta:506802%09red/bta:614911%09red/bta:531209%09red/bta:100337056%09red/bta:504769%09red/bta:509326%09red/bta:515946%09red/bta:282021%09red
Morphine addiction	KEGG PATHWAY	bta05032	11	93	0.24891	0.792261	101118773|100913155|101102089|121817145|101109816|101119495|106991715|101117327|101107286|101103544|100192421	http://www.genome.jp/kegg-bin/show_pathway?bta05032/bta:517040%09red/bta:613670%09red/bta:281791%09red/bta:282133%09red/bta:281601%09red/bta:281970%09red/bta:100337124%09red/bta:281792%09red/bta:511812%09red/bta:510708%09red/bta:540657%09red
One carbon pool by folate	KEGG PATHWAY	bta00670	3	18	0.253187	0.79432	100913154|443544|101114182	http://www.genome.jp/kegg-bin/show_pathway?bta00670/bta:505677%09red/bta:509002%09red/bta:516864%09red
Huntington's disease	KEGG PATHWAY	bta05016	21	194	0.255643	0.79432	101114007|101122250|101113586|494434|101122456|101117275|101109923|100036762|101121420|101112976|101108778|101118232|101122593|101118899|101122460|101115694|100147787|101117965|101113084|106990363|101103585	http://www.genome.jp/kegg-bin/show_pathway?bta05016/bta:100850794%09red/bta:513010%09red/bta:287026%09red/bta:789854%09red/bta:534479%09red/bta:327680%09red/bta:338057%09red/bta:286885%09red/bta:338046%09red/bta:524709%09red/bta:327704%09red/bta:616109%09red/bta:536553%09red/bta:540225%09red/bta:282478%09red/bta:617701%09red/bta:281561%09red/bta:534129%09red/bta:281480%09red/bta:327670%09red/bta:…
ErbB signaling pathway	KEGG PATHWAY	bta04012	10	85	0.267557	0.821557	101111043|101111426|101119242|105603144|101103979|101118870|443427|101121348|101110241|101110391	http://www.genome.jp/kegg-bin/show_pathway?bta04012/bta:100848238%09red/bta:615866%09red/bta:524734%09red/bta:783452%09red/bta:280737%09red/bta:538751%09red/bta:509613%09red/bta:525416%09red/bta:534526%09red/bta:534923%09red
Pantothenate and CoA biosynthesis	KEGG PATHWAY	bta00770	3	19	0.27648	0.839084	101105005|443450|101103923	http://www.genome.jp/kegg-bin/show_pathway?bta00770/bta:526704%09red/bta:281643%09red/bta:510749%09red
Synthesis and degradation of ketone bodies	KEGG PATHWAY	bta00072	2	11	0.296306	0.888917	101104112|101102177	http://www.genome.jp/kegg-bin/show_pathway?bta00072/bta:535804%09red/bta:534090%09red
Toxoplasmosis	KEGG PATHWAY	bta05145	13	119	0.306955	0.901515	101118514|101119495|101122429|101119242|101108962|106991715|101106520|101122484|101106719|100216328|443535|106990363|101105743	http://www.genome.jp/kegg-bin/show_pathway?bta05145/bta:100850794%09red/bta:281276%09red/bta:790858%09red/bta:511043%09red/bta:514889%09red/bta:281791%09red/bta:520167%09red/bta:520030%09red/bta:282534%09red/bta:281792%09red/bta:534923%09red/bta:518914%09red
Gap junction	KEGG PATHWAY	bta04540	10	89	0.311078	0.901515	101117327|101104339|101102089|106991715|100303606|443528|443346|101118605|101112600|101103585	http://www.genome.jp/kegg-bin/show_pathway?bta04540/bta:287026%09red/bta:510708%09red/bta:615087%09red/bta:281791%09red/bta:281604%09red/bta:768036%09red/bta:281601%09red/bta:281136%09red/bta:613787%09red/bta:613600%09red
Phototransduction	KEGG PATHWAY	bta04744	4	30	0.314117	0.901515	101106563|101117520|101122024|101123241	http://www.genome.jp/kegg-bin/show_pathway?bta04744/bta:281802%09red/bta:281973%09red/bta:509933%09red/bta:281977%09red
Dopaminergic synapse	KEGG PATHWAY	bta04728	14	130	0.314321	0.901515	101119495|101106989|101113586|443218|101119242|101117264|106991715|101112976|101108767|101118870|101123531|443274|100192421|101103585	http://www.genome.jp/kegg-bin/show_pathway?bta04728/bta:101909126%09red/bta:287026%09red/bta:533788%09red/bta:529590%09red/bta:524212%09red/bta:511812%09red/bta:513010%09red/bta:281791%09red/bta:281792%09red/bta:525416%09red/bta:408013%09red/bta:534923%09red/bta:280795%09red/bta:534129%09red
Peroxisome	KEGG PATHWAY	bta04146	9	80	0.323584	0.911025	101111626|101117285|101115907|101107212|101111781|101108576|101110905|101119009|101110625	http://www.genome.jp/kegg-bin/show_pathway?bta04146/bta:281400%09red/bta:508609%09red/bta:512676%09red/bta:536628%09red/bta:537161%09red/bta:535727%09red/bta:508918%09red/bta:281092%09red/bta:508324%09red
Long-term depression	KEGG PATHWAY	bta04730	7	60	0.324618	0.911025	101119495|101117078|101104339|443318|106991715|101116150|101103585	http://www.genome.jp/kegg-bin/show_pathway?bta04730/bta:536367%09red/bta:281239%09red/bta:531209%09red/bta:287026%09red/bta:281791%09red/bta:281792%09red/bta:613600%09red
Vitamin digestion and absorption	KEGG PATHWAY	bta04977	3	22	0.347125	0.943745	101117785|101110433|101113196	http://www.genome.jp/kegg-bin/show_pathway?bta04977/bta:537669%09red/bta:281631%09red/bta:523202%09red
Proximal tubule bicarbonate reclamation	KEGG PATHWAY	bta04964	3	22	0.347125	0.943745	100037690|494437|101109718	http://www.genome.jp/kegg-bin/show_pathway?bta04964/bta:407112%09red/bta:280741%09red/bta:282855%09red
Biosynthesis of unsaturated fatty acids	KEGG PATHWAY	bta01040	3	22	0.347125	0.943745	443185|101108615|101110625	http://www.genome.jp/kegg-bin/show_pathway?bta01040/bta:521822%09red/bta:280924%09red/bta:508324%09red
Carbon metabolism	KEGG PATHWAY	bta01200	11	104	0.363351	0.9677	443085|101107690|101112791|443544|101122731|101106176|101112867|101114126|100036762|100171395|101111328	http://www.genome.jp/kegg-bin/show_pathway?bta01200/bta:509566%09red/bta:512995%09red/bta:509002%09red/bta:788926%09red/bta:505103%09red/bta:327692%09red/bta:280871%09red/bta:281748%09red/bta:281480%09red/bta:280910%09red/bta:506459%09red
Retrograde endocannabinoid signaling	KEGG PATHWAY	bta04723	11	104	0.363351	0.9677	101119495|101111653|101108767|101102089|121817145|106991715|101117327|100913155|443274|100192421|101103585	http://www.genome.jp/kegg-bin/show_pathway?bta04723/bta:101909126%09red/bta:287026%09red/bta:510708%09red/bta:518849%09red/bta:511812%09red/bta:281601%09red/bta:281791%09red/bta:281792%09red/bta:613670%09red/bta:408013%09red/bta:540657%09red
Fatty acid elongation	KEGG PATHWAY	bta00062	3	23	0.370617	0.977082	101112867|101121049|101122862	http://www.genome.jp/kegg-bin/show_pathway?bta00062/bta:532785%09red/bta:281748%09red/bta:281421%09red
Pancreatic secretion	KEGG PATHWAY	bta04972	10	95	0.378913	0.986735	114117324|101120062|101112329|101102089|101115078|101117327|101121046|101116575|100270685|101103585	http://www.genome.jp/kegg-bin/show_pathway?bta04972/bta:287026%09red/bta:510708%09red/bta:534256%09red/bta:614911%09red/bta:613800%09red/bta:508222%09red/bta:281601%09red/bta:282573%09red/bta:282146%09red/bta:616757%09red
Ras signaling pathway	KEGG PATHWAY	bta04014	23	234	0.393153	0.986735	101108303|101116150|101115743|497271|443245|101105703|101112600|101110391|443088|101106989|101119242|101120283|101102873|101115792|100192421|101110241|101107460|101120062|101121934|780504|780460|443318|443076	http://www.genome.jp/kegg-bin/show_pathway?bta04014/bta:519037%09red/bta:511812%09red/bta:534526%09red/bta:503620%09red/bta:617915%09red/bta:524734%09red/bta:614911%09red/bta:616742%09red/bta:506802%09red/bta:529346%09red/bta:531209%09red/bta:534923%09red/bta:524957%09red/bta:281239%09red/bta:286799%09red/bta:533929%09red/bta:282140%09red/bta:280832%09red/bta:280855%09red/bta:524212%09red/bta:280…
Glycosaminoglycan biosynthesis - heparan sulfate / heparin	KEGG PATHWAY	bta00534	3	24	0.393946	0.986735	101113394|101104909|101112819	http://www.genome.jp/kegg-bin/show_pathway?bta00534/bta:538691%09red/bta:529260%09red/bta:511060%09red
Vasopressin-regulated water reabsorption	KEGG PATHWAY	bta04962	5	45	0.405634	0.986735	101102427|101112976|443047|101113586|443024	http://www.genome.jp/kegg-bin/show_pathway?bta04962/bta:780866%09red/bta:513010%09red/bta:534129%09red/bta:537748%09red/bta:539870%09red
Tryptophan metabolism	KEGG PATHWAY	bta00380	5	45	0.405634	0.986735	101112867|101108127|101118798|101104808|101122862	http://www.genome.jp/kegg-bin/show_pathway?bta00380/bta:507477%09red/bta:513967%09red/bta:281748%09red/bta:518393%09red/bta:532785%09red
Phagosome	KEGG PATHWAY	bta04145	16	161	0.406125	0.986735	100303606|105605755|105609515|101104057|101118514|101108962|101115115|101115211|101102427|101116784|101123401|443033|101118605|101107430|101117677|101102230	http://www.genome.jp/kegg-bin/show_pathway?bta04145/bta:790858%09red/bta:281036%09red/bta:503555%09red/bta:507706%09red/bta:541281%09red/bta:281052%09red/bta:518974%09red/bta:511839%09red/bta:282534%09red/bta:615087%09red/bta:537748%09red/bta:768036%09red/bta:407213%09red/bta:504323%09red/bta:415114%09red
Cyanoamino acid metabolism	KEGG PATHWAY	bta00460	1	5	0.406969	0.986735	443544	http://www.genome.jp/kegg-bin/show_pathway?bta00460/bta:509002%09red
Butirosin and neomycin biosynthesis	KEGG PATHWAY	bta00524	1	5	0.406969	0.986735	101107690	http://www.genome.jp/kegg-bin/show_pathway?bta00524/bta:788926%09red
Colorectal cancer	KEGG PATHWAY	bta05210	7	66	0.408304	0.986735	443218|101118654|101119242|101104664|100144763|554326|106990363	http://www.genome.jp/kegg-bin/show_pathway?bta05210/bta:100850794%09red/bta:533233%09red/bta:524530%09red/bta:282382%09red/bta:537176%09red/bta:534923%09red/bta:280795%09red
Basal cell carcinoma	KEGG PATHWAY	bta05217	6	56	0.41514	0.992106	101121415|101111396|101104664|101123374|101113129|101122197	http://www.genome.jp/kegg-bin/show_pathway?bta05217/bta:533233%09red/bta:540830%09red/bta:522467%09red/bta:508008%09red/bta:539337%09red/bta:445418%09red
Glycosaminoglycan biosynthesis - keratan sulfate	KEGG PATHWAY	bta00533	2	15	0.420495	0.992106	100620048|101112159	http://www.genome.jp/kegg-bin/show_pathway?bta00533/bta:506932%09red/bta:281781%09red
TNF signaling pathway	KEGG PATHWAY	bta04668	11	110	0.428712	0.992106	101112563|443218|443045|101119242|101114226|101112976|101121018|443116|101119408|101113636|101113586	http://www.genome.jp/kegg-bin/show_pathway?bta04668/bta:513010%09red/bta:537380%09red/bta:281915%09red/bta:534578%09red/bta:282118%09red/bta:507234%09red/bta:534923%09red/bta:280795%09red/bta:534129%09red/bta:281839%09red
Viral myocarditis	KEGG PATHWAY	bta05416	7	68	0.43625	0.992106	101118514|101112563|443045|101108962|100144763|101116618|106990363	http://www.genome.jp/kegg-bin/show_pathway?bta05416/bta:100850794%09red/bta:790858%09red/bta:524530%09red/bta:282534%09red/bta:281733%09red/bta:281839%09red
Oxidative phosphorylation	KEGG PATHWAY	bta00190	14	143	0.43753	0.992106	101114007|105610140|101104057|101108778|101109923|100036762|101121420|101118232|101122593|101118899|101115694|101117965|101117677|101123491	http://www.genome.jp/kegg-bin/show_pathway?bta00190/bta:518974%09red/bta:327680%09red/bta:100852084%09red/bta:338057%09red/bta:286885%09red/bta:511839%09red/bta:338046%09red/bta:327704%09red/bta:100851363%09red/bta:540225%09red/bta:616109%09red/bta:506492%09red/bta:281480%09red/bta:327670%09red
Pentose phosphate pathway	KEGG PATHWAY	bta00030	3	26	0.439839	0.992106	443085|101120994|100171395	http://www.genome.jp/kegg-bin/show_pathway?bta00030/bta:509566%09red/bta:280910%09red/bta:513276%09red
Cardiac muscle contraction	KEGG PATHWAY	bta04260	8	79	0.440887	0.992106	101105970|101108767|101121420|101108778|101122427|101115694|101117965|101110347	http://www.genome.jp/kegg-bin/show_pathway?bta04260/bta:286885%09red/bta:538496%09red/bta:286800%09red/bta:100851363%09red/bta:540225%09red/bta:616109%09red/bta:408013%09red/bta:519331%09red
Purine metabolism	KEGG PATHWAY	bta00230	17	176	0.443804	0.992106	114110625|101117520|101109357|101103031|101108212|101102089|101121984|101116176|101118773|101111182|101117327|101102023|101122024|101107286|101122238|101123436|101104339	http://www.genome.jp/kegg-bin/show_pathway?bta00230/bta:533048%09red/bta:512748%09red/bta:510708%09red/bta:509652%09red/bta:517063%09red/bta:281601%09red/bta:613600%09red/bta:281970%09red/bta:100337124%09red/bta:281972%09red/bta:281973%09red/bta:281977%09red/bta:767843%09red/bta:536409%09red/bta:613448%09red/bta:785457%09red/bta:282244%09red
Amphetamine addiction	KEGG PATHWAY	bta05031	7	69	0.450154	0.992106	101106989|101113586|443218|101108767|101112976|101118870|443274	http://www.genome.jp/kegg-bin/show_pathway?bta05031/bta:101909126%09red/bta:524212%09red/bta:513010%09red/bta:525416%09red/bta:408013%09red/bta:280795%09red/bta:534129%09red
Amino sugar and nucleotide sugar metabolism	KEGG PATHWAY	bta00520	5	48	0.456141	0.992106	101115615|101114271|101120570|101107690|101116643	http://www.genome.jp/kegg-bin/show_pathway?bta00520/bta:788926%09red/bta:281779%09red/bta:530101%09red/bta:100336710%09red/bta:281564%09red
Sphingolipid metabolism	KEGG PATHWAY	bta00600	5	48	0.456141	0.992106	101113069|101102020|101112511|101112599|101116130	http://www.genome.jp/kegg-bin/show_pathway?bta00600/bta:615110%09red/bta:513295%09red/bta:617707%09red/bta:281566%09red/bta:100337041%09red
Mineral absorption	KEGG PATHWAY	bta04978	5	48	0.456141	0.992106	101113825|100137068|101117129|494437|101106919	http://www.genome.jp/kegg-bin/show_pathway?bta04978/bta:407112%09red/bta:100851799%09red/bta:534257%09red/bta:280705%09red/bta:614878%09red
Phosphatidylinositol signaling system	KEGG PATHWAY	bta04070	8	81	0.466663	1	101123108|101112848|101111344|101105968|101115627|101114659|101105703|101103585	http://www.genome.jp/kegg-bin/show_pathway?bta04070/bta:287026%09red/bta:511124%09red/bta:615813%09red/bta:513301%09red/bta:518523%09red/bta:519037%09red/bta:540771%09red/bta:534793%09red
Chagas disease (American trypanosomiasis)	KEGG PATHWAY	bta05142	11	114	0.472232	1	101119495|105613829|443218|101119242|105609515|106991715|554326|101117327|101122484|101121067|101103585	http://www.genome.jp/kegg-bin/show_pathway?bta05142/bta:287026%09red/bta:514889%09red/bta:100295485%09red/bta:281036%09red/bta:281791%09red/bta:281792%09red/bta:282382%09red/bta:281601%09red/bta:534923%09red/bta:280795%09red/bta:281789%09red
Melanoma	KEGG PATHWAY	bta05218	7	71	0.477747	1	101119242|780460|443318|100144763|101119747|101112600|443076	http://www.genome.jp/kegg-bin/show_pathway?bta05218/bta:280855%09red/bta:281239%09red/bta:524530%09red/bta:533929%09red/bta:534923%09red/bta:613787%09red/bta:282637%09red
Alzheimer's disease	KEGG PATHWAY	bta05010	17	180	0.478412	1	101114007|100036762|101106989|101122593|101108767|101109923|101121420|101111289|101108778|101118232|443408|101118899|101115694|101112253|101117965|106990363|101103585	http://www.genome.jp/kegg-bin/show_pathway?bta05010/bta:100850794%09red/bta:327680%09red/bta:287026%09red/bta:281004%09red/bta:524212%09red/bta:539899%09red/bta:338057%09red/bta:286885%09red/bta:338046%09red/bta:327704%09red/bta:616109%09red/bta:540225%09red/bta:280843%09red/bta:408013%09red/bta:281480%09red/bta:327670%09red/bta:100851363%09red
Platelet activation	KEGG PATHWAY	bta04611	12	126	0.483903	1	101116150|101123066|101103800|101119242|101102089|101122295|101111361|106991715|101117327|101102336|101103585|101104339	http://www.genome.jp/kegg-bin/show_pathway?bta04611/bta:287026%09red/bta:510708%09red/bta:281791%09red/bta:282041%09red/bta:286877%09red/bta:531209%09red/bta:510522%09red/bta:100336616%09red/bta:281601%09red/bta:534923%09red/bta:509326%09red/bta:613600%09red
mTOR signaling pathway	KEGG PATHWAY	bta04150	6	61	0.490435	1	101111426|101114584|101119242|443318|101108239|100127210	http://www.genome.jp/kegg-bin/show_pathway?bta04150/bta:281239%09red/bta:529235%09red/bta:509613%09red/bta:618601%09red/bta:538954%09red/bta:534923%09red
Salmonella infection	KEGG PATHWAY	bta05132	8	83	0.492175	1	101104655|443218|101103800|443206|101109632|101102427|101122484|101104595	http://www.genome.jp/kegg-bin/show_pathway?bta05132/bta:515552%09red/bta:514889%09red/bta:281249%09red/bta:282041%09red/bta:537748%09red/bta:512242%09red/bta:528415%09red/bta:280795%09red
Amoebiasis	KEGG PATHWAY	bta05146	11	117	0.504483	1	101122429|101120129|101105026|101106520|101117327|101106719|100216328|101121067|101103585|101115805|101105743	http://www.genome.jp/kegg-bin/show_pathway?bta05146/bta:787106%09red/bta:511043%09red/bta:520167%09red/bta:508632%09red/bta:520030%09red/bta:526766%09red/bta:287026%09red/bta:281601%09red/bta:518914%09red/bta:281789%09red
Hedgehog signaling pathway	KEGG PATHWAY	bta04340	5	51	0.505371	1	101113129|101108200|101121415|101111396|101123374	http://www.genome.jp/kegg-bin/show_pathway?bta04340/bta:100337021%09red/bta:508008%09red/bta:539337%09red/bta:540830%09red/bta:522467%09red
Cocaine addiction	KEGG PATHWAY	bta05030	5	51	0.505371	1	101117275|101106989|101113586|106991715|101112976	http://www.genome.jp/kegg-bin/show_pathway?bta05030/bta:281791%09red/bta:534129%09red/bta:524212%09red/bta:513010%09red/bta:617701%09red
Hippo signaling pathway	KEGG PATHWAY	bta04390	14	151	0.513698	1	101121415|443175|101107231|554326|101122295|100144763|101123374|101113129|443427|100147799|101119747|101122197|101104664|443229	http://www.genome.jp/kegg-bin/show_pathway?bta04390/bta:507682%09red/bta:533233%09red/bta:286877%09red/bta:282637%09red/bta:524530%09red/bta:508008%09red/bta:522467%09red/bta:540488%09red/bta:282382%09red/bta:538751%09red/bta:540595%09red/bta:539337%09red/bta:445418%09red/bta:615414%09red
Pathways in cancer	KEGG PATHWAY	bta05200	30	329	0.523209	1	101111396|101104664|101123374|101113129|443245|101106719|101122197|101119242|443461|554326|101102873|101121415|101111043|101111845|100144763|101119408|100216328|101120355|780504|101122429|443218|101118654|780460|443318|101106520|101119747|443076|101115805|106990363|101105743	http://www.genome.jp/kegg-bin/show_pathway?bta05200/bta:100850794%09red/bta:520167%09red/bta:524530%09red/bta:520030%09red/bta:533929%09red/bta:518914%09red/bta:280795%09red/bta:445418%09red/bta:540830%09red/bta:522467%09red/bta:100848085%09red/bta:282382%09red/bta:534923%09red/bta:281239%09red/bta:511043%09red/bta:286799%09red/bta:615866%09red/bta:508632%09red/bta:509500%09red/bta:508008%09red/b…
Thyroid cancer	KEGG PATHWAY	bta05216	3	30	0.527044	1	101119747|100144763|101111845	http://www.genome.jp/kegg-bin/show_pathway?bta05216/bta:509500%09red/bta:524530%09red/bta:282637%09red
Other types of O-glycan biosynthesis	KEGG PATHWAY	bta00514	3	30	0.527044	1	100620048|101108300|100913159	http://www.genome.jp/kegg-bin/show_pathway?bta00514/bta:493992%09red/bta:281781%09red/bta:282073%09red
Citrate cycle (TCA cycle)	KEGG PATHWAY	bta00020	3	30	0.527044	1	101112791|100036762|100037690	http://www.genome.jp/kegg-bin/show_pathway?bta00020/bta:512995%09red/bta:281480%09red/bta:282855%09red
2-Oxocarboxylic acid metabolism	KEGG PATHWAY	bta01210	2	19	0.532535	1	101112791|443450	http://www.genome.jp/kegg-bin/show_pathway?bta01210/bta:281643%09red/bta:512995%09red
Vitamin B6 metabolism	KEGG PATHWAY	bta00750	1	8	0.543337	1	101104808	http://www.genome.jp/kegg-bin/show_pathway?bta00750/bta:518393%09red
Synaptic vesicle cycle	KEGG PATHWAY	bta04721	6	65	0.548273	1	101108589|101104057|101123470|101122460|101111653|101117677	http://www.genome.jp/kegg-bin/show_pathway?bta04721/bta:518849%09red/bta:518974%09red/bta:511839%09red/bta:540853%09red/bta:536553%09red/bta:100337128%09red
Thyroid hormone signaling pathway	KEGG PATHWAY	bta04919	10	112	0.570274	1	101111344|101119242|443461|100144763|101111845|101123354|101123311|101105703|101103585|443228	http://www.genome.jp/kegg-bin/show_pathway?bta04919/bta:287026%09red/bta:282356%09red/bta:509500%09red/bta:529109%09red/bta:524530%09red/bta:519037%09red/bta:540771%09red/bta:534923%09red/bta:407238%09red/bta:534649%09red
Ether lipid metabolism	KEGG PATHWAY	bta00565	4	44	0.575813	1	101120283|101102020|101116150|101120062	http://www.genome.jp/kegg-bin/show_pathway?bta00565/bta:531209%09red/bta:506802%09red/bta:614911%09red/bta:617707%09red
Steroid biosynthesis	KEGG PATHWAY	bta00100	2	21	0.582728	1	101123162|100125351	http://www.genome.jp/kegg-bin/show_pathway?bta00100/bta:526535%09red/bta:533726%09red
Prion diseases	KEGG PATHWAY	bta05020	3	33	0.587228	1	101102931|101112759|101105026	http://www.genome.jp/kegg-bin/show_pathway?bta05020/bta:507339%09red/bta:281941%09red/bta:526766%09red
Signaling pathways regulating pluripotency of stem cells	KEGG PATHWAY	bta04550	12	139	0.61221	1	101112041|101121415|101119242|101104664|443318|101123374|101113129|101119286|101111867|101122197|101117895|443229	http://www.genome.jp/kegg-bin/show_pathway?bta04550/bta:281239%09red/bta:533233%09red/bta:530430%09red/bta:508008%09red/bta:522467%09red/bta:613877%09red/bta:540488%09red/bta:536380%09red/bta:534923%09red/bta:539337%09red/bta:445418%09red/bta:527910%09red
Inflammatory mediator regulation of TRP channels	KEGG PATHWAY	bta04750	9	105	0.617533	1	101117327|101116150|101102089|443318|101121717|101118870|101113830|101120562|101103585	http://www.genome.jp/kegg-bin/show_pathway?bta04750/bta:281239%09red/bta:538244%09red/bta:510708%09red/bta:100848162%09red/bta:281231%09red/bta:287026%09red/bta:531209%09red/bta:525416%09red/bta:281601%09red
Linoleic acid metabolism	KEGG PATHWAY	bta00591	3	35	0.624509	1	101120283|101116150|101120062	http://www.genome.jp/kegg-bin/show_pathway?bta00591/bta:531209%09red/bta:506802%09red/bta:614911%09red
Dorso-ventral axis formation	KEGG PATHWAY	bta04320	2	23	0.628826	1	101119464|101114056	http://www.genome.jp/kegg-bin/show_pathway?bta04320/bta:537833%09red/bta:504512%09red
Glycosaminoglycan degradation	KEGG PATHWAY	bta00531	2	23	0.628826	1	101108802|101108314	http://www.genome.jp/kegg-bin/show_pathway?bta00531/bta:515687%09red/bta:538401%09red
Parkinson's disease	KEGG PATHWAY	bta05012	13	154	0.643291	1	101114007|100036762|101108778|101109923|101121420|106991715|101118232|101122593|101118899|101115694|100147787|101117965|106990363	http://www.genome.jp/kegg-bin/show_pathway?bta05012/bta:100850794%09red/bta:327680%09red/bta:338057%09red/bta:286885%09red/bta:338046%09red/bta:281791%09red/bta:327704%09red/bta:616109%09red/bta:540225%09red/bta:282478%09red/bta:281480%09red/bta:327670%09red/bta:100851363%09red
Arginine and proline metabolism	KEGG PATHWAY	bta00330	5	61	0.653609	1	100190977|101108127|101118798|101105895|100174904	http://www.genome.jp/kegg-bin/show_pathway?bta00330/bta:414732%09red/bta:507477%09red/bta:513967%09red/bta:100851864%09red/bta:100126042%09red
Chronic myeloid leukemia	KEGG PATHWAY	bta05220	6	73	0.653847	1	101111043|101119242|100144763|554326|101115743|101110241	http://www.genome.jp/kegg-bin/show_pathway?bta05220/bta:615866%09red/bta:524734%09red/bta:524530%09red/bta:529346%09red/bta:282382%09red/bta:534923%09red
Gastric acid secretion	KEGG PATHWAY	bta04971	6	74	0.665919	1	101102089|106991715|101117327|101118870|101111729|101103585	http://www.genome.jp/kegg-bin/show_pathway?bta04971/bta:287026%09red/bta:510708%09red/bta:281601%09red/bta:281791%09red/bta:525416%09red/bta:282590%09red
Fc gamma R-mediated phagocytosis	KEGG PATHWAY	bta04666	7	86	0.666203	1	101119242|101102178|101115743|101102020|100579169|101120897|101102555	http://www.genome.jp/kegg-bin/show_pathway?bta04666/bta:281935%09red/bta:535077%09red/bta:523797%09red/bta:618009%09red/bta:529346%09red/bta:534923%09red/bta:617707%09red
FoxO signaling pathway	KEGG PATHWAY	bta04068	11	134	0.672388	1	101119242|106991367|443318|100144763|101115240|554326|101117406|101107121|100147799|100127210|100037690	http://www.genome.jp/kegg-bin/show_pathway?bta04068/bta:281239%09red/bta:517909%09red/bta:282382%09red/bta:338472%09red/bta:282855%09red/bta:524530%09red/bta:100300012%09red/bta:505463%09red/bta:538954%09red/bta:534923%09red/bta:615414%09red
Regulation of autophagy	KEGG PATHWAY	bta04140	3	38	0.675958	1	101117406|100127210|101108239	http://www.genome.jp/kegg-bin/show_pathway?bta04140/bta:338472%09red/bta:618601%09red/bta:538954%09red
Bladder cancer	KEGG PATHWAY	bta05219	3	38	0.675958	1	101119747|100144763|101120355	http://www.genome.jp/kegg-bin/show_pathway?bta05219/bta:100848085%09red/bta:524530%09red/bta:282637%09red
Tyrosine metabolism	KEGG PATHWAY	bta00350	3	38	0.675958	1	101109831|114115283|101104808	http://www.genome.jp/kegg-bin/show_pathway?bta00350/bta:510551%09red/bta:507093%09red/bta:518393%09red
GnRH signaling pathway	KEGG PATHWAY	bta04912	7	87	0.677182	1	101116150|101108767|101102089|101117327|101118870|443116|101103585	http://www.genome.jp/kegg-bin/show_pathway?bta04912/bta:287026%09red/bta:510708%09red/bta:281915%09red/bta:531209%09red/bta:525416%09red/bta:281601%09red/bta:408013%09red
Riboflavin metabolism	KEGG PATHWAY	bta00740	1	12	0.677695	1	101114832	http://www.genome.jp/kegg-bin/show_pathway?bta00740/bta:515738%09red
Prolactin signaling pathway	KEGG PATHWAY	bta04917	6	75	0.677722	1	443218|101119242|100144763|100147799|101110241|443228	http://www.genome.jp/kegg-bin/show_pathway?bta04917/bta:524734%09red/bta:524530%09red/bta:534923%09red/bta:280795%09red/bta:407238%09red/bta:615414%09red
Biosynthesis of amino acids	KEGG PATHWAY	bta01230	6	75	0.677722	1	101112791|443544|443450|443085|101111328|101108127	http://www.genome.jp/kegg-bin/show_pathway?bta01230/bta:509566%09red/bta:512995%09red/bta:509002%09red/bta:507477%09red/bta:505103%09red/bta:281643%09red
Endometrial cancer	KEGG PATHWAY	bta05213	4	51	0.683698	1	101119242|101119747|101104664|100144763	http://www.genome.jp/kegg-bin/show_pathway?bta05213/bta:534923%09red/bta:524530%09red/bta:282637%09red/bta:533233%09red
Glioma	KEGG PATHWAY	bta05214	5	64	0.692087	1	101119242|101118870|443318|101110241|100144763	http://www.genome.jp/kegg-bin/show_pathway?bta05214/bta:534923%09red/bta:281239%09red/bta:524530%09red/bta:525416%09red/bta:524734%09red
Pertussis	KEGG PATHWAY	bta05133	6	77	0.700506	1	101115321|443218|106991715|101114204|443033|101107430	http://www.genome.jp/kegg-bin/show_pathway?bta05133/bta:507706%09red/bta:515440%09red/bta:281791%09red/bta:280795%09red/bta:281652%09red/bta:407213%09red
Transcriptional misregulation in cancer	KEGG PATHWAY	bta05202	14	173	0.701984	1	101115418|101112958|443318|101111845|101112041|101119464|114109686|101122759|100147799|101117893|443076|101103543|443229|443088	http://www.genome.jp/kegg-bin/show_pathway?bta05202/bta:280855%09red/bta:281239%09red/bta:280952%09red/bta:528877%09red/bta:541166%09red/bta:509500%09red/bta:540947%09red/bta:613877%09red/bta:540488%09red/bta:615414%09red/bta:512259%09red/bta:525511%09red/bta:504512%09red/bta:503620%09red
NF-kappa B signaling pathway	KEGG PATHWAY	bta04064	7	90	0.708729	1	780517|101112563|443045|101114226|101113636|101119408|101104595	http://www.genome.jp/kegg-bin/show_pathway?bta04064/bta:534578%09red/bta:282118%09red/bta:504507%09red/bta:512242%09red/bta:507234%09red/bta:281839%09red
HTLV-I infection	KEGG PATHWAY	bta05166	22	270	0.721779	1	101104664|101116176|101114226|101123374|101117327|101122197|101118514|101112563|443045|101119242|101102089|443461|554326|100147787|101121415|105609515|100144763|101113129|101113636|443218|101108962|100147799	http://www.genome.jp/kegg-bin/show_pathway?bta05166/bta:790858%09red/bta:281036%09red/bta:510708%09red/bta:282356%09red/bta:534578%09red/bta:282118%09red/bta:524530%09red/bta:522467%09red/bta:282534%09red/bta:508008%09red/bta:282382%09red/bta:533233%09red/bta:281601%09red/bta:282478%09red/bta:534923%09red/bta:280795%09red/bta:539337%09red/bta:281839%09red/bta:445418%09red/bta:615414%09red/bta:785…
TGF-beta signaling pathway	KEGG PATHWAY	bta04350	6	79	0.72218	1	101107231|443175|101119286|554326|443323|443229	http://www.genome.jp/kegg-bin/show_pathway?bta04350/bta:507682%09red/bta:530430%09red/bta:327681%09red/bta:540488%09red/bta:282382%09red/bta:540595%09red
Lysine degradation	KEGG PATHWAY	bta00310	4	54	0.723554	1	101112867|101108127|101118798|101122862	http://www.genome.jp/kegg-bin/show_pathway?bta00310/bta:507477%09red/bta:513967%09red/bta:281748%09red/bta:532785%09red
Glycosphingolipid biosynthesis - lacto and neolacto series	KEGG PATHWAY	bta00601	2	28	0.726556	1	100620048|101122666	http://www.genome.jp/kegg-bin/show_pathway?bta00601/bta:539027%09red/bta:281781%09red
Proteoglycans in cancer	KEGG PATHWAY	bta05205	16	201	0.732301	1	101121415|101119285|101104655|101103800|101119242|443318|100144763|101123374|101113129|101118870|443228|101105703|101111043|101122197|443076|443325	http://www.genome.jp/kegg-bin/show_pathway?bta05205/bta:280855%09red/bta:281239%09red/bta:539337%09red/bta:525416%09red/bta:282041%09red/bta:615866%09red/bta:524530%09red/bta:281240%09red/bta:522467%09red/bta:508008%09red/bta:519037%09red/bta:528415%09red/bta:534923%09red/bta:407238%09red/bta:445418%09red/bta:615239%09red
Serotonergic synapse	KEGG PATHWAY	bta04726	9	117	0.73296	1	101106121|101116150|101108767|101119495|106991715|100913155|101114783|100192421|101103585	http://www.genome.jp/kegg-bin/show_pathway?bta04726/bta:287026%09red/bta:511812%09red/bta:531209%09red/bta:100847677%09red/bta:281791%09red/bta:281792%09red/bta:408013%09red/bta:540657%09red/bta:616356%09red
Non-small cell lung cancer	KEGG PATHWAY	bta05223	4	55	0.735977	1	101119242|101114094|100144763|101111845	http://www.genome.jp/kegg-bin/show_pathway?bta05223/bta:534923%09red/bta:509500%09red/bta:524530%09red/bta:536642%09red
Carbohydrate digestion and absorption	KEGG PATHWAY	bta04973	3	42	0.736164	1	101119242|101108767|101107690	http://www.genome.jp/kegg-bin/show_pathway?bta04973/bta:534923%09red/bta:788926%09red/bta:408013%09red
Collecting duct acid secretion	KEGG PATHWAY	bta04966	2	29	0.743262	1	101104057|101117677	http://www.genome.jp/kegg-bin/show_pathway?bta04966/bta:511839%09red/bta:518974%09red
Legionellosis	KEGG PATHWAY	bta05134	4	56	0.747974	1	101109898|443206|101102857|106990363	http://www.genome.jp/kegg-bin/show_pathway?bta05134/bta:100850794%09red/bta:515233%09red/bta:282220%09red/bta:281249%09red
Acute myeloid leukemia	KEGG PATHWAY	bta05221	4	56	0.747974	1	101119242|780504|101111426|100144763	http://www.genome.jp/kegg-bin/show_pathway?bta05221/bta:280832%09red/bta:534923%09red/bta:509613%09red/bta:524530%09red
Tight junction	KEGG PATHWAY	bta04530	10	132	0.755446	1	101121229|101119242|101122295|106991715|101112608|101113649|101106811|101115985|101115864|101123596	http://www.genome.jp/kegg-bin/show_pathway?bta04530/bta:286877%09red/bta:514998%09red/bta:281791%09red/bta:508268%09red/bta:511594%09red/bta:282030%09red/bta:534923%09red/bta:617453%09red/bta:514212%09red/bta:538761%09red
Nicotinate and nicotinamide metabolism	KEGG PATHWAY	bta00760	2	30	0.759084	1	101116575|101104808	http://www.genome.jp/kegg-bin/show_pathway?bta00760/bta:616757%09red/bta:518393%09red
Inflammatory bowel disease (IBD)	KEGG PATHWAY	bta05321	5	70	0.759938	1	101119104|101122484|443206|101118514|101108962	http://www.genome.jp/kegg-bin/show_pathway?bta05321/bta:282534%09red/bta:790858%09red/bta:527470%09red/bta:514889%09red/bta:281249%09red
Endocrine and other factor-regulated calcium reabsorption	KEGG PATHWAY	bta04961	3	44	0.762771	1	101122460|101103585|443228	http://www.genome.jp/kegg-bin/show_pathway?bta04961/bta:287026%09red/bta:407238%09red/bta:536553%09red
Mucin type O-Glycan biosynthesis	KEGG PATHWAY	bta00512	2	31	0.774054	1	101104386|101104903	http://www.genome.jp/kegg-bin/show_pathway?bta00512/bta:540500%09red/bta:617031%09red
Circadian rhythm	KEGG PATHWAY	bta04710	2	31	0.774054	1	100127210|101119104	http://www.genome.jp/kegg-bin/show_pathway?bta04710/bta:527470%09red/bta:538954%09red
Galactose metabolism	KEGG PATHWAY	bta00052	2	32	0.788204	1	100620048|101107690	http://www.genome.jp/kegg-bin/show_pathway?bta00052/bta:788926%09red/bta:281781%09red
Primary bile acid biosynthesis	KEGG PATHWAY	bta00120	1	17	0.791517	1	101117285	http://www.genome.jp/kegg-bin/show_pathway?bta00120/bta:508918%09red
Prostate cancer	KEGG PATHWAY	bta05215	6	87	0.797751	1	101113586|101119242|443318|100144763|101112976|101112600	http://www.genome.jp/kegg-bin/show_pathway?bta05215/bta:513010%09red/bta:281239%09red/bta:534129%09red/bta:524530%09red/bta:534923%09red/bta:613787%09red
Progesterone-mediated oocyte maturation	KEGG PATHWAY	bta04914	6	87	0.797751	1	101119242|101102089|443318|106991715|101117327|443444	http://www.genome.jp/kegg-bin/show_pathway?bta04914/bta:281239%09red/bta:510708%09red/bta:281791%09red/bta:281601%09red/bta:534923%09red/bta:100848466%09red
Base excision repair	KEGG PATHWAY	bta03410	2	33	0.801567	1	101115316|101116176	http://www.genome.jp/kegg-bin/show_pathway?bta03410/bta:511381%09red/bta:785457%09red
Bacterial invasion of epithelial cells	KEGG PATHWAY	bta05100	5	75	0.807344	1	101119747|443076|101111043|101110241|101106774	http://www.genome.jp/kegg-bin/show_pathway?bta05100/bta:280855%09red/bta:535746%09red/bta:615866%09red/bta:524734%09red/bta:282637%09red
Selenocompound metabolism	KEGG PATHWAY	bta00450	1	18	0.808914	1	101122238	http://www.genome.jp/kegg-bin/show_pathway?bta00450/bta:536409%09red
Type II diabetes mellitus	KEGG PATHWAY	bta04930	3	48	0.809422	1	101108767|106991367|101107690	http://www.genome.jp/kegg-bin/show_pathway?bta04930/bta:408013%09red/bta:100300012%09red/bta:788926%09red
N-Glycan biosynthesis	KEGG PATHWAY	bta00510	3	50	0.829687	1	100620048|101108300|100913159	http://www.genome.jp/kegg-bin/show_pathway?bta00510/bta:493992%09red/bta:281781%09red/bta:282073%09red
Other glycan degradation	KEGG PATHWAY	bta00511	1	20	0.839477	1	XLOC_057307	http://www.genome.jp/kegg-bin/show_pathway?bta00511/bta:532207%09red
Long-term potentiation	KEGG PATHWAY	bta04720	4	66	0.845814	1	101117327|101118870|101106989|101103585	http://www.genome.jp/kegg-bin/show_pathway?bta04720/bta:287026%09red/bta:281601%09red/bta:525416%09red/bta:524212%09red
Renal cell carcinoma	KEGG PATHWAY	bta05211	4	66	0.845814	1	101119242|443076|443461|101110391	http://www.genome.jp/kegg-bin/show_pathway?bta05211/bta:534526%09red/bta:534923%09red/bta:280855%09red/bta:282356%09red
Asthma	KEGG PATHWAY	bta05310	2	37	0.8478	1	101118514|101108962	http://www.genome.jp/kegg-bin/show_pathway?bta05310/bta:282534%09red/bta:790858%09red
Phenylalanine metabolism	KEGG PATHWAY	bta00360	1	21	0.852874	1	101109831	http://www.genome.jp/kegg-bin/show_pathway?bta00360/bta:507093%09red
Cytokine-cytokine receptor interaction	KEGG PATHWAY	bta04060	17	238	0.862623	1	101113991|780517|101102850|443175|101118168|443206|780504|554326|101105243|101102957|101122484|101112653|101102873|443088|443076|101119742|443264	http://www.genome.jp/kegg-bin/show_pathway?bta04060/bta:280855%09red/bta:514889%09red/bta:286799%09red/bta:497205%09red/bta:520341%09red/bta:281249%09red/bta:100299249%09red/bta:509038%09red/bta:509585%09red/bta:508044%09red/bta:282382%09red/bta:540595%09red/bta:503620%09red/bta:514239%09red/bta:504507%09red/bta:280832%09red/bta:511771%09red
Jak-STAT signaling pathway	KEGG PATHWAY	bta04630	11	162	0.862856	1	101113991|101111043|101108025|101119242|100144763|101122484|101112653|100147799|101106589|101118168|443264	http://www.genome.jp/kegg-bin/show_pathway?bta04630/bta:497205%09red/bta:514889%09red/bta:504593%09red/bta:509038%09red/bta:100299249%09red/bta:524530%09red/bta:616008%09red/bta:508044%09red/bta:534923%09red/bta:615414%09red/bta:615866%09red
Amyotrophic lateral sclerosis (ALS)	KEGG PATHWAY	bta05014	3	55	0.872406	1	101121018|101106989|106990363	http://www.genome.jp/kegg-bin/show_pathway?bta05014/bta:100850794%09red/bta:537380%09red/bta:524212%09red
Protein export	KEGG PATHWAY	bta03060	1	23	0.876409	1	101104068	http://www.genome.jp/kegg-bin/show_pathway?bta03060/bta:514960%09red
Intestinal immune network for IgA production	KEGG PATHWAY	bta04672	3	56	0.879714	1	101118514|780517|101108962	http://www.genome.jp/kegg-bin/show_pathway?bta04672/bta:282534%09red/bta:790858%09red/bta:504507%09red
Graft-versus-host disease	KEGG PATHWAY	bta05332	2	41	0.884014	1	101118514|101108962	http://www.genome.jp/kegg-bin/show_pathway?bta05332/bta:282534%09red/bta:790858%09red
Leishmaniasis	KEGG PATHWAY	bta05140	4	72	0.887494	1	101118514|101122484|101108962|443218	http://www.genome.jp/kegg-bin/show_pathway?bta05140/bta:282534%09red/bta:280795%09red/bta:790858%09red/bta:514889%09red
MAPK signaling pathway	KEGG PATHWAY	bta04010	18	259	0.892804	1	101121018|101103535|101116150|443218|101104655|101105970|101119242|780460|101113222|101115240|554326|101108767|101117275|101122427|101121162|101110347|101120943|101121934	http://www.genome.jp/kegg-bin/show_pathway?bta04010/bta:528390%09red/bta:540380%09red/bta:286800%09red/bta:538496%09red/bta:282382%09red/bta:533929%09red/bta:408013%09red/bta:531209%09red/bta:505463%09red/bta:536337%09red/bta:528415%09red/bta:617701%09red/bta:510245%09red/bta:534923%09red/bta:280795%09red/bta:537380%09red/bta:524957%09red/bta:519331%09red
Maturity onset diabetes of the young	KEGG PATHWAY	bta04950	1	25	0.89618	1	100534656	http://www.genome.jp/kegg-bin/show_pathway?bta04950/bta:509200%09red
Natural killer cell mediated cytotoxicity	KEGG PATHWAY	bta04650	7	117	0.900575	1	101121838|101112563|443045|114118728|101103958|101122484|101110241	http://www.genome.jp/kegg-bin/show_pathway?bta04650/bta:513308%09red/bta:524734%09red/bta:514889%09red/bta:100126815%09red/bta:281839%09red/bta:508386%09red
Glycosylphosphatidylinositol(GPI)-anchor biosynthesis	KEGG PATHWAY	bta00563	1	26	0.904846	1	101120255	http://www.genome.jp/kegg-bin/show_pathway?bta00563/bta:504583%09red
Cytosolic DNA-sensing pathway	KEGG PATHWAY	bta04623	3	62	0.91622	1	101116705|443206|101111182	http://www.genome.jp/kegg-bin/show_pathway?bta04623/bta:767843%09red/bta:507054%09red/bta:281249%09red
Endocytosis	KEGG PATHWAY	bta04144	14	217	0.921301	1	780504|101111043|106990245|101122295|554326|101122460|443528|101119649|101106563|101120897|101102555|443076|443535|443088	http://www.genome.jp/kegg-bin/show_pathway?bta04144/bta:281276%09red/bta:615866%09red/bta:523797%09red/bta:286877%09red/bta:281802%09red/bta:618009%09red/bta:512450%09red/bta:281604%09red/bta:280855%09red/bta:282382%09red/bta:536553%09red/bta:507572%09red/bta:280832%09red/bta:503620%09red
Hematopoietic cell lineage	KEGG PATHWAY	bta04640	5	94	0.923509	1	101113991|780504|101115115|101119731|101102230	http://www.genome.jp/kegg-bin/show_pathway?bta04640/bta:281052%09red/bta:100299249%09red/bta:786683%09red/bta:280832%09red
Allograft rejection	KEGG PATHWAY	bta05330	2	48	0.928834	1	101118514|101108962	http://www.genome.jp/kegg-bin/show_pathway?bta05330/bta:282534%09red/bta:790858%09red
Notch signaling pathway	KEGG PATHWAY	bta04330	2	48	0.928834	1	101109123|101110361	http://www.genome.jp/kegg-bin/show_pathway?bta04330/bta:512873%09red/bta:528508%09red
RNA polymerase	KEGG PATHWAY	bta03020	1	30	0.932859	1	101111182	http://www.genome.jp/kegg-bin/show_pathway?bta03020/bta:767843%09red
Fc epsilon RI signaling pathway	KEGG PATHWAY	bta04664	3	66	0.934612	1	101119242|101115743|101116150	http://www.genome.jp/kegg-bin/show_pathway?bta04664/bta:534923%09red/bta:529346%09red/bta:531209%09red
Pancreatic cancer	KEGG PATHWAY	bta05212	3	66	0.934612	1	101119242|100144763|554326	http://www.genome.jp/kegg-bin/show_pathway?bta05212/bta:534923%09red/bta:524530%09red/bta:282382%09red
Oocyte meiosis	KEGG PATHWAY	bta04114	6	113	0.938496	1	101102089|101117264|443318|101117327|101118870|443444	http://www.genome.jp/kegg-bin/show_pathway?bta04114/bta:281239%09red/bta:533788%09red/bta:510708%09red/bta:525416%09red/bta:281601%09red/bta:100848466%09red
Apoptosis	KEGG PATHWAY	bta04210	4	84	0.942319	1	101119242|101113991|106990363|101106003	http://www.genome.jp/kegg-bin/show_pathway?bta04210/bta:100850794%09red/bta:534923%09red/bta:100299249%09red/bta:282463%09red
Adherens junction	KEGG PATHWAY	bta04520	3	68	0.942339	1	101119747|443076|554326	http://www.genome.jp/kegg-bin/show_pathway?bta04520/bta:280855%09red/bta:282382%09red/bta:282637%09red
Type I diabetes mellitus	KEGG PATHWAY	bta04940	2	51	0.942522	1	101118514|101108962	http://www.genome.jp/kegg-bin/show_pathway?bta04940/bta:282534%09red/bta:790858%09red
Chemokine signaling pathway	KEGG PATHWAY	bta04062	11	188	0.948848	1	101117327|101103800|101119242|101102089|101122295|106991715|101105243|101106563|100192421|101110241|101103585	http://www.genome.jp/kegg-bin/show_pathway?bta04062/bta:287026%09red/bta:510708%09red/bta:524734%09red/bta:286877%09red/bta:282041%09red/bta:281802%09red/bta:281601%09red/bta:281791%09red/bta:511812%09red/bta:534923%09red/bta:511771%09red
Influenza A	KEGG PATHWAY	bta05164	10	175	0.95074	1	101118514|101108962|101112563|443045|101119242|443206|101112066|101122484|101116705|106990363	http://www.genome.jp/kegg-bin/show_pathway?bta05164/bta:100850794%09red/bta:790858%09red/bta:514889%09red/bta:281249%09red/bta:280897%09red/bta:282534%09red/bta:507054%09red/bta:534923%09red/bta:281839%09red
SNARE interactions in vesicular transport	KEGG PATHWAY	bta04130	1	34	0.952627	1	101112332	http://www.genome.jp/kegg-bin/show_pathway?bta04130/bta:511030%09red
DNA replication	KEGG PATHWAY	bta03030	1	35	0.956583	1	101116176	http://www.genome.jp/kegg-bin/show_pathway?bta03030/bta:785457%09red
Primary immunodeficiency	KEGG PATHWAY	bta05340	1	36	0.960208	1	101115316	http://www.genome.jp/kegg-bin/show_pathway?bta05340/bta:511381%09red
Antigen processing and presentation	KEGG PATHWAY	bta04612	3	74	0.960724	1	101118514|101108962|105609515	http://www.genome.jp/kegg-bin/show_pathway?bta04612/bta:282534%09red/bta:790858%09red/bta:281036%09red
Lysosome	KEGG PATHWAY	bta04142	6	123	0.963088	1	101105605|101108314|101104057|101108802|101121049|101117677	http://www.genome.jp/kegg-bin/show_pathway?bta04142/bta:281421%09red/bta:784163%09red/bta:518974%09red/bta:511839%09red/bta:515687%09red/bta:538401%09red
Tuberculosis	KEGG PATHWAY	bta05152	10	183	0.965158	1	101118514|101108962|101104057|101119242|443206|101122484|101118870|101117677|101104595|106990363	http://www.genome.jp/kegg-bin/show_pathway?bta05152/bta:100850794%09red/bta:790858%09red/bta:514889%09red/bta:281249%09red/bta:518974%09red/bta:511839%09red/bta:282534%09red/bta:512242%09red/bta:525416%09red/bta:534923%09red
VEGF signaling pathway	KEGG PATHWAY	bta04370	2	58	0.965374	1	101119242|101116150	http://www.genome.jp/kegg-bin/show_pathway?bta04370/bta:534923%09red/bta:531209%09red
Regulation of actin cytoskeleton	KEGG PATHWAY	bta04810	12	212	0.966209	1	101121750|443209|101110688|101103800|780460|101104664|101105506|100579169|101105162|101112600|101110391|101119919	http://www.genome.jp/kegg-bin/show_pathway?bta04810/bta:535077%09red/bta:782315%09red/bta:282041%09red/bta:100140050%09red/bta:282644%09red/bta:533929%09red/bta:100137883%09red/bta:523755%09red/bta:534526%09red/bta:533233%09red/bta:613787%09red/bta:506995%09red
Cysteine and methionine metabolism	KEGG PATHWAY	bta00270	1	39	0.969368	1	101104463	http://www.genome.jp/kegg-bin/show_pathway?bta00270/bta:782907%09red
Aldosterone-regulated sodium reabsorption	KEGG PATHWAY	bta04960	1	39	0.969368	1	443318	http://www.genome.jp/kegg-bin/show_pathway?bta04960/bta:281239%09red
Autoimmune thyroid disease	KEGG PATHWAY	bta05320	2	61	0.972221	1	101118514|101108962	http://www.genome.jp/kegg-bin/show_pathway?bta05320/bta:282534%09red/bta:790858%09red
Hepatitis B	KEGG PATHWAY	bta05161	7	149	0.978836	1	101113586|443218|101119242|100144763|101112976|554326|106990363	http://www.genome.jp/kegg-bin/show_pathway?bta05161/bta:100850794%09red/bta:513010%09red/bta:524530%09red/bta:282382%09red/bta:534923%09red/bta:280795%09red/bta:534129%09red
Nucleotide excision repair	KEGG PATHWAY	bta03420	1	44	0.980195	1	101116176	http://www.genome.jp/kegg-bin/show_pathway?bta03420/bta:785457%09red
Hepatitis C	KEGG PATHWAY	bta05160	6	135	0.980613	1	101121229|101119242|101113649|101115864|101106811|443535	http://www.genome.jp/kegg-bin/show_pathway?bta05160/bta:281276%09red/bta:514998%09red/bta:508268%09red/bta:534923%09red/bta:617453%09red/bta:538761%09red
Proteasome	KEGG PATHWAY	bta03050	1	45	0.981849	1	101117634	http://www.genome.jp/kegg-bin/show_pathway?bta03050/bta:614703%09red
Systemic lupus erythematosus	KEGG PATHWAY	bta05322	9	185	0.983968	1	101118514|101106989|101108962|101105026|101122904|101102931|114109686|101115321|101107430	http://www.genome.jp/kegg-bin/show_pathway?bta05322/bta:790858%09red/bta:614974%09red/bta:507706%09red/bta:524212%09red/bta:507339%09red/bta:526766%09red/bta:515440%09red/bta:282534%09red/bta:525511%09red
Toll-like receptor signaling pathway	KEGG PATHWAY	bta04620	4	106	0.984706	1	101119242|101104595|443058|443218	http://www.genome.jp/kegg-bin/show_pathway?bta04620/bta:534923%09red/bta:280795%09red/bta:512242%09red/bta:281499%09red
Basal transcription factors	KEGG PATHWAY	bta03022	1	47	0.984755	1	101122456	http://www.genome.jp/kegg-bin/show_pathway?bta03022/bta:789854%09red
Neurotrophin signaling pathway	KEGG PATHWAY	bta04722	5	124	0.985633	1	101119242|101117275|101118870|101110241|101121018	http://www.genome.jp/kegg-bin/show_pathway?bta04722/bta:534923%09red/bta:537380%09red/bta:525416%09red/bta:524734%09red/bta:617701%09red
MicroRNAs in cancer	KEGG PATHWAY	bta05206	13	247	0.986049	1	101103364|101119213|101115193|106991367|101104664|100147799|100144763|101123374|100820740|101114584|443076|101110241|101120020	http://www.genome.jp/kegg-bin/show_pathway?bta05206/bta:280855%09red/bta:337871%09red/bta:535183%09red/bta:524734%09red/bta:282654%09red/bta:529235%09red/bta:524530%09red/bta:100300012%09red/bta:522467%09red/bta:281671%09red/bta:533233%09red/bta:534323%09red/bta:615414%09red
T cell receptor signaling pathway	KEGG PATHWAY	bta04660	4	108	0.986516	1	101119242|101111043|101110391|443218	http://www.genome.jp/kegg-bin/show_pathway?bta04660/bta:534526%09red/bta:534923%09red/bta:280795%09red/bta:615866%09red
B cell receptor signaling pathway	KEGG PATHWAY	bta04662	2	71	0.986825	1	101119242|443218	http://www.genome.jp/kegg-bin/show_pathway?bta04662/bta:534923%09red/bta:280795%09red
Alcoholism	KEGG PATHWAY	bta05034	11	224	0.989575	1	101103267|101119495|101106989|101113586|101117275|106991715|101112976|114109686|101122904|100192421|101110241	http://www.genome.jp/kegg-bin/show_pathway?bta05034/bta:513010%09red/bta:614974%09red/bta:524734%09red/bta:524212%09red/bta:281791%09red/bta:281792%09red/bta:511812%09red/bta:617701%09red/bta:534129%09red/bta:525511%09red/bta:509084%09red
NOD-like receptor signaling pathway	KEGG PATHWAY	bta04621	1	52	0.990145	1	443206	http://www.genome.jp/kegg-bin/show_pathway?bta04621/bta:281249%09red
Osteoclast differentiation	KEGG PATHWAY	bta04380	5	135	0.992589	1	101119242|101115743|101122484|443218|554326	http://www.genome.jp/kegg-bin/show_pathway?bta04380/bta:534923%09red/bta:280795%09red/bta:282382%09red/bta:514889%09red/bta:529346%09red
mRNA surveillance pathway	KEGG PATHWAY	bta03015	2	93	0.997565	1	101117264|101115117	http://www.genome.jp/kegg-bin/show_pathway?bta03015/bta:533788%09red/bta:282296%09red
Herpes simplex infection	KEGG PATHWAY	bta05168	7	193	0.998191	1	101118514|443218|101122456|101108962|101122484|101119408|106990363	http://www.genome.jp/kegg-bin/show_pathway?bta05168/bta:100850794%09red/bta:790858%09red/bta:789854%09red/bta:514889%09red/bta:282534%09red/bta:507234%09red/bta:280795%09red
Measles	KEGG PATHWAY	bta05162	4	140	0.998362	1	101119242|101122484|100144763|100147799	http://www.genome.jp/kegg-bin/show_pathway?bta05162/bta:534923%09red/bta:524530%09red/bta:615414%09red/bta:514889%09red
RNA transport	KEGG PATHWAY	bta03013	5	160	0.99847	1	101102857|101109898|101111426|101115117|101121147	http://www.genome.jp/kegg-bin/show_pathway?bta03013/bta:515233%09red/bta:509613%09red/bta:282220%09red/bta:282296%09red/bta:515968%09red
RNA degradation	KEGG PATHWAY	bta03018	1	74	0.998556	1	101115117	http://www.genome.jp/kegg-bin/show_pathway?bta03018/bta:282296%09red
Pyrimidine metabolism	KEGG PATHWAY	bta00240	2	102	0.998797	1	101116176|101111182	http://www.genome.jp/kegg-bin/show_pathway?bta00240/bta:767843%09red/bta:785457%09red
Cell cycle	KEGG PATHWAY	bta04110	3	127	0.999022	1	100144763|101115240|100147799	http://www.genome.jp/kegg-bin/show_pathway?bta04110/bta:505463%09red/bta:524530%09red/bta:615414%09red
Ribosome biogenesis in eukaryotes	KEGG PATHWAY	bta03008	1	85	0.999448	1	101114766	http://www.genome.jp/kegg-bin/show_pathway?bta03008/bta:512692%09red
Ribosome	KEGG PATHWAY	bta03010	3	136	0.999496	1	101106848|114114996|121819493	http://www.genome.jp/kegg-bin/show_pathway?bta03010/bta:533310%09red/bta:514966%09red/bta:533285%09red
Protein processing in endoplasmic reticulum	KEGG PATHWAY	bta04141	4	169	0.999784	1	101117150|101114090|105609515|101121018	http://www.genome.jp/kegg-bin/show_pathway?bta04141/bta:525256%09red/bta:281036%09red/bta:537380%09red/bta:504832%09red
Viral carcinogenesis	KEGG PATHWAY	bta05203	8	246	0.999786	1	101113586|100144763|101112976|101117692|100579169|100147799|101119408|101117677	http://www.genome.jp/kegg-bin/show_pathway?bta05203/bta:513010%09red/bta:535077%09red/bta:508148%09red/bta:524530%09red/bta:511839%09red/bta:507234%09red/bta:534129%09red/bta:615414%09red
Epstein-Barr virus infection	KEGG PATHWAY	bta05169	5	193	0.999831	1	101119242|101119408|101112563|443045|101111182	http://www.genome.jp/kegg-bin/show_pathway?bta05169/bta:767843%09red/bta:534923%09red/bta:281839%09red/bta:507234%09red
Spliceosome	KEGG PATHWAY	bta03040	1	130	0.999989	1	101105552	http://www.genome.jp/kegg-bin/show_pathway?bta03040/bta:782669%09red
Ubiquitin mediated proteolysis	KEGG PATHWAY	bta04120	1	138	0.999995	1	101111043	http://www.genome.jp/kegg-bin/show_pathway?bta04120/bta:615866%09red
Olfactory transduction	KEGG PATHWAY	bta04740	5	897	1	1	101118870|114118302|101115078|101121706|100233164	http://www.genome.jp/kegg-bin/show_pathway?bta04740/bta:523394%09red/bta:534256%09red/bta:782577%09red/bta:281701%09red/bta:525416%09red
--------------------
#Term	Database	ID	Input number	Background number	P-Value	Corrected P-Value	Input	Hyperlink
--------------------
#Term	Database	ID	Input number	Background number	P-Value	Corrected P-Value	Input	Hyperlink
--------------------

## Sheet: HUS_vs_SFK.DEG_KEGG_pathway_enr
##Databases: KEGG PATHWAY
##Statistical test method: hypergeometric test / Fisher's exact test
##FDR correction method: Benjamini and Hochberg
#Term	Database	ID	Input number	Background number	P-Value	Corrected P-Value	Input	Hyperlink
Parkinson's disease	KEGG PATHWAY	bta05012	40	154	8.33466e-07	0.000218368	101114007|101106179|101111395|101118985|101108778|101110095|101110664|101108484|101113437|101108285|101113001|101107437|101104823|101115299|101109923|101102527|106990092|100147788|101115434|101108353|101108008|101111413|101108663|101114702|101114570|101121538|101113599|101119489|101123463|101115773|100170667|443410|100270720|101103062|101104796|101121129|101119721|101122393|100145866|106990363	http://www.genome.jp/kegg-bin/show_pathway?bta05012/bta:100850794%09red/bta:288380%09red/bta:281570%09red/bta:338053%09red/bta:512500%09red/bta:338079%09red/bta:616871%09red/bta:287020%09red/bta:282394%09red/bta:282119%09red/bta:540176%09red/bta:327702%09red/bta:326346%09red/bta:327714%09red/bta:327668%09red/bta:616109%09red/bta:100270792%09red/bta:282701%09red/bta:327660%09red/bta:532626%09red/b…
Oxidative phosphorylation	KEGG PATHWAY	bta00190	37	143	2.28152e-06	0.000298879	101114007|101106179|101111395|101118985|101108778|101110095|101110664|101108484|101113437|101108285|101113001|101117677|101104823|101115299|101109923|101102527|101115434|101108353|101108509|101108008|101111413|101105799|101108663|101114702|101114570|101121538|101107153|101113599|101123463|101115773|100170667|443410|100270720|101103062|101121129|101119721|101122393	http://www.genome.jp/kegg-bin/show_pathway?bta00190/bta:281570%09red/bta:338053%09red/bta:512500%09red/bta:338079%09red/bta:616871%09red/bta:287020%09red/bta:282394%09red/bta:540176%09red/bta:327702%09red/bta:326346%09red/bta:327714%09red/bta:327668%09red/bta:616109%09red/bta:100270792%09red/bta:282701%09red/bta:327660%09red/bta:280701%09red/bta:282393%09red/bta:282148%09red/bta:338046%09red/bta:…
Huntington's disease	KEGG PATHWAY	bta05016	43	194	1.0844e-05	0.000947038	101114007|101106179|101122250|101111395|101118985|101108778|101110095|101110664|101108484|101113437|101108285|101113001|101111413|101104823|101115299|106990092|101109923|101102527|101113599|121820619|100147788|101115434|101108353|101103585|101108008|101113882|101108663|101114702|101114570|101121538|101112976|101123463|101115773|100170667|443410|100270720|101112094|101103062|101121129|101119721|10…	http://www.genome.jp/kegg-bin/show_pathway?bta05016/bta:100850794%09red/bta:281570%09red/bta:540601%09red/bta:338053%09red/bta:512500%09red/bta:338079%09red/bta:618422%09red/bta:513105%09red/bta:616871%09red/bta:287026%09red/bta:287020%09red/bta:282394%09red/bta:282119%09red/bta:540176%09red/bta:327702%09red/bta:326346%09red/bta:327714%09red/bta:327668%09red/bta:616109%09red/bta:100270792%09red/b…
Metabolic pathways	KEGG PATHWAY	bta01100	175	1239	2.10614e-05	0.0011628	101113458|101103801|101114659|101112581|101110664|101113599|100270720|101114544|114110822|101105703|101117677|101119850|101116072|100192316|101122393|101118261|101118985|101110414|101108974|443541|106990092|101107828|101110095|101108008|101107484|101111413|101114702|101114570|101111395|101113687|443257|101117174|101117702|443410|101116418|114113035|101113602|101120135|101118274|443091|443093|1011…	http://www.genome.jp/kegg-bin/show_pathway?bta01100/bta:541284%09red/bta:281570%09red/bta:404148%09red/bta:281306%09red/bta:514168%09red/bta:512112%09red/bta:537161%09red/bta:540771%09red/bta:281810%09red/bta:507119%09red/bta:504769%09red/bta:522863%09red/bta:100299006%09red/bta:534090%09red/bta:540176%09red/bta:282073%09red/bta:281785%09red/bta:100337056%09red/bta:282021%09red/bta:102216273%09re…
Non-alcoholic fatty liver disease (NAFLD)	KEGG PATHWAY	bta04932	37	161	2.21908e-05	0.0011628	101114007|101106179|101111395|101118985|101108778|101110095|101110664|101108484|101113437|100294652|101113001|101104823|101109923|101102527|106990092|101116044|443264|101108353|101104483|101108008|101108663|101114702|101121538|101113599|101115773|100170667|100127210|100216465|101123463|100270720|101103062|100329218|101121129|101115434|101119721|101122393|106990363	http://www.genome.jp/kegg-bin/show_pathway?bta04932/bta:100850794%09red/bta:281570%09red/bta:539361%09red/bta:509107%09red/bta:512500%09red/bta:338079%09red/bta:616871%09red/bta:287020%09red/bta:497205%09red/bta:504219%09red/bta:327702%09red/bta:326346%09red/bta:327714%09red/bta:538954%09red/bta:616109%09red/bta:100270792%09red/bta:327660%09red/bta:282393%09red/bta:407234%09red/bta:338046%09red/b…
Alzheimer's disease	KEGG PATHWAY	bta05010	38	180	8.36864e-05	0.0036543	101114007|101106179|101111395|101118985|101108778|101110095|101110664|101108484|101113437|443408|101108285|101113001|101104823|101115299|101109923|101102527|106990092|101119880|101115434|101108353|101103585|101108008|101111413|101108663|101114702|101114570|101121538|101113599|101123463|101115773|100170667|443410|100270720|101103062|101121129|101119721|101122393|106990363	http://www.genome.jp/kegg-bin/show_pathway?bta05010/bta:100850794%09red/bta:281570%09red/bta:338053%09red/bta:512500%09red/bta:338079%09red/bta:280843%09red/bta:616871%09red/bta:287026%09red/bta:287020%09red/bta:282394%09red/bta:540176%09red/bta:327702%09red/bta:326346%09red/bta:327714%09red/bta:327668%09red/bta:616109%09red/bta:100270792%09red/bta:282701%09red/bta:327660%09red/bta:282393%09red/b…
ECM-receptor interaction	KEGG PATHWAY	bta04512	22	85	0.000240579	0.00817911	101114569|101111424|101118494|101113128|101116784|101121444|101112706|101105162|101119919|101106433|101115115|100820740|443140|101114493|100101231|105608408|100216328|101102230|101105588|443058|101106520|101118337	http://www.genome.jp/kegg-bin/show_pathway?bta04512/bta:511602%09red/bta:532572%09red/bta:511043%09red/bta:540664%09red/bta:531254%09red/bta:281052%09red/bta:282654%09red/bta:520030%09red/bta:506751%09red/bta:281530%09red/bta:510833%09red/bta:538590%09red/bta:281069%09red/bta:506995%09red/bta:523526%09red/bta:281499%09red/bta:281873%09red/bta:504323%09red/bta:530102%09red/bta:785805%09red/bta:523…
Carbon metabolism	KEGG PATHWAY	bta01200	25	104	0.000249744	0.00817911	101120382|101108592|780456|101119850|101107229|101109822|443541|101111328|101114294|100135441|101110118|101107484|101113460|443257|101104080|101117702|101105152|101113602|100192316|101107690|101112791|443091|443093|101114126|101115360	http://www.genome.jp/kegg-bin/show_pathway?bta01200/bta:404148%09red/bta:281306%09red/bta:508170%09red/bta:505103%09red/bta:507119%09red/bta:514066%09red/bta:511090%09red/bta:618400%09red/bta:513453%09red/bta:281810%09red/bta:506459%09red/bta:282873%09red/bta:445425%09red/bta:533910%09red/bta:286886%09red/bta:281235%09red/bta:511222%09red/bta:514939%09red/bta:512995%09red/bta:613338%09red/bta:534…
Glycerolipid metabolism	KEGG PATHWAY	bta00561	16	57	0.000786252	0.0228887	101102720|101122246|121817901|101112654|101117659|101110535|101114659|101111235|101116033|101119394|101111913|443408|101107246|101120972|101114511|101117229	http://www.genome.jp/kegg-bin/show_pathway?bta00561/bta:497202%09red/bta:785489%09red/bta:518523%09red/bta:786474%09red/bta:507456%09red/bta:537171%09red/bta:506607%09red/bta:507949%09red/bta:541284%09red/bta:618076%09red/bta:519739%09red/bta:512112%09red/bta:280843%09red/bta:404129%09red
Staphylococcus aureus infection	KEGG PATHWAY	bta05150	16	61	0.0014377	0.0376677	101108131|101113211|100192432|101115321|101108696|443045|101114941|101112891|101123401|106990096|641296|101119342|101115705|114117340|101111065|101109747	http://www.genome.jp/kegg-bin/show_pathway?bta05150/bta:280678%09red/bta:503555%09red/bta:101903005%09red/bta:505647%09red/bta:522347%09red/bta:280677%09red/bta:515440%09red/bta:524810%09red/bta:282229%09red/bta:506214%09red/bta:280816%09red/bta:100848815%09red/bta:281839%09red/bta:281874%09red
Steroid hormone biosynthesis	KEGG PATHWAY	bta00140	15	57	0.0019438	0.0462978	101110727|100913161|101120331|114114084|101119706|101105400|442993|101103641|443409|100568286|114117992|100820756|101112384|114108656|105614373	http://www.genome.jp/kegg-bin/show_pathway?bta00140/bta:513855%09red/bta:511470%09red/bta:533086%09red/bta:100337056%09red/bta:527024%09red/bta:515710%09red/bta:286792%09red/bta:282211%09red/bta:280934%09red/bta:282214%09red/bta:282589%09red/bta:504769%09red
Protein digestion and absorption	KEGG PATHWAY	bta04974	19	83	0.00212567	0.0464104	101102992|494437|100101231|101119401|101111152|101103020|101111424|101118494|101120753|101114569|101113128|101111950|101112706|443514|101118148|101123433|101114493|101106802|101120054	http://www.genome.jp/kegg-bin/show_pathway?bta04974/bta:407112%09red/bta:511602%09red/bta:282353%09red/bta:521058%09red/bta:533456%09red/bta:531254%09red/bta:538590%09red/bta:504822%09red/bta:510039%09red/bta:282195%09red/bta:523526%09red/bta:510833%09red/bta:782166%09red/bta:535601%09red/bta:515161%09red/bta:280781%09red/bta:530102%09red/bta:785805%09red/bta:540307%09red
Malaria	KEGG PATHWAY	bta05144	14	53	0.00263175	0.0492047	100885767|443045|114110673|554323|443206|101114226|101115115|101116784|100049064|101108797|641296|101113636|101106433|101102230	http://www.genome.jp/kegg-bin/show_pathway?bta05144/bta:504323%09red/bta:100140149%09red/bta:281249%09red/bta:281052%09red/bta:282118%09red/bta:281530%09red/bta:538957%09red/bta:534578%09red/bta:444863%09red/bta:281839%09red/bta:281874%09red/bta:100850059%09red
Citrate cycle (TCA cycle)	KEGG PATHWAY	bta00020	10	30	0.00265282	0.0492047	101110118|101113602|101107484|101112791|443091|654404|443257|101104080|101115360|101105152	http://www.genome.jp/kegg-bin/show_pathway?bta00020/bta:512995%09red/bta:511090%09red/bta:613338%09red/bta:534599%09red/bta:407109%09red/bta:338471%09red/bta:281306%09red/bta:281235%09red/bta:533910%09red/bta:511135%09red
Propanoate metabolism	KEGG PATHWAY	bta00640	9	25	0.00281706	0.0492047	101113602|101122299|101103801|100192316|443186|101118261|101114126|780456|101117702	http://www.genome.jp/kegg-bin/show_pathway?bta00640/bta:281275%09red/bta:511090%09red/bta:508170%09red/bta:282873%09red/bta:281810%09red/bta:506459%09red/bta:531552%09red/bta:281590%09red/bta:512341%09red
African trypanosomiasis	KEGG PATHWAY	bta05143	11	37	0.00346292	0.0567054	101118410|101113211|443045|114110673|443206|101114226|101113636|101108797|101117785|100049064|101103585	http://www.genome.jp/kegg-bin/show_pathway?bta05143/bta:100140149%09red/bta:281249%09red/bta:534578%09red/bta:282118%09red/bta:287026%09red/bta:281631%09red/bta:524810%09red/bta:282325%09red/bta:281839%09red/bta:100850059%09red
Butanoate metabolism	KEGG PATHWAY	bta00650	9	28	0.0052045	0.0802106	100192316|101114977|101121307|101120375|101122979|101107828|101104112|101120794|101119850	http://www.genome.jp/kegg-bin/show_pathway?bta00650/bta:100299006%09red/bta:407767%09red/bta:534090%09red/bta:281810%09red/bta:505842%09red/bta:532724%09red/bta:511222%09red/bta:533798%09red/bta:282576%09red
Fat digestion and absorption	KEGG PATHWAY	bta04975	11	44	0.0101553	0.147816	101122246|443093|101110535|121817901|101108999|101115115|101114511|101103632|101117785|101117229|101102230	http://www.genome.jp/kegg-bin/show_pathway?bta04975/bta:281052%09red/bta:281631%09red/bta:286886%09red/bta:327700%09red/bta:618076%09red/bta:504978%09red/bta:512112%09red/bta:404129%09red
AMPK signaling pathway	KEGG PATHWAY	bta04152	22	124	0.0137143	0.189113	101108592|101117264|101107621|100294652|101113460|101102230|100170327|101122299|443186|101115115|101118685|100534656|443264|101104483|101113882|101116044|101121655|100144763|101112976|100127210|101113409|100329218	http://www.genome.jp/kegg-bin/show_pathway?bta04152/bta:533788%09red/bta:509290%09red/bta:497205%09red/bta:281052%09red/bta:504219%09red/bta:407234%09red/bta:524530%09red/bta:539361%09red/bta:534129%09red/bta:509200%09red/bta:280991%09red/bta:537451%09red/bta:281590%09red/bta:538954%09red/bta:281152%09red/bta:407183%09red/bta:514066%09red/bta:507119%09red/bta:532330%09red/bta:513105%09red/bta:512…
Fatty acid metabolism	KEGG PATHWAY	bta01212	11	47	0.015022	0.196789	100170327|101120135|100192316|101118274|101109685|443186|101110905|101118317|101111925|101108615|101119850	http://www.genome.jp/kegg-bin/show_pathway?bta01212/bta:281590%09red/bta:533333%09red/bta:281811%09red/bta:281810%09red/bta:504502%09red/bta:281152%09red/bta:537161%09red/bta:522006%09red/bta:511222%09red/bta:613886%09red/bta:521822%09red
Complement and coagulation cascades	KEGG PATHWAY	bta04610	15	75	0.0163131	0.197394	101103256|101120391|101102522|101114941|101105026|101116376|101112891|101108612|106990096|443017|101115321|101115705|114117340|101111065|101108131	http://www.genome.jp/kegg-bin/show_pathway?bta04610/bta:508763%09red/bta:280678%09red/bta:617881%09red/bta:505647%09red/bta:533547%09red/bta:526766%09red/bta:522347%09red/bta:280677%09red/bta:513217%09red/bta:280816%09red/bta:515440%09red/bta:407126%09red/bta:281529%09red
Fatty acid elongation	KEGG PATHWAY	bta00062	7	23	0.016575	0.197394	101106896|100192316|101118274|101109685|101108515|101111925|101120135	http://www.genome.jp/kegg-bin/show_pathway?bta00062/bta:533333%09red/bta:281811%09red/bta:281810%09red/bta:539782%09red/bta:522006%09red/bta:614096%09red/bta:613886%09red
Vitamin B6 metabolism	KEGG PATHWAY	bta00750	4	8	0.0190383	0.208948	101120382|443049|101104808|101117174	http://www.genome.jp/kegg-bin/show_pathway?bta00750/bta:514168%09red/bta:518393%09red/bta:533044%09red/bta:512573%09red
Porphyrin and chlorophyll metabolism	KEGG PATHWAY	bta00860	9	36	0.0191403	0.208948	101120910|443053|101112853|101121993|101119750|442993|100528012|101115684|101106393	http://www.genome.jp/kegg-bin/show_pathway?bta00860/bta:534286%09red/bta:510679%09red/bta:526230%09red/bta:286792%09red/bta:515614%09red/bta:281650%09red/bta:514194%09red/bta:511791%09red/bta:513221%09red
Glycine, serine and threonine metabolism	KEGG PATHWAY	bta00260	10	43	0.0205908	0.215791	101106401|101106659|101120382|101112853|101114294|101111913|101118164|101111328|101115684|101105152	http://www.genome.jp/kegg-bin/show_pathway?bta00260/bta:534286%09red/bta:338445%09red/bta:404148%09red/bta:281293%09red/bta:507949%09red/bta:533044%09red/bta:533910%09red/bta:511791%09red/bta:505103%09red/bta:511957%09red
p53 signaling pathway	KEGG PATHWAY	bta04115	14	71	0.0218534	0.219731	114113041|101110288|101106433|101113683|100144763|100302546|106990092|101105532|101102510|100147799|101120694|100302083|114113021|106990363	http://www.genome.jp/kegg-bin/show_pathway?bta04115/bta:100850794%09red/bta:518897%09red/bta:515914%09red/bta:509485%09red/bta:616369%09red/bta:513497%09red/bta:524530%09red/bta:540733%09red/bta:281530%09red/bta:327679%09red/bta:614739%09red/bta:538512%09red/bta:615414%09red
2-Oxocarboxylic acid metabolism	KEGG PATHWAY	bta01210	6	19	0.022644	0.219731	114113035|101112791|443093|101109822|443257|101104080	http://www.genome.jp/kegg-bin/show_pathway?bta01210/bta:512995%09red/bta:613338%09red/bta:618400%09red/bta:520638%09red/bta:281235%09red/bta:286886%09red
Tryptophan metabolism	KEGG PATHWAY	bta00380	10	45	0.0261745	0.244919	114113035|101106401|101106659|100192316|101112561|101115360|101119706|101104808|101123289|XLOC_041294	http://www.genome.jp/kegg-bin/show_pathway?bta00380/bta:509751%09red/bta:511470%09red/bta:527922%09red/bta:534599%09red/bta:338445%09red/bta:520638%09red/bta:281293%09red/bta:281810%09red/bta:518393%09red
Focal adhesion	KEGG PATHWAY	bta04510	31	206	0.0276202	0.249534	101106012|101114569|101111424|101118494|101122194|101113128|101116784|101121444|100294652|101105162|101119919|101118410|101104655|101106433|100820740|101113847|443140|101114493|100101231|101110137|105608408|100144763|100216328|101119602|101105588|443058|101106520|100147799|101123330|101112706|101118337	http://www.genome.jp/kegg-bin/show_pathway?bta04510/bta:515718%09red/bta:533455%09red/bta:531254%09red/bta:282654%09red/bta:520030%09red/bta:281020%09red/bta:510833%09red/bta:538590%09red/bta:282325%09red/bta:523526%09red/bta:281499%09red/bta:281069%09red/bta:524770%09red/bta:282301%09red/bta:511602%09red/bta:532572%09red/bta:540664%09red/bta:613533%09red/bta:523755%09red/bta:528415%09red/bta:281…
Valine, leucine and isoleucine degradation	KEGG PATHWAY	bta00280	10	46	0.0293388	0.256226	101111925|100192316|101109685|101104808|101122979|101119880|101117702|101113789|101105152|101119850	http://www.genome.jp/kegg-bin/show_pathway?bta00280/bta:281809%09red/bta:407767%09red/bta:533910%09red/bta:281810%09red/bta:522006%09red/bta:281811%09red/bta:508170%09red/bta:512070%09red/bta:511222%09red/bta:518393%09red
Biosynthesis of amino acids	KEGG PATHWAY	bta01230	14	75	0.0312645	0.264235	114113035|101120382|101108592|101107484|101107229|101112791|443093|101109822|101108974|443257|101104080|101111328|101114294|100135441	http://www.genome.jp/kegg-bin/show_pathway?bta01230/bta:514759%09red/bta:613338%09red/bta:618400%09red/bta:520638%09red/bta:404148%09red/bta:513453%09red/bta:338471%09red/bta:533044%09red/bta:445425%09red/bta:281235%09red/bta:505103%09red/bta:512995%09red/bta:286886%09red/bta:507119%09red
Arrhythmogenic right ventricular cardiomyopathy (ARVC)	KEGG PATHWAY	bta05412	13	69	0.0350278	0.278099	780521|100170321|101118655|114110852|101104733|101119169|101123346|101105162|101122194|101117308|443140|101121501|101119919	http://www.genome.jp/kegg-bin/show_pathway?bta05412/bta:445543%09red/bta:508151%09red/bta:537784%09red/bta:526848%09red/bta:535399%09red/bta:281062%09red/bta:780777%09red/bta:514360%09red/bta:280765%09red/bta:281873%09red/bta:506995%09red/bta:524770%09red/bta:523755%09red
Chemical carcinogenesis	KEGG PATHWAY	bta05204	13	69	0.0350278	0.278099	443054|101110727|114115282|101106720|101115574|101119706|442993|443409|101112365|100141301|114117992|101103462|105614373	http://www.genome.jp/kegg-bin/show_pathway?bta05204/bta:510551%09red/bta:511470%09red/bta:521685%09red/bta:493719%09red/bta:615552%09red/bta:286792%09red/bta:282214%09red/bta:507346%09red/bta:777644%09red/bta:282589%09red/bta:504769%09red
Retinol metabolism	KEGG PATHWAY	bta00830	11	57	0.0439746	0.328603	101110727|114115282|101121875|442993|101119050|101104808|101105400|114117992|101121241|101116487|105614373	http://www.genome.jp/kegg-bin/show_pathway?bta00830/bta:282852%09red/bta:510551%09red/bta:533086%09red/bta:281360%09red/bta:286792%09red/bta:282214%09red/bta:521298%09red/bta:534696%09red/bta:518393%09red/bta:504769%09red
Drug metabolism - cytochrome P450	KEGG PATHWAY	bta00982	11	57	0.0439746	0.328603	443054|101106401|114115282|101106659|101106720|101115574|101104808|442993|101112365|100141301|101103462	http://www.genome.jp/kegg-bin/show_pathway?bta00982/bta:510551%09red/bta:521685%09red/bta:338445%09red/bta:493719%09red/bta:615552%09red/bta:281293%09red/bta:286792%09red/bta:507346%09red/bta:777644%09red/bta:518393%09red
Nitrogen metabolism	KEGG PATHWAY	bta00910	5	17	0.0451515	0.328603	114108602|101104372|101103199|101117861|101111288	http://www.genome.jp/kegg-bin/show_pathway?bta00910/bta:514494%09red/bta:614323%09red/bta:281785%09red/bta:509027%09red/bta:280742%09red
Glutathione metabolism	KEGG PATHWAY	bta00480	10	52	0.0541117	0.381814	443054|101106720|101115574|443541|101114544|443257|100141301|114110822|101103462|101112365	http://www.genome.jp/kegg-bin/show_pathway?bta00480/bta:525059%09red/bta:521685%09red/bta:281365%09red/bta:615552%09red/bta:281235%09red/bta:493719%09red/bta:507346%09red/bta:777644%09red/bta:514939%09red
Pyruvate metabolism	KEGG PATHWAY	bta00620	8	38	0.0553776	0.381814	101110118|101107484|443186|443091|101118261|101114126|780456|101105152	http://www.genome.jp/kegg-bin/show_pathway?bta00620/bta:281275%09red/bta:282873%09red/bta:407109%09red/bta:338471%09red/bta:281306%09red/bta:533910%09red/bta:281590%09red/bta:506459%09red
Glycerophospholipid metabolism	KEGG PATHWAY	bta00564	15	91	0.0592433	0.397993	101102720|101107246|101112654|101111235|101114659|443090|101110414|XLOC_037183|101116033|101119394|101104692|101113687|101103632|101120972|101114511	http://www.genome.jp/kegg-bin/show_pathway?bta00564/bta:497202%09red/bta:785489%09red/bta:541284%09red/bta:514456%09red/bta:519739%09red/bta:506607%09red/bta:518523%09red/bta:525042%09red/bta:537171%09red/bta:504978%09red/bta:614834%09red/bta:510274%09red/bta:512112%09red/bta:504948%09red/bta:507456%09red
PI3K-Akt signaling pathway	KEGG PATHWAY	bta04151	45	346	0.0655355	0.429257	101113991|101113211|101114569|101111424|101106012|101117264|101118494|101113128|101116784|101121444|100294652|780452|101105162|100302083|101119919|100101231|101106433|101109969|101118685|100820740|443140|101114493|101113882|101109353|105608408|101104200|100144763|101112976|101107460|100216328|100127210|100216465|101113409|101119602|780504|101105588|780460|443058|101106520|101111138|443074|1001477…	http://www.genome.jp/kegg-bin/show_pathway?bta04151/bta:532829%09red/bta:531254%09red/bta:282654%09red/bta:513497%09red/bta:520030%09red/bta:533929%09red/bta:509107%09red/bta:510833%09red/bta:538590%09red/bta:523526%09red/bta:281499%09red/bta:281069%09red/bta:513105%09red/bta:282301%09red/bta:617915%09red/bta:532572%09red/bta:533788%09red/bta:287022%09red/bta:280832%09red/bta:100299249%09red/bta:…
Amoebiasis	KEGG PATHWAY	bta05146	18	117	0.0675493	0.431657	101118410|101113211|101114569|100101231|101105588|101102522|554323|101105026|101106520|101113128|101121444|101112706|100216328|101122194|101121067|101103585|101105044|101114493	http://www.genome.jp/kegg-bin/show_pathway?bta05146/bta:511602%09red/bta:513217%09red/bta:287026%09red/bta:511043%09red/bta:524810%09red/bta:532572%09red/bta:531254%09red/bta:520030%09red/bta:526766%09red/bta:505184%09red/bta:510833%09red/bta:538590%09red/bta:538957%09red/bta:281789%09red/bta:523526%09red/bta:506751%09red/bta:524770%09red/bta:282325%09red
Peroxisome	KEGG PATHWAY	bta04146	13	80	0.0812577	0.506893	101118659|101122299|101111626|101119050|101108576|101106409|101113026|101113900|101120966|101121271|443257|101110905|101105648	http://www.genome.jp/kegg-bin/show_pathway?bta04146/bta:535727%09red/bta:513533%09red/bta:281360%09red/bta:281235%09red/bta:281997%09red/bta:533077%09red/bta:526059%09red/bta:617491%09red/bta:537161%09red/bta:530653%09red/bta:512902%09red/bta:281092%09red/bta:512341%09red
Metabolism of xenobiotics by cytochrome P450	KEGG PATHWAY	bta00980	10	58	0.0897893	0.547088	443054|114115282|101106720|101115574|101119706|442993|443409|101112365|100141301|101103462	http://www.genome.jp/kegg-bin/show_pathway?bta00980/bta:510551%09red/bta:511470%09red/bta:521685%09red/bta:493719%09red/bta:615552%09red/bta:286792%09red/bta:507346%09red/bta:777644%09red/bta:282589%09red
Biosynthesis of unsaturated fatty acids	KEGG PATHWAY	bta01040	5	22	0.0951351	0.566486	101118274|101106409|101120135|100192316|101108615	http://www.genome.jp/kegg-bin/show_pathway?bta01040/bta:530653%09red/bta:521822%09red/bta:281810%09red/bta:533333%09red/bta:613886%09red
Nicotinate and nicotinamide metabolism	KEGG PATHWAY	bta00760	6	30	0.106452	0.619786	101123048|101116072|101113423|101109937|101104808|101104592	http://www.genome.jp/kegg-bin/show_pathway?bta00760/bta:100337285%09red/bta:615535%09red/bta:513419%09red/bta:616992%09red/bta:518393%09red/bta:522863%09red
Small cell lung cancer	KEGG PATHWAY	bta05222	13	87	0.124802	0.693187	101119602|101113128|101105588|101111845|100144763|101106520|106990092|101121444|100294652|100216328|101119408|101112706|106990363	http://www.genome.jp/kegg-bin/show_pathway?bta05222/bta:100850794%09red/bta:532572%09red/bta:511043%09red/bta:509500%09red/bta:524530%09red/bta:520030%09red/bta:281020%09red/bta:523526%09red/bta:280991%09red/bta:507234%09red/bta:506751%09red/bta:511602%09red
PPAR signaling pathway	KEGG PATHWAY	bta03320	11	71	0.127581	0.693187	101108576|101111845|101108999|101104743|101115115|101118317|443408|101110905|101117785|101108615|101102230	http://www.genome.jp/kegg-bin/show_pathway?bta03320/bta:535727%09red/bta:281052%09red/bta:509500%09red/bta:281631%09red/bta:327700%09red/bta:504502%09red/bta:537062%09red/bta:537161%09red/bta:280843%09red/bta:521822%09red
Glycolysis / Gluconeogenesis	KEGG PATHWAY	bta00010	10	63	0.128205	0.693187	101110118|101108592|101113460|101107690|101118261|101114294|101114126|780456|114115282|101105152	http://www.genome.jp/kegg-bin/show_pathway?bta00010/bta:510551%09red/bta:281275%09red/bta:282873%09red/bta:407109%09red/bta:788926%09red/bta:533910%09red/bta:404148%09red/bta:507119%09red/bta:506459%09red/bta:514066%09red
Fructose and mannose metabolism	KEGG PATHWAY	bta00051	6	32	0.129642	0.693187	101108592|101113460|101107690|101103393|101107621|101105711	http://www.genome.jp/kegg-bin/show_pathway?bta00051/bta:788926%09red/bta:510978%09red/bta:537070%09red/bta:407183%09red/bta:507119%09red/bta:514066%09red
One carbon pool by folate	KEGG PATHWAY	bta00670	4	18	0.136396	0.701807	101102845|100137069|100037674|100913154	http://www.genome.jp/kegg-bin/show_pathway?bta00670/bta:505677%09red/bta:513372%09red/bta:517539%09red/bta:507631%09red
Rheumatoid arthritis	KEGG PATHWAY	bta05323	14	97	0.136611	0.701807	101113211|443040|101108696|443218|443045|554323|443206|101104200|101108509|641296|101119342|497271|101117677|101109747	http://www.genome.jp/kegg-bin/show_pathway?bta05323/bta:282148%09red/bta:281094%09red/bta:281249%09red/bta:101903005%09red/bta:511839%09red/bta:524810%09red/bta:538957%09red/bta:506214%09red/bta:282140%09red/bta:281732%09red/bta:280795%09red/bta:100848815%09red/bta:281839%09red/bta:281874%09red
Axon guidance	KEGG PATHWAY	bta04360	17	124	0.146815	0.73676	101107068|101113580|101112777|105607800|101103695|101113454|101113839|101106389|101111871|101121716|100125611|101119989|101114662|100125614|101108158|101122928|101103596	http://www.genome.jp/kegg-bin/show_pathway?bta04360/bta:535644%09red/bta:535137%09red/bta:539996%09red/bta:539452%09red/bta:100337226%09red/bta:537777%09red/bta:510761%09red/bta:534164%09red/bta:510140%09red/bta:528664%09red/bta:534842%09red/bta:522767%09red/bta:100336601%09red/bta:540756%09red/bta:534731%09red/bta:524942%09red/bta:540907%09red
Pentose phosphate pathway	KEGG PATHWAY	bta00030	5	26	0.149039	0.73676	101108592|101113460|100135441|101107229|443541	http://www.genome.jp/kegg-bin/show_pathway?bta00030/bta:513453%09red/bta:507119%09red/bta:445425%09red/bta:514939%09red/bta:514066%09red
Fatty acid degradation	KEGG PATHWAY	bta00071	7	42	0.157427	0.763812	114115282|100192316|101111925|101109685|101110905|101118317|101119850	http://www.genome.jp/kegg-bin/show_pathway?bta00071/bta:510551%09red/bta:281811%09red/bta:281810%09red/bta:504502%09red/bta:537161%09red/bta:522006%09red/bta:511222%09red
Cell adhesion molecules (CAMs)	KEGG PATHWAY	bta04514	20	154	0.1718	0.806873	101108158|443040|100170321|101108696|443045|101121565|101114226|101119516|101113636|101122716|101102362|101113649|101116672|101105675|641296|101119342|101106811|101106322|101106820|101109747	http://www.genome.jp/kegg-bin/show_pathway?bta04514/bta:100337375%09red/bta:282118%09red/bta:101903005%09red/bta:534578%09red/bta:281051%09red/bta:528664%09red/bta:525796%09red/bta:531178%09red/bta:281874%09red/bta:281062%09red/bta:508268%09red/bta:281732%09red/bta:506214%09red/bta:540576%09red/bta:781106%09red/bta:100848815%09red/bta:281839%09red/bta:538761%09red/bta:539462%09red/bta:513034%09red
Viral myocarditis	KEGG PATHWAY	bta05416	10	68	0.174121	0.806873	101113211|101108696|443045|100144763|101116618|106990092|101109747|641296|101119342|106990363	http://www.genome.jp/kegg-bin/show_pathway?bta05416/bta:100850794%09red/bta:101903005%09red/bta:524530%09red/bta:524810%09red/bta:281733%09red/bta:100848815%09red/bta:281839%09red/bta:281874%09red/bta:506214%09red
Fatty acid biosynthesis	KEGG PATHWAY	bta00061	3	13	0.175541	0.806873	443186|100170327|101110905	http://www.genome.jp/kegg-bin/show_pathway?bta00061/bta:281152%09red/bta:281590%09red/bta:537161%09red
Arginine and proline metabolism	KEGG PATHWAY	bta00330	9	61	0.188265	0.850437	114108602|101106401|101106659|101112561|443093|101108974|101104856|100190977|114110822	http://www.genome.jp/kegg-bin/show_pathway?bta00330/bta:509751%09red/bta:514759%09red/bta:338445%09red/bta:281365%09red/bta:281293%09red/bta:414348%09red/bta:100851864%09red/bta:286886%09red/bta:281785%09red
Insulin signaling pathway	KEGG PATHWAY	bta04910	18	140	0.197201	0.869491	101104483|100170327|101111043|101107865|101121655|101107690|101114404|443186|101122295|101113460|100329218|101118685|101115272|100294652|101113847|100127210|442998|101122519	http://www.genome.jp/kegg-bin/show_pathway?bta04910/bta:525906%09red/bta:100139988%09red/bta:615866%09red/bta:533455%09red/bta:286877%09red/bta:788926%09red/bta:504219%09red/bta:539361%09red/bta:532330%09red/bta:538519%09red/bta:280991%09red/bta:281590%09red/bta:538954%09red/bta:281152%09red/bta:327664%09red/bta:533171%09red/bta:537451%09red/bta:514066%09red
Cardiac muscle contraction	KEGG PATHWAY	bta04260	11	79	0.19912	0.869491	101110095|101102527|101108778|101108663|100170667|101110664|101121538|101113599|101119721|101118148|101113001	http://www.genome.jp/kegg-bin/show_pathway?bta04260/bta:616871%09red/bta:287012%09red/bta:281570%09red/bta:444878%09red/bta:515161%09red/bta:282394%09red/bta:512500%09red/bta:282393%09red/bta:616109%09red/bta:287020%09red/bta:100270792%09red
Adipocytokine signaling pathway	KEGG PATHWAY	bta04920	10	71	0.2049	0.880061	101104483|101116044|101121655|101111845|101115115|100294652|101110905|100127210|443264|101102230	http://www.genome.jp/kegg-bin/show_pathway?bta04920/bta:497205%09red/bta:281052%09red/bta:504219%09red/bta:538954%09red/bta:509500%09red/bta:280991%09red/bta:537161%09red/bta:407234%09red/bta:532330%09red
Tyrosine metabolism	KEGG PATHWAY	bta00350	6	38	0.2115	0.893758	101106401|114115282|101106659|443093|101104808|100034666	http://www.genome.jp/kegg-bin/show_pathway?bta00350/bta:510551%09red/bta:338445%09red/bta:282105%09red/bta:281293%09red/bta:286886%09red/bta:518393%09red
Phagosome	KEGG PATHWAY	bta04145	20	161	0.219803	0.9141	101120299|101108131|101113211|100192432|101102057|101111081|101109747|101106433|443033|101115115|101116784|101123401|101108509|101106452|105609515|101119342|443140|101102230|101117677|101108696	http://www.genome.jp/kegg-bin/show_pathway?bta04145/bta:613991%09red/bta:281530%09red/bta:281111%09red/bta:503555%09red/bta:101903005%09red/bta:282148%09red/bta:281052%09red/bta:281036%09red/bta:280677%09red/bta:511839%09red/bta:524810%09red/bta:282229%09red/bta:317777%09red/bta:513266%09red/bta:407213%09red/bta:100848815%09red/bta:504323%09red/bta:281873%09red/bta:506214%09red
Legionellosis	KEGG PATHWAY	bta05134	8	56	0.229036	0.929634	106990092|443206|101112844|101103565|101109898|101108131|106990363|101117580	http://www.genome.jp/kegg-bin/show_pathway?bta05134/bta:100850794%09red/bta:281249%09red/bta:515233%09red/bta:280677%09red/bta:515999%09red/bta:281831%09red/bta:617809%09red
Histidine metabolism	KEGG PATHWAY	bta00340	4	23	0.230634	0.929634	101106401|101102876|101106659|101112561	http://www.genome.jp/kegg-bin/show_pathway?bta00340/bta:509751%09red/bta:281293%09red/bta:613413%09red/bta:338445%09red
Leukocyte transendothelial migration	KEGG PATHWAY	bta04670	15	119	0.244184	0.954869	101109786|101118410|101106906|443045|101110137|101114226|101113636|101123346|101122194|101102362|101113649|641296|101106452|101106811|101121501	http://www.genome.jp/kegg-bin/show_pathway?bta04670/bta:515718%09red/bta:541008%09red/bta:535383%09red/bta:534578%09red/bta:282118%09red/bta:526848%09red/bta:281874%09red/bta:780777%09red/bta:508268%09red/bta:282325%09red/bta:281111%09red/bta:281839%09red/bta:538761%09red/bta:524770%09red/bta:513034%09red
Toxoplasmosis	KEGG PATHWAY	bta05145	15	119	0.244184	0.954869	101119602|101119495|101108696|101105588|554323|101112844|101106520|106990092|101121444|100294652|443535|100216328|101119342|106990363|101109747	http://www.genome.jp/kegg-bin/show_pathway?bta05145/bta:100850794%09red/bta:281276%09red/bta:511043%09red/bta:532572%09red/bta:101903005%09red/bta:520030%09red/bta:281020%09red/bta:281831%09red/bta:281792%09red/bta:538957%09red/bta:506214%09red/bta:280991%09red/bta:100848815%09red/bta:506751%09red
Glycosaminoglycan biosynthesis - heparan sulfate / heparin	KEGG PATHWAY	bta00534	4	24	0.251151	0.967671	101110034|101112819|101104909|101110949	http://www.genome.jp/kegg-bin/show_pathway?bta00534/bta:538566%09red/bta:538691%09red/bta:529260%09red/bta:517768%09red
Dopaminergic synapse	KEGG PATHWAY	bta04728	16	130	0.261669	0.983625	101118410|101106401|101119495|101113882|443218|101106659|101117264|101104796|100037703|101112976|100294652|443274|101123531|100216465|101113409|101103585	http://www.genome.jp/kegg-bin/show_pathway?bta04728/bta:101909126%09red/bta:287026%09red/bta:533788%09red/bta:509290%09red/bta:338445%09red/bta:529590%09red/bta:281293%09red/bta:509107%09red/bta:282471%09red/bta:281792%09red/bta:280991%09red/bta:282325%09red/bta:280795%09red/bta:534129%09red/bta:514261%09red/bta:513105%09red
Cholinergic synapse	KEGG PATHWAY	bta04725	14	112	0.262801	0.983625	101119602|101118410|101119495|101113882|443218|101123239|101123388|100174987|101112976|100294652|101123499|100216465|101108203|101103585	http://www.genome.jp/kegg-bin/show_pathway?bta04725/bta:287026%09red/bta:538479%09red/bta:281020%09red/bta:509107%09red/bta:613605%09red/bta:281792%09red/bta:535603%09red/bta:280991%09red/bta:282181%09red/bta:282702%09red/bta:280795%09red/bta:534129%09red/bta:513105%09red/bta:282325%09red
Rap1 signaling pathway	KEGG PATHWAY	bta04015	25	214	0.270987	0.98988	101109786|101106012|100294652|101105703|101110290|101118410|101119495|101122295|101109969|101103280|101103585|101114407|101109353|101104200|101113058|101107460|641296|780504|101121871|780460|101111138|101108203|497271|101106433|443074	http://www.genome.jp/kegg-bin/show_pathway?bta04015/bta:532829%09red/bta:519037%09red/bta:506769%09red/bta:282325%09red/bta:282301%09red/bta:617915%09red/bta:287026%09red/bta:535383%09red/bta:509418%09red/bta:281874%09red/bta:536517%09red/bta:281160%09red/bta:535603%09red/bta:281963%09red/bta:533929%09red/bta:282140%09red/bta:281094%09red/bta:280832%09red/bta:326285%09red/bta:534227%09red/bta:286…
Glyoxylate and dicarboxylate metabolism	KEGG PATHWAY	bta00630	4	25	0.272028	0.98988	101112791|443091|101111913|101117702	http://www.genome.jp/kegg-bin/show_pathway?bta00630/bta:512995%09red/bta:507949%09red/bta:281306%09red/bta:508170%09red
Amphetamine addiction	KEGG PATHWAY	bta05031	9	69	0.283534	1	101118410|101106401|101113882|443218|101104796|101112976|443274|101106659|100216465	http://www.genome.jp/kegg-bin/show_pathway?bta05031/bta:101909126%09red/bta:338445%09red/bta:281293%09red/bta:509107%09red/bta:282471%09red/bta:282325%09red/bta:280795%09red/bta:534129%09red/bta:513105%09red
Prostate cancer	KEGG PATHWAY	bta05215	11	87	0.284353	1	101119602|780521|101113882|101106508|100144763|101112976|100294652|100820756|100216465|100302083|101106012	http://www.genome.jp/kegg-bin/show_pathway?bta05215/bta:534129%09red/bta:527024%09red/bta:513497%09red/bta:524530%09red/bta:540388%09red/bta:281020%09red/bta:535399%09red/bta:280991%09red/bta:509107%09red/bta:513105%09red/bta:282301%09red
Alanine, aspartate and glutamate metabolism	KEGG PATHWAY	bta00250	5	35	0.302021	1	114108602|101120570|443093|101107828|101109822	http://www.genome.jp/kegg-bin/show_pathway?bta00250/bta:530101%09red/bta:281785%09red/bta:618400%09red/bta:532724%09red/bta:286886%09red
Thyroid hormone synthesis	KEGG PATHWAY	bta04918	9	71	0.309234	1	101118410|101116157|101112976|101118148|101108200|101113882|100216465|101108203|101103585	http://www.genome.jp/kegg-bin/show_pathway?bta04918/bta:100337021%09red/bta:287026%09red/bta:515161%09red/bta:509107%09red/bta:535603%09red/bta:282325%09red/bta:509121%09red/bta:534129%09red/bta:513105%09red
Leishmaniasis	KEGG PATHWAY	bta05140	9	72	0.322276	1	101118410|101113211|101108696|443218|554323|101109747|101106452|101119342|101108131	http://www.genome.jp/kegg-bin/show_pathway?bta05140/bta:281111%09red/bta:101903005%09red/bta:280677%09red/bta:524810%09red/bta:538957%09red/bta:506214%09red/bta:280795%09red/bta:100848815%09red/bta:282325%09red
Synthesis and degradation of ketone bodies	KEGG PATHWAY	bta00072	2	11	0.33696	1	101104112|101122979	http://www.genome.jp/kegg-bin/show_pathway?bta00072/bta:534090%09red/bta:407767%09red
Glioma	KEGG PATHWAY	bta05214	8	64	0.337489	1	101118410|101106012|101106508|114113021|100144763|100294652|101113847|100302083	http://www.genome.jp/kegg-bin/show_pathway?bta05214/bta:533455%09red/bta:616369%09red/bta:513497%09red/bta:524530%09red/bta:540388%09red/bta:280991%09red/bta:282325%09red/bta:282301%09red
Non-small cell lung cancer	KEGG PATHWAY	bta05223	7	55	0.339069	1	101118410|101106508|114113021|100144763|101111845|100294652|101115950	http://www.genome.jp/kegg-bin/show_pathway?bta05223/bta:540187%09red/bta:509500%09red/bta:524530%09red/bta:540388%09red/bta:280991%09red/bta:282325%09red/bta:616369%09red
Drug metabolism - other enzymes	KEGG PATHWAY	bta00983	5	37	0.339242	1	101109311|101116336|101116756|101123418|442993	http://www.genome.jp/kegg-bin/show_pathway?bta00983/bta:511644%09red/bta:286792%09red/bta:512098%09red/bta:508916%09red/bta:281124%09red
Synaptic vesicle cycle	KEGG PATHWAY	bta04721	8	65	0.351666	1	101108589|101104796|101123470|101117677|101102712|101108737|101107797|101108509	http://www.genome.jp/kegg-bin/show_pathway?bta04721/bta:282148%09red/bta:508794%09red/bta:534114%09red/bta:511839%09red/bta:282471%09red/bta:540853%09red/bta:100337128%09red/bta:281511%09red
Insulin secretion	KEGG PATHWAY	bta04911	10	84	0.358024	1	101118410|101113882|101108589|443231|443179|101112976|101118148|100216465|101108203|101103585	http://www.genome.jp/kegg-bin/show_pathway?bta04911/bta:287026%09red/bta:515161%09red/bta:509107%09red/bta:540853%09red/bta:535603%09red/bta:280802%09red/bta:534129%09red/bta:319095%09red/bta:513105%09red/bta:282325%09red
Colorectal cancer	KEGG PATHWAY	bta05210	8	66	0.365912	1	101119602|780521|443218|554323|100144763|106990092|100294652|106990363	http://www.genome.jp/kegg-bin/show_pathway?bta05210/bta:100850794%09red/bta:524530%09red/bta:281020%09red/bta:535399%09red/bta:280991%09red/bta:538957%09red/bta:280795%09red
Hematopoietic cell lineage	KEGG PATHWAY	bta04640	11	94	0.366032	1	101113991|101113211|101123372|443017|101104200|780504|101115115|101105675|443140|101109969|101102230	http://www.genome.jp/kegg-bin/show_pathway?bta04640/bta:407106%09red/bta:281052%09red/bta:281051%09red/bta:509418%09red/bta:407126%09red/bta:524810%09red/bta:281873%09red/bta:281094%09red/bta:280832%09red/bta:100299249%09red
Riboflavin metabolism	KEGG PATHWAY	bta00740	2	12	0.371394	1	101119750|101123048	http://www.genome.jp/kegg-bin/show_pathway?bta00740/bta:615535%09red/bta:281650%09red
Phenylalanine metabolism	KEGG PATHWAY	bta00360	3	21	0.378952	1	101106401|443093|101106659	http://www.genome.jp/kegg-bin/show_pathway?bta00360/bta:281293%09red/bta:338445%09red/bta:286886%09red
Glutamatergic synapse	KEGG PATHWAY	bta04724	13	115	0.390071	1	101118410|101119495|101117805|101119297|101108742|443274|101122701|443514|443247|101114065|101118063|101108203|101103585	http://www.genome.jp/kegg-bin/show_pathway?bta04724/bta:538360%09red/bta:101909126%09red/bta:282353%09red/bta:618649%09red/bta:532553%09red/bta:287026%09red/bta:541119%09red/bta:512428%09red/bta:281792%09red/bta:535603%09red/bta:523673%09red/bta:615226%09red/bta:282325%09red
Proximal tubule bicarbonate reclamation	KEGG PATHWAY	bta04964	3	22	0.40458	1	114108602|494437|101118148	http://www.genome.jp/kegg-bin/show_pathway?bta04964/bta:407112%09red/bta:281785%09red/bta:515161%09red
Pathways in cancer	KEGG PATHWAY	bta05200	35	329	0.405828	1	101106012|101111396|101123374|101113128|101121444|100294652|100302083|101119637|101112706|114113021|114110852|554323|101109969|106990092|101118410|101111043|101109353|101114404|100144763|101111845|101123346|100216328|101121501|101119602|780521|780504|443218|101105588|780460|101106520|101106508|106990363|101119408|101116782|443074	http://www.genome.jp/kegg-bin/show_pathway?bta05200/bta:100850794%09red/bta:513497%09red/bta:520030%09red/bta:533929%09red/bta:780777%09red/bta:525906%09red/bta:282325%09red/bta:280795%09red/bta:282301%09red/bta:511602%09red/bta:532572%09red/bta:540830%09red/bta:522467%09red/bta:509418%09red/bta:538957%09red/bta:785371%09red/bta:511043%09red/bta:615866%09red/bta:445420%09red/bta:616369%09red/bta:…
Serotonergic synapse	KEGG PATHWAY	bta04726	13	117	0.412054	1	101109786|100568286|101106121|101119495|101106659|101106401|100913155|101104796|114114084|101114783|101112384|101103585|101118410	http://www.genome.jp/kegg-bin/show_pathway?bta04726/bta:287026%09red/bta:338445%09red/bta:535383%09red/bta:282471%09red/bta:281293%09red/bta:100847677%09red/bta:282211%09red/bta:281792%09red/bta:282325%09red/bta:540657%09red/bta:616356%09red
Bile secretion	KEGG PATHWAY	bta04976	8	70	0.423186	1	494437|101106409|443184|101105401|101118148|101120653|101108203|443535	http://www.genome.jp/kegg-bin/show_pathway?bta04976/bta:407112%09red/bta:281276%09red/bta:540528%09red/bta:516762%09red/bta:404160%09red/bta:535603%09red/bta:515161%09red/bta:530653%09red
Cocaine addiction	KEGG PATHWAY	bta05030	6	51	0.424051	1	101106401|101113882|101104796|101112976|101106659|100216465	http://www.genome.jp/kegg-bin/show_pathway?bta05030/bta:338445%09red/bta:281293%09red/bta:509107%09red/bta:282471%09red/bta:534129%09red/bta:513105%09red
Wnt signaling pathway	KEGG PATHWAY	bta04310	15	138	0.430229	1	101109845|780521|101123636|100192317|101116876|100147799|100144763|101123374|101123633|101114123|114118764|101116782|100302355|101103585|101118410	http://www.genome.jp/kegg-bin/show_pathway?bta04310/bta:287026%09red/bta:513742%09red/bta:445420%09red/bta:286794%09red/bta:282069%09red/bta:524530%09red/bta:541161%09red/bta:510821%09red/bta:522467%09red/bta:504445%09red/bta:282880%09red/bta:789390%09red/bta:535399%09red/bta:615414%09red/bta:282325%09red
Melanoma	KEGG PATHWAY	bta05218	8	71	0.437481	1	101106012|101109353|114113021|780460|100144763|100294652|100302083|443074	http://www.genome.jp/kegg-bin/show_pathway?bta05218/bta:616369%09red/bta:513497%09red/bta:524530%09red/bta:533929%09red/bta:281160%09red/bta:280991%09red/bta:282301%09red/bta:326285%09red
Sulfur metabolism	KEGG PATHWAY	bta00920	2	14	0.437874	1	106990092|106990363	http://www.genome.jp/kegg-bin/show_pathway?bta00920/bta:100850794%09red
Phenylalanine, tyrosine and tryptophan biosynthesis	KEGG PATHWAY	bta00400	1	5	0.437937	1	443093	http://www.genome.jp/kegg-bin/show_pathway?bta00400/bta:286886%09red
Butirosin and neomycin biosynthesis	KEGG PATHWAY	bta00524	1	5	0.437937	1	101107690	http://www.genome.jp/kegg-bin/show_pathway?bta00524/bta:788926%09red
Phosphatidylinositol signaling system	KEGG PATHWAY	bta04070	9	81	0.442398	1	101123108|101102720|101111344|101108766|101114659|101110414|101105703|101103585|101118410	http://www.genome.jp/kegg-bin/show_pathway?bta04070/bta:537396%09red/bta:513301%09red/bta:518523%09red/bta:287026%09red/bta:519037%09red/bta:537171%09red/bta:614834%09red/bta:282325%09red/bta:540771%09red
Calcium signaling pathway	KEGG PATHWAY	bta04020	20	188	0.443333	1	101118410|443366|101113211|101106906|101111344|100147788|443425|101120753|101121717|101114623|101121046|101103889|101118381|100145866|101105703|101121067|101108203|101106012|101103585|101121604	http://www.genome.jp/kegg-bin/show_pathway?bta04020/bta:535603%09red/bta:540387%09red/bta:282301%09red/bta:541008%09red/bta:281549%09red/bta:281231%09red/bta:785655%09red/bta:287026%09red/bta:519037%09red/bta:524810%09red/bta:281665%09red/bta:613800%09red/bta:540771%09red/bta:282325%09red/bta:404136%09red/bta:282479%09red/bta:282020%09red/bta:540307%09red/bta:281789%09red/bta:282119%09red
cAMP signaling pathway	KEGG PATHWAY	bta04024	21	199	0.453972	1	101119637|101109786|101114783|101113882|101111396|443218|101110137|443231|101109816|100233164|101112976|100294652|100500781|101118148|443361|443274|101105703|101108203|101103280|100233165|101121046	http://www.genome.jp/kegg-bin/show_pathway?bta04024/bta:515718%09red/bta:101909126%09red/bta:535383%09red/bta:790124%09red/bta:540830%09red/bta:616356%09red/bta:282133%09red/bta:535603%09red/bta:515161%09red/bta:519037%09red/bta:536517%09red/bta:613800%09red/bta:280991%09red/bta:519225%09red/bta:504813%09red/bta:281701%09red/bta:785371%09red/bta:280795%09red/bta:534129%09red/bta:319095%09red/bta:…
Ovarian steroidogenesis	KEGG PATHWAY	bta04913	6	53	0.457452	1	114108656|100913161|101119706|443122|101108203|443535	http://www.genome.jp/kegg-bin/show_pathway?bta04913/bta:281276%09red/bta:100337056%09red/bta:511470%09red/bta:515710%09red/bta:535603%09red/bta:281507%09red
Hippo signaling pathway	KEGG PATHWAY	bta04390	16	151	0.462889	1	780521|101113409|443175|101109353|101107231|554323|100144763|101123374|101123346|101116782|101117418|780452|100147799|101121501|101122295|443229	http://www.genome.jp/kegg-bin/show_pathway?bta04390/bta:507682%09red/bta:509290%09red/bta:287022%09red/bta:286877%09red/bta:445420%09red/bta:522467%09red/bta:524530%09red/bta:526848%09red/bta:281160%09red/bta:780777%09red/bta:540488%09red/bta:538957%09red/bta:520730%09red/bta:540595%09red/bta:535399%09red/bta:615414%09red
Chronic myeloid leukemia	KEGG PATHWAY	bta05220	8	73	0.465918	1	101111043|101114404|554323|114113021|100144763|100294652|101113847|100302083	http://www.genome.jp/kegg-bin/show_pathway?bta05220/bta:615866%09red/bta:533455%09red/bta:616369%09red/bta:513497%09red/bta:524530%09red/bta:525906%09red/bta:538957%09red/bta:280991%09red
Tight junction	KEGG PATHWAY	bta04530	14	132	0.469111	1	101118410|101113409|101111932|101122295|101123346|101110290|101102362|100294652|101113649|101122194|101106811|101121501|101112608|101114409	http://www.genome.jp/kegg-bin/show_pathway?bta04530/bta:282325%09red/bta:509290%09red/bta:286877%09red/bta:526674%09red/bta:540803%09red/bta:526848%09red/bta:780777%09red/bta:508268%09red/bta:280991%09red/bta:530050%09red/bta:282030%09red/bta:538761%09red/bta:524770%09red/bta:513034%09red
Salivary secretion	KEGG PATHWAY	bta04970	9	84	0.4823	1	105601930|101118410|100137068|443010|443424|101118148|101108203|101103585|101121046	http://www.genome.jp/kegg-bin/show_pathway?bta04970/bta:282004%09red/bta:287026%09red/bta:282167%09red/bta:613800%09red/bta:515161%09red/bta:404104%09red/bta:535603%09red/bta:282325%09red/bta:614878%09red
Tuberculosis	KEGG PATHWAY	bta05152	19	183	0.486113	1	101119602|101108131|101113211|101108509|101102057|101108696|101107508|554323|443206|443424|106990092|100294652|106990363|101112054|101109747|101119342|100192432|101117677|101111081	http://www.genome.jp/kegg-bin/show_pathway?bta05152/bta:100850794%09red/bta:282148%09red/bta:282167%09red/bta:513266%09red/bta:281249%09red/bta:508832%09red/bta:101903005%09red/bta:506214%09red/bta:281020%09red/bta:280677%09red/bta:511839%09red/bta:524810%09red/bta:280991%09red/bta:317777%09red/bta:538957%09red/bta:100848815%09red/bta:282229%09red/bta:517535%09red
Amyotrophic lateral sclerosis (ALS)	KEGG PATHWAY	bta05014	6	55	0.490361	1	101119602|106990092|101107472|443247|101111570|106990363	http://www.genome.jp/kegg-bin/show_pathway?bta05014/bta:100850794%09red/bta:541119%09red/bta:510219%09red/bta:528842%09red/bta:281020%09red
ErbB signaling pathway	KEGG PATHWAY	bta04012	9	85	0.495459	1	101118410|101106508|101111043|101114404|101112537|100294652|101113847|101103889|100302083	http://www.genome.jp/kegg-bin/show_pathway?bta04012/bta:615866%09red/bta:533455%09red/bta:513497%09red/bta:785655%09red/bta:540388%09red/bta:539977%09red/bta:525906%09red/bta:282325%09red/bta:280991%09red
Glycosphingolipid biosynthesis - ganglio series	KEGG PATHWAY	bta00604	2	16	0.500322	1	101108622|101117321	http://www.genome.jp/kegg-bin/show_pathway?bta00604/bta:282352%09red/bta:540995%09red
Asthma	KEGG PATHWAY	bta05310	4	37	0.524553	1	101119342|101113211|101108696|101109747	http://www.genome.jp/kegg-bin/show_pathway?bta05310/bta:524810%09red/bta:100848815%09red/bta:506214%09red/bta:101903005%09red
Primary bile acid biosynthesis	KEGG PATHWAY	bta00120	2	17	0.529826	1	101106409|101103641	http://www.genome.jp/kegg-bin/show_pathway?bta00120/bta:513855%09red/bta:530653%09red
Mineral absorption	KEGG PATHWAY	bta04978	5	48	0.540731	1	443451|101120910|100137068|494437|101118148	http://www.genome.jp/kegg-bin/show_pathway?bta04978/bta:407112%09red/bta:613998%09red/bta:614878%09red/bta:515161%09red/bta:513221%09red
Sphingolipid metabolism	KEGG PATHWAY	bta00600	5	48	0.540731	1	101113069|101121732|101114836|101102559|101112599	http://www.genome.jp/kegg-bin/show_pathway?bta00600/bta:513295%09red/bta:524460%09red/bta:505233%09red/bta:281566%09red/bta:100336736%09red
Starch and sucrose metabolism	KEGG PATHWAY	bta00500	5	48	0.540731	1	101118685|442993|442998|101123048|101107690	http://www.genome.jp/kegg-bin/show_pathway?bta00500/bta:615535%09red/bta:788926%09red/bta:327664%09red/bta:537451%09red/bta:286792%09red
Bladder cancer	KEGG PATHWAY	bta05219	4	38	0.54406	1	101106433|100302083|100144763|114113021	http://www.genome.jp/kegg-bin/show_pathway?bta05219/bta:281530%09red/bta:616369%09red/bta:513497%09red/bta:524530%09red
HTLV-I infection	KEGG PATHWAY	bta05166	27	270	0.544953	1	101106012|105609515|101114226|101123374|101105532|101116782|101119342|101110290|100302083|443045|114113021|554323|101113636|100147788|101109224|100126866|100144763|641296|100216465|101109367|101108696|443218|101109747|100147799|100145866|100294652|101108203	http://www.genome.jp/kegg-bin/show_pathway?bta05166/bta:782667%09red/bta:518897%09red/bta:513497%09red/bta:509107%09red/bta:506214%09red/bta:280795%09red/bta:100848815%09red/bta:282301%09red/bta:505691%09red/bta:101903005%09red/bta:282119%09red/bta:282118%09red/bta:522467%09red/bta:538957%09red/bta:281839%09red/bta:281874%09red/bta:615414%09red/bta:518884%09red/bta:445420%09red/bta:281036%09red/b…
Hypertrophic cardiomyopathy (HCM)	KEGG PATHWAY	bta05410	8	79	0.548847	1	101104483|105613829|554323|100127210|101105162|101117308|443140|101119919	http://www.genome.jp/kegg-bin/show_pathway?bta05410/bta:100295485%09red/bta:504219%09red/bta:538954%09red/bta:523755%09red/bta:538957%09red/bta:280765%09red/bta:281873%09red/bta:506995%09red
TNF signaling pathway	KEGG PATHWAY	bta04668	11	110	0.555771	1	101113882|443218|443045|101104200|101114226|101113636|101110180|100294652|101119408|100216465|101112976	http://www.genome.jp/kegg-bin/show_pathway?bta04668/bta:280840%09red/bta:534578%09red/bta:282118%09red/bta:509107%09red/bta:534129%09red/bta:280991%09red/bta:507234%09red/bta:280795%09red/bta:281094%09red/bta:281839%09red/bta:513105%09red
Estrogen signaling pathway	KEGG PATHWAY	bta04915	10	100	0.557533	1	101119495|101113882|443218|101112844|101112976|100294652|101113847|100216465|101108203|101103585	http://www.genome.jp/kegg-bin/show_pathway?bta04915/bta:287026%09red/bta:533455%09red/bta:509107%09red/bta:281792%09red/bta:535603%09red/bta:280991%09red/bta:281831%09red/bta:280795%09red/bta:534129%09red/bta:513105%09red
Selenocompound metabolism	KEGG PATHWAY	bta00450	2	18	0.558118	1	101123289|XLOC_041294	http://www.genome.jp/kegg-bin/show_pathway?bta00450/bta:527922%09red
Melanogenesis	KEGG PATHWAY	bta04916	10	101	0.569355	1	101118410|780521|101119495|101113882|780504|101123374|101116782|101108203|100034666|101103585	http://www.genome.jp/kegg-bin/show_pathway?bta04916/bta:287026%09red/bta:445420%09red/bta:282105%09red/bta:535399%09red/bta:281792%09red/bta:535603%09red/bta:282325%09red/bta:522467%09red/bta:280832%09red/bta:513105%09red
Neuroactive ligand-receptor interaction	KEGG PATHWAY	bta04080	29	295	0.579423	1	101109816|443274|101117759|101122701|101121604|101118381|443264|443025|100913155|101107224|443366|443361|101114407|101106846|101123239|101108742|101121717|101114623|100500781|100500782|101102228|100170317|101114783|443231|101113565|101111138|101123499|101114065|443425	http://www.genome.jp/kegg-bin/show_pathway?bta04080/bta:538360%09red/bta:532829%09red/bta:281716%09red/bta:281665%09red/bta:319095%09red/bta:521831%09red/bta:781872%09red/bta:497205%09red/bta:532553%09red/bta:282135%09red/bta:282702%09red/bta:532277%09red/bta:281549%09red/bta:281231%09red/bta:281963%09red/bta:282181%09red/bta:504813%09red/bta:404136%09red/bta:282237%09red/bta:540657%09red/bta:282…
HIF-1 signaling pathway	KEGG PATHWAY	bta04066	10	102	0.581043	1	101119602|101110118|101107621|101107690|497271|101122519|100294652|101107460|100302083|101118410	http://www.genome.jp/kegg-bin/show_pathway?bta04066/bta:617915%09red/bta:407109%09red/bta:788926%09red/bta:513497%09red/bta:281020%09red/bta:538519%09red/bta:280991%09red/bta:282325%09red/bta:282140%09red/bta:407183%09red
Pantothenate and CoA biosynthesis	KEGG PATHWAY	bta00770	2	19	0.585172	1	101109311|101123048	http://www.genome.jp/kegg-bin/show_pathway?bta00770/bta:615535%09red/bta:281124%09red
Endometrial cancer	KEGG PATHWAY	bta05213	5	51	0.59094	1	101123346|780521|101121501|100294652|100144763	http://www.genome.jp/kegg-bin/show_pathway?bta05213/bta:780777%09red/bta:280991%09red/bta:524530%09red/bta:526848%09red/bta:535399%09red
Hedgehog signaling pathway	KEGG PATHWAY	bta04340	5	51	0.59094	1	101119637|101108200|101116782|101111396|101123374	http://www.genome.jp/kegg-bin/show_pathway?bta04340/bta:445420%09red/bta:100337021%09red/bta:522467%09red/bta:785371%09red/bta:540830%09red
Thyroid cancer	KEGG PATHWAY	bta05216	3	30	0.592591	1	780521|100144763|101111845	http://www.genome.jp/kegg-bin/show_pathway?bta05216/bta:509500%09red/bta:524530%09red/bta:535399%09red
Morphine addiction	KEGG PATHWAY	bta05032	9	93	0.596458	1	101118410|101119495|101105363|100913155|101113565|101109816|101117759|101107286|101108203	http://www.genome.jp/kegg-bin/show_pathway?bta05032/bta:780973%09red/bta:282133%09red/bta:506787%09red/bta:100337124%09red/bta:281792%09red/bta:535603%09red/bta:282325%09red/bta:282237%09red/bta:540657%09red
Nicotine addiction	KEGG PATHWAY	bta05033	4	41	0.59995	1	100913155|443274|101117759|101113565	http://www.genome.jp/kegg-bin/show_pathway?bta05033/bta:282237%09red/bta:101909126%09red/bta:540657%09red/bta:780973%09red
Renin-angiotensin system	KEGG PATHWAY	bta04614	2	20	0.610979	1	105613829|101117763	http://www.genome.jp/kegg-bin/show_pathway?bta04614/bta:100295485%09red/bta:504350%09red
Terpenoid backbone biosynthesis	KEGG PATHWAY	bta00900	2	20	0.610979	1	101113026|101122979	http://www.genome.jp/kegg-bin/show_pathway?bta00900/bta:513533%09red/bta:407767%09red
Mucin type O-Glycan biosynthesis	KEGG PATHWAY	bta00512	3	31	0.613255	1	101117195|101109586|101113458	http://www.genome.jp/kegg-bin/show_pathway?bta00512/bta:505622%09red/bta:618078%09red
Circadian rhythm	KEGG PATHWAY	bta04710	3	31	0.613255	1	101104483|101112806|100127210	http://www.genome.jp/kegg-bin/show_pathway?bta04710/bta:504219%09red/bta:613907%09red/bta:538954%09red
cGMP-PKG signaling pathway	KEGG PATHWAY	bta04022	16	167	0.614364	1	101108203|101113882|101112976|443163|101121655|101109816|101120753|443010|100294652|101121046|101118148|100145866|100216465|100170317|101103585|100147788	http://www.genome.jp/kegg-bin/show_pathway?bta04022/bta:535603%09red/bta:282004%09red/bta:532330%09red/bta:282133%09red/bta:282135%09red/bta:287026%09red/bta:515161%09red/bta:509107%09red/bta:613800%09red/bta:280991%09red/bta:100848920%09red/bta:282479%09red/bta:534129%09red/bta:540307%09red/bta:513105%09red/bta:282119%09red
ABC transporters	KEGG PATHWAY	bta02010	4	42	0.617636	1	101115808|101104887|101118659|101107561	http://www.genome.jp/kegg-bin/show_pathway?bta02010/bta:523479%09red/bta:526059%09red/bta:504278%09red/bta:281584%09red
Antigen processing and presentation	KEGG PATHWAY	bta04612	7	74	0.61999	1	101108696|780470|105609515|101112844|101109747|101119342|678680	http://www.genome.jp/kegg-bin/show_pathway?bta04612/bta:281281%09red/bta:101903005%09red/bta:281036%09red/bta:281831%09red/bta:506214%09red/bta:100848815%09red/bta:281105%09red
Cell cycle	KEGG PATHWAY	bta04110	12	127	0.627678	1	114113021|100216434|554323|100147799|100144763|101105532|101110906|780452|101109224|101121483|101120694|100302083	http://www.genome.jp/kegg-bin/show_pathway?bta04110/bta:518897%09red/bta:505691%09red/bta:287022%09red/bta:616369%09red/bta:513497%09red/bta:524530%09red/bta:614777%09red/bta:327679%09red/bta:538957%09red/bta:520428%09red/bta:615414%09red/bta:510972%09red
Bacterial invasion of epithelial cells	KEGG PATHWAY	bta05100	7	75	0.633053	1	101111043|101108737|101114404|101123346|101113847|443140|101121501	http://www.genome.jp/kegg-bin/show_pathway?bta05100/bta:615866%09red/bta:533455%09red/bta:508794%09red/bta:526848%09red/bta:780777%09red/bta:525906%09red/bta:281873%09red
beta-Alanine metabolism	KEGG PATHWAY	bta00410	3	32	0.6332	1	101109311|101122299|100192316	http://www.genome.jp/kegg-bin/show_pathway?bta00410/bta:281124%09red/bta:512341%09red/bta:281810%09red
Steroid biosynthesis	KEGG PATHWAY	bta00100	2	21	0.635539	1	101113583|101123162	http://www.genome.jp/kegg-bin/show_pathway?bta00100/bta:505060%09red/bta:533726%09red
Fc gamma R-mediated phagocytosis	KEGG PATHWAY	bta04666	8	86	0.638147	1	101118410|101113211|101110137|101122270|100294652|100579169|100192432|101102555	http://www.genome.jp/kegg-bin/show_pathway?bta04666/bta:515718%09red/bta:535077%09red/bta:618009%09red/bta:614722%09red/bta:524810%09red/bta:280991%09red/bta:282325%09red/bta:282229%09red
Hepatitis B	KEGG PATHWAY	bta05161	14	149	0.638893	1	101119602|101118410|101106906|101113882|443218|554323|100144763|101112976|106990092|100294652|780452|100216465|100302083|106990363	http://www.genome.jp/kegg-bin/show_pathway?bta05161/bta:100850794%09red/bta:541008%09red/bta:287022%09red/bta:513497%09red/bta:524530%09red/bta:281020%09red/bta:509107%09red/bta:280991%09red/bta:282325%09red/bta:538957%09red/bta:280795%09red/bta:534129%09red/bta:513105%09red
Endocrine and other factor-regulated calcium reabsorption	KEGG PATHWAY	bta04961	4	44	0.6515	1	101118410|101108737|101118148|101103585	http://www.genome.jp/kegg-bin/show_pathway?bta04961/bta:508794%09red/bta:287026%09red/bta:282325%09red/bta:515161%09red
Taurine and hypotaurine metabolism	KEGG PATHWAY	bta00430	1	10	0.652281	1	101106409	http://www.genome.jp/kegg-bin/show_pathway?bta00430/bta:530653%09red
Prion diseases	KEGG PATHWAY	bta05020	3	33	0.652417	1	101105588|101102522|101105026	http://www.genome.jp/kegg-bin/show_pathway?bta05020/bta:513217%09red/bta:532572%09red/bta:526766%09red
Vitamin digestion and absorption	KEGG PATHWAY	bta04977	2	22	0.658866	1	101117785|101121241	http://www.genome.jp/kegg-bin/show_pathway?bta04977/bta:521298%09red/bta:281631%09red
Basal cell carcinoma	KEGG PATHWAY	bta05217	5	56	0.66738	1	101119637|780521|101116782|101111396|101123374	http://www.genome.jp/kegg-bin/show_pathway?bta05217/bta:445420%09red/bta:522467%09red/bta:540830%09red/bta:785371%09red/bta:535399%09red
Acute myeloid leukemia	KEGG PATHWAY	bta05221	5	56	0.66738	1	114110852|780521|780504|100294652|100144763	http://www.genome.jp/kegg-bin/show_pathway?bta05221/bta:445543%09red/bta:524530%09red/bta:280832%09red/bta:280991%09red/bta:535399%09red
Vasopressin-regulated water reabsorption	KEGG PATHWAY	bta04962	4	45	0.667661	1	101121274|101108203|101113882|101112976	http://www.genome.jp/kegg-bin/show_pathway?bta04962/bta:534129%09red/bta:540369%09red/bta:535603%09red/bta:513105%09red
Proteasome	KEGG PATHWAY	bta03050	4	45	0.667661	1	101121959|101110188|101108368|101117608	http://www.genome.jp/kegg-bin/show_pathway?bta03050/bta:510029%09red/bta:505050%09red/bta:535683%09red/bta:516919%09red
Protein export	KEGG PATHWAY	bta03060	2	23	0.680977	1	101104068|101118280	http://www.genome.jp/kegg-bin/show_pathway?bta03060/bta:541040%09red/bta:514960%09red
TGF-beta signaling pathway	KEGG PATHWAY	bta04350	7	79	0.68265	1	101107231|443175|554323|101116988|443323|101106433|443229	http://www.genome.jp/kegg-bin/show_pathway?bta04350/bta:327681%09red/bta:507682%09red/bta:281530%09red/bta:540488%09red/bta:506721%09red/bta:540595%09red/bta:538957%09red
Chagas disease (American trypanosomiasis)	KEGG PATHWAY	bta05142	10	114	0.708493	1	101119495|105613829|443218|554323|105609515|100294652|101121067|101113409|101103585|101108131	http://www.genome.jp/kegg-bin/show_pathway?bta05142/bta:287026%09red/bta:509290%09red/bta:100295485%09red/bta:281036%09red/bta:280677%09red/bta:281792%09red/bta:538957%09red/bta:280991%09red/bta:280795%09red/bta:281789%09red
Allograft rejection	KEGG PATHWAY	bta05330	4	48	0.713	1	101119342|101113211|101108696|101109747	http://www.genome.jp/kegg-bin/show_pathway?bta05330/bta:524810%09red/bta:100848815%09red/bta:506214%09red/bta:101903005%09red
Amino sugar and nucleotide sugar metabolism	KEGG PATHWAY	bta00520	4	48	0.713	1	101103393|101120570|101105711|101107690	http://www.genome.jp/kegg-bin/show_pathway?bta00520/bta:537070%09red/bta:530101%09red/bta:510978%09red/bta:788926%09red
Notch signaling pathway	KEGG PATHWAY	bta04330	4	48	0.713	1	101103554|101109123|101110361|101107196	http://www.genome.jp/kegg-bin/show_pathway?bta04330/bta:767928%09red/bta:512873%09red/bta:528508%09red/bta:505267%09red
Retrograde endocannabinoid signaling	KEGG PATHWAY	bta04723	9	104	0.716997	1	101118410|101119495|100913155|101113565|101117759|443274|101108203|101107797|101103585	http://www.genome.jp/kegg-bin/show_pathway?bta04723/bta:101909126%09red/bta:287026%09red/bta:780973%09red/bta:534114%09red/bta:281792%09red/bta:535603%09red/bta:282325%09red/bta:282237%09red/bta:540657%09red
B cell receptor signaling pathway	KEGG PATHWAY	bta04662	6	71	0.718311	1	101113211|443218|101110137|100294652|443017|101104586	http://www.genome.jp/kegg-bin/show_pathway?bta04662/bta:515718%09red/bta:524810%09red/bta:280991%09red/bta:509801%09red/bta:280795%09red/bta:407126%09red
Long-term depression	KEGG PATHWAY	bta04730	5	60	0.721347	1	443010|101118410|101119495|101103585|443025	http://www.genome.jp/kegg-bin/show_pathway?bta04730/bta:282004%09red/bta:281792%09red/bta:287026%09red/bta:282325%09red/bta:281716%09red
Autoimmune thyroid disease	KEGG PATHWAY	bta05320	5	61	0.73381	1	101119342|101113211|443040|101108696|101109747	http://www.genome.jp/kegg-bin/show_pathway?bta05320/bta:524810%09red/bta:100848815%09red/bta:281732%09red/bta:506214%09red/bta:101903005%09red
Natural killer cell mediated cytotoxicity	KEGG PATHWAY	bta04650	10	117	0.736143	1	101118410|101113211|101106906|443045|101110137|101103958|114118728|101113847|114116078|641296	http://www.genome.jp/kegg-bin/show_pathway?bta04650/bta:515718%09red/bta:541008%09red/bta:533455%09red/bta:100126815%09red/bta:524810%09red/bta:282325%09red/bta:281839%09red/bta:281874%09red/bta:508386%09red
alpha-Linolenic acid metabolism	KEGG PATHWAY	bta00592	2	26	0.74032	1	101103632|101108615	http://www.genome.jp/kegg-bin/show_pathway?bta00592/bta:504978%09red/bta:521822%09red
Inositol phosphate metabolism	KEGG PATHWAY	bta00562	5	62	0.745862	1	101123108|101105703|101111344|101103585|101108766	http://www.genome.jp/kegg-bin/show_pathway?bta00562/bta:513301%09red/bta:540771%09red/bta:537396%09red/bta:287026%09red/bta:519037%09red
Gastric acid secretion	KEGG PATHWAY	bta04971	6	74	0.752037	1	101118410|101118148|101118381|101119863|101108203|101103585	http://www.genome.jp/kegg-bin/show_pathway?bta04971/bta:287026%09red/bta:515161%09red/bta:535603%09red/bta:282325%09red/bta:281665%09red/bta:768025%09red
Cysteine and methionine metabolism	KEGG PATHWAY	bta00270	3	39	0.752444	1	443091|101118261|443093	http://www.genome.jp/kegg-bin/show_pathway?bta00270/bta:281275%09red/bta:281306%09red/bta:286886%09red
Dilated cardiomyopathy	KEGG PATHWAY	bta05414	7	86	0.75857	1	101113211|554323|101105162|101117308|443140|101108203|101119919	http://www.genome.jp/kegg-bin/show_pathway?bta05414/bta:523755%09red/bta:535603%09red/bta:538957%09red/bta:280765%09red/bta:524810%09red/bta:281873%09red/bta:506995%09red
Prolactin signaling pathway	KEGG PATHWAY	bta04917	6	75	0.762601	1	101119259|443218|100144763|100294652|101113847|100147799	http://www.genome.jp/kegg-bin/show_pathway?bta04917/bta:533455%09red/bta:524530%09red/bta:280991%09red/bta:616753%09red/bta:280795%09red/bta:615414%09red
GABAergic synapse	KEGG PATHWAY	bta04727	7	87	0.768259	1	101118410|101119495|100913155|101113565|121820619|101117759|101108203	http://www.genome.jp/kegg-bin/show_pathway?bta04727/bta:780973%09red/bta:281792%09red/bta:535603%09red/bta:282325%09red/bta:282237%09red/bta:618422%09red/bta:540657%09red
Circadian entrainment	KEGG PATHWAY	bta04713	8	99	0.77415	1	101118410|101119495|443218|443231|443010|443274|101108203|101103585	http://www.genome.jp/kegg-bin/show_pathway?bta04713/bta:282004%09red/bta:287026%09red/bta:101909126%09red/bta:281792%09red/bta:535603%09red/bta:282325%09red/bta:280795%09red/bta:319095%09red
Graft-versus-host disease	KEGG PATHWAY	bta05332	3	41	0.780168	1	101119342|101108696|101109747	http://www.genome.jp/kegg-bin/show_pathway?bta05332/bta:100848815%09red/bta:506214%09red/bta:101903005%09red
Pertussis	KEGG PATHWAY	bta05133	6	77	0.782722	1	101115321|443218|101112891|443033|443140|101108131	http://www.genome.jp/kegg-bin/show_pathway?bta05133/bta:280678%09red/bta:407213%09red/bta:280677%09red/bta:515440%09red/bta:280795%09red/bta:281873%09red
Proteoglycans in cancer	KEGG PATHWAY	bta05205	17	201	0.789592	1	101118410|101116782|101111043|101104655|101114404|101106433|100144763|101123374|100294652|101103280|101103889|101105703|100217407|443140|100302083|101110290|101123330	http://www.genome.jp/kegg-bin/show_pathway?bta05205/bta:615866%09red/bta:445420%09red/bta:613533%09red/bta:282094%09red/bta:785655%09red/bta:524530%09red/bta:540803%09red/bta:519037%09red/bta:522467%09red/bta:281530%09red/bta:280991%09red/bta:282325%09red/bta:528415%09red/bta:525906%09red/bta:281873%09red/bta:513497%09red/bta:536517%09red
Lysine degradation	KEGG PATHWAY	bta00310	4	54	0.789674	1	114113035|101115360|100192316|101115823	http://www.genome.jp/kegg-bin/show_pathway?bta00310/bta:507159%09red/bta:520638%09red/bta:534599%09red/bta:281810%09red
Collecting duct acid secretion	KEGG PATHWAY	bta04966	2	29	0.789953	1	101108509|101117677	http://www.genome.jp/kegg-bin/show_pathway?bta04966/bta:511839%09red/bta:282148%09red
Pancreatic cancer	KEGG PATHWAY	bta05212	5	66	0.79002	1	101106508|554323|100294652|100144763|114113021	http://www.genome.jp/kegg-bin/show_pathway?bta05212/bta:616369%09red/bta:524530%09red/bta:280991%09red/bta:540388%09red/bta:538957%09red
Adrenergic signaling in cardiomyocytes	KEGG PATHWAY	bta04261	12	146	0.790574	1	101109786|101119602|101108203|101113882|101117264|101112976|100294652|101121046|101118148|100216465|101113409|101103585	http://www.genome.jp/kegg-bin/show_pathway?bta04261/bta:287026%09red/bta:533788%09red/bta:509290%09red/bta:535383%09red/bta:535603%09red/bta:281020%09red/bta:509107%09red/bta:613800%09red/bta:280991%09red/bta:515161%09red/bta:534129%09red/bta:513105%09red
Carbohydrate digestion and absorption	KEGG PATHWAY	bta04973	3	42	0.793041	1	100294652|101107690|101118148	http://www.genome.jp/kegg-bin/show_pathway?bta04973/bta:788926%09red/bta:280991%09red/bta:515161%09red
Phototransduction	KEGG PATHWAY	bta04744	2	30	0.804535	1	101106563|101123241	http://www.genome.jp/kegg-bin/show_pathway?bta04744/bta:281802%09red/bta:509933%09red
Other types of O-glycan biosynthesis	KEGG PATHWAY	bta00514	2	30	0.804535	1	101103554|100913159	http://www.genome.jp/kegg-bin/show_pathway?bta00514/bta:505267%09red/bta:282073%09red
Pentose and glucuronate interconversions	KEGG PATHWAY	bta00040	2	30	0.804535	1	442993|114116835	http://www.genome.jp/kegg-bin/show_pathway?bta00040/bta:100852322%09red/bta:286792%09red
Epstein-Barr virus infection	KEGG PATHWAY	bta05169	16	193	0.807303	1	101119602|101113211|101117608|443045|101123372|101112844|101111182|101107196|101119408|101114471|100294652|780452|443017|641296|101108368|100302083	http://www.genome.jp/kegg-bin/show_pathway?bta05169/bta:281831%09red/bta:287022%09red/bta:407106%09red/bta:513497%09red/bta:535683%09red/bta:281020%09red/bta:281874%09red/bta:510029%09red/bta:767843%09red/bta:524810%09red/bta:280991%09red/bta:767928%09red/bta:507234%09red/bta:281839%09red/bta:407126%09red/bta:506087%09red
Adherens junction	KEGG PATHWAY	bta04520	5	68	0.809737	1	101123346|780521|101121501|101122194|101109895	http://www.genome.jp/kegg-bin/show_pathway?bta04520/bta:507837%09red/bta:535399%09red/bta:524770%09red/bta:526848%09red/bta:780777%09red
Intestinal immune network for IgA production	KEGG PATHWAY	bta04672	4	56	0.811267	1	101119342|101113211|101108696|101109747	http://www.genome.jp/kegg-bin/show_pathway?bta04672/bta:524810%09red/bta:100848815%09red/bta:506214%09red/bta:101903005%09red
Jak-STAT signaling pathway	KEGG PATHWAY	bta04630	13	162	0.821744	1	101119259|101121781|101111043|101123199|101114404|101112663|100144763|101113991|101110180|101112653|100294652|100147799|443264	http://www.genome.jp/kegg-bin/show_pathway?bta04630/bta:527634%09red/bta:615866%09red/bta:497205%09red/bta:528530%09red/bta:509038%09red/bta:100299249%09red/bta:616753%09red/bta:524530%09red/bta:280991%09red/bta:533061%09red/bta:525906%09red/bta:280840%09red/bta:615414%09red
Glycosphingolipid biosynthesis - globo series	KEGG PATHWAY	bta00603	1	17	0.822508	1	101117321	http://www.genome.jp/kegg-bin/show_pathway?bta00603/bta:282352%09red
Inflammatory bowel disease (IBD)	KEGG PATHWAY	bta05321	5	70	0.827949	1	101119342|554323|443206|101108696|101109747	http://www.genome.jp/kegg-bin/show_pathway?bta05321/bta:506214%09red/bta:100848815%09red/bta:538957%09red/bta:101903005%09red/bta:281249%09red
Galactose metabolism	KEGG PATHWAY	bta00052	2	32	0.831018	1	101108592|101107690	http://www.genome.jp/kegg-bin/show_pathway?bta00052/bta:788926%09red/bta:507119%09red
Oxytocin signaling pathway	KEGG PATHWAY	bta04921	12	153	0.83554	1	101118410|101104483|101119495|443218|443163|101123388|100144763|101108939|100127210|101108203|100302083|101103585	http://www.genome.jp/kegg-bin/show_pathway?bta04921/bta:287026%09red/bta:504219%09red/bta:524530%09red/bta:538479%09red/bta:281792%09red/bta:535603%09red/bta:282325%09red/bta:538954%09red/bta:280795%09red/bta:526873%09red/bta:513497%09red/bta:100848920%09red
Pancreatic secretion	KEGG PATHWAY	bta04972	7	95	0.835642	1	101118410|101123433|101103632|101121046|101118148|101108203|101103585	http://www.genome.jp/kegg-bin/show_pathway?bta04972/bta:287026%09red/bta:613800%09red/bta:510039%09red/bta:515161%09red/bta:504978%09red/bta:535603%09red/bta:282325%09red
Apoptosis	KEGG PATHWAY	bta04210	6	84	0.842987	1	101119602|101113991|101123199|106990092|100294652|106990363	http://www.genome.jp/kegg-bin/show_pathway?bta04210/bta:528530%09red/bta:100850794%09red/bta:100299249%09red/bta:280991%09red/bta:281020%09red
Arachidonic acid metabolism	KEGG PATHWAY	bta00590	5	73	0.852582	1	114117992|101103632|114108656|101116418|105614373	http://www.genome.jp/kegg-bin/show_pathway?bta00590/bta:504978%09red/bta:100337056%09red/bta:504769%09red/bta:282021%09red
mTOR signaling pathway	KEGG PATHWAY	bta04150	4	61	0.857373	1	101118410|100127210|100294652|101114114	http://www.genome.jp/kegg-bin/show_pathway?bta04150/bta:541106%09red/bta:280991%09red/bta:282325%09red/bta:538954%09red
FoxO signaling pathway	KEGG PATHWAY	bta04068	10	134	0.85898	1	101104483|101121655|101118186|554323|100147799|100144763|100294652|101120694|100127210|100302083	http://www.genome.jp/kegg-bin/show_pathway?bta04068/bta:504219%09red/bta:524530%09red/bta:520939%09red/bta:532330%09red/bta:327679%09red/bta:280991%09red/bta:538954%09red/bta:538957%09red/bta:513497%09red/bta:615414%09red
Linoleic acid metabolism	KEGG PATHWAY	bta00591	2	35	0.864694	1	101110727|101103632	http://www.genome.jp/kegg-bin/show_pathway?bta00591/bta:504978%09red/bta:282214%09red
Thyroid hormone signaling pathway	KEGG PATHWAY	bta04919	8	112	0.868666	1	101118410|101111344|100144763|101111845|100294652|101118148|101105703|101103585	http://www.genome.jp/kegg-bin/show_pathway?bta04919/bta:287026%09red/bta:509500%09red/bta:524530%09red/bta:515161%09red/bta:280991%09red/bta:519037%09red/bta:540771%09red/bta:282325%09red
Glycosaminoglycan biosynthesis - chondroitin sulfate / dermatan sulfate	KEGG PATHWAY	bta00532	1	21	0.879147	1	101103732	http://www.genome.jp/kegg-bin/show_pathway?bta00532/bta:535975%09red
Platelet activation	KEGG PATHWAY	bta04611	9	126	0.879632	1	101114407|101114569|100101231|101122295|443010|100294652|101108203|101103585|101114493	http://www.genome.jp/kegg-bin/show_pathway?bta04611/bta:282004%09red/bta:287026%09red/bta:286877%09red/bta:538590%09red/bta:531254%09red/bta:510833%09red/bta:535603%09red/bta:281963%09red/bta:280991%09red
Type I diabetes mellitus	KEGG PATHWAY	bta04940	3	51	0.882764	1	101119342|101108696|101109747	http://www.genome.jp/kegg-bin/show_pathway?bta04940/bta:100848815%09red/bta:506214%09red/bta:101903005%09red
NF-kappa B signaling pathway	KEGG PATHWAY	bta04064	6	90	0.88315	1	101119602|101113211|443045|101114226|101113636|101119408	http://www.genome.jp/kegg-bin/show_pathway?bta04064/bta:534578%09red/bta:282118%09red/bta:281020%09red/bta:524810%09red/bta:507234%09red/bta:281839%09red
Ascorbate and aldarate metabolism	KEGG PATHWAY	bta00053	1	22	0.89022	1	442993	http://www.genome.jp/kegg-bin/show_pathway?bta00053/bta:286792%09red
Ras signaling pathway	KEGG PATHWAY	bta04014	18	234	0.892586	1	101118410|101106012|780504|101109353|780460|101104200|101109393|101109969|101103632|100294652|101107460|101113847|101105703|101110290|497271|101103280|443074|101119234	http://www.genome.jp/kegg-bin/show_pathway?bta04014/bta:617915%09red/bta:512872%09red/bta:282325%09red/bta:533455%09red/bta:282301%09red/bta:540692%09red/bta:519037%09red/bta:281160%09red/bta:504978%09red/bta:280991%09red/bta:533929%09red/bta:509418%09red/bta:540803%09red/bta:282140%09red/bta:281094%09red/bta:280832%09red/bta:536517%09red/bta:326285%09red
Long-term potentiation	KEGG PATHWAY	bta04720	4	66	0.893512	1	101109786|101118410|100216465|101103585	http://www.genome.jp/kegg-bin/show_pathway?bta04720/bta:287026%09red/bta:282325%09red/bta:535383%09red/bta:509107%09red
Regulation of actin cytoskeleton	KEGG PATHWAY	bta04810	16	212	0.896116	1	101106012|101109353|101110290|101110137|780460|101105506|101122468|101122194|101105162|100579169|101109895|641296|443140|101103280|443074|101119919	http://www.genome.jp/kegg-bin/show_pathway?bta04810/bta:515718%09red/bta:535077%09red/bta:782315%09red/bta:282301%09red/bta:540803%09red/bta:533929%09red/bta:281160%09red/bta:523755%09red/bta:536517%09red/bta:507837%09red/bta:281873%09red/bta:506995%09red/bta:540092%09red/bta:281874%09red/bta:524770%09red/bta:326285%09red
Aldosterone-regulated sodium reabsorption	KEGG PATHWAY	bta04960	2	39	0.90003	1	101118410|101118148	http://www.genome.jp/kegg-bin/show_pathway?bta04960/bta:282325%09red/bta:515161%09red
Protein processing in endoplasmic reticulum	KEGG PATHWAY	bta04141	12	169	0.910334	1	101119602|101118280|101117988|105609515|101112844|101114090|101103565|101112732|105605821|101121537|100216465|105612995	http://www.genome.jp/kegg-bin/show_pathway?bta04141/bta:100336900%09red/bta:100298456%09red/bta:281036%09red/bta:281020%09red/bta:509107%09red/bta:541040%09red/bta:515999%09red/bta:613577%09red/bta:282216%09red/bta:525256%09red/bta:281831%09red/bta:514361%09red
Endocytosis	KEGG PATHWAY	bta04144	16	217	0.912951	1	101106012|780504|101111043|101114404|554323|106990245|101112844|101109969|101103889|101119649|101106563|101108737|101121199|101122295|443535|101102555	http://www.genome.jp/kegg-bin/show_pathway?bta04144/bta:281276%09red/bta:539750%09red/bta:618009%09red/bta:507572%09red/bta:286877%09red/bta:281802%09red/bta:785655%09red/bta:509418%09red/bta:281831%09red/bta:512450%09red/bta:525906%09red/bta:538957%09red/bta:282301%09red/bta:280832%09red/bta:508794%09red/bta:615866%09red
Salmonella infection	KEGG PATHWAY	bta05132	5	83	0.914395	1	101109632|443206|443218|101104655|101123330	http://www.genome.jp/kegg-bin/show_pathway?bta05132/bta:515552%09red/bta:280795%09red/bta:613533%09red/bta:528415%09red/bta:281249%09red
Maturity onset diabetes of the young	KEGG PATHWAY	bta04950	1	25	0.917717	1	100534656	http://www.genome.jp/kegg-bin/show_pathway?bta04950/bta:509200%09red
Glycosylphosphatidylinositol(GPI)-anchor biosynthesis	KEGG PATHWAY	bta00563	1	26	0.925257	1	101119000	http://www.genome.jp/kegg-bin/show_pathway?bta00563/bta:287025%09red
VEGF signaling pathway	KEGG PATHWAY	bta04370	3	58	0.926626	1	101118410|100294652|101113847	http://www.genome.jp/kegg-bin/show_pathway?bta04370/bta:280991%09red/bta:282325%09red/bta:533455%09red
Homologous recombination	KEGG PATHWAY	bta03440	1	27	0.932106	1	101110770	http://www.genome.jp/kegg-bin/show_pathway?bta03440/bta:533414%09red
Ether lipid metabolism	KEGG PATHWAY	bta00565	2	44	0.932113	1	101103632|101120890	http://www.genome.jp/kegg-bin/show_pathway?bta00565/bta:504978%09red/bta:282513%09red
Glycosphingolipid biosynthesis - lacto and neolacto series	KEGG PATHWAY	bta00601	1	28	0.938328	1	101117321	http://www.genome.jp/kegg-bin/show_pathway?bta00601/bta:282352%09red
Gap junction	KEGG PATHWAY	bta04540	5	89	0.939365	1	443010|101106012|101108203|101103585|101118410	http://www.genome.jp/kegg-bin/show_pathway?bta04540/bta:282004%09red/bta:287026%09red/bta:535603%09red/bta:282325%09red/bta:282301%09red
RNA polymerase	KEGG PATHWAY	bta03020	1	30	0.949115	1	101111182	http://www.genome.jp/kegg-bin/show_pathway?bta03020/bta:767843%09red
Type II diabetes mellitus	KEGG PATHWAY	bta04930	2	48	0.950483	1	101121655|101107690	http://www.genome.jp/kegg-bin/show_pathway?bta04930/bta:788926%09red/bta:532330%09red
Viral carcinogenesis	KEGG PATHWAY	bta05203	17	246	0.95407	1	101108509|101113882|114113021|101123174|100144763|101107196|101117692|100579169|780452|100147799|101122194|101119408|100216465|101112976|100302083|101117677|101108131	http://www.genome.jp/kegg-bin/show_pathway?bta05203/bta:282148%09red/bta:535077%09red/bta:287022%09red/bta:508148%09red/bta:616369%09red/bta:513497%09red/bta:280677%09red/bta:524530%09red/bta:509107%09red/bta:511839%09red/bta:615414%09red/bta:507234%09red/bta:513397%09red/bta:767928%09red/bta:524770%09red/bta:534129%09red/bta:513105%09red
Transcriptional misregulation in cancer	KEGG PATHWAY	bta05202	11	173	0.955393	1	101113211|101113556|101112958|114110852|101111845|101109969|100147799|101109224|101117893|100302083|443229	http://www.genome.jp/kegg-bin/show_pathway?bta05202/bta:505691%09red/bta:509500%09red/bta:513497%09red/bta:540947%09red/bta:540488%09red/bta:509418%09red/bta:445543%09red/bta:614673%09red/bta:524810%09red/bta:512259%09red/bta:615414%09red
T cell receptor signaling pathway	KEGG PATHWAY	bta04660	6	108	0.955563	1	101111043|443218|101114404|101110137|443040|100294652	http://www.genome.jp/kegg-bin/show_pathway?bta04660/bta:515718%09red/bta:615866%09red/bta:525906%09red/bta:281732%09red/bta:280991%09red/bta:280795%09red
MicroRNAs in cancer	KEGG PATHWAY	bta05206	17	247	0.955814	1	101119602|101106012|101107077|114113021|101106433|100144763|101119706|100820740|101103889|100147799|100217407|443140|101123374|100302083|443452|101118337|101118410	http://www.genome.jp/kegg-bin/show_pathway?bta05206/bta:511470%09red/bta:517232%09red/bta:540664%09red/bta:282654%09red/bta:282094%09red/bta:785655%09red/bta:524530%09red/bta:281020%09red/bta:522467%09red/bta:281530%09red/bta:282325%09red/bta:616369%09red/bta:539465%09red/bta:281873%09red/bta:513497%09red/bta:615414%09red/bta:282301%09red
Osteoclast differentiation	KEGG PATHWAY	bta04380	8	135	0.956395	1	121816180|443218|101104200|101109969|100294652|101106452|100192432|100037695	http://www.genome.jp/kegg-bin/show_pathway?bta04380/bta:281111%09red/bta:509418%09red/bta:536097%09red/bta:282229%09red/bta:523822%09red/bta:280991%09red/bta:280795%09red/bta:281094%09red
N-Glycan biosynthesis	KEGG PATHWAY	bta00510	2	50	0.957783	1	100913159|105605821	http://www.genome.jp/kegg-bin/show_pathway?bta00510/bta:100336900%09red/bta:282073%09red
Fc epsilon RI signaling pathway	KEGG PATHWAY	bta04664	3	66	0.958019	1	101110137|101113211|100294652	http://www.genome.jp/kegg-bin/show_pathway?bta04664/bta:515718%09red/bta:524810%09red/bta:280991%09red
Renal cell carcinoma	KEGG PATHWAY	bta05211	3	66	0.958019	1	101106508|554323|100294652	http://www.genome.jp/kegg-bin/show_pathway?bta05211/bta:538957%09red/bta:280991%09red/bta:540388%09red
Lysosome	KEGG PATHWAY	bta04142	7	123	0.959144	1	114110441|678680|101117677|101120623|101107107|780470|101108509	http://www.genome.jp/kegg-bin/show_pathway?bta04142/bta:286772%09red/bta:404155%09red/bta:282148%09red/bta:281281%09red/bta:511839%09red/bta:281105%09red
Cytokine-cytokine receptor interaction	KEGG PATHWAY	bta04060	16	238	0.960958	1	101121781|780504|101102850|443175|101123199|101113991|554323|443206|101104200|101109969|101102957|101110180|101112653|101106012|100037695|443264	http://www.genome.jp/kegg-bin/show_pathway?bta04060/bta:280840%09red/bta:497205%09red/bta:281249%09red/bta:528530%09red/bta:100299249%09red/bta:509038%09red/bta:509418%09red/bta:540595%09red/bta:509585%09red/bta:538957%09red/bta:523822%09red/bta:533061%09red/bta:514239%09red/bta:281094%09red/bta:280832%09red/bta:282301%09red
Base excision repair	KEGG PATHWAY	bta03410	1	33	0.961864	1	101118667	http://www.genome.jp/kegg-bin/show_pathway?bta03410/bta:444987%09red
Aminoacyl-tRNA biosynthesis	KEGG PATHWAY	bta00970	3	68	0.963608	1	101114460|101101977|101116327	http://www.genome.jp/kegg-bin/show_pathway?bta00970/bta:510933%09red/bta:408010%09red/bta:506598%09red
Measles	KEGG PATHWAY	bta05162	8	140	0.966392	1	101113211|101102057|100144763|101112844|100302546|100294652|100147799|100192432	http://www.genome.jp/kegg-bin/show_pathway?bta05162/bta:281831%09red/bta:513266%09red/bta:524530%09red/bta:540733%09red/bta:524810%09red/bta:280991%09red/bta:282229%09red/bta:615414%09red
Primary immunodeficiency	KEGG PATHWAY	bta05340	1	36	0.971419	1	101113211	http://www.genome.jp/kegg-bin/show_pathway?bta05340/bta:524810%09red
GnRH signaling pathway	KEGG PATHWAY	bta04912	4	87	0.971928	1	100216465|101108203|101103585|101106906	http://www.genome.jp/kegg-bin/show_pathway?bta04912/bta:287026%09red/bta:535603%09red/bta:541008%09red/bta:509107%09red
Progesterone-mediated oocyte maturation	KEGG PATHWAY	bta04914	4	87	0.971928	1	101120694|443444|100294652|101108203	http://www.genome.jp/kegg-bin/show_pathway?bta04914/bta:327679%09red/bta:535603%09red/bta:280991%09red/bta:100848466%09red
Pyrimidine metabolism	KEGG PATHWAY	bta00240	5	102	0.972428	1	101109311|101114471|100037674|101113423|101111182	http://www.genome.jp/kegg-bin/show_pathway?bta00240/bta:616992%09red/bta:767843%09red/bta:506087%09red/bta:507631%09red/bta:281124%09red
MAPK signaling pathway	KEGG PATHWAY	bta04010	17	259	0.972645	1	101109353|101106012|101103535|101104655|443218|780460|554323|101112844|101122519|101110290|100294652|101116015|100216465|101123330|101114374|443074|101118410	http://www.genome.jp/kegg-bin/show_pathway?bta04010/bta:282301%09red/bta:281831%09red/bta:540380%09red/bta:613533%09red/bta:540803%09red/bta:533929%09red/bta:509107%09red/bta:538519%09red/bta:505824%09red/bta:280991%09red/bta:282325%09red/bta:528415%09red/bta:538957%09red/bta:280795%09red/bta:281160%09red/bta:615432%09red/bta:326285%09red
Regulation of autophagy	KEGG PATHWAY	bta04140	1	38	0.976419	1	100127210	http://www.genome.jp/kegg-bin/show_pathway?bta04140/bta:538954%09red
Inflammatory mediator regulation of TRP channels	KEGG PATHWAY	bta04750	5	105	0.977175	1	101121717|101118410|101108203|101120341|101103585	http://www.genome.jp/kegg-bin/show_pathway?bta04750/bta:281231%09red/bta:535603%09red/bta:282325%09red/bta:287026%09red/bta:617930%09red
Chemokine signaling pathway	KEGG PATHWAY	bta04062	11	188	0.978109	1	101118410|101106906|101110137|101122295|101117556|100294652|101113847|101106563|101108203|101103585|101103280	http://www.genome.jp/kegg-bin/show_pathway?bta04062/bta:515718%09red/bta:287026%09red/bta:541008%09red/bta:533455%09red/bta:286877%09red/bta:281802%09red/bta:617258%09red/bta:535603%09red/bta:280991%09red/bta:282325%09red/bta:536517%09red
Influenza A	KEGG PATHWAY	bta05164	10	175	0.978285	1	101108696|443045|443206|101112844|106990092|100294652|101109747|100145866|101119342|106990363	http://www.genome.jp/kegg-bin/show_pathway?bta05164/bta:100850794%09red/bta:101903005%09red/bta:282119%09red/bta:281249%09red/bta:280991%09red/bta:506214%09red/bta:281831%09red/bta:100848815%09red/bta:281839%09red
Hepatitis C	KEGG PATHWAY	bta05160	7	135	0.979094	1	101102362|100294652|101113649|101106811|101113409|100302083|443535	http://www.genome.jp/kegg-bin/show_pathway?bta05160/bta:281276%09red/bta:509290%09red/bta:513497%09red/bta:508268%09red/bta:280991%09red/bta:538761%09red/bta:513034%09red
Purine metabolism	KEGG PATHWAY	bta00230	10	176	0.979363	1	101108203|101123048|101112581|101113423|101111182|101103031|101114471|101107286|102238525|101105363	http://www.genome.jp/kegg-bin/show_pathway?bta00230/bta:616992%09red/bta:102216273%09red/bta:517063%09red/bta:615535%09red/bta:506787%09red/bta:100337124%09red/bta:535603%09red/bta:518364%09red/bta:767843%09red/bta:506087%09red
Ribosome	KEGG PATHWAY	bta03010	7	136	0.980262	1	114111248|101109581|101117395|114116368|101109212|101112227|101121718	http://www.genome.jp/kegg-bin/show_pathway?bta03010/bta:326584%09red/bta:614220%09red/bta:286873%09red/bta:511051%09red/bta:617901%09red/bta:508216%09red
mRNA surveillance pathway	KEGG PATHWAY	bta03015	4	93	0.981302	1	101117264|101113409|101111800|101115117	http://www.genome.jp/kegg-bin/show_pathway?bta03015/bta:541077%09red/bta:533788%09red/bta:509290%09red/bta:282296%09red
Signaling pathways regulating pluripotency of stem cells	KEGG PATHWAY	bta04550	7	139	0.983413	1	100302636|101110875|101110180|101116782|100294652|101123374|443229	http://www.genome.jp/kegg-bin/show_pathway?bta04550/bta:445420%09red/bta:781063%09red/bta:522467%09red/bta:540488%09red/bta:280991%09red/bta:280840%09red/bta:520842%09red
Taste transduction	KEGG PATHWAY	bta04742	1	42	0.983949	1	101120341	http://www.genome.jp/kegg-bin/show_pathway?bta04742/bta:617930%09red
Cytosolic DNA-sensing pathway	KEGG PATHWAY	bta04623	2	62	0.98411	1	443206|101111182	http://www.genome.jp/kegg-bin/show_pathway?bta04623/bta:767843%09red/bta:281249%09red
Oocyte meiosis	KEGG PATHWAY	bta04114	5	113	0.986365	1	101120694|101117264|443444|780452|101108203	http://www.genome.jp/kegg-bin/show_pathway?bta04114/bta:327679%09red/bta:535603%09red/bta:533788%09red/bta:100848466%09red/bta:287022%09red
Systemic lupus erythematosus	KEGG PATHWAY	bta05322	10	185	0.987076	1	101113211|101115321|101108696|101102522|101105026|101112891|101109747|101122194|101119342|101108131	http://www.genome.jp/kegg-bin/show_pathway?bta05322/bta:280678%09red/bta:515440%09red/bta:101903005%09red/bta:526766%09red/bta:280677%09red/bta:513217%09red/bta:524810%09red/bta:506214%09red/bta:100848815%09red/bta:524770%09red
Ribosome biogenesis in eukaryotes	KEGG PATHWAY	bta03008	3	85	0.989653	1	101114766|102238525|101103564	http://www.genome.jp/kegg-bin/show_pathway?bta03008/bta:512692%09red/bta:520891%09red/bta:102216273%09red
Vascular smooth muscle contraction	KEGG PATHWAY	bta04270	5	119	0.990827	1	101118410|101103632|101108203|101114256|101103585	http://www.genome.jp/kegg-bin/show_pathway?bta04270/bta:504978%09red/bta:535603%09red/bta:281595%09red/bta:282325%09red/bta:287026%09red
Neurotrophin signaling pathway	KEGG PATHWAY	bta04722	5	124	0.993447	1	101119602|100216465|100294652|101113847|101116015	http://www.genome.jp/kegg-bin/show_pathway?bta04722/bta:505824%09red/bta:280991%09red/bta:533455%09red/bta:281020%09red/bta:509107%09red
Fanconi anemia pathway	KEGG PATHWAY	bta03460	1	52	0.993866	1	101123503	http://www.genome.jp/kegg-bin/show_pathway?bta03460/bta:515845%09red
NOD-like receptor signaling pathway	KEGG PATHWAY	bta04621	1	52	0.993866	1	443206	http://www.genome.jp/kegg-bin/show_pathway?bta04621/bta:281249%09red
RNA degradation	KEGG PATHWAY	bta03018	2	74	0.99418	1	101115117|101112054	http://www.genome.jp/kegg-bin/show_pathway?bta03018/bta:282296%09red/bta:517535%09red
Herpes simplex infection	KEGG PATHWAY	bta05168	9	193	0.99624	1	101108696|443218|106990092|101109747|101119408|101119342|101107962|106990363|101108131	http://www.genome.jp/kegg-bin/show_pathway?bta05168/bta:100850794%09red/bta:101903005%09red/bta:616156%09red/bta:280677%09red/bta:507234%09red/bta:506214%09red/bta:280795%09red/bta:100848815%09red
Ubiquitin mediated proteolysis	KEGG PATHWAY	bta04120	5	138	0.997511	1	100302546|101111043|101109925|101107962|101114404	http://www.genome.jp/kegg-bin/show_pathway?bta04120/bta:616156%09red/bta:784986%09red/bta:525906%09red/bta:615866%09red/bta:540733%09red
Toll-like receptor signaling pathway	KEGG PATHWAY	bta04620	3	106	0.997984	1	443058|100294652|443218	http://www.genome.jp/kegg-bin/show_pathway?bta04620/bta:281499%09red/bta:280991%09red/bta:280795%09red
Alcoholism	KEGG PATHWAY	bta05034	9	224	0.99944	1	101106401|101119495|101113882|101104796|101112976|101113847|101116015|101106659|100216465	http://www.genome.jp/kegg-bin/show_pathway?bta05034/bta:533455%09red/bta:338445%09red/bta:281293%09red/bta:509107%09red/bta:282471%09red/bta:281792%09red/bta:505824%09red/bta:534129%09red/bta:513105%09red
RIG-I-like receptor signaling pathway	KEGG PATHWAY	bta04622	1	77	0.999447	1	101114324	http://www.genome.jp/kegg-bin/show_pathway?bta04622/bta:519541%09red
RNA transport	KEGG PATHWAY	bta03013	4	160	0.999875	1	101114675|101109898|XLOC_102321|101115117	http://www.genome.jp/kegg-bin/show_pathway?bta03013/bta:515233%09red/bta:506194%09red/bta:512350%09red/bta:282296%09red
Spliceosome	KEGG PATHWAY	bta03040	1	130	0.999997	1	101112844	http://www.genome.jp/kegg-bin/show_pathway?bta03040/bta:281831%09red
Olfactory transduction	KEGG PATHWAY	bta04740	5	897	1	1	443010|101113975|100233164|101121706|101108203	http://www.genome.jp/kegg-bin/show_pathway?bta04740/bta:282004%09red/bta:535603%09red/bta:281701%09red/bta:530601%09red/bta:523394%09red
--------------------
#Term	Database	ID	Input number	Background number	P-Value	Corrected P-Value	Input	Hyperlink
--------------------
#Term	Database	ID	Input number	Background number	P-Value	Corrected P-Value	Input	Hyperlink
--------------------

## Sheet: HUS_vs_CSH.DEG_KEGG_pathway_enr
##Databases: KEGG PATHWAY
##Statistical test method: hypergeometric test / Fisher's exact test
##FDR correction method: Benjamini and Hochberg
#Term	Database	ID	Input number	Background number	P-Value	Corrected P-Value	Input	Hyperlink
Oxidative phosphorylation	KEGG PATHWAY	bta00190	71	143	2.08234e-23	5.49737e-21	101114007|101106179|101105616|105610140|101111395|101104057|101118985|101102659|101110095|101114221|101110664|101113599|443410|105606223|101118899|101113001|114114909|101104823|101115299|101112935|100462693|101102527|101116886|101109923|443542|100036762|101121851|101105799|101108729|101119470|101111455|101115434|101108353|101121420|101108008|101114570|101111413|101106662|101108285|101108663|10111…	http://www.genome.jp/kegg-bin/show_pathway?bta00190/bta:288380%09red/bta:281570%09red/bta:282517%09red/bta:506492%09red/bta:338057%09red/bta:327710%09red/bta:444878%09red/bta:338053%09red/bta:512500%09red/bta:100851363%09red/bta:338079%09red/bta:613925%09red/bta:287327%09red/bta:338073%09red/bta:616871%09red/bta:287027%09red/bta:287020%09red/bta:326346%09red/bta:337887%09red/bta:540176%09red/bta:…
Metabolic pathways	KEGG PATHWAY	bta01100	246	1239	2.52988e-22	3.33945e-20	101113594|101108300|101111395|101118985|101110095|101111781|101110664|101113599|101117331|101121761|100270720|101103555|101117195|105610140|102238525|101115175|101119850|101107188|100337686|101107229|101120283|101118261|101120124|443542|443450|101105869|443541|106990092|101107828|101104144|101102606|101103446|101121049|101104386|101110922|101114663|101108008|101111413|101110067|443343|101114702|1…	http://www.genome.jp/kegg-bin/show_pathway?bta01100/bta:539383%09red/bta:281570%09red/bta:280712%09red/bta:404148%09red/bta:539159%09red/bta:518974%09red/bta:281306%09red/bta:281779%09red/bta:514168%09red/bta:512112%09red/bta:280798%09red/bta:613925%09red/bta:615012%09red/bta:751790%09red/bta:100299006%09red/bta:534090%09red/bta:326346%09red/bta:281480%09red/bta:540176%09red/bta:338060%09red/bta:…
Parkinson's disease	KEGG PATHWAY	bta05012	71	154	5.65397e-22	4.97549e-20	101114007|101106179|101105616|101111395|101118985|101108778|101110095|101110664|101113599|106991715|443410|105606223|101118899|101113001|101111516|114114909|101107437|101104823|101115299|100462693|101102527|101116886|101109923|443542|100036762|101121851|106990092|101108729|101119470|101116512|100147787|101108353|101121420|101108008|101117250|101111413|101106662|101108663|101114702|101113030|10112…	http://www.genome.jp/kegg-bin/show_pathway?bta05012/bta:100850794%09red/bta:326346%09red/bta:288380%09red/bta:281570%09red/bta:282517%09red/bta:767894%09red/bta:338057%09red/bta:327710%09red/bta:338065%09red/bta:338053%09red/bta:512500%09red/bta:100851363%09red/bta:338079%09red/bta:287327%09red/bta:338073%09red/bta:616871%09red/bta:287027%09red/bta:287020%09red/bta:282578%09red/bta:337887%09red/b…
Alzheimer's disease	KEGG PATHWAY	bta05010	72	180	1.6569e-19	1.09355e-17	101114007|101106179|101105616|101111395|114110252|101118985|101108778|101110095|101110664|101113599|101112253|443410|105606223|101118899|101113001|114114909|101120656|101115299|100216464|100462693|101102527|101116886|101109923|443542|100036762|101121851|106990092|101108729|100190973|101115434|101104823|101108353|101119470|101121420|101108008|101114570|101111413|101121024|101106662|101108663|10111…	http://www.genome.jp/kegg-bin/show_pathway?bta05010/bta:100850794%09red/bta:326346%09red/bta:288380%09red/bta:281004%09red/bta:282517%09red/bta:338057%09red/bta:327710%09red/bta:444878%09red/bta:338053%09red/bta:281066%09red/bta:100851363%09red/bta:338079%09red/bta:281570%09red/bta:287327%09red/bta:338073%09red/bta:616871%09red/bta:287027%09red/bta:287020%09red/bta:512500%09red/bta:282578%09red/b…
Huntington's disease	KEGG PATHWAY	bta05016	72	194	4.47227e-18	2.36136e-16	101114007|101106179|101105616|101111395|101116743|101108778|101110095|101110664|101113599|443410|105606223|101118899|101113001|101111516|114114909|101104823|101115299|100462693|101102527|101116886|101109923|101118985|443542|100036762|101121851|106990092|101108729|101119470|101115434|101116826|100147787|101108353|101121420|101108008|101114570|101113882|101106662|101108663|101114702|101113030|10112…	http://www.genome.jp/kegg-bin/show_pathway?bta05016/bta:100850794%09red/bta:288380%09red/bta:281570%09red/bta:282517%09red/bta:512971%09red/bta:338057%09red/bta:327710%09red/bta:338065%09red/bta:338053%09red/bta:512500%09red/bta:100851363%09red/bta:338079%09red/bta:287327%09red/bta:338073%09red/bta:513105%09red/bta:616871%09red/bta:287027%09red/bta:287020%09red/bta:326346%09red/bta:337887%09red/b…
Non-alcoholic fatty liver disease (NAFLD)	KEGG PATHWAY	bta04932	59	161	7.14011e-15	3.14165e-13	101114007|101106179|101105616|101111395|101118985|101108778|101110095|101110664|101113599|101113437|101118899|101113001|114114909|100294595|101104823|100462693|101116886|101109923|101118553|101102527|100036762|101121851|106990092|101108729|101119470|101115434|101108353|101121420|101104483|101108008|101106662|101108663|101114702|101121538|101104108|100270719|101122593|101108484|101115773|100170667…	http://www.genome.jp/kegg-bin/show_pathway?bta04932/bta:100850794%09red/bta:288380%09red/bta:281570%09red/bta:338057%09red/bta:509107%09red/bta:338065%09red/bta:512500%09red/bta:100851363%09red/bta:338079%09red/bta:338073%09red/bta:616871%09red/bta:287027%09red/bta:287020%09red/bta:326346%09red/bta:281480%09red/bta:504219%09red/bta:286840%09red/bta:338060%09red/bta:327680%09red/bta:327714%09red/b…
Carbon metabolism	KEGG PATHWAY	bta01200	37	104	1.40112e-09	5.28424e-08	101120382|101105616|101112867|100189620|101106176|101117635|443085|100036762|101119850|101113555|101107229|443544|101109822|443541|101108729|101103446|101118747|100135441|101110118|101113460|114116805|101122731|101110910|443257|101104080|101117702|100216440|101105152|101111328|101103148|101115360|443093|101108532|101114126|100171395|443091|100302102	http://www.genome.jp/kegg-bin/show_pathway?bta01200/bta:509566%09red/bta:509002%09red/bta:404148%09red/bta:518852%09red/bta:281306%09red/bta:281206%09red/bta:508170%09red/bta:789572%09red/bta:514066%09red/bta:618400%09red/bta:513453%09red/bta:286840%09red/bta:505103%09red/bta:505968%09red/bta:506459%09red/bta:520260%09red/bta:614145%09red/bta:507476%09red/bta:445425%09red/bta:533910%09red/bta:286…
Valine, leucine and isoleucine degradation	KEGG PATHWAY	bta00280	24	46	3.49126e-09	1.15211e-07	101112867|101109685|101106176|101117635|101120981|101122862|101119850|101113555|101119699|101102606|101110023|101105462|101102177|114116805|101122731|101102548|101117702|101113789|101105152|443450|101113856|101108127|101113939|101110625	http://www.genome.jp/kegg-bin/show_pathway?bta00280/bta:280759%09red/bta:518852%09red/bta:531699%09red/bta:508170%09red/bta:317658%09red/bta:510440%09red/bta:282150%09red/bta:513504%09red/bta:535804%09red/bta:280969%09red/bta:281811%09red/bta:505968%09red/bta:508324%09red/bta:507477%09red/bta:533910%09red/bta:515902%09red/bta:512070%09red/bta:281643%09red/bta:511222%09red/bta:281748%09red/bta:280…
Drug metabolism - cytochrome P450	KEGG PATHWAY	bta00982	21	57	3.08178e-06	9.03988e-05	443054|114115282|114115283|101106720|101102548|101104842|101115574|101112365|101109936|100534646|101116273|442993|100534645|100534643|100141301|101104165|100037663|101103462|101104591|101108502|101107831	http://www.genome.jp/kegg-bin/show_pathway?bta00982/bta:510551%09red/bta:517828%09red/bta:615514%09red/bta:521685%09red/bta:615507%09red/bta:281167%09red/bta:615552%09red/bta:788719%09red/bta:286792%09red/bta:785216%09red/bta:493719%09red/bta:531699%09red/bta:281617%09red/bta:507346%09red/bta:777644%09red/bta:504401%09red/bta:751790%09red
Fatty acid metabolism	KEGG PATHWAY	bta01212	18	47	1.00196e-05	0.000264517	101112867|100170327|443185|101122862|101118274|101117331|114116805|101106744|101110086|101117635|101118317|101109685|101102606|101121049|101119850|101111781|101110625|443186	http://www.genome.jp/kegg-bin/show_pathway?bta01212/bta:789567%09red/bta:504301%09red/bta:281590%09red/bta:617037%09red/bta:614105%09red/bta:533333%09red/bta:281811%09red/bta:504502%09red/bta:281421%09red/bta:536628%09red/bta:281152%09red/bta:505968%09red/bta:532785%09red/bta:280924%09red/bta:511222%09red/bta:281748%09red/bta:518852%09red/bta:508324%09red
Chemical carcinogenesis	KEGG PATHWAY	bta05204	22	69	1.21482e-05	0.000291556	101110727|114115282|114115283|101115574|101111038|101116273|443409|101108502|100141301|114117992|101103462|101114663|442993|101112365|443054|101106720|100534646|100037663|100534645|100534643|105614373|101107831	http://www.genome.jp/kegg-bin/show_pathway?bta05204/bta:510551%09red/bta:535293%09red/bta:615514%09red/bta:521685%09red/bta:615507%09red/bta:493719%09red/bta:615552%09red/bta:286792%09red/bta:785216%09red/bta:281617%09red/bta:282214%09red/bta:504769%09red/bta:507346%09red/bta:777644%09red/bta:282589%09red/bta:515946%09red/bta:751790%09red
Citrate cycle (TCA cycle)	KEGG PATHWAY	bta00020	14	30	1.70538e-05	0.000375183	101110118|101103148|443091|100036762|654404|101110910|101108729|443257|101104080|101115360|101120669|101105616|100302102|101105152	http://www.genome.jp/kegg-bin/show_pathway?bta00020/bta:520260%09red/bta:282856%09red/bta:613338%09red/bta:534599%09red/bta:407109%09red/bta:281306%09red/bta:281235%09red/bta:286840%09red/bta:327696%09red/bta:533910%09red/bta:614145%09red/bta:281480%09red/bta:280976%09red/bta:511135%09red
Metabolism of xenobiotics by cytochrome P450	KEGG PATHWAY	bta00980	19	58	3.44186e-05	0.00066798	443054|101114663|114115282|114115283|101106720|442993|101115574|101111038|101112365|100037663|100534646|101116273|443409|100534645|100534643|100141301|101103462|101108502|101107831	http://www.genome.jp/kegg-bin/show_pathway?bta00980/bta:510551%09red/bta:535293%09red/bta:615514%09red/bta:521685%09red/bta:615507%09red/bta:493719%09red/bta:615552%09red/bta:286792%09red/bta:785216%09red/bta:281617%09red/bta:507346%09red/bta:777644%09red/bta:282589%09red/bta:515946%09red/bta:751790%09red
Butanoate metabolism	KEGG PATHWAY	bta00650	13	28	3.54232e-05	0.00066798	101120131|101102177|101105462|101112867|101121307|101117635|101119699|101114977|101107828|101122862|101104112|101120794|101119850	http://www.genome.jp/kegg-bin/show_pathway?bta00650/bta:100299006%09red/bta:534090%09red/bta:512227%09red/bta:532785%09red/bta:535804%09red/bta:280969%09red/bta:505842%09red/bta:532724%09red/bta:317658%09red/bta:511222%09red/bta:281748%09red/bta:533798%09red/bta:518852%09red
Propanoate metabolism	KEGG PATHWAY	bta00640	12	25	5.48888e-05	0.000966043	101105462|101113555|101122299|443186|101118261|101122731|101106176|101117635|101112867|101114126|101117702|114116805	http://www.genome.jp/kegg-bin/show_pathway?bta00640/bta:281275%09red/bta:280871%09red/bta:505968%09red/bta:518852%09red/bta:280969%09red/bta:327692%09red/bta:515902%09red/bta:506459%09red/bta:281590%09red/bta:281748%09red/bta:508170%09red/bta:512341%09red
Steroid hormone biosynthesis	KEGG PATHWAY	bta00140	18	57	8.1126e-05	0.00133858	101110727|101122543|100568286|101106772|114114084|101110086|100534646|101105400|442993|100534645|100820756|100534643|443409|114117992|101103641|101112384|105601846|105614373	http://www.genome.jp/kegg-bin/show_pathway?bta00140/bta:513855%09red/bta:533086%09red/bta:789567%09red/bta:527024%09red/bta:286792%09red/bta:282211%09red/bta:535834%09red/bta:282214%09red/bta:751790%09red/bta:531192%09red/bta:101908425%09red/bta:282589%09red/bta:504769%09red
Fatty acid degradation	KEGG PATHWAY	bta00071	15	42	0.000102641	0.00159395	114115282|114115283|101115592|101122862|101112867|114116805|101117635|101118317|101109685|101102606|101108127|101122190|101111781|101110625|101119850	http://www.genome.jp/kegg-bin/show_pathway?bta00071/bta:510551%09red/bta:504301%09red/bta:507477%09red/bta:518852%09red/bta:535174%09red/bta:504502%09red/bta:536628%09red/bta:506310%09red/bta:281811%09red/bta:505968%09red/bta:532785%09red/bta:511222%09red/bta:281748%09red/bta:508324%09red
Glycine, serine and threonine metabolism	KEGG PATHWAY	bta00260	15	43	0.000127128	0.00186454	101113594|101118487|101103446|101120382|101112853|443544|101108191|101108532|101118164|101102469|101120772|101115684|101111328|101108127|101105152	http://www.genome.jp/kegg-bin/show_pathway?bta00260/bta:534286%09red/bta:509002%09red/bta:319141%09red/bta:511791%09red/bta:507477%09red/bta:533044%09red/bta:533910%09red/bta:505103%09red/bta:404148%09red/bta:504764%09red/bta:317723%09red/bta:504453%09red/bta:539159%09red/bta:789572%09red/bta:511957%09red
Glyoxylate and dicarboxylate metabolism	KEGG PATHWAY	bta00630	11	25	0.000203868	0.00283269	101103148|101103446|443091|443544|101108191|101122731|101120772|101123646|101117702|101115175|101113555	http://www.genome.jp/kegg-bin/show_pathway?bta00630/bta:509002%09red/bta:280871%09red/bta:281306%09red/bta:317723%09red/bta:518864%09red/bta:538173%09red/bta:504764%09red/bta:508170%09red/bta:789572%09red/bta:280976%09red/bta:515902%09red
Retinol metabolism	KEGG PATHWAY	bta00830	17	57	0.000223946	0.00295608	101110727|114115282|101121875|101119050|114117992|443343|101110922|105614373|100534646|101105400|442993|100534645|100534643|101102548|114115283|100302354|101115797	http://www.genome.jp/kegg-bin/show_pathway?bta00830/bta:510551%09red/bta:526726%09red/bta:533086%09red/bta:504769%09red/bta:281360%09red/bta:286792%09red/bta:281615%09red/bta:531699%09red/bta:282214%09red/bta:751790%09red/bta:534696%09red/bta:540868%09red/bta:369021%09red
Pyruvate metabolism	KEGG PATHWAY	bta00620	13	38	0.000411196	0.00494129	101110118|443186|443091|105608759|101102520|100189620|101108191|101105152|101114126|101120669|101108127|100302102|101118261	http://www.genome.jp/kegg-bin/show_pathway?bta00620/bta:520260%09red/bta:281275%09red/bta:282856%09red/bta:540335%09red/bta:767889%09red/bta:407109%09red/bta:507477%09red/bta:281306%09red/bta:533910%09red/bta:504764%09red/bta:281590%09red/bta:540985%09red/bta:506459%09red
Cardiac muscle contraction	KEGG PATHWAY	bta04260	20	79	0.000411774	0.00494129	101110095|101102527|101116886|101108778|101108663|105609918|101110664|101121538|101113599|114110252|101121420|100270719|101122427|101119721|100170667|101113001|114114909|101117965|114115573|106991840	http://www.genome.jp/kegg-bin/show_pathway?bta04260/bta:616871%09red/bta:287012%09red/bta:287020%09red/bta:282394%09red/bta:100300550%09red/bta:286885%09red/bta:444878%09red/bta:613899%09red/bta:783202%09red/bta:286800%09red/bta:512500%09red/bta:614700%09red/bta:282393%09red/bta:100335836%09red/bta:616109%09red/bta:281570%09red/bta:100270792%09red/bta:100851363%09red
2-Oxocarboxylic acid metabolism	KEGG PATHWAY	bta01210	9	19	0.000506697	0.005816	101103148|443450|443093|101109822|101113801|101110910|443257|101104080|101118747	http://www.genome.jp/kegg-bin/show_pathway?bta01210/bta:613338%09red/bta:618400%09red/bta:281235%09red/bta:280976%09red/bta:281206%09red/bta:614145%09red/bta:281643%09red/bta:286886%09red/bta:768058%09red
Biosynthesis of amino acids	KEGG PATHWAY	bta01230	19	75	0.000563837	0.00620221	101108532|101103148|101107229|101120382|443450|443544|443093|101109822|101113801|101118487|101110910|443085|443257|101104080|100216440|101111328|101108127|100135441|101118747	http://www.genome.jp/kegg-bin/show_pathway?bta01230/bta:509566%09red/bta:509002%09red/bta:613338%09red/bta:618400%09red/bta:507476%09red/bta:507477%09red/bta:513453%09red/bta:533044%09red/bta:445425%09red/bta:281235%09red/bta:505103%09red/bta:768058%09red/bta:404148%09red/bta:281206%09red/bta:614145%09red/bta:539159%09red/bta:281643%09red/bta:286886%09red/bta:280976%09red
Glutathione metabolism	KEGG PATHWAY	bta00480	15	52	0.000687231	0.00725716	443054|101113149|101106720|100037663|101115574|101112365|443541|101116273|101114544|100820742|443257|100141301|114110822|101103462|101107831	http://www.genome.jp/kegg-bin/show_pathway?bta00480/bta:525059%09red/bta:615514%09red/bta:521685%09red/bta:286809%09red/bta:615507%09red/bta:281365%09red/bta:615552%09red/bta:281235%09red/bta:785216%09red/bta:493719%09red/bta:507346%09red/bta:777644%09red/bta:281209%09red/bta:514939%09red
Peroxisome	KEGG PATHWAY	bta04146	19	80	0.00109211	0.0110891	101117635|101118659|101120966|101122299|101119050|101107212|101111781|101106744|443257|101119699|101121271|101111594|101110625|101113900|101103446|101103521|101119009|114108774|101105648	http://www.genome.jp/kegg-bin/show_pathway?bta04146/bta:282639%09red/bta:281400%09red/bta:617037%09red/bta:518852%09red/bta:512676%09red/bta:281360%09red/bta:281235%09red/bta:282885%09red/bta:533077%09red/bta:536628%09red/bta:526059%09red/bta:617491%09red/bta:789572%09red/bta:317658%09red/bta:512902%09red/bta:512341%09red/bta:508918%09red/bta:281997%09red/bta:508324%09red
Fatty acid elongation	KEGG PATHWAY	bta00062	9	23	0.00148422	0.0145124	101106896|101118274|101117331|101109685|101110086|101108515|101112867|101122862|101121049	http://www.genome.jp/kegg-bin/show_pathway?bta00062/bta:789567%09red/bta:532785%09red/bta:614105%09red/bta:533333%09red/bta:281811%09red/bta:281421%09red/bta:539782%09red/bta:281748%09red/bta:614096%09red
Alanine, aspartate and glutamate metabolism	KEGG PATHWAY	bta00250	11	35	0.00197196	0.0185928	114108602|101105462|101120073|443093|101109822|101116643|101105895|101107828|101103446|121818379|101118747	http://www.genome.jp/kegg-bin/show_pathway?bta00250/bta:281206%09red/bta:618400%09red/bta:100126042%09red/bta:280969%09red/bta:286886%09red/bta:281785%09red/bta:281779%09red/bta:514209%09red/bta:532724%09red/bta:789572%09red
Fat digestion and absorption	KEGG PATHWAY	bta04975	12	44	0.00337511	0.0307252	101122246|443093|101120062|101110535|121817901|101108999|101114511|101110266|101117785|101117229|101110939|105605991	http://www.genome.jp/kegg-bin/show_pathway?bta04975/bta:614911%09red/bta:494318%09red/bta:280868%09red/bta:614494%09red/bta:281631%09red/bta:286886%09red/bta:327700%09red/bta:618076%09red/bta:512112%09red/bta:404129%09red
Tryptophan metabolism	KEGG PATHWAY	bta00380	12	45	0.00393474	0.0346257	XLOC_041294|101112561|101112867|101115360|100196903|101117635|101102548|101123289|101123646|101122862|101108127|101122190	http://www.genome.jp/kegg-bin/show_pathway?bta00380/bta:509751%09red/bta:527922%09red/bta:534599%09red/bta:507477%09red/bta:518852%09red/bta:506281%09red/bta:518864%09red/bta:531699%09red/bta:506310%09red/bta:532785%09red/bta:281748%09red
Porphyrin and chlorophyll metabolism	KEGG PATHWAY	bta00860	10	36	0.00644719	0.0549051	101119750|101120910|101114057|101105869|100534646|442993|100534645|100534643|101112853|101115684	http://www.genome.jp/kegg-bin/show_pathway?bta00860/bta:534286%09red/bta:286792%09red/bta:613425%09red/bta:617636%09red/bta:281650%09red/bta:511791%09red/bta:751790%09red/bta:513221%09red
Ascorbate and aldarate metabolism	KEGG PATHWAY	bta00053	7	22	0.0120391	0.0993227	442993|100534646|101114271|100534645|100534643|100171395|101108127	http://www.genome.jp/kegg-bin/show_pathway?bta00053/bta:507477%09red/bta:286792%09red/bta:280910%09red/bta:751790%09red/bta:281564%09red
Starch and sucrose metabolism	KEGG PATHWAY	bta00500	11	48	0.0142142	0.113714	101118685|101103668|442993|101121692|101120124|101118831|100534646|101114271|100534645|100534643|442998	http://www.genome.jp/kegg-bin/show_pathway?bta00500/bta:539383%09red/bta:615745%09red/bta:280798%09red/bta:286792%09red/bta:537451%09red/bta:522889%09red/bta:327664%09red/bta:751790%09red/bta:281564%09red
Glycolysis / Gluconeogenesis	KEGG PATHWAY	bta00010	13	63	0.0163793	0.127181	101110118|114115282|114115283|101113460|101118261|443085|101108532|101114126|101108502|100216440|101120669|101108127|101105152	http://www.genome.jp/kegg-bin/show_pathway?bta00010/bta:510551%09red/bta:509566%09red/bta:281275%09red/bta:282856%09red/bta:407109%09red/bta:507477%09red/bta:533910%09red/bta:507476%09red/bta:281617%09red/bta:404148%09red/bta:506459%09red/bta:514066%09red
Vitamin B6 metabolism	KEGG PATHWAY	bta00750	4	8	0.0174364	0.13152	101102548|443049|101117174|101120382	http://www.genome.jp/kegg-bin/show_pathway?bta00750/bta:514168%09red/bta:531699%09red/bta:533044%09red/bta:512573%09red
Proteasome	KEGG PATHWAY	bta03050	10	45	0.0223062	0.163578	101121959|100135690|100381249|101123468|101104946|101118048|101119978|101108368|101116408|100192424	http://www.genome.jp/kegg-bin/show_pathway?bta03050/bta:534640%09red/bta:511207%09red/bta:505176%09red/bta:539141%09red/bta:505050%09red/bta:535683%09red/bta:510155%09red/bta:514237%09red/bta:507213%09red/bta:515503%09red
beta-Alanine metabolism	KEGG PATHWAY	bta00410	8	32	0.0230294	0.164318	101105462|101122299|101112867|114116805|101106176|101117635|101108502|101108127	http://www.genome.jp/kegg-bin/show_pathway?bta00410/bta:507477%09red/bta:518852%09red/bta:280969%09red/bta:327692%09red/bta:281617%09red/bta:505968%09red/bta:281748%09red/bta:512341%09red
Pentose phosphate pathway	KEGG PATHWAY	bta00030	7	26	0.0241228	0.16759	101113460|101107229|443541|443085|100135441|100171395|101120994	http://www.genome.jp/kegg-bin/show_pathway?bta00030/bta:509566%09red/bta:513276%09red/bta:513453%09red/bta:445425%09red/bta:280910%09red/bta:514939%09red/bta:514066%09red
Biosynthesis of unsaturated fatty acids	KEGG PATHWAY	bta01040	6	22	0.0341434	0.229486	443185|101118274|101117331|101106744|101110086|101110625	http://www.genome.jp/kegg-bin/show_pathway?bta01040/bta:789567%09red/bta:617037%09red/bta:614105%09red/bta:533333%09red/bta:280924%09red/bta:508324%09red
PPAR signaling pathway	KEGG PATHWAY	bta03320	13	71	0.0347706	0.229486	101104317|114116805|443185|101111606|101108999|101111845|101117635|101118317|101110625|101117785|101120669|101111781|114108774	http://www.genome.jp/kegg-bin/show_pathway?bta03320/bta:768330%09red/bta:509963%09red/bta:518852%09red/bta:509500%09red/bta:281631%09red/bta:327700%09red/bta:504502%09red/bta:536628%09red/bta:280924%09red/bta:505968%09red/bta:282856%09red/bta:508918%09red/bta:508324%09red
Nitrogen metabolism	KEGG PATHWAY	bta00910	5	17	0.0410465	0.264299	114108602|101104372|121818379|101111288|101109718	http://www.genome.jp/kegg-bin/show_pathway?bta00910/bta:514494%09red/bta:281785%09red/bta:614323%09red/bta:280741%09red
Pentose and glucuronate interconversions	KEGG PATHWAY	bta00040	7	30	0.0426652	0.268181	442993|105606262|100534646|101114271|100534645|100534643|114116835	http://www.genome.jp/kegg-bin/show_pathway?bta00040/bta:100852322%09red/bta:286792%09red/bta:751790%09red/bta:281564%09red
Tyrosine metabolism	KEGG PATHWAY	bta00350	8	38	0.0488081	0.299659	114115282|114115283|443093|101102548|101113936|101108502|100034666|101118747	http://www.genome.jp/kegg-bin/show_pathway?bta00350/bta:510551%09red/bta:282105%09red/bta:281617%09red/bta:286886%09red/bta:531699%09red/bta:281206%09red/bta:514822%09red
Arginine and proline metabolism	KEGG PATHWAY	bta00330	11	61	0.0535801	0.321481	114108602|101112561|443093|101113801|100190977|101110431|101105895|114110822|101108127|121818379|101118747	http://www.genome.jp/kegg-bin/show_pathway?bta00330/bta:509751%09red/bta:281365%09red/bta:507477%09red/bta:100851864%09red/bta:286886%09red/bta:100126042%09red/bta:281785%09red/bta:281206%09red/bta:514509%09red/bta:768058%09red
Drug metabolism - other enzymes	KEGG PATHWAY	bta00983	7	37	0.0930161	0.545694	101116756|100534646|442993|100534645|100534643|101104144|101116336	http://www.genome.jp/kegg-bin/show_pathway?bta00983/bta:504305%09red/bta:512098%09red/bta:508916%09red/bta:751790%09red/bta:286792%09red
Synthesis and degradation of ketone bodies	KEGG PATHWAY	bta00072	3	11	0.122993	0.684223	101119699|101104112|101102177	http://www.genome.jp/kegg-bin/show_pathway?bta00072/bta:317658%09red/bta:535804%09red/bta:534090%09red
Phenylalanine, tyrosine and tryptophan biosynthesis	KEGG PATHWAY	bta00400	2	5	0.123599	0.684223	443093|101118747	http://www.genome.jp/kegg-bin/show_pathway?bta00400/bta:281206%09red/bta:286886%09red
Selenocompound metabolism	KEGG PATHWAY	bta00450	4	18	0.127209	0.684223	101118487|101121885|XLOC_041294|101123289	http://www.genome.jp/kegg-bin/show_pathway?bta00450/bta:539159%09red/bta:527922%09red/bta:282389%09red
Circadian entrainment	KEGG PATHWAY	bta04713	14	99	0.130709	0.684223	100192421|101104339|443218|443231|101102411|101108006|106991715|101111289|101118870|101114097|101102915|114109674|100125623|443273	http://www.genome.jp/kegg-bin/show_pathway?bta04713/bta:535158%09red/bta:525416%09red/bta:534626%09red/bta:539899%09red/bta:613600%09red/bta:281879%09red/bta:281791%09red/bta:281793%09red/bta:281796%09red/bta:511812%09red/bta:614154%09red/bta:539686%09red/bta:319095%09red/bta:280795%09red
Glycerolipid metabolism	KEGG PATHWAY	bta00561	9	57	0.131152	0.684223	101122246|121817901|101120972|101110535|101116033|101117659|101114511|101108127|101117229	http://www.genome.jp/kegg-bin/show_pathway?bta00561/bta:497202%09red/bta:785489%09red/bta:786474%09red/bta:507477%09red/bta:618076%09red/bta:512112%09red/bta:404129%09red
Nicotine addiction	KEGG PATHWAY	bta05033	7	41	0.132179	0.684223	100913155|121817145|101119532|101117759|101122774|443273|101102915	http://www.genome.jp/kegg-bin/show_pathway?bta05033/bta:282410%09red/bta:535158%09red/bta:780973%09red/bta:534626%09red/bta:539113%09red/bta:613670%09red/bta:540657%09red
Complement and coagulation cascades	KEGG PATHWAY	bta04610	11	75	0.142558	0.723755	101120391|101116376|114117340|101112066|106990096|101112329|443017|101108612|101123649|101111065|101122940	http://www.genome.jp/kegg-bin/show_pathway?bta04610/bta:508763%09red/bta:513856%09red/bta:617881%09red/bta:280687%09red/bta:533547%09red/bta:522347%09red/bta:280897%09red/bta:508222%09red/bta:280816%09red/bta:407126%09red
Cocaine addiction	KEGG PATHWAY	bta05030	8	51	0.152498	0.759613	101116743|101117101|101113882|101102411|106991715|100190973|100216465|101102915	http://www.genome.jp/kegg-bin/show_pathway?bta05030/bta:540819%09red/bta:509107%09red/bta:281791%09red/bta:281793%09red/bta:281066%09red/bta:100137840%09red/bta:535158%09red/bta:513105%09red
Fatty acid biosynthesis	KEGG PATHWAY	bta00061	3	13	0.166168	0.812379	443186|101111781|100170327	http://www.genome.jp/kegg-bin/show_pathway?bta00061/bta:536628%09red/bta:281152%09red/bta:281590%09red
Malaria	KEGG PATHWAY	bta05144	8	53	0.174063	0.835502	101106837|100885767|114110673|101115211|101112563|443076|100049064|101120656	http://www.genome.jp/kegg-bin/show_pathway?bta05144/bta:280855%09red/bta:100140149%09red/bta:541281%09red/bta:533894%09red/bta:529759%09red/bta:444863%09red/bta:281839%09red/bta:100850059%09red
Phenylalanine metabolism	KEGG PATHWAY	bta00360	4	21	0.179056	0.844119	443093|101108502|101108949|101118747	http://www.genome.jp/kegg-bin/show_pathway?bta00360/bta:281617%09red/bta:281206%09red/bta:280801%09red/bta:286886%09red
p53 signaling pathway	KEGG PATHWAY	bta04115	10	71	0.183671	0.850685	101103364|101119213|443318|101115240|100302546|106990092|101115970|101102510|100147799|100302083	http://www.genome.jp/kegg-bin/show_pathway?bta04115/bta:100850794%09red/bta:281239%09red/bta:515914%09red/bta:513497%09red/bta:540733%09red/bta:281671%09red/bta:505463%09red/bta:538226%09red/bta:534323%09red/bta:615414%09red
Proximal tubule bicarbonate reclamation	KEGG PATHWAY	bta04964	4	22	0.197704	0.899894	114108602|101120669|121818379|101109718	http://www.genome.jp/kegg-bin/show_pathway?bta04964/bta:281785%09red/bta:282856%09red/bta:280741%09red
Cysteine and methionine metabolism	KEGG PATHWAY	bta00270	6	39	0.209473	0.937301	101113992|443091|101118261|443093|101118487|101118747	http://www.genome.jp/kegg-bin/show_pathway?bta00270/bta:281275%09red/bta:615764%09red/bta:539159%09red/bta:281306%09red/bta:286886%09red/bta:281206%09red
Fructose and mannose metabolism	KEGG PATHWAY	bta00051	5	32	0.231195	1	101103393|101105711|443085|101109947|101113460	http://www.genome.jp/kegg-bin/show_pathway?bta00051/bta:509566%09red/bta:537070%09red/bta:618691%09red/bta:510978%09red/bta:514066%09red
Cholinergic synapse	KEGG PATHWAY	bta04725	14	112	0.232848	1	101106197|101113882|443218|101123239|101123388|101118870|106991715|101119532|101118630|101114097|101122774|100216465|100192421|114109674	http://www.genome.jp/kegg-bin/show_pathway?bta04725/bta:282410%09red/bta:540740%09red/bta:511812%09red/bta:538479%09red/bta:509107%09red/bta:281879%09red/bta:281791%09red/bta:525416%09red/bta:281796%09red/bta:539113%09red/bta:282702%09red/bta:280795%09red/bta:505963%09red/bta:513105%09red
AMPK signaling pathway	KEGG PATHWAY	bta04152	15	124	0.257483	1	101104483|100170327|443185|101111426|101122299|443186|443318|101118685|101102015|100534656|443515|101120669|101113882|101113460|443534	http://www.genome.jp/kegg-bin/show_pathway?bta04152/bta:281239%09red/bta:282856%09red/bta:537451%09red/bta:504219%09red/bta:505757%09red/bta:509200%09red/bta:281152%09red/bta:509613%09red/bta:281590%09red/bta:280836%09red/bta:281848%09red/bta:514066%09red/bta:280924%09red/bta:513105%09red/bta:512341%09red
Long-term depression	KEGG PATHWAY	bta04730	8	60	0.258681	1	101117078|101104339|101102411|443318|106991715|443515|114109674|443273	http://www.genome.jp/kegg-bin/show_pathway?bta04730/bta:536367%09red/bta:281239%09red/bta:534626%09red/bta:281879%09red/bta:281791%09red/bta:281793%09red/bta:281848%09red/bta:613600%09red
Glutamatergic synapse	KEGG PATHWAY	bta04724	14	115	0.260156	1	101116743|101117805|100192421|101107319|101110444|443246|101102411|101108742|106991715|101122701|101114097|101102915|114109674|443273	http://www.genome.jp/kegg-bin/show_pathway?bta04724/bta:538360%09red/bta:535158%09red/bta:533760%09red/bta:534626%09red/bta:618649%09red/bta:281879%09red/bta:281791%09red/bta:281793%09red/bta:615226%09red/bta:281796%09red/bta:511812%09red/bta:100137840%09red/bta:526363%09red/bta:282354%09red
alpha-Linolenic acid metabolism	KEGG PATHWAY	bta00592	4	26	0.277046	1	101120283|101120062|101110625|105605991	http://www.genome.jp/kegg-bin/show_pathway?bta00592/bta:494318%09red/bta:614911%09red/bta:506802%09red/bta:508324%09red
Glycerophospholipid metabolism	KEGG PATHWAY	bta00564	11	91	0.300366	1	101115344|101120062|101108821|XLOC_037183|101116033|101104692|101113687|101120972|101120283|101114511|105605991	http://www.genome.jp/kegg-bin/show_pathway?bta00564/bta:497202%09red/bta:785489%09red/bta:514456%09red/bta:494318%09red/bta:506802%09red/bta:511291%09red/bta:525042%09red/bta:614911%09red/bta:510274%09red/bta:512112%09red/bta:526175%09red
Lysine degradation	KEGG PATHWAY	bta00310	7	54	0.300423	1	101112867|101115360|101117635|101122862|101108127|101122190|101115990	http://www.genome.jp/kegg-bin/show_pathway?bta00310/bta:534599%09red/bta:507477%09red/bta:518852%09red/bta:515928%09red/bta:506310%09red/bta:532785%09red/bta:281748%09red
African trypanosomiasis	KEGG PATHWAY	bta05143	5	37	0.319277	1	101117785|114110673|100196903|101112563|100049064	http://www.genome.jp/kegg-bin/show_pathway?bta05143/bta:100140149%09red/bta:506281%09red/bta:281839%09red/bta:100850059%09red/bta:281631%09red
Morphine addiction	KEGG PATHWAY	bta05032	11	93	0.322909	1	101118773|100192421|100913155|101102411|121817145|106991715|101117759|101122774|101114097|101103544|101105363	http://www.genome.jp/kegg-bin/show_pathway?bta05032/bta:281970%09red/bta:282410%09red/bta:613670%09red/bta:780973%09red/bta:517040%09red/bta:506787%09red/bta:281791%09red/bta:281793%09red/bta:281796%09red/bta:511812%09red/bta:540657%09red
Synaptic vesicle cycle	KEGG PATHWAY	bta04721	8	65	0.325388	1	101119072|101104057|101102659|101114221|101123470|101122774|101122460|101102712	http://www.genome.jp/kegg-bin/show_pathway?bta04721/bta:282410%09red/bta:518974%09red/bta:782742%09red/bta:536553%09red/bta:613925%09red/bta:281511%09red/bta:100337128%09red/bta:505684%09red
Axon guidance	KEGG PATHWAY	bta04360	14	124	0.347798	1	101107068|105607800|101103695|101118946|101113839|101104962|106991715|100125613|100190973|101114662|100125614|101118617|101108158|443076	http://www.genome.jp/kegg-bin/show_pathway?bta04360/bta:535644%09red/bta:280855%09red/bta:534842%09red/bta:788119%09red/bta:506037%09red/bta:536815%09red/bta:528664%09red/bta:281791%09red/bta:522767%09red/bta:281066%09red/bta:100336601%09red/bta:527349%09red/bta:534731%09red/bta:524942%09red
Amino sugar and nucleotide sugar metabolism	KEGG PATHWAY	bta00520	6	48	0.350305	1	101116643|101103393|101109820|101115615|101114271|101105711	http://www.genome.jp/kegg-bin/show_pathway?bta00520/bta:516287%09red/bta:100336710%09red/bta:510978%09red/bta:281779%09red/bta:537070%09red/bta:281564%09red
Riboflavin metabolism	KEGG PATHWAY	bta00740	2	12	0.359042	1	101114832|101119750	http://www.genome.jp/kegg-bin/show_pathway?bta00740/bta:281650%09red/bta:515738%09red
Amphetamine addiction	KEGG PATHWAY	bta05031	8	69	0.380698	1	101117101|101113882|443218|101102411|101118870|100216465|101102915|443273	http://www.genome.jp/kegg-bin/show_pathway?bta05031/bta:540819%09red/bta:534626%09red/bta:509107%09red/bta:281793%09red/bta:525416%09red/bta:535158%09red/bta:280795%09red/bta:513105%09red
Circadian rhythm	KEGG PATHWAY	bta04710	4	31	0.381306	1	114108593|100125623|101104483|101119104	http://www.genome.jp/kegg-bin/show_pathway?bta04710/bta:614154%09red/bta:527470%09red/bta:504219%09red/bta:615427%09red
Staphylococcus aureus infection	KEGG PATHWAY	bta05150	7	61	0.40472	1	101112563|114117340|101112066|106990096|100192432|101111065|101108696	http://www.genome.jp/kegg-bin/show_pathway?bta05150/bta:522347%09red/bta:280897%09red/bta:282229%09red/bta:280816%09red/bta:100848815%09red/bta:281839%09red
Melanoma	KEGG PATHWAY	bta05218	8	71	0.408587	1	101109353|443076|443318|443515|101119747|101112600|100302083|443074	http://www.genome.jp/kegg-bin/show_pathway?bta05218/bta:280855%09red/bta:281239%09red/bta:513497%09red/bta:281160%09red/bta:281848%09red/bta:613787%09red/bta:282637%09red/bta:326285%09red
Dopaminergic synapse	KEGG PATHWAY	bta04728	14	130	0.409076	1	101113882|443218|101102411|101118870|106991715|101102015|101122774|100037703|101114097|101123531|100216465|100192421|114109674|443273	http://www.genome.jp/kegg-bin/show_pathway?bta04728/bta:529590%09red/bta:282410%09red/bta:525416%09red/bta:534626%09red/bta:509107%09red/bta:281879%09red/bta:281791%09red/bta:505757%09red/bta:281793%09red/bta:281796%09red/bta:511812%09red/bta:280795%09red/bta:514261%09red/bta:513105%09red
Insulin signaling pathway	KEGG PATHWAY	bta04910	15	140	0.41024	1	101104483|100170327|101111426|101106003|443186|101114404|101118685|101116863|101118483|101113847|101120669|442998|100294595|101113460|101102871	http://www.genome.jp/kegg-bin/show_pathway?bta04910/bta:525906%09red/bta:282856%09red/bta:533455%09red/bta:787914%09red/bta:100139910%09red/bta:504219%09red/bta:282081%09red/bta:509613%09red/bta:282463%09red/bta:281590%09red/bta:514428%09red/bta:281152%09red/bta:327664%09red/bta:537451%09red/bta:514066%09red
Glycosaminoglycan degradation	KEGG PATHWAY	bta00531	3	23	0.413007	1	101107188|101108314|101102252	http://www.genome.jp/kegg-bin/show_pathway?bta00531/bta:353352%09red/bta:538401%09red/bta:100851063%09red
Protein export	KEGG PATHWAY	bta03060	3	23	0.413007	1	101104068|101107383|101116789	http://www.genome.jp/kegg-bin/show_pathway?bta03060/bta:504842%09red/bta:514960%09red/bta:786732%09red
Histidine metabolism	KEGG PATHWAY	bta00340	3	23	0.413007	1	101108127|101108502|101112561	http://www.genome.jp/kegg-bin/show_pathway?bta00340/bta:509751%09red/bta:507477%09red/bta:281617%09red
Sulfur metabolism	KEGG PATHWAY	bta00920	2	14	0.424397	1	106990092|101108154	http://www.genome.jp/kegg-bin/show_pathway?bta00920/bta:100850794%09red/bta:509150%09red
HIF-1 signaling pathway	KEGG PATHWAY	bta04066	11	102	0.427436	1	101113205|101111426|101110118|101116863|443318|101118870|443515|101107460|101114163|100302083|443103	http://www.genome.jp/kegg-bin/show_pathway?bta04066/bta:617915%09red/bta:281239%09red/bta:281572%09red/bta:787914%09red/bta:407109%09red/bta:513497%09red/bta:534075%09red/bta:509613%09red/bta:281848%09red/bta:525416%09red/bta:528655%09red
Cyanoamino acid metabolism	KEGG PATHWAY	bta00460	1	5	0.429194	1	443544	http://www.genome.jp/kegg-bin/show_pathway?bta00460/bta:509002%09red
Arachidonic acid metabolism	KEGG PATHWAY	bta00590	8	73	0.436442	1	101114663|101120062|101120283|101121761|100820742|114117992|105614373|105605991	http://www.genome.jp/kegg-bin/show_pathway?bta00590/bta:515946%09red/bta:494318%09red/bta:506802%09red/bta:507130%09red/bta:614911%09red/bta:281209%09red/bta:504769%09red
Insulin secretion	KEGG PATHWAY	bta04911	9	84	0.450681	1	101113882|443231|101102411|100620053|100620050|101118870|100216465|114109674|100270685	http://www.genome.jp/kegg-bin/show_pathway?bta04911/bta:534568%09red/bta:509107%09red/bta:281879%09red/bta:281793%09red/bta:525416%09red/bta:520448%09red/bta:282573%09red/bta:319095%09red/bta:513105%09red
Glycosaminoglycan biosynthesis - keratan sulfate	KEGG PATHWAY	bta00533	2	15	0.455757	1	100620048|101112159	http://www.genome.jp/kegg-bin/show_pathway?bta00533/bta:506932%09red/bta:281781%09red
Linoleic acid metabolism	KEGG PATHWAY	bta00591	4	35	0.463739	1	101110727|101120062|101120283|105605991	http://www.genome.jp/kegg-bin/show_pathway?bta00591/bta:494318%09red/bta:614911%09red/bta:506802%09red/bta:282214%09red
Vasopressin-regulated water reabsorption	KEGG PATHWAY	bta04962	5	45	0.464509	1	443024|101102411|101121274|101113882|101118013	http://www.genome.jp/kegg-bin/show_pathway?bta04962/bta:540369%09red/bta:281793%09red/bta:613724%09red/bta:513105%09red/bta:539870%09red
GABAergic synapse	KEGG PATHWAY	bta04727	9	87	0.489407	1	101105462|100913155|121817145|106991715|101117759|101122774|101114097|101103544|100192421	http://www.genome.jp/kegg-bin/show_pathway?bta04727/bta:282410%09red/bta:613670%09red/bta:511812%09red/bta:780973%09red/bta:517040%09red/bta:280969%09red/bta:281791%09red/bta:281796%09red/bta:540657%09red
Primary bile acid biosynthesis	KEGG PATHWAY	bta00120	2	17	0.515372	1	101103641|114108774	http://www.genome.jp/kegg-bin/show_pathway?bta00120/bta:513855%09red/bta:508918%09red
Arrhythmogenic right ventricular cardiomyopathy (ARVC)	KEGG PATHWAY	bta05412	7	69	0.522765	1	443209|101104733|101116192|101115445|101122427|100170321|101121501	http://www.genome.jp/kegg-bin/show_pathway?bta05412/bta:282644%09red/bta:537784%09red/bta:526848%09red/bta:281062%09red/bta:286800%09red/bta:281128%09red/bta:506953%09red
Bladder cancer	KEGG PATHWAY	bta05219	4	38	0.52291	1	443447|101119747|100302083|443103	http://www.genome.jp/kegg-bin/show_pathway?bta05219/bta:513497%09red/bta:511077%09red/bta:281572%09red/bta:282637%09red
Bile secretion	KEGG PATHWAY	bta04976	7	70	0.536972	1	101120537|101106534|443184|101111038|101117544|101120653|101102411	http://www.genome.jp/kegg-bin/show_pathway?bta04976/bta:535293%09red/bta:516762%09red/bta:404160%09red/bta:515333%09red/bta:281793%09red/bta:404128%09red/bta:516626%09red
Oxytocin signaling pathway	KEGG PATHWAY	bta04921	15	153	0.538091	1	101106197|101104339|443218|101104483|100302083|101102411|106991715|101111289|101103450|101118870|101122427|101118617|443390|114109674|101123388	http://www.genome.jp/kegg-bin/show_pathway?bta04921/bta:540740%09red/bta:280888%09red/bta:539899%09red/bta:513497%09red/bta:788119%09red/bta:538479%09red/bta:281793%09red/bta:281879%09red/bta:286800%09red/bta:281791%09red/bta:508029%09red/bta:525416%09red/bta:613600%09red/bta:280795%09red/bta:504219%09red
One carbon pool by folate	KEGG PATHWAY	bta00670	2	18	0.543509	1	443544|101114182	http://www.genome.jp/kegg-bin/show_pathway?bta00670/bta:509002%09red/bta:516864%09red
Thyroid hormone synthesis	KEGG PATHWAY	bta04918	7	71	0.551004	1	101115381|101116157|101102411|100820742|101113882|100216465|114109674	http://www.genome.jp/kegg-bin/show_pathway?bta04918/bta:531519%09red/bta:509107%09red/bta:281879%09red/bta:281793%09red/bta:509121%09red/bta:281209%09red/bta:513105%09red
Pantothenate and CoA biosynthesis	KEGG PATHWAY	bta00770	2	19	0.570486	1	101105005|443450	http://www.genome.jp/kegg-bin/show_pathway?bta00770/bta:526704%09red/bta:281643%09red
Nicotinate and nicotinamide metabolism	KEGG PATHWAY	bta00760	3	30	0.574341	1	101102548|101109937|101104592	http://www.genome.jp/kegg-bin/show_pathway?bta00760/bta:531699%09red/bta:513419%09red/bta:100337285%09red
Thyroid cancer	KEGG PATHWAY	bta05216	3	30	0.574341	1	443447|101119747|101111845	http://www.genome.jp/kegg-bin/show_pathway?bta05216/bta:511077%09red/bta:509500%09red/bta:282637%09red
Phototransduction	KEGG PATHWAY	bta04744	3	30	0.574341	1	101117520|101122024|101114097	http://www.genome.jp/kegg-bin/show_pathway?bta04744/bta:281973%09red/bta:281796%09red/bta:281977%09red
RNA polymerase	KEGG PATHWAY	bta03020	3	30	0.574341	1	101103555|101116826|101111182	http://www.genome.jp/kegg-bin/show_pathway?bta03020/bta:512971%09red/bta:767843%09red/bta:534232%09red
Other types of O-glycan biosynthesis	KEGG PATHWAY	bta00514	3	30	0.574341	1	100620048|101103554|101108300	http://www.genome.jp/kegg-bin/show_pathway?bta00514/bta:493992%09red/bta:281781%09red/bta:505267%09red
Salivary secretion	KEGG PATHWAY	bta04970	8	84	0.583556	1	114117324|101104339|101102411|101111289|443251|443424|114109674|100270685	http://www.genome.jp/kegg-bin/show_pathway?bta04970/bta:282167%09red/bta:539899%09red/bta:281879%09red/bta:281793%09red/bta:282573%09red/bta:613600%09red/bta:282146%09red/bta:782368%09red
Mucin type O-Glycan biosynthesis	KEGG PATHWAY	bta00512	3	31	0.595048	1	101117195|101109586|101104386	http://www.genome.jp/kegg-bin/show_pathway?bta00512/bta:505622%09red/bta:540500%09red
ECM-receptor interaction	KEGG PATHWAY	bta04512	8	85	0.596062	1	101106837|443209|101123066|101111424|101115445|101115211|101118337|101114569	http://www.genome.jp/kegg-bin/show_pathway?bta04512/bta:540664%09red/bta:541281%09red/bta:531254%09red/bta:529759%09red/bta:282644%09red/bta:100336616%09red/bta:530102%09red/bta:506953%09red
ErbB signaling pathway	KEGG PATHWAY	bta04012	8	85	0.596062	1	101111426|101114404|101112537|443447|101118870|101113847|101121348|100302083	http://www.genome.jp/kegg-bin/show_pathway?bta04012/bta:533455%09red/bta:783452%09red/bta:513497%09red/bta:539977%09red/bta:509613%09red/bta:525906%09red/bta:525416%09red/bta:511077%09red
Other glycan degradation	KEGG PATHWAY	bta00511	2	20	0.596284	1	101117846|XLOC_057307	http://www.genome.jp/kegg-bin/show_pathway?bta00511/bta:532207%09red
ABC transporters	KEGG PATHWAY	bta02010	4	42	0.596527	1	101118659|101106534|101103525|101107781	http://www.genome.jp/kegg-bin/show_pathway?bta02010/bta:515333%09red/bta:536724%09red/bta:526059%09red/bta:510745%09red
Taste transduction	KEGG PATHWAY	bta04742	4	42	0.596527	1	101122774|101102411|114109674|101120341	http://www.genome.jp/kegg-bin/show_pathway?bta04742/bta:281879%09red/bta:282410%09red/bta:281793%09red/bta:617930%09red
Ubiquinone and other terpenoid-quinone biosynthesis	KEGG PATHWAY	bta00130	1	9	0.607251	1	101116112	http://www.genome.jp/kegg-bin/show_pathway?bta00130/bta:504771%09red
Rheumatoid arthritis	KEGG PATHWAY	bta05323	9	97	0.611614	1	780517|101108696|443218|101102659|101114221|101104057|443103|101113771|101112563	http://www.genome.jp/kegg-bin/show_pathway?bta05323/bta:616364%09red/bta:281572%09red/bta:518974%09red/bta:504507%09red/bta:613925%09red/bta:280795%09red/bta:100848815%09red/bta:281839%09red/bta:505684%09red
Steroid biosynthesis	KEGG PATHWAY	bta00100	2	21	0.6209	1	101113583|101123162	http://www.genome.jp/kegg-bin/show_pathway?bta00100/bta:505060%09red/bta:533726%09red
Ether lipid metabolism	KEGG PATHWAY	bta00565	4	44	0.630676	1	101108821|101120062|101120283|105605991	http://www.genome.jp/kegg-bin/show_pathway?bta00565/bta:494318%09red/bta:614911%09red/bta:506802%09red/bta:511291%09red
Taurine and hypotaurine metabolism	KEGG PATHWAY	bta00430	1	10	0.6423	1	101108100	http://www.genome.jp/kegg-bin/show_pathway?bta00430/bta:516241%09red
Vitamin digestion and absorption	KEGG PATHWAY	bta04977	2	22	0.644339	1	101117785|101110110	http://www.genome.jp/kegg-bin/show_pathway?bta04977/bta:617307%09red/bta:281631%09red
Estrogen signaling pathway	KEGG PATHWAY	bta04915	9	100	0.645274	1	101113882|101118565|443218|101102411|106991715|101113847|100216465|114109674|101103544	http://www.genome.jp/kegg-bin/show_pathway?bta04915/bta:517040%09red/bta:533455%09red/bta:535704%09red/bta:509107%09red/bta:281879%09red/bta:281791%09red/bta:281793%09red/bta:280795%09red/bta:513105%09red
Neuroactive ligand-receptor interaction	KEGG PATHWAY	bta04080	27	295	0.661316	1	101117078|121817145|101118819|101112066|101117759|101122701|101118381|101103544|101119614|100913155|101110677|101119532|443361|443273|101102915|101114407|101123239|101108742|101107652|100500782|101102228|443534|101107319|101110444|443231|101109484|443425	http://www.genome.jp/kegg-bin/show_pathway?bta04080/bta:538360%09red/bta:281198%09red/bta:541160%09red/bta:539113%09red/bta:526363%09red/bta:521831%09red/bta:536367%09red/bta:613670%09red/bta:534626%09red/bta:319095%09red/bta:512581%09red/bta:282702%09red/bta:533760%09red/bta:281549%09red/bta:281963%09red/bta:504813%09red/bta:280836%09red/bta:281665%09red/bta:540657%09red/bta:618262%09red/bta:517…
Ribosome	KEGG PATHWAY	bta03010	12	136	0.677887	1	114111248|101115288|101103507|121818183|101106861|101104797|101106507|101116863|101117023|101114736|101112227|101109581	http://www.genome.jp/kegg-bin/show_pathway?bta03010/bta:510058%09red/bta:326584%09red/bta:614220%09red/bta:540278%09red/bta:282847%09red/bta:617901%09red/bta:508216%09red/bta:614579%09red/bta:507168%09red/bta:787914%09red/bta:504663%09red/bta:618609%09red
Retrograde endocannabinoid signaling	KEGG PATHWAY	bta04723	9	104	0.687497	1	100913155|121817145|106991715|101117759|101122774|101114097|100192421|114109674|443273	http://www.genome.jp/kegg-bin/show_pathway?bta04723/bta:282410%09red/bta:613670%09red/bta:780973%09red/bta:534626%09red/bta:281879%09red/bta:281791%09red/bta:281796%09red/bta:511812%09red/bta:540657%09red
Glycosaminoglycan biosynthesis - heparan sulfate / heparin	KEGG PATHWAY	bta00534	2	24	0.687749	1	101113394|101110949	http://www.genome.jp/kegg-bin/show_pathway?bta00534/bta:538566%09red/bta:511060%09red
Mineral absorption	KEGG PATHWAY	bta04978	4	48	0.693167	1	101113825|101120910|443451|101105882	http://www.genome.jp/kegg-bin/show_pathway?bta04978/bta:281658%09red/bta:100851799%09red/bta:613998%09red/bta:513221%09red
Sphingolipid metabolism	KEGG PATHWAY	bta00600	4	48	0.693167	1	101116130|101121732|101114836|101112511	http://www.genome.jp/kegg-bin/show_pathway?bta00600/bta:524460%09red/bta:615110%09red/bta:100336736%09red/bta:100337041%09red
Adipocytokine signaling pathway	KEGG PATHWAY	bta04920	6	71	0.694218	1	101104483|101111781|101111845|101120669|100294595|443534	http://www.genome.jp/kegg-bin/show_pathway?bta04920/bta:282856%09red/bta:509500%09red/bta:504219%09red/bta:282081%09red/bta:536628%09red/bta:280836%09red
Serotonergic synapse	KEGG PATHWAY	bta04726	10	117	0.705856	1	100568286|100913155|101102411|114114084|106991715|101122774|101114097|101112384|100192421|114109674	http://www.genome.jp/kegg-bin/show_pathway?bta04726/bta:282410%09red/bta:282211%09red/bta:281879%09red/bta:281791%09red/bta:281793%09red/bta:281796%09red/bta:511812%09red/bta:540657%09red
Folate biosynthesis	KEGG PATHWAY	bta00790	1	13	0.72978	1	101123195	http://www.genome.jp/kegg-bin/show_pathway?bta00790/bta:280994%09red
Purine metabolism	KEGG PATHWAY	bta00230	15	176	0.734462	1	101117520|101118773|101108212|101103031|101106352|101111182|101122598|101114471|101122024|101104144|101103555|101116826|101105363|102238525|101104339	http://www.genome.jp/kegg-bin/show_pathway?bta00230/bta:504305%09red/bta:281970%09red/bta:534232%09red/bta:280712%09red/bta:517063%09red/bta:512971%09red/bta:506787%09red/bta:281973%09red/bta:102216273%09red/bta:281977%09red/bta:767843%09red/bta:506087%09red/bta:281217%09red/bta:613600%09red/bta:282244%09red
Prolactin signaling pathway	KEGG PATHWAY	bta04917	6	75	0.740028	1	101104338|443218|101113847|100147799|105601846|100294595	http://www.genome.jp/kegg-bin/show_pathway?bta04917/bta:533455%09red/bta:539420%09red/bta:282081%09red/bta:101908425%09red/bta:280795%09red/bta:615414%09red
Calcium signaling pathway	KEGG PATHWAY	bta04020	16	188	0.741026	1	114117324|101118773|101106906|101111516|101102411|101118819|443425|101111289|101118870|101122774|101118381|101105703|100147787|101116716|114109674|101102915	http://www.genome.jp/kegg-bin/show_pathway?bta04020/bta:618262%09red/bta:281970%09red/bta:282410%09red/bta:535158%09red/bta:414346%09red/bta:539899%09red/bta:519037%09red/bta:281879%09red/bta:281549%09red/bta:281793%09red/bta:541008%09red/bta:525416%09red/bta:282478%09red/bta:281665%09red/bta:282146%09red/bta:337925%09red
Prostate cancer	KEGG PATHWAY	bta05215	7	87	0.74417	1	101113882|443318|443515|100820756|100216465|101112600|100302083	http://www.genome.jp/kegg-bin/show_pathway?bta05215/bta:281239%09red/bta:527024%09red/bta:513497%09red/bta:509107%09red/bta:281848%09red/bta:613787%09red/bta:513105%09red
Homologous recombination	KEGG PATHWAY	bta03440	2	27	0.744583	1	101110770|101108908	http://www.genome.jp/kegg-bin/show_pathway?bta03440/bta:533414%09red/bta:515765%09red
Glioma	KEGG PATHWAY	bta05214	5	64	0.748313	1	100302083|101118870|443318|443515|101113847	http://www.genome.jp/kegg-bin/show_pathway?bta05214/bta:281239%09red/bta:533455%09red/bta:281848%09red/bta:513497%09red/bta:525416%09red
Lysosome	KEGG PATHWAY	bta04142	10	123	0.758335	1	114110441|101104057|101108314|101121692|101114221|101109286|101120623|101102252|101121049|780470	http://www.genome.jp/kegg-bin/show_pathway?bta04142/bta:286772%09red/bta:518974%09red/bta:281105%09red/bta:280798%09red/bta:100851063%09red/bta:281421%09red/bta:513067%09red/bta:538401%09red/bta:505684%09red
Ovarian steroidogenesis	KEGG PATHWAY	bta04913	4	53	0.760139	1	101102411|443318|443515|105601846	http://www.genome.jp/kegg-bin/show_pathway?bta04913/bta:101908425%09red/bta:281239%09red/bta:281793%09red/bta:281848%09red
Glycosphingolipid biosynthesis - lacto and neolacto series	KEGG PATHWAY	bta00601	2	28	0.761452	1	100620048|101122666	http://www.genome.jp/kegg-bin/show_pathway?bta00601/bta:539027%09red/bta:281781%09red
Gap junction	KEGG PATHWAY	bta04540	7	89	0.763571	1	101104339|101102411|106991715|100303606|101118605|101112600|114109674	http://www.genome.jp/kegg-bin/show_pathway?bta04540/bta:281879%09red/bta:281791%09red/bta:615087%09red/bta:281793%09red/bta:768036%09red/bta:613787%09red/bta:613600%09red
Long-term potentiation	KEGG PATHWAY	bta04720	5	66	0.770439	1	114109674|100216465|101107087|101118870|101102915	http://www.genome.jp/kegg-bin/show_pathway?bta04720/bta:281879%09red/bta:767949%09red/bta:535158%09red/bta:525416%09red/bta:509107%09red
Renal cell carcinoma	KEGG PATHWAY	bta05211	5	66	0.770439	1	443076|101114163|100302102|443103|100135448	http://www.genome.jp/kegg-bin/show_pathway?bta05211/bta:520260%09red/bta:534075%09red/bta:533445%09red/bta:281572%09red/bta:280855%09red
Collecting duct acid secretion	KEGG PATHWAY	bta04966	2	29	0.777345	1	101102659|101104057	http://www.genome.jp/kegg-bin/show_pathway?bta04966/bta:613925%09red/bta:518974%09red
Wnt signaling pathway	KEGG PATHWAY	bta04310	11	138	0.785583	1	114108593|101109531|101123633|100147799|443447|101104709|101118870|101107858|101114123|114118764|101118617	http://www.genome.jp/kegg-bin/show_pathway?bta04310/bta:540179%09red/bta:525416%09red/bta:788119%09red/bta:511077%09red/bta:541161%09red/bta:615427%09red/bta:282880%09red/bta:525135%09red/bta:789390%09red/bta:518004%09red/bta:615414%09red
Intestinal immune network for IgA production	KEGG PATHWAY	bta04672	4	56	0.79453	1	780517|106991909|101108696|678679	http://www.genome.jp/kegg-bin/show_pathway?bta04672/bta:784268%09red/bta:615986%09red/bta:100848815%09red/bta:504507%09red
Pancreatic secretion	KEGG PATHWAY	bta04972	7	95	0.815286	1	114117324|101120062|101112329|101102411|114109674|100270685|105605991	http://www.genome.jp/kegg-bin/show_pathway?bta04972/bta:494318%09red/bta:281879%09red/bta:614911%09red/bta:281793%09red/bta:508222%09red/bta:282573%09red/bta:282146%09red
Cell adhesion molecules (CAMs)	KEGG PATHWAY	bta04514	12	154	0.815396	1	101106837|100170321|101112563|101116672|780477|101108158|101119516|101119747|101106322|100294605|101116577|101108696	http://www.genome.jp/kegg-bin/show_pathway?bta04514/bta:100337375%09red/bta:537808%09red/bta:101909176%09red/bta:528664%09red/bta:414921%09red/bta:282637%09red/bta:281062%09red/bta:781106%09red/bta:540576%09red/bta:100848815%09red/bta:281839%09red/bta:529759%09red
PI3K-Akt signaling pathway	KEGG PATHWAY	bta04151	29	346	0.815869	1	101111426|101114569|101111424|101107121|443447|101112600|100302083|443209|101116863|101118685|443103|100192421|101113882|101109353|101113222|101115445|101102015|443515|101107460|101114097|101120669|100216465|101115211|101119606|443318|443074|100147799|443076|101118337	http://www.genome.jp/kegg-bin/show_pathway?bta04151/bta:541281%09red/bta:531254%09red/bta:511077%09red/bta:509107%09red/bta:537451%09red/bta:617915%09red/bta:281572%09red/bta:540664%09red/bta:282644%09red/bta:505757%09red/bta:509613%09red/bta:513105%09red/bta:787914%09red/bta:528390%09red/bta:787270%09red/bta:513497%09red/bta:615414%09red/bta:281239%09red/bta:282856%09red/bta:517909%09red/bta:281…
Vascular smooth muscle contraction	KEGG PATHWAY	bta04270	9	119	0.816222	1	101120062|101104339|101114256|101102411|100620053|100620050|114109674|100270685|105605991	http://www.genome.jp/kegg-bin/show_pathway?bta04270/bta:281595%09red/bta:494318%09red/bta:534568%09red/bta:281879%09red/bta:614911%09red/bta:281793%09red/bta:520448%09red/bta:282573%09red/bta:613600%09red
Galactose metabolism	KEGG PATHWAY	bta00052	2	32	0.819572	1	101121692|100620048	http://www.genome.jp/kegg-bin/show_pathway?bta00052/bta:281781%09red/bta:280798%09red
cGMP-PKG signaling pathway	KEGG PATHWAY	bta04022	13	167	0.823824	1	114117324|101113882|101104339|100620053|106991715|100620050|101111516|101118617|100216465|101116716|114109674|100147787|100270685	http://www.genome.jp/kegg-bin/show_pathway?bta04022/bta:337925%09red/bta:414346%09red/bta:788119%09red/bta:534568%09red/bta:509107%09red/bta:281879%09red/bta:281791%09red/bta:513105%09red/bta:520448%09red/bta:282478%09red/bta:282573%09red/bta:613600%09red/bta:282146%09red
Chronic myeloid leukemia	KEGG PATHWAY	bta05220	5	73	0.836232	1	443447|101113436|100302083|101113847|101114404	http://www.genome.jp/kegg-bin/show_pathway?bta05220/bta:513497%09red/bta:533455%09red/bta:525906%09red/bta:511077%09red/bta:789892%09red
FoxO signaling pathway	KEGG PATHWAY	bta04068	10	134	0.836806	1	101104483|101118186|443318|101115240|443515|101107121|100147799|101120669|101115990|100302083	http://www.genome.jp/kegg-bin/show_pathway?bta04068/bta:281239%09red/bta:282856%09red/bta:517909%09red/bta:513497%09red/bta:520939%09red/bta:515928%09red/bta:505463%09red/bta:281848%09red/bta:504219%09red/bta:615414%09red
mTOR signaling pathway	KEGG PATHWAY	bta04150	4	61	0.842908	1	101116863|443318|101111426|443103	http://www.genome.jp/kegg-bin/show_pathway?bta04150/bta:281239%09red/bta:509613%09red/bta:281572%09red/bta:787914%09red
SNARE interactions in vesicular transport	KEGG PATHWAY	bta04130	2	34	0.843584	1	101112362|101114615	http://www.genome.jp/kegg-bin/show_pathway?bta04130/bta:614775%09red/bta:780809%09red
Gastric acid secretion	KEGG PATHWAY	bta04971	5	74	0.844236	1	101118381|101102411|114109674|101118870|106991715	http://www.genome.jp/kegg-bin/show_pathway?bta04971/bta:281879%09red/bta:281791%09red/bta:281793%09red/bta:525416%09red/bta:281665%09red
Cytosolic DNA-sensing pathway	KEGG PATHWAY	bta04623	4	62	0.85134	1	101103555|101116826|101116705|101111182	http://www.genome.jp/kegg-bin/show_pathway?bta04623/bta:512971%09red/bta:767843%09red/bta:534232%09red/bta:507054%09red
Bacterial invasion of epithelial cells	KEGG PATHWAY	bta05100	5	75	0.851915	1	101119747|101121501|443076|101113847|101114404	http://www.genome.jp/kegg-bin/show_pathway?bta05100/bta:280855%09red/bta:525906%09red/bta:533455%09red/bta:526848%09red/bta:282637%09red
DNA replication	KEGG PATHWAY	bta03030	2	35	0.854469	1	101108908|101105877	http://www.genome.jp/kegg-bin/show_pathway?bta03030/bta:540969%09red/bta:515765%09red
Phagosome	KEGG PATHWAY	bta04145	12	161	0.855185	1	100303606|101108696|101104057|101102659|101114221|101118013|101115211|101112362|101118605|101106452|100192432|101111081	http://www.genome.jp/kegg-bin/show_pathway?bta04145/bta:281111%09red/bta:541281%09red/bta:613724%09red/bta:518974%09red/bta:614775%09red/bta:615087%09red/bta:282229%09red/bta:317777%09red/bta:505684%09red/bta:613925%09red/bta:100848815%09red/bta:768036%09red
Transcriptional misregulation in cancer	KEGG PATHWAY	bta05202	13	173	0.856105	1	101113187|443076|101118553|443318|101111845|443447|101122759|443515|100147799|101109224|100302083|100135448|443273	http://www.genome.jp/kegg-bin/show_pathway?bta05202/bta:280855%09red/bta:281239%09red/bta:505691%09red/bta:528877%09red/bta:534626%09red/bta:533445%09red/bta:513497%09red/bta:509500%09red/bta:281848%09red/bta:281677%09red/bta:282713%09red/bta:511077%09red/bta:615414%09red
N-Glycan biosynthesis	KEGG PATHWAY	bta00510	3	50	0.863093	1	100620048|101108300|101118089	http://www.genome.jp/kegg-bin/show_pathway?bta00510/bta:493992%09red/bta:615012%09red/bta:281781%09red
cAMP signaling pathway	KEGG PATHWAY	bta04024	15	199	0.867617	1	114117324|101106534|101113882|101111396|443218|101110137|443231|101102411|106991715|101118870|443361|101105703|101103544|101102915|443273	http://www.genome.jp/kegg-bin/show_pathway?bta04024/bta:515718%09red/bta:515333%09red/bta:517040%09red/bta:535158%09red/bta:504813%09red/bta:534626%09red/bta:540830%09red/bta:519037%09red/bta:281791%09red/bta:281793%09red/bta:282146%09red/bta:525416%09red/bta:280795%09red/bta:319095%09red/bta:513105%09red
Endometrial cancer	KEGG PATHWAY	bta05213	3	51	0.871426	1	443447|101119747|101121501	http://www.genome.jp/kegg-bin/show_pathway?bta05213/bta:511077%09red/bta:282637%09red/bta:526848%09red
Glycosaminoglycan biosynthesis - chondroitin sulfate / dermatan sulfate	KEGG PATHWAY	bta00532	1	21	0.872108	1	101113667	http://www.genome.jp/kegg-bin/show_pathway?bta00532/bta:528860%09red
Proteoglycans in cancer	KEGG PATHWAY	bta05205	15	201	0.876159	1	101106837|101119285|101109531|443076|101114404|101116863|100302083|443318|443447|101118870|443515|443103|101105703|114109674|443325	http://www.genome.jp/kegg-bin/show_pathway?bta05205/bta:280855%09red/bta:281239%09red/bta:525416%09red/bta:281572%09red/bta:787914%09red/bta:529759%09red/bta:519037%09red/bta:281879%09red/bta:511077%09red/bta:281848%09red/bta:281240%09red/bta:525135%09red/bta:525906%09red/bta:513497%09red/bta:615239%09red
Fanconi anemia pathway	KEGG PATHWAY	bta03460	3	52	0.879307	1	101114968|101107297|101110067	http://www.genome.jp/kegg-bin/show_pathway?bta03460/bta:618018%09red/bta:613732%09red/bta:517422%09red
Hypertrophic cardiomyopathy (HCM)	KEGG PATHWAY	bta05410	5	79	0.879539	1	101104483|101122427|443209|443318|101115445	http://www.genome.jp/kegg-bin/show_pathway?bta05410/bta:286800%09red/bta:281239%09red/bta:282644%09red/bta:504219%09red/bta:506953%09red
Regulation of autophagy	KEGG PATHWAY	bta04140	2	38	0.883093	1	101121977|101113390	http://www.genome.jp/kegg-bin/show_pathway?bta04140/bta:787967%09red/bta:408003%09red
Mismatch repair	KEGG PATHWAY	bta03430	1	22	0.883526	1	101108908	http://www.genome.jp/kegg-bin/show_pathway?bta03430/bta:515765%09red
Aldosterone-regulated sodium reabsorption	KEGG PATHWAY	bta04960	2	39	0.891414	1	101122748|443318	http://www.genome.jp/kegg-bin/show_pathway?bta04960/bta:510003%09red/bta:281239%09red
Dorso-ventral axis formation	KEGG PATHWAY	bta04320	1	23	0.893926	1	101103838	http://www.genome.jp/kegg-bin/show_pathway?bta04320/bta:509545%09red
Adherens junction	KEGG PATHWAY	bta04520	4	68	0.894232	1	101119747|443076|101121501|443515	http://www.genome.jp/kegg-bin/show_pathway?bta04520/bta:280855%09red/bta:281848%09red/bta:282637%09red/bta:526848%09red
Amyotrophic lateral sclerosis (ALS)	KEGG PATHWAY	bta05014	3	55	0.900428	1	106990092|101107472|101102915	http://www.genome.jp/kegg-bin/show_pathway?bta05014/bta:100850794%09red/bta:535158%09red/bta:528842%09red
Protein digestion and absorption	KEGG PATHWAY	bta04974	5	83	0.902641	1	101111152|101116716|101112329|101111424|101114569	http://www.genome.jp/kegg-bin/show_pathway?bta04974/bta:337925%09red/bta:280781%09red/bta:530102%09red/bta:508222%09red/bta:531254%09red
Legionellosis	KEGG PATHWAY	bta05134	3	56	0.90669	1	106990092|101112362|101102857	http://www.genome.jp/kegg-bin/show_pathway?bta05134/bta:100850794%09red/bta:614775%09red/bta:282220%09red
Acute myeloid leukemia	KEGG PATHWAY	bta05221	3	56	0.90669	1	443447|101118553|101111426	http://www.genome.jp/kegg-bin/show_pathway?bta05221/bta:511077%09red/bta:509613%09red/bta:281677%09red
Apoptosis	KEGG PATHWAY	bta04210	5	84	0.907776	1	780458|101106003|101118483|106990092|101121574	http://www.genome.jp/kegg-bin/show_pathway?bta04210/bta:100850794%09red/bta:100139910%09red/bta:282463%09red/bta:535714%09red/bta:327707%09red
Maturity onset diabetes of the young	KEGG PATHWAY	bta04950	1	25	0.912023	1	100534656	http://www.genome.jp/kegg-bin/show_pathway?bta04950/bta:509200%09red
Dilated cardiomyopathy	KEGG PATHWAY	bta05414	5	86	0.917338	1	101102411|101122427|443209|443318|101115445	http://www.genome.jp/kegg-bin/show_pathway?bta05414/bta:286800%09red/bta:281239%09red/bta:281793%09red/bta:282644%09red/bta:506953%09red
Signaling pathways regulating pluripotency of stem cells	KEGG PATHWAY	bta04550	9	139	0.919709	1	101109531|101119286|443318|100302636|443447|101110180|541604|101111867|443515	http://www.genome.jp/kegg-bin/show_pathway?bta04550/bta:281239%09red/bta:530430%09red/bta:511077%09red/bta:536380%09red/bta:525135%09red/bta:281848%09red/bta:614040%09red/bta:280840%09red/bta:520842%09red
GnRH signaling pathway	KEGG PATHWAY	bta04912	5	87	0.921783	1	100216465|101106906|114109674|101102411|101118870	http://www.genome.jp/kegg-bin/show_pathway?bta04912/bta:281879%09red/bta:281793%09red/bta:541008%09red/bta:525416%09red/bta:509107%09red
Cell cycle	KEGG PATHWAY	bta04110	8	127	0.922674	1	114108593|101115240|443447|101110906|100147799|101105870|101109224|100302083	http://www.genome.jp/kegg-bin/show_pathway?bta04110/bta:505691%09red/bta:534579%09red/bta:513497%09red/bta:505463%09red/bta:615414%09red/bta:615427%09red/bta:511077%09red/bta:520428%09red
Melanogenesis	KEGG PATHWAY	bta04916	6	101	0.923744	1	101109531|101102411|106991715|101118870|101113882|100034666	http://www.genome.jp/kegg-bin/show_pathway?bta04916/bta:525135%09red/bta:282105%09red/bta:281791%09red/bta:281793%09red/bta:525416%09red/bta:513105%09red
Endocrine and other factor-regulated calcium reabsorption	KEGG PATHWAY	bta04961	2	44	0.925343	1	101122460|101102411	http://www.genome.jp/kegg-bin/show_pathway?bta04961/bta:281793%09red/bta:536553%09red
Pyrimidine metabolism	KEGG PATHWAY	bta00240	6	102	0.927625	1	101106892|101111182|101121885|101114471|101103555|101116826	http://www.genome.jp/kegg-bin/show_pathway?bta00240/bta:534232%09red/bta:512971%09red/bta:509965%09red/bta:767843%09red/bta:282389%09red/bta:506087%09red
Focal adhesion	KEGG PATHWAY	bta04510	14	206	0.933063	1	443209|101114569|101111424|101110137|443318|101115445|101115211|443515|443103|100147799|101112600|443076|101118337|101113847	http://www.genome.jp/kegg-bin/show_pathway?bta04510/bta:515718%09red/bta:280855%09red/bta:281239%09red/bta:282644%09red/bta:541281%09red/bta:540664%09red/bta:531254%09red/bta:281572%09red/bta:533455%09red/bta:281848%09red/bta:530102%09red/bta:613787%09red/bta:506953%09red/bta:615414%09red
Inositol phosphate metabolism	KEGG PATHWAY	bta00562	3	62	0.937311	1	101105703|101105968|101106176	http://www.genome.jp/kegg-bin/show_pathway?bta00562/bta:327692%09red/bta:511124%09red/bta:519037%09red
Inflammatory mediator regulation of TRP channels	KEGG PATHWAY	bta04750	6	105	0.938243	1	101113830|101102411|443318|101120341|101118870|114109674	http://www.genome.jp/kegg-bin/show_pathway?bta04750/bta:281239%09red/bta:100848162%09red/bta:281879%09red/bta:281793%09red/bta:525416%09red/bta:617930%09red
Leukocyte transendothelial migration	KEGG PATHWAY	bta04670	7	119	0.939817	1	101106906|101112563|101110137|780477|106991715|101106452|101121501	http://www.genome.jp/kegg-bin/show_pathway?bta04670/bta:515718%09red/bta:541008%09red/bta:526848%09red/bta:281791%09red/bta:414921%09red/bta:281111%09red/bta:281839%09red
Adrenergic signaling in cardiomyocytes	KEGG PATHWAY	bta04261	9	146	0.941579	1	114117324|101107087|101102411|101118870|106991715|101102015|101122427|101113882|100216465	http://www.genome.jp/kegg-bin/show_pathway?bta04261/bta:281791%09red/bta:767949%09red/bta:509107%09red/bta:286800%09red/bta:505757%09red/bta:281793%09red/bta:282146%09red/bta:525416%09red/bta:513105%09red
Type II diabetes mellitus	KEGG PATHWAY	bta04930	2	48	0.944999	1	101122774|100294595	http://www.genome.jp/kegg-bin/show_pathway?bta04930/bta:282410%09red/bta:282081%09red
TGF-beta signaling pathway	KEGG PATHWAY	bta04350	4	79	0.94539	1	443447|114108593|101119286|101105870	http://www.genome.jp/kegg-bin/show_pathway?bta04350/bta:534579%09red/bta:530430%09red/bta:511077%09red/bta:615427%09red
Chemokine signaling pathway	KEGG PATHWAY	bta04062	12	188	0.949708	1	678679|101106906|101111100|101110137|101115290|101108750|106991715|101113847|101114097|100192421|101113771|101114628	http://www.genome.jp/kegg-bin/show_pathway?bta04062/bta:515718%09red/bta:786204%09red/bta:541008%09red/bta:533455%09red/bta:616364%09red/bta:516104%09red/bta:616732%09red/bta:281791%09red/bta:615986%09red/bta:511674%09red/bta:281796%09red/bta:511812%09red
Colorectal cancer	KEGG PATHWAY	bta05210	3	66	0.952245	1	443447|106990092|443218	http://www.genome.jp/kegg-bin/show_pathway?bta05210/bta:100850794%09red/bta:280795%09red/bta:511077%09red
TNF signaling pathway	KEGG PATHWAY	bta04668	6	110	0.952885	1	101113882|101112563|443218|101110180|100216465|100294595	http://www.genome.jp/kegg-bin/show_pathway?bta04668/bta:282081%09red/bta:509107%09red/bta:280795%09red/bta:280840%09red/bta:281839%09red/bta:513105%09red
Hedgehog signaling pathway	KEGG PATHWAY	bta04340	2	51	0.956394	1	101109531|101111396	http://www.genome.jp/kegg-bin/show_pathway?bta04340/bta:525135%09red/bta:540830%09red
Salmonella infection	KEGG PATHWAY	bta05132	4	83	0.957497	1	101104595|101113771|443218|101118013	http://www.genome.jp/kegg-bin/show_pathway?bta05132/bta:616364%09red/bta:280795%09red/bta:512242%09red/bta:613724%09red
Platelet activation	KEGG PATHWAY	bta04611	7	126	0.958078	1	101114407|101123066|101102411|106991715|101104339|114109674|101114569	http://www.genome.jp/kegg-bin/show_pathway?bta04611/bta:531254%09red/bta:281879%09red/bta:281791%09red/bta:281793%09red/bta:281963%09red/bta:100336616%09red/bta:613600%09red
Prion diseases	KEGG PATHWAY	bta05020	1	33	0.958376	1	443547	http://www.genome.jp/kegg-bin/show_pathway?bta05020/bta:407125%09red
Base excision repair	KEGG PATHWAY	bta03410	1	33	0.958376	1	101118667	http://www.genome.jp/kegg-bin/show_pathway?bta03410/bta:444987%09red
Viral myocarditis	KEGG PATHWAY	bta05416	3	68	0.958398	1	106990092|101108696|101112563	http://www.genome.jp/kegg-bin/show_pathway?bta05416/bta:100850794%09red/bta:100848815%09red/bta:281839%09red
Oocyte meiosis	KEGG PATHWAY	bta04114	6	113	0.960087	1	114108593|443318|101118870|101102015|443515|114109674	http://www.genome.jp/kegg-bin/show_pathway?bta04114/bta:281239%09red/bta:281879%09red/bta:505757%09red/bta:281848%09red/bta:525416%09red/bta:615427%09red
Ribosome biogenesis in eukaryotes	KEGG PATHWAY	bta03008	4	85	0.962572	1	101103564|102238525|101111067|100302079	http://www.genome.jp/kegg-bin/show_pathway?bta03008/bta:540457%09red/bta:513237%09red/bta:520891%09red/bta:102216273%09red
Ras signaling pathway	KEGG PATHWAY	bta04014	15	234	0.963728	1	101112600|101120062|101109353|101120283|443318|101113847|105605991|443515|101107460|101114097|101105703|100192421|443076|443074|443103	http://www.genome.jp/kegg-bin/show_pathway?bta04014/bta:617915%09red/bta:280855%09red/bta:281239%09red/bta:533455%09red/bta:281572%09red/bta:614911%09red/bta:494318%09red/bta:506802%09red/bta:519037%09red/bta:281160%09red/bta:511812%09red/bta:281848%09red/bta:281796%09red/bta:613787%09red/bta:326285%09red
B cell receptor signaling pathway	KEGG PATHWAY	bta04662	3	71	0.966247	1	101110137|443218|443017	http://www.genome.jp/kegg-bin/show_pathway?bta04662/bta:515718%09red/bta:280795%09red/bta:407126%09red
Leishmaniasis	KEGG PATHWAY	bta05140	3	72	0.968537	1	101106452|101108696|443218	http://www.genome.jp/kegg-bin/show_pathway?bta05140/bta:280795%09red/bta:100848815%09red/bta:281111%09red
Primary immunodeficiency	KEGG PATHWAY	bta05340	1	36	0.968564	1	101106352	http://www.genome.jp/kegg-bin/show_pathway?bta05340/bta:280712%09red
Cytokine-cytokine receptor interaction	KEGG PATHWAY	bta04060	15	238	0.969212	1	780517|101102850|101117284|101111100|101108750|106991909|101111039|101119742|101110180|443103|678679|101120990|443076|101113771|443534	http://www.genome.jp/kegg-bin/show_pathway?bta04060/bta:616364%09red/bta:537922%09red/bta:281572%09red/bta:520341%09red/bta:614780%09red/bta:516104%09red/bta:616179%09red/bta:280855%09red/bta:784268%09red/bta:509585%09red/bta:615986%09red/bta:511674%09red/bta:504507%09red/bta:280836%09red/bta:280840%09red
Basal cell carcinoma	KEGG PATHWAY	bta05217	2	56	0.970532	1	101109531|101111396	http://www.genome.jp/kegg-bin/show_pathway?bta05217/bta:525135%09red/bta:540830%09red
Asthma	KEGG PATHWAY	bta05310	1	37	0.971372	1	101108696	http://www.genome.jp/kegg-bin/show_pathway?bta05310/bta:100848815%09red
Rap1 signaling pathway	KEGG PATHWAY	bta04015	13	214	0.971466	1	101114407|101109353|101102411|443318|106991715|443515|101107460|101119747|101105703|101112600|443076|443074|443103	http://www.genome.jp/kegg-bin/show_pathway?bta04015/bta:617915%09red/bta:280855%09red/bta:281239%09red/bta:281572%09red/bta:519037%09red/bta:281160%09red/bta:281791%09red/bta:281793%09red/bta:281848%09red/bta:281963%09red/bta:613787%09red/bta:282637%09red/bta:326285%09red
Hepatitis B	KEGG PATHWAY	bta05161	8	149	0.974121	1	101106906|101113882|443218|443447|106990092|101118617|100216465|100302083	http://www.genome.jp/kegg-bin/show_pathway?bta05161/bta:100850794%09red/bta:541008%09red/bta:788119%09red/bta:511077%09red/bta:509107%09red/bta:280795%09red/bta:513497%09red/bta:513105%09red
VEGF signaling pathway	KEGG PATHWAY	bta04370	2	58	0.974847	1	443103|101113847	http://www.genome.jp/kegg-bin/show_pathway?bta04370/bta:533455%09red/bta:281572%09red
Ubiquitin mediated proteolysis	KEGG PATHWAY	bta04120	7	138	0.978118	1	114108593|101114404|101116512|100302546|101122748|100294595|101107962	http://www.genome.jp/kegg-bin/show_pathway?bta04120/bta:616156%09red/bta:767894%09red/bta:282081%09red/bta:540733%09red/bta:510003%09red/bta:615427%09red/bta:525906%09red
Graft-versus-host disease	KEGG PATHWAY	bta05332	1	41	0.980311	1	101108696	http://www.genome.jp/kegg-bin/show_pathway?bta05332/bta:100848815%09red
Protein processing in endoplasmic reticulum	KEGG PATHWAY	bta04141	9	169	0.981165	1	114108593|114113077|101111605|101112732|101121123|101121537|100216465|105612995|101118089	http://www.genome.jp/kegg-bin/show_pathway?bta04141/bta:530610%09red/bta:507124%09red/bta:509107%09red/bta:100298456%09red/bta:613577%09red/bta:282216%09red/bta:533949%09red/bta:615427%09red/bta:615012%09red
Tuberculosis	KEGG PATHWAY	bta05152	10	183	0.981337	1	101108696|101104057|101114221|106990092|101118870|443424|101112054|101104595|100192432|101111081	http://www.genome.jp/kegg-bin/show_pathway?bta05152/bta:100850794%09red/bta:282167%09red/bta:512242%09red/bta:505684%09red/bta:518974%09red/bta:282229%09red/bta:317777%09red/bta:525416%09red/bta:100848815%09red/bta:517535%09red
Carbohydrate digestion and absorption	KEGG PATHWAY	bta04973	1	42	0.98207	1	101118831	http://www.genome.jp/kegg-bin/show_pathway?bta04973/bta:539383%09red
Pathways in cancer	KEGG PATHWAY	bta05200	21	329	0.982945	1	101114163|101109531|443218|101109353|101114404|101111396|100302102|101118553|443318|106990092|101111845|443447|101113436|443515|443103|443076|101119747|101121501|100302083|100135448|443074	http://www.genome.jp/kegg-bin/show_pathway?bta05200/bta:520260%09red/bta:100850794%09red/bta:281239%09red/bta:540830%09red/bta:281572%09red/bta:280855%09red/bta:509500%09red/bta:513497%09red/bta:282637%09red/bta:281677%09red/bta:789892%09red/bta:281160%09red/bta:534075%09red/bta:281848%09red/bta:526848%09red/bta:525135%09red/bta:533445%09red/bta:525906%09red/bta:280795%09red/bta:511077%09red/bta:…
Phosphatidylinositol signaling system	KEGG PATHWAY	bta04070	3	81	0.983473	1	101105703|101105968|114109674	http://www.genome.jp/kegg-bin/show_pathway?bta04070/bta:281879%09red/bta:511124%09red/bta:519037%09red
Jak-STAT signaling pathway	KEGG PATHWAY	bta04630	8	162	0.987176	1	101108025|101114404|443447|101110180|100147799|101106589|100294595|443534	http://www.genome.jp/kegg-bin/show_pathway?bta04630/bta:504593%09red/bta:511077%09red/bta:282081%09red/bta:616008%09red/bta:525906%09red/bta:280836%09red/bta:280840%09red/bta:615414%09red
Fc gamma R-mediated phagocytosis	KEGG PATHWAY	bta04666	3	86	0.988535	1	101110137|101120897|100192432	http://www.genome.jp/kegg-bin/show_pathway?bta04666/bta:515718%09red/bta:282229%09red/bta:523797%09red
Aminoacyl-tRNA biosynthesis	KEGG PATHWAY	bta00970	2	68	0.988734	1	101114460|101116327	http://www.genome.jp/kegg-bin/show_pathway?bta00970/bta:510933%09red/bta:506598%09red
Epstein-Barr virus infection	KEGG PATHWAY	bta05169	10	193	0.988804	1	101112563|100302079|101111182|443447|101114471|443017|101103555|101116826|101108368|100302083	http://www.genome.jp/kegg-bin/show_pathway?bta05169/bta:534232%09red/bta:512971%09red/bta:513497%09red/bta:535683%09red/bta:511077%09red/bta:767843%09red/bta:540457%09red/bta:281839%09red/bta:407126%09red/bta:506087%09red
Small cell lung cancer	KEGG PATHWAY	bta05222	3	87	0.98935	1	443447|106990092|101111845	http://www.genome.jp/kegg-bin/show_pathway?bta05222/bta:100850794%09red/bta:511077%09red/bta:509500%09red
Progesterone-mediated oocyte maturation	KEGG PATHWAY	bta04914	3	87	0.98935	1	443318|443515|106991715	http://www.genome.jp/kegg-bin/show_pathway?bta04914/bta:281791%09red/bta:281239%09red/bta:281848%09red
Hippo signaling pathway	KEGG PATHWAY	bta04390	7	151	0.989586	1	101116743|101109531|101109353|443447|100147799|101119747|101121501	http://www.genome.jp/kegg-bin/show_pathway?bta04390/bta:511077%09red/bta:526848%09red/bta:281160%09red/bta:525135%09red/bta:100137840%09red/bta:282637%09red/bta:615414%09red
Allograft rejection	KEGG PATHWAY	bta05330	1	48	0.989775	1	101108696	http://www.genome.jp/kegg-bin/show_pathway?bta05330/bta:100848815%09red
Notch signaling pathway	KEGG PATHWAY	bta04330	1	48	0.989775	1	101103554	http://www.genome.jp/kegg-bin/show_pathway?bta04330/bta:505267%09red
Inflammatory bowel disease (IBD)	KEGG PATHWAY	bta05321	2	70	0.990426	1	101119104|101108696	http://www.genome.jp/kegg-bin/show_pathway?bta05321/bta:100848815%09red/bta:527470%09red
Toll-like receptor signaling pathway	KEGG PATHWAY	bta04620	4	106	0.990754	1	101104595|101108750|101113771|443218	http://www.genome.jp/kegg-bin/show_pathway?bta04620/bta:516104%09red/bta:616364%09red/bta:280795%09red/bta:512242%09red
NF-kappa B signaling pathway	KEGG PATHWAY	bta04064	3	90	0.991474	1	101104595|780517|101112563	http://www.genome.jp/kegg-bin/show_pathway?bta04064/bta:281839%09red/bta:504507%09red/bta:512242%09red
Type I diabetes mellitus	KEGG PATHWAY	bta04940	1	51	0.992279	1	101108696	http://www.genome.jp/kegg-bin/show_pathway?bta04940/bta:100848815%09red
RNA degradation	KEGG PATHWAY	bta03018	2	74	0.993097	1	101121805|101112054	http://www.genome.jp/kegg-bin/show_pathway?bta03018/bta:513208%09red/bta:517535%09red
Antigen processing and presentation	KEGG PATHWAY	bta04612	2	74	0.993097	1	780470|101108696	http://www.genome.jp/kegg-bin/show_pathway?bta04612/bta:100848815%09red/bta:281105%09red
Pertussis	KEGG PATHWAY	bta05133	2	77	0.994607	1	443218|106991715	http://www.genome.jp/kegg-bin/show_pathway?bta05133/bta:281791%09red/bta:280795%09red
Non-small cell lung cancer	KEGG PATHWAY	bta05223	1	55	0.994691	1	101111845	http://www.genome.jp/kegg-bin/show_pathway?bta05223/bta:509500%09red
Chagas disease (American trypanosomiasis)	KEGG PATHWAY	bta05142	4	114	0.994709	1	101102411|443218|106991715|101113771	http://www.genome.jp/kegg-bin/show_pathway?bta05142/bta:281791%09red/bta:280795%09red/bta:281793%09red/bta:616364%09red
Natural killer cell mediated cytotoxicity	KEGG PATHWAY	bta04650	4	117	0.995721	1	101110137|101106906|101112563|101113847	http://www.genome.jp/kegg-bin/show_pathway?bta04650/bta:515718%09red/bta:281839%09red/bta:541008%09red/bta:533455%09red
Osteoclast differentiation	KEGG PATHWAY	bta04380	5	135	0.996029	1	101106452|101117101|100192432|100294595|443218	http://www.genome.jp/kegg-bin/show_pathway?bta04380/bta:540819%09red/bta:280795%09red/bta:281111%09red/bta:282081%09red/bta:282229%09red
HTLV-I infection	KEGG PATHWAY	bta05166	14	270	0.996149	1	101109224|101109531|101108696|443218|443547|100147799|443447|100302079|101118617|100216465|100126866|100302083|100147787|101112563	http://www.genome.jp/kegg-bin/show_pathway?bta05166/bta:505691%09red/bta:788119%09red/bta:513497%09red/bta:509107%09red/bta:511077%09red/bta:407125%09red/bta:525135%09red/bta:282478%09red/bta:280795%09red/bta:100848815%09red/bta:281839%09red/bta:540457%09red/bta:615414%09red/bta:518884%09red
Toxoplasmosis	KEGG PATHWAY	bta05145	4	119	0.996289	1	106990092|101111516|101108696|106991715	http://www.genome.jp/kegg-bin/show_pathway?bta05145/bta:100850794%09red/bta:281791%09red/bta:100848815%09red/bta:414346%09red
MAPK signaling pathway	KEGG PATHWAY	bta04010	13	259	0.996707	1	443218|101109353|101113222|101115240|101120161|443447|101122427|101122774|101120943|100216465|101121162|443074|101121024	http://www.genome.jp/kegg-bin/show_pathway?bta04010/bta:282410%09red/bta:507245%09red/bta:511077%09red/bta:536337%09red/bta:281160%09red/bta:286800%09red/bta:281296%09red/bta:505463%09red/bta:510245%09red/bta:528390%09red/bta:280795%09red/bta:509107%09red/bta:326285%09red
Autoimmune thyroid disease	KEGG PATHWAY	bta05320	1	61	0.996973	1	101108696	http://www.genome.jp/kegg-bin/show_pathway?bta05320/bta:100848815%09red
RNA transport	KEGG PATHWAY	bta03013	6	160	0.997746	1	101111426|101121147|101102857|101104786|100302079|101104960	http://www.genome.jp/kegg-bin/show_pathway?bta03013/bta:617236%09red/bta:509613%09red/bta:540457%09red/bta:504752%09red/bta:282220%09red/bta:515968%09red
T cell receptor signaling pathway	KEGG PATHWAY	bta04660	3	108	0.997827	1	101110137|443218|101114404	http://www.genome.jp/kegg-bin/show_pathway?bta04660/bta:515718%09red/bta:280795%09red/bta:525906%09red
Fc epsilon RI signaling pathway	KEGG PATHWAY	bta04664	1	66	0.998105	1	101110137	http://www.genome.jp/kegg-bin/show_pathway?bta04664/bta:515718%09red
Pancreatic cancer	KEGG PATHWAY	bta05212	1	66	0.998105	1	443103	http://www.genome.jp/kegg-bin/show_pathway?bta05212/bta:281572%09red
Thyroid hormone signaling pathway	KEGG PATHWAY	bta04919	3	112	0.998407	1	443447|101105703|101111845	http://www.genome.jp/kegg-bin/show_pathway?bta04919/bta:511077%09red/bta:509500%09red/bta:519037%09red
mRNA surveillance pathway	KEGG PATHWAY	bta03015	2	93	0.99858	1	101102015|101102321	http://www.genome.jp/kegg-bin/show_pathway?bta03015/bta:505757%09red/bta:505542%09red
Influenza A	KEGG PATHWAY	bta05164	6	175	0.999172	1	101108696|106990092|101112066|101116705|100294595|101112563	http://www.genome.jp/kegg-bin/show_pathway?bta05164/bta:100850794%09red/bta:282081%09red/bta:280897%09red/bta:507054%09red/bta:100848815%09red/bta:281839%09red
Alcoholism	KEGG PATHWAY	bta05034	9	224	0.999175	1	101117101|101113882|101102411|106991715|101113847|101114097|100216465|100192421|101102915	http://www.genome.jp/kegg-bin/show_pathway?bta05034/bta:540819%09red/bta:533455%09red/bta:511812%09red/bta:509107%09red/bta:281791%09red/bta:281793%09red/bta:281796%09red/bta:535158%09red/bta:513105%09red
Herpes simplex infection	KEGG PATHWAY	bta05168	7	193	0.999237	1	114108593|101108696|443218|106990092|100294595|100125623|101107962	http://www.genome.jp/kegg-bin/show_pathway?bta05168/bta:100850794%09red/bta:616156%09red/bta:282081%09red/bta:615427%09red/bta:614154%09red/bta:280795%09red/bta:100848815%09red
RIG-I-like receptor signaling pathway	KEGG PATHWAY	bta04622	1	77	0.999324	1	101103677	http://www.genome.jp/kegg-bin/show_pathway?bta04622/bta:767932%09red
Neurotrophin signaling pathway	KEGG PATHWAY	bta04722	3	124	0.99938	1	100216465|101118870|101113847	http://www.genome.jp/kegg-bin/show_pathway?bta04722/bta:533455%09red/bta:525416%09red/bta:509107%09red
Tight junction	KEGG PATHWAY	bta04530	3	132	0.999672	1	101121501|780477|106991715	http://www.genome.jp/kegg-bin/show_pathway?bta04530/bta:281791%09red/bta:526848%09red/bta:414921%09red
Hepatitis C	KEGG PATHWAY	bta05160	3	135	0.999742	1	100302083|100294595|780477	http://www.genome.jp/kegg-bin/show_pathway?bta05160/bta:513497%09red/bta:282081%09red/bta:414921%09red
Regulation of actin cytoskeleton	KEGG PATHWAY	bta04810	7	212	0.999785	1	101121750|443209|101109353|101110137|101115445|101112600|443074	http://www.genome.jp/kegg-bin/show_pathway?bta04810/bta:515718%09red/bta:281160%09red/bta:282644%09red/bta:100137883%09red/bta:613787%09red/bta:506953%09red/bta:326285%09red
MicroRNAs in cancer	KEGG PATHWAY	bta05206	9	247	0.999805	1	101103364|101119213|443076|443447|101115193|443103|100147799|100302083|101118337	http://www.genome.jp/kegg-bin/show_pathway?bta05206/bta:280855%09red/bta:535183%09red/bta:540664%09red/bta:281572%09red/bta:513497%09red/bta:281671%09red/bta:534323%09red/bta:511077%09red/bta:615414%09red
Amoebiasis	KEGG PATHWAY	bta05146	2	117	0.999816	1	101102411|101114569	http://www.genome.jp/kegg-bin/show_pathway?bta05146/bta:281793%09red/bta:531254%09red
Measles	KEGG PATHWAY	bta05162	3	140	0.999828	1	100302546|100192432|100147799	http://www.genome.jp/kegg-bin/show_pathway?bta05162/bta:282229%09red/bta:615414%09red/bta:540733%09red
Hematopoietic cell lineage	KEGG PATHWAY	bta04640	1	94	0.999863	1	443017	http://www.genome.jp/kegg-bin/show_pathway?bta04640/bta:407126%09red
Endocytosis	KEGG PATHWAY	bta04144	6	217	0.999957	1	101114404|101122748|443515|101122460|101120897|443076	http://www.genome.jp/kegg-bin/show_pathway?bta04144/bta:280855%09red/bta:523797%09red/bta:510003%09red/bta:525906%09red/bta:536553%09red/bta:281848%09red
Viral carcinogenesis	KEGG PATHWAY	bta05203	4	246	1	1	100302083|100216465|101113882|100147799	http://www.genome.jp/kegg-bin/show_pathway?bta05203/bta:513497%09red/bta:615414%09red/bta:513105%09red/bta:509107%09red
Systemic lupus erythematosus	KEGG PATHWAY	bta05322	1	185	1	1	101108696	http://www.genome.jp/kegg-bin/show_pathway?bta05322/bta:100848815%09red
Olfactory transduction	KEGG PATHWAY	bta04740	2	897	1	1	101118870|101113975	http://www.genome.jp/kegg-bin/show_pathway?bta04740/bta:525416%09red/bta:530601%09red
--------------------
#Term	Database	ID	Input number	Background number	P-Value	Corrected P-Value	Input	Hyperlink
--------------------
#Term	Database	ID	Input number	Background number	P-Value	Corrected P-Value	Input	Hyperlink
--------------------
