# Supplementary material for: Transcriptome sequencing unveils a novel mechanism underlying breed distinctions between thin- and fat-tailed sheep
Source: Research Square preprint supplement (doi:10.21203/rs.3.rs-6146587/v1), 2025-03-06
Supplement: Supplementary file 3 [file acb5a15e0d39f141c8752f03.xlsx]

## Sheet: SFKvsCSH.DE
sRNA	SFK_readcount	CSH_readcount	log2FoldChange	pval	padj
novel_107	45.1134	162.445	-1.84459	0.0123581	0.560235
novel_144	20.2064	3.12275	2.76159	0.00610895	0.415409
novel_182	0	6.96655	-5.36268	0.00413083	0.415409
novel_398	23527	46402.4	-0.979862	0.0303056	0.686928
novel_406	0.612155	9.05921	-3.92262	0.0271637	0.671683
novel_407	0.306107	6.35746	-4.30603	0.0243024	0.661025
novel_422	21.2862	4.17151	2.42117	0.021199	0.661025
novel_46	977.019	1825.18	-0.901243	0.0236111	0.661025
novel_51	831.172	2141.95	-1.36548	0.00509479	0.415409
novel_67	512.966	945.818	-0.882025	0.0343566	0.703529
novel_96	119.578	357.664	-1.57779	0.00186806	0.415409
oar-miR-107	658.874	341.326	0.949694	0.0148908	0.578612
oar-miR-143	3.66342e+06	7.10378e+06	-0.955397	0.0362111	0.703529
oar-miR-218a	2290.14	975.962	1.22948	0.00904807	0.492215
oar-miR-543-3p	28.7459	70.483	-1.29455	0.0443866	0.804878

## Sheet: HUSvsSFK.DE
sRNA	HUS_readcount	SFK_readcount	log2FoldChange	pval	padj
novel_107	187.477	47.2315	1.98853	0.00746145	0.187893
novel_120	86.1994	14.2946	2.58611	3.86628e-05	0.0053548
novel_171	17.2933	5.6363	1.6356	0.0463223	0.740653
novel_328	2.78049	13.6254	-2.30841	0.0265578	0.497167
novel_351	30.7494	81.3113	-1.41142	0.0269224	0.497167
novel_381	0	31.7671	-7.39026	1.39489e-05	0.00386385
novel_401	37.9895	14.1001	1.42235	0.0236778	0.497167
novel_406	26.064	0.644638	5.35092	0.0017767	0.086712
novel_407	12.0195	0.318224	5.13545	0.00435234	0.133955
novel_422	1.7961	22.2947	-3.5495	0.00187824	0.086712
novel_440	421.64	178.343	1.24132	0.0069606	0.187893
novel_51	1537.57	871.72	0.819063	0.0169613	0.391524
novel_64	365.942	815.373	-1.15671	0.00306147	0.121147
novel_72	1006.42	362.655	1.47264	0.000182182	0.0168215
novel_85	568.258	190.122	1.57979	0.00104095	0.0720861
oar-miR-200c	13.5531	131.778	-3.28781	0.0041457	0.133955
oar-miR-3958-3p	1634.37	1030.29	0.665885	0.0340723	0.589876

## Sheet: HUSvsCSH.DE
sRNA	HUS_readcount	CSH_readcount	log2FoldChange	pval	padj
novel_120	81.1269	18.2559	2.11365	0.019041	0.717226
novel_144	32.5058	2.95465	3.51578	0.000415888	0.116033
novel_171	16.1454	3.22204	2.36105	0.0243882	0.756034
novel_182	0	6.63064	-5.22034	0.00814108	0.37856
novel_401	35.5572	12.7314	1.45868	0.0479828	0.974365
novel_440	401.442	153.372	1.38226	0.0370293	0.939198
novel_64	340.995	1378.2	-2.01492	0.00149423	0.138964
novel_72	942.355	350.539	1.42563	0.00335153	0.233769
novel_74	738.919	269.494	1.45397	0.0205656	0.717226
novel_96	117.384	339.462	-1.52935	0.00608117	0.339329
oar-miR-200c	12.5523	50.1763	-1.9988	0.034228	0.939198
oar-miR-218a	3513.56	939.593	1.90225	0.0009257	0.129135
oar-miR-30a-5p	286156	120173	1.25168	0.0491049	0.974365
