# Supplementary material for: Transcriptome sequencing unveils a novel mechanism underlying breed distinctions between thin- and fat-tailed sheep
Source: Research Square preprint supplement (doi:10.21203/rs.3.rs-6146587/v1), 2025-03-06
Supplement: Supplementary file 4 [file d46d06e05bbeeb72d75a21c3.xlsx]

## Sheet: HUS vs CSH
gene_id	gene_name	gene_locus	HUS_FPKM	CSH_FPKM	log2FoldChange	pvalue	padj
101111081	PLA2R1	NC_056055.1:149665404-149793734	74.2686	7.50596	3.57308	8.62476e-17	7.21087e-13
101122618	NNAT	NC_056066.1:66440928-66452531	4.36159	185.626	-4.99631	1.05134e-13	5.27393e-10
101109781	CSRNP3	NC_056055.1:143879600-144090253	0.073817	1.36518	-4.08889	2.00461e-13	8.37994e-10
100620053	KCNMB2	NC_056054.1:208923190-209171155	0.0984327	0	13.4117	3.72037e-13	1.33306e-09
101122666	B3GALT1	NC_056055.1:141550150-142172431	0.043846	0	13.4736	1.57743e-12	4.39611e-09
101120795	FYB2	NC_056054.1:31269615-31402196	3.48685	0.0647783	5.96942	7.8276e-12	1.78483e-08
101106522	TRPC7	NC_056058.1:45278881-45428855	0.328436	0	12.9469	2.44725e-11	5.11517e-08
105604608	HS3ST6	NC_056077.1:2009163-2015314	2.08923	32.4975	-3.81907	3.03363e-10	5.85305e-07
100147799	CCND2	NC_056056.1:211598275-211621095	15.8604	109.666	-2.70562	9.55331e-10	1.71154e-06
443054	GSTA1-1	NC_056073.1:24748145-24761908	288.463	17.0147	4.29853	2.83113e-09	4.73403e-06
101119692	HS3ST4	NC_056077.1:23821410-24302416	0	0.556936	-16.5902	3.96792e-09	6.22021e-06
101104729	PPFIA2	NC_056056.1:117319666-117828677	0	0.0210543	-11.8493	8.38679e-09	1.22992e-05
101107121	SGK2	NC_056066.1:72131680-72152569	20.5818	1.11849	4.4263	8.82645e-09	1.22992e-05
101123575	HSD17B14	NC_056067.1:55170303-55189408	15.1978	0.718088	4.59803	1.02686e-08	1.23017e-05
101107837	SLC44A5	NC_056054.1:51432373-51659818	0.071019	0	12.6256	1.02996e-08	1.23017e-05
101105294	LGI1	NC_056075.1:14840801-14877030	0.031592	5.29985	-7.2449	1.32261e-08	1.50789e-05
101123289	LOC101123289	NC_056057.1:67136545-67140914	14.2268	0.226584	6.1749	1.8665e-08	2.03546e-05
101111288	CA12	NC_056060.1:44842836-44907905	31.0892	0.658559	5.87797	3.07901e-08	3.21783e-05
100337686	PON3	NC_056057.1:13363165-13398936	5.43647	0.45318	3.82349	3.31978e-08	3.33067e-05
101119652	GRTP1	NC_056063.1:85941202-85960285	5.54473	0.186764	5.06965	4.06149e-08	3.77298e-05
101116376	KLKB1	NC_056079.1:15452076-15474273	8.08135	1.01898	2.94856	5.08942e-08	4.55903e-05
101109484	GLRB	NC_056070.1:42220953-42315769	0.0996963	0	11.9275	5.6079e-08	4.75683e-05
101109916	TGM5	NC_056071.1:52825720-52856534	6.94597	0.011975	9.47938	5.97987e-08	4.8383e-05
101107119	LOC101107119	NC_056066.1:42841301-42858263	280.568	9.02823	5.14065	1.05686e-07	7.79652e-05
101106297	CPN2	NC_056054.1:194001738-194010772	13.2381	0.064036	7.92054	1.50795e-07	0.000108064
100534643	UGT1A6	NC_056054.1:7254898-7413990	0.551688	0	15.219	2.10854e-07	0.000139402
101119997	SCPEP1	NC_056064.1:7518442-7540656	175.215	51.8543	1.89695	3.28992e-07	0.000206295
101111412	SLC15A2	NC_056054.1:187200109-187242730	3.51788	0.092919	5.45074	4.6151e-07	0.000282332
101120284	ADAMTS15	NC_056074.1:33918474-33943159	4.4136	22.0979	-2.23544	5.63217e-07	0.000336348
101113460	FBP2	NC_056055.1:31846746-31897446	8.38157	0.532782	4.20187	6.33456e-07	0.000361099
101115172	LOC101115172	NC_056054.1:269001773-269028730	239.5	22.2032	3.74446	9.98435e-07	0.000524289
101104112	BDH1	NC_056054.1:192783700-192821650	19.2135	1.18531	4.27725	1.00488e-06	0.000524289
106991715	GNAZ	NC_056070.1:71868761-71898845	4.7946	0.648299	3.08069	1.02425e-06	0.000524289
101117611	TOX3	NC_056067.1:20423244-20543404	0	0.0487183	-11.0078	1.06903e-06	0.000527067
101113789	ACAD8	NC_056068.1:82093418-82109027	56.5472	11.3012	2.52361	1.0717e-06	0.000527067
101112027	LINGO2	NC_056055.1:96720020-98236892	0.0195043	0	13.4716	1.24818e-06	0.000602054
105606344	HRK	NC_056070.1:58193159-58216924	1.35464	0.0548807	4.85568	1.7775e-06	0.000833016
554321	LTF	NC_056072.1:52949688-52979789	7.64433	0.291779	4.93056	1.88838e-06	0.000861171
101121501	CTNNA2	NC_056056.1:50614437-52019005	0	0.0189813	-13.2634	1.96029e-06	0.000877999
101106322	CNTNAP2	NC_056057.1:110539864-112881563	0.435368	0.0854953	2.95818	2.14141e-06	0.000928901
101116157	LOC101116157	NC_056064.1:26786573-26790122	35.1334	256.182	-2.77016	2.16085e-06	0.000928901
XLOC_041294	XLOC_041294	NC_056057.1:67153027-67157400	4.63899	0.012924	8.67957	2.18504e-06	0.000928901
101108742	GRM8	NC_056057.1:92332518-93226109	0.529061	0.0613677	3.09267	2.55305e-06	0.00106726
101123470	UNC13C	NC_056060.1:53791928-54498557	0.0393723	0.482459	-3.48246	2.66919e-06	0.00108915
443218	FOS	NC_056060.1:84571490-84574889	3.9821	53.0609	-3.62946	2.70597e-06	0.00108915
101111700	SFXN5	NC_056056.1:94962557-95088775	64.7253	8.57978	3.16664	2.73568e-06	0.00108915
101109822	GPT2	NC_056067.1:14860042-14894080	23.0641	2.25106	3.61848	2.86716e-06	0.00112366
101113771	LOC101113771	NC_056064.1:13946762-13985385	0.203988	0	10.7614	3.14005e-06	0.00118083
101112583	GAS2L2	NC_056064.1:14347925-14355711	0.410944	6.40314	-3.84017	3.15607e-06	0.00118083
114118764	NKD2	NC_056069.1:71357167-71375220	79.4856	8.10402	3.44404	3.20136e-06	0.00118083
101112454	CCDC148	NC_056055.1:150996807-151566213	0.0274627	0.487204	-3.96756	3.6354e-06	0.00130261
101115925	IGF2BP2	NC_056054.1:202185501-202349278	0.214491	1.18585	-2.34631	3.73275e-06	0.00131345
101108515	ELOVL7	NC_056069.1:18629708-18711128	10.8506	3.37384	1.85767	3.82274e-06	0.00131345
100170327	FASN	NC_056064.1:50277417-50296144	906.849	66.3582	4.0137	4.11623e-06	0.00139338
443450	BCAT2	NC_056067.1:55155036-55168365	49.9088	8.76803	2.73146	4.16646e-06	0.00139338
101110189	LOC101110189	NC_056074.1:15572513-15577058	1948.25	206.704	3.46772	4.3031e-06	0.00142014
101112261	DEPDC1B	NC_056069.1:18737332-18837910	1.42878	0.165369	3.30245	5.07905e-06	0.00163324
101102469	GCAT	NC_056056.1:215451555-215458241	60.2427	9.23637	2.92683	5.16301e-06	0.00163922
101120341	LOC101120341	NC_056064.1:16681913-16977277	0	0.106113	-13.5739	5.65479e-06	0.00172449
114114861	SNCB	NC_056058.1:35804873-35822527	1.93169	0	13.6607	5.70659e-06	0.00172449
101115141	SCCPDH	NC_056065.1:29856498-29885662	37.235	12.8068	1.68387	5.87443e-06	0.00173344
100642179	SLC22A3	NC_056061.1:84215939-84315416	7.08497	1.53703	2.37765	6.1097e-06	0.0017819
101102549	LOC101102549	NC_056060.1:84949518-84964352	12.9783	0.37281	5.18519	6.18529e-06	0.00178321
101116336	LOC101116336	NC_056067.1:23441533-23469387	920.723	157.991	2.74389	6.94812e-06	0.00198037
101111328	PHGDH	NC_056054.1:97076507-97107600	10.3161	1.64658	2.8195	9.13253e-06	0.00249883
442993	UGT1A9	NC_056054.1:7254899-7426072	1.46435	0.187787	3.15874	9.3241e-06	0.0025147
443343	ALDH1A1	NC_056055.1:63749292-63804375	383.051	85.2905	2.3471	9.46192e-06	0.00252472
101118819	P2RX6	NC_056070.1:72394856-72408222	7.50879	0.394963	4.03578	1.13467e-05	0.00293287
101111038	EPHX1	NC_056065.1:28122842-28160799	147.852	50.6911	1.74227	1.14593e-05	0.00293287
101118069	CDH20	NC_056076.1:60200349-60416373	0.0530003	1.18633	-4.31455	1.22482e-05	0.00310312
XLOC_037452	XLOC_037452	NC_056056.1:148826598-148973511	1.79827	0.052931	6.63869	1.31681e-05	0.00330282
114110822	LOC114110822	NC_056054.1:232156805-232159213	0.248085	6.43845	-4.53543	1.40721e-05	0.00346035
101111182	POLR3H	NC_056056.1:218441109-218452403	19.2146	4.28114	2.39043	1.66597e-05	0.00401787
101104361	APOD	NC_056054.1:192885544-192898072	100.079	10.7075	3.41239	1.81224e-05	0.00428817
101103834	FTL	NC_056067.1:55282352-55283924	243.412	81.3228	1.70229	2.02515e-05	0.00464758
101103359	CDHR5	NC_056074.1:47067072-47073733	7.40277	0.308457	4.74427	2.05376e-05	0.00464758
101111910	SEC14L3	NC_056070.1:69433192-69442788	7.28093	0.648546	3.70342	2.05498e-05	0.00464758
101108960	DNAH12	NC_056072.1:43748189-43925231	0.648829	0.0476227	3.99388	2.05678e-05	0.00464758
101113084	DNAI2	NC_056064.1:56390266-56422239	0	0.080528	-9.97825	2.24714e-05	0.00498785
443186	ACACA	NC_056064.1:13136279-13424653	338.975	49.0479	3.08575	2.58287e-05	0.00563334
101104068	SRP19	NC_056060.1:1088592-1097059	38.5993	12.996	1.76158	2.72297e-05	0.00588773
101118685	GYS2	NC_056056.1:194179177-194237178	0.975272	0.00333167	8.00671	2.92503e-05	0.00627057
101119329	SELENOW	NC_056067.1:54431829-54435844	196.51	47.3653	2.24586	2.97733e-05	0.00632859
101110627	GADL1	NC_056072.1:5258457-5449678	0.0473367	0	12.0023	3.15199e-05	0.00653748
101118932	LOC101118932	NC_056055.1:230096382-230293345	0.011287	0	9.83371	3.15379e-05	0.00653748
101118075	NR1I2	NC_056054.1:185462876-185495197	0.585559	0.00251333	7.92092	3.24913e-05	0.00662667
101115040	DECR1	NC_056062.1:86594921-86635751	85.5114	19.7392	2.34602	3.43383e-05	0.00689763
101105005	VNN1	NC_056061.1:58139248-58166116	10.5434	2.64849	2.19455	3.50232e-05	0.00693794
101114353	BSG	NC_056058.1:40882060-40888873	565.462	126.445	2.36469	3.51295e-05	0.00693794
101118419	FRZB	NC_056055.1:126892993-126926153	17.09	2.01364	3.30725	3.5605e-05	0.00693795
101103031	AK4	NC_056054.1:40740898-40835953	89.6021	10.817	3.30856	3.71644e-05	0.0071157
121820546	LOC121820546	NC_056064.1:13136200-13380448	23.6759	3.53689	3.10051	3.85089e-05	0.00726226
101105536	SLC6A11	NC_056072.1:54821864-54945658	0.0657603	0	11.7321	4.00539e-05	0.00746993
101103225	REEP1	NC_056056.1:58112757-58248157	4.74196	1.10059	2.29618	4.02057e-05	0.00746993
101109144	SLC25A36	NC_056054.1:248587768-248621891	143.217	31.0898	2.42824	4.2186e-05	0.00772343
101109923	NDUFC2	NC_056074.1:15563020-15577194	86.1352	53.7266	2.37305	4.28367e-05	0.00778572
101108999	FABP1	NC_056056.1:58827701-58833417	0	0.505806	-10.136	4.45857e-05	0.00804531
101119742	TNFRSF9	NC_056065.1:44799276-44820991	1.67981	0.0928813	4.31733	4.80138e-05	0.00854101
101121875	BCO1	NC_056067.1:7385651-7415199	2.19115	0.137114	4.23794	4.84189e-05	0.00855241
101104446	IGSF11	NC_056054.1:184631957-184768768	0.0711597	0	11.8357	4.94035e-05	0.00861265
443185	SCD	NC_056075.1:21026048-21041247	3175.09	567.429	2.77049	5.16166e-05	0.00892861
101114271	UGDH	NC_056059.1:59319017-59353380	21.0779	82.9501	-1.84035	5.21572e-05	0.00896033
101121624	CNTN5	NC_056068.1:8449512-10112326	0.00433133	0	11.5422	5.35747e-05	0.00914123
101119821	PPM1K	NC_056059.1:37115160-37139254	118.567	26.3748	2.39417	5.53244e-05	0.00925098
101109070	ADGRG2	NC_056080.1:17231098-17362284	0.139643	0.736709	-2.259	5.68576e-05	0.00926218
101119703	DNER	NC_056055.1:231387211-231765997	0.0209447	0	11.5788	6.10958e-05	0.0098231
101114126	ACSS2	NC_056066.1:64181303-64224335	728.759	101.399	3.07194	6.55851e-05	0.0102143
101116033	MBOAT2	NC_056056.1:18338394-18446293	12.0917	3.42489	2.02738	6.56477e-05	0.0102143
101106878	PRR5L	NC_056068.1:65661102-65739196	5.3313	30.791	-2.45913	6.5989e-05	0.0102143
101104971	FNDC5	NC_056055.1:234791107-234799134	6.70087	0.636118	3.58331	6.69671e-05	0.0102419
101104386	GALNT14	NC_056056.1:37723331-37943242	0.533247	0.115541	2.36692	6.96024e-05	0.0105804
101114051	THYN1	NC_056068.1:82088952-82109023	42.9619	13.1988	1.93739	7.04273e-05	0.0106413
101104026	S100A8	NC_056054.1:103770088-103771068	137.535	5.65205	4.72059	7.26657e-05	0.0108637
443017	CR2	NC_056065.1:5284060-5347332	2.49442	10.8009	-2.01314	7.41945e-05	0.0110115
101115919	KCND3	NC_056054.1:89194925-89416362	11.4332	1.28888	3.3783	7.62282e-05	0.0112468
101104497	PRTG	NC_056060.1:52770524-52917182	0.00715267	0.127983	-4.01129	8.02535e-05	0.0116026
101107575	SLC4A10	NC_056055.1:147865614-148213522	0.150103	0.0119983	3.74866	8.04898e-05	0.0116026
101120391	TFPI	NC_056055.1:121882150-121970317	1.29798	0.339155	2.04543	8.33952e-05	0.0119527
101108195	LYPD1	NC_056055.1:178329818-178388363	2.81436	0.379509	3.06164	8.68216e-05	0.0122675
101118870	CAMK2B	NC_056057.1:78676828-78767627	0.344765	0.014252	4.73915	8.70591e-05	0.0122675
101106941	FGFBP1	NC_056059.1:111950825-111953834	0.805963	0	10.1294	9.0996e-05	0.0126097
101111867	ACVR1C	NC_056055.1:152156739-152216366	21.6367	79.085	-1.71723	9.23493e-05	0.0127269
101103695	EPHA6	NC_056054.1:161982528-162958772	0.560644	0.141753	2.04079	0.000101801	0.0138021
106990096	LOC106990096	NC_056065.1:5750385-5864667	25.9021	10.135	1.50432	0.000103917	0.0140131
101121385	LOC101121385	NC_056054.1:85691465-85775392	0	0.0204223	-9.3743	0.000105934	0.0142088
101117229	LOC101117229	NC_056077.1:35936362-35970542	27.1149	5.01604	2.47349	0.000110482	0.0145631
101112113	PTGR1	NC_056055.1:11930846-11961643	107.086	40.4006	1.5861	0.000110898	0.0145631
101118121	ODAD2	NC_056066.1:36005480-36175612	0.949672	0.179311	2.45837	0.000115392	0.0150743
101113943	ADHFE1	NC_056062.1:43659771-43692926	16.9968	3.10991	2.68006	0.000123097	0.0159975
100534656	HNF4A	NC_056066.1:72742413-72809128	19.7624	5.45512	2.0367	0.000128017	0.0164813
101113743	PLEKHG7	NC_056056.1:129075938-129158031	0	0.0202337	-9.32174	0.000128134	0.0164813
101114544	GSS	NC_056066.1:64224970-64249601	13.2116	3.60085	2.13803	0.000131288	0.0168009
100415773	ADAMTS1	NC_056054.1:130174835-130184286	6.83788	27.8093	-1.94346	0.000133801	0.0170355
101117223	RNF128	NC_056080.1:128564748-128662922	2.99853	0.730722	2.24539	0.000137194	0.0173793
101111767	CTBS	NC_056054.1:61601200-61613882	10.3081	0.917521	3.73404	0.000139817	0.0176204
101111065	MASP1	NC_056054.1:200802630-200867328	14.6059	2.73241	2.62184	0.000141205	0.0176204
101105358	LOC101105358	NC_056069.1:14972125-15082051	1.54156	0.305055	2.54734	0.000145983	0.0180372
101107605	LTBP2	NC_056060.1:83873808-83984376	5.1363	26.937	-2.26696	0.000150854	0.0185476
101112867	ECHS1	NC_056075.1:51214799-51223427	396.252	122.859	1.89734	0.000155893	0.0190737
101120972	GPAM	NC_056075.1:32219904-32288784	330.696	38.7683	3.30763	0.000162458	0.0194965
101103641	AKR1D1	NC_056057.1:103217229-103269171	0.125205	0	11.5753	0.00017353	0.0206279
101121049	PPT1	NC_056054.1:14675828-14691721	150.097	49.4126	1.81119	0.000175272	0.0207367
105607800	NTN1	NC_056064.1:28269570-28476358	13.5961	40.5898	-1.44146	0.000176281	0.0207581
101119811	CFAP54	NC_056056.1:166295238-166620965	0.280533	0.95367	-1.63245	0.000179534	0.020945
101122806	SLC24A3	NC_056066.1:38474584-38900127	16.0154	3.28572	2.50509	0.000179538	0.020945
101108021	ASB5	NC_056079.1:6927493-6967241	15.0688	4.29587	2.05842	0.000181629	0.0210403
101107564	COL8A1	NC_056054.1:164842019-165008330	22.0226	7.30813	1.73681	0.000184322	0.0212071
101111019	LIX1	NC_056058.1:94157146-94212852	2.70961	0.0304513	6.64519	0.000186054	0.0212442
101107567	LHX8	NC_056054.1:51347806-51373862	0.0556913	0	9.18462	0.000186338	0.0212442
101102679	CPNE5	NC_056073.1:10744449-10845889	0.14197	0.921261	-2.59736	0.000204787	0.0230334
101122921	SYTL5	NC_056080.1:37260805-37528970	0.0599553	0.000756	6.54301	0.000209096	0.0234131
101121972	NIPSNAP1	NC_056070.1:68744714-68772472	14.333	4.24188	1.94591	0.000214511	0.0237427
101119750	BLVRB	NC_056067.1:49194479-49212054	88.2987	38.0414	1.36862	0.000214538	0.0237427
101110341	LOC101110341	NC_056062.1:31108300-31177803	1.20548	5.19503	-1.85711	0.000215825	0.0237427
105614372	ERICH4	NC_056067.1:50202634-50220390	1.82144	19.1391	-3.33334	0.000219513	0.0240429
101113724	TXNDC8	NC_056055.1:13018696-13055337	0.114397	0	10.8839	0.000222889	0.0242013
101107229	TKT	NC_056072.1:47803609-47826742	414.014	94.2284	2.38871	0.00022409	0.0242268
101117209	GDE1	NC_056077.1:17575039-17600463	79.0935	22.7709	2.02744	0.000226176	0.0243117
100125614	ROBO2	NC_056054.1:145246428-145915482	0.204323	1.98997	-2.58112	0.000227806	0.0243117
101114727	GLT1D1	NC_056070.1:48221342-48340161	0	0.0423457	-10.8993	0.000229561	0.0243117
101118463	ASTN1	NC_056065.1:57423818-57785455	0.015303	0	11.0423	0.000235573	0.0247223
101105662	GLDN	NC_056060.1:57111062-57164880	0.505767	2.84793	-2.35642	0.000240191	0.0251019
101105100	SLC35F2	NC_056068.1:17037465-17103559	9.95415	3.02107	1.94692	0.000247406	0.0256423
101120262	MKX	NC_056066.1:36243650-36312525	2.01376	0.327883	3.03165	0.000250764	0.0258834
101102901	NPNT	NC_056059.1:19569046-19646418	5.4443	1.95886	1.87856	0.000258194	0.0264328
101112600	PDGFC	NC_056070.1:42429909-42672024	13.844	5.61695	1.40793	0.000263854	0.0267935
443213	TAC3	NC_056056.1:162587308-162594037	0	3.91961	-13.3884	0.000265723	0.0268744
101103035	SLC25A16	NC_056078.1:24081332-24110230	67.9344	18.2129	2.13135	0.000267232	0.0269185
101121411	LCN2	NC_056056.1:8108566-8112770	8.31596	0.104253	6.46709	0.000271948	0.027284
100885767	GYPC	NC_056055.1:192578868-192625435	88.2992	33.0771	1.59599	0.000273963	0.0273767
100125617	OSTN	NC_056054.1:196928293-196949416	0.0352763	2.96777	-6.34225	0.000297034	0.0293331
101119516	NEGR1	NC_056054.1:47146824-48165091	0.673268	0.019528	5.10866	0.00029705	0.0293331
101117879	SEZ6L	NC_056070.1:66060997-66260453	0	0.0262707	-11.0544	0.000299876	0.029496
101120653	LOC101120653	NC_056056.1:194481530-194556137	3.19515	0.215862	4.20216	0.000306496	0.0300294
101110172	POU2F3	NC_056068.1:30535419-30621527	0.123049	0.789755	-2.54349	0.000330114	0.0322176
443389	TTR	NC_056076.1:25886082-25894574	37.4082	0.40587	6.4385	0.00033291	0.0323646
101109531	WNT7B	NC_056056.1:222143827-222197719	0	0.0265943	-9.1015	0.000337564	0.0325645
101123162	DHCR24	NC_056054.1:29276944-29310898	77.243	13.4354	2.77261	0.000339685	0.0325994
101120525	LOC101120525	NC_056070.1:50853102-50878674	27.6125	4.49386	2.6734	0.000340706	0.0325994
101120943	PPP5C	NC_056067.1:53375668-53396254	19.8136	67.8611	-1.61757	0.000341824	0.0325994
101119560	PITX1	NC_056058.1:44090476-44096981	0.812526	0.00633467	7.07929	0.000345896	0.0326261
101115635	RHBDL3	NC_056064.1:17579999-17633017	0.026271	0.608262	-4.49108	0.000355332	0.0332554
101115038	UNC93A	NC_056061.1:89687047-89725496	0.216143	0	8.99874	0.00036213	0.0336301
101121099	MDGA2	NC_056060.1:38124642-39050036	0.918385	0.201879	2.36008	0.000362506	0.0336301
101110896	NME9	NC_056054.1:251443317-251467806	6.2829	0.72894	3.23421	0.000363515	0.0336301
101106552	BEND6	NC_056073.1:3344345-3404841	2.03673	0.232288	3.2254	0.000364699	0.0336301
101109861	DCX	NC_056080.1:123600183-123717792	0	0.0355807	-10.5931	0.000367309	0.0337467
101117809	LOC101117809	NC_056075.1:32364666-32408909	0.0279497	0	9.08357	0.000369414	0.0337732
101113643	MEIOB	NC_056077.1:1928697-1963471	0.745921	3.67486	-2.24642	0.000371637	0.0337732
101114123	SOST	NC_056064.1:43391559-43396467	42.6523	2.71761	4.16878	0.00037773	0.0340799
101102548	LOC101102548	NC_056055.1:203108513-203193767	6.97961	2.67997	1.49317	0.000384676	0.0345302
101111411	PKD2L1	NC_056075.1:20959118-21003755	1.3521	0.170279	3.20441	0.000389734	0.0347876
101121307	ACSM3	NC_056077.1:18985820-19043809	96.727	17.5989	2.69041	0.00040032	0.0355008
101114977	AACS	NC_056070.1:50762459-50815793	33.9177	8.57632	2.22594	0.000402665	0.0355008
101114511	AGPAT2	NC_056056.1:2839985-2852203	852.703	234.394	2.09563	0.000403544	0.0355008
101118605	TUBA8	NC_056056.1:215209724-215227687	3.47573	0.266924	3.90515	0.000414398	0.0357879
101112356	H1-6	NC_056073.1:30829735-30834302	6.30142	0.480993	3.94936	0.000419523	0.0359129
101110625	ACAA1	NC_056072.1:11608660-11633147	78.4521	27.9784	1.70499	0.00043084	0.0367151
101111410	ATP5MK	NC_056075.1:23673100-23678431	224.909	78.4129	1.73259	0.000433285	0.0367151
101121433	KLHL1	NC_056063.1:44548404-45096863	0	0.00742633	-10.6685	0.000435786	0.0368026
100302354	SDR16C5	NC_056062.1:36419716-36436019	15.5903	4.93767	1.88924	0.000439527	0.036994
101106160	SERHL2	NC_056056.1:219342455-219362484	44.3509	15.5722	1.7067	0.000443212	0.0371794
114115413	EXOC1L	NC_056059.1:71957408-71977229	20.5853	2.71367	2.4093	0.000445184	0.0372203
101109353	FGF1	NC_056058.1:51264564-51383245	25.4468	5.66109	2.32987	0.000464441	0.0385732
101112537	NRG3	NC_056078.1:35919548-37160225	0	0.002906	-10.4366	0.000469718	0.0388827
101105400	LOC101105400	NC_056056.1:162884906-162906746	3.24602	0.836018	2.2104	0.000474251	0.0391288
100125613	ROBO1	NC_056054.1:147001864-148287878	2.90547	1.19313	1.46474	0.000489325	0.0401087
101112675	RAI14	NC_056069.1:39485479-39647652	16.4928	7.10873	1.37003	0.000496088	0.0401383
101114569	COL24A1	NC_056054.1:62852698-63246629	0.927337	0.084168	3.65293	0.000504569	0.0406932
114108841	LOC114108841	NC_056070.1:70597127-71220068	45.8948	490.375	-3.28368	0.000528597	0.0416953
101115091	CDR2	NC_056077.1:20557697-20585984	17.1434	4.68096	2.07154	0.000534785	0.0416953
101121420	LOC101121420	NC_056058.1:42118593-42119800	280.988	98.6186	1.71795	0.000536004	0.0416953
101118780	SLC25A13	NC_056057.1:14232788-14463568	6.95466	2.51588	1.68222	0.000536686	0.0416953
101109436	DENND5B	NC_056056.1:183898284-184123129	8.11254	3.7774	1.36223	0.000537513	0.0416953
100270685	KCNMA1	NC_056078.1:31813028-32580692	3.85265	1.81913	1.40815	0.000538083	0.0416953
101109581	MRPL28	NC_056077.1:893359-895970	35.0587	9.90971	2.01928	0.000538604	0.0416953
101123036	FSTL4	NC_056058.1:42478226-42952514	0.148023	0.03036	2.4537	0.000558345	0.0430905
101106720	LOC101106720	NC_056073.1:24810314-24832457	0.362728	0.010502	5.1906	0.000570416	0.0438871
101112455	TMEM255A	NC_056080.1:104603929-104652144	1.15069	4.20523	-1.78756	0.000578281	0.044198
101116192	DSC2	NC_056076.1:26368657-26406565	2.32497	0.542231	2.36775	0.000596783	0.0449
443246	SLC1A3	NC_056069.1:37720041-37800700	5.89482	19.3759	-1.6385	0.000597903	0.0449
101104951	APCDD1	NC_056076.1:42641301-42673958	22.2313	68.5384	-1.50371	0.000627891	0.0467922
101120623	NPC1	NC_056076.1:33411683-33455453	80.7501	30.6048	1.59989	0.00063236	0.0469256
101108778	LOC101108778	NC_056070.1:68898338-68900398	377.965	131.546	1.73783	0.000649671	0.047786
101118423	MYOM3	NC_056055.1:242539682-242592053	0.448045	4.63769	-3.28895	0.000655334	0.0480032
105616741	LOC105616741	NC_056066.1:67284818-67312465	0.0895023	3.27779	-5.01619	0.000656451	0.0480032
114116901	LOC114116901	NC_056064.1:19016112-19046647	0	0.0333887	-8.64241	0.000661218	0.0481026
101111495	ACAD9	NC_056072.1:58796530-58834944	36.3556	15.5149	1.4151	0.000665004	0.0481052
101110481	KIAA2012	NC_056055.1:204391568-204525466	1.41666	0.210621	2.86076	0.000667182	0.0481052
101109054	SFXN2	NC_056075.1:23060139-23078010	1.0492	5.06041	-2.10717	0.000675893	0.0483659
101120407	POU6F2	NC_056057.1:83025849-83159231	0.013184	0.172361	-3.54709	0.000687482	0.0488482
101107068	UNC5B	NC_056078.1:26588178-26678118	3.29781	1.28098	1.50358	0.000700479	0.0494913
101121828	ZNF385B	NC_056055.1:130207856-130686928	1.05132	0.076263	3.83549	0.000706879	0.0496637
101121348	NRG2	NC_056058.1:48690206-48887741	0.342825	0.0879017	2.14341	0.00071007	0.0497485
101114007	NDUFA6	NC_056056.1:218902884-218912709	166.603	57.777	1.73471	0.00073789	0.0514104
100147787	SLC25A4	NC_056079.1:14676539-14680622	129.39	44.3522	1.71729	0.000746153	0.0515565
XLOC_034905	XLOC_034905	NC_056056.1:59444545-59509600	0.453606	8.49969	-4.1632	0.000763239	0.0524545
101116756	LOC101116756	NC_056067.1:23477644-23507467	0.479462	0.03327	4.03543	0.000770629	0.0526808
114112239	LOC114112239	NC_056055.1:249927753-249944784	0.088732	1.29172	-3.75436	0.000770827	0.0526808
101110417	LOC101110417	NC_056060.1:84973736-84980632	27.4032	0.076394	8.82098	0.000784147	0.0534456
105610609	DNAJB3	NC_056054.1:7255199-7425193	0.186321	0	10.2123	0.000790879	0.0537583
101103155	STK32B	NC_056059.1:104404674-104788232	0	0.009371	-10.3584	0.000803494	0.0544682
101118372	LOC101118372	NC_056065.1:58835059-58866090	20.9699	7.77421	1.6407	0.000806836	0.0545473
101116323	LOC101116323	NC_056062.1:36462728-36485051	0.123992	0	10.26	0.000814487	0.0547693
101116785	TAGLN2	NC_056054.1:110937893-110945455	40.056	113.285	-1.3414	0.000834353	0.0557474
101115574	MGST2	NC_056070.1:18092003-18126733	20.0161	7.87451	1.54048	0.000847107	0.0563585
101114796	ITIH2	NC_056066.1:12146000-12177718	0	0.0373677	-8.8692	0.000850607	0.0564416
101121537	HERPUD1	NC_056067.1:24552230-24563466	132.09	40.5934	1.94339	0.000857966	0.0567797
101118647	LOC101118647	NC_056073.1:7958544-7984464	71.9332	30.4743	1.42435	0.000861482	0.0568623
101120981	DBT	NC_056054.1:77556236-77598178	39.9224	11.3858	2.058	0.00086415	0.0568887
105607887	LOC105607887	NC_056066.1:27281408-27288378	1.49178	0	12.2571	0.00087152	0.0570743
114115358	LOC114115358	NC_056054.1:23581773-24515480	0	0.0135597	-12.1571	0.000896258	0.0583895
101117583	CYSTM1	NC_056058.1:49030217-49100587	178.058	76.0084	1.40508	0.000974888	0.0622192
101122443	SMOC1	NC_056060.1:79701734-79846394	21.5091	57.4651	-1.32066	0.000990333	0.0630445
101121870	LOC101121870	NC_056064.1:6013254-6052661	0.0208963	0	8.46189	0.00100429	0.063771
101113975	LOC101113975	NC_056054.1:110292932-110325996	0.02473	0	8.44727	0.0010191	0.0643854
101103544	GABBR2	NC_056055.1:49127459-49497513	0.690276	3.64302	-2.2229	0.00102841	0.0647433
101118979	ADAMTS18	NC_056067.1:4017485-4164738	0.434779	1.76896	-1.9482	0.00102993	0.0647433
121816819	LOC121816819	NC_056069.1:41074972-41150289	2.01544	0.535029	2.5207	0.00104306	0.0652421
101106452	LOC101106452	NC_056067.1:13430841-13437695	248.761	110.399	1.35875	0.00104809	0.0653934
101121536	BFSP1	NC_056066.1:37476459-37513605	0.0717677	0	10.0589	0.0010521	0.0654807
101106896	ELOVL3	NC_056075.1:22640679-22643791	4.73067	0.0725077	6.1875	0.00111468	0.0689799
105604105	MACROD1	NC_056074.1:38777079-38931763	37.2297	13.9779	1.60949	0.00112591	0.0693858
101117659	PNPLA3	NC_056056.1:220546345-220566752	26.0137	5.16706	2.61218	0.00114223	0.0699455
100270720	NDUFA12	NC_056056.1:131195092-131222661	79.2503	32.8436	1.47285	0.00114336	0.0699455
101114662	EPHB1	NC_056054.1:254738321-255195394	0.427107	1.93371	-2.09992	0.00115537	0.0699975
101118449	LGALS3	NC_056060.1:65679167-65697710	510.666	235.09	1.30933	0.0011921	0.0713609
101103062	NDUFA7	NC_056058.1:14700189-14707467	98.6974	39.0931	1.5415	0.00121136	0.0717301
101117759	GABRA1	NC_056058.1:71119254-71179205	0.919881	0.186381	2.42105	0.0012117	0.0717301
101111152	ELN	NC_056077.1:33738523-33770923	19.535	104.562	-2.20245	0.00121452	0.0717301
101120003	UTS2	NC_056065.1:44863105-44892777	0.281811	0	11.7572	0.00121757	0.0717301
XLOC_086848	XLOC_086848	NC_056066.1:26533722-26642956	8.31359	2.17047	1.89845	0.00123017	0.0719862
101113149	GPX4	NC_056058.1:41265385-41267752	229.361	84.4802	1.63422	0.0012303	0.0719862
101119737	NPTX1	NC_056064.1:51525895-51595899	0.556934	2.57137	-4.26542	0.00123125	0.0719862
101109936	LOC101109936	NC_056054.1:118657184-118673324	0	0.186714	-10.2014	0.00126674	0.0735797
101119850	ACADS	NC_056070.1:63102183-63122291	102.926	38.2707	1.6407	0.0012673	0.0735797
101105885	WDR45	NC_056080.1:56030009-56035257	42.1399	16.8191	1.51069	0.00129641	0.074579
443209	ITGB6	NC_056055.1:149499147-149642596	0.0160247	0	9.92836	0.00131557	0.075336
114117340	LOC114117340	NC_056065.1:5655020-5719653	2.22241	0.846843	1.54699	0.00133344	0.0760124
100170667	COX5A	NC_056071.1:31428668-31439293	104.165	40.35	1.58614	0.00135211	0.0769016
XLOC_037183	XLOC_037183	NC_056056.1:136207353-136213954	594.853	164.701	2.07879	0.00135769	0.077044
101113097	DSCAML1	NC_056068.1:27825117-28189218	0.0100423	0	9.84996	0.00136518	0.0772942
101115872	CALR3	NC_056058.1:6298970-6325921	1.74031	0.20139	3.39431	0.00137754	0.0776961
101112253	APOE	NC_056067.1:52424882-52429892	400.206	188.972	1.2522	0.00138359	0.0776961
101113939	BCKDHB	NC_056061.1:7103498-7372809	30.6155	11.2777	1.64899	0.00138884	0.0776961
101116995	RSPO3	NC_056061.1:11351810-11446472	15.6861	6.51004	1.42986	0.00139267	0.0776961
101114598	KCNIP3	NC_056056.1:104323434-104422463	0.0234737	0	9.97233	0.00139396	0.0776961
101107828	ALDH5A1	NC_056073.1:32235582-32267799	21.4439	8.7667	1.57437	0.00143402	0.0795752
101115797	RDH12	NC_056060.1:77655707-77664470	0.0873423	0	8.40872	0.00144775	0.0801599
100500782	VIPR1	NC_056072.1:14653554-14684831	1.80336	0.1354	3.95185	0.00147284	0.0810768
101108738	SLC9A2	NC_056056.1:99084528-99173939	0.007899	0	8.25897	0.00147847	0.0810768
100135687	HIF3A	NC_056067.1:53341978-53373574	9.39798	32.1822	-1.61738	0.00148047	0.0810768
101112776	LOC101112776	NC_056074.1:37776443-37801622	0.286475	0	11.7296	0.00148819	0.0813222
101117174	PNPO	NC_056064.1:38244600-38259033	17.5733	4.58345	2.17412	0.00149856	0.0814162
443393	ALB	NC_056059.1:89222082-89239968	28.2716	0.365174	6.51775	0.00149895	0.0814162
101112666	XKR7	NC_056066.1:61155709-61181355	0.0290163	0	8.32435	0.00149977	0.0814162
101115360	OGDH	NC_056057.1:78434135-78501015	120.76	41.7579	1.7539	0.0015029	0.0814162
101109914	HORMAD2	NC_056070.1:69137944-69173116	0.056124	0	9.78818	0.00151044	0.0816482
101108995	LOC101108995	NC_056055.1:142237375-142312758	0.357846	0.00548033	5.59781	0.00151658	0.0816513
101102702	MID1IP1	NC_056080.1:38318345-38320652	154.144	45.7081	2.00118	0.00152526	0.0816513
101114407	P2RY1	NC_056054.1:235652570-235659404	13.3644	3.45381	2.13324	0.00152677	0.0816513
100135441	TALDO1	NC_056074.1:46973765-46981318	471.856	212.74	1.33539	0.00154931	0.0826806
101103249	SLC43A2	NC_056064.1:22581238-22624991	11.8862	4.52186	1.62897	0.00156545	0.083206
101108663	LOC101108663	NC_056062.1:80895802-80900503	168.011	68.4322	1.51083	0.00157216	0.0833675
101121180	OC90	NC_056062.1:22184272-22208283	0.088517	0	9.874	0.0015843	0.0836576
101113222	NR4A1	NC_056056.1:134284459-134311433	1.27357	5.07039	-1.88655	0.001601	0.0840631
443424	SC5	NC_056072.1:51674064-51676023	1.00599	0	9.77724	0.00161025	0.0843178
101110535	DGAT2	NC_056068.1:53943498-53976554	508.057	99.6329	2.57378	0.00162134	0.0847217
121818379	LOC121818379	NC_056080.1:91477686-91480384	13.6131	2.52757	2.65097	0.00167066	0.0867565
101117702	MCEE	NC_056071.1:25141860-25150211	68.4749	28.2031	1.49045	0.00170043	0.0877978
114109057	LOC114109057	NC_056071.1:65532883-65540512	0.034146	1.35651	-5.10069	0.00170154	0.0877978
101102710	CLIP4	NC_056056.1:35955552-36022162	2.65602	0.775664	1.9829	0.00170951	0.0878646
101113856	IVD	NC_056060.1:34227453-34239208	30.4476	11.2432	1.67107	0.00172099	0.0882736
101120850	MMD	NC_056064.1:5454519-5490926	148.019	52.3339	1.72856	0.0017364	0.0888223
101118728	LRP4	NC_056068.1:75712635-75766819	0.305247	1.35625	-2.07191	0.00173973	0.0888223
121818079	LOC121818079	NC_056079.1:6120482-6159438	1.89167	0.356103	2.55479	0.00174231	0.0888223
101120125	GFRA1	NC_056075.1:35993456-36229285	0.542385	2.56961	-2.18129	0.00177197	0.0899685
105611998	COPS9	NC_056054.1:1334633-1339158	78.0746	34.2096	1.41084	0.00177585	0.0899836
101109503	ARMH1	NC_056054.1:19347529-19406237	3.52437	1.33409	1.59598	0.00179594	0.0908182
101120057	LANCL3	NC_056080.1:36904293-37027466	0.601229	1.8031	-1.4748	0.00181576	0.0916357
101116541	CNTNAP5	NC_056055.1:189526480-190612887	0.721873	0.007098	6.89238	0.00182094	0.0916982
101103115	MCRIP2	NC_056077.1:1080852-1092640	24.8113	3.627	2.20108	0.00182431	0.0916982
101115107	BOLA3	NC_056056.1:95963200-95971258	23.8113	7.15113	1.97187	0.00183052	0.0917077
100190977	CKB	NC_056071.1:65892861-65896013	166.544	54.4798	1.82036	0.0018406	0.0918512
101122593	NDUFA4	NC_056057.1:19908585-19915853	308.644	123.641	1.53305	0.00184201	0.0918512
101122246	LOC101122246	NC_056077.1:35963576-35967506	10.2236	1.89506	2.66838	0.0018586	0.0924947
114111248	LOC114111248	NC_056080.1:132839489-132840305	6.99017	0.365573	4.47411	0.00187234	0.0927623
101120455	LOC101120455	NC_056054.1:99930277-99936850	25.7079	9.95712	1.55491	0.0018727	0.0927623
101122799	KLF12	NC_056063.1:49104321-49625788	2.96293	7.59844	-1.23809	0.00188392	0.0928566
101113847	SHC2	NC_056058.1:40784002-40811735	7.09336	2.72641	1.53455	0.00190788	0.0936465
101107885	TOX2	NC_056066.1:72372805-72528108	0.0165777	0.137522	-2.92794	0.00192347	0.0942275
101119421	CDH18	NC_056069.1:53522953-54134046	0	0.0111783	-11.4415	0.00193699	0.0945207
101105076	ADAMTS10	NC_056058.1:14902298-14924170	4.77913	12.9908	-1.34075	0.00194141	0.0945521
101104165	LOC101104165	NC_056065.1:37919854-37948097	83.4867	40.3917	1.1974	0.00196348	0.0952571
101120966	PRDX1	NC_056054.1:20135449-20145938	316.461	133.148	1.45232	0.00199452	0.0965762
101110770	RAD54B	NC_056062.1:82772834-82885677	7.12226	2.81902	1.47706	0.00200076	0.0966135
101113437	NDUFB1	NC_056071.1:54612242-54623412	64.1775	24.9635	1.56128	0.00200299	0.0966135
101114663	LOC101114663	NC_056054.1:268990354-268995109	129.206	28.8708	2.42259	0.00200987	0.0967595
121816918	LOC121816918	NC_056070.1:14101813-14233449	0.0449367	0	9.58325	0.0020149	0.0968155
101106534	LOC101106534	NC_056063.1:70075752-70263609	3.37348	1.36823	1.48138	0.00204849	0.0980147
101110876	SEC14L2	NC_056070.1:69399658-69423607	0.0789323	3.53132	-4.90228	0.0020546	0.0980147
101117078	GRID2	NC_056059.1:31427684-33118369	3.11623	0.423086	2.94139	0.00205549	0.0980147
101117195	GALNT9	NC_056070.1:44893894-45014408	0	0.017839	-9.63285	0.00206743	0.0981952
101114836	B4GALT6	NC_056076.1:25798570-25870582	1.81715	0.255474	2.81089	0.00207211	0.0981952
114114509	LOC114114509	NC_056057.1:47575686-47705373	5.66501	2.04219	1.88205	0.00207493	0.0981952
100141301	GSTA1	NC_056073.1:24772942-24808045	27.8669	1.01182	4.51884	0.00208292	0.0983356
101114789	NALF1	NC_056063.1:82179110-82787491	0	0.0108837	-11.3756	0.0020861	0.0983356
106991623	TPBGL	NC_056068.1:53187729-53191002	3.02675	0.180763	4.30186	0.00209913	0.0985961
114117827	TMEM160	NC_056067.1:53866404-53868873	40.0703	15.566	1.51436	0.00210534	0.098703
101109946	TNS1	NC_056055.1:219916107-220161086	46.7659	134.16	-1.44206	0.00212481	0.0994301
101121732	ASAH2	NC_056075.1:8350760-8425562	0.416548	0.0175747	4.86813	0.00213147	0.099556
106991878	RNF152	NC_056076.1:60620248-60700838	7.40871	3.58223	1.18516	0.00215859	0.100448
101105648	CRAT	NC_056056.1:7349409-7362278	61.0076	24.0559	1.54552	0.00217105	0.100841
101117171	SNTB1	NC_056062.1:94788104-95033143	25.449	9.0866	1.67107	0.00218672	0.101381
101119213	CCNG1	NC_056058.1:72690993-72698237	317.643	143.332	1.35653	0.00219441	0.10155
101115684	ALAS2	NC_056080.1:53050996-53077724	5.96258	1.90673	1.72005	0.0021993	0.101589
101113117	FUOM	NC_056075.1:51204024-51207447	32.9501	9.41	2.00727	0.00222226	0.102118
101120458	CISD1	NC_056075.1:351877-370197	31.4323	12.9805	1.48852	0.00222589	0.102118
101115490	NAV2	NC_056074.1:22345557-23145541	1.68953	4.12305	-1.24502	0.00222681	0.102118
101120994	RBKS	NC_056056.1:34780634-34889759	6.4115	1.62861	1.46756	0.00223069	0.102118
101122865	LOC101122865	NC_056059.1:25641295-25653820	0.107058	0	8.64027	0.00225508	0.10284
101107275	MACC1	NC_056057.1:29762578-29848259	0.0203353	0	9.55872	0.0022616	0.10295
101113960	RSPH14	NC_056070.1:71857763-71906124	1.70615	0.0381763	5.69887	0.00228704	0.10392
121820152	LOC121820152	NC_056061.1:15323848-15353798	7.23333e-05	0.426373	-10.0573	0.00230116	0.104372
101107212	PHYH	NC_056066.1:27320930-27337713	283.866	119.606	1.45618	0.0023421	0.105616
101102235	ADAMTS19	NC_056058.1:22187748-22453471	0.432478	1.64563	-1.89201	0.00234365	0.105616
101111939	GLIS3	NC_056055.1:72137625-72627800	1.1309	2.72633	-1.2753	0.00235414	0.105616
101114968	LOC101114968	NC_056065.1:42390887-42406418	8.72593	3.5152	1.46265	0.00235522	0.105616
101121007	ARHGEF37	NC_056058.1:58702099-58757412	17.6686	6.15266	1.73534	0.00235641	0.105616
101122940	LOC101122940	NC_056056.1:206401431-206472344	41.5651	18.8402	1.3331	0.00238646	0.106697
101115381	ASGR2	NC_056064.1:26740083-26750949	0.14378	4.12574	-4.77974	0.00239684	0.106971
101112765	MLEC	NC_056070.1:63059954-63082281	61.4346	22.6761	1.6487	0.00240144	0.106986
101112227	RPS27L	NC_056060.1:45079653-45083120	195.144	89.3845	1.32215	0.00240712	0.107049
443409	HSD11B1	NC_056065.1:73023447-73086378	22.8392	72.0168	-1.5583	0.00243558	0.107932
101105458	RBP4	NC_056075.1:14677595-14692459	214.438	652.9	-1.4876	0.00245767	0.108718
101102773	MELTF	NC_056054.1:192291178-192317935	0.167905	3.96149	-4.54017	0.00246388	0.108766
101119272	TMEM61	NC_056054.1:29358707-29372186	5.95785	1.48483	2.26405	0.00246741	0.108766
101103771	LOC101103771	NC_056054.1:103749564-103750996	77.9245	11.1372	3.11696	0.00248635	0.109253
101118274	ELOVL6	NC_056059.1:15561913-15701183	638.731	154.759	2.30939	0.00248719	0.109253
101122731	MMUT	NC_056073.1:21872199-21912874	56.0445	24.4868	1.39495	0.00250384	0.109583
101108165	PCDH10	NC_056070.1:25250429-25293225	0.406372	4.20666	-3.40847	0.00250779	0.109583
114117992	LOC114117992	NC_056067.1:50167230-50183567	11.1839	36.6327	-1.58309	0.00253994	0.110356
101116994	TERB2	NC_056060.1:101178143-101216548	0.041716	0	9.34979	0.00254308	0.110356
101117270	RHPN2	NC_056067.1:42903041-42973728	0.660484	0.152056	2.34162	0.00258405	0.111555
121816658	LOC121816658	NC_056068.1:30816031-30885435	0	0.081431	-11.1679	0.00259401	0.111792
101120358	SLC25A1	NC_056070.1:72649008-72651785	149.983	52.9077	1.73096	0.00264435	0.113721
101116564	ADAM22	NC_056057.1:73690146-73925588	0.434737	0.0999827	2.27767	0.00264783	0.113721
101116912	TMEM87A	NC_056060.1:35815402-35855769	29.4429	15.4762	1.09581	0.00270954	0.115249
101112539	HINT2	NC_056055.1:52731975-52734550	59.7274	21.145	1.85242	0.0027218	0.115249
101120110	RETREG1	NC_056069.1:56691664-56848935	14.2423	4.72733	1.71674	0.00272853	0.115249
443361	NPY1R	NC_056059.1:2682365-2691584	0.236103	2.25385	-3.12378	0.00273465	0.115249
101113900	MPV17L	NC_056077.1:14321322-14327840	5.0883	0.638385	3.2181	0.00273844	0.115249
100302304	ARF4	NC_056072.1:43710244-43727720	331.515	148.05	1.35476	0.00273856	0.115249
101118337	TNC	NC_056055.1:8661624-8762845	5.4633	1.31207	2.181	0.0027436	0.115268
105605798	LOC105605798	NC_056065.1:6658630-6812356	4.53571	14.132	-1.75113	0.00274893	0.115299
101107831	LOC101107831	NC_056054.1:86963737-86972952	1.88056	0.174005	3.64648	0.00275838	0.11531
101106492	LOC101106492	NC_056055.1:147583737-147664468	58.3268	24.8272	1.30971	0.00277384	0.115571
443231	ADCYAP1R1	NC_056057.1:66793921-66913580	0.65991	2.3998	-1.6997	0.00282087	0.116947
101120772	GCSH	NC_056067.1:7254704-7266165	60.914	24.2765	1.52286	0.00287353	0.118635
101104372	CA5B	NC_056080.1:13849152-13956558	4.80522	15.708	-1.5767	0.00287577	0.118635
101111454	C6H4orf17	NC_056059.1:25427025-25525662	0.394716	0.0127277	4.37213	0.00291164	0.119917
101111100	CXCL13	NC_056059.1:93009389-93015340	0	0.276821	-9.31882	0.00297399	0.122084
101116577	NRXN3	NC_056060.1:87447430-89290222	0.001581	0.149451	-6.27805	0.00298894	0.122498
121816035	LOC121816035	NC_056066.1:57203625-57206901	0	0.210358	-8.05984	0.00302522	0.123536
101120483	NINJ2	NC_056056.1:213275024-213346180	11.8204	5.00101	1.44228	0.00305562	0.124014
101109024	PENK	NC_056062.1:36548461-36552896	3.89609	0.0872023	5.67684	0.00308378	0.124754
101119694	RASEF	NC_056055.1:36676050-36760591	0.123545	1.20403	-3.27708	0.00308985	0.124798
101114182	ALDH1L2	NC_056056.1:174155167-174218588	41.9314	19.4027	1.27367	0.00310128	0.124894
101118899	NDUFS4	NC_056069.1:25584084-25697482	119.741	56.7946	1.27323	0.00310716	0.124894
101118164	LOC101118164	NC_056055.1:105201972-105219870	53.8224	12.8257	2.34872	0.00312067	0.125115
101115240	GADD45A	NC_056054.1:43324851-43327977	52.365	21.8155	1.42038	0.00312763	0.125115
114116085	LOC114116085	NC_056061.1:74157384-74201070	2.68961	20.5116	-2.85788	0.00318133	0.127061
101102064	STPG2	NC_056059.1:26972237-27339325	0.011786	0	10.8746	0.00321742	0.128099
101121538	LOC101121538	NC_056067.1:45683050-45692199	261.169	123.541	1.27407	0.00327166	0.129432
101111907	DNAJC21	NC_056069.1:39362093-39387967	33.5737	15.2684	1.34229	0.00330707	0.130088
101104034	PPL	NC_056077.1:4517678-4565768	10.6548	24.9967	-1.10575	0.003309	0.130088
100036762	SDHA	NC_056069.1:71850005-71871555	128.861	55.9421	1.40619	0.00332436	0.13034
101107942	NFU1	NC_056056.1:38913302-38942249	77.4552	33.5691	1.40419	0.0033258	0.13034
114112157	LOC114112157	NC_056070.1:70697535-70820847	0.579309	14.4607	-4.28773	0.0033391	0.130497
101114557	NPR3	NC_056069.1:41069885-41148931	10.5546	3.40919	1.80986	0.00334043	0.130497
105604846	C24H16orf91	NC_056077.1:1643718-1647994	3.64934	0.44413	3.26578	0.0033454	0.130497
101117101	FOSB	NC_056067.1:52861368-52868302	0.330615	2.89191	-2.99067	0.00340842	0.132133
101111337	LOC101111337	NC_056054.1:107685312-107727733	11.3033	30.592	-1.31062	0.00341919	0.132228
101103375	PIR	NC_056080.1:13567720-13666147	14.5045	6.16897	1.39679	0.00343848	0.132479
101107437	GPR37	NC_056057.1:90656104-90674210	2.02627	0.348328	2.67951	0.00346609	0.133338
101122157	S100A9	NC_056054.1:103735666-103738350	33.7972	8.21739	2.31497	0.00347702	0.133554
101103462	MGST1	NC_056056.1:199108271-199129893	731.128	328.903	1.33821	0.00351877	0.134951
101120321	LRGUK	NC_056057.1:99466011-99575793	0.0145063	0	9.20786	0.00353561	0.135183
105603308	CCDC85C	NC_056071.1:62183773-62262583	5.35584	2.15232	1.5311	0.00355678	0.135504
101117459	LRRC7	NC_056054.1:45333003-45954102	1.67008	0.356202	2.40765	0.00355856	0.135504
101121147	GEMIN8	NC_056080.1:12142428-12159488	15.0148	6.69148	1.35742	0.00356993	0.135504
101122024	PDE6A	NC_056058.1:58968597-59091785	5.61489	1.39718	2.24848	0.00357102	0.135504
101107994	ADAMTS16	NC_056069.1:67890388-68073986	12.8117	1.3086	3.47458	0.00358971	0.135608
101111393	FAM169A	NC_056069.1:6846812-6914781	4.87336	1.13367	2.42965	0.00359013	0.135608
105610140	ATP5MF	NC_056077.1:37397537-37402533	255.5	109.228	1.41809	0.00359538	0.135608
443113	MMP13	NC_056068.1:5380854-5391497	0.436204	0	10.7694	0.0036343	0.136505
101110664	LOC101110664	NC_056056.1:103535551-103537604	435.359	192.771	1.38932	0.00363584	0.136505
101104080	IDH3B	NC_056066.1:52242549-52247494	78.9553	35.9474	1.35816	0.00368564	0.137694
101103717	PTPRZ1	NC_056057.1:87913611-88112774	0.670318	0.0999953	2.57733	0.00368913	0.137694
121818828	GPR39	NC_056055.1:178378946-178649261	0.334546	0.0877657	2.08333	0.00370951	0.138045
101113205	PDK1	NC_056055.1:137280131-137326608	15.9257	7.74837	1.21673	0.00372573	0.138443
101116886	LOC101116886	NC_056080.1:68937557-68941842	246.922	117.46	1.26742	0.0037584	0.13945
114110441	LOC114110441	NC_056076.1:33463418-33547997	42.1411	19.1089	1.30676	0.00378585	0.140258
101115980	KCNT2	NC_056065.1:5929851-6375461	0.22991	0.0819673	1.60294	0.00379136	0.140258
101106179	NDUFB9	NC_056062.1:28589097-28596695	120.816	57.9591	1.25646	0.00382575	0.141202
114115283	LOC114115283	NC_056059.1:25928855-25966565	0.797602	0.0519467	4.06219	0.00383614	0.141289
101111847	LOC101111847	NC_056054.1:187240350-187307068	2.47411	0.363226	2.96884	0.00384249	0.141316
101111394	SPEF2	NC_056069.1:38516778-38720147	0.691677	2.50815	-1.71524	0.00385938	0.141571
101103450	TRPM2	NC_056054.1:265079481-265130985	16.3285	55.8841	-1.63423	0.00389351	0.142104
105614373	LOC105614373	NC_056067.1:49834451-49851493	8.1426	1.06759	3.66885	0.00390936	0.142314
101123341	LOC101123341	NC_056054.1:260269866-260338529	14.4889	5.42918	1.47264	0.00392244	0.142377
101108271	SETBP1	NC_056076.1:44714338-45124267	5.14061	9.87992	-1.15948	0.00396893	0.143372
101117601	RNF157	NC_056064.1:54806099-54886334	8.75905	4.04539	1.31533	0.00397271	0.143372
114108736	GASK1B	NC_056070.1:40991476-41063552	40.2719	21.4544	1.06226	0.00402111	0.144802
101107203	ANXA13	NC_056062.1:29168984-29226876	0.81508	0.146783	2.48884	0.00402425	0.144802
101114311	CCDC197	NC_056071.1:56316863-56409798	28.5791	16.6383	1.62697	0.00402966	0.144802
101108412	MATN4	NC_056066.1:73535609-73550690	0.784553	3.49017	-2.08583	0.0040431	0.14487
101105976	LOC101105976	NC_056079.1:6345678-6352253	0	0.082669	-7.72674	0.00405942	0.145247
101123491	ATP5MG	NC_056068.1:28821490-28829111	309.827	149.904	1.24245	0.00408208	0.145738
101123654	COQ9	NC_056067.1:25036391-25048864	27.8328	11.9	1.43373	0.00408475	0.145738
101117184	LOC101117184	NC_056067.1:23514101-23515907	1.39947	23.0916	-3.81549	0.0040925	0.145807
443544	SHMT1	NC_056064.1:34072580-34099277	12.5602	4.48432	1.72184	0.00412744	0.146843
101122543	SULT2B1	NC_056067.1:54965371-55001551	0	0.0436697	-9.19093	0.00414445	0.14724
101109187	PI15	NC_056062.1:51150591-51186765	7.24938	25.3107	-1.73329	0.00426416	0.151065
101115005	DHRSX	NC_056080.1:6132795-6279557	21.3289	8.92267	1.27854	0.00427211	0.151133
101112981	LOC101112981	NC_056059.1:103672878-103707018	3.45748	0.782802	2.29462	0.00427922	0.151171
XLOC_038360	XLOC_038360	NC_056056.1:172027361-172084453	0.156324	0.64588	-4.42214	0.00428933	0.151215
101108258	LOC101108258	NC_056070.1:70955837-71220068	5.29703	44.4446	-3.06971	0.00429252	0.151215
101108191	GRHPR	NC_056055.1:51312304-51321296	18.6062	7.27683	1.5481	0.00430652	0.151495
101102510	SESN3	NC_056068.1:14826047-14907461	123.801	64.3504	1.10659	0.00434165	0.152422
101115914	IFRD2	NC_056072.1:50091658-50120887	10.8463	5.32998	1.27847	0.00434502	0.152422
101115211	THBS4	NC_056060.1:10970157-11023816	21.8435	9.6408	1.26788	0.00438032	0.153446
101123463	NDUFA5	NC_056057.1:89465356-89482904	31.9345	10.3065	1.57704	0.00440839	0.154214
101110592	C6H4orf19	NC_056059.1:57562947-57640397	1.10775	0.11015	3.50994	0.0044233	0.15452
101118234	SYT12	NC_056074.1:41418739-41441578	1.12115	0.193466	2.71665	0.00444005	0.154527
101122190	GCDH	NC_056058.1:10961398-10968133	31.1982	12.3489	1.55506	0.00444007	0.154527
101108025	IL13RA2	NC_056080.1:119680648-119771214	10.6875	3.17203	1.97086	0.00445863	0.154891
101104764	NAA38	NC_056064.1:27362399-27386268	37.6874	16.8274	1.32404	0.00451263	0.156083
101106731	PRDX3	NC_056075.1:38860184-38869268	63.7278	29.2507	1.3256	0.00453945	0.156614
101107781	ABCB5	NC_056057.1:30313819-30431613	0.0310893	0	10.5534	0.00456929	0.156996
101117965	LOC101117965	NC_056070.1:62879417-62881309	366.587	174.05	1.27619	0.00459635	0.15771
101114253	NDUFA8	NC_056056.1:13731864-13749244	82.7187	40.8935	1.21807	0.00464805	0.159209
100534646	UGT1A4	NC_056054.1:7254898-7321736	0.036465	0.000191333	7.44433	0.00465274	0.159209
101112853	ALAS1	NC_056072.1:48760844-48774853	58.6011	26.2386	1.36943	0.00466648	0.159461
101118985	NDUFS3	NC_056068.1:76309150-76313956	45.8772	20.7356	1.34363	0.0047399	0.161311
105611350	C12H1orf53	NC_056065.1:76263773-76270288	17.4338	6.37786	1.65558	0.00475059	0.161456
101122167	CBR4	NC_056055.1:111953190-111973087	25.8207	11.4403	1.36297	0.00478319	0.162283
101104823	NDUFA13	NC_056058.1:3621761-3629939	136.036	67.4776	1.20766	0.00479087	0.162283
101107761	LOC101107761	NC_056054.1:267223740-267265040	5.12898	2.30048	1.38966	0.00491969	0.165459
101117331	TECR	NC_056058.1:9552730-9581115	86.197	38.7347	1.36614	0.0049224	0.165459
101105462	ABAT	NC_056077.1:8100802-8186492	0.940714	0.109125	3.2345	0.00492777	0.165459
101105201	FFAR4	NC_056075.1:14654182-14676448	1.33668	5.44108	-1.85786	0.00496158	0.166372
101105150	BLOC1S1	NC_056056.1:163742116-163745761	100.046	49.0113	1.21702	0.00500212	0.167302
101102750	AXL	NC_056067.1:49958877-49994988	13.6629	37.1809	-1.38088	0.00500867	0.167302
114118341	LOC114118341	NC_056068.1:82133636-82173070	0.451883	0.0605957	3.03794	0.00514332	0.171549
101113342	SLC46A3	NC_056063.1:31718441-31742176	26.3553	11.1959	1.2889	0.0051955	0.17283
101115782	PMPCA	NC_056056.1:3066574-3076578	28.1388	12.7658	1.33715	0.00520456	0.172902
101103913	PMEPA1	NC_056066.1:58149219-58206725	15.8615	47.8554	-1.51897	0.00523525	0.173459
121820289	LOC121820289	NC_056062.1:12704072-12704970	144.839	63.2265	1.37161	0.00524008	0.173459
101111424	COL6A6	NC_056054.1:272633094-272812347	0.887449	4.55568	-2.25712	0.005249	0.173459
101114565	KLHL31	NC_056073.1:7000810-7021785	21.1628	7.74355	1.6895	0.00531076	0.175039
101115773	NDUFAB1	NC_056077.1:21793339-21804392	56.868	26.1334	1.33445	0.00542951	0.178017
101111109	KRT20	NC_056064.1:40808001-40817815	0	0.132741	-9.02393	0.00552116	0.180015
101102300	TMEM182	NC_056056.1:98996264-99066915	27.2595	7.34576	2.03387	0.00552634	0.180015
101104594	LOC101104594	NC_056066.1:42153640-42180579	115.413	46.5011	1.53572	0.00556052	0.180894
101117246	ATP10B	NC_056058.1:69761611-70142332	0	0.00352967	-8.9012	0.00557358	0.181084
101107153	LOC101107153	NC_056054.1:185300057-185307344	297.149	137.781	1.32029	0.00564016	0.182773
101121162	PTPRR	NC_056056.1:148915957-149194651	13.3212	7.00993	1.10313	0.00564843	0.182805
101114256	ACTG2	NC_056056.1:95717366-95741460	1.11278	3.9595	-1.77653	0.00567051	0.183007
101105469	ADARB1	NC_056054.1:265653848-265767287	28.0312	13.8832	1.20461	0.00567656	0.183007
101115445	ITGA7	NC_056056.1:163752148-163775601	36.4867	15.3702	1.48268	0.00568576	0.183068
101102413	LOC101102413	NC_056067.1:38558574-38565007	16.2045	84.6387	-2.36866	0.00579932	0.185997
101123388	KCNJ12	NC_056064.1:35067164-35104531	0.391601	0.063344	2.78801	0.00581522	0.185997
101106003	PRKAR2B	NC_056057.1:49664837-49775891	39.9838	92.1194	-1.05239	0.0058212	0.185997
101105869	UROS	NC_056075.1:44790176-44822358	17.5865	6.87015	1.43614	0.00583994	0.186358
101117123	ANKRD35	NC_056054.1:99204534-99220810	25.9591	11.0202	1.38171	0.00586161	0.186361
101110910	IDH3G	NC_056080.1:80490226-80498754	43.3435	20.2263	1.29288	0.00586462	0.186361
101107015	TMEM196	NC_056057.1:29385801-29643211	1.04165	0.262054	3.62531	0.00587152	0.186361
101107460	ANGPT4	NC_056066.1:59854076-59900701	3.49557	8.81728	-1.1863	0.00591821	0.187425
101119747	CDH1	NC_056067.1:35614031-35685913	0.995892	0.0475477	4.65093	0.00595364	0.188072
101107789	PRDM8	NC_056059.1:95533924-95605540	1.67131	4.104	-1.4116	0.00597449	0.188493
100127218	LOC100127218	NC_056077.1:28057768-28063602	0.761278	0.0140043	5.68725	0.00600034	0.189071
101111537	TMBIM7P	NC_056057.1:10495814-10525378	2.69796	0.70435	1.84062	0.00603103	0.1898
101123103	CCDC150	NC_056055.1:198975058-199074693	0.957344	2.79749	-1.42617	0.00605904	0.189864
101114832	ACP6	NC_056054.1:98711542-98732939	13.4365	5.92391	1.35967	0.00606075	0.189864
101118806	EYA2	NC_056066.1:75494271-75753569	0.793144	0.277573	1.75306	0.00607094	0.189864
101120635	SH3BGRL	NC_056080.1:71959121-72035115	129.621	68.1305	1.10232	0.00614292	0.191638
101122131	DKK3	NC_056068.1:40445528-40496715	9.19755	3.77277	1.35085	0.0062025	0.192777
101108017	CHCHD2	NC_056077.1:28266135-28323435	109.406	55.6551	1.21118	0.006226	0.192829
101113397	LYPD6B	NC_056055.1:160300031-160548399	0.526158	0.0325833	4.13675	0.00623385	0.192829
101117990	ADGRA2	NC_056079.1:32161189-32197661	19.3912	49.5938	-1.30307	0.00623494	0.192829
101106437	NT5DC1	NC_056061.1:21684358-21800926	6.11188	3.04773	1.2027	0.00625054	0.193074
101107958	WDR83OS	NC_056058.1:11125048-11138274	80.207	41.3783	1.1449	0.00626504	0.193284
101119682	DEUP1	NC_056074.1:999477-1127721	0	0.0267027	-10.3806	0.00635559	0.195357
101118982	SPON1	NC_056068.1:38204474-38517064	12.0467	46.7165	-1.96637	0.00638613	0.195857
101106615	FXYD3	NC_056067.1:45133666-45140281	0	0.134504	-7.64343	0.00639195	0.195857
101103364	SERPINB5	NC_056076.1:62041798-62065378	6.82585	2.6099	1.55176	0.00640531	0.195857
101114801	TMEM147	NC_056067.1:45493922-45495793	103.23	47.9649	1.30507	0.00640932	0.195857
101121755	C2H2orf72	NC_056055.1:232840174-232849684	2.29881	0.256782	2.91792	0.0064109	0.195857
101101961	PCDH19	NC_056080.1:134399014-134528326	0.223461	0.899328	-1.88866	0.00643598	0.196383
101102108	NSUN3	NC_056054.1:159346039-159407246	5.09802	2.25052	1.39793	0.00646476	0.197022
654404	ACLY	NC_056064.1:41787714-41830034	62.9564	26.5012	1.48177	0.00649345	0.197603
101116076	LOC101116076	NC_056066.1:64562264-64655796	25.4058	12.7684	1.18757	0.00653702	0.197603
101116142	CPAMD8	NC_056058.1:5851824-5951495	0.0999727	0.0131167	3.16721	0.00653898	0.197603
101123510	HFM1	NC_056054.1:68531995-68685231	0.00269467	0.0789937	-4.87216	0.0065805	0.198565
101114902	LDLRAD3	NC_056068.1:65189457-65527277	6.89992	18.6287	-1.46368	0.00658941	0.198565
100462693	NDUFB6	NC_056055.1:101693781-101708638	116.894	59.5737	1.17979	0.00659455	0.198565
101118195	ASPH	NC_056062.1:39960098-40147660	280.786	139.177	1.19838	0.00666061	0.200074
100171395	RGN	NC_056080.1:57704045-57719659	5.64543	2.38591	1.54679	0.00668036	0.200187
101116743	DLG4	NC_056064.1:26799831-26824007	1.32063	3.89084	-1.56865	0.00669968	0.200527
101114456	LOC101114456	NC_056065.1:4847404-4946208	7.03074	21.3593	-1.48693	0.00671241	0.200668
443456	LOC443456	NC_056054.1:90319385-90353156	40.1962	13.5155	1.83172	0.00673301	0.200805
101110125	KLHDC7A	NC_056055.1:247854260-247867177	0.1469	0.00331233	5.39423	0.00675642	0.201264
101104291	FBXO24	NC_056077.1:36392306-36401450	2.57602	0.367536	3.094	0.00676913	0.201404
101103745	SPAG6	NC_056066.1:22868653-22928276	0	0.0194143	-8.75361	0.00684381	0.203144
101118317	CPT2	NC_056054.1:27723917-27746951	20.4512	9.95481	1.24323	0.00691709	0.204902
101116107	SYCE1	NC_056075.1:51466940-51478877	0.082444	0	8.83563	0.00704808	0.208467
106990973	PAQR7	NC_056055.1:240956267-240967281	2.29993	0.429293	2.77615	0.00708979	0.209084
101104339	GUCY1A2	NC_056068.1:16009912-16389117	0	0.007775	-10.2314	0.00710137	0.209084
101108428	LOC101108428	NC_056072.1:48089798-48143813	18.9996	9.50664	1.18751	0.00710228	0.209084
101102411	LOC101102411	NC_056066.1:57173578-57219570	0.00292433	0.123597	-5.11123	0.00714101	0.209649
101111845	RXRG	NC_056054.1:117393889-117446641	21.6142	48.7172	-0.996969	0.0071428	0.209649
101119606	THEM4	NC_056054.1:101823356-101874614	18.6098	9.60231	1.16916	0.00714657	0.209649
114116835	DCXR	NC_056064.1:50373224-50375838	76.4757	32.7993	1.43776	0.007174	0.210208
102238525	AK6	NC_056069.1:10494564-10508828	14.1042	6.38445	1.34041	0.0071958	0.210601
101106191	GPR158	NC_056066.1:25330133-25633683	0.205234	0.730412	-1.78603	0.0072568	0.211699
114114492	TOMM7	NC_056057.1:32421650-32429518	137.514	74.1896	1.07256	0.00725863	0.211699
101110635	ADAMTS5	NC_056054.1:130018461-130075578	15.5323	62.1221	-1.9049	0.00735563	0.21403
101110916	ATP5IF1	NC_056055.1:238875010-238877063	218.293	113.489	1.13351	0.0073829	0.214575
114108762	ACOT9	NC_056080.1:22123732-22153185	80.6739	41.3176	1.16258	0.00746088	0.21634
101111781	ACSL4	NC_056080.1:125583498-125658567	14.013	34.6646	-1.1566	0.00751276	0.217592
101111426	EIF4EBP1	NC_056079.1:32335030-32359181	22.2268	56.3562	-1.20094	0.00753329	0.217698
101116789	SEC11C	NC_056076.1:58487444-58499399	37.1625	17.8796	1.25194	0.00759881	0.219325
101118506	LPAR4	NC_056080.1:69924961-69939379	1.28661	4.55401	-1.8432	0.00760852	0.219353
101110431	AGMAT	NC_056065.1:51257182-51266462	0.59196	0.062675	3.46264	0.00769283	0.221275
114117240	LOC114117240	NC_056054.1:97865027-97955391	3.55152	0.439547	3.07567	0.00772715	0.22189
101121482	ZNHIT1	NC_056077.1:35899399-35924608	44.9586	8.7472	1.24984	0.00774564	0.22189
101118866	ATP23	NC_056056.1:161706339-161731702	78.1993	37.1554	1.21539	0.00774961	0.22189
101121574	AIFM1	NC_056080.1:113994761-114023138	18.1112	8.8364	1.23387	0.00781122	0.222804
101111289	RYR3	NC_056060.1:26921919-27497844	0.0877477	0.00647633	3.77152	0.00781316	0.222804
100302318	GATD3	NC_056054.1:264849352-264857436	106.471	54.7402	1.15729	0.00781705	0.222804
101119009	HACL1	NC_056054.1:273609584-273653993	49.0969	23.1393	1.29718	0.0078403	0.223213
101104516	TMC2	NC_056066.1:52268353-52369513	0.00925467	0	8.70714	0.00790982	0.224937
100216464	NDUFA1	NC_056080.1:114631255-114634397	146.829	75.5847	1.14937	0.00792993	0.22496
101105035	LOC101105035	NC_056073.1:43812916-43915573	5.487	12.4383	-1.31622	0.00794651	0.22496
101105406	SMDT1	NC_056056.1:218898450-218901841	80.1562	40.1009	1.17644	0.00797813	0.2256
101110266	LOC101110266	NC_056068.1:53896538-53906494	1.76373	0.022622	6.46728	0.00798769	0.225616
101117411	HERPUD2	NC_056057.1:63007373-63044396	68.1362	29.9974	1.22683	0.00803942	0.226567
121817145	LOC121817145	NC_056071.1:4259218-4435343	0	0.016527	-10.1467	0.00804932	0.226591
443184	AQP9	NC_056060.1:50224583-50275712	0	0.0206887	-8.6534	0.0080597	0.226629
101105616	SDHC	NC_056054.1:112733322-112763726	81.7893	42.9908	1.11944	0.00810517	0.227653
XLOC_081395	XLOC_081395	NC_056065.1:63453061-63476029	0.66933	0.015178	5.5371	0.00811535	0.227684
101110118	PDHA1	NC_056080.1:17891869-17914843	59.3728	28.9508	1.24728	0.00814094	0.22811
443027	LOC443027	NC_056066.1:36988286-37228812	0	0.00425967	-8.66846	0.00814873	0.22811
443332	GRP	NC_056076.1:58543313-58556389	0.0708503	0	8.75666	0.00817126	0.228486
101102494	EPM2A	NC_056061.1:70122868-70236924	2.19576	0.858107	1.58779	0.0081992	0.228998
101111284	CCDC69	NC_056058.1:60218505-60266709	41.8554	12.9347	1.91282	0.00821049	0.228998
101104095	FREM3	NC_056070.1:14321612-14425153	0	0.009589	-8.64004	0.00821696	0.228998
101105924	OSR2	NC_056062.1:78239081-78246804	0.308006	2.11833	-2.70239	0.00825757	0.229619
101104338	ELF5	NC_056068.1:63832652-63865794	7.8748	3.46563	1.36394	0.00826997	0.229709
101111623	AFF3	NC_056056.1:101191907-101816375	1.30003	3.89572	-1.52717	0.00835185	0.231471
101120382	PSAT1	NC_056055.1:58587858-58615763	7.50789	2.47434	1.759	0.0084011	0.232322
101104466	RNF19B	NC_056055.1:234698132-234720714	9.34516	20.0895	-0.991135	0.00842445	0.232711
101112325	PPDPFL	NC_056062.1:32951627-33006153	1.34838	0.498894	1.71455	0.00844673	0.232944
101102280	CRYM	NC_056077.1:19547756-19569907	7.6547	70.1242	-3.12059	0.00846021	0.232944
106991220	DOK7	NC_056059.1:116102729-116137799	0.0255793	0	8.652	0.00846073	0.232944
101112115	LOC101112115	NC_056080.1:141963853-142461453	0.0172307	0.10881	-2.27402	0.0084735	0.23304
101114420	TFCP2L1	NC_056055.1:186531955-186601787	2.02777	0.437767	2.4852	0.00852833	0.234291
101103235	PRDM6	NC_056058.1:28306677-28417656	0.375397	1.34955	-1.71392	0.00854051	0.234369
101113828	PCSK1N	NC_056080.1:56230821-56235350	6.71967	1.71182	2.13192	0.00857549	0.234794
101119614	GLRA3	NC_056055.1:105968386-106151898	0	0.0159167	-10.0442	0.00858409	0.234794
101123033	TRIM17	NC_056058.1:2394644-2400369	0.433845	0.00780833	5.95997	0.00864059	0.236069
101120990	EDA	NC_056080.1:62551045-62939777	2.61053	9.09802	-1.7765	0.00864954	0.236069
105605961	LOC105605961	NC_056063.1:70898251-71036469	0.00640667	0	8.48794	0.00868496	0.236201
101104753	ANKRD31	NC_056060.1:6547074-6679893	1.23169	0.238598	2.08518	0.00868684	0.236201
101119350	SLC22A18	NC_056074.1:45070345-45092949	5.01263	0.393442	3.88342	0.00870987	0.236201
100820742	GPX1	NC_056072.1:50800769-50801894	94.5754	42.3727	1.32087	0.00871088	0.236201
101122406	MUC20	NC_056054.1:191308436-191324124	3.45864	0.755005	2.42811	0.00872123	0.236227
101109685	HADHB	NC_056056.1:33463788-33492678	252.627	137.815	1.04852	0.00875778	0.236386
106991840	LOC106991840	NC_056074.1:38761229-38762985	342.796	166.014	1.26446	0.00876271	0.236386
101108409	CDNF	NC_056066.1:28814971-28835850	8.52243	3.72545	1.38387	0.00876622	0.236386
101114529	MPC1	NC_056061.1:89070345-89083376	69.8369	27.5988	1.6074	0.00877422	0.236386
101102659	ATP6V1G3	NC_056065.1:76813399-76835015	0	0.049299	-8.63733	0.00878824	0.236509
101106856	ERICH5	NC_056062.1:79040079-79064558	0.0356793	0	8.48367	0.00881436	0.236958
101108353	NDUFB4	NC_056054.1:186171464-186177442	78.7304	40.9486	1.13936	0.00888856	0.238595
101119104	RORC	NC_056054.1:101735694-101759932	6.09395	1.8301	1.97929	0.00889427	0.238595
101123440	ASTN2	NC_056055.1:6272493-7305276	0.493105	0.193192	1.4671	0.00910113	0.243363
101119072	NAPA	NC_056067.1:54221344-54247273	30.6301	15.4245	1.19799	0.00911245	0.243383
101102447	LOC101102447	NC_056054.1:85822833-85867118	0.0191817	0	8.61977	0.00912759	0.243383
101122393	NDUFA10	NC_056054.1:1697189-1735956	56.3328	28.0378	1.21841	0.00913099	0.243383
101114232	STARD6	NC_056076.1:54059156-54079531	0	0.0196623	-7.28028	0.00916764	0.244101
101113001	LOC101113001	NC_056067.1:495642-500172	334.61	176.749	1.10318	0.00921076	0.244729
101122138	LOC101122138	NC_056071.1:45674833-45741267	0	0.0142387	-8.521	0.00924907	0.245487
105612764	C6H4orf54	NC_056059.1:25300427-25318330	0.0178777	0	7.19826	0.00927939	0.245877
101120717	KCNH8	NC_056054.1:277370563-277832669	0	0.00532067	-9.96922	0.00929119	0.245877
101122701	GRIK2	NC_056061.1:35144232-35877089	0.205955	0.0427893	2.50674	0.00929319	0.245877
101112874	FCRL3	NC_056054.1:108031635-108079933	0.027604	0.231065	-2.87175	0.00931996	0.245918
101113667	CHST11	NC_056056.1:173659322-173926379	1.21514	3.96818	-1.66721	0.00932091	0.245918
101120250	TMEM200A	NC_056061.1:55924744-56014144	0.407228	3.18728	-2.85855	0.00932414	0.245918
101106323	LOC101106323	NC_056058.1:15941191-15946417	44.8122	21.3296	1.2794	0.00934929	0.246322
101110067	REV3L	NC_056061.1:26246986-26421676	17.2255	35.8784	-1.0389	0.00937114	0.246639
101108049	BMP3	NC_056059.1:96511210-96543170	0.674944	0.065619	3.33356	0.00941964	0.247656
101113801	ACY1	NC_056072.1:49021236-49026123	28.3633	13.0978	1.2979	0.00943592	0.247824
101102609	PLSCR5	NC_056054.1:242496638-242518928	0	0.11649	-9.98004	0.00955956	0.250024
101112190	ABHD11	NC_056077.1:33994825-33997259	57.104	22.8874	1.55637	0.00958883	0.250494
101113851	LIAS	NC_056059.1:59299370-59315397	25.3219	12.4736	1.22505	0.00960516	0.250494
101111530	UBAC1	NC_056056.1:3452207-3471769	52	29.4301	0.984863	0.00961311	0.250494
101111594	PAOX	NC_056075.1:51240937-51249530	24.5923	12.2164	1.18062	0.00963744	0.250494
121820683	LOC121820683	NC_056064.1:17053339-17084867	0.0263097	0	8.39524	0.00973721	0.252219
101109361	SERINC5	NC_056060.1:11081472-11188615	9.89254	4.67638	1.2163	0.00974269	0.252219
101101985	NIPAL1	NC_056059.1:67407657-67431099	0.902368	3.12775	-1.6526	0.00978935	0.252773
101103696	TSPEAR	NC_056054.1:265158836-265330375	0	0.0148637	-9.95574	0.0097957	0.252773
101106714	ETFDH	NC_056070.1:40525605-40565257	40.9553	22.6153	1.04491	0.00987835	0.25416
541604	ISL1	NC_056069.1:27862846-27873820	0	0.091676	-8.68124	0.00987984	0.25416
101121559	BLOC1S2	NC_056075.1:20949062-20957750	38.7403	19.3544	1.2119	0.00994751	0.255386
101104057	ATP6V0A4	NC_056057.1:103837944-103908225	0.00434067	1.47653	-8.46164	0.00994786	0.255386
101122460	AP2S1	NC_056067.1:53697795-53707399	43.1506	22.5201	1.12048	0.00998012	0.255952
101110359	ALKBH3	NC_056068.1:72887338-72930236	15.1883	8.12762	1.04322	0.0100304	0.256717
101104681	CMTM4	NC_056067.1:33941276-34011674	1.90555	0.927481	1.17742	0.0100759	0.257457
443515	IGF1R	NC_056071.1:7199205-7503235	4.5619	10.0054	-1.03184	0.0100798	0.257457
114108861	GNB1L	NC_056070.1:72869765-72895088	19.7458	8.70753	1.23853	0.010142	0.258256
101108821	CHPT1	NC_056056.1:171077403-171105638	190.864	95.5273	1.18347	0.0101906	0.259031
101103525	ABCG1	NC_056054.1:263169079-263235929	10.6874	23.7437	-1.04324	0.0101968	0.259031
121820182	LOC121820182	NC_056061.1:26192741-26247328	0.0368573	0	9.77012	0.0102115	0.259031
105603294	ALPK3	NC_056071.1:21770100-21827414	1.36897	3.52167	-1.25898	0.0102164	0.259031
101111395	NDUFS6	NC_056069.1:70901068-70919341	110.616	41.8903	1.43241	0.0102241	0.259031
101117846	LOC101117846	NC_056059.1:113770344-113833930	0.337008	0.0156773	4.20035	0.0102542	0.259531
101120720	GSG1L	NC_056077.1:25852025-26106682	0.00872267	0	9.76184	0.0102797	0.259914
101117962	SORL1	NC_056068.1:31804213-31969781	10.0961	4.88661	1.26742	0.010327	0.260847
101115859	EEF1B2	NC_056055.1:208280819-208283817	227.835	129.971	0.956082	0.0103471	0.261093
101107962	CDC34	NC_056058.1:40852993-40859561	27.6781	13.4964	1.23273	0.0103793	0.261641
101114626	HOXB13	NC_056064.1:37525009-37530787	0	0.0551217	-7.00737	0.0104182	0.262358
101104791	USP40	NC_056054.1:7442807-7526111	179.534	88.4643	1.19133	0.0104555	0.263034
105606223	ATP5F1E	NC_056066.1:57042513-57046036	316.371	176.759	1.02437	0.0104962	0.263513
101116326	C1QTNF9	NC_056063.1:34532043-34539745	3.8225	0.917616	2.12673	0.0104993	0.263513
101122511	TMBIM6	NC_056056.1:136530531-136547134	409.278	211.85	1.14912	0.010506	0.263513
443451	ATOX1	NC_056058.1:60709910-60734089	98.46	46.9367	1.14991	0.0105421	0.264152
443257	IDH1	NC_056055.1:210312166-210332222	299.382	158.078	1.09623	0.0105618	0.264383
114116805	ACADM	NC_056054.1:51911804-52000694	40.1198	17.8351	1.42983	0.0106583	0.266266
101110156	KRT24	NC_056064.1:40649946-40654363	0.013463	1.171	-6.28724	0.0106769	0.266465
101115254	SATB1	NC_056054.1:276464224-276564452	16.644	8.47625	1.15855	0.0107102	0.266765
101105085	SPATA20	NC_056064.1:35901396-35909417	24.8436	11.1349	1.34674	0.010746	0.267126
101116329	AMZ2	NC_056064.1:61062565-61071053	26.4946	14.0203	1.10783	0.0108965	0.270332
101110086	HSD17B12	NC_056068.1:72701906-72870905	120.475	45.6278	1.6013	0.0109521	0.271175
101121958	RAB5IF	NC_056066.1:65689219-65696391	59.8011	31.8885	1.10442	0.0110186	0.272285
101118435	KCNH3	NC_056056.1:136692738-136711841	0.036473	0.531061	-3.57658	0.0110701	0.273289
101107858	SFRP4	NC_056057.1:51224818-51234927	63.5957	24.7379	1.39765	0.0111209	0.274003
101113436	BCR	NC_056070.1:71751417-71837118	8.05686	4.34506	1.06056	0.0112017	0.275452
101104413	MYOCD	NC_056064.1:30895362-30983745	0.110003	0.549157	-2.30757	0.0112258	0.275533
101116512	UBE2L3	NC_056070.1:72167909-72192722	77.4032	42.8178	1.04117	0.011227	0.275533
101120276	SYNE3	NC_056071.1:57989083-58092276	11.5651	24.9752	-0.971726	0.0112853	0.276695
101107979	GOLT1A	NC_056065.1:1811506-1823461	0	0.074983	-8.43311	0.0113483	0.277966
101105774	PDHX	NC_056068.1:64239807-64312448	15.5873	7.7039	1.2204	0.0113843	0.278576
101113047	SERTM2	NC_056080.1:123477201-123490783	0.017229	1.40893	-6.17447	0.011411	0.278855
101113187	NFKBIZ	NC_056054.1:167075595-167108353	7.11807	17.1363	-1.15707	0.0114242	0.278855
101110234	PGPEP1	NC_056058.1:4633842-4671062	25.5611	14.3818	0.984409	0.011429	0.278855
101108696	LOC101108696	NC_056073.1:25315729-25319802	2.98377	14.0666	-2.03575	0.0114599	0.27893
101117226	VGLL1	NC_056080.1:98674489-98697782	0	0.037689	-8.38645	0.0114654	0.27893
105610127	LOC105610127	NC_056077.1:38663964-38680540	5.3374	2.53502	1.24495	0.0115171	0.279457
101116871	CHCHD6	NC_056072.1:60184491-60275910	11.5302	6.31151	0.978476	0.0115206	0.279457
100217409	NFIL3	NC_056055.1:26459332-26472435	36.159	19.9022	1.03811	0.0115683	0.280343
101114410	TRABD2B	NC_056054.1:22286121-22507426	4.02959	14.9279	-1.79251	0.0117117	0.283271
101102527	LOC101102527	NC_056077.1:20211882-20237342	83.9614	44.2423	1.12821	0.011794	0.28451
101122540	DDRGK1	NC_056066.1:51712434-51722707	49.066	27.4557	1.02267	0.0117942	0.28451
101112944	BUD23	NC_056077.1:34025844-34037732	27.7165	15.2524	1.0474	0.0117969	0.28451
443439	TXN	NC_056055.1:13077929-13089814	264.29	149.459	0.981283	0.011844	0.285275
101118667	NEIL2	NC_056055.1:105535392-105545622	60.5929	33.0021	1.02973	0.0118554	0.285275
101122759	NR4A3	NC_056055.1:47974302-48017800	0.23651	1.57038	-2.76152	0.0119661	0.287208
114116620	LOC114116620	NC_056063.1:36307805-36316029	0.196812	0	8.46063	0.0120185	0.288191
121820610	LOC121820610	NC_056054.1:107245253-107275021	0.026685	0	8.28426	0.0121022	0.289922
101121129	NDUFV1	NC_056074.1:41864271-41870009	67.9772	34.2874	1.19805	0.0121332	0.290387
101118773	PDE1B	NC_056056.1:131999771-132026453	7.26956	21.1926	-1.4164	0.0121572	0.290683
101113599	LOC101113599	NC_056062.1:13694654-13696981	89.5635	42.9114	1.27041	0.0123273	0.294189
101105669	PCDH17	NC_056063.1:5465508-5579050	0.295439	0.873417	-1.52838	0.0123688	0.294899
101104760	LACTB2	NC_056062.1:47290182-47324422	29.9541	15.9277	1.12387	0.0124002	0.295088
101121670	TXN2	NC_056056.1:180530312-180540409	46.461	24.7247	1.1073	0.0124726	0.296249
101108484	NDUFA11	NC_056058.1:16319338-16324461	50.4234	25.7709	1.1622	0.0126048	0.298176
101117948	ADAM11	NC_056064.1:44223835-44244442	2.4684	7.5422	-1.40368	0.0126384	0.298234
100270719	UQCRH	NC_056054.1:20885822-20896099	274.169	150.401	1.06286	0.0126394	0.298234
101102177	OXCT1	NC_056069.1:32859591-33022906	97.3113	53.2092	1.06034	0.012657	0.298326
101120073	ASNS	NC_056057.1:15868108-16020359	17.9094	9.26561	1.08167	0.0126722	0.298326
101115830	CLMN	NC_056071.1:57779133-57898504	2.2987	4.71685	-0.980512	0.0126887	0.298326
101117805	SHANK2	NC_056074.1:43956383-44512310	0	0.00495633	-9.65377	0.0126982	0.298326
105606262	LOC105606262	NC_056064.1:50356576-50375838	14.4896	5.61486	1.51047	0.0127028	0.298326
101110091	CHCHD10	NC_056070.1:71272746-71275103	160.869	76.9071	1.27309	0.0127292	0.298393
100302083	CDKN1A	NC_056073.1:10676449-10684891	4.97988	1.60302	1.96398	0.0127295	0.298393
101106837	SDC1	NC_056056.1:28064394-28088659	8.89164	3.80106	1.36163	0.0127546	0.298702
101108795	RSRC1	NC_056054.1:229697762-230145616	25.0885	14.4845	1.0106	0.0128009	0.299048
101112159	CHST1	NC_056068.1:74616266-74635156	1.47421	5.11554	-1.67489	0.012805	0.299048
101116691	C22H10orf90	NC_056075.1:45424828-45669913	0.166671	0.059731	1.62825	0.0128051	0.299048
101113830	ASIC4	NC_056055.1:221432374-221459806	0.244674	1.14659	-2.13326	0.0128204	0.299114
101103564	NHP2	NC_056058.1:36949645-36953555	38.812	18.4393	1.27333	0.0129116	0.300578
101110444	GRIK4	NC_056068.1:30930887-31332190	0.086831	0.618594	-2.59041	0.0129186	0.300578
101110024	GHITM	NC_056078.1:38161189-38173853	165.78	90.3801	1.07244	0.0129679	0.301288
101122917	TNK2	NC_056054.1:191436264-191477631	10.7746	24.2504	-1.00247	0.0130285	0.302296
101113583	LOC101113583	NC_056057.1:10218526-10234978	30.963	14.7252	1.27454	0.0130649	0.302859
101106867	BPIFB6	NC_056066.1:61992888-62008457	0	0.058375	-8.39601	0.0131168	0.303781
101113882	CREB3L1	NC_056068.1:75216121-75254140	2.63191	9.78352	-1.88284	0.0131948	0.305306
XLOC_131967	XLOC_131967	NC_056080.1:81474075-81501886	19.738	10.1	1.176	0.0132141	0.305471
100037703	KIF5B	NC_056066.1:32695378-32742379	193.279	97.9047	1.16814	0.0132588	0.306148
101113754	PRR16	NC_056058.1:30798212-31079455	1.09895	2.50547	-1.19524	0.01328	0.306148
101108307	COL23A1	NC_056058.1:37021378-37402331	0.111871	0.498109	-2.18218	0.0132961	0.306238
101102301	NAV3	NC_056056.1:113764225-114151648	4.44961	10.8559	-1.23732	0.0133548	0.307259
101120124	GBE1	NC_056054.1:150045016-150352139	44.9309	25.9955	0.957854	0.013388	0.307259
101115434	NDUFS1	NC_056055.1:208246898-208280323	29.7199	15.8577	1.10994	0.0133961	0.307259
101113834	SLC16A7	NC_056056.1:159826758-160022886	67.8309	33.6113	1.21036	0.0134017	0.307259
100302744	CIB2	NC_056071.1:28306633-28332018	23.7437	12.7796	1.07993	0.0134301	0.30763
105612282	SMIM26	NC_056066.1:38182845-38184453	62.0054	29.5836	1.25655	0.0134757	0.308245
101111455	ATP5ME	NC_056059.1:118323163-118324638	318.538	178.107	1.02413	0.0135444	0.3094
101103212	HEMGN	NC_056055.1:49760039-49772084	0.022622	0	6.89164	0.0135779	0.309883
101121692	GAA	NC_056064.1:51829779-51845739	19.458	9.75091	1.19165	0.0136331	0.310645
100302636	KLF4	NC_056055.1:15685597-15689482	9.86079	27.1563	-1.37426	0.0136412	0.310645
105603272	ANKRD9	NC_056071.1:64886591-64889557	20.8209	8.18501	1.55601	0.0136745	0.310645
101114125	TMEM230	NC_056066.1:47037102-47044928	33.4709	17.8854	1.09443	0.0136763	0.310645
101117434	EIF2D	NC_056065.1:4186381-4207977	15.204	7.70942	1.1525	0.013698	0.310645
101117841	PFDN1	NC_056058.1:49029741-49173101	51.0645	29.8121	0.993626	0.0137996	0.312169
101112384	LOC101112384	NC_056056.1:218936771-219012528	9.23534	3.04366	1.68691	0.0138673	0.313351
101123617	GPR45	NC_056056.1:97281050-97321478	0.100678	0	8.23279	0.0139128	0.313892
101104108	NDUFS2	NC_056054.1:112643586-112652541	94.1645	54.1178	0.972106	0.0139194	0.313892
101116024	ARSD	NC_056080.1:5945085-5961419	12.6006	4.70763	1.59605	0.0139425	0.313919
443251	AQP5	NC_056056.1:136329377-136333209	0.399324	0.0100593	5.08406	0.013996	0.314809
443085	ALDOA	NC_056077.1:26727161-26732740	952.548	423.707	1.36864	0.0140197	0.314809
101120207	LOC101120207	NC_056054.1:99857809-99994847	1.72806	0.307643	2.42205	0.014164	0.317649
101119736	KLHL10	NC_056064.1:41762645-41775390	0	0.0225447	-6.8396	0.0142009	0.31774
443273	GRIA3	NC_056080.1:107219990-107531034	3.16279	1.26605	1.41106	0.0142143	0.317757
101118648	HEPHL1	NC_056074.1:257105-349458	0.00696167	0	8.2093	0.0142551	0.317986
101106891	GJB5	NC_056054.1:9796125-9799556	13.5149	2.91583	2.3584	0.0142825	0.317986
105611516	LOC105611516	NC_056059.1:72992484-73018074	14.5029	7.30135	1.14674	0.0142974	0.317986
100037663	GSTM3	NC_056054.1:87087458-87090690	140.917	51.3639	1.68175	0.0143248	0.317986
101107749	TLL2	NC_056075.1:17524422-17668578	0.0277877	0.145712	-2.23097	0.0143522	0.317986
101110370	TRERF1	NC_056073.1:15970722-16182898	0.711616	1.68551	-1.10728	0.0143581	0.317986
100217412	SLC25A3	NC_056056.1:168319727-168325837	191.287	107.306	1.02587	0.0143738	0.317986
101111606	DBI	NC_056055.1:184744151-184749271	311.028	144.627	1.3102	0.014402	0.317986
101112561	AOC1	NC_056057.1:115062914-115079819	11.0593	26.7173	-1.18172	0.0144155	0.317986
443467	AHR	NC_056057.1:26780710-26831471	3.69245	7.70177	-0.976765	0.0144193	0.317986
101118487	CTH	NC_056054.1:46195052-46218159	2.14897	0.761812	1.70774	0.0144196	0.317986
100620050	KCNMB4	NC_056056.1:149342595-149419631	3.78789	2.10956	0.974995	0.0144274	0.317986
114113689	PRRT1B	NC_056056.1:5241042-5270057	0.24933	0.0324177	3.0802	0.0144636	0.318206
101113484	NELL2	NC_056056.1:141750450-142151045	0.30912	0.127323	1.40927	0.0144789	0.318206
101103572	DMAC2L	NC_056060.1:41456449-41466712	43.1748	24.1318	1.10752	0.0144834	0.318206
101121851	NDUFB7	NC_056058.1:9548256-9552667	136.185	75.8238	1.03068	0.0144881	0.318206
101109520	AUH	NC_056055.1:26167212-26407527	37.2274	17.8019	1.13491	0.0146647	0.32096
101104786	EIF5	NC_056071.1:65727199-65735809	112.672	64.1905	0.980821	0.0147252	0.321731
101117635	EHHADH	NC_056054.1:202654806-202722993	36.1098	20.771	0.976953	0.0148462	0.323539
101104962	RGS3	NC_056055.1:10134430-10286911	9.88774	22.0276	-0.978595	0.0149089	0.324324
101120167	PLEKHG3	NC_056060.1:74917177-74962092	4.45057	11.1185	-1.21158	0.0149556	0.324433
101102712	SYT1	NC_056056.1:114928514-115562807	0	0.00281367	-9.50591	0.0149683	0.324433
101103116	ATP8B2	NC_056054.1:104581776-104603074	6.65334	15.0024	-1.09518	0.0149786	0.324433
101108531	MAP3K7CL	NC_056054.1:127589821-127635541	1.19886	3.57151	-1.4238	0.0150192	0.324785
101123239	CHRNA3	NC_056071.1:28788990-28806774	0	0.040556	-8.17289	0.0150208	0.324785
101113839	SEMA3E	NC_056057.1:38401126-38680384	0.109889	0.301998	-1.35952	0.0150698	0.325565
101109620	FBN1	NC_056060.1:59766618-60043865	68.644	164.259	-1.17257	0.015107	0.326088
114110104	ASCL2	NC_056074.1:45685760-45687628	0.426422	0	8.56116	0.0151823	0.32743
101107489	CC2D2B	NC_056075.1:17029823-17233229	11.4779	5.8227	1.08731	0.0152047	0.327632
101123195	ALPL	NC_056055.1:244918595-244983340	0.0423017	0.570672	-2.33224	0.0153321	0.329811
101123633	DKK2	NC_056059.1:18492309-18618733	1.98197	4.31762	-1.01649	0.0153971	0.330553
101112511	ACER3	NC_056068.1:55016625-55161250	29.4396	63.7996	-0.954927	0.0154143	0.330553
101116408	PSMB1	NC_056061.1:91713291-91734719	125.028	71.8089	0.988657	0.0154193	0.330553
101105007	XKR9	NC_056062.1:47328141-47353749	0	0.0286157	-8.11893	0.0154601	0.331144
101110008	PKNOX2	NC_056074.1:26050912-26345389	1.69278	5.06869	-1.5044	0.0154866	0.331428
101110331	NWD2	NC_056059.1:57533905-57557242	0.010376	0	6.75206	0.0155369	0.331846
101108882	SPSB4	NC_056054.1:248420784-248510055	0.248893	0.793327	-1.5691	0.0155557	0.331846
XLOC_065723	XLOC_065723	NC_056061.1:90154032-90164606	1.5413	0.187046	3.1567	0.015583	0.331846
101119285	GPC3	NC_056080.1:100911805-101363261	63.8091	162.217	-1.28969	0.0155863	0.331846
101111911	LOC101111911	NC_056070.1:71383132-71385840	20.1598	8.34145	1.46222	0.0155888	0.331846
101104345	CRYBB2	NC_056070.1:65494255-65508506	0	0.121843	-9.46793	0.0155987	0.331846
101118570	CZIB	NC_056054.1:27760392-27765828	59.8434	33.8608	0.993832	0.0156708	0.332534
101115785	PPP1R9A	NC_056057.1:12965342-13310001	0.51535	1.25692	-1.06262	0.0156857	0.332568
101102895	L3MBTL2	NC_056056.1:218194658-218212937	10.963	5.77903	1.12318	0.0157581	0.333527
101107188	LOC101107188	NC_056057.1:89816099-89823610	0.030502	0	6.73865	0.0157607	0.333527
101122642	ZNF644	NC_056054.1:68230742-68367867	9.20032	14.2838	-0.931408	0.0157708	0.333527
101118013	DYNC1I1	NC_056057.1:13804754-14212535	8.78896	4.66378	1.10172	0.0158589	0.335108
101108216	ARHGAP8	NC_056056.1:221218836-221271799	0.0798507	0.00314933	4.70608	0.0159156	0.335645
101117939	ENY2	NC_056062.1:67999185-68008638	46.3839	27.5948	0.905206	0.0159279	0.335645
101109937	NMNAT3	NC_056054.1:250012535-250135200	0.86907	0.32923	1.53532	0.015942	0.335645
100217408	ATP5PD	NC_056064.1:55718247-55737061	141.916	72.6295	1.04037	0.015957	0.335645
101118385	CDH12	NC_056069.1:51231936-51722903	0.00349733	0	9.33968	0.0159643	0.335645
101111824	WFDC8	NC_056066.1:74386263-74410245	0.0738517	0	9.4952	0.0159646	0.335645
101122907	LAMTOR2	NC_056054.1:106086574-106089630	64.6348	34.3629	1.08669	0.0159925	0.335806
101102915	GRIN2C	NC_056064.1:55882720-55899248	0	0.021969	-6.87738	0.0160897	0.337023
101103555	POLR2F	NC_056056.1:215577118-215585796	40.4861	23.2862	0.98129	0.0160977	0.337023
101116273	LOC101116273	NC_056075.1:24489942-24502582	52.9607	30.9387	0.95582	0.0161037	0.337023
101105056	BZW1	NC_056055.1:203216597-203231806	112.82	62.5623	1.05582	0.0161231	0.337023
100125618	MT4	NC_056067.1:23571774-23574369	0.243198	0	8.21142	0.0161242	0.337023
101109649	FKBP3	NC_056071.1:52665216-52675501	47.5694	24.4926	1.16914	0.0161509	0.3373
101111516	PPIF	NC_056078.1:34155271-34162246	4.1159	1.14889	2.05123	0.0162384	0.337876
114117899	LOC114117899	NC_056067.1:51022212-51037757	0	0.043799	-8.08872	0.0162673	0.337963
101107541	LOC101107541	NC_056066.1:42906903-42920658	0.281166	0.00802767	5.26248	0.0163062	0.33813
443390	OXT	NC_056066.1:51828205-51829108	0.126586	6.23663	-5.5046	0.016312	0.33813
101102513	STK33	NC_056068.1:43667255-43866580	0.103327	0.0205843	2.46376	0.0164829	0.340829
101108206	TTC7A	NC_056056.1:77278984-77394176	2.45651	5.96864	-1.22039	0.0164984	0.340867
101101970	DNAJC22	NC_056056.1:136888994-136892327	0.213927	0	8.30051	0.0165468	0.341105
101120414	SPTB	NC_056060.1:74966525-75091594	0.693043	0.28285	1.52217	0.016604	0.341923
101111352	FAM131C	NC_056055.1:249727202-249734142	0	0.114104	-8.3404	0.0166375	0.342331
121818340	LOC121818340	NC_056080.1:81641732-81692151	0.028591	0	9.29535	0.016653	0.342369
101107225	GAS2L1	NC_056070.1:68594693-68600099	22.8305	10.961	1.26239	0.0167338	0.343309
101109896	SLC25A34	NC_056065.1:51128627-51132982	21.6742	49.9277	-1.04111	0.0167558	0.343309
101113594	DMGDH	NC_056060.1:10041506-10112577	0	0.00984667	-7.97049	0.0167672	0.343309
101108008	NDUFB5	NC_056054.1:208280242-208295660	43.8749	25.025	1.0051	0.0168247	0.344206
101108300	ST6GAL2	NC_056056.1:61153418-61210966	0.099728	1.31102	-3.77871	0.0169773	0.346404
121819227	LOC121819227	NC_056056.1:213406345-213541093	0.0978957	0.270647	-2.0994	0.0170023	0.346404
443547	EGR1	NC_056058.1:47499104-47501425	0.751271	4.63399	-2.50405	0.0170285	0.346404
101106478	SFXN4	NC_056075.1:38840512-38857953	8.32053	3.60699	1.39256	0.0170288	0.346404
101105870	TFDP2	NC_056054.1:247418598-247622083	31.524	16.3101	1.11941	0.0170868	0.347301
101117115	RAD54L2	NC_056072.1:49237986-49324938	5.44119	11.3138	-0.944157	0.0171556	0.348137
101118909	C21H11orf54	NC_056074.1:632719-660969	15.1469	8.98987	0.932099	0.0171914	0.348151
101122598	GUK1	NC_056058.1:2752549-2762230	41.9648	22.2358	1.07416	0.0171922	0.348151
101115193	ZEB2	NC_056055.1:165526715-165662761	31.5038	63.0787	-0.878204	0.017198	0.348151
114108618	LOC114108618	NC_056071.1:56488907-56494576	16.4999	43.1225	-1.21934	0.0172591	0.348169
101122774	CACNA1B	NC_056056.1:20405-230983	0.00146633	0.0370613	-4.61368	0.0172717	0.348169
101106422	INSIG1	NC_056057.1:118718227-118731421	42.4216	22.274	1.13517	0.0172721	0.348169
100307046	PRDX2	NC_056058.1:11032406-11035431	90.9029	47.773	1.08809	0.0172785	0.348169
101104568	LOC101104568	NC_056056.1:179479641-179488350	33.1268	73.4835	-1.00625	0.0173199	0.348169
101106352	ADA	NC_056066.1:72989140-73015044	7.51324	23.6954	-1.64636	0.0173459	0.348169
101118617	NFATC4	NC_056060.1:20615525-20627692	2.61192	7.82111	-1.49319	0.0173515	0.348169
105604868	SRRM3	NC_056077.1:34727844-34781579	0.0104913	0	8.00493	0.0173649	0.348169
101114471	ENTPD3	NC_056072.1:13239097-13272524	0.246599	0.00743	5.18263	0.0173668	0.348169
114114909	LOC114114909	NC_056058.1:83930056-83932317	233.269	118.147	1.1945	0.0173963	0.348169
101112563	LOC101112563	NC_056058.1:12648307-12663102	7.10141	3.2706	1.29876	0.0174013	0.348169
101106728	SPTBN2	NC_056074.1:41131258-41172142	9.94923	22.5406	-1.01815	0.0174042	0.348169
101107793	TBCA	NC_056060.1:8853919-8937792	101.893	59.9056	0.941828	0.0174071	0.348169
100620048	B4GALT1	NC_056055.1:37999928-38050358	23.2076	47.8014	-0.954822	0.0174957	0.349662
443024	AQP2	NC_056056.1:136344087-136352363	0.567183	0.0546593	3.53243	0.0175424	0.350318
101115835	HIVEP1	NC_056073.1:43479638-43615643	1.87792	3.90513	-0.938543	0.0175769	0.350687
101113825	SLC40A1	NC_056055.1:119775876-119800673	119.795	68.1897	0.98407	0.0175889	0.350687
101105011	TEX2	NC_056064.1:48097801-48208888	23.1969	13.9342	0.896103	0.0176364	0.351356
101105533	LOC101105533	NC_056070.1:55364419-55402649	5.74687	3.54951	1.1774	0.0176598	0.351446
101122147	FNDC7	NC_056054.1:86048498-86079041	0	0.0242647	-8.16559	0.0176756	0.351446
101114221	ATP6V0B	NC_056054.1:18615776-18619076	85.7468	49.2508	0.976585	0.017683	0.351446
101113687	PCYT2	NC_056064.1:50481881-50489089	14.5584	6.88183	1.29605	0.0177508	0.352349
121818210	LOC121818210	NC_056080.1:14729496-14807899	0	0.00873633	-7.99162	0.0177684	0.352349
101113394	EXTL1	NC_056055.1:240792566-240811020	0.498265	0.097763	2.50455	0.0177958	0.352349
101109586	GALNT17	NC_056077.1:29619831-30047792	0.035134	0.613904	-4.08227	0.0178163	0.352349
114117237	LOC114117237	NC_056065.1:50263472-50315454	15.1624	5.55292	1.11543	0.017829	0.352349
101118086	LOC101118086	NC_056080.1:79695974-79748407	0.0302217	0	9.22293	0.0178379	0.352349
101110939	LOC101110939	NC_056059.1:25327067-25380955	0.231806	0.0181877	3.87318	0.017951	0.354247
101119865	ATRNL1	NC_056075.1:35088239-35891208	17.7269	8.0099	1.31276	0.0181844	0.357523
101105488	EDF1	NC_056056.1:1008840-1012348	118.594	65.6502	1.04782	0.0181922	0.357523
101121985	OLFML3	NC_056054.1:91305977-91308979	19.8422	71.8687	-1.79218	0.0182075	0.357523
101119448	SERINC2	NC_056055.1:235982139-235997618	30.7612	10.9781	1.66162	0.0182117	0.357523
101119395	HTRA3	NC_056059.1:115300948-115330303	13.7923	49.0328	-1.82139	0.0182168	0.357523
101112046	ARNTL2	NC_056056.1:188041159-188148469	8.48765	4.39941	1.12767	0.0182895	0.358231
101104684	DNAJB13	NC_056068.1:52109925-52122494	0	0.0508827	-8.00358	0.0182957	0.358231
100126866	TERT	NC_056069.1:71190615-71208135	0	0.013968	-6.66475	0.0183411	0.35856
101115992	SDF2L1	NC_056070.1:72150749-72152697	13.4644	4.17672	1.88555	0.0183916	0.359266
101118946	UNC5A	NC_056058.1:35995367-36059780	0.398347	0.029901	3.95084	0.0184231	0.359429
101121152	LYPD6	NC_056055.1:159956255-160097831	0.373364	1.87578	-2.30649	0.018437	0.359429
101109965	LONP1	NC_056058.1:16430039-16448548	30.6209	17.7751	0.96747	0.0184532	0.359429
101118961	LY6D	NC_056062.1:14582337-14583984	3.30323	0.155781	4.49142	0.0184573	0.359429
101104317	ANGPTL4	NC_056058.1:14749117-14755646	40.7307	90.809	-1.06785	0.018511	0.360196
101121750	TMSB15B	NC_056080.1:129483467-129486860	0.474308	4.78145	-3.25448	0.0185985	0.361337
101113555	PCCB	NC_056054.1:253552200-253646933	71.1757	39.8959	1.02724	0.0186727	0.361938
443534	LOC443534	NC_056057.1:94149045-94165288	256.574	86.1139	1.78007	0.018755	0.362804
101105703	PLCE1	NC_056075.1:15049874-15426052	0.765139	1.60516	-0.987518	0.0187607	0.362804
443093	GOT2	NC_056067.1:26034216-26056500	28.7426	16.468	0.985173	0.0188029	0.363059
101106822	PCBD1	NC_056078.1:26301443-26306366	57.7805	30.9151	1.10781	0.0188372	0.363441
101105711	PMM2	NC_056077.1:8199912-8225461	16.3873	9.10242	0.987907	0.0189516	0.364807
100305130	ATP5PO	NC_056054.1:122293924-122300869	223.664	128.415	1.0014	0.0189808	0.364943
101116433	MST1R	NC_056072.1:50404957-50418324	4.37149	11.8001	-1.34589	0.0190095	0.365052
101120554	XK	NC_056080.1:37028663-37080002	3.49577	1.81455	1.14063	0.0190225	0.365052
101102253	RFLNB	NC_056064.1:22162335-22170903	20.9475	11.1525	1.02882	0.019048	0.365261
101112365	MGST3	NC_056054.1:117706042-117728061	117.535	70.9736	0.904588	0.0192454	0.366179
101118565	FKBP5	NC_056073.1:9703220-9821793	37.2777	21.7014	0.973511	0.0192679	0.366179
105608759	ACYP2	NC_056056.1:69744427-69931106	25.049	9.29022	1.62359	0.0192771	0.366179
114108810	TMEM132D	NC_056070.1:47250295-48145518	0.0499187	0.006934	3.00244	0.0192857	0.366179
101117690	LOC101117690	NC_056066.1:78172606-78197846	27.6993	15.4759	1.03467	0.0193309	0.366264
101115995	NUDT3	NC_056073.1:8493062-8607772	22.062	12.8788	0.948386	0.0193437	0.366264
101104263	LOC101104263	NC_056067.1:64083054-64109427	0	0.0244687	-8.04659	0.0193451	0.366264
105603822	ARMH2	NC_056073.1:32013851-32016894	0.0839897	0	6.9173	0.0193485	0.366264
101108949	LOC101108949	NC_056068.1:80831365-80861141	0.872604	0.192062	2.52721	0.0193867	0.366674
101115921	MPC2	NC_056054.1:120139242-120333247	74.7658	44.6937	0.934954	0.0193994	0.366674
101120448	LOC101120448	NC_056073.1:33808814-33829193	0.0245353	0	7.85623	0.019483	0.367976
101109543	LRRC74A	NC_056060.1:86246792-86275847	0.018993	0	7.85416	0.01952	0.368398
101118048	PSMA1	NC_056068.1:37963529-37977202	80.083	47.7682	0.927842	0.019557	0.368577
101107727	POU2AF1	NC_056068.1:21327413-21353017	0.0940893	0.698668	-2.48934	0.0195649	0.368577
101109532	PALS2	NC_056057.1:72765800-72887264	1.43321	3.20369	-1.09512	0.0195864	0.368577
101123646	AFMID	NC_056064.1:53287427-53309522	0.30518	1.22345	-1.88608	0.0195883	0.368577
101102228	CRHR2	NC_056057.1:67184036-67228815	3.93256	0.610459	2.58113	0.0197259	0.370334
101106197	KCNJ14	NC_056067.1:54889730-54895223	0.822088	4.13444	-2.32343	0.0198278	0.371933
101123543	BEST3	NC_056056.1:150056304-150110672	0.024688	0	9.26137	0.0199672	0.374024
101102871	PPP1R3B	NC_056079.1:24323792-24335286	17.6589	9.0815	1.16713	0.0200318	0.374396
101121880	MICAL2	NC_056068.1:40125898-40366809	2.43148	1.41056	0.880404	0.0201287	0.375646
101118809	SLC7A6OS	NC_056067.1:35235986-35242355	34.8392	18.9494	1.07506	0.0201558	0.375669
101110906	CDC14B	NC_056055.1:29550311-29679640	5.5877	13.013	-1.12467	0.0201899	0.375948
101108154	ETHE1	NC_056067.1:51432107-51450365	29.0673	17.2604	0.896987	0.0202173	0.37618
101111039	TNFRSF8	NC_056065.1:40822862-40894569	0.033452	0.193304	-2.42165	0.0202429	0.376272
101120397	GREB1	NC_056056.1:20439410-20568243	2.32764	9.04097	-1.93547	0.0202679	0.376272
101109820	LOC101109820	NC_056065.1:79260589-79265764	26.2223	13.6463	1.12218	0.0203952	0.377808
100049064	HBB	NC_056068.1:48036944-48038412	386.377	52.6984	2.80014	0.0204478	0.378504
101113642	HDHD2	NC_056076.1:47129940-47176084	20.2769	12.0584	0.915301	0.0205602	0.379701
101117068	PPM1H	NC_056056.1:156769622-157065084	4.80549	2.82261	0.95118	0.0205731	0.379701
105609918	LOC105609918	NC_056062.1:77369527-77379105	452.15	250.393	1.03975	0.0206352	0.380568
101103553	OTOGL	NC_056056.1:116238761-116413313	0.141673	0.40637	-1.37354	0.0206639	0.380818
101114222	FOXRED1	NC_056074.1:27076716-27084610	9.34244	4.25013	1.34956	0.0208055	0.382864
101101900	FREM2	NC_056063.1:23547608-23708803	0.00255267	0.059359	-4.61173	0.020822	0.382887
101113296	SLC35G2	NC_056054.1:252953405-252991528	3.43611	7.39495	-1.00008	0.0210545	0.38603
101122862	HADH	NC_056059.1:17565219-17608867	151.972	88.2135	0.964354	0.0210848	0.386177
101116755	LOC101116755	NC_056067.1:2108635-2207713	32.926	20.5105	0.842835	0.0210933	0.386177
101115175	LOC101115175	NC_056077.1:2263555-2264760	17.8537	4.97915	2.04444	0.0211411	0.386649
100270716	SLIRP	NC_056060.1:86997618-87003425	88.2661	52.4658	0.934034	0.0211499	0.386649
105612387	ZNF750	NC_056064.1:49546051-49554864	0	0.0263357	-6.5692	0.0211949	0.386929
101109702	MICOS13	NC_056058.1:16456799-16458431	79.3828	36.2129	1.34085	0.0212187	0.386929
101106906	PTK2B	NC_056055.1:38360028-38498089	3.89161	9.60143	-1.18134	0.0212233	0.386929
101113259	LOC101113259	NC_056066.1:74199004-74205039	0.0871	0	7.84636	0.0212657	0.387028
101110491	PPFIBP1	NC_056056.1:187714227-187921190	25.7886	16.4432	0.878462	0.0212697	0.387028
101119143	RSPO2	NC_056062.1:69316960-69503711	0	0.008024	-9.19353	0.0212787	0.387028
101111509	DIPK1C	NC_056076.1:4226665-4244085	1.33927	0.408048	1.92224	0.0212966	0.387073
101108693	MUSTN1	NC_056072.1:48145500-48146641	49.7984	149.474	-1.46471	0.0213693	0.388113
780517	TNFSF13B	NC_056063.1:83018224-83049138	2.55144	6.80168	-1.35908	0.0214968	0.390146
114114084	LOC114114084	NC_056056.1:218980762-218985098	10.1661	2.33475	2.27575	0.0215459	0.390175
101102520	GLO1	NC_056073.1:12519528-12548197	61.6123	33.8519	1.04398	0.0215606	0.390175
101103601	MPIG6B	NC_056073.1:26666224-26670659	0.0390257	0.467093	-3.4583	0.0216334	0.391211
100302079	RAN	NC_056070.1:46338330-46341926	119.973	68.4189	0.988102	0.0217822	0.392769
100125623	PER3	NC_056065.1:44896108-44967409	4.7039	2.59707	1.13948	0.0218198	0.393164
101106507	MRPL35	NC_056056.1:58094959-58248185	22.2443	7.33615	1.01036	0.0218644	0.393685
101105152	DLD	NC_056057.1:50447464-50474365	58.1916	32.9473	1.0212	0.0219447	0.394846
101105665	TRAPPC3L	NC_056061.1:21361659-21447143	0.611423	0.362123	1.44174	0.021996	0.395486
443345	GJB2	NC_056063.1:36313168-36316714	0.616355	0.0250783	4.85838	0.0220372	0.395715
101107319	GRIK1	NC_056054.1:126682395-127150210	0.00274633	0	9.16888	0.0220403	0.395715
101103947	LOC101103947	NC_056055.1:9408756-9412169	0.163463	0	7.93379	0.0220591	0.39577
101118232	NDUFS5	NC_056054.1:13734297-13739585	224.867	135.357	0.92228	0.0221129	0.396258
101109370	LOC101109370	NC_056063.1:70746835-70868027	0	0.059761	-9.10747	0.0221593	0.396258
101110677	F2RL2	NC_056060.1:7861444-7869295	26.9317	13.0682	1.15977	0.0221623	0.396258
101114736	MRPL21	NC_056074.1:42644346-42654261	21.1188	11.3807	1.09227	0.0221791	0.396258
101120161	ECSIT	NC_056058.1:13590334-13604099	12.9249	6.41081	1.23217	0.02221	0.396384
114115282	LOC114115282	NC_056059.1:25706336-25736081	1.56697	0.081322	4.44716	0.0222198	0.396384
100141302	KCNK3	NC_056056.1:33838757-33875372	5.3476	2.4289	1.2742	0.0222651	0.39691
101110334	CIAO2A	NC_056060.1:44118406-44137023	46.2672	29.3283	0.85244	0.0223271	0.397676
101108763	SLC47A1	NC_056064.1:33737759-33766694	0.408519	0.0343307	3.77979	0.0223398	0.397676
101121160	BBLN	NC_056056.1:8100966-8104453	249.036	134.457	1.10357	0.0224588	0.399229
442998	PYGM	NC_056074.1:39436299-39448165	3.56795	1.25708	1.6685	0.0225314	0.400236
101109738	TSKU	NC_056068.1:54949398-54963113	4.1643	9.75583	-1.11747	0.0225938	0.400639
101103838	PIWIL4	NC_056068.1:15481691-15536894	0.008235	0	7.54367	0.022602	0.400639
101106662	NDUFB3	NC_056055.1:203415216-203425520	100.819	49.4146	1.2276	0.0226189	0.400655
443470	IGFBP4	NC_056064.1:40422939-40433168	50.2607	114.441	-1.11773	0.0226888	0.40161
114110560	ADAP1	NC_056077.1:42139581-42173673	12.5582	6.86049	1.03574	0.0227121	0.401739
101106281	TMX2	NC_056068.1:79753435-79762753	32.7399	19.3941	0.939861	0.0227662	0.402271
443091	MDH2	NC_056077.1:34698120-34710520	87.7004	49.2017	1.04188	0.0227743	0.402271
101109471	CCDC3	NC_056066.1:16754708-16843149	9.5372	4.22646	1.21136	0.0228287	0.402715
101123395	MTARC2	NC_056065.1:23455006-23492010	59.0976	30.0989	1.18213	0.0228316	0.402715
101107383	SPCS2	NC_056068.1:52943071-52969899	61.5076	37.0491	0.912208	0.0229084	0.403787
100302546	RCHY1	NC_056059.1:91095444-91112271	16.8073	10.0513	0.907215	0.0230274	0.404224
101103729	VGLL2	NC_056061.1:20736119-20744148	0	0.270598	-9.10793	0.0230445	0.404224
101112495	LOC101112495	NC_056064.1:52756043-52766060	43.4173	25.8826	0.882155	0.0230537	0.404224
101102321	MSI2	NC_056064.1:7785939-8192478	6.34212	3.18994	1.22176	0.0230623	0.404224
101114061	CUTA	NC_056073.1:7748571-7750188	75.516	40.1034	1.08339	0.0230716	0.404224
101114057	MMAB	NC_056070.1:63771503-63782734	17.5642	10.0119	0.984691	0.0230944	0.404224
105601846	CYP17	NC_056075.1:23148868-23155358	0.0650083	0.913377	-3.65829	0.0231914	0.405385
101109855	LRRC20	NC_056078.1:25708805-25785442	7.02	2.84651	1.50323	0.023193	0.405385
101104946	PSMA5	NC_056054.1:86652966-86673786	56.7683	34.9296	0.882098	0.0232534	0.405874
100192421	GNG11	NC_056057.1:12019057-12024014	282.09	175.017	0.842374	0.0232874	0.406186
101119819	SLC25A48	NC_056058.1:44890098-44938373	0.0242873	0	9.11205	0.02331	0.406195
101109224	CDKN2C	NC_056054.1:25430819-25436766	32.6928	17.7675	1.09333	0.0233203	0.406195
101106537	METTL13	NC_056065.1:38463716-38480586	4.3732	1.93913	1.38233	0.0233853	0.406761
114112680	LOC114112680	NC_056054.1:97893829-97969001	4.59105	0.154299	4.46036	0.0234695	0.407436
780458	ENDOG	NC_056056.1:7611895-7615484	5.05559	1.37801	2.09332	0.0234728	0.407436
114108860	MRPL40	NC_056070.1:72724857-72727369	34.3909	16.2612	1.29192	0.0235162	0.407907
101118381	CCKBR	NC_056068.1:46505544-46516712	0.0167797	0	6.39595	0.0236182	0.409142
101119721	LOC101119721	NC_056058.1:41647470-41650377	116.166	66.6837	0.992064	0.02362	0.409142
101104144	IMPDH1	NC_056057.1:94279609-94296373	14.6431	32.0093	-1.00844	0.0236371	0.409155
101117544	SLC22A8	NC_056074.1:37830849-37852185	0.0200667	0	7.63422	0.023697	0.409909
101102163	NEBL	NC_056066.1:21482742-21868578	3.07508	6.85909	-1.06538	0.0237467	0.41013
101107779	SLC48A1	NC_056056.1:138800498-138809122	48.0348	25.9634	1.09505	0.0237619	0.41013
101115290	CCL16	NC_056064.1:14194769-14199338	1.24364	0.162403	3.14832	0.0237752	0.41013
114110252	LOC114110252	NC_056054.1:255101244-255101755	87.8086	34.9822	1.54125	0.0237978	0.410237
101122879	VSTM2L	NC_056066.1:66790113-66828891	1.25985	0.445035	1.59618	0.023865	0.410574
101106176	ALDH6A1	NC_056060.1:83503937-83524337	37.3419	21.4154	0.997646	0.0238692	0.410574
101108006	C1H1orf226	NC_056054.1:113542584-113901597	1.14456	2.53671	-1.08203	0.0238828	0.410574
101118849	LOC101118849	NC_056078.1:42985740-43006170	26.4485	15.1378	1.00118	0.0239581	0.411546
101105895	ALDH4A1	NC_056055.1:247438645-247471825	11.9972	6.63385	1.05187	0.0239721	0.411546
121819523	LOC121819523	NC_056057.1:113787222-113790710	0	0.061917	-6.48556	0.0240288	0.411808
100190973	CDK5	NC_056057.1:115248050-115252245	17.2194	8.31379	1.21975	0.0240553	0.411808
100820746	ANKRD1	NC_056075.1:12356715-12366049	0.847527	0.08395	3.58268	0.0240632	0.411808
121817901	LOC121817901	NC_056077.1:35958328-35963467	0.083093	0	7.62572	0.0240641	0.411808
101118378	IRX5	NC_056067.1:22732744-22754351	7.82479	4.126	1.1526	0.0240695	0.411808
101104592	NADK	NC_056065.1:50239181-50258761	73.2123	42.5187	0.978199	0.0241231	0.412445
101122629	RNF175	NC_056070.1:4115318-4179103	0.0215017	0	8.92545	0.0241763	0.41251
106990092	LOC106990092	NC_056057.1:72335628-72341080	13.4538	5.51728	1.4042	0.024252	0.41324
101123468	PSMB5	NC_056060.1:21639487-21644701	73.1374	44.0166	0.910723	0.0242725	0.413309
101107386	LAYN	NC_056068.1:21542646-21567979	19.1469	40.6954	-1.01187	0.0244049	0.414719
101115069	CLGN	NC_056070.1:17354053-17399338	0.339433	0.083932	2.17112	0.0244632	0.415362
101109862	SRPX2	NC_056080.1:134153649-134185215	0.876062	2.87592	-1.50147	0.0244759	0.415362
101121885	TXNRD2	NC_056070.1:72901431-72928874	17.6172	10.5	0.924833	0.0245154	0.41575
101113242	TMEM63C	NC_056060.1:86544997-86620569	0.262666	0.0590567	2.23353	0.0245347	0.415797
114117324	LOC114117324	NC_056065.1:6434471-6720299	0.883714	2.03442	-1.05351	0.0246102	0.416795
101105836	MYOC	NC_056065.1:38371363-38385472	58.1706	28.9392	1.13602	0.0246856	0.417264
101120770	PFDN4	NC_056066.1:81674318-81686498	74.5209	44.664	0.928208	0.0246878	0.417264
101107087	PPP1R1A	NC_056056.1:131990885-131998935	11.715	4.03448	1.74948	0.0247473	0.417645
101103521	PRDX5	NC_056074.1:39063278-39066644	103.983	55.7808	1.08536	0.0247571	0.417645
101120592	HOXB6	NC_056064.1:37620034-37629140	2.84259	7.8637	-1.4325	0.0247603	0.417645
114110450	LOC114110450	NC_056076.1:33411592-33537732	4.54801	1.89491	1.60603	0.0248412	0.418623
443541	PGD	NC_056065.1:42416362-42430897	163.013	98.625	0.880869	0.0248517	0.418623
101110922	LOC101110922	NC_056056.1:94076915-94097312	0.629047	2.10869	-1.57764	0.0248823	0.418858
XLOC_058935	XLOC_058935	NC_056060.1:48035242-48231342	1.30608	0.449749	1.78632	0.0249214	0.419234
101123586	RTL1	NC_056071.1:63419225-63458732	0.0588013	0.357848	-3.12979	0.0249738	0.419526
114113798	LOC114113798	NC_056056.1:208811991-208822095	0	0.0510323	-7.5961	0.0249868	0.419526
101119365	MSMB	NC_056078.1:43030977-43041156	0.0408823	0	7.5799	0.0250057	0.419526
101107422	CD99L2	NC_056080.1:84662450-84804752	19.1349	10.9387	0.908802	0.0250354	0.419744
101119803	PSMG4	NC_056073.1:49548454-49591324	34.2406	15.4404	0.870666	0.0250592	0.419862
101119050	LOC101119050	NC_056060.1:20903451-20915230	62.1647	37.4915	0.895358	0.0251218	0.420591
101105363	PDE8A	NC_056071.1:21940084-22122373	27.6088	16.1508	0.98996	0.0251362	0.420591
101113564	ASDURF	NC_056055.1:119674572-119678919	15.2079	6.9566	1.30028	0.0251563	0.420647
101104447	DNAJC19	NC_056054.1:206869418-206875091	33.5656	19.098	1.00087	0.0251903	0.420935
101113127	PRAG1	NC_056079.1:23578818-23625060	2.37409	5.07643	-0.957259	0.0252607	0.421517
101120578	ODAM	NC_056059.1:86347063-86355911	0.052294	0	7.52578	0.025271	0.421517
101111413	ATP5F1A	NC_056076.1:46227193-46235727	315.935	187.66	0.945214	0.025434	0.422457
101119069	TP53INP2	NC_056066.1:64039813-64049430	4.88961	1.77821	1.58311	0.0254632	0.422457
101101996	OGFRL1	NC_056062.1:2705781-2725902	26.9441	55.1573	-0.895866	0.0254666	0.422457
101116716	SLC8A1	NC_056056.1:83647931-84106703	2.63061	5.14491	-0.857215	0.025657	0.425332
101116085	LOC101116085	NC_056068.1:46035682-46127555	14.2074	31.3086	-1.01959	0.0257576	0.426498
101118831	LOC101118831	NC_056054.1:80895900-80909365	1.10721	0.154421	3.02545	0.0258013	0.426498
114113763	LOC114113763	NC_056056.1:208096361-208155567	0	0.00833333	-7.54087	0.0258076	0.426498
101120172	NDRG1	NC_056062.1:21164803-21226080	31.808	67.5414	-0.985978	0.0258115	0.426498
101115970	SESN1	NC_056061.1:28369700-28482574	25.9905	50.6165	-0.837517	0.0258123	0.426498
101104179	DNAH5	NC_056069.1:59363782-59625732	0.100634	0.320555	-1.50315	0.0258575	0.426908
101108158	LRRC4C	NC_056068.1:69334460-70762495	1.49434	0.625724	1.39286	0.0258712	0.426908
100192424	PSMA6	NC_056071.1:43307209-43328273	87.1814	54.0107	0.872739	0.0259643	0.428164
101112732	WFS1	NC_056059.1:103615018-103659699	28.6496	15.2466	1.12323	0.0259996	0.428463
101108612	F13A1	NC_056073.1:47927227-48068069	20.6845	42.3585	-0.917125	0.0260608	0.428909
101116327	CARS2	NC_056063.1:84604584-84629731	23.0435	13.9316	0.905449	0.0261204	0.429608
101123362	LOC101123362	NC_056056.1:112324081-112492906	28.7908	14.3102	0.952507	0.0262254	0.430367
101105154	LOC101105154	NC_056057.1:94531774-94573809	1.07492	0.279231	2.08096	0.0262569	0.430367
101117023	MRPL14	NC_056073.1:17630437-17643012	69.6194	40.1499	0.927722	0.0262591	0.430367
101107651	TCERG1L	NC_056075.1:49599592-49792643	0.00632767	0	8.84456	0.0262634	0.430367
101102904	EVC2	NC_056059.1:104206897-104363628	1.94348	4.00696	-0.970556	0.0263132	0.430802
101112054	HSPA9	NC_056058.1:47566915-47582968	87.7433	50.9545	0.991014	0.0264195	0.431721
101115288	RPL21	NC_056063.1:32897310-32901540	968.595	591.34	0.858655	0.026421	0.431721
678679	CCL25	NC_056058.1:14486316-14514242	2.99864	0.892777	1.50826	0.0264964	0.432672
101110095	LOC101110095	NC_056072.1:51310969-51319531	60.6678	34.4068	1.02227	0.0265395	0.433094
101111715	IGDCC4	NC_056060.1:12301553-12340472	1.44554	5.18837	-1.86673	0.026563	0.433127
101118747	GOT1	NC_056075.1:20218190-20241353	9.11582	5.15928	1.00582	0.0265761	0.433127
101122427	CACNG2	NC_056056.1:180617874-180736165	0	0.010085	-8.92723	0.0266203	0.433565
101118746	RIIAD1	NC_056054.1:101652337-101660530	0.680266	0.047507	3.7888	0.0267009	0.434313
114113077	LOC114113077	NC_056055.1:75147329-75191194	0.0242303	0	8.97309	0.0267922	0.435516
101119978	PSMA2	NC_056057.1:79792752-79802609	84.1277	51.1823	0.906626	0.0268257	0.435779
101114834	CREG1	NC_056054.1:119743422-119758072	114.52	73.415	0.798193	0.0269527	0.437475
101107993	NDUFAF2	NC_056069.1:18369456-18545372	7.09287	2.76341	1.0129	0.026965	0.437475
105602077	C14H19orf73	NC_056067.1:55370778-55376702	0	0.0850603	-7.55098	0.0269995	0.437752
101104483	PRKAG2	NC_056057.1:115711189-116019529	5.73828	10.3239	-0.819051	0.0270932	0.438987
101119920	RALGPS2	NC_056065.1:59544776-59704300	6.71914	2.01023	1.74451	0.0271267	0.439246
101115453	CLCN1	NC_056057.1:107922466-107959090	0	0.0123133	-7.45016	0.0271513	0.439361
101103806	MARCHF2	NC_056058.1:14782324-14796585	41.438	25.4192	0.877015	0.0272647	0.440722
101106859	DHRS12	NC_056063.1:21520325-21563124	16.3315	9.32083	0.930433	0.0272717	0.440722
101121024	MAPT	NC_056064.1:45623449-45746160	0.687881	2.23857	-1.36584	0.0273264	0.441057
101117668	MRPL54	NC_056058.1:18008341-18010370	55.3622	28.0786	1.15808	0.027537	0.443216
101105737	RABL6	NC_056056.1:1032364-1051351	25.7679	15.7944	0.879066	0.0275591	0.443216
101113635	DDAH1	NC_056054.1:62357480-62504776	0.577264	0.285421	1.12644	0.0275663	0.443216
101108010	SNRNP25	NC_056077.1:661790-664192	40.099	20.0695	1.20215	0.0275884	0.443237
101119470	NDUFA2	NC_056058.1:49440788-49456228	48.0714	24.7996	0.980944	0.0276206	0.443237
101105877	DNA2	NC_056078.1:24038363-24075588	1.02913	0.323086	1.81171	0.0277469	0.444695
101108212	GUCY2C	NC_056056.1:200801691-200868884	1.80575	0.978148	1.07398	0.027807	0.444826
101111218	ADAM33	NC_056066.1:51231959-51246603	8.50913	17.6785	-0.964223	0.0278083	0.444826
101111067	SBDS	NC_056077.1:28838175-28843793	215.71	129.385	0.925386	0.0278357	0.444981
100913155	GABRB2	NC_056058.1:70506031-70815285	0.728738	0.281627	1.27527	0.0278965	0.445589
101108722	PIN4	NC_056080.1:64768314-64776912	41.6381	25.8831	0.863045	0.0279093	0.445589
101121123	UFD1	NC_056070.1:72735649-72749952	63.6322	38.5427	0.91236	0.0279964	0.446695
101118692	TSPAN17	NC_056058.1:35839290-35849784	24.2711	13.0966	1.10796	0.0280487	0.447103
101110949	HS6ST3	NC_056063.1:72672494-73405627	0.00136667	0	8.76795	0.0280847	0.447103
101115212	NEDD8	NC_056060.1:20753972-20762316	120.024	74.8036	0.850793	0.0280906	0.447103
101102538	DACH2	NC_056080.1:77746708-78444482	0	0.363308	-7.52708	0.0281155	0.447103
101123556	RHOBTB3	NC_056058.1:92675629-92737862	32.9288	69.0704	-0.932222	0.0281187	0.447103
101108532	PGAM1	NC_056075.1:18477628-18484316	162.523	93.897	1.00291	0.0281289	0.447103
101116863	LOC101116863	NC_056069.1:45062184-45063011	168.234	91.5768	1.01139	0.0281761	0.44757
101117520	PDE6G	NC_056064.1:50651076-50654345	0	0.0699973	-6.50388	0.0282219	0.447737
101115994	SLC22A14	NC_056072.1:11774706-11788336	0.15994	0.013819	3.65246	0.0282223	0.447737
101103930	APOBEC2	NC_056073.1:15013770-15027564	0.006016	0.133422	-4.46498	0.0282605	0.448059
101104692	GPD1L	NC_056072.1:6617541-6675362	11.6918	7.00145	0.928796	0.0283174	0.448678
101104843	LOC101104843	NC_056065.1:50274482-50315131	34.5601	21.4429	0.93376	0.0283594	0.448973
101105140	ZNF185	NC_056080.1:82952379-83018908	0.821214	0.121578	2.66395	0.0284254	0.449536
101104899	NAT8	NC_056056.1:95588167-95590415	0	0.0835863	-6.25853	0.0284818	0.449892
101120537	SLC51A	NC_056054.1:191644570-191660893	0.024915	0	7.59007	0.0284837	0.449892
100505405	PEG3	NC_056067.1:64793743-64816657	3.14523	7.09983	-1.0415	0.0285459	0.450122
101114163	EGLN1	NC_056078.1:3492162-3541578	41.311	25.7697	0.867802	0.0285616	0.450122
101109947	PHPT1	NC_056056.1:1022348-1023763	73.9939	38.2071	1.14745	0.0285914	0.450122
101108127	ALDH7A1	NC_056058.1:25016887-25066386	38.9356	23.8778	0.878842	0.0285924	0.450122
100125621	PLIN3	NC_056058.1:17109873-17131154	23.562	14.7785	0.827694	0.0286059	0.450122
101118186	KLF2	NC_056058.1:6465222-6467632	8.8512	25.7475	-1.41149	0.0287842	0.452207
101122711	RGS1	NC_056065.1:11888140-11892179	0.544929	3.09275	-2.35919	0.0288418	0.452391
101112562	DDA1	NC_056058.1:5583007-5590841	24.1025	13.657	1.01524	0.0288573	0.452391
101121271	PEX7	NC_056061.1:62098430-62174374	12.3671	7.67779	0.875549	0.0288584	0.452391
XLOC_103304	XLOC_103304	NC_056070.1:66933952-66974926	0.290879	1.48645	-2.15749	0.0291462	0.456333
101121122	TANGO2	NC_056070.1:72979097-73004818	25.4288	13.9314	1.02114	0.0291645	0.456335
101106198	TMEM9B	NC_056068.1:43338296-43356490	51.2182	32.3904	0.834162	0.029209	0.456735
101105151	WBP2NL	NC_056056.1:218836328-218888244	0	0.190564	-7.48234	0.0292284	0.456735
101116646	PHTF2	NC_056057.1:44833488-44967757	4.26195	8.42013	-0.922675	0.0292448	0.456735
101106606	KRT12	NC_056064.1:40794395-40801005	0.031585	1.03869	-5.08434	0.0292774	0.456873
101103554	MFNG	NC_056056.1:181508479-181524093	11.5468	26.0747	-1.04091	0.02929	0.456873
101121523	RTRAF	NC_056060.1:43084284-43100043	129.887	82.1442	0.839556	0.0293321	0.456981
101122299	MLYCD	NC_056067.1:9776413-9789734	11.6027	6.69342	0.96887	0.0294033	0.457438
101120193	MRPS36	NC_056069.1:10577728-10586814	23.1086	12.974	1.03602	0.0294134	0.457438
101106248	ANO4	NC_056056.1:170214791-170585805	0.276031	0.024918	3.5416	0.0294174	0.457438
101113286	CDON	NC_056074.1:26785135-26883446	14.0248	27.2682	-0.80772	0.0295659	0.459463
101110180	LIF	NC_056070.1:69263571-69280589	0.23536	1.78854	-2.3928	0.0296228	0.460062
101105372	PKP3	NC_056074.1:47257317-47266215	0.0203237	0	6.27972	0.029647	0.460152
101109718	CA4	NC_056064.1:12507631-12515358	4.46549	12.7636	-1.4018	0.0296798	0.460376
101113015	UBR7	NC_056071.1:55651884-55669364	16.8157	9.96253	0.952478	0.0297763	0.461588
101110195	LOC101110195	NC_056054.1:165686869-165756273	0	0.006169	-7.35383	0.029955	0.463499
101111843	REG4	NC_056054.1:97166705-97193167	0.0370843	0	8.85931	0.0300352	0.464333
101117250	UCHL1	NC_056059.1:60857878-60869866	5.28359	1.75853	1.63683	0.0300459	0.464333
101121805	WDR61	NC_056071.1:28495826-28517556	34.873	22.1682	0.824112	0.0303154	0.467012
101103188	TDRD9	NC_056071.1:66200722-66313276	2.51681	1.01486	1.35609	0.0303236	0.467012
101103782	SARAF	NC_056079.1:25392636-25412363	61.5788	38.354	0.865932	0.030331	0.467012
101119489	PARK7	NC_056065.1:44760111-44777054	124.052	74.5351	0.928583	0.0304023	0.467681
101120342	TMEM256	NC_056064.1:26974337-26975493	177.268	104.034	0.947934	0.0304314	0.467681
114110670	AUTS2	NC_056077.1:30265321-31470921	11.1795	24.8699	-1.09712	0.0304422	0.467681
101118483	PRKAR2A	NC_056072.1:51134151-51199846	101.893	62.2024	0.896413	0.030564	0.468626
105602375	DYNLT2B	NC_056054.1:191710933-191736753	29.9554	19.0841	0.816774	0.0305843	0.468626
443279	CHI3L1	NC_056065.1:750821-763781	54.2371	23.0048	1.44624	0.0305853	0.468626
101112943	LOC101112943	NC_056054.1:98043124-98088738	3.43124	0.597701	2.76021	0.0306703	0.469641
101114078	KPNA7	NC_056077.1:37559046-37585894	0	0.014862	-7.32679	0.0307165	0.470062
101105799	PPA1	NC_056078.1:25622835-25656522	16.1802	8.72088	1.08147	0.0308245	0.471427
101122010	CCDC88A	NC_056056.1:68640935-68761610	5.20687	9.80497	-0.804629	0.0308732	0.471884
101105654	CTXN3	NC_056058.1:24041367-24052229	0	0.0558943	-7.52181	0.0309184	0.472287
101115666	AVPI1	NC_056075.1:18675656-18683795	86.7635	49.1526	0.991521	0.0309518	0.472509
101115672	DOP1B	NC_056054.1:269076242-269206416	2.27392	4.4909	-0.855401	0.0309857	0.47274
101102993	MYCBP2	NC_056063.1:52760936-53032172	13.3797	24.9131	-0.775282	0.0310903	0.473628
101118065	LMO4	NC_056054.1:64441557-64458229	164.525	101.956	0.844775	0.0311006	0.473628
101120030	LOC101120030	NC_056054.1:50432486-50772209	0.0611137	0.164508	-1.27496	0.0311593	0.474235
101105842	GDAP1L1	NC_056066.1:72669012-72693549	0.00503	0.105814	-4.35518	0.0312278	0.4747
101108285	ATP5MC3	NC_056055.1:134921550-134924640	157.929	91.4221	0.990719	0.0312841	0.475268
101122616	TRIB3	NC_056066.1:60298959-60310436	4.41673	1.94742	1.40498	0.0314359	0.47684
101109130	LYRM4	NC_056073.1:48563014-48651423	16.3691	10.5355	0.801766	0.0314727	0.47684
101116112	COQ7	NC_056077.1:17383040-17396627	18.23	10.6704	0.972747	0.031494	0.47684
101108430	TINAG	NC_056073.1:6196520-6304071	0	0.009754	-8.74863	0.0314962	0.47684
101121274	DYNLL2	NC_056064.1:8575929-8583127	78.7739	49.5712	0.838047	0.0315016	0.47684
101112935	NDUFS8	NC_056074.1:41958200-41962201	75.5484	43.0606	1.01441	0.0315279	0.476877
101111440	LOC101111440	NC_056056.1:133959352-133971729	0.356243	0.0202627	4.22883	0.0315421	0.476877
101118984	MPPED2	NC_056068.1:59979833-60190748	2.65112	0.916432	1.53865	0.0316942	0.478889
101117284	TNFRSF21	NC_056073.1:20351069-20415150	20.8586	10.9214	1.08893	0.0317653	0.478997
101110048	RFX8	NC_056056.1:100136366-100188537	0.01803	0	8.79887	0.0317728	0.478997
101119532	CHRNA6	NC_056079.1:36838719-36852932	0	0.0294787	-7.42818	0.0317775	0.478997
101118846	LINGO4	NC_056054.1:101729048-101735133	0.625627	0.093383	2.94283	0.0317816	0.478997
101106744	PECR	NC_056055.1:218068201-218112884	20.616	12.6258	0.907652	0.0318716	0.479547
105616273	LOC105616273	NC_056054.1:7189190-7246859	0.0919657	0.009033	3.42213	0.0319688	0.480548
101117383	CCDC178	NC_056076.1:24149858-24529797	0.00275333	0	8.62964	0.0319765	0.480548
101104898	C3H9orf50	NC_056056.1:6895659-6902899	0.680809	0.117348	2.58604	0.0320269	0.480729
101122920	C26H8orf48	NC_056079.1:22567983-23087562	0.980933	1.92773	-1.70564	0.0321159	0.481605
101104072	DCBLD1	NC_056061.1:20478690-20556005	3.85736	2.30977	0.917247	0.0321943	0.482376
114108764	LOC114108764	NC_056056.1:208167527-208550471	0.452899	3.29307	-2.02941	0.0322717	0.482959
101114335	MCTS1	NC_056080.1:104926561-104936266	23.3172	13.4004	0.966861	0.0322962	0.483037
101116130	SGPP2	NC_056055.1:224588986-224744099	0.006696	0	8.61995	0.0323525	0.483485
101110110	SLC19A1	NC_056054.1:266029480-266091468	0.680224	2.24227	-1.75159	0.0323871	0.483532
101108729	SDHB	NC_056055.1:249215379-249247114	103.036	62.9832	0.893155	0.0324235	0.483787
443049	PDXK	NC_056054.1:264462662-264493143	16.4419	8.48068	1.13015	0.0325729	0.485438
101108368	PSMD14	NC_056055.1:148377538-148480140	37.9363	23.8703	0.857919	0.0326362	0.485907
101110282	TBX15	NC_056054.1:96425985-96550397	15.5707	9.81959	0.826836	0.0326431	0.485907
101102224	ZMYND19	NC_056056.1:399540-409648	11.8207	6.27559	1.08663	0.0326884	0.486294
101118912	PEA15	NC_056054.1:111237472-111247747	84.2414	170.068	-0.923532	0.0327235	0.486526
101122607	EMC2	NC_056062.1:68890003-68947496	44.8307	28.9542	0.818061	0.0328094	0.48712
101108959	ITIH4	NC_056072.1:48148993-48163993	1.80579	4.74821	-1.24005	0.0328216	0.48712
101123427	IVL	NC_056054.1:102885868-102888813	0.110358	0	7.2568	0.0328715	0.487571
101107392	ADAMTSL3	NW_024599827.1:740257-1122056	7.45598	15.2873	-0.89028	0.0329337	0.488204
101102857	LOC101102857	NC_056075.1:35087788-35888025	1.1804	0.692507	1.22518	0.0329959	0.488839
101109286	ARSG	NC_056064.1:60958196-61059829	9.95537	5.754	0.885555	0.0331568	0.490835
101118466	ST8SIA6	NC_056066.1:31140376-31284076	0.681864	0.171267	1.96835	0.0331698	0.490835
100125357	LOC100125357	NC_056054.1:112380459-112390834	0.031665	0	7.29403	0.033282	0.491914
101120549	GPM6B	NC_056080.1:11932241-12088289	40.0508	22.164	1.02654	0.0333212	0.491914
101103917	LOC101103917	NC_056067.1:54583075-54591176	0	0.0454767	-7.1763	0.0334922	0.493629
100135690	PSMB7	NC_056056.1:11423515-11480032	105.305	66.8823	0.83077	0.0334964	0.493629
101107025	ZBED3	NC_056060.1:8260985-8281126	3.55226	8.6315	-1.2083	0.0335654	0.494065
101106892	CMPK1	NC_056054.1:21860293-21895218	35.9308	23.0363	0.813175	0.0336032	0.494332
101117785	APOA1	NC_056068.1:27224306-27258309	10.9253	5.11282	1.17001	0.0336533	0.494779
101122026	IZUMO4	NC_056058.1:19239841-19242962	7.82786	2.59316	1.78874	0.0337011	0.495188
101113264	LOC101113264	NC_056067.1:14287955-14312814	10.6121	6.26987	0.93502	0.0337207	0.495188
101110624	ADAMTS17	NC_056071.1:5731126-6123238	1.39543	3.83249	-1.34376	0.0337956	0.495815
100189620	ME1	NC_056061.1:10392286-10601405	14.9072	9.52949	0.808268	0.0338029	0.495815
101118261	LDHB	NC_056056.1:194115852-194134183	499.12	309.606	0.88369	0.0339259	0.496853
443447	MYC	NC_056062.1:25733553-25738536	9.7443	21.9758	-1.0612	0.0339375	0.496853
101104797	LOC101104797	NC_056054.1:227146871-227147377	77.5612	25.3855	1.7909	0.0339397	0.496853
780527	SLC9A3R1	NC_056064.1:55965666-55982663	20.1828	11.5811	0.983698	0.0339637	0.496853
101109257	DYSF	NC_056056.1:93344288-93569839	10.6772	20.6629	-0.836772	0.0339925	0.496853
101120669	PCK2	NC_056060.1:20852807-20861068	36.386	21.3007	0.982638	0.0340305	0.497118
101104595	LOC101104595	NC_056066.1:67203758-67240919	0.486783	0.0784237	2.96948	0.0340905	0.497347
101104960	SUMO3	NC_056054.1:265393138-265402622	41.1703	26.1609	0.807457	0.0341056	0.497347
114115573	LOC114115573	NC_056054.1:62056380-62056793	43.9525	14.247	1.75005	0.0341852	0.498219
100135434	PLIN5	NC_056058.1:17411934-17423749	11.6872	5.30672	1.39796	0.0343672	0.499999
101114518	HOXA5	NC_056057.1:70470180-70505523	0.67102	1.72027	-1.36459	0.034503	0.501393
101109666	SNN	NC_056077.1:10887040-10896908	20.9326	11.6208	1.01464	0.034573	0.50212
101118007	RTCB	NC_056056.1:176617403-176639693	28.682	18.185	0.84172	0.0346365	0.50234
101110105	CRTAC1	NC_056075.1:18850416-18998150	1.62492	0.970131	0.877027	0.034688	0.50234
101109847	TPRG1	NC_056054.1:198815075-198975023	0.901832	2.09618	-1.13496	0.0346886	0.50234
100135448	ARNT2	NC_056071.1:24068959-24259265	0.705946	0.247798	1.57425	0.0347151	0.50234
121816554	LOC121816554	NC_056067.1:61450034-61458208	0	0.044717	-7.13768	0.0347225	0.50234
100192432	FCGR2B	NC_056054.1:113057183-113073971	2.62403	6.40404	-1.29062	0.0347381	0.50234
101106225	CARHSP1	NC_056077.1:8227436-8240575	38.222	24.0627	0.83887	0.0347484	0.50234
101111399	OSBPL10	NC_056072.1:6197777-6519599	0.480949	0.944319	-0.853803	0.0347689	0.502346
101117465	SLC7A14	NC_056054.1:217551585-217666538	0.002712	0	7.18257	0.0347942	0.502422
101112620	ATPAF1	NC_056054.1:21192321-21220349	18.169	11.5112	0.83355	0.0348342	0.502711
101109084	DRAM1	NC_056056.1:171275688-171316189	7.79154	15.892	-0.931731	0.0349519	0.503839
101101926	VOPP1	NC_056072.1:496514-664321	1.92511	3.92371	-0.932648	0.0349638	0.503839
101115615	CMAS	NC_056056.1:193717923-193733455	59.3433	35.5927	0.925477	0.0349879	0.503839
101104591	LOC101104591	NC_056065.1:37969551-37995258	0.0853917	0.00535867	4.17039	0.0350398	0.503839
100534645	UGT1A3	NC_056054.1:7254898-7383834	0.0715023	0.006434	3.65594	0.0350528	0.503839
121816777	LOC121816777	NC_056069.1:39503120-39649001	0.710377	0.361615	1.10497	0.0350731	0.503839
101103148	ACO2	NC_056056.1:218394497-218440034	61.4415	32.9347	1.12919	0.0350959	0.503878
101113110	UBXN1	NC_056074.1:37541410-37544022	78.868	47.6069	0.913982	0.0351807	0.504807
101110992	STYXL2	NC_056054.1:119225065-119292792	0.144652	0.0158633	3.27912	0.0352392	0.505357
100499499	WSB2	NC_056070.1:57178585-57198174	39.9509	25.709	0.812012	0.035532	0.509136
101108096	NAPG	NC_056076.1:42688457-42700490	32.7704	19.6505	0.922603	0.0355433	0.509136
101102287	OCA2	NC_056055.1:113216047-113555709	2.17105	0.851765	1.36606	0.0356095	0.509714
101110098	C20H6orf132	NC_056073.1:15865180-15919629	3.01416	5.80063	-0.828288	0.0356369	0.509714
101107652	GPR156	NC_056054.1:185793997-185903854	0.596773	1.41473	-1.08796	0.0356446	0.509714
101121959	PSMA7	NC_056066.1:54748193-54753756	110.303	69.293	0.857317	0.0357707	0.511226
100196903	IDO1	NC_056079.1:34382353-34395060	2.28983	7.51169	-1.55507	0.0358699	0.512306
101120910	HMOX1	NC_056056.1:179234915-179243214	17.3008	8.93257	1.16913	0.0359149	0.512306
101118630	KCNQ2	NC_056066.1:53874193-53922465	0.00712367	0	7.15381	0.0359459	0.512306
101116672	MAG	NC_056067.1:45289258-45305377	0	0.0253503	-7.2318	0.0359484	0.512306
114115721	LOC114115721	NC_056060.1:53732590-53733136	57.6853	15.8475	2.07811	0.0360498	0.51309
101108100	LOC101108100	NC_056054.1:114729232-114790242	0.617534	0.261873	1.36524	0.0360736	0.51309
780477	CLDN4	NC_056077.1:33940651-33942111	2.74254	19.331	-2.60818	0.0360881	0.51309
101123649	F5	NC_056065.1:36438119-36514359	0.849353	0.426274	1.18464	0.0361875	0.513961
101114319	LOC101114319	NC_056074.1:37585069-37586388	79.0001	42.0169	1.06467	0.0362151	0.514062
101111592	LMX1A	NC_056054.1:117169151-117341122	0.195163	0.449478	-1.11194	0.0363812	0.516128
101118583	FIS1	NC_056077.1:35894093-35897730	228.466	149.773	0.782596	0.0365018	0.516703
101102675	MARCHF11	NC_056069.1:57129929-57244979	0	0.008229	-8.59597	0.0365042	0.516703
101109291	PKP1	NC_056065.1:79185870-79226336	0.00410133	0.0898753	-4.11273	0.0365248	0.516703
101115344	PCYT1B	NC_056080.1:22841132-22985994	1.42017	0.731241	1.10848	0.0366529	0.518223
101108750	CXCL11	NC_056059.1:91656797-91658612	0.181735	1.71119	-3.03529	0.0367363	0.519094
101109723	ZNF385C	NC_056064.1:41907866-41966936	0.125007	0.628231	-2.35119	0.0367636	0.519094
114108774	LOC114108774	NC_056066.1:68732038-68733298	34.4902	14.0086	1.50791	0.0367766	0.519094
101107668	ELAVL2	NC_056055.1:92426299-92570987	0	0.00695633	-8.62343	0.0368818	0.520286
101112362	SEC22B	NC_056054.1:97566264-97588247	48.2862	30.5179	0.834731	0.03692	0.520298
101115592	ECI1	NC_056077.1:2284246-2297499	19.7525	12.0781	0.900776	0.0369557	0.520298
101110183	FBLN2	NC_056072.1:58245049-58308012	24.1676	47.7439	-0.872648	0.03697	0.520298
101114615	VTI1B	NC_056060.1:77601966-77618980	74.4674	48.8877	0.772844	0.0369775	0.520298
101107370	TEN1	NC_056064.1:54993364-55016625	22.2945	12.7953	0.984115	0.0370469	0.520298
101101927	EMC3	NC_056072.1:16761123-16776407	77.3536	49.9202	0.812347	0.0370486	0.520298
100381249	PSMA3	NC_056060.1:68604745-68629664	83.9097	53.273	0.84516	0.0371051	0.520656
101122748	NEDD4L	NC_056076.1:57505033-57875664	3.73325	7.40976	-0.893872	0.0371156	0.520656
443074	FGF10	NC_056069.1:30604216-30700637	2.78602	5.44154	-0.83462	0.0371537	0.5209
100294605	VCAN	NC_056058.1:80902349-81022166	10.7875	36.8101	-1.80963	0.0371746	0.520902
101115498	AS3MT	NC_056075.1:23219826-23246523	10.0211	5.98392	0.930857	0.0373925	0.523369
101108985	CENPU	NC_056079.1:14307794-14364169	6.25139	3.65361	0.938264	0.0374418	0.523768
101102801	C1QTNF6	NC_056056.1:181238079-181245343	1.82239	10.5492	-2.77327	0.0375495	0.524961
101102015	PPP2R5C	NC_056071.1:64310646-64450964	78.0348	47.0153	0.822686	0.0376384	0.525638
101113322	LRRN3	NC_056057.1:58800339-58840230	1.13096	0.26665	2.31365	0.0377838	0.527082
121816827	LOC121816827	NC_056069.1:70116769-70120275	0.985914	0.10003	2.9516	0.0378515	0.527378
100216440	PGK1	NC_056080.1:69207830-69230392	117.665	72.5703	0.887151	0.0378528	0.527378
101120899	TEX28	NC_056080.1:80158856-80166195	0	0.045067	-7.08418	0.0378681	0.527378
101110740	TLE1	NC_056055.1:55244976-55336967	1.69822	3.23207	-0.82607	0.0378998	0.527526
101114918	MBNL1	NC_056054.1:236079777-236298090	90.2406	58.0348	0.810014	0.0381374	0.529847
XLOC_057307	XLOC_057307	NC_056059.1:113646912-113673997	0.033365	0.622901	-3.93168	0.0381643	0.529847
101109283	CCDC42	NC_056064.1:28076977-28089965	0.022242	0	6.94939	0.0381706	0.529847
101114404	CBLB	NC_056054.1:171302227-171524028	3.11044	5.71102	-0.772206	0.0381721	0.529847
101115299	ATP5F1C	NC_056066.1:12207073-12220422	193.91	108.035	0.883555	0.0382557	0.530713
100302102	FH	NC_056065.1:34549833-34574613	44.4087	27.9798	0.858323	0.0383633	0.5318
101103145	C3H9orf78	NC_056056.1:6692570-6700894	33.8035	20.7797	0.87279	0.0383806	0.5318
101107434	SCUBE1	NC_056056.1:219900694-220029628	0.013759	0.080409	-2.55458	0.0383985	0.5318
101119185	TNFAIP6	NC_056055.1:158145022-158162886	4.12931	10.1149	-1.21591	0.0384189	0.5318
101115118	WDR86	NC_056057.1:115554383-115580506	1.93431	5.64768	-1.43954	0.0384721	0.532243
101102606	ACADSB	NC_056075.1:42315045-42353831	11.9962	7.32317	0.845532	0.0384949	0.532265
121818183	LOC121818183	NC_056080.1:66462233-66462782	76.7164	171.472	-1.02018	0.0385706	0.532432
101120794	ACSM4	NC_056077.1:18927452-18951401	0.0126207	0	6.94111	0.0386587	0.532606
101104429	TMEM154	NC_056070.1:5175905-5228028	1.02503	0.480033	1.83377	0.038667	0.532606
101107759	NIPSNAP2	NC_056077.1:28165414-28192745	69.9926	44.0391	0.849034	0.0386682	0.532606
101108502	ALDH3A1	NC_056064.1:33635681-33642959	0	0.0459797	-7.09809	0.0387172	0.532988
101109966	ARHGAP26	NC_056058.1:51461115-51943192	4.3245	7.70048	-0.79175	0.038812	0.533607
101112066	PLG	NC_056061.1:84315997-84364165	0	0.006823	-7.07604	0.038885	0.533607
101106589	SPRY4	NC_056058.1:50981334-50995741	3.77799	8.81675	-1.16517	0.0388878	0.533607
100170321	CDH2	NC_056076.1:29012499-29254079	1.73213	0.885108	1.06354	0.0388974	0.533607
101113030	ATP5PF	NC_056054.1:131264344-131310343	122.389	81.0342	0.869761	0.0389029	0.533607
101103677	AZI2	NC_056072.1:2773012-2807641	32.974	21.7146	0.773767	0.0389675	0.534089
101103093	ISCU	NC_056070.1:64525172-64531294	108.839	68.4134	0.832826	0.0390705	0.535209
114111781	LOC114111781	NC_056080.1:81777418-81778489	6.87733	1.39484	2.38541	0.0391808	0.535841
101120997	LOC101120997	NC_056056.1:110526473-110527131	0.40078	3.79166	-3.11756	0.0393285	0.537466
101107692	SULT4A1	NC_056056.1:220465545-220493349	0.010864	0	6.90248	0.0393761	0.537466
101109432	EMP1	NC_056056.1:202302391-202324006	114.9	213.862	-0.791252	0.0394347	0.537466
101107453	TTC19	NC_056064.1:33209095-33238417	14.6303	9.40538	0.90629	0.0394614	0.537466
101117783	WDR88	NC_056067.1:43044243-43094327	0	0.0198247	-8.49373	0.0394763	0.537466
106991909	TNFRSF17	NC_056077.1:11193570-11196859	0	0.102845	-7.01942	0.039479	0.537466
101114628	CCL1	NC_056064.1:15501057-15504355	2.85916	0.48255	2.67999	0.039481	0.537466
101113508	LOC101113508	NC_056064.1:29442436-29460610	14.3092	8.95608	0.855592	0.0394924	0.537466
101102428	LOC101102428	NC_056071.1:65930632-65954461	27.9785	18.0792	0.813522	0.0395475	0.537923
101102315	SLC35F1	NC_056061.1:19834992-20238454	0.134298	0.332085	-1.25461	0.0396307	0.538471
101105088	LRRC3C	NC_056064.1:40012259-40026983	0.0226373	0	7.0717	0.0396818	0.538873
101104733	PKP2	NC_056056.1:182513473-182604604	6.61941	3.97355	0.899855	0.0397334	0.539223
101111605	BCAP31	NC_056080.1:80545879-80574780	248.722	156.58	0.838866	0.039768	0.539223
101107502	SMIM27	NC_056055.1:101692431-101708650	53.1369	30.1413	0.868513	0.0397721	0.539223
101103333	CCDC47	NC_056064.1:47742546-47760114	63.0894	41.3692	0.781389	0.039872	0.540287
101117672	WDHD1	NC_056060.1:65527858-65697790	11.0484	6.72201	0.791943	0.0399726	0.541064
101110289	LOC101110289	NC_056054.1:231656897-231686288	6.55278	13.2783	-0.939059	0.0400114	0.541298
114110558	ELFN1	NC_056077.1:41642637-41704817	0.116894	0.0241377	2.48134	0.0401591	0.543003
101118205	PAPPA2	NC_056065.1:57084932-57407057	0.204087	0.360304	-2.41949	0.0401854	0.543066
114109674	ITPR3	NC_056073.1:7890377-7957633	2.05424	4.34828	-1.00499	0.0403428	0.544278
101110727	LOC101110727	NC_056077.1:36970393-37003067	0	0.0311847	-8.47505	0.0403727	0.544278
101107472	NEFH	NC_056070.1:68699310-68707062	0.0362923	0	7.05414	0.0403772	0.544278
101108803	LOC101108803	NC_056054.1:166075960-166369255	9.5909	20.5442	-1.01974	0.0403903	0.544278
101104645	CAPN14	NC_056056.1:37973303-38014267	0	0.00756667	-6.95643	0.0404053	0.544278
101108314	ARSB	NC_056060.1:9862274-10031230	16.7616	9.85466	0.948119	0.0405498	0.545517
101117647	C2H8orf74	NC_056055.1:104579893-104608691	0.026148	0	8.3597	0.0407071	0.546875
101109920	BPHL	NC_056073.1:49650036-49669979	43.5778	27.3078	0.873518	0.0407293	0.546881
100307044	FHL1	NC_056080.1:99017215-99081587	168.064	360.544	-1.01983	0.040792	0.54743
101114570	ATP5PB	NC_056054.1:88872604-88888114	99.4837	61.8295	0.882584	0.0410923	0.551164
101101990	LACTB	NC_056060.1:45097110-45112820	15.9582	10.0003	0.895749	0.0411543	0.551701
101116920	PRR15L	NC_056064.1:38241762-38247455	0.188584	0	6.98945	0.0413502	0.553735
101108908	SSBP1	NC_056057.1:106413409-106448438	7.41675	4.35082	1.00321	0.041492	0.555337
101104319	LRRC66	NC_056059.1:68510164-68539410	0.207878	0.0396317	2.4594	0.0415276	0.555464
443076	MET	NC_056057.1:53094867-53211763	5.19425	9.6739	-0.807632	0.0415457	0.555464
101112236	ZIC5	NC_056063.1:76051457-76068403	0	0.00859733	-6.01101	0.0416622	0.556428
443001	ACAN	NC_056071.1:19709246-19777443	0.172376	0.038985	2.24059	0.041905	0.558579
101102322	EPOP	NC_056064.1:39031297-39034551	0.761076	0.131168	2.73917	0.0419172	0.558579
XLOC_135309	XLOC_135309	NC_056080.1:66123212-66384755	5.21922	10.9759	-0.810659	0.0419346	0.558579
101116826	POLR2E	NC_056058.1:41256048-41260504	52.4219	32.7684	0.847274	0.0420574	0.559562
101103339	LOC101103339	NC_056066.1:66394601-66456301	9.47155	12.4073	-0.853164	0.0420976	0.559562
121818348	LOC121818348	NC_056080.1:94492146-94651322	0.670674	0.516142	1.09712	0.0421653	0.560164
101103690	NDUFV2	NC_056076.1:41929119-41947824	101.807	64.6646	0.844689	0.0422344	0.560489
101112701	ADAMDEC1	NC_056055.1:41313865-41336489	1.24461	5.02908	-1.89816	0.0425332	0.563497
101113339	FABP9	NC_056062.1:57743838-57747002	0	0.0941903	-6.92383	0.0425509	0.563497
101122836	NUDT11	NC_056080.1:54025514-54031677	0.914169	0.155768	2.81821	0.0426958	0.564782
101117147	TMEM17	NC_056056.1:45733097-45741340	18.6427	10.6081	1.02171	0.0427156	0.564782
121820316	LOC121820316	NC_056062.1:82324317-82377074	2.55684	1.42992	1.07721	0.0427799	0.564901
101103668	TREH	NC_056068.1:29045770-29057852	0	0.0259307	-6.91672	0.0427975	0.564901
101104118	NPTX2	NC_056077.1:37932982-37945080	0.024699	0	6.89383	0.042869	0.564901
101123282	CLHC1	NC_056056.1:68801547-68835937	3.66514	2.07731	0.975761	0.0428733	0.564901
101119399	PLAGL1	NC_056061.1:68546818-68602863	3.59429	7.21928	-0.912314	0.0428841	0.564901
101119960	HECW2	NC_056055.1:198456110-198907550	2.78731	5.01392	-0.726473	0.0429269	0.564901
101119286	INHBB	NC_056055.1:185665333-185671305	4.98348	12.0613	-1.20591	0.0429498	0.564901
101118175	TSPAN11	NC_056056.1:212323059-212395939	3.86623	2.0141	1.02895	0.042982	0.564909
101121977	ATG7	NC_056072.1:55260445-55528386	18.6058	11.3153	0.781884	0.0429954	0.564909
101114460	AARS1	NC_056067.1:1284762-1305548	37.538	24.2172	0.814697	0.0430701	0.565419
101123066	GP6	NC_056067.1:63157213-63169085	0	0.0257473	-6.94071	0.0430793	0.565419
101117008	DHTKD1	NC_056066.1:16069137-16106534	6.63123	3.94337	1.06867	0.0433375	0.568155
101120656	LRP1	NC_056056.1:162409831-162489815	100.433	182.555	-0.75531	0.0433558	0.568155
443318	IGF1	NC_056056.1:171766875-171847317	12.7539	38.3319	-1.63812	0.0433795	0.56817
101105882	S100G	NC_056080.1:14832092-14905801	6.89028	1.25094	2.46436	0.0434662	0.56819
101106628	COMMD4	NC_056071.1:31135431-31140977	41.1514	26.4755	0.793632	0.0434737	0.56819
101113390	ATG4A	NC_056080.1:127081625-127160522	9.91172	6.50539	0.779834	0.0434838	0.56819
101122162	MRPL50	NC_056055.1:21759427-21766932	13.5193	7.71935	0.99574	0.0434912	0.56819
101104376	PPEF1	NC_056080.1:16936082-17083708	2.07477	1.22174	0.972339	0.0434987	0.56819
101120131	ACSM2B	NC_056077.1:18630445-18682053	0.205734	0.045581	2.36493	0.043517	0.56819
101120615	CRYZ	NC_056054.1:50974444-51002973	40.7384	26.6579	0.788072	0.0437679	0.570871
443103	VEGFA	NC_056073.1:17277196-17296230	2.83832	7.09527	-1.13334	0.0438177	0.571018
101110023	MCCC1	NC_056054.1:204782521-204835946	19.8833	12.3753	0.875661	0.0438358	0.571018
100820756	SRD5A2	NC_056056.1:92129150-92179796	0.0161943	0	8.28191	0.0438479	0.571018
101105968	IMPA2	NC_056076.1:43267735-43289321	8.19109	17.2552	-0.985412	0.0438727	0.571018
443241	HR	NC_056055.1:43477833-43494705	1.98247	5.26253	-1.34788	0.0438949	0.571018
101118659	ABCD3	NC_056054.1:71539658-71615579	27.6091	18.1136	0.782052	0.0439157	0.571018
101111356	C3H12orf56	NC_056056.1:155540066-155624486	0.0948163	0.0123577	3.22967	0.0439524	0.571068
101121607	LOC101121607	NC_056060.1:80083511-80166088	34.6869	21.4082	0.7987	0.0439821	0.571068
101114632	MYO3A	NC_056066.1:25859778-26031351	0.0574313	0.340767	-2.35856	0.0440725	0.571576
101111396	LOC101111396	NC_056070.1:13531288-13647469	0.0465897	0.206057	-1.96426	0.0441274	0.571992
101118713	POLDIP2	NC_056064.1:19776808-19785218	43.5037	27.6444	0.845877	0.0442128	0.572095
100145872	CHCHD3	NC_056057.1:98155116-98437884	37.8897	24.8409	0.79465	0.0442182	0.572095
101106772	SRD5A3	NC_056059.1:71510171-71525804	14.7077	8.75617	0.934817	0.0442213	0.572095
114108602	LOC114108602	NC_056080.1:91477413-91480384	3.98504	0.807916	2.41832	0.0442266	0.572095
101114234	CSMD2	NC_056054.1:8418061-9101286	0.656179	1.79641	-1.32383	0.0443066	0.572834
101112742	NALCN	NC_056063.1:76919378-77221959	0.0787407	0.326065	-1.72162	0.0444044	0.573803
101103446	AGXT	NC_056054.1:828499-842416	0.0504593	0	8.25738	0.0444764	0.574314
101113829	AMMECR1	NC_056080.1:124959929-125075105	2.17629	4.0394	-0.888489	0.0445158	0.574355
101104074	SIAH3	NC_056063.1:16226008-16296054	0	0.011471	-8.36745	0.0445549	0.574524
105606206	TMEM74B	NC_056066.1:59605808-59612725	0	0.026273	-6.20111	0.0445747	0.574524
101112082	APOC2	NC_056067.1:52443468-52445930	0.987736	0.0798987	3.85354	0.0446026	0.574588
121816115	LOC121816115	NC_056065.1:14782978-14811675	0.420054	0.017111	4.90914	0.0446869	0.575017
101114506	ECRG4	NC_056056.1:60923775-60933218	4.86354	10.4614	-0.991644	0.0447047	0.575017
101114219	TRANK1	NC_056072.1:10624173-10718567	4.16745	7.89846	-0.850227	0.0447493	0.575296
101116013	GRAMD1C	NC_056054.1:179456962-179555378	14.7172	6.59804	1.38529	0.0447942	0.575559
101112329	CPB2	NC_056063.1:16511397-16569953	0	0.0160373	-8.34739	0.0448157	0.575559
101120979	EFHB	NC_056054.1:278003280-278201150	9.28365	4.5468	1.1713	0.0448656	0.57561
101108022	SCML2	NC_056080.1:16524745-16637430	1.49844	2.82735	-0.803808	0.044911	0.575898
101122554	CDK2AP1	NC_056070.1:52347967-52358411	12.2518	6.89144	0.980024	0.0449624	0.576264
101112143	ADCK5	NC_056062.1:13512750-13526317	4.22517	7.58719	-1.08118	0.0452423	0.578535
443267	SLC14A2	NC_056076.1:45298765-45794210	0.00244467	0	8.23363	0.0452772	0.578535
101116316	CPEB2	NC_056059.1:110823817-110900290	24.0464	14.1223	0.964586	0.0453364	0.578763
101109162	TMEM106C	NC_056056.1:138620358-138625883	9.90011	4.34602	1.34201	0.0453631	0.578763
101113992	ADI1	NC_056055.1:1910619-1918871	88.0761	57.8539	0.786329	0.0453823	0.578763
114110673	LOC114110673	NC_056077.1:758597-759365	44.5961	7.00218	2.6033	0.0453882	0.578763
101115029	JAKMIP2	NC_056058.1:56546050-56745386	0.288892	0.09193	1.68334	0.045453	0.578765
101104709	GPC1	NC_056054.1:1105989-1134068	16.1264	9.10956	0.977868	0.0455092	0.578765
105602333	LOC105602333	NC_056068.1:61688500-61893279	1.31396	0.683777	1.01408	0.0455481	0.578765
101110616	ACCS	NC_056068.1:73088349-73108857	8.4315	4.78108	0.986998	0.0455902	0.578765
101111313	LOC101111313	NC_056067.1:61354049-61365389	0	0.0276647	-6.88975	0.0456081	0.578765
101123220	MRPL58	NC_056064.1:55750988-55757953	52.7395	34.4242	0.79398	0.0456569	0.578765
101103018	MST1	NC_056072.1:50557500-50562441	9.1651	3.74629	1.52271	0.0456824	0.578765
101119699	HMGCL	NC_056055.1:242831761-242851036	50.0664	33.1433	0.742707	0.0456887	0.578765
101104636	CMC4	NC_056080.1:81512381-81524335	5.35238	2.58481	1.24973	0.0456954	0.578765
101105454	SIRT3	NC_056074.1:47447383-47471988	19.3645	11.6551	0.87966	0.0457002	0.578765
101123263	TLCD3B	NC_056077.1:26753430-26761167	0.120742	0.792534	-2.50542	0.0457107	0.578765
443425	TRHR	NC_056062.1:68229134-68274956	0.015494	0	8.39831	0.0457114	0.578765
443325	IGF2	NC_056074.1:45774740-45802762	1.29288	3.48441	-1.30701	0.0458661	0.580431
101111449	ZNF804B	NC_056057.1:74943514-75058112	0.00690067	0	8.21912	0.0459234	0.580599
101114012	HOXA13	NC_056057.1:70422486-70437307	3.06021	0.929598	1.70304	0.0459472	0.580599
101104798	EEF2KMT	NC_056077.1:4669865-4680862	6.10813	2.79751	1.37159	0.0460362	0.58131
101111341	ZDHHC2	NC_056079.1:19192940-19259296	182.048	115.294	0.857231	0.0460652	0.58131
105612995	LOC105612995	NC_056054.1:119743422-119758114	5.93976	3.10547	1.09057	0.0460747	0.58131
101105337	RGS22	NC_056062.1:77192402-77330055	0.835476	2.19183	-1.30431	0.0462434	0.582386
443542	ATP5MC2	NC_056056.1:132856508-132864487	211.584	140.915	0.770443	0.0462703	0.582386
101109260	CCDC91	NC_056056.1:186764103-187173914	23.6698	15.1433	0.830178	0.046281	0.582386
101105775	TIMM10	NC_056068.1:79601378-79604468	46.2326	24.8207	1.03011	0.046303	0.582386
101115630	PLAG1	NC_056062.1:36313599-36364939	0.0822083	0.356022	-1.85405	0.0463054	0.582386
100415906	NDUFB8	NC_056075.1:21175325-21180536	143.575	91.0431	0.855636	0.0463224	0.582386
101115317	PPP4R4	NC_056071.1:56644859-56748585	0.520708	0.0735503	2.96941	0.0463818	0.582839
101103393	PMM1	NC_056056.1:218478375-218488355	16.9862	8.8549	1.11349	0.0464202	0.58303
101104704	UPK1B	NC_056054.1:184855084-184886235	1.13276	7.17417	-2.70073	0.0466257	0.585025
101107297	CENPX	NC_056064.1:50387570-50391186	20.0458	10.9477	1.04565	0.046678	0.585389
101122661	RHOU	NC_056078.1:244163-253938	5.60793	19.3729	-1.6806	0.0468736	0.586899
101103245	SNX31	NC_056062.1:76635366-76720512	0.0945393	0.005778	3.9009	0.0469106	0.586899
101106946	FRK	NC_056061.1:21832320-21932960	1.31449	0.374064	1.8967	0.0470337	0.588086
101116490	HIGD1B	NC_056064.1:44300910-44303420	0.983394	0.0825183	3.55951	0.0471109	0.588681
101119578	RNF24	NC_056066.1:50889391-51005186	1.54463	3.082	-0.826954	0.0471398	0.588681
101110137	VAV2	NC_056056.1:2186976-2364531	3.65067	6.57119	-0.703306	0.0473325	0.588681
101108184	TSR3	NC_056077.1:1598002-1600402	31.5298	14.7514	1.22376	0.0473326	0.588681
101107693	LOC101107693	NC_056057.1:6591265-6721174	3.69729	2.11398	0.983736	0.047374	0.588681
101114318	HTATIP2	NC_056074.1:22107237-22121261	75.3062	46.5557	0.88636	0.0474304	0.588681
100216465	ATF4	NC_056056.1:216768342-216770443	184.773	114.229	0.86995	0.047469	0.588681
101115990	SETD7	NC_056070.1:18225104-18275593	95.6689	61.5714	0.802548	0.0475345	0.588681
100885759	ZFP91	NC_056068.1:80654819-80691799	29.2388	18.9476	0.800856	0.047561	0.588681
101103507	MRPL36	NC_056069.1:70919463-70920650	26.8034	11.2458	1.45733	0.0475666	0.588681
780470	CTSB	NC_056055.1:105585683-105606598	300.647	183.502	0.79789	0.0475938	0.588681
101107756	SEPTIN14	NC_056077.1:28090545-28106333	0.014839	0	6.79733	0.0475977	0.588681
101103518	ASB18	NC_056054.1:4922283-4999663	0.008969	0	8.35699	0.047635	0.588849
101119306	PCBD2	NC_056058.1:43993782-44037071	53.2898	24.7481	1.28842	0.0476582	0.588849
101110107	LOC101110107	NC_056054.1:199253234-199991339	15.4105	28.0223	-0.754732	0.047752	0.589475
101117325	LOC101117325	NC_056056.1:214772129-214890073	1.24009	2.9724	-1.15468	0.0477559	0.589475
101106861	MRPL27	NC_056064.1:36037074-36042126	49.9926	31.5883	0.845229	0.0478053	0.589794
101106042	TMEM14C	NC_056073.1:44610902-44617676	96.8938	64.1882	0.753213	0.0478703	0.590306
114108593	SKP1	NC_056058.1:43443294-43455167	91.0754	61.5548	0.733495	0.0479258	0.5907
101110082	ETFB	NC_056067.1:57503652-57517302	221.659	138.968	0.848195	0.0479794	0.590837
101118553	CEBPA	NC_056067.1:43221600-43222687	267.65	161.973	0.931421	0.0480271	0.591077
100303606	TUBB	NC_056073.1:27414200-27418672	73.2431	138.633	-0.83844	0.0482096	0.592496
101112637	PMEL	NC_056056.1:163559701-163568544	26.3444	4.10931	2.70834	0.0482132	0.592496
101108614	TENM4	NC_056074.1:14184955-15034208	3.4665	6.60265	-0.780896	0.0483887	0.593156
101116705	IL33	NC_056055.1:74208883-74351774	32.3892	20.1619	0.871571	0.048411	0.593156
100294595	SOCS3	NC_056064.1:53174639-53178040	2.52858	8.49837	-1.66447	0.0484155	0.593156
105605991	PLA2G2D	NC_056055.1:246269256-246314920	0	0.0853327	-6.89954	0.0484592	0.593156
101114702	NDUFS7	NC_056058.1:41483388-41489203	132.601	80.8767	0.92763	0.0484648	0.593156
101117865	ROMO1	NC_056066.1:64893433-64894917	157.14	98.4049	0.862142	0.0484903	0.593156
101106947	TCF21	NC_056061.1:59339995-59343007	0	0.0942357	-6.81482	0.04851	0.593156
101123531	SCN1A	NC_056055.1:143441362-143596860	2.51343	1.5801	0.76564	0.0485337	0.593156
101121761	LTA4H	NC_056056.1:165858005-165890879	32.5057	20.1217	0.904938	0.0485508	0.593156
101118089	MAN1C1	NC_056055.1:241036138-241184924	10.6471	20.1766	-0.838304	0.0485935	0.593389
101107696	MRPS33	NC_056057.1:105683072-105692450	45.0738	29.8318	0.764184	0.0487203	0.594194
101113936	GSTZ1	NC_056060.1:86680312-86697753	14.724	9.22006	0.863942	0.0487538	0.594194
443410	ATP5MC1	NC_056064.1:37362671-37365346	57.7689	32.4758	1.02408	0.0487542	0.594194
101102252	NAGLU	NC_056064.1:42351700-42358651	18.9193	11.037	0.886898	0.0488791	0.594844
101116104	OLFM3	NC_056054.1:79156193-79379204	0.00322267	0	8.32877	0.0488854	0.594844
101106758	TMTC2	NC_056056.1:118715013-119150686	2.23463	3.99247	-0.772718	0.0489178	0.594844
101114080	HUNK	NC_056054.1:124203951-124337501	0.120218	0.450421	-1.85205	0.04893	0.594844
101107662	ACTA1	NC_056078.1:961951-964706	0	0.111418	-6.84723	0.0489562	0.594844
101103998	MXRA8	NC_056065.1:50493552-50500233	90.1744	32.6348	1.48849	0.0489737	0.594844
101109544	SYTL3	NC_056061.1:82800188-82892773	4.03129	2.41666	0.956361	0.048974	0.594844
101110621	SPRING1	NC_056070.1:58281999-58310547	20.4704	10.9635	1.11062	0.0490256	0.594844
101104842	FMO2	NC_056065.1:38034067-38075508	1.94658	0.564189	1.92565	0.0490537	0.594844
101120062	PLA2G5	NC_056055.1:246305121-246390891	0.452404	0.0861643	3.23598	0.049092	0.594844
101119791	LOC101119791	NC_056079.1:33502208-33586019	0	0.008947	-8.25722	0.0491213	0.59491
101120283	PLAAT3	NC_056074.1:38412619-38446680	46.7302	93.3007	-0.87214	0.0491882	0.595147
100034666	TYRP1	NC_056055.1:81182553-81201184	0.014428	0	6.77624	0.0492455	0.595552
100568286	CYP2D6	NC_056056.1:218940622-219003889	8.54402	4.21985	1.36869	0.049272	0.595586
101122165	CCDC171	NC_056055.1:84029399-84381886	2.13022	3.61013	-0.758074	0.0494249	0.596749
101116643	GFPT1	NC_056056.1:38953793-39018793	35.9456	66.253	-0.724689	0.0494396	0.596749
101114097	GNGT1	NC_056057.1:11743037-12010958	5.07492	2.53409	0.919209	0.0495199	0.59743
101114660	ZBTB7C	NC_056076.1:48028402-48411196	0.224194	0.448516	-0.903025	0.0496169	0.597914
101120897	ASAP3	NC_056055.1:243105445-243155418	11.1069	6.73917	0.892787	0.0496273	0.597914
101108621	TVP23A	NC_056077.1:9981220-10012708	0.425109	0.129924	1.91596	0.049665	0.59799
101122597	LOC101122597	NC_056058.1:14205510-14207281	75.0362	45.3806	0.911756	0.0497204	0.59799
101102850	ACKR3	NC_056054.1:4622543-4635069	11.0733	21.8865	-0.849938	0.0497539	0.59799
101118292	MAP1LC3A	NC_056066.1:63918154-63921191	18.5672	9.87488	1.08559	0.049757	0.59799
101118788	SLC30A9	NC_056059.1:61563489-61644058	20.7534	14.1171	0.717256	0.0499277	0.59967
100170399	RTN4	NC_056056.1:68965224-69039771	204.351	131.795	0.745626	0.0499446	0.59967
101111234	IRF4	NC_056073.1:51019405-51037038	0.462101	1.56486	-1.66642	0.0499827	0.599712
101115646	LOC101115646	NC_056067.1:1324021-1336675	8.81962	1.96011	2.2457	0.0499959	0.599712
443461	SLC2A1	NC_056054.1:17373828-17401820	14.4941	7.57831	1.18853	0.050218	0.601282
101107124	CCNE1	NC_056067.1:39912296-39923937	1.10167	0.338084	1.82397	0.0502227	0.601282
101114310	LOC101114310	NC_056071.1:23750523-23775217	23.5851	15.7756	0.748588	0.0502623	0.601468
101102914	MLX	NC_056064.1:42378222-42385504	36.6942	22.709	0.883799	0.050375	0.60253
101106285	CCDC60	NC_056070.1:55884938-56048742	0.00443267	0	8.09872	0.0504511	0.603061
101109602	OLFM1	NC_056056.1:1380978-1420708	4.30541	1.87285	1.40289	0.0504674	0.603061
121817883	LOC121817883	NC_056077.1:343522-355241	0.020205	0	6.80101	0.0509495	0.607085
101111093	PGLS	NC_056058.1:5363386-5371301	25.8979	16.7386	0.794165	0.0511045	0.608355
101104306	LOC101104306	NC_056065.1:1201142-1311552	16.9505	31.7792	-0.801475	0.0512243	0.60901
101122490	THAP4	NC_056054.1:288160-323379	18.038	10.7456	0.926906	0.0512548	0.60901
101116059	SNAP91	NC_056061.1:10751422-10925749	0.00318567	0.083295	-4.6645	0.0512553	0.60901
101111581	TARS3	NC_056071.1:26585782-26630654	2.06921	1.01809	1.09867	0.0512606	0.60901
101121980	FANCE	NC_056073.1:9544110-9554970	7.76214	4.50066	0.958939	0.0513992	0.609978
101106954	SDK2	NC_056064.1:56940148-57213491	0.064879	0.189039	-1.52348	0.0514178	0.609978
101105403	PTPA	NC_056056.1:7315020-7348790	28.015	18.2982	0.763821	0.0514354	0.609978
101104383	OTUD3	NC_056055.1:246494831-246530021	12.3858	8.07636	0.793498	0.0515505	0.611054
101106257	GET3	NC_056058.1:11072244-11080335	39.8847	26.3264	0.777911	0.0515772	0.611081
101123183	DLC1	NC_056079.1:22567567-23087569	32.2807	58.2369	-0.722675	0.0516369	0.6115
101111239	LAMTOR5	NC_056054.1:87703265-87708308	64.5298	43.208	0.745373	0.051745	0.612491
101111138	LPAR3	NC_056054.1:61857276-61941446	2.08426	0.85398	1.56661	0.0518362	0.613165
101105386	SPCS3	NC_056079.1:6981379-6990322	62.4894	41.3797	0.775965	0.0518509	0.613165
101116260	AEN	NC_056071.1:18978688-18990280	7.09416	3.35598	1.3018	0.0519206	0.613477
101123553	P4HA2	NC_056058.1:19939353-20009502	7.36471	16.6749	-1.12763	0.0519384	0.613477
101116867	LOC101116867	NC_056071.1:56463326-56478671	0.594138	0.093235	2.68466	0.0519506	0.613477
101110576	SLC2A4RG	NC_056066.1:53731162-53734741	30.4256	17.125	1.02759	0.0521576	0.615631
101120753	SLC8A3	NC_056060.1:79866487-80028292	0.0897037	0.292541	-1.54575	0.0522677	0.615966
101116072	NMNAT1	NC_056065.1:42833157-42889417	26.4048	16.3621	0.861052	0.0523272	0.616183
101112915	RPS6KC1	NC_056065.1:69807144-70020186	7.45647	13.4054	-0.738291	0.052378	0.616203
105612644	LOC105612644	NC_056054.1:109725429-109727075	0.273654	0.015011	3.92052	0.0524354	0.6163
101104397	GPX3	NC_056058.1:60066363-60074517	414.402	800.981	-0.875139	0.0525224	0.616745
101122659	MUC4	NC_056054.1:191332100-191379981	0	0.00567033	-6.8031	0.0526299	0.617601
101120101	NSFL1C	NC_056066.1:59368342-59389139	45.3913	30.8417	0.734191	0.0526933	0.617601
101118643	TRIAP1	NC_056070.1:62879369-62884452	37.5843	22.0406	1.04206	0.0527151	0.617601
101106539	ABHD12	NC_056066.1:42366148-42419232	16.194	10.9535	0.725386	0.0527243	0.617601
114109097	LOC114109097	NC_056071.1:19590784-19595342	0	0.0560077	-6.6274	0.0527431	0.617601
101103205	MAB21L4	NC_056054.1:813319-826245	0	0.0183443	-6.64447	0.0529006	0.618722
101107611	NBEA	NC_056063.1:26062224-26728332	4.82981	8.58872	-0.741596	0.0529096	0.618722
443491	SLC6A4	NC_056064.1:21221663-21253972	0.792813	2.41178	-1.40499	0.0529283	0.618722
105608415	GNGT2	NC_056064.1:37090913-37132151	3.52601	6.90092	-0.906631	0.0529374	0.618722
100034672	PTX3	NC_056054.1:230867074-230873103	1.2657	6.05024	-2.1458	0.0530566	0.619258
101121562	ERI2	NC_056077.1:18985526-19058343	3.58187	1.83625	1.24098	0.0530819	0.619258
101106734	LOC101106734	NC_056054.1:264321663-264406608	4.44098	2.87725	0.80838	0.0530821	0.619258
106990160	LOC106990160	NC_056067.1:63585382-63597345	0.0181203	0	6.53904	0.053164	0.619675
101105139	LOC101105139	NC_056055.1:18527019-18532458	0.0394447	0	6.63064	0.0532415	0.619675
100302084	RAB5A	NC_056054.1:278208719-278242018	18.2779	11.8451	0.833636	0.0532674	0.619675
101120644	PITHD1	NC_056055.1:242864390-242872131	33.5631	21.7502	0.808705	0.0532699	0.619675
101122456	TAF4	NC_056066.1:54791453-54864796	2.4596	4.72106	-0.813778	0.0532702	0.619675
101114199	HEBP2	NC_056061.1:63478768-63485193	80.9621	53.3399	0.776213	0.0532908	0.619675
101120135	HACD2	NC_056054.1:188724639-188816813	124.87	77.5675	0.898218	0.0533676	0.62028
101115941	FBXO16	NC_056055.1:102888395-102940548	0	0.0148027	-8.13777	0.0534037	0.620413
101109388	LOC101109388	NC_056068.1:45784113-45901396	3.15469	5.88874	-0.875971	0.0534623	0.620806
101113527	MS4A13	NC_056068.1:81893455-81921488	0.290501	0.0177673	4.23545	0.0535159	0.62086
101114411	CASKIN1	NC_056077.1:2230082-2248228	0.615599	0.187875	1.87632	0.0535165	0.62086
101110290	MRAS	NC_056054.1:251356048-251423365	23.4993	15.2915	0.820262	0.0536474	0.622091
101109031	IGFN1	NC_056065.1:79118464-79147937	0	0.00859933	-6.61448	0.0537932	0.622291
121817697	LOC121817697	NC_056054.1:591125-598955	0	0.031541	-6.65229	0.0537983	0.622291
101116921	COPRS	NC_056064.1:18002184-18006677	14.7408	8.15281	0.981719	0.0538995	0.622291
101114767	EGFL7	NC_056056.1:2839960-2864674	26.846	19.5912	0.849228	0.0539025	0.622291
101114864	SMARCD3	NC_056057.1:115431506-115464684	27.0012	17.6958	0.776773	0.0539054	0.622291
101114572	BCL9	NC_056054.1:98594859-98690567	0.97456	2.05199	-0.970058	0.0539156	0.622291
114112813	MINDY4B	NC_056054.1:237957122-237998168	0.0292837	0	7.96736	0.053918	0.622291
101123311	TBC1D4	NC_056063.1:50922693-51136940	6.6839	12.2132	-0.729344	0.0539252	0.622291
101120001	LOC101120001	NC_056065.1:5010170-5017352	0.917407	4.8766	-2.39612	0.0539375	0.622291
101103565	SAR1B	NC_056058.1:43760511-43789384	29.44	19.1151	0.819744	0.0539817	0.622515
101121427	PLEKHH1	NC_056060.1:77474314-77532347	0.0390887	0.21912	-2.31434	0.0540574	0.622535
101105552	HNRNPA3	NC_056055.1:132874286-132899302	37.343	65.7391	-0.686664	0.0540947	0.622535
101103534	TET1	NC_056078.1:24122199-24274120	7.34923	13.3433	-0.754908	0.0541076	0.622535
101109819	TMCC2	NC_056065.1:2866077-2904128	0.568444	1.76042	-1.6814	0.0541721	0.62281
101102089	ADCY2	NC_056069.1:65471619-65927574	1.03205	0.588677	0.892168	0.0541811	0.62281
101123284	LOC101123284	NC_056056.1:149937563-150004070	2.43718	1.30073	1.17342	0.0543488	0.623309
101102026	PARL	NC_056054.1:204033275-204086762	62.5855	42.5178	0.732907	0.0544345	0.623523
101123554	NOTCH3	NC_056058.1:7738979-7777400	6.35377	11.6882	-0.781075	0.054442	0.623523
101120939	CMC2	NC_056067.1:7172829-7187291	14.4704	9.42921	0.844812	0.0544966	0.623738
101116510	NDUFC1	NC_056070.1:18448404-18452153	44.9117	27.5907	0.894098	0.0545106	0.623738
101118358	FAM13A	NC_056059.1:36354312-36697318	8.49503	17.272	-0.863458	0.0546512	0.623777
101105970	CACNG3	NC_056077.1:22465375-22562351	0	0.007037	-8.12398	0.0546565	0.623777
101111148	ANTKMT	NC_056077.1:1150983-1155606	27.6665	15.5801	1.00959	0.0546681	0.623777
101108710	RBP2	NC_056054.1:250222554-250255181	0.0188893	0	8.19447	0.0547016	0.623777
101103632	PLA2G2C	NC_056055.1:246191245-246217833	0.767909	3.15607	-1.84409	0.0547799	0.623777
101107802	INCA1	NC_056064.1:26268153-26296253	10.0564	6.04965	0.916985	0.0548453	0.623777
101120694	CCNB1	NC_056069.1:10618577-10628248	2.77703	1.13916	1.44122	0.0548681	0.623777
101117285	LOC101117285	NC_056054.1:27413888-27510104	61.4242	39.7683	0.82096	0.0549175	0.623777
114113976	LOC114113976	NC_056056.1:133914960-133920189	0.0456947	0	6.81264	0.0549327	0.623777
101105647	TOMM22	NC_056056.1:216135127-216136892	49.4889	29.1547	0.942334	0.0549756	0.623777
101106565	ADAMTS4	NC_056054.1:112632053-112640143	1.79796	6.58063	-1.89947	0.0550024	0.623777
101110076	PRG4	NC_056065.1:66828408-66844700	1.54094	7.39267	-2.06381	0.0550723	0.623777
101121464	ADGRF1	NC_056073.1:20164186-20211752	0.0121013	0	7.91312	0.0551052	0.623777
101107595	TEX43	NC_056058.1:24995493-25000811	0	0.044783	-6.59529	0.0551242	0.623777
101115424	GET4	NC_056077.1:42173502-42187729	22.8276	14.7531	0.813292	0.0551357	0.623777
114116078	LOC114116078	NC_056061.1:74479192-74775207	1.12292	5.20006	-2.15074	0.0551659	0.623837
101118143	NTM	NC_056074.1:31966046-32920053	0.23833	0.128854	0.943544	0.0552834	0.624446
101112757	CLPTM1	NC_056067.1:52452569-52480377	33.974	22.3888	0.791656	0.0554024	0.625384
101123418	TPMT	NC_056073.1:38695014-38717709	7.01097	4.11285	0.969412	0.05559	0.626528
101109354	ARSK	NC_056058.1:92507183-92562256	9.66126	6.40883	0.734504	0.0556145	0.626528
443485	BCAT1	NC_056056.1:190675754-190797952	0.0795233	0.280551	-1.46404	0.0556708	0.626528
101121876	NQO1	NC_056067.1:36338391-36351571	14.3149	8.56227	0.90075	0.055677	0.626528
101110188	PSMB2	NC_056054.1:10576686-10611147	60.2316	40.3489	0.765067	0.0556786	0.626528
101105285	LSM3	NC_056072.1:57955355-57963985	38.5654	25.0365	0.80731	0.0558203	0.62784
101114526	LARP6	NC_056060.1:17687844-17710935	10.2272	20.6061	-0.942504	0.0559115	0.628584
101110450	LOC101110450	NC_056069.1:10258750-10301266	0.836853	1.99506	-1.05619	0.0560424	0.629771
XLOC_102321	XLOC_102321	NC_056070.1:27092915-27104658	0.102914	0.52253	-2.26438	0.0560673	0.629771
101111244	CNDP2	NC_056076.1:4187213-4200857	28.7488	19.2361	0.76531	0.0562157	0.63001
101109367	TP53INP1	NC_056062.1:82324369-82340386	46.5661	27.5021	0.778129	0.0565476	0.632986
101108766	PIK3C2B	NC_056065.1:2017054-2085919	2.21515	4.16859	-0.826068	0.0565554	0.632986
100174987	KCNQ5	NC_056062.1:498683-1130834	0.0996193	0.204857	-0.96739	0.0566452	0.633427
101112917	NAV1	NC_056065.1:80016302-80161864	2.33583	4.7262	-0.773158	0.0568972	0.635582
101120963	TAF11	NC_056073.1:9012235-9021500	19.98	12.7351	0.833136	0.056914	0.635582
101104033	PCOLCE	NC_056077.1:36386447-36391448	91.9959	189.735	-0.988121	0.0569836	0.636076
101102470	DPH7	NC_056056.1:412552-431700	16.5277	9.69581	0.936566	0.05707	0.636757
101111720	LOC101111720	NC_056063.1:75600682-75608011	0	0.0343827	-6.59373	0.0571004	0.636813
101114934	KLF8	NC_056080.1:49268776-49573501	0.462268	0.87201	-0.837383	0.057204	0.637685
101115273	IRAK3	NC_056056.1:153729763-153786165	4.55759	8.19445	-0.749706	0.057315	0.638355
101119674	TTC28	NC_056070.1:67580374-68149139	3.87304	6.74773	-0.686004	0.0574134	0.638804
101123343	TRAP1	NC_056077.1:3563672-3613563	12.8368	8.32346	0.830387	0.0574441	0.638804
780513	CRYBB3	NC_056070.1:65481682-65488167	0.0178177	1.06001	-5.87251	0.057558	0.638804
101123437	AZGP1	NC_056077.1:36889132-36893575	13.9363	31.0553	-1.07927	0.0576085	0.639069
101102591	ETFA	NC_056071.1:29276897-29352977	48.1575	32.8733	0.728973	0.0576638	0.639297
114118072	LOC114118072	NC_056067.1:63850368-63909334	0.203299	0.836847	-1.85776	0.0577067	0.639311
101110089	RAB3C	NC_056069.1:20634185-20932905	0.0753427	0.226359	-1.52069	0.0577796	0.639549
101111017	PPIC	NC_056058.1:28473276-28487177	11.1182	27.5282	-1.14862	0.0578045	0.639549
101102912	GGT6	NC_056064.1:24916913-24919814	0.0465143	0	5.85431	0.0578434	0.639674
101113118	HAGH	NC_056077.1:1903546-1928389	57.6738	36.8839	0.845562	0.0578717	0.639674
101112370	NDUFB10	NC_056077.1:2040243-2042565	140.293	93.1266	0.766984	0.0579127	0.639674
101121801	NNT	NC_056069.1:31256235-31351275	22.9091	15.7005	0.722059	0.057918	0.639674
101121321	ELF4	NC_056080.1:113943833-113981178	2.24873	4.38168	-0.87702	0.0579677	0.639941
101117011	TDRD12	NC_056067.1:42692533-42767131	1.86579	4.34099	-1.13554	0.0581501	0.641112
XLOC_011152	XLOC_011152	NC_056054.1:141199849-141862501	3.47307	6.91895	-0.913674	0.0581537	0.641112
101105179	LOC101105179	NC_056067.1:11307276-11314198	406.809	274.626	0.750971	0.0581962	0.641112
101115263	ARID1A	NC_056055.1:240134744-240204307	7.1139	12.8093	-0.77656	0.0582383	0.641112
101115827	DROSHA	NC_056069.1:42132660-42252197	1.83553	3.33129	-0.718874	0.0582613	0.641112
101105609	LOC101105609	NC_056073.1:27012549-27016715	3.15312	0.861927	1.96564	0.0582673	0.641112
101105280	FHIP1A	NC_056070.1:6273992-6580163	1.2452	0.832156	0.724225	0.0582783	0.641112
101113505	NAPRT	NC_056062.1:14086869-14090047	27.3702	15.2298	1.01465	0.0583429	0.641541
101120002	MAP1LC3C	NC_056065.1:34211038-34216768	3.16031	0.671047	2.23865	0.0584369	0.642289
101108203	ADCY3	NC_056056.1:32312809-32401058	1.77591	3.30562	-0.815879	0.0585444	0.642647
101123596	IGSF5	NC_056054.1:260561935-260612384	0.0127727	0	6.38513	0.0585459	0.642647
101120029	LOC101120029	NC_056074.1:38358016-38383683	6.36341	13.4787	-0.920016	0.0586014	0.642772
101117529	EMC10	NC_056067.1:56350136-56356328	107.769	72.5143	0.736834	0.0586085	0.642772
101112323	SPRED1	NC_056060.1:32050011-32174378	5.946	10.6368	-0.743808	0.058808	0.644384
443367	ABCB1	NC_056057.1:33893569-33995231	2.4572	1.29582	0.938604	0.0590031	0.645969
121819698	LOC121819698	NC_056058.1:66144564-66176555	0.0184897	0	7.80583	0.0590589	0.646299
443189	CHRM3	NC_056078.1:11500228-12063731	0.017183	0.0547607	-1.51275	0.0590991	0.646456
101112836	DISP3	NC_056065.1:41407848-41465189	0	0.003923	-6.52774	0.0591534	0.646548
114109534	SSR1	NC_056073.1:47168723-47185722	102.018	64.5727	0.850832	0.0591591	0.646548
101109175	REX1BD	NC_056058.1:4420238-4422865	95.2615	58.3378	0.878699	0.059197	0.646681
101111512	XYLT1	NC_056077.1:16028619-16378285	2.18094	3.88984	-0.72969	0.0592547	0.647029
101102112	BCHE	NC_056054.1:222169995-222245710	18.0552	10.5368	0.87407	0.0593518	0.647611
101123641	KLF5	NC_056063.1:48406113-48425297	0.670861	1.89352	-1.36152	0.0593596	0.647611
101121794	SYNGR4	NC_056067.1:54819767-54830195	0.0542477	0	8.06358	0.0594121	0.647854
101106989	GRIN2A	NC_056077.1:9017357-9457516	0.0248973	0.001029	4.84611	0.0594336	0.647854
101108880	PBX1	NC_056054.1:116489391-116843728	7.27145	14.2351	-0.902412	0.0594979	0.648274
101102692	LAMA1	NC_056076.1:40436066-40560280	0.0652683	0.012738	2.58841	0.059581	0.648637
101108222	KXD1	NC_056058.1:4428055-4435519	55.2002	35.8355	0.792197	0.0596645	0.648961
101111161	HIBCH	NC_056055.1:118988395-119098034	26.7699	17.6382	0.778527	0.0598179	0.649901
101122928	EPHB2	NC_056055.1:243636304-243852118	0.40005	1.01987	-1.29251	0.0600755	0.651504
101122108	LOC101122108	NC_056058.1:49501070-49537420	0	0.0182837	-7.92035	0.0600801	0.651504
101123513	SFXN3	NC_056075.1:21628587-21635599	3.11885	7.54611	-1.20218	0.0602974	0.652989
101114409	MYH11	NC_056077.1:14622730-14749438	6.65125	12.4092	-0.835245	0.060302	0.652989
XLOC_128923	XLOC_128923	NC_056079.1:40860578-40938218	1.08103	2.12274	-0.87162	0.0604374	0.653401
101121342	CALD1	NC_056057.1:100103658-100336100	194.354	131.886	0.680308	0.0604673	0.653443
101118347	FBLN7	NC_056056.1:106222209-106279873	5.87754	2.85373	1.08251	0.0605081	0.653602
101117620	MYO18B	NC_056070.1:65700568-65942641	0.0786163	0.013504	2.7048	0.0606021	0.653773
101108797	LOC101108797	NC_056077.1:762122-762890	34.3001	4.86656	2.73798	0.0606925	0.654467
101107809	LOC101107809	NC_056066.1:42865085-43081103	0.646373	0.062862	3.6532	0.0607533	0.65484
105606202	SOX12	NC_056066.1:60355254-60360150	0.704374	2.61735	-1.81723	0.0609303	0.655817
101122610	ANKFN1	NC_056064.1:6939069-6986842	0.0103513	0	7.75524	0.0609596	0.655817
101119512	LARS2	NC_056072.1:53718404-53864426	8.42336	6.21365	0.696017	0.0609623	0.655817
121818487	LOC121818487	NW_024599823.1:85520-90404	0	0.0477267	-6.57929	0.0610216	0.655817
780452	YWHAZ	NC_056062.1:76344800-76378668	32.4831	20.5195	0.83167	0.0610348	0.655817
101117580	BCL2L13	NC_056056.1:214917326-214965338	59.8377	36.7417	0.79904	0.061053	0.655817
443135	PTHLH	NC_056056.1:187447672-187459852	0.195899	1.26081	-2.60501	0.0611089	0.655888
101116673	FA2H	NC_056067.1:1635997-1690733	0	0.0105963	-7.89774	0.061112	0.655888
101121311	GPR149	NC_056054.1:233993415-234082399	0	0.00648833	-7.89774	0.0611386	0.655893
101113498	SQOR	NC_056060.1:62952320-63006250	68.6693	44.2229	0.818348	0.061266	0.656325
101116493	SRGAP2	NC_056065.1:3815572-4072173	4.93585	8.89191	-0.781597	0.0612794	0.656325
101106721	MOCS1	NC_056073.1:13844636-13878563	13.2395	8.23003	0.924744	0.0612889	0.656325
101105054	VBP1	NC_056080.1:81702996-81725117	43.3903	29.8935	0.716222	0.061315	0.656325
101114112	TMEM229B	NC_056060.1:77414178-77455077	1.54937	0.371703	2.07803	0.0613359	0.656325
101105902	SLC4A5	NC_056056.1:96063701-96186894	2.29465	1.29599	0.948693	0.0613883	0.656606
678680	LGMN	NC_056071.1:55197096-55234357	48.0746	31.4664	0.756842	0.0615236	0.657772
121817109	LOC121817109	NC_056071.1:45507933-45607769	0	0.00650267	-7.87833	0.0615621	0.657904
101104627	PBXIP1	NC_056054.1:105170225-105186746	44.1202	30.0374	0.732809	0.0616284	0.65795
101112830	UBL3	NC_056063.1:31096484-31143257	34.1928	23.8192	0.681317	0.0616876	0.65795
101104467	TNNT3	NC_056074.1:45956956-45972877	1.34141	4.3872	-1.65151	0.0617025	0.65795
101115161	ITPK1	NC_056071.1:55418411-55573428	8.09133	5.15988	0.800321	0.0617062	0.65795
101108844	MYH10	NC_056064.1:27880616-28002378	31.0051	57.1157	-0.764712	0.0617721	0.65795
101113603	LOC101113603	NC_056063.1:31747812-31758539	118.58	80.2982	0.7262	0.0618257	0.657991
101120346	HOXB8	NC_056064.1:37599828-37613384	0.0551643	0.56667	-2.34382	0.0618325	0.657991
105603615	TIMP4	NC_056072.1:56879035-56890058	13.0675	7.74039	0.942807	0.0619533	0.658996
101113363	ADGRD1	NC_056070.1:46091359-46267816	4.20081	7.3128	-0.669263	0.0620905	0.659656
101115164	CCDC12	NC_056072.1:52547532-52588703	21.2954	14.6006	0.713197	0.0620942	0.659656
105606468	TPO	NC_056055.1:765784-800147	0.539397	0.187754	1.7073	0.0621301	0.659758
101114790	LOC101114790	NC_056064.1:14172015-14176941	8.16296	19.0906	-1.15762	0.0622069	0.659885
101107684	LRRIQ1	NC_056056.1:121244884-121475204	0	0.00280233	-7.84962	0.0622216	0.659885
114117287	LOC114117287	NC_056065.1:13444149-13444978	0.496935	0.0207877	4.34909	0.0622664	0.659885
101105695	TREM1	NC_056073.1:15173240-15187615	0.484968	2.10281	-2.09543	0.0622853	0.659885
101113773	SNF8	NC_056064.1:37330460-37338382	30.7251	20.2543	0.751847	0.0623	0.659885
114108673	GLOD4	NC_056064.1:21976618-22000698	4.0735	2.47802	0.892588	0.0623571	0.659945
101123512	PPP1R3C	NC_056075.1:13011220-13016061	25.3998	14.9551	0.929415	0.0623653	0.659945
101121226	TM4SF4	NC_056054.1:239384395-239413042	0.0192957	0	7.71773	0.0624109	0.659945
100187549	HPCAL1	NC_056056.1:19470051-19587764	4.38574	1.98109	1.28323	0.0625733	0.661105
101109968	ALKBH7	NC_056058.1:15935548-15937174	32.4279	17.5385	1.13995	0.062627	0.661202
114115593	LOC114115593	NC_056060.1:36265065-36390312	2.72968	1.49986	0.923218	0.0627217	0.661461
114116641	RAP2A	NC_056063.1:73976947-74018612	7.70638	13.4919	-0.696464	0.0627388	0.661461
101116015	NTRK2	NC_056055.1:34664129-35064644	35.9584	70.9362	-0.914404	0.0628366	0.662213
101123429	TACC2	NC_056075.1:41404372-41634796	2.77027	5.07262	-0.724399	0.0628675	0.662261
101119297	SHANK3	NC_056056.1:225883883-225935017	4.02479	7.53467	-0.800803	0.0629451	0.6628
101116150	PLA2G4D	NC_056060.1:35698200-35724922	0.00777333	0	6.40785	0.0630036	0.66292
101103926	KIF7	NC_056071.1:20379766-20399877	4.79338	8.8057	-0.812815	0.0631083	0.66292
105613048	PFN2	NC_056054.1:238934509-238940889	44.827	25.6268	0.94627	0.0631184	0.66292
121819791	LOC121819791	NC_056059.1:113740114-113742420	0.237397	0	7.69945	0.0631595	0.66292
101120347	ANGPTL1	NC_056065.1:59635947-59661928	10.1681	19.0948	-0.814858	0.0631904	0.66292
101107096	ADGRE1	NC_056058.1:15273129-15374003	0.645277	2.79361	-1.86083	0.0632239	0.66292
101111570	TOMM40	NC_056067.1:52408394-52419901	19.8534	12.8905	0.818279	0.0632529	0.66292
101108489	CXCL9	NC_056059.1:91613873-91618826	4.9142	14.2796	-1.36652	0.0633208	0.66292
114115898	LOC114115898	NC_056060.1:95234605-95334723	3.85994	7.01907	-0.814325	0.0633261	0.66292
101119154	AMFR	NC_056067.1:23707152-23751745	99.4897	67.0271	0.762493	0.0633929	0.66292
101122177	EPHA8	NC_056055.1:243957793-243989786	0	0.0190207	-7.90562	0.0633943	0.66292
101104749	PPA2	NC_056059.1:20092223-20188967	26.0573	17.3209	0.816028	0.0634086	0.66292
101108119	LPCAT3	NC_056056.1:209295843-209329419	5.2582	9.63166	-0.753056	0.0634587	0.66292
101112793	MAGIX	NC_056080.1:55977378-55981271	7.51831	2.59296	1.64973	0.0636403	0.664264
101116782	WNT2B	NC_056054.1:89923118-89938117	0.36294	1.26198	-1.61933	0.0637332	0.66468
101117700	PLA2G1B	NC_056070.1:62784511-62794783	0.057359	0	7.68093	0.0637675	0.664762
101119886	ATP6AP1	NC_056080.1:80004707-80012804	33.3555	21.6303	0.823787	0.0639359	0.666214
101107670	PQBP1	NC_056080.1:56173107-56178539	16.44	9.76137	0.930996	0.0639599	0.666214
114113168	LOC114113168	NC_056055.1:139554172-139752937	1.32719	0.90867	0.843254	0.0640111	0.66647
101107020	TMEM232	NC_056058.1:106940818-107215514	0.162189	0.510901	-1.35975	0.0641852	0.667451
101107656	EMP2	NC_056077.1:9794185-9837660	30.7822	54.8333	-0.682098	0.0642333	0.667651
101103497	PDRG1	NC_056066.1:61132523-61139877	32.3096	21.2118	0.779443	0.0642645	0.667651
105615210	SYCE2	NC_056058.1:10945481-10968271	2.33436	0.964002	1.51261	0.0643374	0.667651
101117623	SUCLG2	NC_056072.1:33944678-34240923	37.2647	26.2994	0.659041	0.0644524	0.668273
101109212	LOC101109212	NC_056072.1:43017764-43018702	116.205	62.5885	1.02367	0.0644867	0.668273
101109507	YEATS2	NC_056054.1:204099629-204215268	4.16935	7.34962	-0.669072	0.0645416	0.668273
101119863	KCNE2	NC_056054.1:121756268-121767081	0	0.0185833	-6.34619	0.0645639	0.668273
101102652	ANKFY1	NC_056064.1:24599367-24669416	5.12962	6.86502	-0.711775	0.064584	0.668273
101107259	LOC101107259	NC_056055.1:235928657-235942845	0.0129387	0	6.50197	0.0646804	0.668719
101119707	AUP1	NC_056056.1:96380783-96383742	62.3045	40.6767	0.792433	0.0647341	0.668817
101116543	MXRA5	NC_056080.1:5786355-5815494	6.11853	16.8295	-1.4404	0.0647805	0.668887
101105019	JPH3	NC_056067.1:12685621-12762859	0.00638433	0	7.88125	0.0648203	0.668887
101111724	MPP2	NC_056064.1:43506953-43552713	0.740023	0.193774	1.9045	0.0648299	0.668887
101101872	CTNNAL1	NC_056055.1:14279085-14336317	6.59204	4.25151	0.793838	0.0648732	0.669058
101106785	RFNG	NC_056064.1:50324068-50328155	41.7052	26.9071	0.807299	0.0650052	0.670144
101117295	SH3D21	NC_056054.1:11177578-11191989	1.42895	3.67679	-1.49734	0.0652199	0.671806
101102025	ATP6V1A	NC_056054.1:179372685-179436004	36.2499	25.2545	0.687178	0.0652725	0.671818
443369	PADI3	NC_056055.1:248977937-249008036	1.19457	0.444832	1.62216	0.065302	0.671818
101103791	TRIM14	NC_056055.1:49636831-49664428	0.825098	2.32482	-1.31466	0.0653968	0.671818
101102362	CLDN19	NC_056054.1:17217817-17222683	0	0.0464507	-6.55312	0.0654354	0.671818
101112785	ACSM5	NC_056077.1:18547560-18579579	3.74204	2.03071	1.04896	0.0655227	0.672167
101110626	PFKFB4	NC_056072.1:51356383-51395653	4.99901	2.90534	0.950955	0.0655458	0.672167
101106320	NUDT4	NC_056056.1:129706830-129723499	25.5063	46.7483	-0.775545	0.0655498	0.672167
101120069	SMC1B	NC_056056.1:221596703-221717644	0	0.193265	-6.60395	0.0656265	0.672678
100145856	HEXA	NC_056060.1:19104180-19135657	34.6919	22.3306	0.731408	0.0659699	0.674153
101112771	STMND1	NC_056073.1:39385204-39407626	0.023212	0	7.6239	0.0660123	0.674153
443264	LEPR	NC_056054.1:41094622-41249768	30.4861	14.842	1.04758	0.0661917	0.675543
101108865	FGD5	NC_056072.1:57322672-57448571	6.26948	10.7893	-0.678113	0.0662348	0.675543
101106115	THUMPD3	NC_056072.1:17192714-17216581	14.5396	9.78503	0.756679	0.0662529	0.675543
101115823	BBOX1	NC_056068.1:56517646-56588855	0	0.00775267	-7.7608	0.0662715	0.675543
101120741	KMT2D	NC_056056.1:137169771-137209860	3.26875	6.02226	-0.770656	0.066283	0.675543
114111549	LOC114111549	NC_056080.1:64019069-64019868	1.49655	0.173672	3.295	0.0664902	0.677067
101110174	TAF10	NC_056068.1:46196957-46198364	60.1417	35.2075	0.962142	0.066509	0.677067
101118280	SEC63	NC_056061.1:29460223-29522101	50.3164	34.7693	0.710403	0.0665135	0.677067
101113319	KRT80	NC_056056.1:134195571-134218816	0	0.024948	-7.81849	0.0666244	0.677646
101108737	DNM1	NC_056056.1:8029526-8075667	2.54464	5.51729	-0.987232	0.0667811	0.678757
101118036	FSCN2	NC_056064.1:50732600-50738353	0	0.035628	-6.39784	0.0667878	0.678757
101111145	PSTPIP2	NC_056076.1:46121226-46217332	20.2693	12.5807	0.888205	0.0670372	0.679852
101121640	LRRC8C	NC_056054.1:67004423-67091646	3.35779	6.81168	-0.965548	0.067038	0.679852
101112235	TMTC4	NC_056063.1:76580498-76639473	5.24872	3.5078	0.753882	0.0670778	0.679852
101119337	PSMD6	NC_056072.1:37550212-37569039	42.3511	29.0521	0.725193	0.0671168	0.679852
121816111	LOC121816111	NC_056065.1:5308992-5337613	0.032331	0.255851	-2.76535	0.0671275	0.679852
101102647	LOC101102647	NC_056060.1:28200820-28255931	2.24511	0.929837	1.2959	0.0671395	0.679852
101120907	NDUFAF7	NC_056056.1:86833707-86853800	9.63054	6.31621	0.901437	0.0672251	0.680444
101108866	MRPS10	NC_056073.1:15957902-15967239	46.01	31.8149	0.705564	0.0672807	0.680732
101117815	SH2B2	NC_056077.1:35106693-35131068	1.52066	3.26214	-1.26072	0.0673154	0.680808
105608253	LETM1	NC_056059.1:117421548-117448383	15.0877	9.92168	0.798357	0.0673928	0.681316
101120404	ATL2	NC_056056.1:85768883-85838632	24.1432	15.4328	0.829637	0.0675224	0.682076
101115781	NDUFA9	NC_056056.1:211306508-211328210	42.0498	28.6667	0.734714	0.0675561	0.682133
101111830	DCDC1	NC_056068.1:60490317-60966529	0.080382	0.177497	-0.999013	0.0676049	0.682133
101109147	LOC101109147	NC_056055.1:28716735-28953166	1.44649	0.948737	0.771033	0.0676319	0.682133
101106036	TMEM233	NC_056070.1:55791596-55838475	0	0.0110323	-7.72444	0.0676368	0.682133
114118686	FOXD1	NC_056069.1:8315639-8318548	0.04737	0.368098	-2.77264	0.0678745	0.683752
101104119	MYPN	NC_056078.1:23818659-23914719	0.00318633	0	6.25772	0.0679047	0.683752
105604154	POLR2L	NC_056074.1:46916318-46918087	116.622	71.995	0.88034	0.0679258	0.683752
101110523	CFAP52	NC_056064.1:28680841-28707303	0.0190057	0	7.80135	0.0679503	0.683752
101116066	NAXD	NC_056063.1:84590707-84603479	16.5902	10.0251	0.81421	0.0679877	0.683752
101120392	LOC101120392	NC_056073.1:25292225-25305385	4.05148	14.6334	-1.62114	0.0679882	0.683752
101101916	KMT2A	NC_056068.1:28851816-28929657	5.07275	8.97078	-0.715801	0.0680039	0.683752
101120568	SLC35B4	NC_056057.1:99611930-99652026	0.968234	2.00773	-0.954895	0.0681867	0.6852
100302551	SLC39A13	NC_056068.1:76167205-76175531	13.0766	22.8249	-0.881682	0.0684257	0.686966
101106919	LOC101106919	NC_056055.1:138161635-138194353	88.2829	61.6341	0.659137	0.0684923	0.686966
101104767	OGFOD3	NC_056064.1:49832093-49848552	6.82593	3.58086	1.11548	0.0684941	0.686966
101122665	ARR3	NC_056080.1:63159090-63171157	0.0146703	0	6.39733	0.0684994	0.686966
101101881	TST	NC_056056.1:181059992-181067425	47.1807	28.2436	0.93911	0.0685749	0.687449
101123271	ACADL	NC_056055.1:211860043-211904014	33.8373	22.439	0.785107	0.0686382	0.687808
101104856	P4HA3	NC_056068.1:52287898-52389512	2.71851	1.25887	1.28954	0.0688247	0.689182
101114193	RASGEF1B	NC_056059.1:96920543-97585564	7.19352	14.163	-0.867776	0.0688303	0.689182
101113871	SLC23A2	NC_056066.1:46813534-46951715	10.8582	7.56563	0.695964	0.0689669	0.690225
101119164	COQ5	NC_056070.1:62931208-62946055	28.3501	19.1111	0.741583	0.0690137	0.690225
101110052	STK31	NC_056057.1:73562194-73655169	0.415731	0.0732557	2.32406	0.0690602	0.690225
101120520	ANAPC15	NC_056068.1:50467814-50471000	36.1789	20.2615	0.982752	0.0690806	0.690225
101118406	NPHP3	NC_056054.1:257548238-257603363	3.6597	6.42641	-0.669913	0.0690996	0.690225
105610011	USH2A	NC_056065.1:18116687-19056309	0.011627	0.00220867	2.55676	0.0691577	0.690522
101120576	COL25A1	NC_056059.1:16363618-16859020	0.18073	0.348074	-0.995192	0.0691891	0.690522
101110414	CDS1	NC_056059.1:100098187-100175175	6.84437	4.21244	0.896071	0.0692119	0.690522
101116794	CIART	NC_056054.1:100363198-100366689	6.02455	1.93367	1.69337	0.0692986	0.690838
101107508	LSP1	NC_056074.1:45967840-46012699	32.6434	52.0488	-0.791707	0.0693718	0.691156
101111785	WNT6	NC_056055.1:220834751-220847800	0.181757	1.09909	-2.53404	0.0693856	0.691156
100145857	BCKDHA	NC_056067.1:50096244-50114859	52.1894	31.6583	0.791911	0.069484	0.691211
101118606	LOC101118606	NC_056057.1:79023780-79119925	25.4969	15.8875	0.78982	0.0694984	0.691211
101105532	CHEK2	NC_056070.1:68150258-68196780	2.00378	4.32032	-1.08459	0.0695214	0.691211
100169940	ADRA1A	NC_056055.1:38854101-38970856	3.9084	7.60782	-0.842632	0.0695261	0.691211
101106208	KLHDC8B	NC_056072.1:50901923-50906710	19.8004	10.6493	1.1109	0.0695478	0.691211
101110391	PAK3	NC_056080.1:123793862-124373969	7.15307	13.077	-0.784363	0.0695714	0.691211
101113800	LOC101113800	NC_056072.1:12732663-12777391	0	0.007777	-6.28448	0.0695947	0.691211
101104256	RTN4RL1	NC_056064.1:22865995-22942531	0.770432	1.58426	-0.964287	0.0696116	0.691211
101106666	PASD1	NC_056080.1:84071326-84141367	0	0.00775567	-7.74478	0.0696754	0.691338
101115907	PXMP2	NC_056070.1:44557046-44569130	30.3792	15.5189	1.21159	0.069694	0.691338
101105434	RRAD	NC_056067.1:34194184-34197493	1.53781	4.94262	-1.61967	0.0697336	0.691338
121816395	LOC121816395	NC_056067.1:64235348-64244103	0.0207047	0	6.20401	0.0697889	0.691555
101111967	AFF1	NC_056059.1:102562895-102762044	5.47854	10.3101	-0.803612	0.0698118	0.691555
101119095	AFAP1L2	NC_056075.1:34301218-34455397	2.49823	4.58081	-0.77918	0.0698802	0.691687
101114367	MRPL15	NC_056062.1:35002495-35008026	13.7685	8.01457	0.977444	0.0699926	0.69198
101105029	CUX2	NC_056070.1:54854810-55130218	0.00772833	0	5.5573	0.0700959	0.692589
101118477	MTMR10	NC_056071.1:25188931-25232567	17.2345	11.7342	0.723393	0.0701235	0.692589
443089	LDHA	NC_056074.1:23836220-23848287	27.4534	52.7982	-0.856863	0.0701693	0.692635
101104877	MYOM1	NC_056076.1:37749111-37865482	1.52115	0.702911	1.25357	0.0703081	0.693459
101118850	VDAC3	NC_056079.1:36566817-36578605	92.5216	63.9749	0.724081	0.0704537	0.694408
114110058	LOC114110058	NC_056074.1:35488992-35490362	11.8558	4.65878	1.49983	0.0704956	0.694408
101115627	ITPKA	NC_056060.1:35128716-35137067	1.48545	4.53159	-1.52179	0.0705083	0.694408
101117149	MTLN	NC_056056.1:104789635-104790635	35.2381	16.8232	1.24361	0.0705381	0.694408
101123004	LDAF1	NC_056077.1:19456936-19472555	6.50445	13.116	-0.953961	0.0705688	0.694408
101117028	LOC101117028	NC_056054.1:27312245-27338121	22.0025	14.6029	0.786075	0.0705704	0.694408
101114785	RNASET2	NC_056061.1:89468388-89486121	44.2126	31.0535	0.686346	0.0706312	0.694734
101119787	RET	NC_056078.1:12797210-12853061	3.46861	9.25921	-1.3217	0.0706695	0.694747
101104197	TFF2	NC_056054.1:263296246-263299499	0	0.0611957	-6.27021	0.070688	0.694747
101110157	MRPS7	NC_056064.1:55567818-55571079	21.3031	12.2809	0.985746	0.0707995	0.695081
105603754	LOC105603754	NC_056073.1:25816182-25888047	0	0.00683067	-7.64884	0.0708146	0.695081
101107752	POLR3K	NC_056077.1:658814-661825	25.3043	14.3568	1.03378	0.0709096	0.69531
101120959	KCTD20	NC_056073.1:10477206-10514326	35.4219	23.7269	0.735696	0.0709469	0.695385
101121009	OAZ1	NC_056058.1:19078230-19081631	479.737	332.511	0.708423	0.0710115	0.695747
105605943	VSTM2B	NC_056067.1:795514-825251	2.97662	8.77321	-1.54045	0.0710583	0.695933
101114815	LIMK2	NC_056070.1:69950523-70002596	9.19951	5.8311	0.844201	0.0711535	0.696594
101103228	FKBP14	NC_056057.1:67872461-67884492	25.6144	15.3436	0.908758	0.0712735	0.697496
101115608	FRMPD3	NC_056080.1:127669199-127731625	0.00260467	0	6.17778	0.0713698	0.698166
101109988	PTER	NC_056066.1:30301744-30387477	2.51449	1.63751	0.764214	0.0714439	0.698618
101102076	SRCIN1	NC_056064.1:38887828-38961139	0.0515443	0.206257	-2.1373	0.0715921	0.699398
101112286	PHEX	NC_056080.1:20308527-20538496	0.16615	0.0686937	1.40826	0.0716073	0.699398
114110139	SCT	NC_056074.1:47063516-47064744	1.66381	0.236067	2.65031	0.0716917	0.699584
101116923	IKBKE	NC_056065.1:4077942-4100585	1.30648	3.23106	-1.18236	0.0717367	0.699584
101108153	PDCD5	NC_056067.1:42524191-42599133	57.1533	25.5595	0.748033	0.0718216	0.699584
101112277	CASTOR2	NC_056077.1:33068439-33122007	2.24856	1.29357	0.881323	0.0718338	0.699584
101111205	TM4SF5	NC_056064.1:26455766-26461977	0.0759797	0	7.48136	0.0718395	0.699584
101114566	RANBP9	NC_056073.1:42150204-42221769	15.05	10.7584	0.630754	0.0718772	0.699584
101113423	NT5M	NC_056064.1:34617393-34630219	6.57058	3.9806	0.903581	0.0718847	0.699584
101103724	EREG	NC_056059.1:90052787-90074310	0.158944	0.022946	3.04396	0.0719052	0.699584
101115686	EIF3I	NC_056055.1:235303700-235311403	53.424	36.6211	0.730398	0.0720435	0.700409
101108714	TNRC18	NC_056077.1:39298139-39386470	6.00119	10.7975	-0.753372	0.0720658	0.700409
100174786	MTNR1B	NC_056074.1:1481482-1503440	0	0.0215227	-7.6095	0.0720871	0.700409
101105435	ZNF114	NC_056067.1:54742675-54765141	1.36423	3.19418	-1.19474	0.0721329	0.700409
101108703	KCNK7	NC_056074.1:40218397-40221205	5.22142	1.65246	1.86149	0.0721402	0.700409
101103692	POLR3E	NC_056077.1:20519060-20550455	9.00743	6.24841	0.759938	0.0721576	0.700409
101114549	DNAJA2	NC_056067.1:14922562-14934715	60.9566	42.6506	0.695116	0.0722277	0.700818
101119912	IMPA1	NC_056062.1:93815732-93843667	11.9471	7.52047	0.822151	0.0723878	0.701829
101102522	C8B	NC_056054.1:31534318-31579387	0.248475	0.0428143	2.73362	0.0724303	0.701915
101120967	MSH4	NC_056054.1:52032213-52120600	0.470151	0.215105	1.32424	0.072456	0.701915
101103567	TIMM44	NC_056058.1:14417501-14430434	15.5464	10.2434	0.788422	0.0724806	0.701915
101119474	TLE5	NC_056058.1:18525392-18533653	69.9923	48.5826	0.668554	0.0725196	0.702021
101108328	ANKEF1	NC_056066.1:3080378-3108266	11.0897	7.11932	0.865777	0.0726952	0.702637
101123601	SLAMF9	NC_056054.1:110973081-110976029	0.0619323	0	6.21544	0.0728604	0.703962
101112503	LGALS4	NC_056067.1:47904364-47912598	2.97495	6.60142	-1.03023	0.0729827	0.704137
101113211	LOC101113211	NC_056071.1:67723152-67735094	23.6463	6.87405	1.74575	0.0729918	0.704137
101112980	TSPAN5	NC_056059.1:26503470-26690675	0.776949	1.40233	-0.76137	0.073002	0.704137
101111485	SDHD	NC_056068.1:22082742-22091592	70.1798	48.018	0.737699	0.0730189	0.704137
101102047	LOC101102047	NC_056056.1:180111908-180137251	8.58124	5.49772	0.960127	0.0730672	0.704332
106990093	EIF2S2	NC_056066.1:63488637-63506739	82.4245	58.1106	0.672396	0.0732595	0.705643
101113311	CHRDL1	NC_056080.1:124510671-124653083	165.616	114.475	0.671313	0.0733545	0.705853
101107140	BNC1	NW_024599827.1:1391329-1419355	0.00605167	0	6.25932	0.0733571	0.705853
114114098	PIM3	NC_056056.1:225271406-225274554	27.2448	16.2954	0.925424	0.0734111	0.705853
101111357	ZBTB34	NC_056056.1:9236182-9262596	2.92273	5.52879	-0.81095	0.0736979	0.707755
101116677	SYT13	NC_056068.1:74202803-74246089	0	0.0106277	-7.56906	0.0737045	0.707755
101116615	ESRRA	NC_056074.1:39054074-39062262	21.6024	12.1336	0.944312	0.0739066	0.709424
101121222	TECTB	NC_056075.1:32347988-32367140	1.13509	0.175649	2.8685	0.0742752	0.712417
101113488	LOC101113488	NC_056056.1:2687220-2691069	29.4115	18.1279	0.874776	0.0743557	0.712916
101112707	SNTG2	NC_056055.1:633971-760162	0.003049	0	7.39729	0.0745046	0.713828
101112335	AOC3	NC_056064.1:42605713-42612561	175.448	309.434	-0.666712	0.0745077	0.713828
100620046	TOB2	NC_056056.1:218367162-218377340	11.0669	21.0958	-0.721786	0.074599	0.71443
101119401	COL22A1	NC_056062.1:17018833-17248213	0	0.00199233	-7.5484	0.0746549	0.714693
101111158	GOT1L1	NC_056079.1:32270324-32276452	0	0.031831	-6.30331	0.0747074	0.714725
106991148	ASB10	NC_056057.1:115366687-115383876	0.392942	0.0375993	2.62098	0.0747526	0.714725
101122067	CCDC80	NC_056054.1:178308924-178343817	199.223	128.636	0.765842	0.0748072	0.714725
101103284	NUDT16L1	NC_056077.1:4366295-4368816	19.9978	8.30813	1.37844	0.0748316	0.714725
101104540	NGF	NC_056054.1:92653624-92709627	0.290034	0.734352	-1.36059	0.0748602	0.714725
101111663	MTFP1	NC_056070.1:69425425-69433021	2.3585	0.6586	1.95685	0.0748771	0.714725
101122238	PAPSS2	NC_056075.1:9048651-9152485	3.22021	1.90196	0.950335	0.0748863	0.714725
101119608	SEMA5B	NC_056054.1:188094348-188227668	0.500954	0.94025	-0.85598	0.0749691	0.714972
101113802	RUVBL1	NC_056072.1:59391849-59422639	18.8706	13.1322	0.701856	0.075097	0.715561
101105796	METTL22	NC_056077.1:8065780-8084908	18.8289	12.3646	0.76839	0.0751346	0.715561
114116368	LOC114116368	NC_056062.1:43029556-43070247	70.9946	41.0321	0.918473	0.075145	0.715561
101111874	CRACDL	NC_056056.1:102307498-102432933	0	0.0180143	-5.51081	0.0751891	0.715709
101112812	MRPL34	NC_056058.1:5591821-5593389	33.805	17.7011	1.1319	0.0753742	0.717199
101119758	HCAR1	NC_056070.1:52819903-52823159	8.54019	18.4876	-0.999286	0.0754921	0.717772
101108651	RNF14	NC_056058.1:50689585-50708757	16.2159	10.8098	0.806198	0.0755203	0.717772
101123639	RRM2B	NC_056062.1:75080884-75117252	8.16862	5.29776	0.754075	0.0756018	0.718201
100048989	YBX1	NC_056054.1:17184299-17203415	304.511	213.62	0.688462	0.0756691	0.718209
100147788	SLC25A5	NC_056080.1:114995510-114997960	24.4475	13.5314	1.06727	0.0756849	0.718209
101122837	TTN	NC_056055.1:131323488-131600878	0.057292	0.0248937	1.6554	0.0757558	0.718209
101105319	LRATD1	NC_056056.1:23149509-23153982	16.7305	6.28433	1.52259	0.075795	0.718209
101106014	DAD1	NC_056060.1:22030887-22053160	72.7435	51.1987	0.672886	0.0759627	0.719013
101113575	TAFA2	NC_056056.1:157484921-158054101	0.052203	0.009381	2.6757	0.0760484	0.719013
101116416	TAS1R1	NC_056065.1:46176012-46184399	0.0181733	0	6.19707	0.0760522	0.719013
101110536	HTR3A	NC_056068.1:24218786-24231880	0.0123687	0	6.22256	0.0761119	0.719035
101112182	MYO5B	NC_056076.1:49792901-50130336	3.89235	2.28733	0.969196	0.0763278	0.720104
101116591	TPD52L2	NC_056066.1:53640505-53656625	47.602	33.7179	0.676033	0.0764331	0.720104
114108871	LOC114108871	NC_056070.1:15044195-15201737	0.313032	0.125763	1.48809	0.0764344	0.720104
101120606	MZT2B	NC_056070.1:72430396-72434588	26.225	16.0515	0.868922	0.0764664	0.720104
114115882	LOC114115882	NC_056060.1:74916150-74962089	0.430706	1.12824	-1.23843	0.0764835	0.720104
101104800	ALG1	NC_056077.1:4656861-4670700	10.5223	6.44135	0.879024	0.0766023	0.720683
101110250	ZNHIT3	NC_056064.1:12546255-12553354	22.1075	14.0176	0.86469	0.0766926	0.720991
101107173	HMGB3	NC_056080.1:84600909-84605800	1.24554	0.300959	2.19348	0.0768369	0.721819
101108592	LOC101108592	NC_056066.1:44699054-44751444	9.36093	17.3762	-0.819903	0.0768383	0.721819
101102430	CIDEC	NC_056072.1:16828454-16845137	707.77	487.953	0.67561	0.0769017	0.722145
101104796	SLC18A2	NC_056075.1:37101447-37142745	0.110529	0.384053	-1.63482	0.0769522	0.722349
101120377	MPG	NC_056077.1:687979-695210	31.8294	21.8508	0.713068	0.0770681	0.722916
101104354	TMEM126A	NC_056074.1:9426013-9434760	18.0944	11.6795	0.833718	0.077128	0.722916
101110297	C25H10orf99	NC_056078.1:38184538-38193265	0.0461403	0	7.57977	0.0772109	0.723275
101108809	C2CD6	NC_056055.1:203815742-203940080	0	0.00385067	-7.56374	0.0772265	0.723275
101109081	SEPTIN5	NC_056070.1:72820885-72828603	7.56788	3.99063	1.08081	0.0772816	0.723275
105605792	LOC105605792	NC_056056.1:218902079-218939225	3.07256	1.33581	1.40426	0.0774839	0.724871
101117734	NDUFB11	NC_056080.1:57660415-57662632	106.458	71.8622	0.744116	0.0776949	0.72546
101104666	SAV1	NC_056060.1:41755573-41784098	23.1313	16.0834	0.678637	0.0777384	0.72546
101106106	PGM2L1	NC_056068.1:52409585-52469988	4.60571	9.03036	-0.904713	0.0777422	0.72546
101122631	MRPS11	NC_056071.1:18869917-18880756	20.8735	14.2287	0.719858	0.0777465	0.72546
101116126	ARL6IP6	NC_056055.1:156864825-156903637	5.82666	10.176	-0.706129	0.0778101	0.725766
101112473	REXO4	NC_056056.1:2640559-2648569	13.7959	8.46347	0.892661	0.0778372	0.725766
101121817	TXNL1	NC_056076.1:56268247-56302089	73.1091	49.0896	0.683877	0.077885	0.725942
101108454	TIMM17B	NC_056080.1:56178694-56182653	23.0723	13.9071	0.921829	0.0780076	0.726677
101123479	BRINP3	NC_056065.1:14301091-14718995	0.482219	0.0487787	3.57272	0.078055	0.726677
101118702	ERH	NC_056060.1:79278431-79291266	84.6506	58.2911	0.731145	0.0780714	0.726677
100134870	LOC100134870	NC_056068.1:47990592-47992155	0	0.112022	-6.16914	0.0780797	0.726677
101104062	HINT1	NC_056058.1:21046462-21052574	108.118	71.6078	0.768936	0.0781668	0.727218
101113032	LOC101113032	NC_056073.1:39598997-40016271	10.4801	6.84786	0.719952	0.0784647	0.728908
101117713	MOV10	NC_056054.1:90069771-90096616	2.31891	4.56489	-0.87534	0.0787359	0.731157
101102131	PINK1	NC_056055.1:245716754-245733922	53.2621	35.7751	0.750406	0.0791132	0.733389
101120033	LOC101120033	NC_056075.1:20618346-20732822	9.78479	16.8503	-0.648155	0.0791614	0.733389
101103916	LOC101103916	NC_056067.1:33853983-33872287	0	0.025967	-7.43221	0.079175	0.733389
100528010	AVPR1A	NC_056056.1:156500149-156503676	8.76758	3.95942	1.37512	0.0791957	0.733389
101122213	MMP15	NC_056067.1:25527753-25548773	25.8212	15.7943	0.890531	0.079329	0.734218
100500781	VIPR2	NC_056057.1:121224353-121290755	2.01741	0.50362	1.9691	0.0794207	0.734626
101121984	AK5	NC_056054.1:53742716-54015273	0.273912	0.0460253	2.75933	0.0794317	0.734626
101121878	IGLON5	NC_056067.1:57470409-57486385	0	0.011564	-6.13829	0.0795525	0.735202
101119389	GALR3	NC_056056.1:215462919-215464815	0.348032	0.0244553	3.86957	0.0796638	0.735278
101116134	TTLL1	NC_056056.1:219744944-219810459	3.14538	1.67186	1.09364	0.0796781	0.735278
101111294	STMN2	NC_056062.1:55888846-55947813	0.153824	0.026938	2.61732	0.0797398	0.735576
101106419	LOC101106419	NC_056056.1:219398058-219423339	122.292	86.2286	0.680565	0.0798902	0.736423
101104058	NUB1	NC_056057.1:115514670-115551026	69.8076	47.5999	0.741138	0.0800802	0.737718
101105090	LOC101105090	NC_056065.1:50403098-50419622	7.31749	4.48789	0.908696	0.0801016	0.737718
101110508	ACSBG2	NC_056058.1:16081363-16121407	0	0.011465	-7.49796	0.0801337	0.737718
101103775	SPTSSB	NC_056054.1:226714574-226743973	0.013772	0	7.27461	0.0802054	0.737972
101117083	SNX3	NC_056061.1:29179009-29227896	115.582	81.994	0.674789	0.0803162	0.73872
101122423	WNT4	NC_056055.1:244422061-244450787	0.365503	1.19043	-1.68454	0.0804012	0.739232
101101879	EML6	NC_056056.1:69039941-69330207	1.17292	2.37505	-0.962455	0.0804365	0.739285
101103929	RBMS3	NC_056072.1:3870808-4687682	14.5335	25.3974	-0.687812	0.0805852	0.74038
101108411	ECHDC3	NC_056066.1:15818742-15852827	34.2944	23.8049	0.717959	0.0806927	0.740826
114116333	LOC114116333	NC_056054.1:86993313-87006498	122.605	86.326	0.666088	0.0807332	0.740926
101116384	TBC1D8B	NC_056080.1:128473024-128549147	1.86655	3.46248	-0.796646	0.0808397	0.741013
101106440	ST18	NC_056062.1:34144567-34374877	0.00403733	0.0277893	-2.61867	0.0809516	0.741013
105605821	LOC105605821	NC_056056.1:799203-812337	0.407801	1.38899	-1.83684	0.0809537	0.741013
101110931	VWF	NC_056056.1:210052637-210176248	42.8121	72.7679	-0.6655	0.0810427	0.741013
101116808	RCAN3	NC_056055.1:242139732-242179403	2.27742	4.08074	-0.786765	0.0810845	0.741013
101108648	WEE2	NC_056057.1:106377063-106409230	0.0107257	0	7.23928	0.081118	0.741013
101116442	DSC3	NC_056076.1:26423312-26481956	0.0961887	0.0129827	2.97672	0.0811246	0.741013
101119862	LIPK	NC_056075.1:10213777-10252703	0.0103337	0	7.2497	0.081125	0.741013
101113821	KY	NC_056054.1:255348386-255398255	0.80235	0.408107	2.01927	0.0812023	0.741033
101105693	SETD5	NC_056072.1:17096736-17176815	8.93085	14.9202	-0.663883	0.0812853	0.741033
101120263	TSHZ2	NC_056066.1:80594381-81088039	1.55231	2.75319	-0.636693	0.0813105	0.741033
101105627	PBLD	NC_056078.1:23944313-23979564	24.8584	16.2878	0.777164	0.0813681	0.741033
XLOC_061388	XLOC_061388	NC_056060.1:28825938-28911309	2.1706	1.20168	0.825617	0.081393	0.741033
101110738	SUMO1	NC_056055.1:204475308-204551859	38.2083	26.9	0.678575	0.0813948	0.741033
121819513	LOC121819513	NC_056057.1:83295313-83424278	0.037852	0.423003	-3.22495	0.0815284	0.741944
101103406	FBXO39	NC_056064.1:25016838-25021896	0	0.0175677	-5.33527	0.0815541	0.741944
101101995	COPS5	NC_056062.1:44147254-44164133	29.997	21.0314	0.69541	0.0816698	0.742688
101108743	CREB3L2	NC_056057.1:103027915-103163545	12.4605	21.2732	-0.671615	0.0817096	0.742688
101123002	EMILIN2	NC_056076.1:37568503-37626682	11.9368	21.9008	-0.819392	0.0818477	0.743251
101110965	DLAT	NC_056068.1:22028592-22060302	13.602	9.28498	0.745675	0.0819181	0.743369
101107882	PAK5	NC_056066.1:2390949-2814662	0.0358257	0.196229	-2.49103	0.0820292	0.744048
101112247	DNAAF9	NC_056066.1:51495567-51676345	10.0376	16.029	-0.646256	0.0821571	0.74446
101118698	EDIL3	NC_056058.1:81393256-81867391	15.5862	35.7358	-1.13146	0.0822335	0.744655
101117581	CEP41	NC_056057.1:95809132-95857309	2.34296	4.09685	-0.831848	0.0822639	0.744655
105613904	ANKDD1A	NC_056060.1:11817912-11867062	0	0.00906367	-7.35261	0.0822974	0.744655
101119259	CISH	NC_056072.1:49803328-49843826	1.46674	3.95414	-0.949444	0.0823516	0.744741
101115289	MYO16	NC_056063.1:83158060-83686037	0.0564347	0.0216393	1.59489	0.0824348	0.744741
101113054	PLB1	NC_056056.1:35450373-35572156	0.0554017	0.0123403	2.37815	0.0826194	0.745686
101123335	LTO1	NC_056074.1:43302843-43310188	20.432	13.4241	0.80446	0.0827333	0.746224
101104949	B4GALT4	NC_056054.1:184896664-184924341	3.54131	7.3788	-1.0096	0.0827385	0.746224
101123588	LOC101123588	NC_056072.1:43433261-43589792	31.4497	21.8218	0.651774	0.0827881	0.746239
101120048	CYLC2	NC_056055.1:20196577-20369207	0	0.00251767	-7.42904	0.0829336	0.746239
101117658	TMEM52B	NC_056056.1:205302622-205312717	0.015272	0	6.0684	0.0829507	0.746239
101118655	DSG2	NC_056076.1:25942401-25993705	0.042491	0.005354	2.9791	0.0829949	0.746239
100048991	KLK1	NC_056067.1:56618658-56623725	0.0126527	0.18587	-3.82298	0.0830101	0.746239
101113585	CDC37	NC_056058.1:12781269-12792510	103.837	72.9975	0.687455	0.0830458	0.746239
[truncated: 16,545 more rows]

## Sheet: HUS vs SFK
gene_id	gene_name	gene_locus	HUS_FPKM	SFK_FPKM	log2FoldChange	pvalue	padj
443274	GRIA4	NC_056068.1:1498196-2166450	0.147963	0	14.664	1.87867e-26	1.57226e-22
101120301	ADAM18	NC_056079.1:34182248-34323718	0	3.18459	-14.6455	7.64837e-22	4.80069e-18
101119692	HS3ST4	NC_056077.1:23821410-24302416	0	0.216095	-15.2388	9.62162e-21	4.8314e-17
121820152	LOC121820152	NC_056061.1:15323848-15353798	7.23333e-05	1.08019	-11.2731	3.98784e-15	1.25153e-11
101102396	GREM1	NC_056060.1:28161952-28176990	45.9389	3.27714	3.86034	6.59284e-15	1.83918e-11
101116376	KLKB1	NC_056079.1:15452076-15474273	8.08135	0.36281	4.38185	1.51382e-13	3.45522e-10
443175	BMP7	NC_056066.1:58543775-58626484	0.312222	2.97048	-3.10554	8.79953e-12	1.73882e-08
101106522	TRPC7	NC_056058.1:45278881-45428855	0.328436	0	12.9024	9.00336e-12	1.73882e-08
101111592	LMX1A	NC_056054.1:117169151-117341122	0.195163	1.51896	-2.87134	2.0529e-11	3.68159e-08
101108612	F13A1	NC_056073.1:47927227-48068069	20.6845	155.743	-2.81642	9.32987e-11	1.56163e-07
101120407	POU6F2	NC_056057.1:83025849-83159231	0.013184	0.449188	-4.892	2.35035e-10	3.51623e-07
101113649	CLDN11	NC_056054.1:217682947-217697791	2.26631	16.3238	-2.69571	2.38085e-10	3.51623e-07
101110446	DNHD1	NC_056068.1:46229225-46299141	0.022047	1.64646	-6.17738	3.75493e-10	5.2207e-07
100820740	TNXB	NC_056073.1:26346081-26399925	22.0414	104.973	-2.08824	3.95082e-10	5.2207e-07
101105294	LGI1	NC_056075.1:14840801-14877030	0.031592	4.36617	-7.00402	5.3371e-10	6.38088e-07
101112777	SLIT1	NC_056075.1:18106436-18281138	0.0150777	0.370155	-4.50303	6.50772e-10	7.42679e-07
101112182	MYO5B	NC_056076.1:49792901-50130336	3.89235	0.418313	3.41043	9.43797e-10	1.03026e-06
101112575	SNTG1	NC_056062.1:33295517-33701141	0.165898	0	14.0474	1.3294e-09	1.39072e-06
101120348	KCNH1	NC_056065.1:71671583-72092529	0.0340663	0.337096	-3.18251	1.8037e-09	1.81142e-06
100170321	CDH2	NC_056076.1:29012499-29254079	1.73213	0.395771	2.25758	3.15094e-09	2.93003e-06
101112715	KERA	NC_056056.1:127466168-127473668	1.0849	19.0574	-3.94317	5.26064e-09	4.7171e-06
101110341	LOC101110341	NC_056062.1:31108300-31177803	1.20548	8.40323	-2.65448	5.85295e-09	5.06724e-06
101104034	PPL	NC_056077.1:4517678-4565768	10.6548	45.4737	-1.98045	1.35292e-08	1.13226e-05
101119401	COL22A1	NC_056062.1:17018833-17248213	0	0.37609	-15.0038	1.90555e-08	1.49508e-05
101102235	ADAMTS19	NC_056058.1:22187748-22453471	0.432478	2.98474	-2.70337	2.10542e-08	1.60184e-05
101105703	PLCE1	NC_056075.1:15049874-15426052	0.765139	3.9252	-2.27541	2.20023e-08	1.62474e-05
101102850	ACKR3	NC_056054.1:4622543-4635069	11.0733	53.9959	-2.15376	2.57591e-08	1.84781e-05
101111081	PLA2R1	NC_056055.1:149665404-149793734	74.2686	11.118	2.87794	2.83633e-08	1.9781e-05
101121848	NXPH1	NC_056057.1:17300516-17665790	0.114451	1.00082	-3.01578	3.83117e-08	2.5313e-05
101119516	NEGR1	NC_056054.1:47146824-48165091	0.673268	0.086976	3.02771	4.68233e-08	2.89037e-05
443361	NPY1R	NC_056059.1:2682365-2691584	0.236103	7.86977	-4.93561	4.72e-08	2.89037e-05
101123575	HSD17B14	NC_056067.1:55170303-55189408	15.1978	1.79901	3.28577	7.13447e-08	4.26488e-05
101114059	ASB2	NC_056071.1:56316870-56364930	16.1362	4.74746	1.8795	7.77704e-08	4.37557e-05
101120331	SULT1E1	NC_056059.1:86074358-86132345	0.969531	0	14.5525	7.84247e-08	4.37557e-05
101103866	TMEM130	NC_056077.1:37796204-37812216	0	0.425246	-11.345	8.13264e-08	4.43883e-05
101108443	CLSTN2	NC_056054.1:248958322-249703516	0.165025	0.70192	-1.96088	9.92115e-08	5.28553e-05
101121501	CTNNA2	NC_056056.1:50614437-52019005	0	0.03571	-14.2199	1.0105e-07	5.28553e-05
101121758	GLIPR1	NC_056056.1:111483100-111521328	14.7612	2.76344	2.4711	1.10471e-07	5.54719e-05
101117246	ATP10B	NC_056058.1:69761611-70142332	0	0.0189437	-11.2724	1.32215e-07	6.50887e-05
443389	TTR	NC_056076.1:25886082-25894574	37.4082	0.0233573	10.6143	1.49434e-07	7.21509e-05
101117563	TENM1	NC_056080.1:108317516-109217761	1.99154	0.614917	1.80991	1.54792e-07	7.33275e-05
100913155	GABRB2	NC_056058.1:70506031-70815285	0.728738	0.0890793	2.95568	2.23892e-07	0.000104098
101111950	SLC3A1	NC_056056.1:80003432-80041556	0.199677	2.88043	-3.70747	2.92259e-07	0.00012715
101111396	LOC101111396	NC_056070.1:13531288-13647469	0.0465897	0.781888	-3.9166	2.93731e-07	0.00012715
101123633	DKK2	NC_056059.1:18492309-18618733	1.98197	7.8099	-1.80083	3.09012e-07	0.000129306
101117611	TOX3	NC_056067.1:20423244-20543404	0	0.041757	-10.72	4.54706e-07	0.000184134
101102679	CPNE5	NC_056073.1:10744449-10845889	0.14197	1.04798	-2.78135	4.69285e-07	0.000187021
101107460	ANGPT4	NC_056066.1:59854076-59900701	3.49557	17.585	-2.17451	5.53153e-07	0.000213662
101109862	SRPX2	NC_056080.1:134153649-134185215	0.876062	5.82804	-2.56617	6.7512e-07	0.000252988
101108576	SLC27A2	NC_056060.1:58170586-58223203	1.40858	0.174101	3.11608	7.13275e-07	0.000263356
100190977	CKB	NC_056071.1:65892861-65896013	166.544	26.9761	2.83379	7.41645e-07	0.000269862
114117992	LOC114117992	NC_056067.1:50167230-50183567	11.1839	61.5195	-2.35393	7.64324e-07	0.000274141
101112943	LOC101112943	NC_056054.1:98043124-98088738	3.43124	0.42647	3.40424	9.58449e-07	0.000334219
101123022	VIT	NC_056056.1:87222472-87347983	2.79734	22.5216	-2.82403	1.19188e-06	0.000409926
101103801	ACSS3	NC_056056.1:117145188-117318853	16.6497	4.06037	2.12246	1.29866e-06	0.000440614
114109673	TOMM6	NC_056073.1:15634792-15647892	31.8351	1.56572	3.77613	1.36634e-06	0.000457395
101123479	BRINP3	NC_056065.1:14301091-14718995	0.482219	0	13.0546	1.91577e-06	0.000632886
101110397	RP1L1	NC_056055.1:104442682-104537575	0	0.695	-10.92	2.34029e-06	0.000753302
101109620	FBN1	NC_056060.1:59766618-60043865	68.644	226.048	-1.60987	2.38416e-06	0.000757709
101104733	PKP2	NC_056056.1:182513473-182604604	6.61941	1.91222	1.94973	2.79475e-06	0.000866269
101113460	FBP2	NC_056055.1:31846746-31897446	8.38157	0.65145	3.89011	2.958e-06	0.00090569
101114659	DGKG	NC_056054.1:201655734-201881911	0.147355	0.698786	-2.13804	3.25047e-06	0.000973089
101120653	LOC101120653	NC_056056.1:194481530-194556137	3.19515	0.085358	5.45204	3.25564e-06	0.000973089
443264	LEPR	NC_056054.1:41094622-41249768	30.4861	6.25776	2.32205	3.62126e-06	0.00106963
101113839	SEMA3E	NC_056057.1:38401126-38680384	0.109889	0.527629	-2.14355	3.76019e-06	0.00109776
114115898	LOC114115898	NC_056060.1:95234605-95334723	3.85994	11.7049	-1.59336	3.89009e-06	0.00110425
101107231	BMP5	NC_056073.1:4655234-4799355	25.1661	9.06626	1.60615	3.90142e-06	0.00110425
101108195	LYPD1	NC_056055.1:178329818-178388363	2.81436	0.499426	2.68813	4.23049e-06	0.00116696
101119373	GPR143	NC_056080.1:399613-430432	0.18062	1.6747	-3.05373	4.48461e-06	0.00119782
101115946	THSD7B	NC_056055.1:173013644-174062362	0.014587	0	12.6088	4.55444e-06	0.00120367
101108882	SPSB4	NC_056054.1:248420784-248510055	0.248893	1.34707	-2.29582	4.94985e-06	0.00129454
101120262	MKX	NC_056066.1:36243650-36312525	2.01376	0.239812	3.28392	5.37994e-06	0.00138073
101119143	RSPO2	NC_056062.1:69316960-69503711	0	0.099124	-12.8037	5.38941e-06	0.00138073
101106322	CNTNAP2	NC_056057.1:110539864-112881563	0.435368	0.05316	2.06914	5.67825e-06	0.00144004
101108832	NDNF	NC_056059.1:4661867-4710532	0.598642	3.12886	-2.21242	6.00856e-06	0.00150622
101118853	ANOS1	NC_056080.1:1336521-1558611	0.192711	1.00318	-2.21137	6.0592e-06	0.00150622
XLOC_041294	XLOC_041294	NC_056057.1:67153027-67157400	4.63899	0.0859013	5.93851	6.82557e-06	0.0016801
101108619	CIDEA	NC_056076.1:43297142-43307738	78.3389	27.554	1.65739	7.45457e-06	0.00180047
101117946	KRT19	NC_056064.1:41472689-41476482	0.288828	5.76607	-4.24248	7.91231e-06	0.00189195
101112819	LOC101112819	NC_056059.1:10825466-11169213	0	0.009074	-10.1937	8.21731e-06	0.00194634
101102230	LOC101102230	NC_056057.1:41667753-41743177	14.9969	2.73995	2.65492	9.17134e-06	0.00213208
101103299	TM4SF20	NC_056055.1:229597163-229673592	1.42518	0.036068	6.36114	1.00685e-05	0.00229808
101119185	TNFAIP6	NC_056055.1:158145022-158162886	4.12931	19.6248	-2.18816	1.11429e-05	0.00252041
121816115	LOC121816115	NC_056065.1:14782978-14811675	0.420054	0	12.3544	1.12751e-05	0.00252753
101101882	HMCN2	NC_056056.1:6154936-6327447	0.0428737	0.515792	-3.52877	1.14745e-05	0.00254948
101114226	LOC101114226	NC_056054.1:78066630-78089497	31.6418	167.685	-2.29117	1.15761e-05	0.00254948
101112537	NRG3	NC_056078.1:35919548-37160225	0	0.00940567	-12.1323	1.33676e-05	0.00286855
101104337	ELMOD1	NC_056068.1:16728218-16815556	20.6694	4.24149	2.47921	1.40642e-05	0.00299246
101104729	PPFIA2	NC_056056.1:117319666-117828677	0	0.0257083	-12.0866	1.49896e-05	0.00316256
101108200	LRP2	NC_056055.1:140096304-140279121	0.000916333	0.62358	-9.43616	1.55487e-05	0.00320248
101114972	ATF5	NC_056067.1:56002128-56006723	73.4789	26.6208	1.61614	1.55615e-05	0.00320248
101111507	DTNA	NC_056076.1:22491651-22797967	1.30048	5.69618	-1.83416	1.71882e-05	0.00348941
100125611	SLIT2	NC_056059.1:40397721-40801150	4.0704	0.92566	2.15952	1.72337e-05	0.00348941
101111399	OSBPL10	NC_056072.1:6197777-6519599	0.480949	1.5184	-1.53643	1.86044e-05	0.00370715
101113100	C1QTNF3	NC_056069.1:39884732-39917354	18.7517	2.21524	3.10288	1.96363e-05	0.00388197
101114407	P2RY1	NC_056054.1:235652570-235659404	13.3644	1.94488	2.86004	1.98858e-05	0.00390056
101107621	PFKFB3	NC_056066.1:10930780-11011954	25.7232	9.48206	1.59003	2.05044e-05	0.00399073
101105349	ISM1	NC_056066.1:6626630-6716009	1.34571	5.01235	-1.79717	2.17665e-05	0.00418866
101106121	LOC101106121	NC_056054.1:21664166-21715251	0	15.8686	-18.2681	2.1855e-05	0.00418866
101107668	ELAVL2	NC_056055.1:92426299-92570987	0	0.016841	-9.86236	2.21333e-05	0.00420985
101116673	FA2H	NC_056067.1:1635997-1690733	0	0.0538973	-10.1046	2.2393e-05	0.00422723
101115091	CDR2	NC_056077.1:20557697-20585984	17.1434	3.93858	2.3262	2.27833e-05	0.00426881
105616741	LOC105616741	NC_056066.1:67284818-67312465	0.0895023	5.25242	-5.67762	2.43912e-05	0.00453622
101118004	LOC101118004	NC_056056.1:131734361-131739875	0	73.1815	-17.2616	2.55866e-05	0.00472356
101111631	LOC101111631	NC_056058.1:65940871-65974701	1.86686	8.79301	-1.79692	2.68403e-05	0.00491883
101104909	HS3ST1	NC_056059.1:107160286-107196368	0.425537	2.51364	-2.4493	2.84495e-05	0.00517595
101107690	HK2	NC_056056.1:96669457-96737497	3.3501	0.836339	2.20372	3.04909e-05	0.0054872
101121916	LOC101121916	NC_056080.1:11606390-11659248	2.04954	0.034705	5.91608	3.05973e-05	0.0054872
101117229	LOC101117229	NC_056077.1:35936362-35970542	27.1149	3.7804	2.8249	3.26884e-05	0.00577963
101115823	BBOX1	NC_056068.1:56517646-56588855	0	0.198025	-12.3441	3.32662e-05	0.00584067
XLOC_094936	XLOC_094936	NC_056068.1:37606274-37610156	0.0100067	4.84512	-8.7728	3.47329e-05	0.00605583
101113643	MEIOB	NC_056077.1:1928697-1963471	0.745921	4.21544	-2.33403	3.65463e-05	0.00631008
101121046	ATP2B2	NC_056072.1:54327888-54705889	0.0161337	0.151746	-3.08543	3.66938e-05	0.00631008
101103997	RGS8	NC_056065.1:63144340-63191836	0.05011	0.801224	-3.80896	4.44942e-05	0.00739812
105604608	HS3ST6	NC_056077.1:2009163-2015314	2.08923	11.7277	-2.36911	4.80619e-05	0.00784311
101104743	SLC27A6	NC_056058.1:22816729-22889057	3.48311	1.06051	1.88456	4.87324e-05	0.00784311
101114456	LOC101114456	NC_056065.1:4847404-4946208	7.03074	35.2913	-2.22555	5.72906e-05	0.00887898
443444	PGR	NC_056068.1:7529153-7638366	4.30015	1.41973	1.66834	5.85737e-05	0.00902215
101109916	TGM5	NC_056071.1:52825720-52856534	6.94597	0.270815	4.92683	6.08361e-05	0.00931349
101119750	BLVRB	NC_056067.1:49194479-49212054	88.2987	38.5941	1.33577	6.48441e-05	0.00982026
101109822	GPT2	NC_056067.1:14860042-14894080	23.0641	3.36693	3.00259	6.49286e-05	0.00982026
101102712	SYT1	NC_056056.1:114928514-115562807	0	0.011847	-11.4932	6.68508e-05	0.0100504
101106846	NPY5R	NC_056059.1:2657105-2668041	0.037301	1.53738	-5.23602	6.73467e-05	0.0100647
101102920	WFDC1	NC_056067.1:10096297-10126391	32.2774	11.5153	1.57152	6.86356e-05	0.0101967
101103009	LYVE1	NC_056068.1:41819090-41833662	7.7083	28.2719	-1.77133	7.01853e-05	0.0103049
101121539	LOC101121539	NC_056067.1:49474513-49485948	34.2004	6.87989	2.44053	7.07154e-05	0.0103224
101114123	SOST	NC_056064.1:43391559-43396467	42.6523	4.07893	3.62014	7.26864e-05	0.0105488
101109387	GLYATL2	NC_056068.1:80865705-80874243	0	8.12539	-14.7215	7.36359e-05	0.0106251
101112454	CCDC148	NC_056055.1:150996807-151566213	0.0274627	0.313185	-3.37594	7.65039e-05	0.010968
101120910	HMOX1	NC_056056.1:179234915-179243214	17.3008	5.49784	1.82223	7.7418e-05	0.010968
101115646	LOC101115646	NC_056067.1:1324021-1336675	8.81962	0.785145	3.62282	7.7547e-05	0.010968
101112455	TMEM255A	NC_056080.1:104603929-104652144	1.15069	3.80088	-1.62149	7.90188e-05	0.0110834
101114420	TFCP2L1	NC_056055.1:186531955-186601787	2.02777	0.145123	3.95601	7.9551e-05	0.011096
443279	CHI3L1	NC_056065.1:750821-763781	54.2371	15.0317	2.08147	8.10287e-05	0.0112397
101113069	UGT8	NC_056059.1:11303770-11407050	0.0288697	0.359652	-3.54469	8.15258e-05	0.0112465
100233164	CNGA3	NC_056056.1:102835910-102877356	0.0433307	0	9.44808	8.44527e-05	0.0115866
101116033	MBOAT2	NC_056056.1:18338394-18446293	12.0917	3.54094	1.95718	8.58633e-05	0.0117161
494437	SLC9A3	NC_056069.1:71652463-71689063	0.150868	2.00938	-3.48721	8.71552e-05	0.0118281
101109353	FGF1	NC_056058.1:51264564-51383245	25.4468	5.40253	2.44054	9.00568e-05	0.0121562
101103643	HAPLN1	NC_056058.1:81084161-81161129	0.132879	0	11.7777	9.1604e-05	0.0122989
101105007	XKR9	NC_056062.1:47328141-47353749	0	0.06863	-9.3887	9.49542e-05	0.0126809
101118937	SYN3	NC_056056.1:176723348-177203724	0.067599	0.280784	-1.90409	9.78224e-05	0.0129948
101110183	FBLN2	NC_056072.1:58245049-58308012	24.1676	66.4214	-1.32991	9.89884e-05	0.0130805
114111402	LOC114111402	NC_056080.1:4338577-4412728	0	5.52976	-14.3464	9.95322e-05	0.0130835
114118072	LOC114118072	NC_056067.1:63850368-63909334	0.203299	1.67198	-2.91261	0.000106014	0.0137912
101117888	OPCML	NC_056074.1:30857247-31902052	0	0.00602933	-11.1414	0.000108881	0.0139473
101110208	LOC101110208	NC_056055.1:10736406-10741504	0	9.42116	-14.1912	0.000112049	0.0142458
100187551	IGFBP6	NC_056056.1:133353218-133358178	43.8707	163.514	-1.63656	0.000112346	0.0142458
443054	GSTA1-1	NC_056073.1:24748145-24761908	288.463	56.0787	2.55831	0.000117084	0.014772
101111393	FAM169A	NC_056069.1:6846812-6914781	4.87336	0.75084	2.95965	0.000118453	0.0148701
101119811	CFAP54	NC_056056.1:166295238-166620965	0.280533	0.854587	-1.48979	0.000121995	0.0152384
101120979	EFHB	NC_056054.1:278003280-278201150	9.28365	2.93245	1.8009	0.000124446	0.0154424
101114569	COL24A1	NC_056054.1:62852698-63246629	0.927337	0.108451	3.29522	0.000125678	0.0154424
101110740	TLE1	NC_056055.1:55244976-55336967	1.69822	5.00781	-1.46128	0.000125687	0.0154424
101121478	GREB1L	NC_056076.1:35119338-35364837	1.25342	0.372696	1.8332	0.000126768	0.0154424
101114977	AACS	NC_056070.1:50762459-50815793	33.9177	7.73585	2.33153	0.000127315	0.0154424
101110034	HS6ST2	NC_056080.1:101884216-102255198	0.128681	0.440323	-1.64828	0.000128183	0.0154725
101108960	DNAH12	NC_056072.1:43748189-43925231	0.648829	0.069695	3.30565	0.000133845	0.0160787
101120648	EFEMP1	NC_056056.1:68209719-68279889	21.5103	88.0338	-1.88392	0.000135271	0.0161727
100137068	TRPV6	NC_056057.1:107376955-107393522	0	2.50422	-13.9794	0.000137274	0.0163343
101110947	FNDC1	NC_056061.1:83211841-83328100	5.0111	16.9612	-1.6856	0.000141845	0.0167198
101117676	PKHD1L1	NC_056062.1:67783042-67974019	1.05419	3.88353	-1.79865	0.000143099	0.0167474
101107885	TOX2	NC_056066.1:72372805-72528108	0.0165777	0.185522	-3.36116	0.000147004	0.0170871
100141301	GSTA1	NC_056073.1:24772942-24808045	27.8669	0.0655013	8.02925	0.000148007	0.0171245
101114011	LOC101114011	NC_056057.1:107718074-107724575	0	5.76905	-13.8343	0.000156471	0.0180207
101108515	ELOVL7	NC_056069.1:18629708-18711128	10.8506	4.4362	1.462	0.000158472	0.0181678
101102187	PRSS23	NC_056074.1:8273957-8293536	22.2102	83.4165	-1.79092	0.000163662	0.0184263
101103641	AKR1D1	NC_056057.1:103217229-103269171	0.125205	0	11.5269	0.000164974	0.018483
101104497	PRTG	NC_056060.1:52770524-52917182	0.00715267	0.12755	-4.03189	0.000165638	0.018483
101122295	PRKCZ	NC_056065.1:49910473-50010810	0.613953	2.38384	-1.88733	0.000170981	0.0189754
101110481	KIAA2012	NC_056055.1:204391568-204525466	1.41666	0.229555	2.76008	0.000171562	0.0189754
101103840	ADAMTS6	NC_056069.1:14157726-14447677	0.785347	2.42699	-1.90251	0.000174926	0.0192626
101117785	APOA1	NC_056068.1:27224306-27258309	10.9253	36.1598	-1.63727	0.000183004	0.0200641
100500782	VIPR1	NC_056072.1:14653554-14684831	1.80336	0.0856163	4.50403	0.00018589	0.0202919
101115616	COL28A1	NC_056057.1:16187626-16370017	0.222848	2.24298	-3.2924	0.000188875	0.0205285
101104888	MAP3K15	NC_056080.1:17891857-18056983	2.64256	1.02411	1.51836	0.000192333	0.020795
101118907	IP6K3	NC_056073.1:7997023-8021162	0	0.0879977	-9.63177	0.000192983	0.020795
101109585	TSPAN2	NC_056054.1:92403921-92445539	2.05143	6.0446	-1.44437	0.000195401	0.0209655
100141302	KCNK3	NC_056056.1:33838757-33875372	5.3476	1.2429	2.20362	0.000196922	0.0210388
101118961	LY6D	NC_056062.1:14582337-14583984	3.30323	0.116238	4.89689	0.000198919	0.0211621
101112261	DEPDC1B	NC_056069.1:18737332-18837910	1.42878	0.330956	2.30009	0.000199771	0.0211631
101112976	CREB5	NC_056057.1:68869477-69308814	2.05306	5.87549	-1.29702	0.000205117	0.021356
101109847	TPRG1	NC_056054.1:198815075-198975023	0.901832	2.48016	-1.36059	0.000205845	0.021356
101114789	NALF1	NC_056063.1:82179110-82787491	0	0.0117493	-10.8392	0.000212571	0.0217838
101112990	ITGBL1	NC_056063.1:77241715-77469897	8.40056	25.4336	-1.47824	0.000213645	0.0218048
101102702	MID1IP1	NC_056080.1:38318345-38320652	154.144	36.5972	2.3002	0.000214897	0.0218438
101112637	PMEL	NC_056056.1:163559701-163568544	26.3444	0.583902	5.4537	0.000219721	0.0221548
114113623	MUCL1	NC_056056.1:131777817-131781723	0	7.4059	-13.4597	0.000223193	0.0224148
121816658	LOC121816658	NC_056068.1:30816031-30885435	0	0.0705177	-10.8813	0.000225906	0.0225969
101113458	GALNT15	NC_056054.1:274213867-274257196	9.12486	26.3351	-1.39613	0.000231222	0.0229942
101111424	COL6A6	NC_056054.1:272633094-272812347	0.887449	5.13794	-2.48013	0.000231709	0.0229942
101111138	LPAR3	NC_056054.1:61857276-61941446	2.08426	0.192366	3.66484	0.000236199	0.0232855
101108999	FABP1	NC_056056.1:58827701-58833417	0	0.280318	-9.24108	0.00023977	0.0235152
101105506	IQGAP2	NC_056060.1:7641826-7949558	5.4103	15.4068	-1.44123	0.000251565	0.0244808
101114511	AGPAT2	NC_056056.1:2839985-2852203	852.703	223.926	2.13048	0.000266739	0.0258572
101107119	LOC101107119	NC_056066.1:42841301-42858263	280.568	49.6041	2.70277	0.00026821	0.0258891
101119421	CDH18	NC_056069.1:53522953-54134046	0	0.040702	-13.242	0.000269925	0.0258891
101119218	LOC101119218	NC_056060.1:12133984-12149745	15.1521	50.4759	-1.56827	0.000270161	0.0258891
101103535	DUSP4	NC_056079.1:24825444-24839315	19.4214	7.13142	1.59807	0.000271986	0.0259648
101108803	LOC101108803	NC_056054.1:166075960-166369255	9.5909	27.9442	-1.44327	0.000280731	0.0266981
101109861	DCX	NC_056080.1:123600183-123717792	0	0.0359873	-10.6248	0.000287683	0.027256
100192432	FCGR2B	NC_056054.1:113057183-113073971	2.62403	10.2138	-1.98536	0.000295375	0.0278796
101113363	ADGRD1	NC_056070.1:46091359-46267816	4.20081	10.3388	-1.17761	0.000301062	0.0280995
101118806	EYA2	NC_056066.1:75494271-75753569	0.793144	0.226833	1.92368	0.000302713	0.028149
101113980	EFHD1	NC_056054.1:8271919-8316115	10.1333	30.3965	-1.46476	0.000311507	0.0287435
101106012	PDGFRA	NC_056059.1:70439141-70487328	22.7962	61.3528	-1.30235	0.000312175	0.0287435
121816777	LOC121816777	NC_056069.1:39503120-39649001	0.710377	0.211527	1.88586	0.000312542	0.0287435
101104028	LOC101104028	NC_056054.1:181390774-182099252	0.166843	0.549212	-1.61424	0.000315381	0.0288507
101113333	CFAP299	NC_056059.1:95737996-96433016	0	0.032119	-13.086	0.000316005	0.0288507
101113549	RRP12	NC_056075.1:18435271-18464131	3.50962	0.662087	3.02423	0.000322365	0.0293247
101109070	ADGRG2	NC_056080.1:17231098-17362284	0.139643	0.558189	-1.88581	0.000334191	0.0300736
101118781	LRRC17	NC_056057.1:45719526-45761716	3.93495	12.4118	-1.58415	0.00034318	0.0307722
101112716	KRT7	NC_056056.1:134138551-134152159	0	1.56447	-12.9562	0.000355238	0.0316275
101110234	PGPEP1	NC_056058.1:4633842-4671062	25.5611	11.3539	1.31673	0.00036173	0.0320917
101102992	COL9A1	NC_056062.1:3790396-3877943	0	0.0152693	-8.91161	0.000379636	0.033327
114117945	LOC114117945	NC_056067.1:63644414-63663152	0.065602	0	9.00643	0.000384582	0.0335268
101111218	ADAM33	NC_056066.1:51231959-51246603	8.50913	22.6317	-1.29411	0.000391236	0.0339888
101119919	ITGB4	NC_056064.1:55183226-55215554	4.10818	10.6844	-1.27633	0.000400445	0.0346689
100913161	HSD17B2	NC_056067.1:8096021-8195156	0	0.187334	-12.8206	0.000410519	0.0354189
101123082	BOC	NC_056054.1:178880998-178955013	2.51429	7.20427	-1.41795	0.000420885	0.0361889
101112615	CALHM3	NC_056075.1:23749401-23757794	0.00271233	0.321765	-6.65294	0.000424712	0.0363934
106990096	LOC106990096	NC_056065.1:5750385-5864667	25.9021	7.62438	1.91166	0.000435941	0.0372285
101117677	ATP6V0D2	NC_056062.1:89465990-89521222	0.0777783	0	10.6425	0.000439046	0.0373665
101102957	TNFSF15	NC_056055.1:8987040-9008373	1.02279	4.41649	-1.97103	0.000446408	0.0377783
101117223	RNF128	NC_056080.1:128564748-128662922	2.99853	0.665568	2.35232	0.000446893	0.0377783
497271	ANGPT1	NC_056062.1:69925578-70229651	2.98812	12.9326	-1.9744	0.000451042	0.0379714
101107068	UNC5B	NC_056078.1:26588178-26678118	3.29781	1.31529	1.44405	0.000454954	0.0379714
101118266	FGL2	NC_056057.1:45490769-45497317	19.3752	52.2694	-1.31393	0.000455671	0.0379714
443257	IDH1	NC_056055.1:210312166-210332222	299.382	127.062	1.4009	0.000462934	0.0382332
101116784	THBS3	NC_056054.1:105387364-105397475	5.50267	17.3133	-1.54152	0.000471103	0.0386136
100147780	SLC25A33	NC_056065.1:43172903-43204174	18.5684	8.71635	1.24792	0.000472154	0.0386136
101111284	CCDC69	NC_056058.1:60218505-60266709	41.8554	9.30788	2.3901	0.00047481	0.0387047
101106563	GRK7	NC_056054.1:247736226-247777782	0	0.028364	-8.81676	0.000479736	0.0389797
443017	CR2	NC_056065.1:5284060-5347332	2.49442	7.74801	-1.56316	0.000492372	0.0398597
101110089	RAB3C	NC_056069.1:20634185-20932905	0.0753427	0.399961	-2.22809	0.000493806	0.0398597
101111767	CTBS	NC_056054.1:61601200-61613882	10.3081	0.819116	3.86886	0.00050358	0.0400107
105614373	LOC105614373	NC_056067.1:49834451-49851493	8.1426	0.555106	4.05376	0.00050563	0.0400468
101123289	LOC101123289	NC_056057.1:67136545-67140914	14.2268	1.11044	3.88105	0.00051405	0.0404841
101116418	PTGIS	NC_056066.1:77585123-77649211	4.14874	10.2392	-1.19672	0.000515988	0.0404841
101106188	KIF19	NC_056064.1:56357793-56385396	0	0.0395147	-8.70561	0.000518942	0.0405459
121818205	LOC121818205	NC_056080.1:4432053-4439412	0	2.14788	-12.588	0.000526385	0.0407542
101104332	BPI	NC_056066.1:67160503-67191517	0.149303	1.17298	-2.85357	0.000527294	0.0407542
101115862	NUP62CL	NC_056080.1:128054849-128162469	0.361353	1.44699	-1.93884	0.000527546	0.0407542
101106297	CPN2	NC_056054.1:194001738-194010772	13.2381	1.57754	3.28954	0.000539769	0.0410367
101102483	ISOC1	NC_056058.1:22749833-22770794	35.7279	15.1206	1.41422	0.000540752	0.0410367
443045	ICAM1	NC_056058.1:12670619-12681109	17.7658	44.8106	-1.21224	0.00054101	0.0410367
101114544	GSS	NC_056066.1:64224970-64249601	13.2116	4.10954	1.90506	0.000556063	0.0420514
101110905	ACSL1	NC_056079.1:14371441-14437206	776.709	192.469	2.2343	0.000562508	0.0422841
101116799	LOC101116799	NC_056080.1:4315395-4322267	0	2.15298	-12.4891	0.000586643	0.0435765
101113683	LOC101113683	NC_056061.1:63189581-63203583	0.74424	3.78108	-2.23431	0.000590722	0.0436814
101121706	LOC101121706	NC_056068.1:46991136-47017036	0.324502	0	8.62981	0.000622027	0.0455313
101116618	CXADR	NC_056054.1:140257443-140322127	9.46821	3.30692	1.80975	0.000639914	0.0461704
114110152	LOC114110152	NC_056074.1:2016679-2248952	0.251184	0.878643	-1.69419	0.000639953	0.0461704
114113041	RPRM	NC_056055.1:156129228-156130668	0.793196	9.47962	-3.48095	0.000649818	0.0466142
101102413	LOC101102413	NC_056067.1:38558574-38565007	16.2045	129.186	-3.00099	0.000657386	0.0469363
101122576	CCDC141	NC_056055.1:131045075-131277910	0.705502	1.76401	-1.18702	0.000658047	0.0469363
101112608	RAB3B	NC_056054.1:26358392-26430780	12.8459	3.17206	2.07072	0.000665557	0.0473375
101122616	TRIB3	NC_056066.1:60298959-60310436	4.41673	1.08298	2.21791	0.00067894	0.0480173
101102720	DGKB	NC_056057.1:23336844-24220191	0.0858773	0.307333	-1.73513	0.000684697	0.0482885
101120576	COL25A1	NC_056059.1:16363618-16859020	0.18073	0.590007	-1.66067	0.000693415	0.0487663
101107516	LOC101107516	NC_056056.1:209168425-209178331	3.73328	0.620909	2.63968	0.000705384	0.0493317
101111297	MEDAG	NC_056063.1:30292645-30308359	28.3163	82.472	-1.39759	0.000710743	0.0495203
101107229	TKT	NC_056072.1:47803609-47826742	414.014	113.498	2.09192	0.000712025	0.0495203
101118540	SLC47A2	NC_056064.1:33654531-33673677	0.0674193	0	9.07163	0.00072137	0.0500316
101122246	LOC101122246	NC_056077.1:35963576-35967506	10.2236	1.41658	3.01157	0.000729779	0.0504754
101109848	RNF165	NC_056076.1:46439461-46553093	0.01078	0.127802	-3.36666	0.000739609	0.0510148
101113859	CCN3	NC_056062.1:57923518-57931984	65.1344	230.313	-1.72024	0.000743573	0.0511477
101112190	ABHD11	NC_056077.1:33994825-33997259	57.104	16.6468	1.97404	0.000750198	0.0514623
443393	ALB	NC_056059.1:89222082-89239968	28.2716	0.899711	5.21006	0.000752253	0.0514627
101115439	NXPH2	NC_056055.1:171813034-171941729	0.0449127	0.954293	-4.21764	0.000756948	0.0516432
101104256	RTN4RL1	NC_056064.1:22865995-22942531	0.770432	2.53946	-1.63274	0.0007635	0.051899
101104796	SLC18A2	NC_056075.1:37101447-37142745	0.110529	0.779201	-2.72365	0.00081441	0.0543813
101101957	LOC101101957	NC_056080.1:130916329-130974603	0.0451813	0	9.99958	0.000820499	0.0546426
101110495	KRT8	NC_056056.1:133512119-133519637	1.08504	9.49937	-3.09212	0.000851599	0.0562661
101103717	PTPRZ1	NC_056057.1:87913611-88112774	0.670318	0.091604	2.61163	0.000857095	0.0564805
101106006	TGFBI	NC_056058.1:45095177-45128206	16.2468	43.4503	-1.34414	0.000886661	0.0582759
101116672	MAG	NC_056067.1:45289258-45305377	0	0.0659057	-8.5177	0.000899278	0.0589509
101115925	IGF2BP2	NC_056054.1:202185501-202349278	0.214491	1.20805	-1.85601	0.00090614	0.0592125
101102315	SLC35F1	NC_056061.1:19834992-20238454	0.134298	0.581953	-2.0404	0.000910345	0.0592125
101113975	LOC101113975	NC_056054.1:110292932-110325996	0.02473	0	8.41065	0.000924887	0.0593207
101123239	CHRNA3	NC_056071.1:28788990-28806774	0	0.0597937	-8.67286	0.00092616	0.0593207
114110441	LOC114110441	NC_056076.1:33463418-33547997	42.1411	17.5626	1.41585	0.000926916	0.0593207
101122928	EPHB2	NC_056055.1:243636304-243852118	0.40005	1.21083	-1.48664	0.000928547	0.0593207
101114766	RRP7A	NC_056056.1:219361436-219369411	3.40774	0.377355	3.23982	0.000952443	0.0606929
101116988	PITX2	NC_056059.1:15192260-15212049	0	0.254786	-8.79288	0.000957404	0.0607288
101114783	HTR1E	NC_056061.1:50229737-50324998	0.0336387	0	10.2207	0.000957845	0.0607288
101112980	TSPAN5	NC_056059.1:26503470-26690675	0.776949	1.94929	-1.23223	0.000964457	0.0607684
101103695	EPHA6	NC_056054.1:161982528-162958772	0.560644	0.187603	1.70864	0.000964718	0.0607684
101113208	MYT1L	NC_056055.1:895501-1299203	0	0.006747	-9.97273	0.000965731	0.0607684
100125614	ROBO2	NC_056054.1:145246428-145915482	0.204323	1.06383	-1.9286	0.000974425	0.0610097
101103732	UST	NC_056061.1:73118044-73432374	2.81557	7.47827	-1.33713	0.000985944	0.0615773
101116500	LOC101116500	NC_056066.1:62680023-62701303	0	0.198641	-10.4697	0.000996411	0.0617871
101122168	DGAT2L6	NC_056080.1:63071735-63093115	0	0.044785	-8.53557	0.00102385	0.0630041
101117848	FLRT2	NC_056060.1:95334749-95341461	6.65657	19.0933	-1.40809	0.00105188	0.0645709
101111925	ACAA2	NC_056076.1:49746617-49779436	319.298	162.155	1.0953	0.00109378	0.0666542
101120623	NPC1	NC_056076.1:33411683-33455453	80.7501	32.3756	1.49597	0.00111429	0.0675758
678680	LGMN	NC_056071.1:55197096-55234357	48.0746	24.0489	1.10944	0.00112367	0.0676502
101120382	PSAT1	NC_056055.1:58587858-58615763	7.50789	2.03119	2.05519	0.00112899	0.0676502
101113519	TPPP3	NC_056067.1:34565350-34569002	30.8473	96.8728	-1.59088	0.00115079	0.068629
101111235	MBOAT1	NC_056073.1:36985599-37100132	3.11704	7.92298	-1.2826	0.00115373	0.0686415
101114662	EPHB1	NC_056054.1:254738321-255195394	0.427107	1.08037	-1.18557	0.00118556	0.0699437
101120003	UTS2	NC_056065.1:44863105-44892777	0.281811	0	11.724	0.00119572	0.0703002
101118780	SLC25A13	NC_056057.1:14232788-14463568	6.95466	2.85117	1.4752	0.00122827	0.0714769
101104621	FAM53B	NC_056075.1:43725762-43839243	36.7615	19.021	1.10264	0.00122986	0.0714769
101118337	TNC	NC_056055.1:8661624-8762845	5.4633	1.19877	2.22303	0.0012398	0.0718882
101122406	MUC20	NC_056054.1:191308436-191324124	3.45864	0.569374	2.76933	0.00124745	0.0721654
101120358	SLC25A1	NC_056070.1:72649008-72651785	149.983	49.131	1.8189	0.00125835	0.0725683
114116078	LOC114116078	NC_056061.1:74479192-74775207	1.12292	10.545	-3.31535	0.00126309	0.0725683
114115358	LOC114115358	NC_056054.1:23581773-24515480	0	0.00999633	-11.7912	0.00126991	0.0727797
101105654	CTXN3	NC_056058.1:24041367-24052229	0	0.40465	-10.3763	0.00127524	0.0727797
101111907	DNAJC21	NC_056069.1:39362093-39387967	33.5737	14.5655	1.39131	0.00127766	0.0727797
114115413	EXOC1L	NC_056059.1:71957408-71977229	20.5853	3.69032	2.14303	0.00129219	0.0733023
101113583	LOC101113583	NC_056057.1:10218526-10234978	30.963	11.5239	1.62525	0.00129338	0.0733023
101120391	TFPI	NC_056055.1:121882150-121970317	1.29798	0.470274	1.55286	0.00130943	0.0738874
101121592	LGR5	NC_056056.1:107555955-107687767	0.053053	0.305188	-2.40981	0.00130969	0.0738874
101113097	DSCAML1	NC_056068.1:27825117-28189218	0.0100423	0	9.80824	0.00131662	0.0739514
100579169	GSN	NC_056055.1:2222036-2283902	847.658	2083.77	-1.22907	0.00133051	0.074319
101116409	LOC101116409	NC_056061.1:53048311-53052603	0	2.07513	-11.7604	0.00133085	0.074319
101103280	TIAM1	NC_056054.1:124643709-125105636	0.872229	3.09764	-1.73282	0.00133204	0.074319
101104482	LOC101104482	NC_056056.1:206336144-206392238	0.325193	0.0140417	4.6454	0.00134253	0.0747379
100302355	SFRP2	NC_056070.1:4065075-4072507	13.9977	3.02632	2.30772	0.00136613	0.0758835
101104952	PCOLCE2	NC_056054.1:246761534-246845863	43.2324	132.85	-1.44651	0.0013706	0.0759641
443184	AQP9	NC_056060.1:50224583-50275712	0	0.0466303	-9.79052	0.0013841	0.0763749
101118760	TMEFF2	NC_056055.1:194282218-194566560	0.618775	0.106277	2.57248	0.00138727	0.0763819
101123636	DAAM1	NC_056060.1:69529989-69713960	10.2747	23.2536	-1.05605	0.00139914	0.0765318
101122331	HDX	NC_056080.1:75381868-75623410	0.034511	0	11.5826	0.00141691	0.0772333
101120554	XK	NC_056080.1:37028663-37080002	3.49577	1.38874	1.5066	0.00141811	0.0772333
101103958	LOC101103958	NC_056061.1:74455356-74528713	0.16805	2.40831	-4.37555	0.00143114	0.0774696
100913164	EHF	NC_056068.1:63998618-64041973	0.703329	4.23504	-2.41154	0.00143208	0.0774696
101121404	SHOC1	NC_056055.1:11754208-11844796	0	0.0258447	-9.82051	0.00143479	0.0774696
101112384	LOC101112384	NC_056056.1:218936771-219012528	9.23534	2.57434	2.04212	0.00144839	0.0777973
101104402	SLC2A9	NC_056059.1:105669967-105883438	0.109594	0	11.5579	0.00144993	0.0777973
101106820	MPZ	NC_056054.1:112724768-112729926	0.699581	8.92446	-3.65567	0.00146489	0.07842
101110535	DGAT2	NC_056068.1:53943498-53976554	508.057	109.801	2.43076	0.00146836	0.0784387
101109144	SLC25A36	NC_056054.1:248587768-248621891	143.217	49.0667	1.7572	0.00153073	0.0812518
101107561	ABCA4	NC_056054.1:71113010-71247443	0.250254	0.869692	-1.63515	0.00154358	0.0817609
101109367	TP53INP1	NC_056062.1:82324369-82340386	46.5661	20.0109	1.22676	0.00154761	0.0818016
101118436	FAM234B	NC_056056.1:202455154-202494570	0.818034	2.65295	-1.61263	0.00155472	0.0820048
101102437	TGFBR3	NC_056054.1:68958605-69158652	23.6861	56.3026	-1.16146	0.00157476	0.0823943
100049064	HBB	NC_056068.1:48036944-48038412	386.377	24.7023	3.94453	0.00157689	0.0823943
101110137	VAV2	NC_056056.1:2186976-2364531	3.65067	8.21098	-1.02456	0.00157849	0.0823943
101107789	PRDM8	NC_056059.1:95533924-95605540	1.67131	4.23487	-1.46305	0.00157932	0.0823943
101113319	KRT80	NC_056056.1:134195571-134218816	0	0.035238	-8.27484	0.00158125	0.0823943
101116322	DACT2	NC_056061.1:90228708-90239198	0.759492	4.23127	-2.30351	0.00158179	0.0823943
101105582	ACSF2	NC_056064.1:35973808-36005817	72.69	35.0454	1.20875	0.00159159	0.0825867
101105400	LOC101105400	NC_056056.1:162884906-162906746	3.24602	10.6081	-1.52724	0.00159206	0.0825867
101113168	LOC101113168	NC_056067.1:44563501-44565684	0.0207777	1.52418	-5.91032	0.00159759	0.0827025
101112653	IL20RA	NC_056061.1:62262512-62296265	1.12416	0.0525593	4.54678	0.00160916	0.0831298
101109764	RADIL	NC_056077.1:39483659-39604852	2.24561	5.39006	-1.16427	0.00161267	0.0831405
101121072	PLP1	NC_056080.1:129377544-129394033	0.123703	1.62202	-3.63339	0.00161994	0.083344
101106096	NET1	NC_056066.1:42722491-42758183	35.1628	79.1161	-1.03863	0.00162412	0.0833879
101114889	PROKR2	NC_056066.1:47178121-47190400	0.017503	0.424932	-4.31146	0.00165115	0.0846029
101106552	BEND6	NC_056073.1:3344345-3404841	2.03673	0.754097	1.56543	0.00166941	0.0851785
101121716	SEMA3B	NC_056072.1:50138182-50149232	7.31406	19.9133	-1.34003	0.00167724	0.0851785
101116544	LOC101116544	NC_056055.1:242073678-242125256	0.133236	0.991775	-2.78973	0.00167935	0.0851785
101105458	RBP4	NC_056075.1:14677595-14692459	214.438	584.915	-1.34878	0.00169681	0.0858908
101115226	LOC101115226	NC_056068.1:24888319-24924098	0.00229267	0.157376	-5.82652	0.00170709	0.086237
101123531	SCN1A	NC_056055.1:143441362-143596860	2.51343	6.28188	-1.17803	0.00172807	0.0869471
101113871	SLC23A2	NC_056066.1:46813534-46951715	10.8582	5.6388	1.10191	0.00175186	0.0877923
100147799	CCND2	NC_056056.1:211598275-211621095	15.8604	39.289	-1.23133	0.00175995	0.0880048
101113077	LOC101113077	NC_056062.1:57727520-57732405	0.123982	3.87582	-4.92428	0.00176609	0.0880048
101108742	GRM8	NC_056057.1:92332518-93226109	0.529061	0.00727567	6.16026	0.0018147	0.0898654
114117340	LOC114117340	NC_056065.1:5655020-5719653	2.22241	0.622653	1.99165	0.00184557	0.0910349
780504	KIT	NC_056059.1:70865451-70947770	2.65169	8.19297	-1.53848	0.00185521	0.0913307
101118808	CNTNAP4	NC_056067.1:2897397-3185377	0.095498	0.313138	-1.63127	0.00187748	0.0922465
101116661	LOC101116661	NC_056061.1:53127728-53129236	0	2.32504	-10.4186	0.00189364	0.0924782
114116085	LOC114116085	NC_056061.1:74157384-74201070	2.68961	22.0342	-2.93676	0.00189693	0.0924782
101113002	KCTD19	NC_056067.1:34477862-34504852	0.0507603	0.487644	-3.10074	0.00190864	0.0928688
101107779	SLC48A1	NC_056056.1:138800498-138809122	48.0348	20.547	1.40999	0.00194353	0.0942013
101106896	ELOVL3	NC_056075.1:22640679-22643791	4.73067	0.195656	4.82823	0.00194976	0.0943211
443323	FST	NC_056069.1:25757523-25764025	4.75817	17.2916	-1.72307	0.00195696	0.0944871
101114051	THYN1	NC_056068.1:82088952-82109023	42.9619	18.1833	1.41542	0.00196877	0.0948752
101119448	SERINC2	NC_056055.1:235982139-235997618	30.7612	10.4239	1.7495	0.0019805	0.0951794
101111972	DUOX1	NC_056060.1:63383470-63417630	0	0.0271507	-8.49226	0.00199549	0.0956121
101105194	DNAH8	NC_056073.1:12592008-12906540	0.10861	0.585541	-2.30612	0.00200651	0.0959572
101119821	PPM1K	NC_056059.1:37115160-37139254	118.567	41.5486	1.71504	0.0020175	0.0961597
101122270	AMPH	NC_056057.1:83976545-84191586	0.900322	0.240973	1.92572	0.00206304	0.0975672
114116901	LOC114116901	NC_056064.1:19016112-19046647	0	0.0645487	-9.5329	0.00207105	0.0976425
101119095	AFAP1L2	NC_056075.1:34301218-34455397	2.49823	5.94784	-1.1287	0.00207676	0.0976425
101123346	CTNNA3	NC_056078.1:21570751-23431511	0.109224	0.342307	-1.50294	0.00210433	0.0987541
780470	CTSB	NC_056055.1:105585683-105606598	300.647	148.879	1.13449	0.002119	0.0989656
101113744	SCN8A	NC_056056.1:134502440-134702533	0.34403	1.39431	-1.95944	0.00214632	0.0999772
101108737	DNM1	NC_056056.1:8029526-8075667	2.54464	7.51297	-1.45008	0.00216722	0.100228
101119850	ACADS	NC_056070.1:63102183-63122291	102.926	41.963	1.48712	0.00216766	0.100228
101108117	KRT18	NC_056056.1:133471144-133474717	0.337275	3.29658	-3.13004	0.00225295	0.102619
101106714	ETFDH	NC_056070.1:40525605-40565257	40.9553	20.3765	1.16286	0.00226002	0.102619
101111626	CROT	NC_056057.1:34416632-34482688	13.8494	30.8394	-1.05147	0.00226435	0.102619
101122698	RGS6	NC_056060.1:81547224-82156014	1.76952	4.15278	-1.23019	0.00227053	0.102714
100302304	ARF4	NC_056072.1:43710244-43727720	331.515	158.742	1.23578	0.00229214	0.103505
101109717	LOC101109717	NC_056063.1:27290054-27343185	0.032702	0	9.39383	0.00234723	0.105604
101116059	SNAP91	NC_056061.1:10751422-10925749	0.00318567	0.116037	-5.2108	0.00240694	0.107752
100217407	TIMP3	NC_056056.1:176991534-177046342	78.8957	170.879	-0.992033	0.002409	0.107752
101121604	TACR3	NC_056059.1:21712367-21793451	0.0255563	0	9.6	0.00241194	0.107752
101113789	ACAD8	NC_056068.1:82093418-82109027	56.5472	22.6903	1.49964	0.00243266	0.108484
101120341	LOC101120341	NC_056064.1:16681913-16977277	0	0.0209157	-11.1416	0.00244208	0.108711
101120135	HACD2	NC_056054.1:188724639-188816813	124.87	55.3835	1.35714	0.00247622	0.109842
101107802	INCA1	NC_056064.1:26268153-26296253	10.0564	4.43829	1.35209	0.00248068	0.109845
101109436	DENND5B	NC_056056.1:183898284-184123129	8.11254	5.16128	1.05879	0.00250342	0.110657
101111412	SLC15A2	NC_056054.1:187200109-187242730	3.51788	0.341583	3.54519	0.00252339	0.111344
101114861	LOC101114861	NC_056057.1:41761849-41816740	0.926637	0.0771163	3.67891	0.00253963	0.111671
101102228	CRHR2	NC_056057.1:67184036-67228815	3.93256	0.464018	3.16679	0.00253969	0.111671
101119408	TRAF5	NC_056065.1:71479036-71524875	1.11001	3.59696	-1.537	0.00260316	0.113969
101105648	CRAT	NC_056056.1:7349409-7362278	61.0076	25.1184	1.46447	0.00260656	0.113969
101111623	AFF3	NC_056056.1:101191907-101816375	1.30003	2.94411	-1.07958	0.00261	0.113969
101102768	DAB1	NC_056054.1:31606620-32077930	0.574678	0.105883	2.36543	0.00261011	0.113969
101114529	MPC1	NC_056061.1:89070345-89083376	69.8369	33.792	1.73267	0.00264387	0.115122
101120267	LTBP4	NC_056067.1:49308907-49335912	53.1473	113.569	-0.96957	0.00264569	0.115122
101114232	STARD6	NC_056076.1:54059156-54079531	0	0.035078	-8.06446	0.00268962	0.116629
101116015	NTRK2	NC_056055.1:34664129-35064644	35.9584	83.6389	-1.12307	0.00270042	0.116896
101104025	SYCP1	NC_056054.1:92227825-92364590	0.0390723	0.239315	-2.41831	0.00271426	0.117293
101106340	DCLK1	NC_056063.1:25634739-25984814	7.25297	16.9403	-0.979269	0.00272888	0.117722
101109714	ESRP1	NC_056062.1:82532337-82592308	0	0.091257	-11.0536	0.00275133	0.118486
101117601	RNF157	NC_056064.1:54806099-54886334	8.75905	4.08195	1.23709	0.00276487	0.118866
101112874	FCRL3	NC_056054.1:108031635-108079933	0.027604	0.350072	-3.46248	0.00278502	0.119527
101118685	GYS2	NC_056056.1:194179177-194237178	0.975272	0.0340757	4.91272	0.00280205	0.119849
654404	ACLY	NC_056064.1:41787714-41830034	62.9564	24.5765	1.57846	0.00280742	0.119874
101121732	ASAH2	NC_056075.1:8350760-8425562	0.416548	0.050837	3.26374	0.00283066	0.120661
442993	UGT1A9	NC_056054.1:7254899-7426072	1.46435	6.04641	-1.85305	0.00284565	0.121094
443122	STAR	NC_056079.1:32408293-32414311	7.43487	1.0019	2.88458	0.00285433	0.121258
101101926	VOPP1	NC_056072.1:496514-664321	1.92511	4.64952	-1.19378	0.0028711	0.121765
100037703	KIF5B	NC_056066.1:32695378-32742379	193.279	89.7425	1.27829	0.00287916	0.1219
101119182	PCP4	NC_056054.1:260670721-260738990	0	0.0771923	-11.0048	0.00289915	0.122196
101114328	BAIAP2L1	NC_056077.1:38091546-38168291	24.4964	11.6937	1.22157	0.00290351	0.122196
121816180	LOC121816180	NC_056066.1:53057503-53076404	0	0.0324367	-7.89489	0.00290725	0.122196
101106545	NEURL1B	NC_056069.1:4577644-4618702	3.97604	9.02364	-1.07114	0.00292374	0.122344
101112328	CNBD1	NC_056062.1:88231038-88725652	0.015213	0	10.852	0.00296082	0.123674
114108656	LOC114108656	NC_056066.1:42931162-42946584	0	0.681774	-10.9719	0.00296538	0.123674
114111248	LOC114111248	NC_056080.1:132839489-132840305	6.99017	0.454806	4.14366	0.00301539	0.125163
114111413	LOC114111413	NC_056080.1:11757233-11776762	0.587818	0.0133633	5.48023	0.00301603	0.125163
101113743	PLEKHG7	NC_056056.1:129075938-129158031	0	0.00682767	-7.76084	0.00302391	0.125243
101113322	LRRN3	NC_056057.1:58800339-58840230	1.13096	0.139594	3.27035	0.00308914	0.127355
101103155	STK32B	NC_056059.1:104404674-104788232	0	0.0137363	-10.9125	0.00310414	0.127455
101118014	CCDC146	NC_056057.1:45402750-45545262	0.431471	1.31816	-1.33098	0.00311873	0.127541
100302636	KLF4	NC_056055.1:15685597-15689482	9.86079	28.7446	-1.50357	0.00313404	0.12759
101119157	MMP12	NC_056068.1:5474811-5484513	1.37214	0.0327193	5.33119	0.00314058	0.12759
101119169	LOC101119169	NC_056073.1:46991202-47034915	0.124157	0.856601	-2.57251	0.00315026	0.127777
101119976	LOC101119976	NC_056056.1:203979632-204067953	1.95534	0.610368	1.85913	0.0031658	0.127938
105605871	LOC105605871	NC_056079.1:34054416-34181742	0	0.0128083	-9.28549	0.00316954	0.127938
101117763	LOC101117763	NC_056059.1:15270073-15350714	9.156	2.78581	1.91696	0.00319178	0.128629
101118510	LOC101118510	NC_056055.1:38184024-38201391	0	0.042162	-8.12263	0.00331727	0.132461
105603272	ANKRD9	NC_056071.1:64886591-64889557	20.8209	6.66453	1.81946	0.00331852	0.132461
100500781	VIPR2	NC_056057.1:121224353-121290755	2.01741	0.346267	2.58048	0.00333596	0.13253
443409	HSD11B1	NC_056065.1:73023447-73086378	22.8392	10.0029	1.25321	0.00336981	0.133447
101109311	DPYD	NC_056054.1:74251622-75182078	64.4871	33.2459	1.12942	0.00337922	0.13361
101113847	SHC2	NC_056058.1:40784002-40811735	7.09336	3.1334	1.3034	0.00340368	0.134225
101113459	SVEP1	NC_056055.1:12788761-12991896	17.0602	41.9534	-1.13071	0.00340547	0.134225
101120753	SLC8A3	NC_056060.1:79866487-80028292	0.0897037	0.433642	-2.08831	0.00342874	0.134713
101111288	CA12	NC_056060.1:44842836-44907905	31.0892	5.934	2.61133	0.00343396	0.134713
XLOC_081395	XLOC_081395	NC_056065.1:63453061-63476029	0.66933	0.010756	6.04543	0.00351231	0.136931
101110549	PLPPR4	NC_056054.1:76665927-76718670	0	0.0292233	-9.18612	0.0035446	0.137878
100885767	GYPC	NC_056055.1:192578868-192625435	88.2992	44.7473	1.15464	0.00354759	0.137878
101112387	OLFML2A	NC_056056.1:11083422-11112144	2.81054	6.59341	-1.10985	0.00355358	0.137898
443090	GPD2	NC_056055.1:153049411-153286484	14.7312	8.81752	0.927589	0.00356072	0.137961
101104264	C14H16orf95	NC_056067.1:12254830-12458492	0.334742	2.14324	-2.30783	0.00357752	0.138399
101108592	LOC101108592	NC_056066.1:44699054-44751444	9.36093	23.8012	-1.28976	0.00359959	0.138867
101105524	SLC43A3	NC_056068.1:79489112-79518898	27.899	15.1486	1.03047	0.00360622	0.138867
101104887	ABCA12	NC_056055.1:216967416-217172406	0.163227	0	9.18411	0.0036863	0.141517
101108271	SETBP1	NC_056076.1:44714338-45124267	5.14061	9.61113	-0.990611	0.00374193	0.143427
101117395	LOC101117395	NC_056055.1:157022756-157023308	234.655	521.469	-1.03259	0.00377181	0.143821
101104856	P4HA3	NC_056068.1:52287898-52389512	2.71851	0.914589	1.95543	0.00377245	0.143821
101107828	ALDH5A1	NC_056073.1:32235582-32267799	21.4439	10.152	1.33847	0.0037819	0.143867
101110414	CDS1	NC_056059.1:100098187-100175175	6.84437	3.11351	1.31115	0.00381221	0.144801
101120726	SLITRK4	NC_056080.1:92059394-92072386	0.004127	0.265969	-5.56282	0.00389242	0.147437
101117805	SHANK2	NC_056074.1:43956383-44512310	0	0.00350433	-9.15783	0.00390059	0.147437
101106407	CNKSR2	NC_056080.1:19700960-19987451	0.455894	1.17129	-1.26556	0.00390172	0.147437
101113819	LOC101113819	NC_056077.1:19613425-19872176	0.004925	0	9.14347	0.00390511	0.147437
101114933	SCARA5	NC_056055.1:102260368-102393787	46.7315	101.881	-1.00723	0.00394822	0.148313
101123470	UNC13C	NC_056060.1:53791928-54498557	0.0393723	0.17471	-1.96235	0.00395194	0.148313
101121655	LOC101121655	NC_056077.1:36416562-36419452	48.2345	19.9223	1.43776	0.00403247	0.150884
101118504	ARHGAP6	NC_056080.1:9274589-9817706	4.55117	11.0142	-1.18616	0.00408901	0.152772
101122701	GRIK2	NC_056061.1:35144232-35877089	0.205955	0.0146743	3.93605	0.00409781	0.152873
101111065	MASP1	NC_056054.1:200802630-200867328	14.6059	4.94657	1.77165	0.0041343	0.153742
XLOC_119224	XLOC_119224	NC_056075.1:407141-444362	0	0.11815	-10.6515	0.00414176	0.153742
101123526	RRP1	NC_056054.1:264546745-264560958	7.37829	2.62951	1.55169	0.00415399	0.153742
101103814	OCIAD2	NC_056059.1:68201262-68213862	11.3698	36.6784	-1.66121	0.00415519	0.153742
101113636	LOC101113636	NC_056054.1:78026684-78048307	4.09291	13.1119	-1.58099	0.00415903	0.153742
101107744	FAT3	NC_056074.1:1582693-1757568	0.137573	0.488115	-1.70339	0.00416397	0.153742
114113798	LOC114113798	NC_056056.1:208811991-208822095	0	0.0757587	-8.20113	0.00417863	0.153787
101115672	DOP1B	NC_056054.1:269076242-269206416	2.27392	4.80147	-0.953983	0.00418671	0.153787
101117011	TDRD12	NC_056067.1:42692533-42767131	1.86579	4.76739	-1.40676	0.00419119	0.153787
114110822	LOC114110822	NC_056054.1:232156805-232159213	0.248085	3.36287	-3.57134	0.00419275	0.153787
101118419	FRZB	NC_056055.1:126892993-126926153	17.09	4.74917	2.05946	0.0041958	0.153787
114118764	NKD2	NC_056069.1:71357167-71375220	79.4856	24.4041	1.86612	0.00421263	0.154119
101103585	PLCB1	NC_056066.1:747720-1604993	3.80745	8.17598	-0.965828	0.00422698	0.154119
101104753	ANKRD31	NC_056060.1:6547074-6679893	1.23169	0.185966	2.23015	0.00426432	0.155121
114110785	SLC35F3	NC_056078.1:6408905-6541351	0.009747	0	8.99501	0.00428164	0.155346
101104704	UPK1B	NC_056054.1:184855084-184886235	1.13276	0.161031	2.87179	0.00432425	0.156323
443140	ITGA5	NC_056056.1:132147347-132168204	7.22683	18.3591	-1.26129	0.00432727	0.156323
101104295	ARHGEF10	NC_056079.1:1460476-1522569	6.01004	13.072	-1.02383	0.00437734	0.157791
101105162	ITGA11	NC_056060.1:15089858-15225492	3.1534	8.56682	-1.39322	0.00438046	0.157791
101104277	MRPS25	NC_056072.1:57131124-57189288	15.1484	7.21496	1.1968	0.00439961	0.15806
101111182	POLR3H	NC_056056.1:218441109-218452403	19.2146	8.08333	1.45799	0.00440051	0.15806
114114861	SNCB	NC_056058.1:35804873-35822527	1.93169	0.097944	5.27687	0.00441409	0.158095
101114256	ACTG2	NC_056056.1:95717366-95741460	1.11278	3.59671	-1.6426	0.0044734	0.159536
106990363	LOC106990363	NC_056054.1:228416292-228482212	0.051129	0	10.4814	0.0045212	0.160557
101103094	DCLK2	NC_056070.1:7725320-7914855	1.65383	3.17605	-1.01544	0.00455855	0.161655
101120570	GFPT2	NC_056058.1:661383-781358	9.85235	28.2143	-1.36377	0.0046066	0.162898
443218	FOS	NC_056060.1:84571490-84574889	3.9821	18.8044	-2.20976	0.00461676	0.163028
101102052	MFAP5	NC_056056.1:206817679-206829449	51.7423	119.45	-1.0776	0.00462895	0.163229
101102749	PAX1	NC_056066.1:40463534-40476149	0.00498167	0.155503	-4.83153	0.00465766	0.164011
101116326	C1QTNF9	NC_056063.1:34532043-34539745	3.8225	0.823146	2.27456	0.00470175	0.165332
443408	LPL	NC_056055.1:45917232-45942109	398.252	149.839	1.62487	0.00474782	0.166697
101102139	FAM83F	NC_056056.1:217174086-217210628	0	0.041478	-9.20644	0.00476224	0.166758
101120054	XPNPEP2	NC_056080.1:113678220-113705072	19.4188	9.76323	1.16761	0.00481467	0.167579
101116157	LOC101116157	NC_056064.1:26786573-26790122	35.1334	104.146	-1.50496	0.00481808	0.167579
101118655	DSG2	NC_056076.1:25942401-25993705	0.042491	0.332848	-2.93689	0.00481907	0.167579
101107015	TMEM196	NC_056057.1:29385801-29643211	1.04165	0.176183	3.45003	0.00496521	0.172423
101110878	ISLR	NC_056071.1:32166790-32169937	15.861	43.0821	-1.35338	0.0049804	0.172711
101103753	ADM	NC_056068.1:42084616-42089259	209.921	115.133	0.981854	0.00498997	0.172804
100302348	PMP22	NC_056064.1:32522614-32550944	25.6981	58.4154	-1.09504	0.00502526	0.173055
101115635	RHBDL3	NC_056064.1:17579999-17633017	0.026271	0.220652	-2.9583	0.00503	0.173055
121820615	LOC121820615	NC_056054.1:107521234-107563630	0.0357127	1.28774	-4.50582	0.00503167	0.173055
101112561	AOC1	NC_056057.1:115062914-115079819	11.0593	30.0122	-1.35628	0.00506073	0.173816
114110633	LOC114110633	NC_056077.1:2990487-3010284	6.48076	17.0396	-1.29403	0.00507895	0.174204
100820755	SLC7A11	NC_056070.1:19472110-19828555	0.464988	0.16428	1.63788	0.00509709	0.174529
101110370	TRERF1	NC_056073.1:15970722-16182898	0.711616	1.69487	-1.09976	0.00510929	0.174529
XLOC_102321	XLOC_102321	NC_056070.1:27092915-27104658	0.102914	1.05169	-3.27609	0.00518288	0.176563
101118494	COL6A5	NC_056054.1:272854789-273021325	3.03498	0.0616603	5.51447	0.00529519	0.179657
101118148	ATP1A2	NC_056054.1:111157276-111182391	0.0525983	0.443352	-2.95362	0.00535425	0.181331
101107091	KLHL3	NC_056058.1:46703698-46834174	0.93688	2.29057	-1.20317	0.005361	0.181331
100174987	KCNQ5	NC_056062.1:498683-1130834	0.0996193	0.281431	-1.40703	0.00536618	0.181331
101112853	ALAS1	NC_056072.1:48760844-48774853	58.6011	27.5961	1.26627	0.00538541	0.181736
101119519	TDRKH	NC_056054.1:101699514-101722054	5.47152	1.96063	1.66975	0.00540373	0.182109
101103564	NHP2	NC_056058.1:36949645-36953555	38.812	17.4785	1.3287	0.00543572	0.182942
101119992	LOC101119992	NC_056061.1:14947698-15353798	0.149875	1.66031	-1.81213	0.00544784	0.183104
101106492	LOC101106492	NC_056055.1:147583737-147664468	58.3268	30.5849	1.02365	0.00545742	0.183181
105601930	DMBT1	NC_056075.1:41915875-41999964	0.767181	0.0719427	3.12474	0.00547223	0.183433
101121482	ZNHIT1	NC_056077.1:35899399-35924608	44.9586	8.42224	1.23045	0.00549556	0.183969
114113763	LOC114113763	NC_056056.1:208096361-208155567	0	0.0263587	-9.08493	0.00550956	0.184192
101104893	LOC101104893	NC_056056.1:180179065-180290662	1.03311	0.266371	2.23887	0.00561436	0.186949
101110770	RAD54B	NC_056062.1:82772834-82885677	7.12226	3.39867	1.19885	0.00568804	0.189152
101108107	STMN4	NC_056055.1:38555426-38579047	0	0.0277987	-7.89707	0.00571779	0.189639
101108663	LOC101108663	NC_056062.1:80895802-80900503	168.011	80.0302	1.2536	0.00575022	0.190463
101106867	BPIFB6	NC_056066.1:61992888-62008457	0	0.216193	-10.3577	0.00590129	0.195209
101122471	PI16	NC_056073.1:10947188-10961239	3.93795	13.689	-1.63533	0.00595914	0.196841
101106208	KLHDC8B	NC_056072.1:50901923-50906710	19.8004	7.5065	1.62024	0.00597413	0.196841
101120208	S100A10	NC_056054.1:101957782-101969019	210.833	444.972	-0.980125	0.00598484	0.196935
780460	FGF18	NC_056069.1:3398691-3435035	0.695394	3.15345	-1.99559	0.00603433	0.198159
121818828	GPR39	NC_056055.1:178378946-178649261	0.334546	0.106979	1.80393	0.00603784	0.198159
114109996	LOC114109996	NC_056054.1:237301251-237302005	715.838	352.306	1.1631	0.00605467	0.198194
101108755	SYNE2	NC_056060.1:74154999-74478974	13.7777	27.7015	-0.925218	0.00608636	0.198459
101101950	LRRTM3	NC_056078.1:22641628-22844565	0	0.005867	-8.80562	0.00608648	0.198459
101104813	CCDC180	NC_056055.1:50276044-50332436	0	0.008182	-7.49682	0.00611701	0.198865
121818210	LOC121818210	NC_056080.1:14729496-14807899	0	0.0158137	-8.81228	0.00612269	0.198865
101120375	ACSM1	NC_056077.1:18706881-18763346	63.5405	180.41	-1.35063	0.00615768	0.199607
101118121	ODAD2	NC_056066.1:36005480-36175612	0.949672	0.309055	1.66137	0.00616144	0.199607
101114771	ELMO1	NC_056057.1:61461730-62043012	6.08896	14.0015	-1.08055	0.00619463	0.200423
101109781	CSRNP3	NC_056055.1:143879600-144090253	0.073817	0.271481	-1.76823	0.00627602	0.202275
443247	SLC1A2	NC_056068.1:64573795-64740182	0.0191413	0.214162	-3.49203	0.00629463	0.202614
101122138	LOC101122138	NC_056071.1:45674833-45741267	0	0.0174153	-8.79109	0.00633091	0.203001
101120250	TMEM200A	NC_056061.1:55924744-56014144	0.407228	3.1252	-2.82403	0.00638426	0.204191
101111630	SH3RF2	NC_056058.1:54889529-55041213	0.0525137	0.23519	-2.015	0.00642564	0.204992
121820546	LOC121820546	NC_056064.1:13136200-13380448	23.6759	7.41089	1.91139	0.00646315	0.2057
101117553	CCBE1	NC_056076.1:58717805-58947028	1.4995	6.09833	-1.9592	0.00647148	0.2057
101123656	LOC101123656	NC_056067.1:63301065-63308547	0.161107	0	8.8344	0.00647242	0.2057
101111152	ELN	NC_056077.1:33738523-33770923	19.535	51.2124	-1.1643	0.00649703	0.206221
101116471	PROM2	NC_056056.1:104429219-104445926	0	0.205091	-10.2651	0.00651686	0.20659
101106520	LAMB4	NC_056057.1:50584942-50702633	1.02326	0.23738	2.06559	0.00656554	0.207608
101123401	FCAR	NC_056067.1:63283719-63294530	0.282145	0	10.1338	0.00660514	0.208556
101109410	SHISA9	NC_056077.1:12127940-12479016	0	0.009103	-10.2482	0.00661212	0.208556
101117068	PPM1H	NC_056056.1:156769622-157065084	4.80549	2.53765	1.08129	0.00662637	0.208606
101108809	C2CD6	NC_056055.1:203815742-203940080	0	0.00993167	-8.88935	0.00663032	0.208606
101114392	NOVA1	NC_056071.1:34475983-34646831	4.51179	9.81894	-1.01423	0.00666959	0.208667
101119187	TINAGL1	NC_056055.1:235889842-235926162	122.923	65.4253	1.0568	0.00668397	0.208667
101108939	CAMK1D	NC_056066.1:16279288-16672804	2.21404	5.43145	-1.26232	0.00668516	0.208667
101120201	SPDEF	NC_056073.1:8724478-8743733	0	0.161333	-10.2426	0.00668672	0.208667
114118711	LOC114118711	NC_056069.1:1972910-1975250	25.9206	10.2971	1.488	0.00669043	0.208667
101120899	TEX28	NC_056080.1:80158856-80166195	0	0.059978	-7.43663	0.00675073	0.209746
101104760	LACTB2	NC_056062.1:47290182-47324422	29.9541	15.5835	1.11569	0.00675652	0.209746
101118274	ELOVL6	NC_056059.1:15561913-15701183	638.731	179.431	2.04368	0.00675937	0.209746
101115574	MGST2	NC_056070.1:18092003-18126733	20.0161	9.98218	1.1736	0.0067766	0.209791
101101977	GARS1	NC_056057.1:67240175-67291403	16.2348	9.46362	0.929259	0.00679798	0.210193
101103901	PAPLN	NC_056060.1:82783938-82820876	0.517646	1.68082	-1.53428	0.00680967	0.210196
101122360	BANK1	NC_056059.1:23017781-23347159	1.19892	2.83413	-1.12328	0.00682119	0.210196
121820289	LOC121820289	NC_056062.1:12704072-12704970	144.839	68.93	1.22472	0.00686702	0.211287
443206	IL18	NC_056068.1:22156486-22185715	4.37151	8.9457	-1.08526	0.00689727	0.211958
101103771	LOC101103771	NC_056054.1:103749564-103750996	77.9245	16.6421	2.4424	0.00694249	0.213087
101102057	LOC101102057	NC_056058.1:14321480-14324755	3.35468	16.4496	-2.18168	0.00697034	0.21368
101122136	DCHS2	NC_056070.1:3183860-3527054	0.229202	1.05289	-2.0362	0.00698676	0.213923
XLOC_042209	XLOC_042209	NC_056057.1:107010584-107071512	1.09203	0.0103027	6.46945	0.00700343	0.214172
101115808	LOC101115808	NC_056064.1:60669093-60724305	45.2779	24.1245	1.01253	0.00702401	0.214488
101117759	GABRA1	NC_056058.1:71119254-71179205	0.919881	0.287854	1.80837	0.0070376	0.214488
101122299	MLYCD	NC_056067.1:9776413-9789734	11.6027	5.93866	1.12141	0.00705152	0.214488
121817356	C20H6orf201	NC_056073.1:49176188-49183131	0	0.055431	-7.26061	0.0070587	0.214488
114114084	LOC114114084	NC_056056.1:218980762-218985098	10.1661	1.85736	2.59955	0.00705891	0.214488
101121717	HRH1	NC_056072.1:55140213-55248959	2.45708	7.9186	-1.57621	0.00708868	0.214946
114109057	LOC114109057	NC_056071.1:65532883-65540512	0.034146	0.453998	-3.56186	0.00710591	0.215209
101113269	CAPN5	NC_056068.1:55217326-55273732	2.35561	6.18602	-1.30341	0.00712846	0.215632
101108307	COL23A1	NC_056058.1:37021378-37402331	0.111871	0.483819	-2.11131	0.00719406	0.217354
443326	LOC443326	NC_056063.1:30408378-30431841	1.2078	3.37669	-1.38625	0.00723902	0.218169
101116912	TMEM87A	NC_056060.1:35815402-35855769	29.4429	17.5848	0.89604	0.00725046	0.218169
443456	LOC443456	NC_056054.1:90319385-90353156	40.1962	12.9692	1.92347	0.00726449	0.218169
101120972	GPAM	NC_056075.1:32219904-32288784	330.696	91.14	2.08818	0.00728065	0.218393
100174906	ITM2C	NC_056055.1:232662318-232675140	68.533	146.652	-1.00636	0.00735939	0.21994
101120299	COLEC11	NC_056055.1:1974183-1997029	0	0.0732247	-7.36358	0.00736725	0.21994
101111700	SFXN5	NC_056056.1:94962557-95088775	64.7253	22.6357	1.72453	0.00739323	0.220453
101109659	ROR1	NC_056054.1:39176244-39634033	1.26031	2.70592	-0.9486	0.00740529	0.220551
101108334	TSKS	NC_056067.1:55850728-55863105	26.6716	12.9684	1.23239	0.00742936	0.220972
101121537	HERPUD1	NC_056067.1:24552230-24563466	132.09	55.2424	1.46744	0.00743701	0.220972
101111913	GLYCTK	NC_056072.1:48670236-48677019	9.46444	2.79589	2.05181	0.00744668	0.220997
101118330	FSTL1	NC_056054.1:185993225-186050892	137.738	285.198	-0.931755	0.00749511	0.222117
101109885	ANKRD6	NC_056061.1:47926177-48109048	13.0064	7.47064	0.963907	0.00750209	0.222117
641296	ITGAL	NC_056077.1:27180482-27223386	2.65521	6.00439	-1.0533	0.00753997	0.222492
443053	CP	NC_056054.1:239698459-239759672	0.0134527	0.129006	-3.13209	0.00754136	0.222492
101115434	NDUFS1	NC_056055.1:208246898-208280323	29.7199	15.2755	1.14271	0.00761948	0.224533
101106160	SERHL2	NC_056056.1:219342455-219362484	44.3509	22.2636	1.17729	0.00765611	0.225348
101105358	LOC101105358	NC_056069.1:14972125-15082051	1.54156	0.583484	1.61012	0.00766798	0.225433
101108206	TTC7A	NC_056056.1:77278984-77394176	2.45651	5.72704	-1.16022	0.00768919	0.225529
101101961	PCDH19	NC_056080.1:134399014-134528326	0.223461	0.626977	-1.3368	0.00774131	0.226792
101109454	ADGRB3	NC_056062.1:5048235-5939626	0.652086	0.212985	1.62411	0.00778419	0.227253
101109544	SYTL3	NC_056061.1:82800188-82892773	4.03129	1.92419	1.24822	0.00781882	0.227872
101105264	CLUH	NC_056064.1:23468115-23489508	19.196	11.1377	0.942221	0.00782354	0.227872
101110498	IGF2BP3	NC_056057.1:32845972-32997613	0.00799467	0.0685123	-2.94371	0.00788647	0.229084
101113580	SEMA3A	NC_056057.1:37523237-38067701	0.607569	1.70441	-1.46519	0.00790221	0.229084
101118812	CHST8	NC_056067.1:43531750-43672983	0.078091	0.87209	-3.35678	0.00791076	0.229084
100303605	KRT5	NC_056056.1:133840461-133846557	0	0.456011	-10.0817	0.00793231	0.229185
101111234	IRF4	NC_056073.1:51019405-51037038	0.462101	1.91451	-1.96503	0.00794498	0.229281
101112917	NAV1	NC_056065.1:80016302-80161864	2.33583	5.00074	-0.938474	0.00796173	0.229501
101109923	NDUFC2	NC_056074.1:15563020-15577194	86.1352	50.0084	1.46091	0.0079905	0.230066
101114620	LOC101114620	NC_056062.1:35276866-35418171	0.00908367	0.072591	-2.81532	0.00805454	0.231379
101118410	PRKCB	NC_056077.1:22049759-22424434	0.908528	1.8292	-1.10722	0.00809419	0.231775
101111939	GLIS3	NC_056055.1:72137625-72627800	1.1309	2.31625	-1.02522	0.00809901	0.231775
101106517	COBL	NC_056057.1:5361674-5667161	0.0197757	0.10983	-2.31427	0.00810524	0.231775
101112837	CASZ1	NC_056065.1:42064480-42220278	0.482534	1.17266	-1.27961	0.00811654	0.231834
101103160	MAP3K9	NC_056060.1:80471875-80557495	0.533047	1.51688	-1.33994	0.0081779	0.233321
101121531	PLEKHG5	NC_056065.1:46203752-46254940	2.9725	7.72559	-1.28078	0.00823678	0.23448
101121307	ACSM3	NC_056077.1:18985820-19043809	96.727	30.426	1.93671	0.0082372	0.23448
101116756	LOC101116756	NC_056067.1:23477644-23507467	0.479462	0.077881	2.83302	0.00827113	0.235179
101109212	LOC101109212	NC_056072.1:43017764-43018702	116.205	51.3648	1.28999	0.00830828	0.235702
105608581	KCNA6	NC_056056.1:211159383-211196919	0.809366	2.39379	-1.46133	0.00837074	0.237206
101118985	NDUFS3	NC_056068.1:76309150-76313956	45.8772	23.1484	1.16209	0.00840716	0.237969
101104971	FNDC5	NC_056055.1:234791107-234799134	6.70087	2.4606	1.63267	0.00843245	0.238416
105605961	LOC105605961	NC_056063.1:70898251-71036469	0.00640667	0	8.45694	0.00849688	0.239446
101117488	PDZRN4	NC_056056.1:145516083-145935032	0.0387277	0.185691	-2.25642	0.00850275	0.239446
101112238	SPNS2	NC_056064.1:24862778-24900348	2.81181	6.59063	-1.13677	0.00856085	0.240422
101107437	GPR37	NC_056057.1:90656104-90674210	2.02627	0.514592	2.14722	0.00858128	0.240726
105612764	C6H4orf54	NC_056059.1:25300427-25318330	0.0178777	0	7.15773	0.00875326	0.244731
101118665	FGL1	NC_056079.1:18551441-18576054	30.0893	10.4915	1.54988	0.00878447	0.245164
101111568	CCDC7	NC_056066.1:19358118-19618532	0.032513	0.309502	-2.36528	0.00878827	0.245164
100913159	ST6GAL1	NC_056054.1:200979762-201014327	6.80447	14.3612	-0.944266	0.00881922	0.245754
442998	PYGM	NC_056074.1:39436299-39448165	3.56795	1.08528	1.89432	0.00885565	0.246495
101120717	KCNH8	NC_056054.1:277370563-277832669	0	0.005601	-9.9804	0.00887629	0.246796
101104291	FBXO24	NC_056077.1:36392306-36401450	2.57602	0.426175	2.83035	0.00895512	0.248713
101119989	EPHA5	NC_056059.1:81550155-81962122	0.031067	0.439423	-3.82211	0.00903192	0.250568
101119741	PLD5	NC_056065.1:33710548-34123447	0.671128	0.0310563	4.42036	0.00905733	0.250996
101112675	RAI14	NC_056069.1:39485479-39647652	16.4928	9.535	0.932728	0.00908427	0.251465
101121875	BCO1	NC_056067.1:7385651-7415199	2.19115	0.489505	2.36277	0.00910888	0.25161
101106954	SDK2	NC_056064.1:56940148-57213491	0.064879	0.246832	-1.8532	0.00911253	0.25161
443074	FGF10	NC_056069.1:30604216-30700637	2.78602	6.44993	-1.07699	0.00914267	0.251761
443186	ACACA	NC_056064.1:13136279-13424653	338.975	116.544	1.7804	0.00915295	0.251761
101119069	TP53INP2	NC_056066.1:64039813-64049430	4.88961	1.69245	1.72133	0.00915514	0.251761
121819666	LOC121819666	NC_056058.1:66064187-66098966	0.0265833	0	8.59774	0.00917796	0.252113
101119609	FAM13C	NC_056078.1:14232355-14372126	6.11664	12.4557	-0.934384	0.00921119	0.252749
101108203	ADCY3	NC_056056.1:32312809-32401058	1.77591	3.85931	-1.04083	0.00922741	0.252918
100127210	PRKAA2	NC_056054.1:31182711-31268150	5.60658	3.48974	0.863557	0.00926569	0.25369
101113991	IL3RA	NC_056080.1:6647391-6666755	1.67357	5.19079	-1.44294	0.00928746	0.254009
101116788	LIPH	NC_056054.1:202410303-202462887	0.0200837	0.208001	-3.23059	0.00933226	0.254957
101115456	ECSCR	NC_056058.1:48382543-48390680	34.0496	71.5212	-0.952026	0.00934462	0.255014
101106452	LOC101106452	NC_056067.1:13430841-13437695	248.761	137.265	1.02199	0.009375	0.255014
100568286	CYP2D6	NC_056056.1:218940622-219003889	8.54402	3.34392	1.60866	0.00939642	0.25532
101113342	SLC46A3	NC_056063.1:31718441-31742176	26.3553	13.1277	1.08095	0.00941448	0.255534
101123654	COQ9	NC_056067.1:25036391-25048864	27.8328	13.6074	1.22311	0.00946296	0.256478
101121279	RGS7	NC_056065.1:34641494-35155100	3.21458	1.11169	1.79948	0.00948133	0.256478
101123374	WNT3A	NC_056058.1:2804547-2878903	0	0.035036	-9.89989	0.00948594	0.256478
121820683	LOC121820683	NC_056064.1:17053339-17084867	0.0263097	0	8.36441	0.00949011	0.256478
101119000	GPLD1	NC_056073.1:32257445-32325270	2.28499	0.762099	1.73223	0.00953288	0.257357
101109316	PLPP4	NC_056075.1:40023051-40168556	0.0164747	0	9.78864	0.00958887	0.258591
100170327	FASN	NC_056064.1:50277417-50296144	906.849	263.413	2.02152	0.00965229	0.260022
101108837	ATP8B4	NC_056060.1:58290301-58586071	5.08373	10.7543	-0.980265	0.00968953	0.260535
443541	PGD	NC_056065.1:42416362-42430897	163.013	97.7145	0.890577	0.00970198	0.260535
101122970	CDH26	NC_056066.1:56198267-56280726	0.00415833	0.384346	-5.45364	0.00970248	0.260535
100329218	SREBF1	NC_056064.1:34382401-34398512	20.8588	8.62921	1.48944	0.00985911	0.263894
101109267	SVOPL	NC_056057.1:103730693-103836215	0.45725	0.132965	1.9099	0.00988839	0.264299
101118084	PTP4A2	NC_056055.1:235541673-235567732	95.9178	58.7039	0.848363	0.00989527	0.264299
101110361	DTX4	NC_056068.1:80974880-81016049	2.05561	0.928444	1.26987	0.0100096	0.266185
100135455	LOC100135455	NC_056065.1:78470473-78471309	650.259	329.046	1.11432	0.0100134	0.266185
101120690	ANGPTL5	NC_056068.1:6590448-6606149	7.36521	17.4703	-1.12292	0.0100417	0.266509
100037695	TNFRSF11B	NC_056062.1:58345488-58374909	0.131734	0.650161	-2.1823	0.010086	0.266986
114117267	PHLDA3	NC_056065.1:80260437-80266906	33.1679	18.085	1.02655	0.0100938	0.266986
101120089	SH3BGRL2	NC_056061.1:6458900-6627532	7.23449	4.10416	0.938383	0.0101022	0.266986
101107224	RXFP1	NC_056070.1:40575489-40691511	0.0173583	0	9.74111	0.0101375	0.267637
121820182	LOC121820182	NC_056061.1:26192741-26247328	0.0368573	0	9.73699	0.0101688	0.26818
101102647	LOC101102647	NC_056060.1:28200820-28255931	2.24511	0.636313	1.85038	0.0102101	0.268987
101115360	OGDH	NC_056057.1:78434135-78501015	120.76	54.9569	1.33932	0.0102328	0.269303
101106659	MAOB	NC_056080.1:42875586-42996659	7.66122	16.1144	-0.939067	0.0102925	0.270306
101123241	RHO	NC_056072.1:56174257-56180658	0.0466903	0	6.98608	0.0103546	0.271655
101112891	LOC101112891	NC_056073.1:26406304-26420566	8.05185	23.3451	-1.43935	0.0103794	0.27202
101123207	DBN1	NC_056058.1:36661214-36675402	14.7421	31.079	-0.996864	0.010405	0.272406
443366	PTGFR	NC_056054.1:54941051-55005149	2.40872	6.16779	-1.30832	0.0105165	0.27504
101123510	HFM1	NC_056054.1:68531995-68685231	0.00269467	0.0642707	-4.58813	0.0105495	0.275614
101105252	NAAA	NC_056059.1:91520747-91547258	11.703	6.42129	0.942475	0.0105815	0.275877
101106389	EPHB3	NC_056054.1:203400543-203420761	2.02946	0.429093	2.25131	0.0106224	0.27614
101117586	MMRN1	NC_056059.1:35358882-35442000	5.61747	12.3971	-1.05294	0.0106387	0.27614
101106381	ADAMTSL4	NC_056054.1:100569024-100580068	4.00795	10.5761	-1.25733	0.010644	0.27614
101106569	SPRY3	NC_056080.1:81952504-82079896	1.80351	0.864176	1.16774	0.0106481	0.27614
101120694	CCNB1	NC_056069.1:10618577-10628248	2.77703	0.835944	1.84998	0.0106517	0.27614
101113628	CNTN3	NC_056072.1:27096456-27505205	0.0327513	0.119931	-1.72555	0.0106625	0.27614
101103031	AK4	NC_056054.1:40740898-40835953	89.6021	27.427	1.93385	0.0106686	0.27614
101109816	ADORA1	NC_056065.1:701052-742083	5.70856	2.52902	1.47295	0.0106883	0.276365
101102156	LOC101102156	NC_056064.1:19296324-19314990	3.97455	1.52638	1.4475	0.0107307	0.276893
101114126	ACSS2	NC_056066.1:64181303-64224335	728.759	220.226	1.93567	0.0107889	0.277916
101116876	DKK1	NC_056075.1:6636040-6639640	0	0.105967	-7.19506	0.0108087	0.277916
101117301	C25H10orf71	NC_056078.1:42487505-42537916	0.131333	0.737417	-2.14952	0.0108262	0.277916
121819170	LOC121819170	NC_056056.1:116437477-116472005	0	0.0262697	-8.46259	0.010856	0.278123
101116336	LOC101116336	NC_056067.1:23441533-23469387	920.723	409.921	1.36266	0.0109647	0.279261
443049	PDXK	NC_056054.1:264462662-264493143	16.4419	8.98077	1.06342	0.0109671	0.279261
101105026	C9	NC_056069.1:35254776-35320036	0	0.034412	-9.77625	0.0110001	0.279545
101111959	DYRK4	NC_056056.1:211359400-211408025	0	0.0185307	-8.4023	0.0110005	0.279545
101111323	STAB1	NC_056072.1:48425831-48451295	9.41167	20.5909	-1.05541	0.0110394	0.280249
101103115	MCRIP2	NC_056077.1:1080852-1092640	24.8113	5.1636	1.68177	0.0110764	0.280622
101112654	AGPAT4	NC_056061.1:84531388-84665649	0.423992	1.19187	-1.39198	0.01116	0.282455
101117663	TBX20	NC_056057.1:63391283-63438766	0.0424213	0.276914	-2.52787	0.0111808	0.282696
101115049	TMC6	NC_056064.1:53357503-53375073	3.36314	0.827602	1.96652	0.0112269	0.282952
443229	SMAD1	NC_056070.1:12802526-12884946	11.1582	21.135	-0.865489	0.0112336	0.282952
101117308	DES	NC_056055.1:221345177-221352233	3.36698	10.074	-1.52016	0.0112361	0.282952
101111344	PLCD4	NC_056055.1:220582609-220610628	1.51067	4.80426	-1.48141	0.0112952	0.284156
101108913	CRLF1	NC_056058.1:4385074-4422899	20.708	10.3969	1.32633	0.0113821	0.286057
101114836	B4GALT6	NC_056076.1:25798570-25870582	1.81715	0.499456	2.00842	0.0115082	0.288187
101118310	LOC101118310	NC_056072.1:12942163-13160323	1.08688	2.87228	-1.27753	0.0115099	0.288187
121820610	LOC121820610	NC_056054.1:107245253-107275021	0.026685	0	8.25422	0.0115128	0.288187
101107865	TRIP10	NC_056058.1:15491402-15500993	26.7833	52.2857	-0.841818	0.0115343	0.288311
101111145	PSTPIP2	NC_056076.1:46121226-46217332	20.2693	10.4923	1.14547	0.0115511	0.288311
101107595	TEX43	NC_056058.1:24995493-25000811	0	0.057088	-6.91251	0.0116363	0.289834
101104417	RBM38	NC_056066.1:58398127-58435022	9.65706	3.6899	1.57533	0.0116486	0.289854
101109123	DTX1	NC_056070.1:61158876-61198032	1.30609	3.04573	-1.12312	0.0116902	0.290313
101113900	MPV17L	NC_056077.1:14321322-14327840	5.0883	1.08757	2.44801	0.0117176	0.290705
101120966	PRDX1	NC_056054.1:20135449-20145938	316.461	161.767	1.13686	0.0117571	0.291397
101120890	LOC101120890	NC_056055.1:81963360-82444309	1.64248	4.01152	-1.37822	0.0118915	0.294147
101107286	PDE8B	NC_056060.1:8363123-8631930	4.45768	9.87232	-0.991644	0.0120102	0.296208
101115814	PROCR	NC_056066.1:64438542-64466096	7.41207	17.263	-1.13961	0.0120842	0.29745
121817109	LOC121817109	NC_056071.1:45507933-45607769	0	0.021072	-9.68384	0.0121048	0.297665
101114543	ITIH5	NC_056066.1:12033767-12119534	33.3788	74.0341	-1.02522	0.0121209	0.297768
780521	LEF1	NC_056059.1:17434883-17557177	0.322395	1.18702	-1.77921	0.0121462	0.298097
101113888	STXBP6	NC_056071.1:32795411-33064737	4.79066	10.2593	-0.98998	0.0121854	0.298769
101113910	APOO	NC_056080.1:22239794-22306768	9.18604	4.21505	1.29585	0.0122079	0.299029
101119394	GPAT3	NC_056059.1:98993788-99056662	6.14765	2.96862	1.19106	0.0122614	0.299886
101110189	LOC101110189	NC_056074.1:15572513-15577058	1948.25	648.871	1.8045	0.0123639	0.300504
101123647	AKAP1	NC_056064.1:7631187-7662605	63.0935	31.3408	1.21031	0.0124005	0.301103
101118317	CPT2	NC_056054.1:27723917-27746951	20.4512	10.9525	1.08182	0.0124171	0.301214
101123010	LOC101123010	NC_056054.1:264499185-264503451	29.8152	10.4879	1.5307	0.0124353	0.301363
101105111	ERC2	NC_056072.1:44644155-45645828	0.106755	0.325181	-1.42085	0.0125013	0.302186
101123341	LOC101123341	NC_056054.1:260269866-260338529	14.4889	6.48726	1.21561	0.0125084	0.302186
101103743	RGS16	NC_056065.1:63093820-63099463	2.65528	8.51489	-1.61688	0.0125199	0.302186
101114409	MYH11	NC_056077.1:14622730-14749438	6.65125	15.0394	-1.10992	0.0125294	0.302186
101103834	FTL	NC_056067.1:55282352-55283924	243.412	130.122	0.994558	0.0125615	0.302669
101119791	LOC101119791	NC_056079.1:33502208-33586019	0	0.009276	-8.20574	0.0126578	0.304697
101104247	RGS17	NC_056061.1:77701970-77809588	0	0.007609	-8.27582	0.0127022	0.305473
101114324	RNF125	NC_056076.1:25477219-25524118	8.56128	5.21	0.831106	0.0127431	0.305871
101111037	FMOD	NC_056065.1:919068-929084	17.8407	7.15542	1.40144	0.0127809	0.306163
101108995	LOC101108995	NC_056055.1:142237375-142312758	0.357846	0.0390153	3.27071	0.0127885	0.306163
100144763	CCND1	NC_056074.1:43282125-43294598	7.67202	15.8564	-0.93482	0.0127919	0.306163
121819713	LOC121819713	NC_056058.1:105841629-105858419	0.0298203	0.376261	-3.48422	0.0128073	0.306241
101104808	LOC101104808	NC_056055.1:203021338-203089369	0.132463	0.536666	-1.87272	0.0128626	0.307064
101115107	BOLA3	NC_056056.1:95963200-95971258	23.8113	9.7711	1.49038	0.0128782	0.307064
121817552	MRGPRG	NC_056074.1:44789455-44795292	0.0205487	0.563251	-4.39922	0.0128906	0.307064
101104376	PPEF1	NC_056080.1:16936082-17083708	2.07477	1.06455	1.14736	0.0129205	0.307484
101113015	UBR7	NC_056071.1:55651884-55669364	16.8157	9.40445	1.01099	0.0130105	0.309332
101109581	MRPL28	NC_056077.1:893359-895970	35.0587	15.5231	1.35373	0.0130543	0.309786
101122157	S100A9	NC_056054.1:103735666-103738350	33.7972	11.1646	1.79814	0.0130716	0.309904
101118849	LOC101118849	NC_056078.1:42985740-43006170	26.4485	14.5706	1.03636	0.0131028	0.310059
101103596	SEMA4B	NC_056071.1:20891221-20933797	1.23802	3.18915	-1.21538	0.0131651	0.31124
101102559	CERS4	NC_056058.1:14633898-14668417	0.55906	1.78463	-1.55427	0.0131957	0.31167
101123617	GPR45	NC_056056.1:97281050-97321478	0.100678	0	8.19631	0.0132413	0.312282
101105924	OSR2	NC_056062.1:78239081-78246804	0.308006	1.73825	-2.36783	0.0132491	0.312282
100125616	TNMD	NC_056080.1:134234617-134253741	0	0.040183	-8.21692	0.0133054	0.312282
101103188	TDRD9	NC_056071.1:66200722-66313276	2.51681	1.1022	1.2432	0.0133087	0.312282
101118234	SYT12	NC_056074.1:41418739-41441578	1.12115	0.302615	2.08289	0.0134108	0.314383
101121979	ADGRF4	NC_056073.1:20685224-20715304	0	0.0281033	-8.17157	0.0134326	0.314602
101102300	TMEM182	NC_056056.1:98996264-99066915	27.2595	9.08071	1.80093	0.013472	0.314716
101117593	AIG1	NC_056061.1:67708101-67966308	23.7741	13.074	0.884149	0.0134853	0.314716
101118648	HEPHL1	NC_056074.1:257105-349458	0.00696167	0	8.1675	0.0134899	0.314716
101118186	KLF2	NC_056058.1:6465222-6467632	8.8512	25.2358	-1.42422	0.0135002	0.314716
101115684	ALAS2	NC_056080.1:53050996-53077724	5.96258	2.45227	1.31726	0.0135326	0.31518
101118143	NTM	NC_056074.1:31966046-32920053	0.23833	0.58836	-1.1853	0.01357	0.315756
101119500	SSC5D	NC_056067.1:62781444-62803738	1.23903	3.45606	-1.39355	0.0136506	0.317044
114116368	LOC114116368	NC_056062.1:43029556-43070247	70.9946	36.0044	1.08998	0.0137154	0.317926
100534656	HNF4A	NC_056066.1:72742413-72809128	19.7624	9.86236	1.18021	0.0137265	0.317926
101112791	ACO1	NC_056055.1:101546129-101611247	66.7233	40.9772	0.860607	0.0138054	0.319305
101114570	ATP5PB	NC_056054.1:88872604-88888114	99.4837	55.3992	1.00042	0.0138115	0.319305
101114518	HOXA5	NC_056057.1:70470180-70505523	0.67102	1.77271	-1.47685	0.0138321	0.319487
101119737	NPTX1	NC_056064.1:51525895-51595899	0.556934	1.70169	-3.20853	0.0138479	0.319559
101113454	NGEF	NC_056054.1:7973698-8102046	0.029085	0.413153	-3.47517	0.0139482	0.320987
101115172	LOC101115172	NC_056054.1:269001773-269028730	239.5	75.7254	1.89463	0.0139924	0.321438
101107508	LSP1	NC_056074.1:45967840-46012699	32.6434	60.4069	-1.01448	0.0139977	0.321438
101114702	NDUFS7	NC_056058.1:41483388-41489203	132.601	71.6723	1.07045	0.014121	0.323187
114116641	RAP2A	NC_056063.1:73976947-74018612	7.70638	14.8508	-0.844902	0.0141562	0.323696
101106707	CDH8	NC_056067.1:28950183-29345571	0.306056	0.803079	-0.985779	0.0141723	0.32377
114116835	DCXR	NC_056064.1:50373224-50375838	76.4757	33.4354	1.37816	0.0142793	0.324124
101112227	RPS27L	NC_056060.1:45079653-45083120	195.144	109.516	0.996781	0.014313	0.324329
101113565	GABRA3	NC_056080.1:83375750-83619455	0.135315	0.402697	-1.50416	0.0143987	0.325829
101121067	GNA14	NC_056055.1:59185216-59382045	0.541178	2.53957	-2.09469	0.0144052	0.325829
101123478	HID1	NC_056064.1:55784037-55804914	3.71374	7.83565	-0.969765	0.0144401	0.326325
443058	SPP1	NC_056059.1:37363570-37376486	25.6419	6.1569	2.03693	0.0145428	0.327957
114113035	LOC114113035	NC_056055.1:111046983-111081420	0.601691	0.156937	2.73642	0.0145479	0.327957
101114450	NHSL1	NC_056061.1:63493612-63757657	1.22002	2.53067	-0.968758	0.0145515	0.327957
101113397	LYPD6B	NC_056055.1:160300031-160548399	0.526158	0.136418	2.14009	0.0146345	0.329533
101106811	CLDN8	NC_056054.1:126339803-126341910	0	0.889964	-9.5171	0.0146504	0.329571
101109898	EEF1A2	NC_056066.1:53854713-53862458	0.743659	0.0350597	4.37184	0.0146706	0.329571
114110852	LOC114110852	NC_056078.1:12480156-12483661	2.00306	7.90545	-1.91101	0.014757	0.330456
101121153	SUSD1	NC_056055.1:11345497-11480946	0.692198	2.03767	-1.56819	0.0147651	0.330456
101112706	COL4A5	NC_056080.1:126470341-126732394	0.792431	1.76354	-1.08565	0.0147707	0.330456
101123433	CPB1	NC_056054.1:240083883-240123216	0.0154583	0	7.92544	0.014844	0.331277
101120879	HSPA12A	NC_056075.1:36596366-36779275	15.4573	32.6909	-0.904753	0.0148583	0.331304
101121129	NDUFV1	NC_056074.1:41864271-41870009	67.9772	35.9993	1.10272	0.0148936	0.331501
101104372	CA5B	NC_056080.1:13849152-13956558	4.80522	10.6687	-1.06003	0.0149736	0.332986
101109966	ARHGAP26	NC_056058.1:51461115-51943192	4.3245	7.52715	-0.826695	0.0149953	0.33302
443163	RGS2	NC_056065.1:11622739-11626048	7.72069	2.24754	1.87377	0.0150149	0.33302
101118007	RTCB	NC_056056.1:176617403-176639693	28.682	17.1377	0.902533	0.0150645	0.333488
101106710	FAM83E	NC_056067.1:55001871-55012471	0.0241033	0	6.74548	0.0150922	0.333488
101109855	LRRC20	NC_056078.1:25708805-25785442	7.02	2.70741	1.59955	0.0151012	0.333488
101105035	LOC101105035	NC_056073.1:43812916-43915573	5.487	13.8891	-1.48857	0.015119	0.333488
101114404	CBLB	NC_056054.1:171302227-171524028	3.11044	5.86061	-0.836779	0.0151213	0.333488
443535	LDLR	NC_056058.1:13369769-13404256	4.58146	2.49672	1.01641	0.0151494	0.333488
101107090	RFX2	NC_056058.1:16153744-16260815	1.46491	3.44558	-1.09914	0.0151613	0.333488
101109588	HLCS	NC_056054.1:269646109-269860550	20.3159	10.133	1.04385	0.0151665	0.333488
101105859	TAFA4	NC_056072.1:32667845-32882772	0.768836	0.0533603	3.28639	0.0151973	0.333488
100270720	NDUFA12	NC_056056.1:131195092-131222661	79.2503	44.0438	1.02672	0.0152016	0.333488
101116487	RDH10	NC_056062.1:49588777-49618257	8.80203	5.35003	0.841277	0.0152119	0.333488
101104806	GJB1	NC_056080.1:63925842-63932875	0	0.113601	-7.19882	0.0152208	0.333488
101107434	SCUBE1	NC_056056.1:219900694-220029628	0.013759	0.091734	-2.70065	0.0152281	0.333488
101105154	LOC101105154	NC_056057.1:94531774-94573809	1.07492	0.470219	1.82226	0.0152352	0.333488
101118261	LDHB	NC_056056.1:194115852-194134183	499.12	290.79	0.952671	0.0152643	0.333543
101106734	LOC101106734	NC_056054.1:264321663-264406608	4.44098	2.58537	0.94367	0.0154374	0.336447
101121433	KLHL1	NC_056063.1:44548404-45096863	0	0.00336	-9.45206	0.0155337	0.338252
101104655	FLNC	NC_056057.1:94495000-94523869	2.56624	6.07934	-1.18418	0.0155926	0.339241
101118667	NEIL2	NC_056055.1:105535392-105545622	60.5929	35.9889	0.906463	0.0156499	0.340193
101119602	BCL2	NC_056076.1:61703616-61902043	24.4555	15.7673	0.821059	0.015676	0.340466
101120525	LOC101120525	NC_056070.1:50853102-50878674	27.6125	9.44793	1.71841	0.0157066	0.340539
101107196	RBPJ	NC_056059.1:46220530-46458981	14.109	26.2774	-0.800111	0.0157566	0.34133
114113021	LOC114113021	NC_056055.1:90751878-90758708	0.093357	0	8.01188	0.0158211	0.342157
443231	ADCYAP1R1	NC_056057.1:66793921-66913580	0.65991	1.95915	-1.43298	0.0158357	0.342157
101108622	ST6GALNAC5	NC_056054.1:53268409-53485584	0.121929	0.376535	-1.59295	0.0158678	0.342556
114117771	SIGLEC14	NC_056067.1:57668569-57671834	1.33998	0.131888	3.30522	0.0159544	0.343245
101111824	WFDC8	NC_056066.1:74386263-74410245	0.0738517	0	9.44631	0.0159774	0.343445
105613829	LOC105613829	NC_056064.1:47555845-47569742	0.587808	0.107036	2.54676	0.0160487	0.344683
105609643	GATAD1	NC_056057.1:10525789-10573257	32.6229	19.435	0.900647	0.0161154	0.345047
101118385	CDH12	NC_056069.1:51231936-51722903	0.00349733	0	9.31068	0.01612	0.345047
101114796	ITIH2	NC_056066.1:12146000-12177718	0	0.022349	-8.10274	0.0161206	0.345047
101117209	GDE1	NC_056077.1:17575039-17600463	79.0935	36.2543	1.32338	0.0161672	0.34575
101119342	OVAR-DRB1	NC_056073.1:25360277-25371398	23.5057	54.2326	-1.09506	0.0162928	0.34814
100422802	PAX2	NC_056075.1:21354736-21446040	0.584211	0.058328	3.26647	0.0163562	0.3489
121819513	LOC121819513	NC_056057.1:83295313-83424278	0.037852	0.904995	-4.3004	0.016454	0.350094
101119652	GRTP1	NC_056063.1:85941202-85960285	5.54473	2.0429	1.64071	0.0165148	0.350693
101110727	LOC101110727	NC_056077.1:36970393-37003067	0	0.0208673	-7.98135	0.0165635	0.350693
101105711	PMM2	NC_056077.1:8199912-8225461	16.3873	9.88199	0.909352	0.016575	0.350693
101119649	CHMP4C	NC_056062.1:93742038-93773812	1.18896	2.76555	-1.11837	0.0165804	0.350693
101106757	ADD2	NC_056056.1:92720962-92846170	0.688534	0.14098	2.27751	0.0165861	0.350693
101119920	RALGPS2	NC_056065.1:59544776-59704300	6.71914	1.84401	1.85975	0.0165939	0.350693
101103020	KCNK5	NC_056073.1:13071223-13112206	0.335804	1.08903	-1.63181	0.0166546	0.351384
101111847	LOC101111847	NC_056054.1:187240350-187307068	2.47411	0.566391	2.30555	0.0167287	0.352199
101120950	SMTNL1	NC_056068.1:79613770-79627977	0	0.050012	-8.09827	0.0167562	0.352199
101117592	MRAP2	NC_056061.1:52686454-52740153	0.426362	0.0472243	3.21319	0.0167604	0.352199
101121871	SKAP1	NC_056064.1:37790674-38096939	1.11102	2.31279	-0.969931	0.0167672	0.352199
101118866	ATP23	NC_056056.1:161706339-161731702	78.1993	42.9472	1.01937	0.0167774	0.352199
101109845	SFRP5	NC_056075.1:18747482-18752384	43.6785	131.834	-1.40064	0.0168064	0.352226
101122644	GPSM2	NC_056054.1:86210538-86259792	1.1654	3.04904	-1.33881	0.01682	0.352226
101101982	MINAR2	NC_056058.1:22161681-22183273	0.147106	1.11925	-2.31397	0.016844	0.352226
101116170	SOX6	NC_056068.1:35563095-36278876	7.47725	4.04885	1.04988	0.0168479	0.352226
101114891	LOC101114891	NC_056066.1:75223896-75230530	0.124757	0	8.28056	0.0168488	0.352226
100101238	LOC100101238	NC_056064.1:14147882-14153317	24.0888	56.8565	-1.18749	0.0168871	0.352733
101120263	TSHZ2	NC_056066.1:80594381-81088039	1.55231	3.109	-0.869472	0.0171525	0.357384
101108954	PEBP1	NC_056070.1:57094020-57102233	102.615	19.0095	1.20912	0.0171748	0.357553
443494	PURA	NC_056058.1:48959172-49025159	0.783832	2.66035	-2.01742	0.0172078	0.357942
100528012	HMBS	NC_056068.1:29395725-29403027	24.0172	12.6956	1.09458	0.0172251	0.358006
101116736	RNF146	NC_056061.1:11263864-11286333	25.1762	10.3764	1.4479	0.017296	0.359007
101113001	LOC101113001	NC_056067.1:495642-500172	334.61	197.992	0.913818	0.0173858	0.36034
101109969	CSF1R	NC_056058.1:59152070-59183558	15.7536	33.1717	-0.988216	0.0174224	0.36034
780527	SLC9A3R1	NC_056064.1:55965666-55982663	20.1828	11.6334	0.968808	0.0174336	0.36034
121817884	LOC121817884	NC_056077.1:273453-325579	0.611855	0	9.36133	0.0174379	0.36034
101104692	GPD1L	NC_056072.1:6617541-6675362	11.6918	6.89244	0.935366	0.0175696	0.361984
101111043	CBLC	NC_056067.1:52330663-52346555	0	0.038316	-7.88488	0.0175828	0.361984
101120997	LOC101120997	NC_056056.1:110526473-110527131	0.40078	5.60306	-3.62235	0.0175976	0.361984
106991878	RNF152	NC_056076.1:60620248-60700838	7.40871	4.4904	0.84013	0.0176157	0.361984
101112451	DDHD2	NC_056079.1:32481679-32508412	30.3649	17.864	0.932165	0.0176344	0.361984
443449	MSTN	NC_056055.1:119285858-119292614	0.465437	0.043653	3.59836	0.0176616	0.361984
101122523	MCTP1	NC_056058.1:91673380-92229973	3.27114	6.36151	-0.786182	0.0178306	0.364554
100499499	WSB2	NC_056070.1:57178585-57198174	39.9509	24.1987	0.87825	0.0179338	0.366033
101104592	NADK	NC_056065.1:50239181-50258761	73.2123	41.708	0.977104	0.0179466	0.366033
101102845	LOC101102845	NC_056072.1:20193543-20224907	0.0940337	1.63982	-3.97957	0.0179648	0.366106
101114460	AARS1	NC_056067.1:1284762-1305548	37.538	22.5228	0.902533	0.0180102	0.366182
101104483	PRKAG2	NC_056057.1:115711189-116019529	5.73828	9.75224	-0.777342	0.0180598	0.366258
101105044	LOC101105044	NC_056076.1:62372904-62388960	0.0356417	0	7.78483	0.0180828	0.366429
105603239	C18H14orf132	NC_056071.1:58608106-58657861	0.524182	1.42088	-1.38731	0.0181396	0.367132
100303604	KRT17	NC_056064.1:41576129-41581684	0	0.292726	-9.31012	0.0181782	0.367471
101121274	DYNLL2	NC_056064.1:8575929-8583127	78.7739	48.3817	0.853449	0.0181944	0.367504
101114471	ENTPD3	NC_056072.1:13239097-13272524	0.246599	0.020106	3.617	0.0182262	0.367849
101105363	PDE8A	NC_056071.1:21940084-22122373	27.6088	16.1813	0.952956	0.0182479	0.367992
101102388	TMEM229A	NC_056057.1:90051516-90055877	0	0.179199	-8.26365	0.0182684	0.368084
114117899	LOC114117899	NC_056067.1:51022212-51037757	0	0.0389523	-7.83815	0.0183007	0.368084
101111830	DCDC1	NC_056068.1:60490317-60966529	0.080382	0.199899	-1.19217	0.0183087	0.368084
100135441	TALDO1	NC_056074.1:46973765-46981318	471.856	276.394	0.936432	0.0183111	0.368084
101106946	FRK	NC_056061.1:21832320-21932960	1.31449	0.272732	2.29157	0.0183345	0.368259
101112539	HINT2	NC_056055.1:52731975-52734550	59.7274	27.5756	1.36648	0.0183729	0.368735
101121959	PSMA7	NC_056066.1:54748193-54753756	110.303	66.0877	0.902534	0.0183997	0.368979
101110288	ZMAT3	NC_056054.1:208769674-208808992	8.31314	5.02344	0.882438	0.0184284	0.369259
101118879	TPD52L1	NC_056061.1:13222022-13316433	0.142642	0.577274	-1.97386	0.0184682	0.369466
101122920	C26H8orf48	NC_056079.1:22567983-23087562	0.980933	2.03654	-1.83596	0.0185895	0.371597
101108766	PIK3C2B	NC_056065.1:2017054-2085919	2.21515	4.57156	-0.937813	0.0186094	0.3717
101109685	HADHB	NC_056056.1:33463788-33492678	252.627	152.677	0.885277	0.0186397	0.372009
101119560	PITX1	NC_056058.1:44090476-44096981	0.812526	0.0988493	3.21246	0.0187915	0.37474
100302546	RCHY1	NC_056059.1:91095444-91112271	16.8073	10.3514	0.850665	0.0188296	0.375073
121820316	LOC121820316	NC_056062.1:82324317-82377074	2.55684	1.28407	1.25277	0.018866	0.375332
101111720	LOC101111720	NC_056063.1:75600682-75608011	0	0.032297	-6.54219	0.0189093	0.375624
101109632	PLEKHM2	NC_056065.1:51134412-51173788	35.8067	22.828	0.797905	0.01892	0.375624
101114819	SLC41A3	NC_056072.1:60406763-60430253	8.13398	4.30687	1.08771	0.0189256	0.375624
101117659	PNPLA3	NC_056056.1:220546345-220566752	26.0137	9.61159	1.65451	0.018969	0.375892
101108589	SNAP25	NC_056066.1:3296300-3383842	0.43551	1.38553	-1.57654	0.019116	0.37775
443093	GOT2	NC_056067.1:26034216-26056500	28.7426	17.1201	0.915699	0.0191291	0.37775
101109876	GFRA3	NC_056058.1:47312171-47360521	0.293034	0.652501	-2.03912	0.0191304	0.37775
101121241	AWAT2	NC_056080.1:62940549-62951860	0	0.0525507	-7.84889	0.019138	0.37775
101103554	MFNG	NC_056056.1:181508479-181524093	11.5468	21.6657	-0.794935	0.0192159	0.378692
101117690	LOC101117690	NC_056066.1:78172606-78197846	27.6993	16.2219	0.936065	0.0193941	0.381904
114108762	ACOT9	NC_056080.1:22123732-22153185	80.6739	46.5768	0.960108	0.0194718	0.38301
101123463	NDUFA5	NC_056057.1:89465356-89482904	31.9345	14.9757	1.33015	0.0194808	0.38301
101108158	LRRC4C	NC_056068.1:69334460-70762495	1.49434	0.791056	1.09263	0.0194971	0.38303
101111183	ADAMTSL2	NC_056056.1:2502241-2536732	0.557881	0.148273	2.06465	0.019622	0.385151
101118175	TSPAN11	NC_056056.1:212323059-212395939	3.86623	1.82722	1.10206	0.0196357	0.385151
102238525	AK6	NC_056069.1:10494564-10508828	14.1042	7.22796	1.13769	0.0196511	0.385152
443040	CTLA4	NC_056055.1:205804447-205868243	0.310842	0.730197	-1.5418	0.0196811	0.38544
101123372	FCER2	NC_056058.1:14263289-14275865	0.0726237	0.580287	-2.71973	0.0197234	0.385678
101101990	LACTB	NC_056060.1:45097110-45112820	15.9582	9.60439	0.919605	0.019724	0.385678
101104319	LRRC66	NC_056059.1:68510164-68539410	0.207878	0.016677	3.7041	0.01974	0.385686
101115272	RHOQ	NC_056056.1:77752845-77794085	39.6611	25.354	0.797517	0.0197552	0.385686
101120167	PLEKHG3	NC_056060.1:74917177-74962092	4.45057	9.38162	-0.980981	0.0198407	0.386814
100170667	COX5A	NC_056071.1:31428668-31439293	104.165	55.4923	1.09873	0.019854	0.386814
101109813	ARL4D	NC_056064.1:43089018-43090968	2.71285	11.2898	-1.91586	0.0198709	0.386814
101112054	HSPA9	NC_056058.1:47566915-47582968	87.7433	50.862	0.966254	0.0199714	0.388097
101120001	LOC101120001	NC_056065.1:5010170-5017352	0.917407	6.34857	-2.9372	0.0200425	0.389178
101110748	GPRC5A	NC_056056.1:202628391-202648577	0.231294	0.972238	-2.00392	0.020066	0.389333
101106615	FXYD3	NC_056067.1:45133666-45140281	0	0.0725013	-6.47861	0.0201095	0.389575
101117415	RBM33	NC_056057.1:118946065-119061701	4.17466	5.8792	-0.858434	0.0202348	0.390617
101117861	CA6	NC_056065.1:43817504-43840863	0	0.064823	-9.20765	0.0202608	0.390698
101123388	KCNJ12	NC_056064.1:35067164-35104531	0.391601	0.100643	2.12542	0.0203008	0.391141
101111462	PLEC	NC_056062.1:13794093-13847859	25.9296	47.9521	-0.78161	0.0203278	0.391141
101102362	CLDN19	NC_056054.1:17217817-17222683	0	0.148206	-8.06335	0.0203305	0.391141
101120275	TMEM132B	NC_056070.1:50324818-50727930	0.057648	0.179026	-1.49663	0.0203716	0.391631
101105090	LOC101105090	NC_056065.1:50403098-50419622	7.31749	3.75635	1.14651	0.0203958	0.391781
101114065	GRIK3	NC_056054.1:11636013-11883516	0.095634	0.266284	-1.38074	0.0204168	0.391781
101120733	SP140	NC_056055.1:232230585-232313257	3.59067	8.02904	-1.06171	0.0204361	0.391781
101114114	RRAGD	NC_056061.1:48129363-48167263	5.18983	2.31007	1.28464	0.0204418	0.391781
101122554	CDK2AP1	NC_056070.1:52347967-52358411	12.2518	6.97571	0.96173	0.0205028	0.392071
101123199	CSF2RB	NC_056056.1:180969016-180992663	2.77262	6.28375	-1.11	0.0205066	0.392071
101115141	SCCPDH	NC_056065.1:29856498-29885662	37.235	83.7183	-1.05362	0.0205341	0.392071
101106413	PAX7	NC_056055.1:247601345-247708764	0	0.005097	-7.7097	0.0205346	0.392071
101112094	DNAH1	NC_056072.1:48566605-48648948	0.119775	0.0189923	2.82482	0.0205677	0.392071
101121016	PKIB	NC_056061.1:15736462-15857545	1.07897	2.89733	-1.33959	0.0205718	0.392071
100170317	ADRA2A	NC_056075.1:31106771-31110605	9.08228	26.0588	-1.38698	0.0205863	0.392071
101108160	C15H11orf52	NC_056068.1:21938903-21945948	0	0.218628	-9.18759	0.0206171	0.392071
101117443	LOC101117443	NC_056067.1:2054280-2058470	0	0.0524083	-6.47709	0.0206216	0.392071
101109385	NLRP5	NC_056067.1:64163764-64180456	0	0.0134267	-6.49723	0.0207088	0.39242
101109224	CDKN2C	NC_056054.1:25430819-25436766	32.6928	17.6302	1.0721	0.0207454	0.392801
101113437	NDUFB1	NC_056071.1:54612242-54623412	64.1775	33.7443	1.08241	0.0208084	0.393609
101115705	CFD	NC_056058.1:41092665-41094903	49.351	23.1569	1.17317	0.0208194	0.393609
101113259	LOC101113259	NC_056066.1:74199004-74205039	0.0871	0	7.81377	0.0209577	0.395627
101105033	SLC6A6	NC_056072.1:57717268-57805173	14.1987	6.56454	1.14983	0.0209851	0.395846
101120836	EFS	NC_056060.1:21369515-21380333	0.82047	3.24446	-1.88134	0.0210071	0.395965
101108131	LOC101108131	NC_056058.1:15518364-15554555	161.899	101.045	0.795695	0.0210548	0.396567
114108860	MRPL40	NC_056070.1:72724857-72727369	34.3909	16.2919	1.26505	0.0211467	0.397402
100101231	COL3A1	NC_056055.1:120362888-120403111	933.137	1931.06	-0.990357	0.0214137	0.401155
101114294	LOC101114294	NC_056066.1:11981888-11983005	8.55767	1.20022	3.0527	0.0214263	0.401155
101110091	CHCHD10	NC_056070.1:71272746-71275103	160.869	87.1747	1.06977	0.0214759	0.401786
101117962	SORL1	NC_056068.1:31804213-31969781	10.0961	5.53803	1.05896	0.0215212	0.401925
101103601	MPIG6B	NC_056073.1:26666224-26670659	0.0390257	0.500127	-3.57755	0.0216481	0.403803
101121007	ARHGEF37	NC_056058.1:58702099-58757412	17.6686	9.06627	1.15508	0.0217193	0.40483
101111871	SRGAP1	NC_056056.1:155746296-156044849	3.58835	2.20876	0.819293	0.0218065	0.405521
121817358	LOC121817358	NC_056073.1:33952306-33959148	0	0.030052	-6.38296	0.0218071	0.405521
101110118	PDHA1	NC_056080.1:17891869-17914843	59.3728	33.4983	1.01462	0.0218395	0.405566
101113599	LOC101113599	NC_056062.1:13694654-13696981	89.5635	47.3297	1.10712	0.0219382	0.406497
101117448	RILPL1	NC_056070.1:52152207-52193566	18.1925	11.5204	0.808251	0.0219849	0.40706
101105570	HAPLN4	NC_056058.1:3825488-3832161	0	0.0368613	-6.60123	0.0220549	0.407756
101115321	C2	NC_056073.1:26493554-26505376	7.65741	15.9704	-0.969327	0.0220836	0.407986
101119869	LOC101119869	NC_056054.1:257859342-257860550	8.99863	2.19469	2.16142	0.0221088	0.408088
100037674	TYMS	NC_056076.1:36000650-36014113	4.65642	1.96329	1.32255	0.0221268	0.408088
106990245	SH3GL2	NC_056055.1:86020520-86244359	2.46067	4.81376	-0.837723	0.0221379	0.408088
101106401	MAOA	NC_056080.1:42774720-42863793	43.859	86.0984	-0.839502	0.0222518	0.409887
101116782	WNT2B	NC_056054.1:89923118-89938117	0.36294	1.55888	-1.93422	0.022349	0.410803
101104068	SRP19	NC_056060.1:1088592-1097059	38.5993	23.1132	0.900974	0.0223553	0.410803
101102975	CPED1	NC_056057.1:87111044-87439537	32.6397	21.4281	0.791679	0.0223934	0.410803
101102607	NETO1	NC_056076.1:5268877-5378107	1.06753	0.319512	2.19619	0.0224107	0.410803
101113882	CREB3L1	NC_056068.1:75216121-75254140	2.63191	5.92421	-1.10548	0.0224161	0.410803
101116646	PHTF2	NC_056057.1:44833488-44967757	4.26195	8.22965	-0.874595	0.0224345	0.41084
101103763	ARHGEF3	NC_056072.1:44104867-44418730	6.93068	12.7972	-0.804441	0.0225264	0.411895
101105469	ADARB1	NC_056054.1:265653848-265767287	28.0312	16.6663	0.930772	0.0225577	0.411895
101108499	DZIP1	NC_056063.1:72324127-72374289	3.01326	5.76133	-0.828866	0.0226175	0.412687
114111339	LOC114111339	NC_056080.1:134153665-134165258	0.0348107	0.387752	-3.29321	0.0227195	0.413625
101114834	CREG1	NC_056054.1:119743422-119758072	114.52	74.0172	0.763389	0.022724	0.413625
101107350	MYOT	NC_056058.1:46996771-47015069	0	0.034083	-7.87524	0.0227318	0.413625
101109334	TRPC5	NC_056080.1:122885460-123228804	0.00355033	0	9.12002	0.0227348	0.413625
100820746	ANKRD1	NC_056075.1:12356715-12366049	0.847527	0.159417	2.55126	0.0227837	0.413997
101106422	INSIG1	NC_056057.1:118718227-118731421	42.4216	22.7692	1.07605	0.0228047	0.413997
101118381	CCKBR	NC_056068.1:46505544-46516712	0.0167797	0	6.35861	0.0228366	0.414276
101122799	KLF12	NC_056063.1:49104321-49625788	2.96293	5.71723	-0.845646	0.0228835	0.414828
101118063	SLC1A7	NC_056054.1:27616154-27667713	0.323956	0.0898057	1.94384	0.0229201	0.414943
101103673	OTULINL	NC_056069.1:58726668-58755738	25.9643	13.5642	1.01068	0.0229393	0.414943
101113821	KY	NC_056054.1:255348386-255398255	0.80235	0.371263	2.18605	0.0229395	0.414943
114118024	LOC114118024	NC_056067.1:58794450-58827187	3.62759	7.42269	-0.949584	0.0230228	0.415737
101108959	ITIH4	NC_056072.1:48148993-48163993	1.80579	4.5341	-1.22487	0.02304	0.415737
443091	MDH2	NC_056077.1:34698120-34710520	87.7004	49.913	0.995012	0.0234045	0.421394
101116044	ADIPOR2	NC_056056.1:214023226-214063563	167.388	108.541	0.764628	0.0234282	0.421394
121817901	LOC121817901	NC_056077.1:35958328-35963467	0.083093	0	7.58468	0.0235143	0.422299
101116951	TMC5	NC_056077.1:17484969-17566967	0.016628	0	7.59462	0.0235488	0.422444
101117893	SS18	NC_056076.1:31046398-31119012	61.9917	39.924	0.753931	0.0235561	0.422444
105609515	LOC105609515	NC_056054.1:25978150-25997609	0	0.0721837	-9.06523	0.0235928	0.422801
101108974	ALDH18A1	NC_056075.1:16935189-16975764	9.68563	6.27602	0.769892	0.0236896	0.423356
101109895	BAIAP2	NC_056064.1:51070049-51133908	9.14205	16.4491	-0.81269	0.0236912	0.423356
101111024	PPP1R14D	NC_056060.1:34560799-34570472	0.157159	1.06845	-2.50477	0.0239555	0.427167
443033	SFTPA1	NC_056078.1:34699832-34703943	0	0.0526223	-6.44267	0.0240024	0.427396
101104354	TMEM126A	NC_056074.1:9426013-9434760	18.0944	10.1805	0.997445	0.0240371	0.42743
101108509	ATP6V0D1	NC_056067.1:34609883-34647816	40.5565	26.6863	0.739697	0.0240384	0.42743
101108652	TMEM59L	NC_056058.1:4397750-4403308	7.01427	1.67243	2.09564	0.0241502	0.428811
101122265	NCKAP5L	NC_056056.1:136480240-136510941	6.11886	12.0317	-0.837188	0.0241881	0.428968
101104056	SOSTDC1	NC_056057.1:25942282-25946495	0	0.057551	-6.57317	0.0241932	0.428968
101114110	SPATA18	NC_056059.1:68577015-68624436	0.136846	0.0144167	3.39025	0.0242287	0.429023
101122519	MKNK2	NC_056058.1:19279842-19291485	29.823	18.3703	0.861945	0.0242305	0.429023
114108688	LOC114108688	NC_056060.1:74588257-74604395	0	0.030483	-7.56353	0.0242711	0.42944
114110475	LOC114110475	NC_056054.1:264526157-264529648	79.7486	43.6375	0.941883	0.0244398	0.432119
101115785	PPP1R9A	NC_056057.1:12965342-13310001	0.51535	1.14511	-0.979818	0.02453	0.432664
114108861	GNB1L	NC_056070.1:72869765-72895088	19.7458	10.8575	0.997527	0.0245688	0.432664
101122979	HMGCS1	NC_056069.1:31543986-31566698	25.4423	15.8166	0.817277	0.0245694	0.432664
101102494	EPM2A	NC_056061.1:70122868-70236924	2.19576	1.04966	1.27646	0.024574	0.432664
101106499	SPOCD1	NC_056055.1:235641428-235674556	0.0145437	0	7.57994	0.0246529	0.433447
101122416	FAM124B	NC_056055.1:226544373-226561735	2.03598	4.98594	-1.29052	0.0246889	0.433775
101123108	PIK3C2G	NC_056056.1:196943915-197438315	0	0.00276733	-9.03136	0.0247508	0.434558
101123499	CHRNB4	NC_056071.1:28810146-28826869	0.005767	0.154013	-4.68626	0.0248823	0.43606
105612995	LOC105612995	NC_056054.1:119743422-119758114	5.93976	3.00352	1.1589	0.0248885	0.43606
101113409	PPP2R2B	NC_056058.1:55514793-56038381	0.108368	0.357624	-1.69636	0.0249224	0.43635
101110777	LOC101110777	NC_056064.1:14050197-14052059	0	0.254877	-7.48392	0.0249824	0.436816
101107059	ATP13A4	NC_056054.1:194706359-194832242	0.00913133	0	9.03814	0.0249838	0.436816
101120172	NDRG1	NC_056062.1:21164803-21226080	31.808	64.0108	-0.924014	0.02504	0.437494
100192316	HADHA	NC_056056.1:33421140-33463463	94.875	62.9956	0.726751	0.0250744	0.437791
780518	LOC780518	NC_056068.1:33427239-33534398	3.6518	7.06813	-0.876726	0.0250928	0.437807
100137069	MTHFD2	NC_056056.1:96031254-96063029	3.23585	7.20503	-1.06392	0.0251662	0.438784
101106341	GPC5	NC_056063.1:66350875-67935545	0.219353	0.600958	-1.43991	0.0251989	0.438828
121816035	LOC121816035	NC_056066.1:57203625-57206901	0	0.095976	-6.93341	0.0252037	0.438828
101121199	FOLR1	NC_056068.1:50524460-50535842	0.0466197	0	7.66683	0.0252301	0.438927
101113128	COL4A6	NC_056080.1:126732495-127081023	0.297755	0.642116	-1.02595	0.025273	0.438927
101103632	PLA2G2C	NC_056055.1:246191245-246217833	0.767909	3.22499	-1.99011	0.0252758	0.438927
101109320	FAM234A	NC_056077.1:808110-827491	15.1313	20.7912	-0.973695	0.0253285	0.438927
105613553	CERT1	NC_056060.1:6780637-6919394	65.9439	42.8276	0.781261	0.0253318	0.438927
101114654	PELI3	NC_056074.1:40935190-40945722	4.43055	2.04372	1.25023	0.0253594	0.439102
101119259	CISH	NC_056072.1:49803328-49843826	1.46674	4.42029	-1.09897	0.0253879	0.439154
101113602	SUCLA2	NC_056063.1:18133374-18193381	32.7391	20.084	0.857511	0.0253974	0.439154
101106179	NDUFB9	NC_056062.1:28589097-28596695	120.816	72.0344	0.919137	0.0254369	0.439233
101115773	NDUFAB1	NC_056077.1:21793339-21804392	56.868	31.9988	1.01301	0.0256939	0.442149
101116238	SBSPON	NC_056062.1:49401715-49433554	1.24217	3.25653	-1.2842	0.0257628	0.443032
101122194	ACTN1	NC_056060.1:78754687-78850121	31.7435	20.1405	0.784815	0.0258231	0.443706
101114311	CCDC197	NC_056071.1:56316863-56409798	28.5791	22.4363	1.11928	0.0258373	0.443706
101110664	LOC101110664	NC_056056.1:103535551-103537604	435.359	241.165	1.03457	0.0259867	0.445965
101102522	C8B	NC_056054.1:31534318-31579387	0.248475	0.0500443	2.50133	0.0260378	0.446538
101113687	PCYT2	NC_056064.1:50481881-50489089	14.5584	7.3851	1.16086	0.0262062	0.448138
101120008	CHTF8	NC_056067.1:35895112-35905924	6.52265	14.9909	-1.146	0.0262204	0.448138
101110371	SCGB2A2	NC_056074.1:37249309-37252550	0	0.393615	-8.96223	0.026276	0.448783
101109747	LOC101109747	NC_056073.1:25458436-25463183	51.6653	107.602	-0.904963	0.0263119	0.448894
101111932	MYH15	NC_056054.1:174145669-174288778	0.0734797	0.007987	3.29346	0.0263458	0.448894
101107541	LOC101107541	NC_056066.1:42906903-42920658	0.281166	0.012062	4.79986	0.0263897	0.448894
101122250	DNAI1	NC_056055.1:37039781-37108761	0.110788	0.452105	-1.81802	0.0264536	0.449096
101114161	LRRC34	NC_056054.1:218228500-218247372	0	0.024417	-7.51465	0.0264968	0.449497
101109393	RASAL1	NC_056070.1:61198992-61231764	0.287232	1.06702	-1.74631	0.0265667	0.45
101111603	MICU3	NC_056079.1:19281298-19366804	10.5792	6.80148	0.796254	0.0265778	0.45
101102818	LOC101102818	NC_056061.1:20379963-20403617	0	0.0208063	-7.58432	0.0265911	0.45
101102527	LOC101102527	NC_056077.1:20211882-20237342	83.9614	49.9206	0.92898	0.0266161	0.45
101123418	TPMT	NC_056073.1:38695014-38717709	7.01097	3.78536	1.06072	0.0266645	0.450516
101120276	SYNE3	NC_056071.1:57989083-58092276	11.5651	21.2085	-0.748185	0.0267231	0.450898
101120016	RAPSN	NC_056068.1:76188917-76202556	0.050459	0	7.30833	0.0268882	0.453379
101117171	SNTB1	NC_056062.1:94788104-95033143	25.449	13.9621	1.03776	0.0271412	0.457259
101103035	SLC25A16	NC_056078.1:24081332-24110230	67.9344	32.6939	1.2573	0.0271562	0.457259
101110441	SPG7	NC_056067.1:14011469-14032489	24.3681	15.1932	0.849893	0.0271767	0.457259
101119495	GNAO1	NC_056067.1:23754035-23935718	0.111451	0.406626	-1.71187	0.0271911	0.457259
101113506	METTL21C	NC_056063.1:78270362-78281638	0.747608	0.111331	2.7438	0.0273117	0.458529
101119863	KCNE2	NC_056054.1:121756268-121767081	0	0.0400533	-7.40082	0.0273161	0.458529
443399	CYM	NC_056054.1:87785035-87795277	0.0392033	0	7.52458	0.0273214	0.458529
101119489	PARK7	NC_056065.1:44760111-44777054	124.052	76.6952	0.862693	0.0273506	0.458712
101114941	LOC101114941	NC_056065.1:5502919-5645816	0.376103	0.0571767	2.94861	0.0274141	0.459469
114116361	CEBPD	NC_056062.1:32140218-32141770	92.262	55.8573	0.85741	0.0275384	0.460916
101119297	SHANK3	NC_056056.1:225883883-225935017	4.02479	7.66545	-0.815829	0.0275742	0.460916
101117513	CD109	NC_056061.1:388444-528243	15.3149	28.3481	-0.800075	0.0275893	0.460916
101117467	LDLRAD1	NC_056054.1:28535767-28546703	0	0.0432603	-7.49747	0.0275933	0.460916
100135692	GLRX2	NC_056065.1:11345779-11367522	42.84	19.1208	1.11262	0.0276106	0.460916
101122716	CDH4	NC_056066.1:54869074-55347468	2.38611	5.45851	-1.09232	0.0276404	0.461108
121817738	AKAIN1	NC_056076.1:39202169-39235307	0	0.0370593	-8.90607	0.0276613	0.461151
101106323	LOC101106323	NC_056058.1:15941191-15946417	44.8122	25.1932	1.00885	0.0276883	0.461293
101110180	LIF	NC_056070.1:69263571-69280589	0.23536	1.27696	-2.07857	0.0277702	0.462045
114117539	MALRD1	NC_056066.1:19975314-20576159	0.00198567	0	8.76476	0.0278717	0.463026
101101927	EMC3	NC_056072.1:16761123-16776407	77.3536	49.4756	0.801755	0.0278845	0.463026
101104568	LOC101104568	NC_056056.1:179479641-179488350	33.1268	66.9862	-0.899265	0.0279296	0.463469
101114040	SFMBT2	NC_056066.1:11753093-11935265	1.18838	2.14565	-0.760226	0.0279729	0.463881
101123048	ENPP1	NC_056061.1:57223151-57297381	4.10472	7.79412	-0.834843	0.0280176	0.464315
101105401	NR1H4	NC_056056.1:169947009-170026496	0.0544437	0	8.75612	0.0280759	0.464975
100034669	TAC1	NC_056057.1:15770236-15778970	19.867	46.08	-1.14094	0.0282408	0.467089
101105041	LOC101105041	NC_056075.1:14758843-14801084	4.4416	8.39036	-0.863677	0.0282757	0.467178
101112070	OSGIN2	NC_056062.1:86715531-86746212	4.38162	2.25162	1.3293	0.0282834	0.467178
101122540	DDRGK1	NC_056066.1:51712434-51722707	49.066	31.685	0.786311	0.028327	0.467456
101107246	AGPAT3	NC_056054.1:264628160-264717368	30.1007	18.8965	0.832136	0.0283374	0.467456
101118523	FBXL13	NC_056057.1:45628033-45852251	0.0645237	0.366681	-2.35378	0.0284133	0.468284
101121718	LOC101121718	NC_056073.1:10646242-10659285	42.1551	28.1882	0.831129	0.0284249	0.468284
101103565	SAR1B	NC_056058.1:43760511-43789384	29.44	17.8523	0.894118	0.0284907	0.46906
101110949	HS6ST3	NC_056063.1:72672494-73405627	0.00136667	0	8.73485	0.0285638	0.469955
101102634	C3H2orf73	NC_056056.1:69695491-69722728	0.171762	0.712915	-2.03197	0.0286933	0.471469
101102496	GRHL2	NC_056062.1:75668165-75840488	0.00672167	0.143542	-4.26988	0.0287976	0.472387
101102435	RIMS3	NC_056054.1:15159172-15204874	6.42368	3.61726	0.976716	0.0288229	0.472387
101123343	TRAP1	NC_056077.1:3563672-3613563	12.8368	7.80902	0.893086	0.0288311	0.472387
101106802	COL21A1	NC_056073.1:4195281-4439215	0.992803	3.03651	-1.50589	0.0288433	0.472387
101122823	MRGPRF	NC_056074.1:42743693-42753008	2.2933	6.01446	-1.3137	0.0288946	0.472616
101113423	NT5M	NC_056064.1:34617393-34630219	6.57058	3.55596	1.04938	0.028899	0.472616
101119637	GLI3	NC_056057.1:80422358-80736956	2.03746	4.01569	-0.929486	0.0289138	0.472616
101107153	LOC101107153	NC_056054.1:185300057-185307344	297.149	171.969	0.977125	0.0289497	0.472756
101113211	LOC101113211	NC_056071.1:67723152-67735094	23.6463	5.47714	2.10181	0.0290478	0.473058
101105676	ENKUR	NC_056066.1:25173694-25211777	0.428496	1.32946	-1.55269	0.0290744	0.473058
101118040	SLC13A3	NC_056066.1:75235911-75322562	0.186486	0.0418127	2.35447	0.0291123	0.473058
443424	SC5	NC_056072.1:51674064-51676023	1.00599	0.031823	4.92889	0.0291236	0.473058
101118379	DMPK	NC_056067.1:53098140-53107811	5.5181	11.91	-0.964204	0.0291293	0.473058
101105034	CDCP1	NC_056072.1:54055749-54117479	0.093528	0.329926	-1.69583	0.0292682	0.474611
101109786	RAPGEF3	NC_056056.1:138817589-138847228	7.83727	14.3792	-0.775149	0.0294548	0.476992
101122162	MRPL50	NC_056055.1:21759427-21766932	13.5193	7.618	0.987296	0.0294665	0.476992
101104870	MTF2	NC_056054.1:70263513-70338487	3.97759	6.89355	-0.749331	0.0295723	0.478193
101115950	EML4	NC_056056.1:81756185-81905369	12.0733	7.51201	0.788696	0.0295788	0.478193
101104150	SOD3	NC_056059.1:44891199-44983609	19.3145	44.1699	-1.01814	0.0297054	0.479667
101113538	LOC101113538	NC_056072.1:12634689-12641995	0	0.0758147	-7.55758	0.0297273	0.479667
101110635	ADAMTS5	NC_056054.1:130018461-130075578	15.5323	36.0335	-1.15424	0.0298295	0.481008
101121303	MS4A10	NC_056074.1:34509927-34525241	0.0247577	0	7.43547	0.02992	0.48197
101105549	DIPK2A	NC_056054.1:245501734-245523685	19.7155	10.7326	1.02646	0.0299275	0.48197
101111413	ATP5F1A	NC_056076.1:46227193-46235727	315.935	197.311	0.848821	0.0299618	0.482212
100147786	SLC25A20	NC_056072.1:51090363-51128262	52.266	37.4461	0.759324	0.029984	0.482261
101116740	RAB20	NC_056063.1:84535850-84565855	8.22258	5.27164	0.779158	0.0300692	0.48332
101122836	NUDT11	NC_056080.1:54025514-54031677	0.914169	0.0702587	3.89885	0.0300948	0.483424
114108602	LOC114108602	NC_056080.1:91477413-91480384	3.98504	0.907444	2.26802	0.0301553	0.483885
114118728	LOC114118728	NC_056054.1:111853514-111859982	0	0.061973	-7.25645	0.0301814	0.483885
101117174	PNPO	NC_056064.1:38244600-38259033	17.5733	7.35838	1.37815	0.0302539	0.484151
106990092	LOC106990092	NC_056057.1:72335628-72341080	13.4538	5.76613	1.34169	0.030258	0.484151
101105203	PIEZO2	NC_056076.1:42710021-42967602	1.68347	3.83927	-1.14936	0.0302751	0.484151
101105588	LAMC1	NC_056065.1:63502751-63624368	60.6996	111.47	-0.727438	0.0303022	0.484276
114110450	LOC114110450	NC_056076.1:33411592-33537732	4.54801	2.16672	1.4777	0.0304368	0.485696
101111843	REG4	NC_056054.1:97166705-97193167	0.0370843	0	8.81048	0.0304489	0.485696
101107535	KIF1C	NC_056064.1:26268153-26290022	89.759	55.6824	0.847936	0.0304491	0.485696
101113798	MINAR1	NC_056071.1:23366427-23399951	0.00601433	0.0816297	-3.61089	0.030652	0.487693
101115170	DCST1	NC_056054.1:105250072-105266107	0.009827	0	6.1477	0.0306733	0.487722
101106849	FSIP1	NC_056060.1:33434139-33656380	7.30604	4.20179	0.967821	0.0308467	0.489859
101113863	GTF3A	NC_056063.1:32766073-32776608	11.349	6.8194	0.874546	0.0309062	0.490198
101117608	PSMC4	NC_056067.1:48901152-48911599	38.1729	24.7637	0.775135	0.030907	0.490198
101113941	ARFGEF3	NC_056061.1:63246925-63428350	1.68395	3.11858	-0.782377	0.0310762	0.491389
101104200	CSF1	NC_056054.1:87231611-87253291	8.67572	17.658	-0.907808	0.0310778	0.491389
101103256	THBD	NC_056066.1:41414792-41418438	3.72143	10.9868	-1.43828	0.03108	0.491389
101116120	VSTM4	NC_056078.1:42286683-42366808	12.1004	7.12483	0.843988	0.0311283	0.491395
101107077	RECK	NC_056055.1:52428924-52512327	7.90283	14.6099	-0.79123	0.0311283	0.491395
101112365	MGST3	NC_056054.1:117706042-117728061	117.535	143.395	0.780873	0.0311391	0.491395
101102549	LOC101102549	NC_056060.1:84949518-84964352	12.9783	3.06457	2.13949	0.031208	0.492174
101107547	CADM4	NC_056067.1:51655371-51670233	0.14769	0.806242	-2.38179	0.031283	0.492479
101112732	WFS1	NC_056059.1:103615018-103659699	28.6496	15.6706	1.06445	0.0312881	0.492479
101118164	LOC101118164	NC_056055.1:105201972-105219870	53.8224	20.4984	1.56849	0.0313981	0.493603
101111328	PHGDH	NC_056054.1:97076507-97107600	10.3161	5.59245	1.0727	0.0314301	0.493603
101110095	LOC101110095	NC_056072.1:51310969-51319531	60.6678	36.218	0.92816	0.0314394	0.493603
101123503	FANCD2	NC_056072.1:16711458-16761065	0.865534	0.369783	1.27446	0.0315042	0.493603
101108368	PSMD14	NC_056055.1:148377538-148480140	37.9363	24.3862	0.792912	0.031515	0.493603
101114675	EIF2S3	NC_056080.1:22415936-22454189	62.0541	40.6969	0.758118	0.0315342	0.493603
101121565	CADM3	NC_056054.1:110119922-110152473	0.856889	2.1524	-1.23383	0.0315346	0.493603
101110592	C6H4orf19	NC_056059.1:57562947-57640397	1.10775	0.229944	2.4615	0.0315779	0.493732
101107962	CDC34	NC_056058.1:40852993-40859561	27.6781	15.9729	0.970074	0.0315822	0.493732
101121620	SOGA1	NC_056066.1:65816377-65891307	2.19389	4.02938	-0.772566	0.0317281	0.495465
101118280	SEC63	NC_056061.1:29460223-29522101	50.3164	33.2566	0.75705	0.0317325	0.495465
101111041	LOC101111041	NC_056066.1:74163655-74169920	0	0.0671023	-7.31201	0.0317723	0.49549
100302083	CDKN1A	NC_056073.1:10676449-10684891	4.97988	2.02604	1.57889	0.0318194	0.49549
101113279	LOC101113279	NC_056071.1:32570550-32580688	0.181875	1.06629	-2.42383	0.0318534	0.495504
100913154	ALDH1L1	NC_056072.1:60432666-60459071	24.1109	13.1951	1.06793	0.0318896	0.49576
101120210	ZNF521	NC_056076.1:31743244-32056342	5.56077	11.2706	-0.97046	0.0320833	0.497929
101118659	ABCD3	NC_056054.1:71539658-71615579	27.6091	18.2325	0.758558	0.0320997	0.497929
105614852	LOC105614852	NC_056054.1:66396248-66420818	12.1524	6.55406	1.00846	0.0322372	0.499617
101112737	SKOR1	NC_056060.1:14634374-14643363	0	0.0177283	-6.07103	0.0322697	0.499811
443452	SLC7A1	NC_056063.1:31228425-31290410	2.46157	5.38298	-1.00079	0.0323237	0.50034
101117702	MCEE	NC_056071.1:25141860-25150211	68.4749	39.7583	0.959204	0.0323987	0.501192
101112663	IL19	NC_056065.1:4445575-4454988	0	0.039739	-7.2012	0.0325095	0.501548
101116072	NMNAT1	NC_056065.1:42833157-42889417	26.4048	15.9984	0.890629	0.0325216	0.501548
101121483	CDC14A	NC_056054.1:77679881-77861722	2.52436	4.56287	-0.749909	0.0326544	0.502743
101121771	PPARGC1B	NC_056058.1:58809041-58967400	3.08007	1.83603	1.30819	0.0326918	0.502937
101103062	NDUFA7	NC_056058.1:14700189-14707467	98.6974	57.1188	0.969545	0.0327365	0.503316
100216465	ATF4	NC_056056.1:216768342-216770443	184.773	113.416	0.870512	0.0327614	0.503391
101105152	DLD	NC_056057.1:50447464-50474365	58.1916	35.1778	0.903058	0.0328038	0.503639
101120058	ADAM28	NC_056055.1:41355896-41434059	1.54071	0.501965	1.61487	0.0328899	0.504439
101104657	TNIP1	NC_056058.1:60075064-60126054	71.6628	49.2053	0.670276	0.0329641	0.504527
101108654	LOC101108654	NC_056058.1:57168625-57172856	0	0.251385	-8.70446	0.0329924	0.504527
101114370	USP12	NC_056063.1:32939081-32996834	21.1704	13.7096	0.772609	0.0330324	0.504527
114115282	LOC114115282	NC_056059.1:25706336-25736081	1.56697	0.392451	2.32535	0.0330363	0.504527
101109291	PKP1	NC_056065.1:79185870-79226336	0.00410133	0.0916193	-4.20227	0.0331291	0.50533
101117195	GALNT9	NC_056070.1:44893894-45014408	0	0.00924067	-8.67708	0.0332257	0.506495
443467	AHR	NC_056057.1:26780710-26831471	3.69245	6.55174	-0.763292	0.03325	0.506558
101115359	LOC101115359	NC_056056.1:193655556-193683168	0	0.0132727	-7.14862	0.0333191	0.507006
443451	ATOX1	NC_056058.1:60709910-60734089	98.46	55.809	0.894275	0.0333376	0.507006
101119915	ADPRHL1	NC_056063.1:85971065-85996933	0.00571	0	6.04093	0.0334016	0.507571
101122108	LOC101122108	NC_056058.1:49501070-49537420	0	0.0115053	-7.38131	0.0334175	0.507571
101120110	RETREG1	NC_056069.1:56691664-56848935	14.2423	34.4948	-1.10638	0.0335543	0.508418
114117240	LOC114117240	NC_056054.1:97865027-97955391	3.55152	0.828555	2.20595	0.0336228	0.509148
101111800	ETF1	NC_056058.1:47528925-47556123	41.2071	26.9696	0.77168	0.0337409	0.510629
101119050	LOC101119050	NC_056060.1:20903451-20915230	62.1647	39.8333	0.795616	0.0338243	0.511582
101118159	CHP2	NC_056077.1:21951341-21955567	7.46677	16.9542	-1.0829	0.0338457	0.511598
101103199	CA14	NC_056054.1:100337844-100345030	0	0.031688	-6.12509	0.0338748	0.51173
101119904	ARHGAP24	NC_056059.1:100964948-101542349	3.40495	6.36656	-0.96266	0.0342094	0.515758
101103889	ERBB3	NC_056056.1:163434376-163455689	0.315878	1.04975	-1.61797	0.0342236	0.515758
101107993	NDUFAF2	NC_056069.1:18369456-18545372	7.09287	3.51103	0.892765	0.0343918	0.517051
101106611	BPIFB2	NC_056066.1:61967282-61986151	0	0.054898	-8.66633	0.0344165	0.517112
101104898	C3H9orf50	NC_056056.1:6895659-6902899	0.680809	0.127878	2.42659	0.0344581	0.517247
100233165	CNGB3	NC_056062.1:88859537-89042610	0.00472133	0	8.52135	0.0344666	0.517247
105605547	PRRG3	NC_056080.1:84029692-84041037	0.516097	1.82902	-1.72042	0.0345351	0.517965
554321	LTF	NC_056072.1:52949688-52979789	7.64433	2.65376	1.78202	0.0346383	0.518893
101122468	BRK1	NC_056072.1:16697978-16705278	111.452	72.9835	0.769744	0.0347543	0.520009
101114374	DUSP3	NC_056064.1:43404335-43417626	26.0353	16.8793	0.77896	0.0348005	0.520088
101114701	OLFM2	NC_056058.1:12302567-12376586	0.908826	0.307899	1.55182	0.0348009	0.520088
101105534	PAX9	NC_056071.1:44599142-44613481	0.00798267	0.151627	-4.19384	0.0348251	0.520139
101112477	CPVL	NC_056057.1:68574934-68710938	0.610938	1.76878	-1.21256	0.0349401	0.521237
443010	PRKG1	NC_056075.1:6687943-8080976	10.6376	7.37448	0.74242	0.0351098	0.52319
101105659	FGFRL1	NC_056059.1:118028022-118040476	68.3203	46.0773	0.718911	0.0351322	0.52319
101122713	NIBAN1	NC_056065.1:65263760-65438225	35.7676	64.2188	-0.752477	0.0351336	0.52319
101119706	LOC101119706	NC_056056.1:86037309-86045825	21.9666	6.93789	1.69829	0.0351558	0.523211
101121966	CLPB	NC_056068.1:50606045-50747873	6.49087	4.32353	0.747664	0.0352064	0.523338
101109925	UBE2U	NC_056054.1:39652217-39730865	0	0.0200397	-8.61271	0.0352096	0.523338
101117286	LOC101117286	NC_056074.1:37813436-37821311	0.0414927	0.845723	-4.08125	0.0352477	0.523338
101114267	HOXA11	NC_056057.1:70437496-70441208	4.18611	1.10243	2.00811	0.0353772	0.523901
101107704	LDB2	NC_056059.1:112525422-112993823	6.98538	12.3939	-0.700427	0.0353901	0.523901
101103625	SPATS2L	NC_056055.1:202606813-202791134	32.9386	21.544	0.716404	0.0354007	0.523901
101121271	PEX7	NC_056061.1:62098430-62174374	12.3671	7.97369	0.793652	0.0354083	0.523901
101108411	ECHDC3	NC_056066.1:15818742-15852827	34.2944	21.9163	0.80409	0.0354147	0.523901
101105532	CHEK2	NC_056070.1:68150258-68196780	2.00378	4.29248	-1.05911	0.0354317	0.523901
101110099	LOC101110099	NC_056074.1:37233295-37236064	0	0.364497	-8.62717	0.0355091	0.524736
101108353	NDUFB4	NC_056054.1:186171464-186177442	78.7304	49.1775	0.847494	0.0355458	0.524969
101116327	CARS2	NC_056063.1:84604584-84629731	23.0435	14.7856	0.803913	0.035603	0.52535
101117632	PYROXD2	NC_056075.1:19269481-19317660	1.07233	3.32173	-1.47237	0.0356134	0.52535
101105022	LOC101105022	NC_056068.1:79456353-79463731	0.480674	0.0320307	3.98502	0.0357048	0.526389
101111910	SEC14L3	NC_056070.1:69433192-69442788	7.28093	2.81747	1.56264	0.0358538	0.527823
101108696	LOC101108696	NC_056073.1:25315729-25319802	2.98377	26.1293	-2.96967	0.0359341	0.528397
105608408	CHAD	NC_056064.1:35979090-35991350	0.777625	3.05072	-1.73639	0.0359462	0.528397
101119234	RASAL2	NC_056065.1:58915035-59315836	5.9557	11.2905	-0.822652	0.0360841	0.529881
101107749	TLL2	NC_056075.1:17524422-17668578	0.0277877	0.115156	-1.88593	0.0360894	0.529881
101114007	NDUFA6	NC_056056.1:218902884-218912709	166.603	95.0376	0.997354	0.0361408	0.530325
101115117	LOC101115117	NC_056057.1:12842844-12920713	12.071	7.46713	0.784664	0.0362207	0.530624
100147788	SLC25A5	NC_056080.1:114995510-114997960	24.4475	12.3502	1.15375	0.0362252	0.530624
101123162	DHCR24	NC_056054.1:29276944-29310898	77.243	29.8469	1.59184	0.0362288	0.530624
100126866	TERT	NC_056069.1:71190615-71208135	0	0.020075	-7.06302	0.0362612	0.530624
101123485	KCNG1	NC_056066.1:78916751-78933514	0.772343	0.217464	1.90421	0.0362879	0.530624
101103393	PMM1	NC_056056.1:218478375-218488355	16.9862	9.04801	1.10468	0.0363095	0.530624
101104072	DCBLD1	NC_056061.1:20478690-20556005	3.85736	2.44364	0.826328	0.0363183	0.530624
101109798	PALM	NC_056058.1:40978245-41002960	21.2335	39.0054	-0.810852	0.0363358	0.530624
101104112	BDH1	NC_056054.1:192783700-192821650	19.2135	7.31536	1.60004	0.0363576	0.530624
101108615	FADS2	NC_056074.1:36909332-36946966	3.33727	1.82324	1.01705	0.0363725	0.530624
101108445	CCT6A	NC_056077.1:28161960-28271847	30.3532	18.4724	0.950075	0.0367291	0.534894
101106613	CCN5	NC_056066.1:73072719-73085643	14.0713	26.5211	-0.830523	0.0368545	0.536409
101120794	ACSM4	NC_056077.1:18927452-18951401	0.0126207	0	6.9106	0.0369528	0.537336
101105527	KCNIP1	NC_056069.1:2425311-2848170	0.0674193	0.699345	-3.20505	0.036961	0.537336
101106623	ARHGAP20	NC_056068.1:20266864-20477771	9.30232	5.95348	0.85839	0.0370139	0.537581
101115115	LOC101115115	NC_056057.1:41861049-41968317	621.964	423.054	0.677495	0.0370206	0.537581
101101920	SELENOP	NC_056069.1:31962728-31972534	98.3155	177.216	-0.706708	0.0371347	0.538524
105607800	NTN1	NC_056064.1:28269570-28476358	13.5961	24.5317	-0.717463	0.0371499	0.538524
101109283	CCDC42	NC_056064.1:28076977-28089965	0.022242	0	6.91784	0.0372643	0.538952
101112473	REXO4	NC_056056.1:2640559-2648569	13.7959	7.77639	0.994169	0.0372654	0.538952
101110817	SLC7A2	NC_056079.1:18897976-18967285	3.81373	7.00014	-0.790507	0.0373463	0.53941
101106433	THBS1	NC_056060.1:33434131-33449943	127.855	63.1305	1.05318	0.03736	0.53941
101113960	RSPH14	NC_056070.1:71857763-71906124	1.70615	0.646512	1.60044	0.0373906	0.539521
101114004	SLC4A8	NC_056056.1:134750550-134856521	0.422108	0.082387	1.93157	0.0374775	0.540464
101111410	ATP5MK	NC_056075.1:23673100-23678431	224.909	129.321	0.983047	0.0375545	0.540713
105605669	XG	NC_056080.1:5996698-6030029	62.7072	119.043	-0.839784	0.0376819	0.540803
101106537	METTL13	NC_056065.1:38463716-38480586	4.3732	2.18794	1.19868	0.0376981	0.540803
101104080	IDH3B	NC_056066.1:52242549-52247494	78.9553	48.1755	0.908965	0.0377037	0.540803
443410	ATP5MC1	NC_056064.1:37362671-37365346	57.7689	32.5382	1.00727	0.0377096	0.540803
101123151	RBM46	NC_056070.1:2692493-2748397	0.265413	0.0332597	2.79793	0.0377395	0.540803
101115914	IFRD2	NC_056072.1:50091658-50120887	10.8463	6.68163	0.883012	0.0377805	0.540803
101108664	STARD13	NC_056063.1:27816091-28319681	13.443	24.8766	-0.762131	0.037801	0.540803
101106906	PTK2B	NC_056055.1:38360028-38498089	3.89161	8.4294	-1.04196	0.0378186	0.540803
101111570	TOMM40	NC_056067.1:52408394-52419901	19.8534	12.6019	0.821044	0.0378241	0.540803
101107484	PC	NC_056074.1:41272774-41373941	6.72037	3.15089	1.22896	0.0378469	0.540821
101104951	APCDD1	NC_056076.1:42641301-42673958	22.2313	13.183	0.853884	0.0379241	0.541402
101114470	FAM174B	NC_056071.1:13744753-13784570	2.1777	4.15736	-0.825097	0.0379307	0.541402
101115782	PMPCA	NC_056056.1:3066574-3076578	28.1388	16.724	0.933505	0.0380975	0.543194
121820619	HAP1	NC_056064.1:41671859-41680819	0.684601	0.103464	2.76374	0.0380995	0.543194
101102895	L3MBTL2	NC_056056.1:218194658-218212937	10.963	6.66206	0.895675	0.0382556	0.54511
101115920	SELENBP1	NC_056054.1:101258702-101267475	29.7884	17.1968	0.944579	0.0383497	0.54614
101118045	LRP3	NC_056067.1:43128381-43141886	20.2235	11.1103	0.984402	0.0384567	0.54721
XLOC_061388	XLOC_061388	NC_056060.1:28825938-28911309	2.1706	1.04631	1.08556	0.0384684	0.54721
101103517	LOC101103517	NC_056073.1:30641256-30690186	0.0253333	0.238905	-2.80492	0.0386175	0.548258
100147779	SLC35A4	NC_056058.1:49404571-49405545	0.0831627	1.67219	-4.01862	0.0386294	0.548258
101114623	CYSLTR2	NC_056063.1:18700488-18810067	3.23201	5.44775	-1.13789	0.0386694	0.548284
100216328	LAMC2	NC_056065.1:63664387-63732166	0.0935577	0.37885	-1.87366	0.038762	0.548867
101103105	ELAPOR1	NC_056054.1:86409861-86488306	0.00772167	0.168006	-4.42131	0.0388615	0.548867
101121414	LOC101121414	NC_056056.1:180321220-180354186	3.78271	1.40905	1.67229	0.0388661	0.548867
100216434	CDKN1C	NC_056074.1:45107163-45109518	312.659	208.505	0.736898	0.038869	0.548867
101105799	PPA1	NC_056078.1:25622835-25656522	16.1802	10.1526	0.848199	0.0389324	0.548931
101107472	NEFH	NC_056070.1:68699310-68707062	0.0362923	0	7.01041	0.0389499	0.548931
101116769	LOC101116769	NC_056071.1:19020057-19029340	0.030884	0	6.86023	0.0390048	0.548931
105610236	TIAF1	NC_056064.1:20378907-20379687	1.971	0.121873	4.00835	0.0390695	0.549534
101113541	HMGCLL1	NC_056073.1:4973324-5168044	0.682383	0.390118	0.895044	0.0391044	0.549717
101112806	BHLHE41	NC_056056.1:189424631-189429298	15.4173	8.67191	0.978802	0.0392302	0.551069
101117988	ERO1B	NC_056078.1:8275693-8336806	3.51268	6.51936	-0.770671	0.0392445	0.551069
101105337	RGS22	NC_056062.1:77192402-77330055	0.835476	2.14541	-1.24702	0.0392986	0.551212
101114976	MS4A14	NC_056068.1:81758715-81786010	0.0110123	0	7.12293	0.0394066	0.552111
XLOC_037183	XLOC_037183	NC_056056.1:136207353-136213954	594.853	291.196	1.23762	0.0394685	0.552669
101121321	ELF4	NC_056080.1:113943833-113981178	2.24873	4.43008	-0.890927	0.0395978	0.553975
101119219	CGNL1	NC_056060.1:50879746-51052550	2.20858	4.80986	-1.05893	0.0396262	0.553975
101111614	TANC1	NC_056055.1:150505937-150750169	16.6068	11.5604	0.646243	0.0396335	0.553975
101109260	CCDC91	NC_056056.1:186764103-187173914	23.6698	15.4465	0.79156	0.0396588	0.553975
101120458	CISD1	NC_056075.1:351877-370197	31.4323	18.4717	0.948517	0.0396879	0.553975
101111654	UBASH3B	NC_056068.1:33038807-33192966	0.603068	1.23307	-0.934609	0.0396942	0.553975
101112844	HSPA8	NC_056068.1:33419742-33424175	170.303	112.932	0.731053	0.0397441	0.554216
101119822	KCTD8	NC_056059.1:63537572-63821688	0.0841583	0.0118507	3.036	0.0397556	0.554216
101106409	BAAT	NC_056055.1:21823533-21838896	0.927677	0.233552	1.96478	0.0398216	0.554267
101121444	LAMA5	NC_056066.1:54583061-54634489	2.85924	5.20578	-0.725083	0.0398285	0.554267
101107461	DPEP1	NC_056067.1:14083253-14089202	0.0119123	0.275903	-4.23423	0.0398476	0.554267
780452	YWHAZ	NC_056062.1:76344800-76378668	32.4831	20.009	0.871417	0.0398741	0.55433
101105161	LOC101105161	NC_056060.1:2142429-2175276	9.22278	14.4294	-1.33098	0.039913	0.554564
101108285	ATP5MC3	NC_056055.1:134921550-134924640	157.929	98.2375	0.859536	0.0400287	0.555543
101105412	LOC101105412	NC_056059.1:117969869-117985023	0.057621	0	8.33648	0.040094	0.555543
101111395	NDUFS6	NC_056069.1:70901068-70919341	110.616	57.2225	1.07481	0.0400962	0.555543
101102555	ASAP2	NC_056056.1:18632187-18787998	3.80577	6.7662	-0.689708	0.0401477	0.555543
101108484	NDUFA11	NC_056058.1:16319338-16324461	50.4234	30.6537	0.895177	0.0401524	0.555543
101111187	STEAP4	NC_056057.1:73988553-74013977	4.36015	9.16923	-0.905524	0.0403283	0.555701
101117647	C2H8orf74	NC_056055.1:104579893-104608691	0.026148	0	8.32662	0.0403454	0.555701
101107761	LOC101107761	NC_056054.1:267223740-267265040	5.12898	3.07024	0.928101	0.0403473	0.555701
443179	GCG	NC_056055.1:147685843-147695734	0.0338227	0	6.93265	0.0403508	0.555701
101105675	CD34	NC_056065.1:74894801-74918230	33.7341	62.9434	-0.817699	0.0403604	0.555701
101105775	TIMM10	NC_056068.1:79601378-79604468	46.2326	25.1935	1.01581	0.0403635	0.555701
101120207	LOC101120207	NC_056054.1:99857809-99994847	1.72806	18.1268	-3.22955	0.0403711	0.555701
101121559	BLOC1S2	NC_056075.1:20949062-20957750	38.7403	23.7561	0.882031	0.040395	0.555725
101111175	OTOF	NC_056056.1:33619825-33709755	0	0.0100713	-8.47003	0.0405184	0.556507
101109937	NMNAT3	NC_056054.1:250012535-250135200	0.86907	0.381852	1.29046	0.0405631	0.556816
XLOC_058935	XLOC_058935	NC_056060.1:48035242-48231342	1.30608	3.05987	-1.48971	0.0406855	0.558192
101121781	IL22RA2	NC_056061.1:62351592-62368807	0.00499467	0.094879	-4.16529	0.0407978	0.558983
101115767	PHF19	NC_056055.1:2686496-2709134	2.45683	5.26027	-0.996916	0.04081	0.558983
101102510	SESN3	NC_056068.1:14826047-14907461	123.801	84.561	0.706274	0.0408596	0.559358
101115299	ATP5F1C	NC_056066.1:12207073-12220422	193.91	115.367	0.818284	0.0409323	0.559671
100145872	CHCHD3	NC_056057.1:98155116-98437884	37.8897	25.3238	0.747249	0.0409486	0.559671
101123330	FLNB	NC_056072.1:43246884-43386129	29.6351	50.5671	-0.679429	0.0412223	0.562882
101114711	C9H8orf34	NC_056062.1:45365983-45702129	0.25798	0.138034	1.09256	0.0414966	0.564294
101110188	PSMB2	NC_056054.1:10576686-10611147	60.2316	39.9606	0.744572	0.0415042	0.564294
101106115	THUMPD3	NC_056072.1:17192714-17216581	14.5396	9.48711	0.77961	0.0415124	0.564294
101114565	KLHL31	NC_056073.1:7000810-7021785	21.1628	11.1962	1.12724	0.0415554	0.564515
101121762	LOC101121762	NC_056056.1:205879477-205900975	1.4072	3.75938	-1.35574	0.0416989	0.565248
101113556	NUPR1	NC_056077.1:26595360-26596726	102.979	193.218	-0.820188	0.0417244	0.565248
101102738	RAB32	NC_056061.1:71046847-71072833	13.5485	7.90448	0.843769	0.0419331	0.566639
443025	CRHR1	NC_056064.1:45529988-45583312	0	0.005884	-6.90956	0.0419767	0.566756
101117264	PPP2R5A	NC_056065.1:70662441-70731290	104.727	73.2846	0.651903	0.0421819	0.569082
105605886	LOC105605886	NC_056067.1:59251576-59298366	12.4248	21.8502	-0.718086	0.0422429	0.569135
101104684	DNAJB13	NC_056068.1:52109925-52122494	0	0.0240687	-6.85607	0.0422485	0.569135
101103907	ST6GALNAC2	NC_056064.1:54513820-54531695	4.63884	9.33755	-1.1184	0.0422539	0.569135
101121099	MDGA2	NC_056060.1:38124642-39050036	0.918385	0.505496	1.05531	0.0423288	0.569839
101108797	LOC101108797	NC_056077.1:762122-762890	34.3001	4.55361	2.87937	0.0425159	0.572051
101106393	ALAD	NC_056055.1:10310709-10320689	40.6457	25.0158	0.844916	0.0425596	0.572332
100192317	MMP7	NC_056068.1:5832863-5840859	0	0.109184	-8.41361	0.0426403	0.57311
101106024	LOC101106024	NC_056064.1:50009803-50052134	0.222697	0.016521	3.83728	0.0426723	0.573233
101112250	KLK10	NC_056067.1:56723852-56728735	0.0391083	0.469945	-3.43087	0.0426972	0.573261
101117580	BCL2L13	NC_056056.1:214917326-214965338	59.8377	36.3765	0.804219	0.0427753	0.573615
100294652	AKT1	NC_056071.1:66960226-66981224	50.7376	35.1877	0.653544	0.0427921	0.573615
100820756	SRD5A2	NC_056056.1:92129150-92179796	0.0161943	0	8.25293	0.042829	0.573803
101113058	DOCK4	NC_056057.1:57734944-58206870	5.05939	8.72687	-0.686681	0.0429284	0.574784
101103431	TFAP2B	NC_056073.1:23042587-23071563	0.003388	0.061934	-3.72999	0.0429709	0.574784
101117936	STARD9	NC_056060.1:36129420-36243252	8.25467	14.2935	-0.691911	0.0430163	0.574863
114118341	LOC114118341	NC_056068.1:82133636-82173070	0.451883	0.123551	2.01767	0.0430335	0.574863
106991148	ASB10	NC_056057.1:115366687-115383876	0.392942	0.0161003	3.6409	0.0430611	0.574863
114110673	LOC114110673	NC_056077.1:758597-759365	44.5961	7.44069	2.55761	0.0430912	0.574863
101103328	BAALC	NC_056062.1:74206092-74305769	0.679394	1.39258	-0.938892	0.0432239	0.575503
101111820	WNK4	NC_056064.1:42545724-42560715	0.258734	1.25796	-1.85436	0.0432283	0.575503
101110849	NOXRED1	NC_056060.1:86759640-86779471	0	0.0147837	-6.84059	0.043253	0.575503
101104823	NDUFA13	NC_056058.1:3621761-3629939	136.036	85.6538	0.837001	0.0432539	0.575503
101117459	LRRC7	NC_056054.1:45333003-45954102	1.67008	0.863839	1.1505	0.0434439	0.576809
101118435	KCNH3	NC_056056.1:136692738-136711841	0.036473	0.225574	-2.45384	0.04356	0.578045
101108428	LOC101108428	NC_056072.1:48089798-48143813	18.9996	12.3694	0.772425	0.0437357	0.579232
554323	TGFB3	NC_056060.1:85410493-85434978	8.25739	3.71862	1.18221	0.0437366	0.579232
105605821	LOC105605821	NC_056056.1:799203-812337	0.407801	1.60236	-2.10479	0.0437418	0.579232
101121952	UCHL5	NC_056065.1:11388170-11435322	28.7104	19.8079	0.690318	0.0438295	0.580088
780456	ACSS1	NC_056066.1:42186021-42230080	21.2209	13.2837	0.858555	0.0438574	0.580151
101119906	TDP1	NC_056060.1:99676635-99749361	0.990031	1.95482	-0.868386	0.0440543	0.582143
101122393	NDUFA10	NC_056054.1:1697189-1735956	56.3328	34.5968	0.886819	0.0440868	0.582266
101112958	HPGD	NC_056055.1:106312275-106347451	3.82404	1.64042	1.27657	0.0441447	0.582433
101120487	FKBP9	NC_056057.1:65377760-65420918	24.5004	42.4938	-0.699105	0.0441896	0.582433
101106478	SFXN4	NC_056075.1:38840512-38857953	8.32053	4.40949	1.08957	0.0442155	0.582433
101123002	EMILIN2	NC_056076.1:37568503-37626682	11.9368	22.9152	-0.885095	0.0443019	0.583265
101114353	BSG	NC_056058.1:40882060-40888873	565.462	312.844	1.05164	0.0443629	0.583636
101107797	RIMS1	NC_056062.1:1448166-2046878	0.011782	0.0823597	-2.64109	0.0443765	0.583636
101108182	NUBP1	NC_056077.1:9963869-9981333	16.695	11.0623	0.745386	0.0444116	0.583791
101114493	COL5A2	NC_056055.1:120197168-120346145	106.59	183.024	-0.67654	0.0444543	0.584048
101118713	POLDIP2	NC_056064.1:19776808-19785218	43.5037	28.2363	0.788783	0.0444972	0.584222
101105056	BZW1	NC_056055.1:203216597-203231806	112.82	71.7714	0.825709	0.0445141	0.584222
101118788	SLC30A9	NC_056059.1:61563489-61644058	20.7534	14.4688	0.665144	0.0445656	0.584592
101106326	LOC101106326	NC_056058.1:15051217-15117014	0.0603997	0.358457	-2.36124	0.0445929	0.584645
101111352	FAM131C	NC_056055.1:249727202-249734142	0	0.0455587	-6.90429	0.04469	0.585612
101114222	FOXRED1	NC_056074.1:27076716-27084610	9.34244	4.88568	1.11911	0.0447446	0.585777
101106191	GPR158	NC_056066.1:25330133-25633683	0.205234	0.067997	1.62262	0.0448928	0.586654
114112239	LOC114112239	NC_056055.1:249927753-249944784	0.088732	0.448247	-2.18297	0.0448968	0.586654
101108008	NDUFB5	NC_056054.1:208280242-208295660	43.8749	28.6775	0.782507	0.0449097	0.586654
101121993	LOC101121993	NC_056054.1:239638882-239682659	0.004747	0.323853	-6.12696	0.0449882	0.586764
101102012	SGTB	NC_056069.1:13965801-14015227	2.70874	1.62888	0.896665	0.0450162	0.586823
101107880	KRT9	NC_056064.1:41516976-41523079	0.076661	0.941156	-3.38593	0.0450462	0.58691
101121523	RTRAF	NC_056060.1:43084284-43100043	129.887	88.9501	0.699342	0.0452315	0.588103
101105817	ARHGEF5	NC_056057.1:108776036-108806041	0.408509	0.0835317	2.29663	0.045296	0.588332
443425	TRHR	NC_056062.1:68229134-68274956	0.015494	0	8.34952	0.0453832	0.58905
101121385	LOC101121385	NC_056054.1:85691465-85775392	0	0.009925	-8.32029	0.0453982	0.58905
101112599	GAL3ST1	NC_056070.1:69492161-69509284	0	0.018849	-6.76174	0.0455635	0.590585
114118901	LOC114118901	NC_056070.1:72140469-72144349	0.0762857	0	6.79624	0.045603	0.590791
105610127	LOC105610127	NC_056077.1:38663964-38680540	5.3374	3.17366	0.895574	0.0457315	0.59215
105603087	LOC105603087	NC_056071.1:19100249-19107958	0.0225967	0.249249	-3.127	0.0458355	0.592632
101118180	NPSR1	NC_056057.1:63738667-63891808	0	0.00898867	-8.30805	0.0458659	0.592632
101108778	LOC101108778	NC_056070.1:68898338-68900398	377.965	219.932	0.970184	0.045881	0.592632
101102876	HNMT	NC_056055.1:172624974-172668360	5.35108	10.3793	-0.811011	0.045915	0.592693
101122496	LOC101122496	NC_056054.1:143634762-143734838	1.90812	0.736956	1.38148	0.0460048	0.593256
101109461	NUFIP2	NC_056064.1:20533412-20565904	9.95068	4.55806	1.10514	0.0461434	0.594724
101115872	CALR3	NC_056058.1:6298970-6325921	1.74031	0.732661	1.43046	0.0461904	0.594873
101123174	DNAJA3	NC_056077.1:4142022-4172926	21.0048	14.2555	0.73354	0.0462143	0.594873
101105403	PTPA	NC_056056.1:7315020-7348790	28.015	18.8686	0.717478	0.0462577	0.594873
101121124	KLHL25	NC_056071.1:15966508-16016796	29.7354	19.7246	0.7481	0.0462734	0.594873
101119650	KHDRBS3	NC_056062.1:19450106-19611297	3.30636	1.60424	1.0729	0.046314	0.59509
101106720	LOC101106720	NC_056073.1:24810314-24832457	0.362728	0.053109	2.91959	0.046485	0.595248
105614372	ERICH4	NC_056067.1:50202634-50220390	1.82144	6.76593	-1.82374	0.0464978	0.595248
XLOC_073225	XLOC_073225	NC_056063.1:56047981-56270425	0.868454	3.03027	-1.49611	0.0465575	0.595248
101119721	LOC101119721	NC_056058.1:41647470-41650377	116.166	73.8405	0.824131	0.0465776	0.595248
101119880	HSD17B10	NC_056080.1:51308751-51311080	215.688	138.318	0.816085	0.0465873	0.595248
101115040	DECR1	NC_056062.1:86594921-86635751	85.5114	46.9034	1.06314	0.0465966	0.595248
101116785	TAGLN2	NC_056054.1:110937893-110945455	40.056	71.5195	-0.769982	0.0466108	0.595248
101117418	WWC1	NC_056058.1:77913658-78069849	1.16813	2.15326	-0.79281	0.0466369	0.595279
101113026	PMVK	NC_056054.1:105095901-105155085	12.2099	6.87457	0.795205	0.0467145	0.595902
101110906	CDC14B	NC_056055.1:29550311-29679640	5.5877	11.1831	-0.916905	0.0467332	0.595902
101109586	GALNT17	NC_056077.1:29619831-30047792	0.035134	0.10759	-1.50536	0.0467587	0.595924
101103518	ASB18	NC_056054.1:4922283-4999663	0.008969	0	8.3082	0.0469811	0.598455
101111845	RXRG	NC_056054.1:117393889-117446641	21.6142	14.3698	0.732008	0.0470489	0.599015
101115573	NIM1K	NC_056069.1:31575652-31651805	0.0223817	0.154034	-2.72598	0.0470977	0.599032
101114801	TMEM147	NC_056067.1:45493922-45495793	103.23	62.6956	0.891523	0.0471105	0.599032
101121958	RAB5IF	NC_056066.1:65689219-65696391	59.8011	38.0373	0.821172	0.0471218	0.599032
101112533	GPRC5B	NC_056077.1:17940705-17962040	13.1648	23.2444	-0.71847	0.0471595	0.599207
101116076	LOC101116076	NC_056066.1:64562264-64655796	25.4058	16.3358	0.811576	0.047278	0.600409
101118647	LOC101118647	NC_056073.1:7958544-7984464	71.9332	46.819	0.786033	0.0473317	0.600787
101105406	SMDT1	NC_056056.1:218898450-218901841	80.1562	50.454	0.828444	0.0474301	0.601428
101116877	GOLGA7B	NC_056075.1:18824184-18837505	0.25985	1.14245	-1.98444	0.0474543	0.601431
101110875	TBX3	NC_056070.1:60162178-60176145	9.63099	6.07007	0.791261	0.0475764	0.60189
101120277	CCDC33	NC_056071.1:32002119-32026903	0.003714	0.0717823	-4.20955	0.0475821	0.60189
100145866	VDAC1	NC_056058.1:43298653-43333222	98.251	65.8282	0.750543	0.0477282	0.602918
101109965	LONP1	NC_056058.1:16430039-16448548	30.6209	20.3463	0.753824	0.0477487	0.602918
101107107	LAPTM4B	NC_056062.1:79270195-79336099	36.4189	24.0524	0.688365	0.047759	0.602918
101104361	APOD	NC_056054.1:192885544-192898072	100.079	44.1698	1.37441	0.0477637	0.602918
100034666	TYRP1	NC_056055.1:81182553-81201184	0.014428	0	6.74169	0.047799	0.60306
101103462	MGST1	NC_056056.1:199108271-199129893	731.128	459.692	0.840869	0.0479156	0.604136
101116104	OLFM3	NC_056054.1:79156193-79379204	0.00322267	0	8.27999	0.0479499	0.604136
100885759	ZFP91	NC_056068.1:80654819-80691799	29.2388	19.6203	0.735766	0.0479564	0.604136
101120397	GREB1	NC_056056.1:20439410-20568243	2.32764	0.880594	1.46899	0.0480005	0.604388
101107225	GAS2L1	NC_056070.1:68594693-68600099	22.8305	13.1758	0.97622	0.0480532	0.604748
106991730	KIF26A	NC_056071.1:66388080-66426294	2.42874	4.45571	-0.777106	0.0481385	0.605518
105616092	LOC105616092	NC_056062.1:82817171-82828338	2.35647	0.985702	1.42042	0.0483772	0.607423
105611964	ASMTL	NC_056080.1:6614748-6634760	19.0221	13.1352	0.685958	0.0484458	0.607423
101121538	LOC101121538	NC_056067.1:45683050-45692199	261.169	167.639	0.809609	0.0484771	0.607423
101105082	RWDD1	NC_056061.1:21361621-21378997	38.6393	26.2949	0.719563	0.048492	0.607423
101120418	CCN4	NC_056062.1:21233845-21265034	0.564394	0.148596	2.00762	0.0485566	0.607423
101111467	GAS7	NC_056064.1:28851887-29056282	7.02805	13.0468	-0.826617	0.0485614	0.607423
101104636	CMC4	NC_056080.1:81512381-81524335	5.35238	2.72096	1.15382	0.0485635	0.607423
101117692	HPN	NC_056067.1:45069132-45088894	0.077792	0.993232	-3.51463	0.0485748	0.607423
101121880	MICAL2	NC_056068.1:40125898-40366809	2.43148	1.63013	0.680488	0.0486788	0.607715
101117556	CCL24	NC_056077.1:34512873-34516131	5.74761	16.0331	-1.36851	0.0487174	0.607715
443514	SLC1A1	NC_056055.1:72836269-72910910	0.0617973	0.268389	-2.00677	0.0487286	0.607715
101104586	CD79B	NC_056064.1:47862992-47866508	0.14362	0.971699	-2.53707	0.0487489	0.607715
101114090	PREB	NC_056056.1:34183678-34214617	26.3711	17.4892	0.778703	0.0489629	0.609778
101102834	DRC7	NC_056067.1:25270275-25291656	0.01196	0	6.65901	0.0490193	0.60984
101122237	TMEM50B	NC_056054.1:122694849-122737339	21.9835	14.8884	0.727604	0.0490216	0.60984
101106508	TGFA	NC_056056.1:92500770-92612721	0.070327	0.227778	-1.63056	0.0490502	0.60984
101117321	ST8SIA1	NC_056056.1:193435675-193615960	0.0190187	0.0790847	-1.96034	0.049065	0.60984
101104681	CMTM4	NC_056067.1:33941276-34011674	1.90555	1.19006	0.794889	0.0491421	0.610495
121817883	LOC121817883	NC_056077.1:343522-355241	0.020205	0	6.75616	0.0493987	0.612891
101112581	URAD	NC_056063.1:32347298-32356299	0.0548223	0	5.85251	0.0495489	0.61383
101118445	CELF5	NC_056058.1:18360748-18411130	0	0.00545833	-6.65848	0.0495572	0.61383
101110290	MRAS	NC_056054.1:251356048-251423365	23.4993	15.4153	0.780949	0.0495996	0.61385
101119364	USP54	NC_056078.1:28696256-28824382	0.676494	1.81154	-1.02335	0.0496077	0.61385
101112822	LOC101112822	NC_056060.1:24567515-24569156	41.4913	92.5896	-1.07474	0.0496513	0.614086
101114847	LOC101114847	NC_056055.1:241358644-241400612	0.0882103	0.355954	-1.86128	0.0497521	0.61503
101118347	FBLN7	NC_056056.1:106222209-106279873	5.87754	2.6773	1.14758	0.0499271	0.615946
101120193	MRPS36	NC_056069.1:10577728-10586814	23.1086	14.2401	0.876491	0.0499851	0.615946
101120455	LOC101120455	NC_056054.1:99930277-99936850	25.7079	16.0134	0.839776	0.0500411	0.615946
101102025	ATP6V1A	NC_056054.1:179372685-179436004	36.2499	24.9462	0.672293	0.0500664	0.615946
101121631	NTRK3	NC_056071.1:18225059-18652111	0.0733603	0.160482	-1.01832	0.0500905	0.615946
101117071	KANK2	NC_056058.1:13429114-13455347	15.4546	26.4991	-0.68491	0.0500941	0.615946
101108017	CHCHD2	NC_056077.1:28266135-28323435	109.406	72.1482	0.80795	0.0500961	0.615946
101122490	THAP4	NC_056054.1:288160-323379	18.038	11.2566	0.864865	0.0502291	0.616795
101116193	LOC101116193	NC_056054.1:236997557-237170546	0.00723233	0.0764477	-3.16776	0.0502533	0.616795
121818623	LOC121818623	NC_056054.1:107440058-107457908	0.0363953	0	8.22184	0.0502634	0.616795
100305130	ATP5PO	NC_056054.1:122293924-122300869	223.664	147.993	0.765006	0.0503131	0.616902
101106812	ST3GAL6	NC_056054.1:163906756-164048292	4.00193	5.67961	-0.814858	0.0503212	0.616902
100307044	FHL1	NC_056080.1:99017215-99081587	168.064	338.61	-0.945184	0.050449	0.617478
101105856	WHAMM	NC_056071.1:22401521-22420138	10.7915	7.13658	0.752343	0.0504975	0.617478
101114902	LDLRAD3	NC_056068.1:65189457-65527277	6.89992	12.6315	-0.950964	0.0505476	0.617478
101106887	ARPP21	NC_056072.1:9613402-9776920	0.00641167	0.171784	-4.13204	0.0506128	0.617478
100462693	NDUFB6	NC_056055.1:101693781-101708638	116.894	75.799	0.800962	0.0506685	0.617478
101123189	C1QC	NC_056055.1:243913862-243918227	27.0636	57.1882	-1.02735	0.0506884	0.617478
101115070	PARP3	NC_056072.1:49054798-49063227	2.91445	6.60578	-1.05959	0.0506892	0.617478
101119072	NAPA	NC_056067.1:54221344-54247273	30.6301	19.3627	0.845922	0.0506901	0.617478
101114918	MBNL1	NC_056054.1:236079777-236298090	90.2406	62.3883	0.694679	0.050693	0.617478
100415773	ADAMTS1	NC_056054.1:130174835-130184286	6.83788	13.22	-0.856243	0.0506999	0.617478
101104187	MDGA1	NC_056073.1:11590936-11650745	0.046601	0.199839	-2.04915	0.0507125	0.617478
101103793	BMPR2	NC_056055.1:204655120-204800472	23.2318	16.3787	0.640828	0.0507639	0.617804
101119132	AEBP1	NC_056057.1:78851180-78860944	41.3551	19.8933	1.09743	0.050859	0.618273
101114253	NDUFA8	NC_056056.1:13731864-13749244	82.7187	54.5004	0.773286	0.0508598	0.618273
101112935	NDUFS8	NC_056074.1:41958200-41962201	75.5484	46.5316	0.855712	0.0508841	0.618273
101113169	SIRT2	NC_056067.1:47963474-47983107	32.9969	22.9397	0.670376	0.0509009	0.618273
101102428	LOC101102428	NC_056071.1:65930632-65954461	27.9785	18.9505	0.721	0.0510006	0.618803
101109130	LYRM4	NC_056073.1:48563014-48651423	16.3691	11.3547	0.67663	0.051029	0.618803
101108022	SCML2	NC_056080.1:16524745-16637430	1.49844	2.65151	-0.717291	0.051044	0.618803
101112448	SIPA1L2	NC_056078.1:4580484-4827750	4.81364	8.51424	-0.731159	0.0510547	0.618803
101111491	PXN	NC_056070.1:62702917-62745891	3.87053	6.96922	-0.763026	0.0510678	0.618803
101104899	NAT8	NC_056056.1:95588167-95590415	0	0.0621467	-5.83671	0.0511059	0.618894
101116580	SMOC2	NC_056061.1:90317869-90480302	17.0822	12.1775	0.626319	0.0511633	0.618894
101112257	LOC101112257	NC_056068.1:81663466-81673146	0	0.0267207	-6.6186	0.0511668	0.618894
101108899	EFR3B	NC_056056.1:32503742-32600350	1.98999	1.25165	0.841644	0.0511739	0.618894
101107727	POU2AF1	NC_056068.1:21327413-21353017	0.0940893	0.514001	-2.13613	0.0512363	0.619128
443309	CA1	NC_056062.1:90155047-90230044	0	0.0100157	-8.16607	0.0512426	0.619128
101117333	CCSER1	NC_056059.1:33696800-35188219	3.34043	5.52634	-0.655665	0.0513148	0.61951
100302079	RAN	NC_056070.1:46338330-46341926	119.973	78.5047	0.76218	0.0513656	0.61951
114109334	LOC114109334	NC_056072.1:56181778-56188235	0.331964	0.0518083	2.71789	0.0513694	0.61951
101123036	FSTL4	NC_056058.1:42478226-42952514	0.148023	0.0665047	1.33444	0.0513729	0.61951
101120161	ECSIT	NC_056058.1:13590334-13604099	12.9249	7.45924	0.99539	0.0514425	0.619754
101110461	FEZ1	NC_056074.1:26357363-26399323	3.5101	6.52457	-0.804681	0.0514897	0.620025
443151	EP4C	NC_056056.1:208664859-208689556	0.0334007	0.26103	-2.91684	0.0515208	0.620074
101106892	CMPK1	NC_056054.1:21860293-21895218	35.9308	25.1031	0.664017	0.051595	0.620074
101118466	ST8SIA6	NC_056066.1:31140376-31284076	0.681864	0.279562	1.30617	0.0515986	0.620074
101113759	CYTL1	NC_056059.1:104823635-104828526	0	0.0531783	-6.63678	0.051662	0.620074
101102868	TMEM44	NC_056054.1:193737722-193785477	2.29565	4.3191	-0.871858	0.0516921	0.620074
101104797	LOC101104797	NC_056054.1:227146871-227147377	77.5612	29.5802	1.54328	0.0517046	0.620074
101123672	LOC101123672	NC_056073.1:26444433-26459096	6.71923	15.9031	-1.1618	0.051716	0.620074
443027	LOC443027	NC_056066.1:36988286-37228812	0	0.003173	-8.13821	0.0517933	0.620307
101115558	BATF3	NC_056065.1:70321041-70346747	1.65613	3.74378	-1.08	0.0518643	0.620307
101107152	EBF3	NC_056075.1:48660251-48779671	8.35623	14.0569	-0.614725	0.0519102	0.620307
101117634	PSMA8	NC_056076.1:31006065-31119129	2.94344	1.92397	0.921843	0.0519136	0.620307
101118798	ALDH3A2	NC_056064.1:33676659-33690866	62.2885	44.1658	0.64261	0.0519246	0.620307
105608827	LOC105608827	NC_056067.1:47067792-47072850	4.59412	14.0348	-1.54111	0.0519283	0.620307
101114952	TNFAIP8	NC_056058.1:32199991-32343030	20.9105	14.9391	0.629953	0.0519579	0.620307
101119613	PHF24	NC_056055.1:53470563-53493768	0.00593833	0.13522	-4.15549	0.0521563	0.621589
101108454	TIMM17B	NC_056080.1:56178694-56182653	23.0723	13.4881	0.945207	0.0521643	0.621589
101104857	SHISAL2B	NC_056069.1:14871330-14893625	0	0.0339443	-8.12509	0.0522825	0.622597
101115889	TFB2M	NC_056065.1:30067593-30084990	7.62451	4.29212	1.02296	0.0522984	0.622597
101116509	MAP1B	NC_056069.1:9521528-9614730	39.836	27.0784	0.656648	0.0524033	0.623119
101121878	IGLON5	NC_056067.1:57470409-57486385	0	0.0152367	-6.59593	0.0524349	0.623119
101105139	LOC101105139	NC_056055.1:18527019-18532458	0.0394447	0	6.59185	0.0524415	0.623119
114108725	LOC114108725	NC_056061.1:74232152-74410561	5.17395	23.4422	-1.96525	0.0524972	0.623485
101106977	LOC101106977	NC_056074.1:12111345-12148027	1.41091	0.488229	1.66411	0.052545	0.623758
101114719	PRELID3B	NC_056066.1:57032462-57041913	20.8011	13.2021	0.848333	0.0526096	0.624102
101120355	MMP1	NC_056068.1:5527877-5536946	0.0242967	0	6.68058	0.0526921	0.624102
101115484	DRG1	NC_056070.1:70075828-70089960	22.446	15.3302	0.703806	0.0527106	0.624102
101119682	DEUP1	NC_056074.1:999477-1127721	0	0.00570233	-8.12479	0.0528707	0.624102
101122297	OVOL2	NC_056066.1:37863266-37888151	0	0.0287683	-8.13519	0.0528812	0.624102
101106318	ATP5F1B	NC_056056.1:163010527-163016197	289.129	193.753	0.744462	0.0528817	0.624102
101119262	MRS2	NC_056073.1:32322980-32357064	11.8873	7.60444	0.813984	0.0528903	0.624102
101118487	CTH	NC_056054.1:46195052-46218159	2.14897	1.02073	1.26827	0.0529908	0.624102
100381246	RGS4	NC_056054.1:114721185-114726000	2.28363	7.07445	-1.53796	0.0529999	0.624102
101104196	SLC9A9	NC_056054.1:245697294-246350207	5.60254	9.60094	-0.67464	0.0530174	0.624102
101122607	EMC2	NC_056062.1:68890003-68947496	44.8307	30.7141	0.688557	0.0530233	0.624102
101119925	VAT1L	NC_056067.1:4512232-4682091	0.287825	0.0832933	1.99689	0.0530323	0.624102
101120259	DNAJC11	NC_056065.1:46061079-46129630	12.9344	8.76361	0.728624	0.0530334	0.624102
101105613	VWA5A	NC_056074.1:24494530-24524344	22.6691	11.5098	1.02396	0.0531456	0.624102
100294605	VCAN	NC_056058.1:80902349-81022166	10.7875	25.2255	-1.21187	0.0531657	0.624102
105602862	ZNF664	NC_056070.1:51746352-51782235	33.4005	22.0819	0.719294	0.0531873	0.624102
101106859	DHRS12	NC_056063.1:21520325-21563124	16.3315	10.9947	0.687239	0.0532767	0.624102
101109924	RNF11	NC_056054.1:25685707-25722989	51.0755	36.0443	0.646771	0.0532936	0.624102
101104540	NGF	NC_056054.1:92653624-92709627	0.290034	0.857662	-1.41077	0.0533019	0.624102
101103806	MARCHF2	NC_056058.1:14782324-14796585	41.438	27.9979	0.720703	0.05332	0.624102
105601873	LOC105601873	NC_056064.1:35321101-35327140	68.7173	47.1779	0.682105	0.0533248	0.624102
101108710	RBP2	NC_056054.1:250222554-250255181	0.0188893	0	8.1457	0.0533305	0.624102
101111872	DESI1	NC_056056.1:218506456-218527535	8.03043	5.12795	0.806832	0.0533523	0.624102
101103930	APOBEC2	NC_056073.1:15013770-15027564	0.006016	0.0992777	-4.00113	0.0533694	0.624102
106990110	TMED2	NC_056070.1:52122573-52132148	99.8456	69.6892	0.670629	0.0534078	0.62418
101109518	GPC4	NC_056080.1:101468558-101575222	1.41592	2.52091	-0.737492	0.0534258	0.62418
101113160	LSM12	NC_056064.1:43623225-43645454	9.44812	6.21105	0.768948	0.0535028	0.624205
101114572	BCL9	NC_056054.1:98594859-98690567	0.97456	1.95689	-0.907125	0.0535637	0.624205
101120658	RELN	NC_056057.1:46157799-46693920	2.05682	3.95856	-0.88855	0.0535856	0.624205
101123573	NAA20	NC_056066.1:39145398-39162438	38.2971	26.4313	0.689121	0.0536488	0.624205
101114535	LOC101114535	NC_056064.1:14083554-14085546	2.54745	0.505078	2.35457	0.0538925	0.625909
101110465	SLC6A17	NC_056054.1:87461817-87517655	0.752477	0.20185	1.87176	0.053909	0.625909
101104124	USP9X	NC_056080.1:40361159-40473502	35.2344	25.1603	0.614599	0.0539621	0.625909
101105323	AGR2	NC_056057.1:26274407-26287467	0	0.063075	-8.0927	0.0539797	0.625909
101118876	ABLIM2	NC_056059.1:115013193-115180061	0.62092	1.2463	-0.782104	0.0539976	0.625909
101119619	SHROOM2	NC_056080.1:232494-380473	0.568285	1.29848	-0.993868	0.0540433	0.626147
101122167	CBR4	NC_056055.1:111953190-111973087	25.8207	15.8168	0.880591	0.0540681	0.626147
101113966	CAPN11	NC_056073.1:17677743-17690120	0.01706	0	6.54537	0.0541354	0.626638
101107154	SLC5A11	NC_056077.1:23049330-23106884	0.0112497	0	7.9075	0.0542267	0.626885
101113030	ATP5PF	NC_056054.1:131264344-131310343	122.389	77.6532	0.754017	0.0542442	0.626885
101103016	NPAS3	NC_056071.1:41068303-42048774	1.73944	3.50044	-0.897774	0.0542544	0.626885
105606344	HRK	NC_056070.1:58193159-58216924	1.35464	0.497604	1.6338	0.0543232	0.627222
101101949	VGLL3	NC_056054.1:156102406-156168110	25.346	13.0933	1.15969	0.0543358	0.627222
101106971	BTBD6	NC_056071.1:67292898-67349980	16.2113	11.0647	0.692684	0.0544115	0.627643
101122177	EPHA8	NC_056055.1:243957793-243989786	0	0.00740867	-6.55732	0.0544222	0.627643
101111572	PSMD8	NC_056067.1:47563928-47570039	62.5424	42.8463	0.698145	0.0544569	0.627754
101121698	SLC4A11	NC_056066.1:51684111-51695398	0.280889	1.1202	-1.95158	0.0545457	0.628489
101116995	RSPO3	NC_056061.1:11351810-11446472	15.6861	9.35506	0.899894	0.0545961	0.628781
101109975	LOC101109975	NC_056061.1:83097636-83107148	0.706388	2.2484	-1.57289	0.0547141	0.629391
121820604	LOC121820604	NC_056064.1:37577535-37598726	0.0185843	0.252896	-3.179	0.0547177	0.629391
443135	PTHLH	NC_056056.1:187447672-187459852	0.195899	0.948979	-2.12949	0.0547743	0.629391
101117808	ADD3	NC_056075.1:30116499-30246052	52.2823	95.7498	-0.760307	0.0548954	0.629917
101119674	TTC28	NC_056070.1:67580374-68149139	3.87304	6.43334	-0.618856	0.0549771	0.630567
101103692	POLR3E	NC_056077.1:20519060-20550455	9.00743	6.0525	0.761772	0.0550311	0.630614
101116450	TOMM20	NC_056078.1:7254919-7268804	62.8179	43.7112	0.679803	0.0550463	0.630614
101119164	COQ5	NC_056070.1:62931208-62946055	28.3501	19.1586	0.725431	0.0551015	0.630614
101121122	TANGO2	NC_056070.1:72979097-73004818	25.4288	15.8866	0.816855	0.055122	0.630614
101102085	LOC101102085	NC_056067.1:57691439-57743767	4.21048	1.79338	1.32745	0.055132	0.630614
101110936	SGCD	NC_056058.1:64679852-65738774	15.9249	10.4047	0.764578	0.055192	0.631013
101116668	TNFRSF25	NC_056065.1:46255618-46260122	1.49303	4.51253	-1.48245	0.055219	0.631035
101108846	NPLOC4	NC_056064.1:50665246-50718444	25.425	16.9638	0.677469	0.0552837	0.631486
XLOC_012790	XLOC_012790	NC_056054.1:201064758-201131131	0.542106	1.12926	-0.91397	0.0553602	0.632073
101121158	TCEA3	NC_056055.1:243159406-243205951	23.3945	15.6027	0.759001	0.0554052	0.632233
101119064	NGFR	NC_056064.1:36825401-36844986	0.18574	0.703853	-1.80085	0.0554498	0.632233
101110621	SPRING1	NC_056070.1:58281999-58310547	20.4704	11.3131	1.02414	0.0554915	0.632421
101109702	MICOS13	NC_056058.1:16456799-16458431	79.3828	43.3847	1.05168	0.0555304	0.632578
101116260	AEN	NC_056071.1:18978688-18990280	7.09416	3.53491	1.18721	0.055604	0.632714
101111093	PGLS	NC_056058.1:5363386-5371301	25.8979	17.0081	0.749686	0.0556192	0.632714
101123641	KLF5	NC_056063.1:48406113-48425297	0.670861	1.7979	-1.29325	0.055648	0.632714
114117287	LOC114117287	NC_056065.1:13444149-13444978	0.496935	0.0234233	3.948	0.0556754	0.632714
101106774	SEPTIN11	NC_056059.1:92514677-92663519	54.954	38.2785	0.617503	0.0557078	0.632714
100270717	SOD1	NC_056054.1:124519639-124528314	424.5	299.448	0.62814	0.0557674	0.632714
443020	PR	NC_056069.1:39248092-39250921	0.078578	0	6.52857	0.0557691	0.632714
105603144	NRG4	NC_056071.1:28995251-29139276	3.05389	1.52532	1.21087	0.0558553	0.633405
105613643	HHLA2	NC_056054.1:173996177-174148035	0.630605	0.17331	1.45283	0.0560018	0.634186
101117080	STON2	NC_056060.1:90727435-90903859	4.00473	7.40905	-0.865035	0.0560271	0.634186
101122254	HSPD1	NC_056055.1:199784621-199794453	91.1861	61.4455	0.717038	0.0561798	0.635077
101119742	TNFRSF9	NC_056065.1:44799276-44820991	1.67981	0.581021	1.71783	0.0562926	0.635494
101120930	LLGL1	NC_056064.1:34147201-34162017	4.37723	8.37879	-0.834871	0.0563453	0.635803
101106573	KIAA1210	NC_056080.1:115348323-115397477	0.00372833	0.062634	-3.84559	0.0563988	0.636121
101105896	IMMT	NC_056056.1:58056002-58094887	26.9487	18.2947	0.729434	0.0565305	0.637124
101111341	ZDHHC2	NC_056079.1:19192940-19259296	182.048	120.646	0.765276	0.0565446	0.637124
101120562	ASIC1	NC_056056.1:136228865-136253898	0.010114	0	6.56619	0.0565893	0.637124
101106437	NT5DC1	NC_056061.1:21684358-21800926	6.11188	3.99952	0.786314	0.0566667	0.637489
101109258	C3H12orf50	NC_056056.1:124300629-124327550	0	0.0252733	-7.97223	0.0567968	0.638393
101120342	TMEM256	NC_056064.1:26974337-26975493	177.268	113.288	0.794453	0.0568111	0.638393
106991827	LOC106991827	NC_056074.1:46563418-46578801	34.9763	25.4639	0.688161	0.0568679	0.638441
101105217	GRB14	NC_056055.1:144980044-145105690	1.11693	0.303101	2.00304	0.0570154	0.638702
101115034	DUOXA1	NC_056060.1:63417774-63428554	0	0.0217467	-6.53869	0.0570492	0.638702
101107020	TMEM232	NC_056058.1:106940818-107215514	0.162189	0.65937	-1.27067	0.0571503	0.638702
101105605	AP3B2	NC_056071.1:22286423-22323375	0.01533	0	7.81898	0.0571831	0.638702
101115175	LOC101115175	NC_056077.1:2263555-2264760	17.8537	6.80869	1.5824	0.0571873	0.638702
101104843	LOC101104843	NC_056065.1:50274482-50315131	34.5601	23.7526	0.750197	0.0572709	0.639031
101119960	HECW2	NC_056055.1:198456110-198907550	2.78731	4.66242	-0.623928	0.0572931	0.639031
101105172	RAMP2	NC_056064.1:42534552-42536332	26.2	52.481	-0.897514	0.0573539	0.639425
101117188	TIMM50	NC_056067.1:48517780-48525081	24.077	15.8112	0.758908	0.0573814	0.639447
121818707	LOC121818707	NC_056055.1:139407835-139442170	0	0.0191037	-7.97799	0.057469	0.639933
101121977	ATG7	NC_056072.1:55260445-55528386	18.6058	13.5963	0.662416	0.057476	0.639933
101114249	LOC101114249	NC_056055.1:111379162-111403233	8.92068	6.07037	0.687666	0.0576151	0.640952
101111244	CNDP2	NC_056076.1:4187213-4200857	28.7488	20.1421	0.674795	0.0576382	0.640952
114110667	LOC114110667	NC_056077.1:197828-453643	0.00219033	0	8.01482	0.0576527	0.640952
101118388	CFL2	NC_056071.1:42850674-42862341	38.1395	19.7146	0.966035	0.0577074	0.640964
101108169	FAM3D	NC_056072.1:42783545-42833795	0.00667633	0	6.35432	0.057744	0.640964
101123468	PSMB5	NC_056060.1:21639487-21644701	73.1374	49.1288	0.730607	0.0577728	0.640964
101110965	DLAT	NC_056068.1:22028592-22060302	13.602	9.06914	0.755003	0.0579285	0.64184
101103890	MEI1	NC_056056.1:218588810-218682207	1.19115	2.36996	-1.0067	0.0580717	0.643143
114116932	LOC114116932	NC_056064.1:8734842-8737749	2.63645	8.79709	-1.59128	0.0581402	0.643305
121820666	CPSF4L	NC_056064.1:57270649-57278302	0	0.031313	-6.51909	0.0582144	0.643305
101123486	SYCP2	NC_056066.1:56317694-56379501	0.203198	0.526274	-1.24361	0.0582736	0.643447
105607321	LOC105607321	NC_056059.1:103364854-103395989	0	0.00728533	-6.45549	0.0582785	0.643447
121819698	LOC121819698	NC_056058.1:66144564-66176555	0.0184897	0	7.77687	0.0584865	0.644912
101107692	SULT4A1	NC_056056.1:220465545-220493349	0.010864	0.0946583	-3.00894	0.0584931	0.644912
101119908	PPP1R36	NC_056060.1:74769590-74792831	5.55959	9.91886	-0.748493	0.0585111	0.644912
101114223	C1H1orf141	NC_056054.1:42767494-42816752	0	0.014306	-7.94675	0.0585396	0.644912
101104026	S100A8	NC_056054.1:103770088-103771068	137.535	39.8951	1.94294	0.0585738	0.645006
101102915	GRIN2C	NC_056064.1:55882720-55899248	0	0.00769267	-5.53207	0.0585998	0.645009
101105732	PBX3	NC_056056.1:10132793-10354745	7.18984	4.95629	0.736354	0.0588148	0.646447
101115373	SPTLC2	NC_056060.1:86838876-86938755	9.55754	15.8347	-0.623491	0.0588254	0.646447
101109455	CRISPLD1	NC_056062.1:51293613-51345056	0.760956	0.254184	1.59555	0.0588285	0.646447
101104048	NANS	NC_056055.1:49667328-49683136	18.1511	11.9728	0.723011	0.058841	0.646447
101105005	VNN1	NC_056061.1:58139248-58166116	10.5434	6.25948	0.904841	0.0588592	0.646447
101115759	ARSL	NC_056080.1:5922761-6059905	3.59099	6.65698	-0.73495	0.0589388	0.646959
101117108	CDH9	NC_056069.1:46737142-46875034	0	0.00453933	-7.94126	0.0589761	0.646959
101107453	TTC19	NC_056064.1:33209095-33238417	14.6303	10.3895	0.75999	0.0590031	0.646959
443259	PER2	NC_056054.1:3041063-3080843	3.8708	6.86901	-0.734659	0.0590551	0.646959
100526668	TTPA	NC_056062.1:41023721-41056865	33.3745	19.5394	0.832704	0.0592098	0.647655
101109658	C1H1orf185	NC_056054.1:25439956-25624422	1.04894	0.590638	1.01551	0.0592209	0.647655
101119669	MTCH2	NC_056068.1:76340120-76356091	40.9349	28.5719	0.668697	0.0592406	0.647655
101120981	DBT	NC_056054.1:77556236-77598178	39.9224	21.8023	1.08455	0.0593179	0.647655
101120469	CSGALNACT1	NC_056079.1:37227924-37564639	5.3701	10.1316	-0.857238	0.0593374	0.647655
121820332	LOC121820332	NC_056062.1:32029982-32099685	0.283909	1.03465	-1.37091	0.0594097	0.647655
101110861	LONP2	NC_056067.1:16234414-16315945	26.731	19.0258	0.645786	0.0594202	0.647655
101122965	NPHP4	NC_056065.1:46663169-46812293	0.525485	1.02827	-0.856773	0.0594623	0.647655
101118747	GOT1	NC_056075.1:20218190-20241353	9.11582	5.90565	0.79001	0.0594773	0.647655
101121907	RGS11	NC_056077.1:828382-836866	0.004345	0.0951237	-4.05175	0.0594774	0.647655
101116316	CPEB2	NC_056059.1:110823817-110900290	24.0464	15.2381	0.841625	0.0594838	0.647655
101104925	TFAP2C	NC_056066.1:59024630-59034259	0	0.0267687	-6.58582	0.0595224	0.647655
101110625	ACAA1	NC_056072.1:11608660-11633147	78.4521	50.355	0.829169	0.0595275	0.647655
101120339	RNF17	NC_056063.1:36758557-36872885	0	0.00552267	-7.91481	0.0595485	0.647655
101104604	DAB2	NC_056069.1:35183134-35240269	15.3283	26.0626	-0.619015	0.0595572	0.647655
101114461	PMFBP1	NC_056067.1:38478115-38529291	0	0.0126183	-7.89701	0.0595775	0.647655
101113046	PRUNE2	NC_056055.1:59879769-60171742	7.34104	4.19733	0.864455	0.0595883	0.647655
101123093	ASB9	NC_056080.1:13433945-13461486	0.331593	1.03451	-1.51158	0.0596876	0.648174
101113253	IGF2BP1	NC_056064.1:37242889-37289267	0	0.00487	-6.44463	0.0597237	0.648285
101102944	BTBD8	NC_056054.1:69354366-69450029	5.07275	8.72523	-0.65196	0.0597511	0.648302
101112622	FCRL4	NC_056054.1:107937622-107972444	0	0.006236	-6.45297	0.0598448	0.649039
443273	GRIA3	NC_056080.1:107219990-107531034	3.16279	1.849	0.880608	0.0599124	0.649491
101115490	NAV2	NC_056074.1:22345557-23145541	1.68953	2.65965	-0.623248	0.0600542	0.650187
101120256	RPRML	NC_056064.1:44985076-44986853	0.011523	0.232012	-4.14623	0.0600611	0.650187
100294604	SNCA	NC_056059.1:35534083-35695812	0.631946	1.35944	-1.03107	0.0600678	0.650187
101119545	LOC101119545	NC_056073.1:27140853-27148048	0.888384	0.149472	2.64548	0.0601128	0.650187
101120990	EDA	NC_056080.1:62551045-62939777	2.61053	4.704	-0.764215	0.0601367	0.650187
101105536	SLC6A11	NC_056072.1:54821864-54945658	0.0657603	0.00320667	4.50466	0.0601579	0.650187
101121825	LOC101121825	NC_056055.1:2516701-2606631	0.0543697	0.0140107	2.13019	0.0602182	0.650251
114113679	KLRF2	NC_056056.1:205568490-205587997	0	0.0326787	-7.88148	0.0602268	0.650251
101105280	FHIP1A	NC_056070.1:6273992-6580163	1.2452	0.774091	0.811211	0.0602621	0.650251
101116901	YKT6	NC_056057.1:78770189-78779490	29.8251	20.1601	0.732512	0.0602929	0.650251
101108565	TPI1	NC_056056.1:209419247-209422692	158.707	104.846	0.756389	0.0603426	0.650251
101122319	LOC101122319	NC_056054.1:178571160-178613145	2.70688	5.72272	-1.04559	0.0603636	0.650251
101113445	TXNDC12	NC_056054.1:26452118-26482711	65.8867	47.2932	0.625623	0.0603709	0.650251
100301555	APOBEC3A	NC_056056.1:216354162-216358066	0.150085	0	7.72466	0.060371	0.650251
101116755	LOC101116755	NC_056067.1:2108635-2207713	32.926	23.7853	0.609213	0.0605729	0.650962
121816231	WFDC12	NC_056066.1:73463414-73464852	0	0.147814	-6.40306	0.0606236	0.650962
100499506	IL25	NC_056060.1:21359315-21370542	0.111525	0.52864	-2.16298	0.0606308	0.650962
101107752	POLR3K	NC_056077.1:658814-661825	25.3043	14.377	0.998538	0.0606995	0.650962
101122593	NDUFA4	NC_056057.1:19908585-19915853	308.644	191.957	0.869759	0.0607029	0.650962
101108729	SDHB	NC_056055.1:249215379-249247114	103.036	63.5404	0.724911	0.060756	0.650962
105608914	INAFM2	NC_056060.1:34144874-34162275	2.45069	1.9177	1.39123	0.0607679	0.650962
101104397	GPX3	NC_056058.1:60066363-60074517	414.402	249.521	0.801639	0.0610155	0.652027
101113204	FTSJ1	NC_056080.1:56559517-56569215	2.2077	0.792254	1.52685	0.0610688	0.652027
101103249	SLC43A2	NC_056064.1:22581238-22624991	11.8862	7.08875	0.798569	0.0610857	0.652027
101103523	CCDC102B	NC_056076.1:8346709-8637982	0.277219	0.577364	-0.915581	0.0611261	0.652027
105611203	LOC105611203	NC_056058.1:49407354-49417506	0.011013	0.153275	-3.52611	0.0611379	0.652027
101119625	RUNX3	NC_056055.1:241741606-241808201	0.304541	0.745518	-1.19515	0.0611421	0.652027
101110363	BRD9	NC_056069.1:71439747-71458491	26.3073	18.9639	0.626623	0.061198	0.652027
101117042	HIP1	NC_056077.1:34330333-34463937	10.1978	17.2922	-0.631874	0.0612228	0.652027
101110915	ENTPD2	NC_056056.1:868631-874191	0.547885	2.48376	-2.12022	0.0612333	0.652027
101118195	ASPH	NC_056062.1:39960098-40147660	280.786	184.389	0.779199	0.0612746	0.652027
101105767	C12H1orf115	NC_056065.1:23403421-23415489	16.3297	28.3114	-0.668369	0.061287	0.652027
101105243	CXCL14	NC_056058.1:44698931-44707308	18.3739	43.4832	-1.08691	0.0612891	0.652027
101122010	CCDC88A	NC_056056.1:68640935-68761610	5.20687	8.7378	-0.65455	0.0613506	0.652088
101103044	ERBB4	NC_056055.1:213131025-214427234	0.027255	0.0771433	-1.48957	0.0613727	0.652088
101108795	RSRC1	NC_056054.1:229697762-230145616	25.0885	17.1242	0.705427	0.0614738	0.652498
101102157	CAMKK1	NC_056064.1:24372931-24405264	4.29629	8.5243	-0.834991	0.0615121	0.652498
114109089	TEX22	NC_056071.1:67424058-67442986	0.352409	0.932261	-2.17496	0.0615249	0.652498
101117129	LOC101117129	NC_056054.1:256287494-256332999	0.0122173	0	7.68878	0.0615765	0.652498
101106331	SPESP1	NC_056060.1:15739817-15772853	0.01582	0	7.90824	0.0615932	0.652498
101116566	MFSD12	NC_056058.1:18161561-18173141	15.2698	10.0236	0.715922	0.0616551	0.652669
101113773	SNF8	NC_056064.1:37330460-37338382	30.7251	21.3554	0.669459	0.0616784	0.652669
101119419	APLNR	NC_056068.1:79273577-79277201	2.41041	6.80618	-1.36802	0.0616945	0.652669
101118449	LGALS3	NC_056060.1:65679167-65697710	510.666	323.466	0.810097	0.0617133	0.652669
121817750	LOC121817750	NC_056076.1:25993805-26088279	0	0.00700567	-7.86555	0.0617861	0.653164
105605916	LOC105605916	NC_056063.1:71504969-71673806	1.77194	1.185	0.759226	0.0618606	0.653675
443450	BCAT2	NC_056067.1:55155036-55168365	49.9088	28.2338	1.02402	0.0619218	0.654047
101103116	ATP8B2	NC_056054.1:104581776-104603074	6.65334	11.9306	-0.763626	0.0621087	0.655119
101116299	MALL	NC_056056.1:104670929-104703686	3.40448	6.74019	-0.888488	0.0621115	0.655119
101113834	SLC16A7	NC_056056.1:159826758-160022886	67.8309	41.5486	0.88388	0.0621486	0.655119
101123339	RAB25	NC_056054.1:106090822-106097614	0	0.0880313	-7.87593	0.0621491	0.655119
101104240	TMOD2	NC_056060.1:56707330-56771966	50.4088	33.9499	0.732076	0.0621836	0.655119
101110082	ETFB	NC_056067.1:57503652-57517302	221.659	147.185	0.756564	0.062228	0.655119
101116145	HPGDS	NC_056059.1:30940942-30969820	1.04254	2.55341	-1.40522	0.0622667	0.65521
101112514	ANKRD55	NC_056069.1:23165057-23277005	0.13357	0.7123	-2.17118	0.0623218	0.655281
101110008	PKNOX2	NC_056074.1:26050912-26345389	1.69278	3.33252	-0.848214	0.0623257	0.655281
101122135	TLL1	NC_056070.1:1617414-1973666	2.7371	4.85688	-0.754361	0.0624064	0.655855
443305	SELP	NC_056065.1:36517739-36552490	3.74369	7.41919	-0.907376	0.0624392	0.655925
101106466	PACS2	NC_056071.1:67363797-67423585	22.3089	16.2651	0.610815	0.0625764	0.656848
101122229	SLC22A23	NC_056073.1:49452590-49580292	2.84632	1.72245	0.858413	0.0626181	0.656848
101106589	SPRY4	NC_056058.1:50981334-50995741	3.77799	1.76792	1.23653	0.0626303	0.656848
100170328	CALCB	NC_056068.1:37535081-37538347	0	0.0646063	-6.41072	0.0626725	0.656848
101119213	CCNG1	NC_056058.1:72690993-72698237	317.643	211.541	0.761324	0.062684	0.656848
105614945	LOC105614945	NC_056057.1:10714166-10747426	0	0.0177637	-7.83174	0.0628359	0.658117
100147791	DIRAS3	NC_056054.1:43721538-43723875	0.0238723	0.222478	-3.78231	0.0629585	0.658899
101102548	LOC101102548	NC_056055.1:203108513-203193767	6.97961	4.03627	0.89708	0.0629951	0.659007
101116184	CARMIL1	NC_056073.1:31261670-31566751	7.39264	4.51685	0.773006	0.0632444	0.660894
101114491	PLEKHA2	NC_056079.1:33092815-33175089	12.3129	21.115	-0.654328	0.0632544	0.660894
101102280	CRYM	NC_056077.1:19547756-19569907	7.6547	4.52272	0.914505	0.0633153	0.661031
101107070	REPS2	NC_056080.1:15178721-15425631	0.508889	0.947094	-0.831724	0.0633723	0.661031
101107259	LOC101107259	NC_056055.1:235928657-235942845	0.0129387	0	6.45721	0.0635725	0.662357
101103235	PRDM6	NC_056058.1:28306677-28417656	0.375397	0.247637	1.67603	0.0635791	0.662357
101103652	DPF3	NC_056060.1:82202207-82490647	2.44632	1.63507	0.76151	0.0636301	0.662561
101117625	PPARD	NC_056073.1:9430797-9519569	5.09265	3.32195	0.796099	0.0636515	0.662561
101120395	LOC101120395	NC_056054.1:66326556-66370465	3.2924	2.17553	0.738795	0.0637157	0.662955
101104118	NPTX2	NC_056077.1:37932982-37945080	0.024699	0.215252	-3.08493	0.0637452	0.662988
101104119	MYPN	NC_056078.1:23818659-23914719	0.00318633	0	6.22756	0.0638252	0.663081
101110338	FILIP1	NC_056061.1:2119158-2332846	6.71587	11.691	-0.714687	0.0638599	0.663081
101120528	LOC101120528	NC_056072.1:16352346-16366303	1.0888	2.8872	-1.30447	0.0639613	0.663859
101104108	NDUFS2	NC_056054.1:112643586-112652541	94.1645	65.4812	0.683439	0.0640508	0.664273
105605991	PLA2G2D	NC_056055.1:246269256-246314920	0	0.0529463	-6.39161	0.0640541	0.664273
101114308	PTPN11	NC_056070.1:61898762-61966377	58.2085	40.9395	0.665932	0.0640829	0.664298
101114816	ACACB	NC_056070.1:64000943-64133686	0.351136	0.806923	-1.00082	0.0642246	0.665217
XLOC_011152	XLOC_011152	NC_056054.1:141199849-141862501	3.47307	5.92162	-0.670188	0.0642668	0.66538
101114452	BCL6B	NC_056064.1:26699138-26705050	5.69335	11.8259	-0.952247	0.064459	0.666982
101105601	RNF180	NC_056069.1:15210907-15513291	2.07938	1.33057	0.655727	0.0644746	0.666982
101119601	THPO	NC_056054.1:203601876-203608126	0.00638933	0.129712	-4.04797	0.064551	0.667496
101103972	TAX1BP1	NC_056057.1:69886891-69977658	51.2301	37.5181	0.585369	0.0646002	0.667587
101107228	CAV3	NC_056072.1:17738690-17751251	0	0.045663	-7.7795	0.0647545	0.667604
100307038	CYGB	NC_056064.1:54560751-54569112	57.2831	35.2069	0.781777	0.0647689	0.667604
101115292	ABCA5	NC_056064.1:60466569-60532472	7.68272	4.82423	0.862877	0.0648102	0.667604
101113771	LOC101113771	NC_056064.1:13946762-13985385	0.203988	0.0169563	3.63053	0.0648851	0.667604
100147782	SLC25A11	NC_056064.1:26333356-26335564	38.9814	24.2387	0.839236	0.0649013	0.667604
101102750	AXL	NC_056067.1:49958877-49994988	13.6629	25.1958	-0.831772	0.0649267	0.667604
101121420	LOC101121420	NC_056058.1:42118593-42119800	280.988	174.605	0.864723	0.0649337	0.667604
114108774	LOC114108774	NC_056066.1:68732038-68733298	34.4902	14.5292	1.39569	0.0649821	0.667829
101106037	FOXA1	NC_056071.1:45500910-45507710	0	0.0828007	-7.78988	0.0650192	0.667936
101113264	LOC101113264	NC_056067.1:14287955-14312814	10.6121	6.85667	0.782768	0.0651458	0.668565
101113954	ZW10	NC_056068.1:23990785-24026717	7.98529	5.47161	0.699224	0.0651602	0.668565
101108962	DQA	NC_056073.1:25240213-25305341	7.05973	22.9904	-1.51279	0.0652231	0.668721
101108961	LOC101108961	NC_056073.1:7211096-7227094	0	0.0364513	-7.75086	0.0652287	0.668721
105603281	AHNAK2	NC_056071.1:67075677-67118407	5.33042	5.45275	-1.06355	0.0652709	0.66888
101102476	MAGI2	NC_056057.1:43952724-44782170	1.5365	1.08548	0.615425	0.0652981	0.668886
121816395	LOC121816395	NC_056067.1:64235348-64244103	0.0207047	0	6.17368	0.0653871	0.669525
101113138	LRPPRC	NC_056056.1:80305231-80404271	16.6879	12.0298	0.622481	0.0655268	0.670681
101106698	SMURF2	NC_056064.1:48455261-48572887	13.3625	21.3668	-0.600119	0.0656049	0.671206
101107489	CC2D2B	NC_056075.1:17029823-17233229	11.4779	7.4411	0.733307	0.0656315	0.671206
101104661	LOC101104661	NC_056059.1:89812716-89814737	3.86807	11.4416	-1.48394	0.0657936	0.67259
101102026	PARL	NC_056054.1:204033275-204086762	62.5855	44.6319	0.644077	0.0658761	0.673124
101118036	FSCN2	NC_056064.1:50732600-50738353	0	0.038166	-6.42821	0.0659033	0.673124
101116615	ESRRA	NC_056074.1:39054074-39062262	21.6024	12.5775	0.916037	0.0659531	0.673124
105611516	LOC105611516	NC_056059.1:72992484-73018074	14.5029	7.95819	0.799369	0.0660705	0.674048
101110847	RAB15	NC_056060.1:75147690-75171891	1.60834	0.448172	1.77826	0.0662088	0.675184
121819380	ABCA13	NC_056057.1:7991622-8385199	0.004248	0.0217303	-2.26759	0.0662735	0.67537
101110909	OLA1	NC_056055.1:135754320-135920186	16.8158	12.003	0.638962	0.0663163	0.67537
101116112	COQ7	NC_056077.1:17383040-17396627	18.23	12.1355	0.761414	0.0663273	0.67537
101119074	CLEC11A	NC_056067.1:56536309-56541778	9.93576	2.75875	1.8422	0.0663346	0.67537
101117110	KIAA1671	NC_056070.1:65307561-65479382	2.33182	3.88595	-0.906905	0.0663858	0.675479
780502	TYR	NC_056074.1:5844834-5961193	0.0152647	0.109393	-2.60431	0.0665673	0.676299
101110922	LOC101110922	NC_056056.1:94076915-94097312	0.629047	1.68632	-1.25617	0.0666221	0.676299
101103500	FOXC2	NC_056067.1:11928499-11931395	0.0511893	0.384658	-2.74783	0.0666353	0.676299
101122511	TMBIM6	NC_056056.1:136530531-136547134	409.278	272.276	0.763578	0.0666413	0.676299
101121160	BBLN	NC_056056.1:8100966-8104453	249.036	160.194	0.826714	0.0667519	0.676724
101112682	TRIM71	NC_056072.1:7215442-7276676	0.00830467	0	7.55565	0.0667863	0.676724
101107942	NFU1	NC_056056.1:38913302-38942249	77.4552	48.7382	0.84359	0.0668299	0.676724
101113171	CPT1C	NC_056067.1:55824135-55845557	0.730202	1.78953	-1.25125	0.0668449	0.676724
101114994	ONECUT2	NC_056076.1:57026442-57084710	0.050046	0.00938333	2.48263	0.0668743	0.676749
101109765	MCF2L2	NC_056054.1:204444714-204732435	0.142604	0.436384	-0.98933	0.066978	0.677525
101111516	PPIF	NC_056078.1:34155271-34162246	4.1159	1.77503	1.40397	0.0671673	0.678779
101123062	CDH13	NC_056067.1:8654268-9691383	125.546	248.763	-0.817187	0.067236	0.678779
541604	ISL1	NC_056069.1:27862846-27873820	0	0.0166413	-6.22542	0.0672824	0.678955
101111207	ATP2A3	NC_056064.1:24431368-24465648	2.42097	4.76432	-0.899511	0.067355	0.678955
100125354	PLIN2	NC_056055.1:87691066-87705676	36.5387	20.0256	0.915178	0.0673559	0.678955
101107401	LOC101107401	NC_056054.1:86927469-86936847	26.2066	50.3404	-0.839911	0.0673795	0.678955
101117948	ADAM11	NC_056064.1:44223835-44244442	2.4684	5.49625	-0.947532	0.0674093	0.678955
101112245	AHCY	NC_056066.1:63683003-63698683	41.221	26.7636	0.706115	0.0674169	0.678955
101106377	PDZK1IP1	NC_056054.1:21734463-21740233	0	0.0328717	-6.26381	0.0675118	0.679639
101110202	LOC101110202	NC_056077.1:37015559-37075518	0.00785967	0	7.75265	0.0675702	0.679954
101121805	WDR61	NC_056071.1:28495826-28517556	34.873	24.6109	0.653662	0.067618	0.680163
101103567	TIMM44	NC_056058.1:14417501-14430434	15.5464	10.3445	0.751914	0.0676788	0.680502
101122149	TSPAN4	NC_056074.1:46900248-46916041	15.5732	27.6095	-0.69789	0.0677363	0.680807
101107140	BNC1	NW_024599827.1:1391329-1419355	0.00605167	0	6.22	0.0678709	0.681069
101117529	EMC10	NC_056067.1:56350136-56356328	107.769	73.758	0.69299	0.0679429	0.68152
101115630	PLAG1	NC_056062.1:36313599-36364939	0.0822083	0.36941	-1.66805	0.0680352	0.682173
101111213	NDUFAF5	NC_056066.1:7201419-7234081	5.74148	3.79051	0.765622	0.0682552	0.684105
101122002	COQ10B	NC_056055.1:199759366-199776336	15.5011	10.7822	0.683707	0.0683897	0.68518
768095	CYP2J	NC_056054.1:34968559-35035865	7.86204	5.05222	0.762907	0.0684926	0.685265
XLOC_065723	XLOC_065723	NC_056061.1:90154032-90164606	1.5413	0.501311	1.93041	0.0685022	0.685265
101104367	BRI3	NC_056077.1:38168411-38175383	76.0506	55.2783	0.617762	0.0685062	0.685265
101105425	LOC101105425	NC_056064.1:31856076-31964960	3.83365	2.50106	0.773038	0.0685074	0.685265
114117770	LOC114117770	NC_056067.1:57662966-57707562	1.83486	0.309922	2.04956	0.0685635	0.685265
100302339	EPCAM	NC_056056.1:77020850-77031297	0.0850897	0.864952	-3.3641	0.0685939	0.685265
101114727	GLT1D1	NC_056070.1:48221342-48340161	0	0.00445733	-7.69837	0.0686108	0.685265
114117805	LOC114117805	NC_056067.1:44629888-44631406	0	0.348409	-7.69837	0.0686179	0.685265
101116840	THBS2	NC_056061.1:90823644-90852230	55.9247	30.8972	0.895357	0.0686438	0.685265
101107500	MARCHF4	NC_056055.1:218260748-218381429	0	0.00455767	-7.66278	0.0686791	0.685344
101103690	NDUFV2	NC_056076.1:41929119-41947824	101.807	69.9795	0.709985	0.0688819	0.686822
101106706	MVD	NC_056067.1:13438407-13445028	10.6905	6.32729	0.92514	0.0690137	0.687338
101121073	SRPX	NC_056080.1:37566469-37754979	21.3427	9.06852	1.24041	0.0690204	0.687338
101112765	MLEC	NC_056070.1:63059954-63082281	61.4346	36.5623	0.945236	0.0690432	0.687338
114112700	LOC114112700	NC_056055.1:250130104-250131869	5080.12	3546.57	0.636765	0.0692055	0.687903
101113198	FBP1	NC_056055.1:31790049-31821236	30.0988	21.5467	0.634581	0.0692274	0.687903
101112723	TIGAR	NC_056056.1:211559898-211581210	3.68086	1.78908	1.13659	0.0692345	0.687903
114109534	SSR1	NC_056073.1:47168723-47185722	102.018	67.3473	0.776125	0.0692434	0.687903
101120411	CPZ	NC_056059.1:115505551-115527876	6.33261	2.27554	1.48303	0.0693175	0.687903
445468	CAV1	NC_056057.1:53341135-53376048	431.531	747.476	-0.651002	0.0693764	0.687903
101122484	IFNGR2	NC_056054.1:122756234-122790290	65.9134	47.526	0.593841	0.0694017	0.687903
105612644	LOC105612644	NC_056054.1:109725429-109727075	0.273654	0.0257633	3.55331	0.0694246	0.687903
101105937	LOC101105937	NC_056066.1:53201151-53234114	0.0746253	0.00697133	3.54687	0.0694287	0.687903
101118929	SLC9A7	NC_056080.1:58084933-58262651	0.388983	0.802293	-0.873496	0.0695419	0.687903
101102321	MSI2	NC_056064.1:7785939-8192478	6.34212	3.79578	0.929759	0.0695488	0.687903
101109043	ASCC2	NC_056070.1:68916271-68952486	15.3462	10.7941	0.668461	0.0695595	0.687903
101115781	NDUFA9	NC_056056.1:211306508-211328210	42.0498	29.1618	0.692831	0.0696063	0.687903
101113851	LIAS	NC_056059.1:59299370-59315397	25.3219	16.2785	0.816948	0.0696472	0.687903
101108967	FAF1	NC_056054.1:24935201-25430376	23.256	17.2068	0.566809	0.0696946	0.687903
100270716	SLIRP	NC_056060.1:86997618-87003425	88.2661	63.1734	0.633114	0.069778	0.687903
101109540	STBD1	NC_056059.1:91951238-91956113	29.8397	19.2291	0.803196	0.0697975	0.687903
101117182	NMT2	NC_056066.1:29036501-29092985	5.90471	3.81221	0.648098	0.0697994	0.687903
101116034	DNAJC5G	NC_056056.1:34354198-34360295	0	0.0304753	-6.2369	0.0698038	0.687903
101118802	FAM117A	NC_056064.1:36601074-36643483	2.19852	3.89812	-0.70403	0.0698713	0.687903
105601845	LOC105601845	NC_056067.1:22052006-22052760	53.2013	109.882	-0.986628	0.069892	0.687903
114110104	ASCL2	NC_056074.1:45685760-45687628	0.426422	0.011158	5.38851	0.0698938	0.687903
121820312	LOC121820312	NC_056062.1:64764505-64806992	0	0.012024	-7.66008	0.0699149	0.687903
101107288	EPHA7	NC_056061.1:44018950-44234487	0.05081	0.159215	-1.53048	0.0700346	0.688743
780479	EGFR	NC_056072.1:880989-1095437	17.9655	13.1468	0.595472	0.0701024	0.689137
101109134	EPS8L3	NC_056054.1:87093617-87108258	0.0113533	0	6.0595	0.0701296	0.689137
101117331	TECR	NC_056058.1:9552730-9581115	86.197	54.2101	0.853448	0.0703279	0.690545
101115870	PDE3A	NC_056056.1:194721762-195094518	5.7111	9.62241	-0.614829	0.0703836	0.690598
101120171	ENPP2	NC_056062.1:93901841-94038039	22.8962	42.1932	-0.724791	0.0704159	0.690598
101120508	WDR64	NC_056065.1:34286142-34421065	0	0.00383367	-7.63018	0.0704733	0.690804
101113702	RGMA	NC_056071.1:13391833-13440841	3.06231	5.36877	-0.691571	0.0705129	0.690804
114118686	FOXD1	NC_056069.1:8315639-8318548	0.04737	0.364995	-2.76373	0.0705601	0.690804
101119304	LTC4S	NC_056058.1:1287596-1296477	4.66687	16.2008	-1.09073	0.0705662	0.690804
101106765	DDC	NC_056057.1:6131059-6225649	1.66075	0.623337	1.37548	0.0706374	0.690804
101110995	HSDL2	NC_056055.1:11141630-11199203	77.0556	54.3773	0.64967	0.070667	0.690804
101109546	BPNT2	NC_056062.1:36872514-36892924	20.2551	14.2099	0.673293	0.0706853	0.690804
101114292	PEX14	NC_056065.1:42222668-42364289	9.37899	6.81464	0.608312	0.070763	0.690804
101113390	ATG4A	NC_056080.1:127081625-127160522	9.91172	6.97059	0.663352	0.0707714	0.690804
100135685	ASRGL1	NC_056074.1:37286133-37308758	19.035	13.6718	0.603353	0.0707987	0.690804
101108240	ABCA10	NC_056064.1:60540314-60591346	9.21	6.32127	0.661746	0.070958	0.690804
101107362	METTL24	NC_056061.1:27162562-27284901	3.8842	2.75333	0.623769	0.0709603	0.690804
101112562	DDA1	NC_056058.1:5583007-5590841	24.1025	15.9081	0.771352	0.0710044	0.690804
101110554	RGS5	NC_056054.1:114799592-114856775	59.0165	36.707	0.795587	0.0710086	0.690804
101113302	FAM25A	NC_056078.1:40615460-40623961	2.02192	7.20837	-1.50196	0.0710543	0.690804
101106952	KPNA2	NC_056064.1:48646409-48656514	10.9469	7.16926	0.753046	0.0711284	0.690804
101111779	IGSF1	NC_056080.1:103470062-103485790	0.02334	0.144696	-2.45741	0.0711701	0.690804
101111205	TM4SF5	NC_056064.1:26455766-26461977	0.0759797	0	7.45242	0.0711797	0.690804
101111164	TMEM164	NC_056080.1:125089965-125271695	8.85527	5.15859	1.00671	0.0712432	0.690885
114113987	LOC114113987	NC_056056.1:136963316-136971573	5.4244	2.2457	1.44146	0.0713389	0.691277
101112759	NCAM1	NC_056068.1:23159619-23527282	0.937566	2.16018	-1.16634	0.0713571	0.691277
101106281	TMX2	NC_056068.1:79753435-79762753	32.7399	22.4985	0.699767	0.0713661	0.691277
101119818	DOCK6	NC_056058.1:13456224-13494590	6.40559	10.6578	-0.616401	0.0714962	0.69227
101102349	GIPC2	NC_056054.1:54488820-54714708	1.6913	3.03656	-0.683129	0.071582	0.692824
101116967	ARID3C	NC_056055.1:36936337-36944803	0	0.0114013	-5.35741	0.0716086	0.692824
100270719	UQCRH	NC_056054.1:20885822-20896099	274.169	193.64	0.669839	0.0717385	0.693289
101119460	LOC101119460	NC_056055.1:16641415-17071845	1.12481	0.337409	1.7457	0.0717395	0.693289
101113905	LRRC31	NC_056054.1:218177850-218205981	0.323159	0.924913	-1.3714	0.0719882	0.695054
101113708	IPO13	NC_056054.1:18588412-18608003	11.5256	7.36134	0.810856	0.0719924	0.695054
101104173	LIG1	NC_056067.1:54632912-54667834	4.6852	2.99276	0.801832	0.0720052	0.695054
101121776	GABRA4	NC_056059.1:66217148-66295717	0.0934203	0.0149743	2.81214	0.0720494	0.695213
101110931	VWF	NC_056056.1:210052637-210176248	42.8121	71.1114	-0.624763	0.0722115	0.695948
443249	SLC7A5	NC_056067.1:12844368-12873343	1.35284	0.69062	1.15524	0.0722799	0.695948
101113813	KPNA1	NC_056054.1:187710386-187752492	17.6848	12.7628	0.619158	0.0722839	0.695948
114109040	SPTSSA	NC_056071.1:42640242-42659843	42.2069	29.4393	0.676357	0.0723502	0.696242
101115748	DSC1	NC_056076.1:26315903-26351470	0	0.005065	-6.12001	0.0725117	0.697529
101122014	CLEC2D	NC_056056.1:206063927-206092050	7.99946	3.49975	1.09689	0.0725499	0.697629
101105546	KPNA4	NC_056054.1:227595422-227657200	36.2265	26.5078	0.597367	0.072623	0.698065
114117586	ADARB2	NC_056066.1:45627938-45869348	0	0.00204133	-7.60066	0.0726759	0.698306
101108541	VKORC1L1	NC_056077.1:28346341-28400903	58.0583	42.6541	0.579279	0.0727372	0.69845
101109216	FAH	NC_056071.1:23909323-23941979	56.0181	39.7912	0.653689	0.0727896	0.69845
101119977	PSMC2	NC_056057.1:46067206-46081510	68.6611	49.0588	0.628423	0.0728022	0.69845
101117743	USP44	NC_056056.1:131647241-131660028	0	0.0150593	-6.20324	0.0728789	0.698653
105612076	SPIB	NC_056067.1:56309964-56315821	0.105885	0.854181	-2.35824	0.0729135	0.698717
101110019	TPST1	NC_056077.1:28568828-28660199	10.8731	18.9437	-0.734993	0.0730061	0.699338
101103435	SLC25A22	NC_056074.1:46950345-46957254	5.80863	2.78684	1.18672	0.0730605	0.699592
101105748	SLC36A2	NC_056058.1:60346652-60375289	0.466766	0.17783	1.57184	0.0731064	0.699765
443515	IGF1R	NC_056071.1:7199205-7503235	4.5619	7.668	-0.660815	0.0731377	0.699797
780493	SMO	NC_056057.1:94799569-94827850	5.77021	10.7078	-0.823508	0.0732119	0.700073
101105885	WDR45	NC_056080.1:56030009-56035257	42.1399	27.9547	0.763481	0.0732884	0.700073
101115655	PGAM5	NC_056070.1:44550199-44556877	19.7193	13.1232	0.743428	0.0733004	0.700073
114109325	LSMEM2	NC_056072.1:50090100-50138128	0.424805	0.969586	-1.03842	0.0733059	0.700073
101109532	PALS2	NC_056057.1:72765800-72887264	1.43321	2.6139	-0.804474	0.0734028	0.700466
101116921	COPRS	NC_056064.1:18002184-18006677	14.7408	8.85712	0.849449	0.0734451	0.700603
101112709	AHDC1	NC_056055.1:239445134-239510094	2.72377	5.46522	-0.822068	0.0736538	0.70206
101103681	SYTL2	NC_056074.1:9269702-9391352	8.00235	5.38232	0.700656	0.0737628	0.702629
XLOC_131486	XLOC_131486	NC_056080.1:64427575-64701585	1.82471	2.7911	-0.7065	0.0737975	0.702629
101114710	ECT2L	NC_056061.1:63851204-63933817	0.095457	0.382554	-1.50192	0.0739399	0.703719
101102891	ANKS1B	NC_056056.1:168457609-169614125	0.0599837	0.116968	-0.865517	0.0740242	0.704126
101113555	PCCB	NC_056054.1:253552200-253646933	71.1757	48.4842	0.725608	0.0740388	0.704126
101118390	MAGI1	NC_056072.1:35500460-36158314	14.8061	23.0492	-0.581706	0.0741452	0.704871
101119210	ADAMTSL5	NC_056058.1:41580786-41589329	0.294254	1.0985	-1.74512	0.0742699	0.705606
101114278	PELI2	NC_056060.1:66605912-66795637	2.9706	4.83154	-0.57697	0.0742787	0.705606
101109366	SYNJ2	NC_056061.1:82291376-82394023	1.91326	1.03405	0.938573	0.074496	0.706649
101119707	AUP1	NC_056056.1:96380783-96383742	62.3045	42.0911	0.71812	0.0745346	0.706649
101115659	LOC101115659	NC_056072.1:52670245-52698420	1.48658	3.56173	-1.17502	0.074633	0.706649
101112707	SNTG2	NC_056055.1:633971-760162	0.003049	0	7.3643	0.0746486	0.706649
101120225	LOC101120225	NC_056055.1:232147682-232163028	0.282038	0.936779	-1.61225	0.0746673	0.706649
101120002	MAP1LC3C	NC_056065.1:34211038-34216768	3.16031	0.884426	1.83639	0.07467	0.706649
121816509	LOC121816509	NC_056067.1:45514817-45642916	0.250477	0.957337	-2.43123	0.0747716	0.706811
101107652	GPR156	NC_056054.1:185793997-185903854	0.596773	0.328649	0.963535	0.0747982	0.706811
101115615	CMAS	NC_056056.1:193717923-193733455	59.3433	110.875	-0.72943	0.0748142	0.706811
101119189	CHST7	NC_056080.1:58213903-58290651	7.37464	14.3189	-0.873571	0.0748345	0.706811
101121460	ACOX2	NC_056072.1:42944253-42974067	1.50053	0.389428	1.90246	0.0748784	0.706811
101102442	ROCK1	NC_056076.1:35456220-35580023	34.8495	25.6788	0.591482	0.07497	0.707032
101114125	TMEM230	NC_056066.1:47037102-47044928	33.4709	22.9114	0.710323	0.0749921	0.707032
106991715	GNAZ	NC_056070.1:71868761-71898845	4.7946	2.78125	0.962593	0.0750838	0.707561
101113262	LRRC36	NC_056067.1:34504914-34561420	0.213932	0.895014	-1.72947	0.0751045	0.707561
101112620	ATPAF1	NC_056054.1:21192321-21220349	18.169	12.9644	0.642274	0.0751521	0.707622
101121994	DTYMK	NC_056054.1:262134-269370	13.1135	8.181	0.849185	0.0751674	0.707622
443185	SCD	NC_056075.1:21026048-21041247	3175.09	1561.61	1.24142	0.0753013	0.708065
100216464	NDUFA1	NC_056080.1:114631255-114634397	146.829	99.6911	0.72427	0.0753479	0.708065
101106567	TBATA	NC_056078.1:26149035-26163977	0.0154917	0.224935	-3.57324	0.0753532	0.708065
443265	TIE1	NC_056054.1:17981605-18001753	5.57764	9.74935	-0.708875	0.0753554	0.708065
101113034	IL20RB	NC_056054.1:252830284-252867229	0.029029	0.149856	-2.1633	0.0753844	0.708072
101116073	ATF3	NC_056065.1:70399984-70412879	5.89096	2.95781	1.05149	0.0754629	0.708534
106991885	LOC106991885	NC_056077.1:3194903-3195838	8.50741	2.48156	1.87292	0.0755213	0.708534
101107515	HDAC7	NC_056056.1:138763316-138800526	8.23558	14.9909	-0.752894	0.0755586	0.708534
101120130	ACP3	NC_056054.1:257961230-258021590	0.008492	0.158564	-4.06366	0.0755753	0.708534
100135690	PSMB7	NC_056056.1:11423515-11480032	105.305	74.3547	0.652685	0.0756029	0.708534
XLOC_061131	XLOC_061131	NC_056060.1:22065274-22143189	1.56039	3.33067	-1.29324	0.075635	0.70857
114113857	DIPK1B	NC_056056.1:2813231-2821193	0.902332	0.164189	2.06079	0.0758041	0.709584
101105541	ECM1	NC_056054.1:100530479-100535726	3.40125	8.24146	-1.19917	0.0759074	0.70999
101109301	AHRR	NC_056069.1:71730434-71813381	0.00344867	0.0418483	-3.57581	0.0759663	0.70999
101116746	ABCC3	NC_056064.1:35777356-35825745	8.59898	5.86437	0.685517	0.0759715	0.70999
780473	CLDN1	NC_056054.1:197852420-197867634	0.789342	2.4957	-1.60738	0.0760001	0.70999
101121719	ADGRF2	NC_056073.1:20646202-20684448	0.023819	0.1866	-2.77124	0.0760263	0.70999
XLOC_032151	XLOC_032151	NC_056056.1:179489290-179503120	0.20264	0.764666	-1.77459	0.0760498	0.70999
101120272	PTPMT1	NC_056068.1:76298446-76304093	23.1986	15.5046	0.720217	0.0760694	0.70999
101109608	TUBB4B	NC_056056.1:703204-705642	55.434	37.0638	0.698072	0.0761744	0.71054
101104070	ATL1	NC_056060.1:41676500-41754974	0.621191	0.349439	0.96038	0.0763519	0.711033
101110122	CAPN6	NC_056080.1:123749062-123773801	0.690928	0.0517993	3.71365	0.0763527	0.711033
101116504	ZPR1	NC_056068.1:27166161-27175140	17.2361	11.778	0.699161	0.0764096	0.711033
101104800	ALG1	NC_056077.1:4656861-4670700	10.5223	6.61467	0.833485	0.07645	0.711033
101102224	ZMYND19	NC_056056.1:399540-409648	11.8207	7.27138	0.836488	0.0765209	0.711033
105601852	LOC105601852	NC_056064.1:32747859-32758643	5.80169	2.23507	1.45668	0.0765871	0.711256
101110448	CPEB4	NC_056069.1:5769821-5848195	11.3371	8.1172	0.617402	0.0766016	0.711256
101120217	CCL19	NC_056055.1:36883460-36885298	0.35288	2.04594	-2.30423	0.076684	0.711758
101105319	LRATD1	NC_056056.1:23149509-23153982	16.7305	7.72607	1.24506	0.0767301	0.711923
101109802	CCDC158	NC_056059.1:91950765-92037134	0.410636	0.208719	1.14218	0.0767706	0.712017
101115318	RRP9	NC_056072.1:49063605-49071669	2.18393	0.66443	1.80803	0.0768161	0.712017
121819512	LOC121819512	NC_056057.1:77803332-77816587	0.010692	0	5.94611	0.0768253	0.712017
101117623	SUCLG2	NC_056072.1:33944678-34240923	37.2647	27.627	0.579026	0.0769584	0.712987
780506	NAMPT	NC_056057.1:48840511-48883351	19.4978	13.763	0.669838	0.0770158	0.713255
101111409	LOC101111409	NC_056054.1:109172700-109179124	13.3247	5.42557	1.38693	0.0771209	0.713939
101108123	CARD10	NC_056056.1:181528012-181555588	4.00644	7.25694	-0.726373	0.0771893	0.713939
121818202	LOC121818202	NC_056080.1:53413483-53421022	3.51851	7.58223	-1.03706	0.0772318	0.713939
101108317	ZHX1	NC_056062.1:29565035-29588097	20.6823	14.9034	0.624975	0.0772817	0.714137
101116512	UBE2L3	NC_056070.1:72167909-72192722	77.4032	53.9829	0.680776	0.0773191	0.71422
105605440	GPR34	NC_056080.1:40733822-41097032	3.2925	6.44889	-0.796656	0.0775195	0.714973
101108097	NFATC1	NC_056076.1:942543-1035115	3.12143	5.53356	-0.779769	0.0775217	0.714973
114108764	LOC114108764	NC_056056.1:208167527-208550471	0.452899	1.70722	-1.59529	0.0775394	0.714973
105607861	LOC105607861	NC_056077.1:33992378-34001407	1.73444	0.679882	1.53062	0.0775428	0.714973
101119293	CLEC1B	NC_056056.1:205423525-205434204	0.0394753	0	7.29425	0.0775429	0.714973
101108865	FGD5	NC_056072.1:57322672-57448571	6.26948	10.1443	-0.594429	0.0776833	0.715741
101115641	BEND7	NC_056066.1:27479080-27564919	7.10958	5.04199	0.676516	0.0777159	0.715778
101113118	HAGH	NC_056077.1:1903546-1928389	57.6738	39.246	0.729459	0.0777498	0.715829
121818379	LOC121818379	NC_056080.1:91477686-91480384	13.6131	5.67548	1.46364	0.0778184	0.715913
101105114	LOC101105114	NC_056054.1:21338060-21358785	1.75226	0.752572	1.40625	0.0778547	0.715913
101113480	SLC1A4	NC_056056.1:43306721-43334826	4.10564	2.68503	0.757731	0.0779023	0.715913
101110204	ILDR2	NC_056054.1:118930348-119007403	0.726317	1.34219	-0.769244	0.0779301	0.715913
101113530	AMACR	NC_056069.1:39921618-39937075	19.8798	14.338	0.623833	0.0780156	0.716175
[truncated: 16,552 more rows]

## Sheet: SFK vs CSH
gene_id	gene_name	gene_locus	SFK_FPKM	CSH_FPKM	log2FoldChange	pvalue	padj
101112575	SNTG1	NC_056062.1:33295517-33701141	0	0.679908	-15.9485	6.26183e-55	7.89961e-51
100534643	UGT1A6	NC_056054.1:7254898-7413990	0.235507	0	13.8328	5.56386e-22	2.80764e-18
101112776	LOC101112776	NC_056074.1:37776443-37801622	2.3116	0	14.456	9.98185e-22	4.19753e-18
442993	UGT1A9	NC_056054.1:7254899-7426072	6.04641	0.187787	4.97999	1.29772e-21	4.67756e-18
101120795	FYB2	NC_056054.1:31269615-31402196	5.62835	0.0647783	6.43357	1.43325e-19	4.5203e-16
101102230	LOC101102230	NC_056057.1:41667753-41743177	2.73995	17.3694	-2.68559	1.6301e-17	3.73899e-14
101105400	LOC101105400	NC_056056.1:162884906-162906746	10.6081	0.836018	3.70767	2.75334e-15	5.3438e-12
101120720	GSG1L	NC_056077.1:25852025-26106682	0.0795657	0	12.7089	6.72085e-15	1.13049e-11
101107121	SGK2	NC_056066.1:72131680-72152569	14.0327	1.11849	3.63902	1.32987e-14	2.09713e-11
101120110	RETREG1	NC_056069.1:56691664-56848935	34.4948	4.72733	2.79657	3.51946e-14	5.22351e-11
101102901	NPNT	NC_056059.1:19569046-19646418	8.55623	1.95886	2.37252	1.72917e-13	2.29624e-10
443409	HSD11B1	NC_056065.1:73023447-73086378	10.0029	72.0168	-2.83647	8.54072e-13	1.02615e-09
101120301	ADAM18	NC_056079.1:34182248-34323718	3.18459	0.00569367	9.69407	1.33559e-12	1.53174e-09
XLOC_037452	XLOC_037452	NC_056056.1:148826598-148973511	3.02159	0.052931	6.79581	1.4939e-12	1.63881e-09
101114557	NPR3	NC_056069.1:41069885-41148931	16.3391	3.40919	2.24638	1.72475e-12	1.81321e-09
101117785	APOA1	NC_056068.1:27224306-27258309	36.1598	5.11282	2.77924	2.98529e-12	2.83449e-09
101107781	ABCB5	NC_056057.1:30313819-30431613	0.19497	0	12.9983	3.03322e-12	2.83449e-09
101110446	DNHD1	NC_056068.1:46229225-46299141	1.64646	0.0332793	5.62065	4.71811e-12	4.25153e-09
101120648	EFEMP1	NC_056056.1:68209719-68279889	88.0338	18.7432	2.21372	5.73168e-12	4.98676e-09
101112182	MYO5B	NC_056076.1:49792901-50130336	0.418313	2.28733	-2.47493	6.36746e-12	5.35525e-09
101122666	B3GALT1	NC_056055.1:141550150-142172431	0.0219827	0	12.2685	1.95372e-11	1.49377e-08
101105194	DNAH8	NC_056073.1:12592008-12906540	0.585541	0.065852	3.1102	3.14417e-11	2.33325e-08
101104951	APCDD1	NC_056076.1:42641301-42673958	13.183	68.5384	-2.38386	5.65151e-11	4.07409e-08
101119703	DNER	NC_056055.1:231387211-231765997	0.028799	0	12.0203	7.95767e-11	5.57722e-08
101104446	IGSF11	NC_056054.1:184631957-184768768	0.0859363	0	12.0998	1.01705e-10	6.75291e-08
443246	SLC1A3	NC_056069.1:37720041-37800700	4.53762	19.3759	-2.11581	1.59106e-10	1.0036e-07
101115141	SCCPDH	NC_056065.1:29856498-29885662	83.7183	12.8068	2.71069	2.58531e-10	1.59097e-07
101106191	GPR158	NC_056066.1:25330133-25633683	0.067997	0.730412	-3.43318	5.8925e-10	3.45753e-07
101122618	NNAT	NC_056066.1:66440928-66452531	10.0383	185.626	-4.0746	7.42816e-10	4.25955e-07
101108612	F13A1	NC_056073.1:47927227-48068069	155.743	42.3585	1.8729	9.97458e-10	5.59264e-07
101122806	SLC24A3	NC_056066.1:38474584-38900127	14.6008	3.28572	2.13812	1.09985e-09	6.0327e-07
101104397	GPX3	NC_056058.1:60066363-60074517	249.521	800.981	-1.70185	1.21574e-09	6.52647e-07
101120570	GFPT2	NC_056058.1:661383-781358	28.2143	8.61286	1.69836	1.27548e-09	6.70449e-07
100170327	FASN	NC_056064.1:50277417-50296144	263.413	66.3582	1.95481	1.7463e-09	8.81219e-07
101104952	PCOLCE2	NC_056054.1:246761534-246845863	132.85	38.4539	1.78316	3.17458e-09	1.57054e-06
443175	BMP7	NC_056066.1:58543775-58626484	2.97048	0.633344	2.22377	3.39642e-09	1.64798e-06
101104112	BDH1	NC_056054.1:192783700-192821650	7.31536	1.18531	2.64522	4.24981e-09	2.02315e-06
101123531	SCN1A	NC_056055.1:143441362-143596860	6.28188	1.5801	1.91433	4.94776e-09	2.3118e-06
101114226	LOC101114226	NC_056054.1:78066630-78089497	167.685	34.7747	2.23273	5.64264e-09	2.58854e-06
XLOC_058935	XLOC_058935	NC_056060.1:48035242-48231342	3.05987	0.449749	3.24583	6.71009e-09	2.99073e-06
101111845	RXRG	NC_056054.1:117393889-117446641	14.3698	48.7172	-1.75992	6.75643e-09	2.99073e-06
100302354	SDR16C5	NC_056062.1:36419716-36436019	25.393	4.93767	2.39236	8.31347e-09	3.6165e-06
101115615	CMAS	NC_056056.1:193717923-193733455	110.875	35.5927	1.62487	1.01585e-08	4.34423e-06
101118812	CHST8	NC_056067.1:43531750-43672983	0.87209	0.121463	2.82154	1.28826e-08	5.32853e-06
101113943	ADHFE1	NC_056062.1:43659771-43692926	12.2273	3.10991	1.95097	1.76342e-08	7.17626e-06
101109781	CSRNP3	NC_056055.1:143879600-144090253	0.271481	1.36518	-2.34525	1.83011e-08	7.32945e-06
101122443	SMOC1	NC_056060.1:79701734-79846394	19.2503	57.4651	-1.59483	2.21526e-08	8.73332e-06
443274	GRIA4	NC_056068.1:1498196-2166450	0	0.242161	-14.8476	2.60598e-08	9.96236e-06
101115439	NXPH2	NC_056055.1:171813034-171941729	0.954293	0.155424	2.58771	3.14125e-08	1.18294e-05
101112759	NCAM1	NC_056068.1:23159619-23527282	2.16018	0.459955	2.08496	3.67576e-08	1.36387e-05
100147799	CCND2	NC_056056.1:211598275-211621095	39.289	109.666	-1.50057	4.01687e-08	1.46883e-05
101102469	GCAT	NC_056056.1:215451555-215458241	36.2848	9.23637	1.96169	4.15922e-08	1.49916e-05
101123022	VIT	NC_056056.1:87222472-87347983	22.5216	6.07479	1.87767	4.31291e-08	1.53266e-05
101121348	NRG2	NC_056058.1:48690206-48887741	0.576922	0.0879017	2.69331	6.35487e-08	2.22694e-05
101108021	ASB5	NC_056079.1:6927493-6967241	17.4422	4.29587	2.01826	8.30732e-08	2.87126e-05
443241	HR	NC_056055.1:43477833-43494705	0.727433	5.26253	-2.75179	8.61536e-08	2.93749e-05
443054	GSTA1-1	NC_056073.1:24748145-24761908	56.0787	17.0147	1.70884	9.4339e-08	3.17369e-05
101118870	CAMK2B	NC_056057.1:78676828-78767627	0.387485	0.014252	4.61352	1.03432e-07	3.35675e-05
101109024	PENK	NC_056062.1:36548461-36552896	18.8595	0.0872023	7.69407	1.04019e-07	3.35675e-05
XLOC_094936	XLOC_094936	NC_056068.1:37606274-37610156	4.84512	0	12.87	1.06433e-07	3.35675e-05
101116564	ADAM22	NC_056057.1:73690146-73925588	0.830214	0.0999827	2.99881	1.12129e-07	3.46358e-05
105610609	DNAJB3	NC_056054.1:7255199-7425193	0.410654	0	11.0298	1.12565e-07	3.46358e-05
101120284	ADAMTS15	NC_056074.1:33918474-33943159	6.44727	22.0979	-1.82832	1.14997e-07	3.49576e-05
101111592	LMX1A	NC_056054.1:117169151-117341122	1.51896	0.449478	1.733	1.35545e-07	4.07134e-05
101118143	NTM	NC_056074.1:31966046-32920053	0.58836	0.128854	2.10382	1.38913e-07	4.12342e-05
101110947	FNDC1	NC_056061.1:83211841-83328100	16.9612	3.98527	2.1103	1.59262e-07	4.61879e-05
101105412	LOC101105412	NC_056059.1:117969869-117985023	0	0.336758	-10.9239	1.63552e-07	4.66222e-05
101118719	TMEM236	NC_056066.1:31581070-31621883	0.111289	1.18114	-3.40999	1.64455e-07	4.66222e-05
101121536	BFSP1	NC_056066.1:37476459-37513605	0.13138	0	10.8841	1.7635e-07	4.94386e-05
101113856	IVD	NC_056060.1:34227453-34239208	34.7961	11.2432	1.63491	2.293e-07	6.28856e-05
101103801	ACSS3	NC_056056.1:117145188-117318853	4.06037	13.1506	-1.7104	2.33274e-07	6.3135e-05
101112113	PTGR1	NC_056055.1:11930846-11961643	137.172	40.4006	1.77826	2.35214e-07	6.3135e-05
101119329	SELENOW	NC_056067.1:54431829-54435844	173.604	47.3653	1.8515	2.6085e-07	6.92789e-05
101121073	SRPX	NC_056080.1:37566469-37754979	9.06852	32.4355	-1.88298	2.67316e-07	7.02336e-05
101114059	ASB2	NC_056071.1:56316870-56364930	4.74746	18.0122	-1.9291	2.70011e-07	7.02336e-05
443450	BCAT2	NC_056067.1:55155036-55168365	28.2338	8.76803	1.67416	3.11824e-07	7.9471e-05
101111867	ACVR1C	NC_056055.1:152156739-152216366	20.2916	79.085	-1.99155	3.29516e-07	8.31402e-05
494437	SLC9A3	NC_056069.1:71652463-71689063	2.00938	0.0237647	6.30308	3.54307e-07	8.85102e-05
101117286	LOC101117286	NC_056074.1:37813436-37821311	0.845723	0	10.9017	3.89079e-07	9.55383e-05
101119408	TRAF5	NC_056065.1:71479036-71524875	3.59696	0.656009	2.36325	3.90014e-07	9.55383e-05
101111288	CA12	NC_056060.1:44842836-44907905	5.934	0.658559	3.22969	4.06114e-07	9.85256e-05
101118946	UNC5A	NC_056058.1:35995367-36059780	0.741167	0.029901	4.55154	4.34471e-07	0.000104401
121816819	LOC121816819	NC_056069.1:41074972-41150289	2.38	0.535029	2.41439	5.19447e-07	0.000123643
101111019	LIX1	NC_056058.1:94157146-94212852	0.806698	0.0304513	4.66792	5.41764e-07	0.00012775
101107690	HK2	NC_056056.1:96669457-96737497	0.836339	2.86022	-1.80939	5.96522e-07	0.000139092
101111950	SLC3A1	NC_056056.1:80003432-80041556	2.88043	0.262243	3.44445	6.00889e-07	0.000139092
101112583	GAS2L2	NC_056064.1:14347925-14355711	0.46627	6.40314	-3.79392	8.42618e-07	0.000191532
101106589	SPRY4	NC_056058.1:50981334-50995741	1.76792	8.81675	-2.42823	1.15302e-06	0.000253534
101121916	LOC101121916	NC_056080.1:11606390-11659248	0.034705	2.53995	-6.1777	1.15558e-06	0.000253534
443186	ACACA	NC_056064.1:13136279-13424653	116.544	49.0479	1.27118	1.37441e-06	0.000298946
101109484	GLRB	NC_056070.1:42220953-42315769	0.0542863	0	10.9913	1.57393e-06	0.000336542
100270685	KCNMA1	NC_056078.1:31813028-32580692	4.47816	1.81913	1.52622	1.70283e-06	0.000355076
101111507	DTNA	NC_056076.1:22491651-22797967	5.69618	1.53703	1.7183	1.95854e-06	0.000405049
101102396	GREM1	NC_056060.1:28161952-28176990	3.27714	24.1868	-2.93508	2.04091e-06	0.000418652
101120348	KCNH1	NC_056065.1:71671583-72092529	0.337096	0.066448	2.30207	2.48043e-06	0.00050067
101117677	ATP6V0D2	NC_056062.1:89465990-89521222	0	0.367591	-12.8815	2.73188e-06	0.000547048
100620053	KCNMB2	NC_056054.1:208923190-209171155	0.0639003	0	12.5975	2.94405e-06	0.000579029
101116323	LOC101116323	NC_056062.1:36462728-36485051	0.179056	0	10.6234	2.94473e-06	0.000579029
101104621	FAM53B	NC_056075.1:43725762-43839243	19.021	47.2661	-1.33016	2.96043e-06	0.000579029
101108738	SLC9A2	NC_056056.1:99084528-99173939	0.0324473	0	10.1293	3.39179e-06	0.000653268
101111297	MEDAG	NC_056063.1:30292645-30308359	82.472	26.6443	1.62708	3.60559e-06	0.00068572
101111038	EPHX1	NC_056065.1:28122842-28160799	132.46	50.6911	1.44856	3.61463e-06	0.00068572
100534646	UGT1A4	NC_056054.1:7254898-7321736	0.0698157	0.000191333	8.13915	3.69729e-06	0.000696166
101114783	HTR1E	NC_056061.1:50229737-50324998	0	0.0366827	-10.44	3.75606e-06	0.000701994
101112819	LOC101112819	NC_056059.1:10825466-11169213	0.009074	0	10.2223	3.80505e-06	0.00070592
101106407	CNKSR2	NC_056080.1:19700960-19987451	1.17129	0.337986	1.77316	3.97335e-06	0.000731763
101105506	IQGAP2	NC_056060.1:7641826-7949558	15.4068	5.80993	1.39685	4.88536e-06	0.000880447
101107858	SFRP4	NC_056057.1:51224818-51234927	88.9387	24.7379	1.79619	5.07747e-06	0.000908578
101108832	NDNF	NC_056059.1:4661867-4710532	3.12886	0.889077	1.81605	5.1973e-06	0.000917014
100642179	SLC22A3	NC_056061.1:84215939-84315416	5.08115	1.53703	1.68189	5.33039e-06	0.000927525
101123062	CDH13	NC_056067.1:8654268-9691383	248.763	88.5622	1.48301	5.67472e-06	0.000960932
101119508	TMEM132C	NC_056070.1:48474734-48918970	0.538356	2.36242	-2.13089	6.01244e-06	0.00101133
554321	LTF	NC_056072.1:52949688-52979789	2.65376	0.291779	3.11047	6.38394e-06	0.00106671
101119997	SCPEP1	NC_056064.1:7518442-7540656	146.924	51.8543	1.48888	6.48319e-06	0.00106981
101105703	PLCE1	NC_056075.1:15049874-15426052	3.9252	1.60516	1.26179	6.48727e-06	0.00106981
443045	ICAM1	NC_056058.1:12670619-12681109	44.8106	17.4358	1.29421	6.90915e-06	0.00113198
101118069	CDH20	NC_056076.1:60200349-60416373	0.0924647	1.18633	-3.6463	7.218e-06	0.00117495
101103673	OTULINL	NC_056069.1:58726668-58755738	13.5642	45.1976	-1.78784	7.61318e-06	0.00123133
101120331	SULT1E1	NC_056059.1:86074358-86132345	0	0.24202	-12.4214	8.09435e-06	0.00128856
101113649	CLDN11	NC_056054.1:217682947-217697791	16.3238	3.47923	2.19813	8.12024e-06	0.00128856
101107692	SULT4A1	NC_056056.1:220465545-220493349	0.0946583	0	9.91142	8.58692e-06	0.00133838
101116487	RDH10	NC_056062.1:49588777-49618257	5.35003	12.915	-1.29061	8.75551e-06	0.00135528
101107621	PFKFB3	NC_056066.1:10930780-11011954	9.48206	52.1095	-2.49259	8.83524e-06	0.00135928
101102287	OCA2	NC_056055.1:113216047-113555709	2.29143	0.851765	1.41768	8.89437e-06	0.00136008
101106878	PRR5L	NC_056068.1:65661102-65739196	8.54088	30.791	-1.85828	9.63371e-06	0.00146427
101116618	CXADR	NC_056054.1:140257443-140322127	3.30692	8.97258	-1.548	9.8146e-06	0.00148283
100302551	SLC39A13	NC_056068.1:76167205-76175531	7.9026	22.8249	-1.70454	1.02882e-05	0.00154513
101115946	THSD7B	NC_056055.1:173013644-174062362	0	0.010886	-12.1698	1.083e-05	0.00160736
101110076	PRG4	NC_056065.1:66828408-66844700	0.856114	7.39267	-3.11745	1.08969e-05	0.00160784
101103359	CDHR5	NC_056074.1:47067072-47073733	5.06279	0.308457	3.97054	1.10502e-05	0.00161762
101111411	PKD2L1	NC_056075.1:20959118-21003755	1.29681	0.170279	2.91581	1.11112e-05	0.00161762
100534645	UGT1A3	NC_056054.1:7254898-7383834	0.176675	0.006434	4.72737	1.11556e-05	0.00161762
101104118	NPTX2	NC_056077.1:37932982-37945080	0.215252	0	9.97648	1.16836e-05	0.0016845
101118655	DSG2	NC_056076.1:25942401-25993705	0.332848	0.005354	5.89502	1.20216e-05	0.0017234
101103235	PRDM6	NC_056058.1:28306677-28417656	0.247637	1.34955	-3.41549	1.23679e-05	0.00176303
101116192	DSC2	NC_056076.1:26368657-26406565	4.49881	0.542231	3.02034	1.25523e-05	0.00177925
101121049	PPT1	NC_056054.1:14675828-14691721	127.372	49.4126	1.3645	1.28678e-05	0.00181379
101105482	LMX1B	NC_056056.1:9416406-9502608	0.0305793	0	9.9912	1.34976e-05	0.00188137
101108443	CLSTN2	NC_056054.1:248958322-249703516	0.70192	0.149411	2.19107	1.35661e-05	0.00188137
101110189	LOC101110189	NC_056074.1:15572513-15577058	648.871	206.704	1.62724	1.3571e-05	0.00188137
101107516	LOC101107516	NC_056056.1:209168425-209178331	0.620909	4.48386	-2.85221	1.4395e-05	0.00197391
101102549	LOC101102549	NC_056060.1:84949518-84964352	3.06457	0.37281	3.01182	1.46287e-05	0.00199512
105605798	LOC105605798	NC_056065.1:6658630-6812356	3.11045	14.132	-2.31178	1.51793e-05	0.00205908
101113744	SCN8A	NC_056056.1:134502440-134702533	1.39431	0.378037	2.20371	1.5492e-05	0.00209026
101102052	MFAP5	NC_056056.1:206817679-206829449	119.45	51.7043	1.18953	1.57692e-05	0.00211634
101118773	PDE1B	NC_056056.1:131999771-132026453	6.03811	21.1926	-1.81886	1.59241e-05	0.00212582
100820755	SLC7A11	NC_056070.1:19472110-19828555	0.16428	0.7073	-2.12634	1.75853e-05	0.00233524
101107652	GPR156	NC_056054.1:185793997-185903854	0.328649	1.41473	-2.07922	1.86906e-05	0.00246902
101115381	ASGR2	NC_056064.1:26740083-26750949	0.316128	4.12574	-3.65022	1.96106e-05	0.00257706
101115040	DECR1	NC_056062.1:86594921-86635751	46.9034	19.7392	1.24904	2.03153e-05	0.00264267
443343	ALDH1A1	NC_056055.1:63749292-63804375	253.214	85.2905	1.5415	2.03194e-05	0.00264267
101109602	OLFM1	NC_056056.1:1380978-1420708	8.73602	1.87285	2.18257	2.04857e-05	0.00265064
101103544	GABBR2	NC_056055.1:49127459-49497513	0.752891	3.64302	-2.28775	2.06364e-05	0.00265652
101111344	PLCD4	NC_056055.1:220582609-220610628	4.80426	0.814136	2.47737	2.31669e-05	0.00294552
101107119	LOC101107119	NC_056066.1:42841301-42858263	49.6041	9.02823	2.40525	2.33542e-05	0.00294552
101118004	LOC101118004	NC_056056.1:131734361-131739875	73.1815	0	17.2946	2.33722e-05	0.00294552
101107059	ATP13A4	NC_056054.1:194706359-194832242	0	0.0768597	-11.8161	2.34652e-05	0.00294552
100125617	OSTN	NC_056054.1:196928293-196949416	0.019912	2.96777	-7.25001	2.46155e-05	0.00305948
101116433	MST1R	NC_056072.1:50404957-50418324	3.3291	11.8001	-1.81078	2.53156e-05	0.00313107
101109896	SLC25A34	NC_056065.1:51128627-51132982	12.8696	49.9277	-1.95086	2.56129e-05	0.00315238
101110821	MBNL3	NC_056080.1:102427886-102556674	11.0468	4.09181	1.41559	2.69977e-05	0.0033067
101106197	KCNJ14	NC_056067.1:54889730-54895223	0.327651	4.13444	-3.68458	2.73626e-05	0.00331977
101114271	UGDH	NC_056059.1:59319017-59353380	28.1835	82.9501	-1.54155	2.73709e-05	0.00331977
101115477	HYDIN	NC_056067.1:39336943-39684956	0.128206	0.0184187	2.76383	2.74992e-05	0.00331977
101121604	TACR3	NC_056059.1:21712367-21793451	0	0.159341	-12.3749	2.80178e-05	0.00335032
101118819	P2RX6	NC_056070.1:72394856-72408222	4.84845	0.394963	3.30695	2.9589e-05	0.0034886
101103031	AK4	NC_056054.1:40740898-40835953	27.427	10.817	1.33819	3.0377e-05	0.00356485
101102873	VEGFD	NC_056080.1:13523088-13567300	11.3016	4.26458	1.39149	3.26909e-05	0.00378359
101116142	CPAMD8	NC_056058.1:5851824-5951495	0.195416	0.0131167	3.87798	3.41125e-05	0.00389454
101113519	TPPP3	NC_056067.1:34565350-34569002	96.8728	36.4656	1.4061	3.4299e-05	0.00389819
101116541	CNTNAP5	NC_056055.1:189526480-190612887	0.226535	0.007098	5.0444	3.47587e-05	0.00393272
101113549	RRP12	NC_056075.1:18435271-18464131	0.662087	4.42895	-3.25794	3.54849e-05	0.00399549
101105111	ERC2	NC_056072.1:44644155-45645828	0.325181	0.0534173	2.40656	3.56302e-05	0.00399549
101110905	ACSL1	NC_056079.1:14371441-14437206	192.469	502.134	-1.38146	3.59116e-05	0.00400923
101109845	SFRP5	NC_056075.1:18747482-18752384	131.834	36.4328	1.82694	3.66136e-05	0.00406959
101119652	GRTP1	NC_056063.1:85941202-85960285	2.0429	0.186764	3.39618	3.94015e-05	0.00434122
114118024	LOC114118024	NC_056067.1:58794450-58827187	7.42269	2.81887	1.38084	3.98193e-05	0.00436818
101118565	FKBP5	NC_056073.1:9703220-9821793	47.1505	21.7014	1.10983	4.11879e-05	0.00448948
101104057	ATP6V0A4	NC_056057.1:103837944-103908225	0	1.47653	-15.2942	4.16751e-05	0.00451289
105608408	CHAD	NC_056064.1:35979090-35991350	3.05072	0.227523	3.64679	4.47939e-05	0.00480934
101123106	RETSAT	NC_056056.1:57198018-57214130	6.05357	15.8696	-1.40212	4.6288e-05	0.0049432
101107567	LHX8	NC_056054.1:51347806-51373862	0.0903503	0	9.74541	4.64514e-05	0.0049432
121820546	LOC121820546	NC_056064.1:13136200-13380448	7.41089	3.53689	1.15485	4.71268e-05	0.0049432
101102850	ACKR3	NC_056054.1:4622543-4635069	53.9959	21.8865	1.27612	4.71384e-05	0.0049432
101106520	LAMB4	NC_056057.1:50584942-50702633	0.23738	1.44002	-2.41733	4.77122e-05	0.00496695
101112356	H1-6	NC_056073.1:30829735-30834302	5.33579	0.480993	3.48164	4.78367e-05	0.00496695
101112563	LOC101112563	NC_056058.1:12648307-12663102	12.0019	3.2706	1.83179	4.8467e-05	0.00501177
101116120	VSTM4	NC_056078.1:42286683-42366808	7.12483	15.7596	-1.1306	4.90304e-05	0.00504933
101107224	RXFP1	NC_056070.1:40575489-40691511	0	0.0833227	-11.9593	5.12632e-05	0.00521692
101118793	SENP6	NC_056061.1:2433499-2564590	40.6101	93.6589	-1.19008	5.12652e-05	0.00521692
114111413	LOC114111413	NC_056080.1:11757233-11776762	0.0133633	1.26004	-6.53767	5.26051e-05	0.00533044
100337686	PON3	NC_056057.1:13363165-13398936	4.95265	0.45318	3.48986	5.70434e-05	0.00573411
101114832	ACP6	NC_056054.1:98711542-98732939	17.1822	5.92391	1.51988	5.72758e-05	0.00573463
101112877	CHST3	NC_056078.1:27296758-27334368	3.58076	9.1342	-1.3597	6.08184e-05	0.00606526
101112867	ECHS1	NC_056075.1:51214799-51223427	290.623	122.859	1.23687	6.13337e-05	0.00609256
101123656	LOC101123656	NC_056067.1:63301065-63308547	0	0.327983	-9.82662	6.20558e-05	0.00609571
101109387	GLYATL2	NC_056068.1:80865705-80874243	8.12539	0	14.7545	6.20902e-05	0.00609571
101120397	GREB1	NC_056056.1:20439410-20568243	0.880594	9.04097	-3.43078	6.28626e-05	0.00614068
101114659	DGKG	NC_056054.1:201655734-201881911	0.698786	0.257194	1.4163	6.3035e-05	0.00614068
101117909	GRHL3	NC_056055.1:242314036-242350519	0.0556517	0	9.63617	6.45445e-05	0.00626355
101118266	FGL2	NC_056057.1:45490769-45497317	52.2694	20.9833	1.29929	6.87337e-05	0.00661133
101111700	SFXN5	NC_056056.1:94962557-95088775	22.6357	8.57978	1.40868	6.89144e-05	0.00661133
101117888	OPCML	NC_056074.1:30857247-31902052	0.00602933	0	11.1683	6.93099e-05	0.00662409
101105659	FGFRL1	NC_056059.1:118028022-118040476	46.0773	113.937	-1.31444	7.04724e-05	0.00670977
101116336	LOC101116336	NC_056067.1:23441533-23469387	409.921	157.991	1.34882	7.09739e-05	0.00673212
101103643	HAPLN1	NC_056058.1:81084161-81161129	0	0.773074	-14.4746	7.18759e-05	0.00676679
101120375	ACSM1	NC_056077.1:18706881-18763346	180.41	50.0134	1.80878	7.24347e-05	0.00677748
101116442	DSC3	NC_056076.1:26423312-26481956	0.448091	0.0129827	4.82166	7.25266e-05	0.00677748
101108200	LRP2	NC_056055.1:140096304-140279121	0.62358	0.0105203	5.86963	7.47069e-05	0.00691822
100913164	EHF	NC_056068.1:63998618-64041973	4.23504	0.57741	2.86299	7.48552e-05	0.00691822
101103979	BTC	NC_056059.1:90435860-90484628	30.2277	66.9924	-1.15247	7.61774e-05	0.00701472
106990973	PAQR7	NC_056055.1:240956267-240967281	3.79691	0.429293	3.27283	7.72941e-05	0.00709166
101120943	PPP5C	NC_056067.1:53375668-53396254	26.0019	67.8611	-1.36857	7.79508e-05	0.007126
101101996	OGFRL1	NC_056062.1:2705781-2725902	23.7796	55.1573	-1.20403	8.0795e-05	0.00733288
114111402	LOC114111402	NC_056080.1:4338577-4412728	5.52976	0	14.3793	8.20376e-05	0.00741896
101114864	SMARCD3	NC_056057.1:115431506-115464684	39.2781	17.6958	1.12898	8.71448e-05	0.00779699
101120321	LRGUK	NC_056057.1:99466011-99575793	0.059588	0	11.1002	9.06943e-05	0.0080859
101115919	KCND3	NC_056054.1:89194925-89416362	6.47549	1.28888	2.31267	9.19773e-05	0.0081714
101110208	LOC101110208	NC_056055.1:10736406-10741504	9.42116	0	14.2241	9.26672e-05	0.00820192
101114332	GRID1	NC_056078.1:39423092-40110412	0.773642	0.173435	1.97223	9.29709e-05	0.00820192
101120058	ADAM28	NC_056055.1:41355896-41434059	0.501965	2.95081	-2.51179	9.40882e-05	0.00824374
101104337	ELMOD1	NC_056068.1:16728218-16815556	4.24149	13.4952	-1.6799	9.59367e-05	0.00837571
101114816	ACACB	NC_056070.1:64000943-64133686	0.806923	0.203623	1.93104	9.97571e-05	0.00864939
101101957	LOC101101957	NC_056080.1:130916329-130974603	0	0.0938743	-11.1099	0.000103018	0.00890154
101115211	THBS4	NC_056060.1:10970157-11023816	25.9494	9.6408	1.39072	0.000107011	0.00916042
101112958	HPGD	NC_056055.1:106312275-106347451	1.64042	8.51558	-2.44698	0.000107103	0.00916042
101122917	TNK2	NC_056054.1:191436264-191477631	10.219	24.2504	-1.28614	0.000113402	0.00966634
101103840	ADAMTS6	NC_056069.1:14157726-14447677	2.42699	0.478001	1.94813	0.00011598	0.00985287
101117078	GRID2	NC_056059.1:31427684-33118369	6.0882	0.423086	3.7158	0.00011696	0.00990278
101107231	BMP5	NC_056073.1:4655234-4799355	9.06626	23.1003	-1.35589	0.00011772	0.00993375
114109673	TOMM6	NC_056073.1:15634792-15647892	1.56572	16.8679	-2.68859	0.000119954	0.0100886
XLOC_034905	XLOC_034905	NC_056056.1:59444545-59509600	1.09916	8.49969	-2.89433	0.00012183	0.0102123
101107461	DPEP1	NC_056067.1:14083253-14089202	0.275903	0	9.31235	0.000126263	0.0105488
105601930	DMBT1	NC_056075.1:41915875-41999964	0.0719427	1.20876	-3.987	0.000129422	0.010777
101114011	LOC101114011	NC_056057.1:107718074-107724575	5.76905	0	13.8672	0.000130103	0.0107784
101118907	IP6K3	NC_056073.1:7997023-8021162	0.0879977	0	9.65878	0.000130292	0.0107784
121820615	LOC121820615	NC_056054.1:107521234-107563630	1.28774	0.011826	6.12814	0.00013146	0.0108395
101104595	LOC101104595	NC_056066.1:67203758-67240919	1.07348	0.0784237	3.82566	0.000133719	0.0109898
101102710	CLIP4	NC_056056.1:35955552-36022162	2.62363	0.775664	1.74041	0.000136829	0.0111893
101107605	LTBP2	NC_056060.1:83873808-83984376	6.26199	26.937	-2.1454	0.00014233	0.011547
101112608	RAB3B	NC_056054.1:26358392-26430780	3.17206	10.3598	-1.75562	0.000148428	0.0119666
101112328	CNBD1	NC_056062.1:88231038-88725652	0	0.0943743	-13.6482	0.00014845	0.0119666
105603308	CCDC85C	NC_056071.1:62183773-62262583	5.77631	2.15232	1.41947	0.000149103	0.0119805
101117990	ADGRA2	NC_056079.1:32161189-32197661	21.6114	49.5938	-1.23569	0.000157245	0.0125208
101102089	ADCY2	NC_056069.1:65471619-65927574	1.86839	0.588677	1.62681	0.000158543	0.012546
101120131	ACSM2B	NC_056077.1:18630445-18682053	0.540017	0.045581	3.52841	0.000159001	0.012546
101119394	GPAT3	NC_056059.1:98993788-99056662	2.96862	8.16055	-1.4625	0.000159118	0.012546
101114353	BSG	NC_056058.1:40882060-40888873	312.844	126.445	1.27895	0.000168635	0.0132138
101104704	UPK1B	NC_056054.1:184855084-184886235	0.161031	7.17417	-5.59677	0.000172378	0.0134652
101116322	DACT2	NC_056061.1:90228708-90239198	4.23127	0.782801	2.43454	0.000174893	0.013583
114118764	NKD2	NC_056069.1:71357167-71375220	24.4041	8.10402	1.54223	0.000177139	0.0136762
101117879	SEZ6L	NC_056070.1:66060997-66260453	0	0.0262707	-11.0739	0.000177247	0.0136762
101122238	PAPSS2	NC_056075.1:9048651-9152485	4.98773	1.90196	1.36977	0.000178609	0.0137393
101108300	ST6GAL2	NC_056056.1:61153418-61210966	0.103604	1.31102	-3.71601	0.000182984	0.0139302
101117129	LOC101117129	NC_056054.1:256287494-256332999	0	0.10195	-10.878	0.000183547	0.0139302
114113623	MUCL1	NC_056056.1:131777817-131781723	7.4059	0	13.4926	0.000184306	0.0139302
101102301	NAV3	NC_056056.1:113764225-114151648	4.96069	10.8559	-1.16536	0.000184789	0.0139302
101104067	CWH43	NC_056059.1:68286200-68355925	0.0450687	0	9.19727	0.000184956	0.0139302
443213	TAC3	NC_056056.1:162587308-162594037	0	3.91961	-13.4079	0.000188748	0.0141735
101108619	CIDEA	NC_056076.1:43297142-43307738	27.554	63.266	-1.20116	0.000191341	0.0143256
101103225	REEP1	NC_056056.1:58112757-58248157	4.79418	1.10059	2.14169	0.000192944	0.0144029
100135687	HIF3A	NC_056067.1:53341978-53373574	11.4792	32.1822	-1.53791	0.00019366	0.0144137
101108303	RAPGEF5	NC_056057.1:31829383-32083531	3.12466	1.52789	1.18445	0.000194349	0.0144224
101121716	SEMA3B	NC_056072.1:50138182-50149232	19.9133	5.95447	1.4982	0.000200103	0.0147239
101119731	CD24	NC_056061.1:30322800-30327353	7.32085	1.00712	2.86767	0.000200163	0.0147239
101117692	HPN	NC_056067.1:45069132-45088894	0.993232	0.103022	3.28012	0.00020387	0.014953
101118540	SLC47A2	NC_056064.1:33654531-33673677	0	0.0764103	-9.09392	0.000206237	0.0150828
106991715	GNAZ	NC_056070.1:71868761-71898845	2.78125	0.648299	2.08558	0.000214355	0.0156312
101120549	GPM6B	NC_056080.1:11932241-12088289	51.5388	22.164	1.17112	0.000215534	0.0156719
101102931	C7	NC_056069.1:33725914-33783183	68.0473	28.6127	1.25728	0.000217969	0.0158034
101112654	AGPAT4	NC_056061.1:84531388-84665649	1.19187	0.36408	1.63541	0.000219038	0.0158354
443390	OXT	NC_056066.1:51828205-51829108	0	6.23663	-11.1787	0.000223587	0.016118
443185	SCD	NC_056075.1:21026048-21041247	1561.61	567.429	1.49577	0.000225068	0.0161786
101123311	TBC1D4	NC_056063.1:50922693-51136940	6.13338	12.2132	-1.02018	0.000234348	0.0167978
101111394	SPEF2	NC_056069.1:38516778-38720147	0.823536	2.50815	-1.6047	0.000235758	0.0168034
101111396	LOC101111396	NC_056070.1:13531288-13647469	0.781888	0.206057	1.92597	0.000236676	0.0168213
101112981	LOC101112981	NC_056059.1:103672878-103707018	4.46215	0.782802	2.51741	0.000241376	0.0171072
101108119	LPCAT3	NC_056056.1:209295843-209329419	4.30176	9.63166	-1.17065	0.000243181	0.0171869
101115172	LOC101115172	NC_056054.1:269001773-269028730	75.7254	22.2032	1.81569	0.000248467	0.0174738
101106534	LOC101106534	NC_056063.1:70075752-70263609	3.58876	1.36823	1.36875	0.000248626	0.0174738
100144763	CCND1	NC_056074.1:43282125-43294598	15.8564	6.4577	1.29451	0.000254438	0.0178326
106990245	SH3GL2	NC_056055.1:86020520-86244359	4.81376	1.97263	1.28644	0.000256637	0.0179264
101113333	CFAP299	NC_056059.1:95737996-96433016	0.032119	0	13.1189	0.000257198	0.0179264
101120207	LOC101120207	NC_056054.1:99857809-99994847	18.1268	0.307643	5.63092	0.000258766	0.017986
101113024	DENND2D	NC_056054.1:88526654-88546526	1.34697	6.10138	-2.17766	0.000279841	0.0192389
101105019	JPH3	NC_056067.1:12685621-12762859	0.0165307	0	8.97991	0.000283388	0.0194298
101112511	ACER3	NC_056068.1:55016625-55161250	29.4379	63.7996	-1.11076	0.000286977	0.0195695
101112716	KRT7	NC_056056.1:134138551-134152159	1.56447	0	12.9891	0.000290903	0.0197838
101117184	LOC101117184	NC_056067.1:23514101-23515907	0.756899	23.0916	-4.85844	0.000292517	0.01984
101119373	GPR143	NC_056080.1:399613-430432	1.6747	0.0270007	5.92386	0.000297083	0.0200468
101123284	LOC101123284	NC_056056.1:149937563-150004070	3.6771	1.30073	1.48057	0.000297155	0.0200468
101106345	PPM1E	NC_056064.1:9416247-9642789	0.811806	0.247484	1.7234	0.000300819	0.0202399
101111328	PHGDH	NC_056054.1:97076507-97107600	5.59245	1.64658	1.71558	0.00031763	0.0212014
101121984	AK5	NC_056054.1:53742716-54015273	0.338518	0.0460253	2.84402	0.0003207	0.0213498
101102483	ISOC1	NC_056058.1:22749833-22770794	15.1206	31.8652	-1.07504	0.00033009	0.0218024
100913161	HSD17B2	NC_056067.1:8096021-8195156	0.187334	0	12.8535	0.000331844	0.021861
101116705	IL33	NC_056055.1:74208883-74351774	43.5926	20.1619	1.09619	0.000333213	0.021893
101115049	TMC6	NC_056064.1:53357503-53375073	0.827602	4.25706	-2.18822	0.000334065	0.021893
101106563	GRK7	NC_056054.1:247736226-247777782	0.028364	0	8.84636	0.000341619	0.0222682
101114766	RRP7A	NC_056056.1:219361436-219369411	0.377355	4.29471	-3.48024	0.000342438	0.0222682
100307038	CYGB	NC_056064.1:54560751-54569112	35.2069	101.232	-1.5175	0.000348499	0.022604
101107564	COL8A1	NC_056054.1:164842019-165008330	18.0662	7.30813	1.27492	0.000360612	0.0232107
101104932	UCP2	NC_056068.1:52076299-52147536	6.18315	14.8994	-1.39529	0.000365737	0.0233618
101106188	KIF19	NC_056064.1:56357793-56385396	0.0395147	0	8.7344	0.000367631	0.0233633
443323	FST	NC_056069.1:25757523-25764025	17.2916	5.3182	1.75778	0.000367842	0.0233633
101104165	LOC101104165	NC_056065.1:37919854-37948097	83.4428	40.3917	1.02451	0.000371493	0.0233633
101102435	RIMS3	NC_056054.1:15159172-15204874	3.61726	10.2091	-1.54561	0.000375307	0.0233916
101113980	EFHD1	NC_056054.1:8271919-8316115	30.3965	13.8659	1.10827	0.000387699	0.023813
101106006	TGFBI	NC_056058.1:45095177-45128206	43.4503	20.916	1.05423	0.000388226	0.023813
443058	SPP1	NC_056059.1:37363570-37376486	6.1569	55.5131	-3.10999	0.000388846	0.023813
100329218	SREBF1	NC_056064.1:34382401-34398512	8.62921	20.6496	-1.28068	0.000391142	0.0238957
100913159	ST6GAL1	NC_056054.1:200979762-201014327	14.3612	6.75251	1.07619	0.000410071	0.0248714
101119179	SLC44A3	NC_056054.1:71909765-71994278	1.19085	0.219774	2.34941	0.000416868	0.0251174
101109357	PDE5A	NC_056059.1:6167892-6387089	11.9927	29.3283	-1.36745	0.000430514	0.025713
121818205	LOC121818205	NC_056080.1:4432053-4439412	2.14788	0	12.6209	0.000431597	0.025713
101113869	VASH2	NC_056065.1:70068501-70109817	5.56797	1.97906	1.3864	0.000433161	0.025713
101112558	IFRD1	NC_056057.1:57446467-57494157	9.49527	16.2354	-1.1842	0.000433796	0.025713
101106941	FGFBP1	NC_056059.1:111950825-111953834	0.387653	0	8.84449	0.000434138	0.025713
100270713	IGFBP7	NC_056059.1:73147302-73227030	253.88	110.868	1.16658	0.00043707	0.0257629
101117465	SLC7A14	NC_056054.1:217551585-217666538	0.00894467	0	8.65161	0.000439064	0.0257629
101109267	SVOPL	NC_056057.1:103730693-103836215	0.132965	0.675929	-2.37182	0.000456041	0.0266351
101112653	IL20RA	NC_056061.1:62262512-62296265	0.0525593	3.34836	-6.08526	0.000460879	0.0268555
101113459	SVEP1	NC_056055.1:12788761-12991896	41.9534	17.8271	1.19001	0.000464732	0.0270176
101103375	PIR	NC_056080.1:13567720-13666147	12.847	6.16897	1.02904	0.00046765	0.0271248
101109898	EEF1A2	NC_056066.1:53854713-53862458	0.0350597	2.98838	-6.18591	0.00046894	0.0271372
101121972	NIPSNAP1	NC_056070.1:68744714-68772472	10.1416	4.24188	1.2316	0.000474567	0.0272863
101116799	LOC101116799	NC_056080.1:4315395-4322267	2.15298	0	12.522	0.000474724	0.0272863
101103913	PMEPA1	NC_056066.1:58149219-58206725	14.8364	47.8554	-1.75878	0.000474761	0.0272863
101112629	PTPN4	NC_056055.1:185086041-185287152	8.01735	17.4154	-1.14274	0.000484738	0.0277964
101118075	NR1I2	NC_056054.1:185462876-185495197	0.180558	0.00251333	5.9618	0.000503632	0.0287492
101121993	LOC101121993	NC_056054.1:239638882-239682659	0.323853	0	12.4642	0.000509137	0.0289978
101104909	HS3ST1	NC_056059.1:107160286-107196368	2.51364	0.721182	1.79036	0.000513475	0.0291488
105616273	LOC105616273	NC_056054.1:7189190-7246859	0.298796	0.009033	4.96931	0.000515254	0.0291488
443408	LPL	NC_056055.1:45917232-45942109	149.839	414.441	-1.52285	0.000518622	0.0292737
[truncated: 18,323 more rows]

## Sheet: up-regulated in HUS and SFK
KCNMB2
B3GALT1
FYB2		logFC>1
[truncated: 33 more rows]
